# Supplementary material for: DMSO/SOCl2-mediated C(sp2)–H amination: switchable synthesis of 3-unsubstituted indole and 3-methylthioindole derivatives
Source: Royal Society of Chemistry journal article supplement (doi:10.1039/d0cc07453e), 2020-12-21

## DMSO/SOCl<sub>2</sub>-mediated C(sp<sup>2</sup>)-H amination: switchable synthesis of

### 3-unsubstituted indole and 3-methylthioindole derivatives

Jingran Zhang,<sup>a</sup> Xiaoxian Li,<sup>a</sup> Xuemin Li,<sup>a</sup> Haofeng Shi,<sup>a</sup> Fengxia Sun<sup>b</sup>  
and Yunfei Du<sup>\*a</sup>

<sup>a</sup>*School of Pharmaceutical Science and Technology, Tianjin University, Tianjin 300072, China.*

<sup>b</sup>*College of Chemical and Pharmaceutical Engineering, Hebei University of Science and Technology; Hebei Research Center of Pharmaceutical and Chemical Engineering, Shijiazhuang 050018, China.*

Tel: +86-22-27406121; [duyunfeier@tju.edu.cn](mailto:duyunfeier@tju.edu.cn)

## Supporting Information

### Contents

|            |                                                                                                                                  |          |
|------------|----------------------------------------------------------------------------------------------------------------------------------|----------|
| <b>I</b>   | General Information                                                                                                              | S2       |
| <b>II</b>  | Details for Optimization of Reaction Conditions                                                                                  | S3-S4    |
| <b>III</b> | Experimental Procedures and Spectroscopic Data                                                                                   | S5-S42   |
| <b>IV</b>  | References                                                                                                                       | S43      |
| <b>V</b>   | <sup>1</sup> H and <sup>13</sup> C NMR Spectra of Compounds <b>1a-af</b> , <b>2a-ac</b> , <b>2a'</b> , <b>3a-l</b> and <b>3'</b> | S44-S193 |

## I. General Information

$^1\text{H}$  and  $^{13}\text{C}$  NMR spectra were recorded on a 400 MHz or 600 MHz spectrometer at 25 °C. Chemical shifts values are given in ppm and referred as the internal standard to TMS: 0.00 ppm. Chemical shifts were expressed in parts per million ( $\delta$ ) downfield from the internal standard tetramethylsilane, and were reported as s (singlet), d (doublet), t (triplet), q (quadruple), dd (doublet of doublet), m (multiplet), etc. The coupling constants  $J$ , are reported in Hertz (Hz). High resolution mass spectrometry (HRMS) was obtained on a Q-TOF micro spectrometer. Melting points were determined with a Micromelting point apparatus. TLC plates were visualized by exposure to ultraviolet light.

Reagents and solvents were purchased as reagent grade and were used without further purification. All reactions were performed in standard glassware, heated at 70 °C for 3 h before used. The starting materials **1** were prepared according to literature methods.<sup>1</sup> Flash column chromatography was performed over silica gel (200-300 m) using a mixture of ethyl acetate (EtOAc) and petroleum ether (PE).

## II. Details for Optimization of Reaction Conditions

**Table S1. Optimization of reaction conditions for synthesis of 3a<sup>2</sup>**

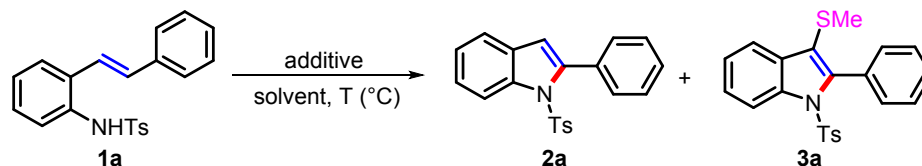

| entry            | solvent     | additive (equiv)              | T (°C)    | time (min) | yield (%) <sup>b</sup> |           |
|------------------|-------------|-------------------------------|-----------|------------|------------------------|-----------|
|                  |             |                               |           |            | <b>2a</b>              | <b>3a</b> |
| S1               | DMSO        | SOCl <sub>2</sub> (3.0)       | rt        | 30         | 92                     | 0         |
| S2               | DMSO        | SOCl <sub>2</sub> (3.5)       | rt        | 30         | 86                     | 0         |
| S3               | DMSO        | SOCl <sub>2</sub> (4.0)       | rt        | 30         | 85                     | 0         |
| S4               | DMSO        | SOCl <sub>2</sub> (3.0)       | 70        | 30         | 80                     | 10        |
| S5               | DMSO        | SOCl <sub>2</sub> (3.5)       | 70        | 50         | 43                     | 35        |
| S6               | DMSO        | SOCl <sub>2</sub> (3.8)       | 70        | 50         | 25                     | 48        |
| <b>S7</b>        | <b>DMSO</b> | <b>SOCl<sub>2</sub> (4.0)</b> | <b>70</b> | <b>40</b>  | <b>0</b>               | <b>55</b> |
| S8               | DMSO        | SOCl <sub>2</sub> (4.2)       | 70        | 30         | 0                      | 26        |
| S9               | DMSO        | SOCl <sub>2</sub> (4.5)       | 70        | 30         | 0                      | trace     |
| S10              | DMSO        | SOCl <sub>2</sub> (4.0)       | 80        | 40         | 0                      | 39        |
| S11              | DMSO        | SOCl <sub>2</sub> (4.0)       | 90        | 40         | 0                      | 26        |
| S12 <sup>c</sup> | DMSO        | SOCl <sub>2</sub> (4.0)       | 70        | 40         | 0                      | 50        |

<sup>a</sup> Reaction conditions: **1a** (0.5 mmol), DMSO (1 mL), unless otherwise stated. <sup>b</sup> Isolated yields.

<sup>c</sup> Reaction conditions: **1a** (0.5 mmol), DMSO (1 mL), reacted at rt for 30 min and then reacted at 70 °C.

The conditions were further optimized to improve the yield of 3-methylthioindole **3a**, and the results were shown below. When the reaction was carried out at room temperature, the increasing of the dosage of SOCl<sub>2</sub> could not enable the conversion of indole **2a** to 3-methylthioindole **3a** (Table S1, entries S1-S3). To our delight, when the reaction was run at 70 °C by reacting substrate **1a** with 3.0 equiv of SOCl<sub>2</sub>, product **3a** was obtained in 10% yield, together with 80% yield of 3-unsubstituted indole **2a**. With the increasing dosage of SOCl<sub>2</sub>, the formation of more

product **3a** and the depletion of product **2a** were observed. When 4.0 equiv of SOCl<sub>2</sub> was applied, product **3a** was obtained in 55% yield, with no isolation of product **2a** (Table S1, entries S4-S7). However, further increasing the equiv of SOCl<sub>2</sub> led to a lower-yielding of product **3a**, due to the formation of some more unidentified byproducts (Table S1, entries S8-S9). Attempts to further improve the outcome by raising and lowering the temperature proved to be futile. Combining all the testing results, the optimized conditions of DMSO/SOCl<sub>2</sub>-mediated synthesis of 3-methylthioindole **3a** were concluded to be: 0.5 mmol of **1a** with 4.0 equiv of SOCl<sub>2</sub> in DMSO (1 mL) at 70 °C.

### III. Experimental Procedures and Spectroscopic Data

#### 1. Typical procedure for the synthesis of 2-styrylaniline derivatives **1** (1a-z, 1aa-af):

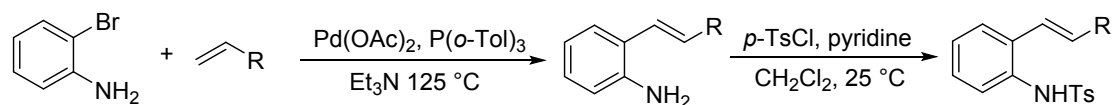

**Method A:** To a solution of 2-bromoaniline (2.7 g, 15.5 mmol) in Et<sub>3</sub>N (15.0 mL, 1.0 M) were added Pd(OAc)<sub>2</sub> (34.8 mg, 0.155 mmol, 1 mol%), P(*o*-Tol)<sub>3</sub> (398.0 mg, 1.241 mmol, 8 mol%), and olefin (18.62 mmol). After being stirred at 125 °C overnight, the reaction mixture was poured into water and then the product was extracted with CH<sub>2</sub>Cl<sub>2</sub> (3 x 30 mL). The combined organic layer was washed with brine, dried over Na<sub>2</sub>SO<sub>4</sub>, and concentrated *in vacuo*. The residue was purified by flash column chromatography on silica gel (EtOAc/petroleum ether = 1/5) to afford the corresponding 2-styrylaniline products.

To a solution of 2-styrylaniline (1.95 g, 10.0 mmol) in pyridine (20 mL) was added *p*-toluenesulfonyl chloride (2.10 g, 11.0 mmol) at 0 °C. After being stirred at 25 °C for 2 hours, the reaction mixture was poured into water and then the product was extracted with CH<sub>2</sub>Cl<sub>2</sub> (3 x 30 mL), dried over Na<sub>2</sub>SO<sub>4</sub>, and concentrated *in vacuo*. The residue was purified by column chromatography on silica gel (EtOAc/petroleum ether = 1/5) to give the corresponding product **1**.

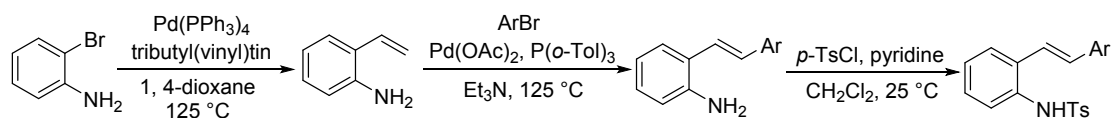

**Method B:** To a solution of 2-bromoaniline (1.801 mmol, 309.8 mg) in 1,4-dioxane (0.13 M, 14.0 mL) were added Pd(PPh<sub>3</sub>)<sub>4</sub> (2 mol%, 0.0360 mmol, 41.6 mg), tributyl(vinyl)tin (2.161 mmol, 0.7 mL). The resulting mixture was heated to 125 °C with stir for 4 hours. When the reaction was completed, the reaction mixture was cooled to room temperature and 10% KF aqueous solution (22 mL) was added. Then the mixture was allowed to stand for 2 h and then filtered with celite. The reaction mixture was extracted with EtOAc (3 x 30 mL). The combined organic layer was washed with brine, dried over Na<sub>2</sub>SO<sub>4</sub>, and concentrated *in vacuo*. The residue was

purified by column chromatography on silica gel (CH<sub>2</sub>Cl<sub>2</sub> : *n*-hexane = 1:1) to give 2-vinyylaniline (188.0 mg, 83%) as a brown oil.

To a solution of 2-vinyylaniline (1.19 g, 10.0 mmol) in Et<sub>3</sub>N (10 mL) were added Pd(OAc)<sub>2</sub> (1 mol%), P(*o*-Tol)<sub>3</sub> (8 mol%), and ArBr (1.88 g, 12.0 mmol). After being stirred at 125 °C overnight, the reaction mixture was poured into water and then the product was extracted with CH<sub>2</sub>Cl<sub>2</sub> (3 x 30 mL). The combined organic layer was washed with brine, dried over Na<sub>2</sub>SO<sub>4</sub>, and concentrated *in vacuo*. The residue was purified by column chromatography on silica gel (EtOAc/petroleum ether = 1/5) to afford the corresponding 2-styrylaniline product.

To a solution of 2-styrylaniline (1.95 g, 10.0 mmol) in pyridine (20mL) was added *p*-toluenesulfonyl chloride (2.10 g, 11.0 mmol) at 0 °C. After being stirred at 25 °C for 2 hours, the reaction mixture was poured into water and then the product was extracted with CH<sub>2</sub>Cl<sub>2</sub> (3 x 30 mL), dried over Na<sub>2</sub>SO<sub>4</sub>, and concentrated *in vacuo*. The residue was purified by column chromatography on silica gel (EtOAc/petroleum ether = 1/5) to give the corresponding product **1**.

## 2. Spectroscopic Data of 2-Styrylaniline Derivatives **1** (1a-z, 1aa-af):

### (*E*)-4-Methyl-*N*-(2-styrylphenyl) benzenesulfonamide (**1a**)

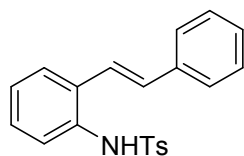

Following the general procedure **Method A**, **1a** was purified by silica gel chromatography (10% EtOAc/petroleum ether). A white solid (yield: 79%); m.p. 144-146 °C. *R<sub>f</sub>* = 0.50 (20% EtOAc/petroleum ether); <sup>1</sup>H NMR (600 MHz, CDCl<sub>3</sub>) δ 7.62 (d, *J* = 8.3 Hz, 2H), 7.49 (dd, *J* = 7.1, 2.1 Hz, 1H), 7.38 (dd, *J* = 7.6, 1.6 Hz, 1H), 7.35 – 7.31 (m, 4H), 7.30 – 7.26 (m, 1H), 7.26 – 7.20 (m, 2H), 7.15 (d, *J* = 8.1 Hz, 2H), 6.81 (dd, *J* = 43.4, 16.1 Hz, 2H), 6.68 (s, 1H), 2.29 (s, 3H). <sup>13</sup>C NMR (151 MHz, CDCl<sub>3</sub>) δ 143.9, 136.7, 136.6, 133.3, 133.3, 132.2, 129.7, 128.6, 128.4, 128.1, 127.2, 127.1, 126.8, 126.7, 126.6, 122.7, 21.5. HRMS (ESI) calcd for C<sub>21</sub>H<sub>19</sub>NNaO<sub>2</sub>S<sup>+</sup> [M + Na<sup>+</sup>] 372.1029, found 372.1028.

**(E)-N-(5-Fluoro-2-styrylphenyl)-4-methylbenzenesulfonamide (1b)**

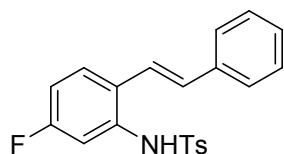

Following the general procedure **Method A**, **1b** was purified by silica gel chromatography (10% EtOAc/petroleum ether). A white solid (yield: 71%); m.p. 114-116 °C.  $R_f$  = 0.50 (20% EtOAc/petroleum ether);  $^1\text{H}$  NMR (600 MHz,  $\text{CDCl}_3$ )  $\delta$  7.66 (d,  $J$  = 8.2 Hz, 2H), 7.40 (dd,  $J$  = 8.6, 6.2 Hz, 1H), 7.37 – 7.26 (m, 5H), 7.19 (dd,  $J$  = 9.7, 2.5 Hz, 3H), 6.90 (td,  $J$  = 8.3, 2.6 Hz, 1H), 6.79 – 6.65 (m, 3H), 2.32 (s, 3H).  $^{13}\text{C}$  NMR (151 MHz,  $\text{CDCl}_3$ )  $\delta$  162.2 (d,  $^1J_{\text{C-F}}$  = 247.1 Hz), 144.3, 136.5, 136.4, 134.7 (d,  $^3J_{\text{C-F}}$  = 10.2 Hz), 132.7 (d,  $^4J_{\text{C-F}}$  = 3.8 Hz), 129.8, 128.7, 128.3, 128.2, 128.1 (d,  $^4J_{\text{C-F}}$  = 2.5 Hz), 127.2, 126.6, 121.6, 113.7 (d,  $^2J_{\text{C-F}}$  = 21.4 Hz), 112.2 (d,  $^2J_{\text{C-F}}$  = 24.6 Hz), 21.5. HRMS (ESI) calcd for  $\text{C}_{21}\text{H}_{18}\text{FNNaO}_2\text{S}^+$  [ $\text{M} + \text{Na}^+$ ] 390.0934, found 390.0936.

**(E)-N-(4-Fluoro-2-styrylphenyl)-4-methylbenzenesulfonamide (1c)**

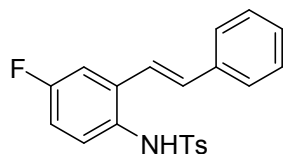

Following the general procedure **Method A**, **1c** was purified by silica gel chromatography (10% EtOAc/petroleum ether). A white solid (yield: 69%); m.p. 151-153 °C.  $R_f$  = 0.57 (20% EtOAc/petroleum ether);  $^1\text{H}$  NMR (600 MHz,  $\text{CDCl}_3$ )  $\delta$  7.59 (d,  $J$  = 8.2 Hz, 2H), 7.35 – 7.26 (m, 6H), 7.20 (dd,  $J$  = 9.6, 2.9 Hz, 1H), 7.13 (d,  $J$  = 8.0 Hz, 2H), 6.95 – 6.89 (m, 1H), 6.78 (dd,  $J$  = 48.5, 16.1 Hz, 3H), 2.25 (s, 3H).  $^{13}\text{C}$  NMR (151 MHz,  $\text{CDCl}_3$ )  $\delta$  161.7 (d,  $^1J_{\text{C-F}}$  = 245.4 Hz), 144.03, 136.5 (d,  $^3J_{\text{C-F}}$  = 8.2 Hz), 136.35, 136.33, 132.71, 130.1 (d,  $^3J_{\text{C-F}}$  = 8.8 Hz), 129.71, 129.0 (d,  $^4J_{\text{C-F}}$  = 2.4 Hz), 128.64, 128.37, 127.21, 126.86, 121.96, 115.2 (d,  $^2J_{\text{C-F}}$  = 22.8 Hz), 112.5 (d,  $^2J_{\text{C-F}}$  = 23.2 Hz), 21.42. HRMS (ESI) calcd for  $\text{C}_{21}\text{H}_{18}\text{FNNaO}_2\text{S}^+$  [ $\text{M} + \text{Na}^+$ ] 390.0934, found 390.0936.

**(E)-N-(4-Chloro-2-styrylphenyl)-4-methylbenzenesulfonamide (1d)**

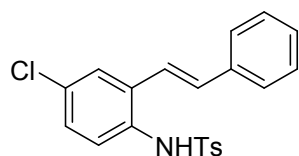

Following the general procedure **Method A**, **1d** was purified by silica gel chromatography (10% EtOAc/petroleum ether). A white solid (yield: 79%); m.p. 143-145 °C.  $R_f = 0.39$  (20% EtOAc/petroleum ether);  $^1\text{H NMR}$  (600 MHz,  $\text{CDCl}_3$ )  $\delta$  7.55 (d,  $J = 8.3$  Hz, 2H), 7.40 (d,  $J = 2.4$  Hz, 1H), 7.30 – 7.20 (m, 6H), 7.13 (dd,  $J = 8.6, 2.4$  Hz, 1H), 7.08 (d,  $J = 8.0$  Hz, 2H), 6.85 (s, 1H), 6.72 (q,  $J = 16.1$  Hz, 2H), 2.21 (s, 3H).  $^{13}\text{C NMR}$  (151 MHz,  $\text{CDCl}_3$ )  $\delta$  144.1, 136.3, 136.3, 135.1, 133.2, 132.9, 131.8, 129.8, 128.7, 128.43, 128.41, 128.2, 127.2, 126.9, 126.3, 121.5, 21.5. HRMS (ESI) calcd for  $\text{C}_{21}\text{H}_{18}\text{ClNNaO}_2\text{S}^+$  [ $\text{M} + \text{Na}^+$ ] 406.0639, found 406.0638.

**(E)-N-(5-Bromo-2-styrylphenyl)-4-methylbenzenesulfonamide (1e)**

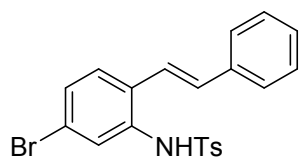

Following the general procedure **Method A**, **1e** was purified by silica gel chromatography (10% EtOAc/petroleum ether). A pale yellow solid (yield: 78%); m.p. 148-150 °C.  $R_f = 0.59$  (20% EtOAc/petroleum ether);  $^1\text{H NMR}$  (600 MHz,  $\text{CDCl}_3$ )  $\delta$  7.64 (d,  $J = 8.2$  Hz, 2H), 7.56 (s, 1H), 7.37 – 7.27 (m, 7H), 7.18 (d,  $J = 7.9$  Hz, 2H), 6.79 – 6.72 (m, 3H), 2.30 (s, 3H).  $^{13}\text{C NMR}$  (151 MHz,  $\text{CDCl}_3$ )  $\delta$  144.3, 136.4, 136.3, 134.4, 132.9, 131.9, 130.0, 129.8, 129.1, 128.7, 128.4, 127.8, 127.2, 126.7, 121.6, 121.5, 21.5. HRMS (ESI) calcd for  $\text{C}_{21}\text{H}_{18}\text{BrNNaO}_2\text{S}^+$  [ $\text{M} + \text{Na}^+$ ] 450.0134, found 450.0136.

**Methyl (E)-3-((4-methylphenyl)sulfonamido)-4-styrylbenzoate (1f)**

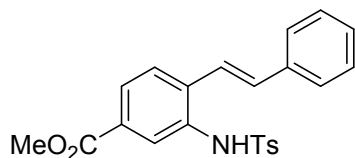

Following the general procedure **Method A**, **1f** was purified by silica gel chromatography (10% EtOAc/petroleum ether). A white solid (yield: 69%); m.p. 182-



184 °C.  $R_f$  = 0.35 (20% EtOAc/petroleum ether);  $^1\text{H}$  NMR (600 MHz,  $\text{CDCl}_3$ )  $\delta$  8.00 (d,  $J$  = 1.5 Hz, 1H), 7.88 (dd,  $J$  = 8.2, 1.4 Hz, 1H), 7.63 (d,  $J$  = 8.2 Hz, 2H), 7.57 (d,  $J$  = 8.2 Hz, 1H), 7.38 – 7.27 (m, 5H), 7.15 (d,  $J$  = 8.1 Hz, 2H), 6.96 – 6.85 (m, 3H), 3.91 (s, 3H), 2.27 (s, 3H).  $^{13}\text{C}$  NMR (151 MHz,  $\text{CDCl}_3$ )  $\delta$  166.2, 144.1, 137.9, 136.4, 136.3, 134.0, 133.4, 129.9, 129.8, 128.7, 128.6, 128.2, 128.1, 127.2, 127.0, 126.4, 121.9, 52.3, 21.4. HRMS (ESI) calcd for  $\text{C}_{23}\text{H}_{21}\text{NNaO}_4\text{S}^+$  [ $\text{M} + \text{Na}^+$ ] 430.1083, found 430.1086.

**(E)-4-Methyl-N-(2-styryl-4-(trifluoromethyl)phenyl)benzenesulfonamide (1g)**

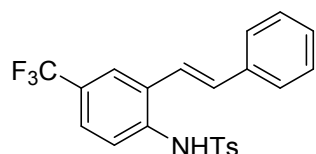

Following the general procedure **Method A**, **1g** was purified by silica gel chromatography (10% EtOAc/petroleum ether). A white solid (yield: 78%); m.p. 116-118 °C.  $R_f$  = 0.38 (20% EtOAc/petroleum ether);  $^1\text{H}$  NMR (600 MHz,  $\text{CDCl}_3$ )  $\delta$  7.72 – 7.65 (m, 3H), 7.54 (d,  $J$  = 8.4 Hz, 1H), 7.47 (dd,  $J$  = 8.5, 1.7 Hz, 1H), 7.34 (ddd,  $J$  = 25.2, 16.7, 7.1 Hz, 5H), 7.19 (d,  $J$  = 8.0 Hz, 2H), 7.11 (s, 1H), 6.86 (q,  $J$  = 16.1 Hz, 2H), 2.32 (s, 3H).  $^{13}\text{C}$  NMR (151 MHz,  $\text{CDCl}_3$ )  $\delta$  144.4, 136.6, 136.3, 136.10, 134.4, 132.3, 129.9, 128.8, 128.7, 128.3(q,  $^2J_{\text{C-F}}$  = 32.7 Hz), 127.2, 126.9, 125.0(q,  $^4J_{\text{C-F}}$  = 3.6 Hz), 124.7, 124.0(q,  $^4J_{\text{C-F}}$  = 3.7 Hz), 123.0, 121.2, 21.5. HRMS (ESI) calcd for  $\text{C}_{22}\text{H}_{18}\text{F}_3\text{NNaO}_2\text{S}^+$  [ $\text{M} + \text{Na}^+$ ] 440.0903, found 440.0905.

**(E)-N-(4-Cyano-2-styrylphenyl)-4-methylbenzenesulfonamide (1h)**

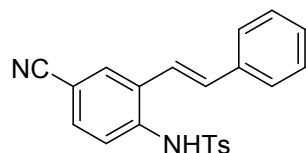

Following the general procedure **Method A**, **1h** was purified by silica gel chromatography (10% EtOAc/petroleum ether). A white solid (yield: 69%); m.p. 164-166 °C.  $R_f$  = 0.45 (20% EtOAc/petroleum ether);  $^1\text{H}$  NMR (600 MHz,  $\text{CDCl}_3$ )  $\delta$  7.69 (dd,  $J$  = 5.0, 3.2 Hz, 3H), 7.54 (d,  $J$  = 8.5 Hz, 1H), 7.49 (s, 1H), 7.45 (dd,  $J$  = 8.4, 1.8 Hz, 1H), 7.39 (d,  $J$  = 7.1 Hz, 2H), 7.31 (dt,  $J$  = 20.8, 7.0 Hz, 3H), 7.20 (d,  $J$  = 8.2 Hz,

2H), 6.85 (dd,  $J = 54.4, 16.0$  Hz, 2H), 2.32 (s, 3H).  $^{13}\text{C}$  NMR (151 MHz,  $\text{CDCl}_3$ )  $\delta$  144.7, 137.7, 136.0, 135.9, 135.2, 132.0, 131.6, 131.0, 130.0, 128.9, 128.8, 127.2, 127.0, 123.6, 120.3, 118.4, 109.3, 21.6. HRMS (ESI) calcd for  $\text{C}_{22}\text{H}_{18}\text{N}_2\text{NaO}_2\text{S}^+$  [ $\text{M} + \text{Na}^+$ ] 397.0981, found 397.0981.

**(E)-4-Methyl-N-(5-methyl-2-styrylphenyl)benzenesulfonamide (1i)**

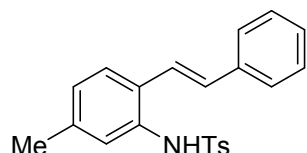

Following the general procedure **Method A**, **1i** was purified by silica gel chromatography (10% EtOAc/petroleum ether). A white solid (yield: 75%); m.p. 154-156 °C.  $R_f = 0.45$  (20% EtOAc/petroleum ether);  $^1\text{H}$  NMR (600 MHz,  $\text{CDCl}_3$ )  $\delta$  7.60 (d,  $J = 8.3$  Hz, 2H), 7.36 (d,  $J = 7.9$  Hz, 1H), 7.33 – 7.22 (m, 5H), 7.21 (s, 1H), 7.13 (d,  $J = 8.0$  Hz, 2H), 7.02 (d,  $J = 7.9$  Hz, 1H), 6.73 (q,  $J = 16.1$  Hz, 2H), 6.63 (s, 1H), 2.32 (s, 3H), 2.26 (s, 3H).  $^{13}\text{C}$  NMR (151 MHz,  $\text{CDCl}_3$ )  $\delta$  143.8, 138.6, 136.9, 136.7, 133.1, 131.2, 130.4, 129.6, 128.6, 128.0, 127.9, 127.5, 127.2, 126.6, 126.3, 122.6, 21.4, 21.2. HRMS (ESI) calcd for  $\text{C}_{22}\text{H}_{21}\text{NNaO}_2\text{S}^+$  [ $\text{M} + \text{Na}^+$ ] 386.1185, found 386.1186.

**(E)-4-Methyl-N-(4-methyl-2-styrylphenyl)benzenesulfonamide (1j)**

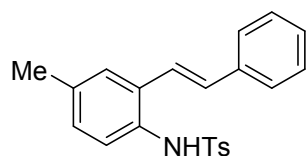

Following the general procedure **Method A**, **1j** was purified by silica gel chromatography (10% EtOAc/petroleum ether). A white solid (yield: 69%); m.p. 117-119 °C.  $R_f = 0.30$  (10% EtOAc/petroleum ether);  $^1\text{H}$  NMR (600 MHz,  $\text{CDCl}_3$ )  $\delta$  7.60 (d,  $J = 8.3$  Hz, 2H), 7.36 – 7.26 (m, 6H), 7.23 (d,  $J = 8.1$  Hz, 1H), 7.15 (d,  $J = 8.4$  Hz, 2H), 7.05 (dd,  $J = 8.1, 1.5$  Hz, 1H), 6.77 (s, 2H), 6.43 (s, 1H), 2.34 (s, 3H), 2.28 (s, 3H).  $^{13}\text{C}$  NMR (151 MHz,  $\text{CDCl}_3$ )  $\delta$  143.8, 137.1, 136.8, 136.7, 133.5, 131.7, 130.7, 129.6, 129.2, 128.6, 127.9, 127.4, 127.2, 126.9, 126.6, 122.9, 21.4, 21.1. HRMS (ESI) calcd for  $\text{C}_{22}\text{H}_{21}\text{NNaO}_2\text{S}^+$  [ $\text{M} + \text{Na}^+$ ] 386.1185, found 386.1186.

**(E)-4-Methyl-N-(3-methyl-2-styrylphenyl)benzenesulfonamide (1k)**

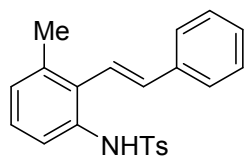

Following the general procedure **Method A**, **1k** was purified by silica gel chromatography (10% EtOAc/petroleum ether). A brown solid (yield: 75%); m.p. 128-130 °C.  $R_f = 0.65$  (20% EtOAc/petroleum ether);  $^1\text{H NMR}$  (600 MHz,  $\text{CDCl}_3$ )  $\delta$  7.63 (d,  $J = 8.3$  Hz, 2H), 7.49 (d,  $J = 8.2$  Hz, 1H), 7.36 (ddt,  $J = 21.4, 14.3, 7.2$  Hz, 5H), 7.23 (d,  $J = 8.1$  Hz, 2H), 7.16 (t,  $J = 7.9$  Hz, 1H), 6.99 (d,  $J = 7.6$  Hz, 1H), 6.85 (s, 1H), 6.58 (d,  $J = 16.8$  Hz, 1H), 6.28 (d,  $J = 16.8$  Hz, 1H), 2.41 (s, 3H), 2.21 (s, 3H).  $^{13}\text{C NMR}$  (151 MHz,  $\text{CDCl}_3$ )  $\delta$  143.8, 137.5, 136.8, 136.3, 136.1, 134.1, 129.9, 129.7, 128.8, 128.5, 127.8, 127.2, 126.8, 126.5, 122.8, 119.7, 21.6, 20.7. HRMS (ESI) calcd for  $\text{C}_{22}\text{H}_{21}\text{NNaO}_2\text{S}^+$  [ $\text{M} + \text{Na}^+$ ] 386.1185, found 386.1186.

**(E)-N-(4-Methoxy-2-styrylphenyl)-4-methylbenzenesulfonamide (1l)**

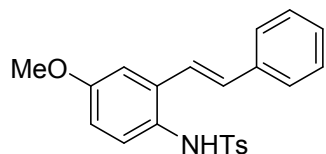

Following the general procedure **Method A**, **1l** was purified by silica gel chromatography (10% EtOAc/petroleum ether). A white solid (yield: 77%); m.p. 142-144 °C.  $R_f = 0.40$  (20% EtOAc/petroleum ether);  $^1\text{H NMR}$  (600 MHz,  $\text{CDCl}_3$ )  $\delta$  7.58 (d,  $J = 8.3$  Hz, 2H), 7.34 – 7.26 (m, 5H), 7.22 (d,  $J = 8.8$  Hz, 1H), 7.12 (d,  $J = 8.0$  Hz, 2H), 7.02 (d,  $J = 2.9$  Hz, 1H), 6.81 (d,  $J = 16.1$  Hz, 1H), 6.78 (dd,  $J = 8.8, 2.9$  Hz, 1H), 6.74 (d,  $J = 16.1$  Hz, 1H), 6.51 (s, 1H), 3.83 (s, 3H), 2.25 (s, 3H).  $^{13}\text{C NMR}$  (151 MHz,  $\text{CDCl}_3$ )  $\delta$  158.9, 143.7, 136.7, 136.6, 136.0, 131.6, 130.1, 129.6, 128.6, 128.1, 127.3, 126.7, 126.0, 123.0, 114.0, 110.9, 55.5, 21.4. HRMS (ESI) calcd for  $\text{C}_{22}\text{H}_{21}\text{NNaO}_3\text{S}^+$  [ $\text{M} + \text{Na}^+$ ] 402.1134, found 402.1136.

**(E)-N-(2-(4-Fluorostyryl)phenyl)-4-methylbenzenesulfonamide (1m)**

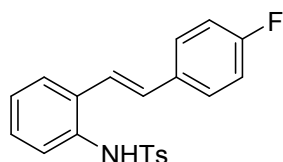

Following the general procedure **Method B**, **1m** was purified by silica gel chromatography (10% EtOAc/petroleum ether). A white solid (yield: 85%); m.p. 167-169 °C.  $R_f = 0.43$  (20% EtOAc/petroleum ether);  $^1\text{H NMR}$  (600 MHz,  $\text{CDCl}_3$ )  $\delta$  7.62 (d,  $J = 8.3$  Hz, 2H), 7.48 (dd,  $J = 6.6, 2.7$  Hz, 1H), 7.35 – 7.29 (m, 3H), 7.25 – 7.20 (m, 2H), 7.14 (d,  $J = 8.1$  Hz, 2H), 7.00 (t,  $J = 8.6$  Hz, 2H), 6.89 (s, 1H), 6.86 (d,  $J = 16.1$  Hz, 1H), 6.74 (d,  $J = 16.1$  Hz, 1H), 2.29 (s, 3H).  $^{13}\text{C NMR}$  (151 MHz,  $\text{CDCl}_3$ )  $\delta$  162.6 (d,  $^1J_{\text{C-F}} = 248.0$  Hz), 143.9, 136.6, 133.3, 133.1 (d,  $^4J_{\text{C-F}} = 3.2$  Hz), 130.7, 129.6, 128.3 (d,  $^3J_{\text{C-F}} = 8.0$  Hz), 128.3, 127.2, 127.1, 126.8, 126.4, 122.7, 115.5 (d,  $^2J_{\text{C-F}} = 21.8$  Hz), 100.0, 21.4. HRMS (ESI) calcd for  $\text{C}_{21}\text{H}_{18}\text{FNNaO}_2\text{S}^+$  [ $\text{M} + \text{Na}^+$ ] 390.0934, found 390.0936.

**(E)-N-(2-(4-Chlorostyryl)phenyl)-4-methylbenzenesulfonamide (1n)**

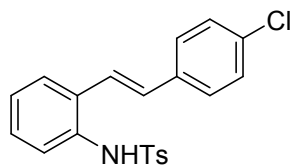

Following the general procedure **Method B**, **1n** was purified by silica gel chromatography (10% EtOAc/petroleum ether). A white solid (yield: 67%); m.p. 195-197 °C.  $R_f = 0.39$  (30% EtOAc/petroleum ether);  $^1\text{H NMR}$  (600 MHz, DMSO)  $\delta$  9.79 (s, 1H), 7.70 – 7.63 (m, 1H), 7.48 (d,  $J = 8.3$  Hz, 2H), 7.45 (d,  $J = 8.5$  Hz, 2H), 7.40 (d,  $J = 8.6$  Hz, 2H), 7.27 – 7.22 (m, 2H), 7.19 (d,  $J = 8.0$  Hz, 2H), 7.17 – 7.13 (m, 1H), 7.10 (d,  $J = 16.3$  Hz, 1H), 6.92 (d,  $J = 16.3$  Hz, 1H), 2.16 (s, 3H).  $^{13}\text{C NMR}$  (151 MHz, DMSO)  $\delta$  142.9, 137.1, 136.0, 133.9, 133.2, 131.9, 129.5, 128.5, 128.2, 128.1, 128.0, 126.9, 126.5, 125.5, 124.4, 20.8. HRMS (ESI) calcd for  $\text{C}_{21}\text{H}_{18}\text{ClNNaO}_2\text{S}^+$  [ $\text{M} + \text{Na}^+$ ] 406.0639, found 406.0638.

**(E)-N-(2-(3-Chlorostyryl)phenyl)-4-methylbenzenesulfonamide (1o)**

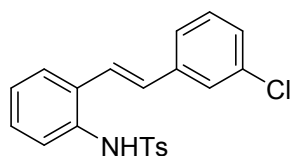

Following the general procedure **Method B**, **1o** was purified by silica gel chromatography (10% EtOAc/petroleum ether). A white solid (yield: 83%); m.p. 131-133 °C.  $R_f = 0.50$  (20% EtOAc/petroleum ether);  $^1\text{H NMR}$  (600 MHz,  $\text{CDCl}_3$ )  $\delta$  7.61 (d,  $J = 8.3$  Hz, 2H), 7.47 (dd,  $J = 7.4, 1.8$  Hz, 1H), 7.37 (dd,  $J = 7.7, 1.5$  Hz, 1H), 7.29 – 7.20 (m, 5H), 7.20 – 7.16 (m, 3H), 6.74 (dd,  $J = 52.3, 16.1$  Hz, 2H), 6.67 (s, 1H), 2.30 (s, 3H).  $^{13}\text{C NMR}$  (151 MHz,  $\text{CDCl}_3$ )  $\delta$  144.0, 138.7, 136.7, 134.6, 133.4, 133.1, 130.5, 129.8, 129.8, 128.8, 127.9, 127.6, 127.3, 127.2, 126.5, 126.3, 125.0, 124.3, 21.4. HRMS (ESI) calcd for  $\text{C}_{21}\text{H}_{18}\text{ClNNaO}_2\text{S}^+$  [ $\text{M} + \text{Na}^+$ ] 406.0639, found 406.0638.

**(E)-N-(2-(2-Chlorostyryl)phenyl)-4-methylbenzenesulfonamide (1p)**

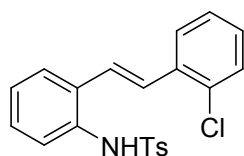

Following the general procedure **Method B**, **1p** was purified by silica gel chromatography (10% EtOAc/petroleum ether). A brown solid (yield: 81%); m.p. 162-164 °C.  $R_f = 0.45$  (10% EtOAc/petroleum ether);  $^1\text{H NMR}$  (600 MHz,  $\text{CDCl}_3$ )  $\delta$  7.60 (d,  $J = 8.2$  Hz, 2H), 7.58 – 7.54 (m, 1H), 7.44 (dd,  $J = 7.5, 1.8$  Hz, 1H), 7.36 (d,  $J = 7.6$  Hz, 1H), 7.32 (dd,  $J = 5.6, 3.7$  Hz, 1H), 7.26 – 7.18 (m, 5H), 7.14 (d,  $J = 8.1$  Hz, 2H), 6.91 (d,  $J = 16.1$  Hz, 1H), 6.74 (s, 1H), 2.30 (s, 3H).  $^{13}\text{C NMR}$  (151 MHz,  $\text{CDCl}_3$ )  $\delta$  144.0, 136.5, 134.9, 133.5, 133.4, 133.3, 129.8, 129.7, 129.0, 128.8, 127.9, 127.3, 127.2, 127.0, 126.9, 126.8, 126.8, 125.4, 21.5. HRMS (ESI) calcd for  $\text{C}_{21}\text{H}_{18}\text{ClNNaO}_2\text{S}^+$  [ $\text{M} + \text{Na}^+$ ] 406.0639, found 406.0638.

**Ethyl (E)-4-(2-((4-methylphenyl)sulfonamido)styryl)benzoate (1q)**

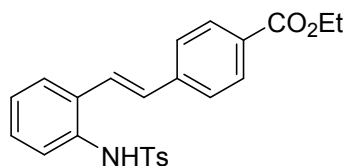

Following the general procedure **Method B**, **1q** was purified by silica gel

chromatography (10% EtOAc/petroleum ether). A white solid (yield: 82%); m.p. 152-153 °C.  $R_f = 0.40$  (20% EtOAc/petroleum ether);  $^1\text{H NMR}$  (600 MHz,  $\text{CDCl}_3$ )  $\delta$  7.97 (d,  $J = 8.3$  Hz, 2H), 7.61 (d,  $J = 8.3$  Hz, 2H), 7.52 (dd,  $J = 7.2, 2.0$  Hz, 1H), 7.40 – 7.32 (m, 3H), 7.26 – 7.22 (m, 2H), 7.14 (d,  $J = 8.1$  Hz, 2H), 7.01 (d,  $J = 16.1$  Hz, 1H), 6.89 (s, 1H), 6.80 (d,  $J = 16.1$  Hz, 1H), 4.39 (q,  $J = 7.1$  Hz, 2H), 2.27 (s, 3H), 1.41 (t,  $J = 7.1$  Hz, 3H).  $^{13}\text{C NMR}$  (151 MHz,  $\text{CDCl}_3$ )  $\delta$  166.4, 144.0, 141.1, 136.5, 133.5, 133.1, 130.7, 129.9, 129.7, 129.6, 128.9, 127.4, 127.3, 127.2, 126.5, 126.5, 125.4, 61.0, 21.5, 14.4. HRMS (ESI) calcd for  $\text{C}_{24}\text{H}_{23}\text{NNaO}_4\text{S}^+$  [ $\text{M} + \text{Na}^+$ ] 444.1240, found 444.1242.

**(E)-4-Methyl-N-(2-(4-(trifluoromethyl)styryl)phenyl)benzenesulfonamide (1r)**

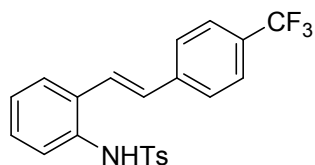

Following the general procedure **Method B**, **1r** was purified by silica gel chromatography (10% EtOAc/petroleum ether). A white solid (yield: 79%); m.p. 162-164 °C.  $R_f = 0.45$  (20% EtOAc/petroleum ether);  $^1\text{H NMR}$  (600 MHz,  $\text{CDCl}_3$ )  $\delta$  7.62 (d,  $J = 8.3$  Hz, 2H), 7.58 – 7.51 (m, 3H), 7.43 (d,  $J = 8.1$  Hz, 2H), 7.32 – 7.28 (m, 1H), 7.25 (dd,  $J = 5.8, 4.0$  Hz, 2H), 7.16 (d,  $J = 8.1$  Hz, 2H), 7.06 (d,  $J = 16.2$  Hz, 1H), 6.82 (d,  $J = 16.1$  Hz, 1H), 6.77 (s, 1H), 2.29 (s, 3H).  $^{13}\text{C NMR}$  (151 MHz,  $\text{CDCl}_3$ )  $\delta$  144.0, 140.3, 136.5, 133.5, 133.0, 130.2, 129.7, 129.6 (q,  $^2J_{\text{C-F}} = 31.8$  Hz), 129.0, 127.3, 127.3, 127.2, 126.8, 126.6, 125.6, 125.5 (q,  $^3J_{\text{C-F}} = 3.8$  Hz), 124.2 (q,  $^1J_{\text{C-F}} = 270.1$  Hz), 21.4. HRMS (ESI) calcd for  $\text{C}_{22}\text{H}_{18}\text{F}_3\text{NNaO}_2\text{S}^+$  [ $\text{M} + \text{Na}^+$ ] 440.0903, found 440.0905.

**(E)-4-Methyl-N-(2-(4-methylstyryl)phenyl)benzenesulfonamide (1s)**

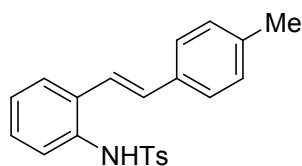

Following the general procedure **Method B**, **1s** was purified by silica gel

chromatography (10% EtOAc/petroleum ether). A white solid (yield: 77%); m.p. 159-161 °C.  $R_f$  = 0.33 (10% EtOAc/petroleum ether);  $^1\text{H}$  NMR (600 MHz,  $\text{CDCl}_3$ )  $\delta$  7.61 (d,  $J$  = 8.3 Hz, 2H), 7.46 (dd,  $J$  = 7.3, 1.9 Hz, 1H), 7.38 (dd,  $J$  = 7.7, 1.5 Hz, 1H), 7.22 (ddd,  $J$  = 16.1, 10.7, 5.0 Hz, 4H), 7.16 (dd,  $J$  = 15.2, 8.0 Hz, 4H), 6.80 – 6.67 (m, 2H), 6.50 (s, 1H), 2.37 (s, 3H), 2.31 (s, 3H).  $^{13}\text{C}$  NMR (151 MHz,  $\text{CDCl}_3$ )  $\delta$  138.2, 136.7, 133.9, 133.2, 133.2, 132.4, 129.7, 129.4, 128.2, 127.2, 127.0, 126.6, 126.6, 126.5, 121.6, 21.5, 21.3. HRMS (ESI) calcd for  $\text{C}_{22}\text{H}_{21}\text{NNaO}_2\text{S}^+$  [ $\text{M} + \text{Na}^+$ ] 386.1185, found 386.1186.

**(E)-4-Methyl-N-(2-(3-methylstyryl)phenyl)benzenesulfonamide (1t)**

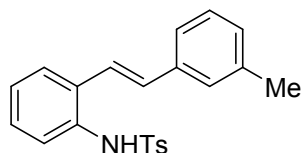

Following the general procedure **Method B**, **1t** was purified by silica gel chromatography (10% EtOAc/petroleum ether). A white solid (yield: 70%); m.p. 117-119 °C.  $R_f$  = 0.60 (30% EtOAc/petroleum ether);  $^1\text{H}$  NMR (400 MHz,  $\text{CDCl}_3$ )  $\delta$  7.61 (d,  $J$  = 8.3 Hz, 2H), 7.47 (dd,  $J$  = 7.2, 2.1 Hz, 1H), 7.39 (dd,  $J$  = 7.6, 1.7 Hz, 1H), 7.26 – 7.20 (m, 3H), 7.18 (d,  $J$  = 8.0 Hz, 2H), 7.10 (d,  $J$  = 7.2 Hz, 3H), 6.74 (d,  $J$  = 2.5 Hz, 2H), 6.47 (s, 1H), 2.38 (s, 3H), 2.31 (s, 3H).  $^{13}\text{C}$  NMR (101 MHz,  $\text{CDCl}_3$ )  $\delta$  144.0, 138.2, 136.6, 136.6, 133.2, 133.1, 132.6, 129.7, 129.0, 128.6, 128.4, 127.2, 127.2, 127.0, 126.6, 126.6, 123.9, 122.3, 21.5, 21.4. HRMS (ESI) calcd for  $\text{C}_{22}\text{H}_{21}\text{NNaO}_2\text{S}^+$  [ $\text{M} + \text{Na}^+$ ] 386.1191, found 386.1190.

**(E)-4-Methyl-N-(2-(2-methylstyryl)phenyl)benzenesulfonamide (1u)**

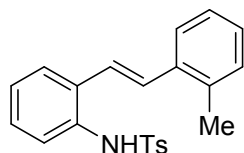

Following the general procedure **Method B**, **1u** was purified by silica gel chromatography (10% EtOAc/petroleum ether). A white solid (yield: 67%); m.p. 148-149 °C.  $R_f$  = 0.40 (20% EtOAc/petroleum ether);  $^1\text{H}$  NMR (400 MHz,  $\text{CDCl}_3$ )  $\delta$  7.62 (d,  $J$  = 8.3 Hz, 2H), 7.50 (dd,  $J$  = 6.5, 2.8 Hz, 1H), 7.43 – 7.36 (m, 1H), 7.28 (dd,  $J$  =

7.2, 4.6 Hz, 1H), 7.26 – 7.22 (m, 2H), 7.21 – 7.14 (m, 5H), 7.05 (d,  $J = 16.0$  Hz, 1H), 6.71 (d,  $J = 16.0$  Hz, 1H), 6.68 (s, 1H), 2.34 (s, 3H), 2.32 (s, 3H).  $^{13}\text{C}$  NMR (101 MHz,  $\text{CDCl}_3$ )  $\delta$  143.9, 136.7, 135.8, 135.7, 133.4, 133.3, 130.4, 130.1, 129.7, 128.4, 128.1, 127.2, 127.0, 126.8, 126.6, 126.2, 125.5, 123.9, 21.5, 19.9. HRMS (ESI) calcd for  $\text{C}_{22}\text{H}_{21}\text{NNaO}_2\text{S}^+$  [ $\text{M} + \text{Na}^+$ ] 386.1191, found 386.1192.

**(E)-N-(2-(4-Methoxystyryl)phenyl)-4-methylbenzenesulfonamide (1v)**

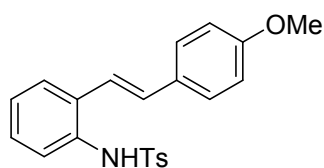

Following the general procedure **Method B**, **1v** was purified by silica gel chromatography (10% EtOAc/petroleum ether). A white solid (yield: 90%); m.p. 122-124 °C.  $R_f = 0.40$  (20% EtOAc/petroleum ether);  $^1\text{H}$  NMR (600 MHz,  $\text{CDCl}_3$ )  $\delta$  7.61 (d,  $J = 8.3$  Hz, 2H), 7.48 – 7.42 (m, 1H), 7.40 – 7.32 (m, 1H), 7.29 – 7.22 (m, 2H), 7.23 – 7.16 (m, 2H), 7.13 (d,  $J = 8.0$  Hz, 2H), 6.88 – 6.81 (m, 2H), 6.77 (s, 1H), 6.70 (s, 2H), 3.82 (s, 3H), 2.28 (s, 3H).  $^{13}\text{C}$  NMR (151 MHz,  $\text{CDCl}_3$ )  $\delta$  159.7, 143.8, 136.7, 133.5, 133.1, 131.7, 129.6, 128.0, 127.2, 126.9, 126.6, 126.4, 120.5, 114.1, 55.4, 21.5. HRMS (ESI) calcd for  $\text{C}_{22}\text{H}_{21}\text{NNaO}_3\text{S}^+$  [ $\text{M} + \text{Na}^+$ ] 402.1134, found 402.1136.

**(E)-N-(2-(3-Methoxystyryl)phenyl)-4-methylbenzenesulfonamide (1w)**

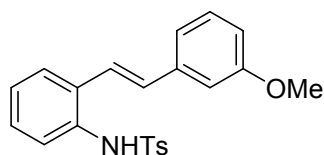

Following the general procedure **Method B**, **1w** was purified by silica gel chromatography (10% EtOAc/petroleum ether). A white solid (yield: 90%); m.p. 104-105 °C.  $R_f = 0.70$  (30% EtOAc/petroleum ether);  $^1\text{H}$  NMR (400 MHz,  $\text{CDCl}_3$ )  $\delta$  7.62 (d,  $J = 8.3$  Hz, 2H), 7.49 (dd,  $J = 7.0, 2.3$  Hz, 1H), 7.40 (dd,  $J = 7.3, 2.0$  Hz, 1H), 7.26 – 7.19 (m, 3H), 7.12 (d,  $J = 8.0$  Hz, 2H), 7.08 (s, 1H), 6.97 – 6.79 (m, 4H), 6.72 (d,  $J = 16.1$  Hz, 1H), 3.83 (s, 3H), 2.26 (s, 3H).  $^{13}\text{C}$  NMR (101 MHz,  $\text{CDCl}_3$ )  $\delta$  159.8, 143.9, 138.2, 136.5, 133.4, 133.3, 131.9, 129.7, 129.6, 128.4, 127.2, 126.5, 123.0,



119.5, 113.8, 111.9, 55.3, 21.5 (2 carbons are missing due to overlapping). HRMS (ESI) calcd for  $C_{22}H_{21}NNaO_3S^+$  [ $M + Na^+$ ] 402.1140, found 402.1142.

**(E)-N-(2-(2-Methoxystyryl)phenyl)-4-methylbenzenesulfonamide (1x)**

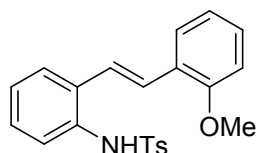

Following the general procedure **Method B**, **1x** was purified by silica gel chromatography (10% EtOAc/petroleum ether). A white solid (yield: 67%); m.p. 163-165 °C.  $R_f = 0.43$  (20% EtOAc/petroleum ether);  $^1H$  NMR (400 MHz,  $CDCl_3$ )  $\delta$  7.61 (d,  $J = 8.3$  Hz, 2H), 7.50 (dd,  $J = 7.0, 2.3$  Hz, 1H), 7.39 (dd,  $J = 7.5, 1.8$  Hz, 1H), 7.28 (dd,  $J = 6.6, 2.0$  Hz, 1H), 7.25 (s, 1H), 7.24 – 7.18 (m, 2H), 7.16 (dd,  $J = 12.1, 8.7$  Hz, 3H), 6.94 (t,  $J = 7.5$  Hz, 1H), 6.89 (d,  $J = 8.5$  Hz, 1H), 6.78 (d,  $J = 16.3$  Hz, 1H), 6.51 (s, 1H), 3.87 (s, 3H), 2.31 (s, 3H).  $^{13}C$  NMR (101 MHz,  $CDCl_3$ )  $\delta$  157.0, 143.9, 136.6, 133.4, 133.2, 129.7, 129.3, 128.2, 127.6, 127.2, 126.9, 126.8, 126.1, 125.7, 123.0, 120.7, 110.9, 55.5, 21.5. HRMS (ESI) calcd for  $C_{22}H_{21}NNaO_3S^+$  [ $M + Na^+$ ] 402.1134, found 402.1136.

**(E)-4-(2-((4-Methylphenyl)sulfonamido)styryl)phenyl acetate (1y)**

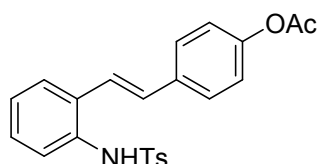

Following the general procedure **Method B**, **1y** was purified by silica gel chromatography (10% EtOAc/petroleum ether). A white solid (yield: 87%); m.p. 140-141 °C.  $R_f = 0.30$  (20% EtOAc/petroleum ether);  $^1H$  NMR (400 MHz,  $CDCl_3$ )  $\delta$  7.59 (d,  $J = 8.3$  Hz, 2H), 7.48 (dd,  $J = 6.8, 2.5$  Hz, 1H), 7.38 – 7.33 (m, 1H), 7.31 (d,  $J = 8.6$  Hz, 2H), 7.25 – 7.18 (m, 2H), 7.12 (d,  $J = 8.1$  Hz, 2H), 7.04 (d,  $J = 8.6$  Hz, 2H), 6.96 (s, 1H), 6.85 (d,  $J = 16.1$  Hz, 1H), 6.73 (d,  $J = 16.1$  Hz, 1H), 2.31 (s, 3H), 2.26 (s, 3H).  $^{13}C$  NMR (101 MHz,  $CDCl_3$ )  $\delta$  169.6, 150.3, 143.9, 136.5, 134.6, 133.3, 133.3, 130.7, 129.7, 128.5, 127.7, 127.2, 127.1, 127.1, 126.4, 123.0, 121.8, 21.5, 21.2.

HRMS (ESI) calcd for  $C_{23}H_{21}NNaO_4S^+$  [ $M + Na^+$ ] 430.1089, found 430.1088.

**(E)-4-Methyl-N-(2-(2-(thiophen-2-yl)vinyl)phenyl)benzenesulfonamide (1z)**

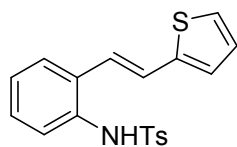

Following the general procedure **Method B**, **1z** was purified by silica gel chromatography (10% EtOAc/petroleum ether). A yellow solid (yield: 76%); m.p. 117-119 °C.  $R_f = 0.55$  (20% EtOAc/petroleum ether);  $^1H$  NMR (600 MHz,  $CDCl_3$ )  $\delta$  7.61 (d,  $J = 8.3$  Hz, 2H), 7.41 (td,  $J = 7.5, 1.5$  Hz, 2H), 7.25 – 7.18 (m, 3H), 7.15 (d,  $J = 8.0$  Hz, 2H), 6.98 (dd,  $J = 5.5, 2.5$  Hz, 2H), 6.87 (d,  $J = 15.9$  Hz, 1H), 6.72 (s, 1H), 6.59 (d,  $J = 15.9$  Hz, 1H), 2.30 (s, 3H).  $^{13}C$  NMR (151 MHz,  $CDCl_3$ )  $\delta$  143.9, 142.3, 136.4, 133.1, 133.0, 129.7, 128.4, 127.6, 127.2, 126.7, 126.3, 125.1, 125.0, 122.1, 21.5. HRMS (ESI) calcd for  $C_{19}H_{17}NNaO_2S_2^+$  [ $M + Na^+$ ] 378.0593, found 378.0596.

**(E)-4-Methyl-N-(2-(2-(naphthalen-2-yl)vinyl)phenyl)benzenesulfonamide (1aa)**

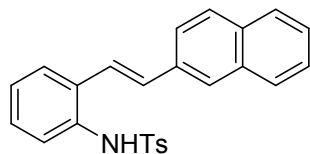

Following the general procedure **Method B**, **1aa** was purified by silica gel chromatography (10% EtOAc/petroleum ether). A white solid (yield: 86%); m.p. 138-140 °C.  $R_f = 0.50$  (20% EtOAc/petroleum ether);  $^1H$  NMR (600 MHz,  $CDCl_3$ )  $\delta$  7.81 – 7.77 (m, 2H), 7.75 (d,  $J = 8.6$  Hz, 1H), 7.68 (s, 1H), 7.63 (d,  $J = 8.3$  Hz, 2H), 7.55 – 7.51 (m, 1H), 7.49 (dd,  $J = 8.6, 1.6$  Hz, 1H), 7.48 – 7.43 (m, 2H), 7.41 – 7.36 (m, 1H), 7.27 – 7.20 (m, 2H), 7.10 (d,  $J = 8.3$  Hz, 2H), 6.95 (dd,  $J = 44.2, 16.1$  Hz, 2H), 6.85 (s, 1H), 2.19 (s, 3H).  $^{13}C$  NMR (151 MHz,  $CDCl_3$ )  $\delta$  143.9, 136.6, 134.3, 133.6, 133.4, 133.3, 133.2, 132.1, 129.7, 128.4, 128.3, 128.1, 127.7, 127.2, 127.2, 127.0, 127.0, 126.5, 126.4, 126.2, 123.6, 123.0, 21.4. HRMS (ESI) calcd for  $C_{25}H_{21}NNaO_2S^+$  [ $M + Na^+$ ] 422.1185, found 422.1186.

**(E)-N-(2-Styrylphenyl)methanesulfonamide (1ab)**

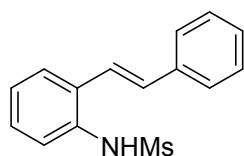

Following the general procedure **Method A** using methanesulfonyl chloride as the sulfonylation reagent, **1ab** was purified by silica gel chromatography (10% EtOAc/petroleum ether). A white solid (yield: 81%); m.p. 110-112 °C.  $R_f$  = 0.31 (20% EtOAc/petroleum ether);  $^1\text{H}$  NMR (600 MHz,  $\text{CDCl}_3$ )  $\delta$  7.64 (dd,  $J$  = 7.6, 1.2 Hz, 1H), 7.54 (d,  $J$  = 7.9 Hz, 2H), 7.50 (dd,  $J$  = 7.9, 1.0 Hz, 1H), 7.39 (t,  $J$  = 7.6 Hz, 2H), 7.36 – 7.26 (m, 4H), 7.06 (d,  $J$  = 16.1 Hz, 1H), 6.51 (s, 1H), 3.02 (s, 3H).  $^{13}\text{C}$  NMR (151 MHz,  $\text{CDCl}_3$ )  $\delta$  136.8, 133.5, 132.9, 132.5, 128.8, 128.7, 128.3, 127.0, 126.9, 126.9, 125.1, 122.8, 40.0. HRMS (ESI) calcd for  $\text{C}_{15}\text{H}_{15}\text{NNaO}_2\text{S}^+$  [ $\text{M} + \text{Na}^+$ ] 296.0716, found 296.0718.

**(E)-4-Chloro-N-(2-styrylphenyl)benzenesulfonamide (1ac)**

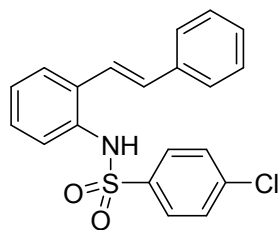

Following the general procedure **Method A** using 4-chlorobenzenesulfonyl chloride as the sulfonylation reagent, **1ac** was purified by silica gel chromatography (10% EtOAc/petroleum ether). A white solid (yield: 80%); m.p. 129-131 °C.  $R_f$  = 0.50 (20% EtOAc/petroleum ether);  $^1\text{H}$  NMR (600 MHz,  $\text{CDCl}_3$ )  $\delta$  7.64 – 7.61 (m, 2H), 7.51 – 7.47 (m, 1H), 7.37 – 7.30 (m, 5H), 7.30 – 7.26 (m, 3H), 7.26 – 7.22 (m, 2H), 6.88 (d,  $J$  = 16.1 Hz, 1H), 6.82 (s, 1H), 6.75 (d,  $J$  = 16.1 Hz, 1H).  $^{13}\text{C}$  NMR (151 MHz,  $\text{CDCl}_3$ )  $\delta$  139.6, 137.9, 136.6, 133.6, 132.8, 132.5, 129.3, 128.7, 128.6, 128.5, 128.3, 127.6, 127.0, 126.8, 126.7, 122.6. HRMS (ESI) calcd for  $\text{C}_{20}\text{H}_{16}\text{ClNNaO}_2\text{S}^+$  [ $\text{M} + \text{Na}^+$ ] 392.0482, found 392.0483.

**tert-butyl (E)-(2-styrylphenyl)carbamate (1ad)**

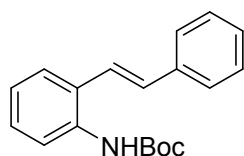

Following the general procedure **Method A** using (Boc)<sub>2</sub>O in ClCH<sub>2</sub>CH<sub>2</sub>Cl in place of *p*-TsCl in pyridine, **1ad** was purified by silica gel chromatography (10% EtOAc/petroleum ether). A white solid (yield: 73%); mp 130-132 °C. *R*<sub>f</sub> = 0.50 (10% EtOAc/petroleum ether); <sup>1</sup>H NMR (400 MHz, CDCl<sub>3</sub>) δ 7.80 (s, 1H), 7.52 (t, *J* = 8.5 Hz, 3H), 7.39 (t, *J* = 6.9 Hz, 2H), 7.36 – 7.26 (m, 2H), 7.14 (dd, *J* = 20.9, 13.2 Hz, 2H), 7.00 (d, *J* = 16.0 Hz, 1H), 6.45 (s, 1H), 1.54 (s, 9H). <sup>13</sup>C NMR (101 MHz, CDCl<sub>3</sub>) δ 153.2, 137.2, 135.4, 132.4, 128.8, 128.4, 128.1, 126.9, 126.7, 124.3, 123.6, 122.1, 80.7, 28.4. HRMS (ESI) calcd for C<sub>19</sub>H<sub>21</sub>NNaO<sub>2</sub><sup>+</sup> [M + Na<sup>+</sup>] 318.1465, found 318.1468.

**(E)-4-Methyl-N-(5-methyl-2-(4-methylstyryl)phenyl)benzenesulfonamide(1ae)**

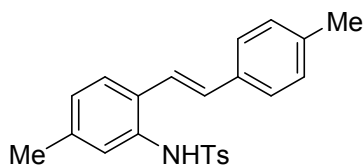

Following the general procedure **Method B**, **1ae** was purified by silica gel chromatography (10% EtOAc/petroleum ether). A white solid (yield: 88%); m.p. 158-160 °C. *R*<sub>f</sub> = 0.70 (20% EtOAc/petroleum ether); <sup>1</sup>H NMR (400 MHz, CDCl<sub>3</sub>) δ 7.61 (d, *J* = 8.3 Hz, 2H), 7.35 (d, *J* = 8.0 Hz, 1H), 7.23 (s, 1H), 7.15 (q, *J* = 8.1 Hz, 6H), 7.03 (d, *J* = 8.2 Hz, 1H), 6.66 (q, *J* = 16.1 Hz, 2H), 6.50 (s, 1H), 2.36 (s, 3H), 2.33 (s, 3H), 2.29 (s, 3H). <sup>13</sup>C NMR (101 MHz, CDCl<sub>3</sub>) δ 143.9, 138.5, 137.9, 136.7, 134.1, 132.9, 131.3, 130.4, 129.6, 129.3, 128.0, 127.3, 127.2, 126.5, 126.3, 121.5, 21.5, 21.3, 21.2. HRMS (ESI) calcd for C<sub>23</sub>H<sub>23</sub>NNaO<sub>2</sub>S<sup>+</sup> [M + Na<sup>+</sup>] 400.1347, found 400.1348.

**(E)-N-(2-(4-Methoxystyryl)-5-methylphenyl)-4-methylbenzenesulfonamide(1af)**

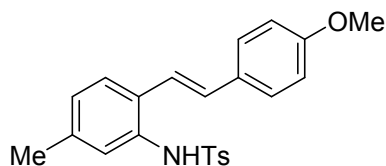

Following the general procedure **Method B**, **1af** was purified by silica gel

chromatography (10% EtOAc/petroleum ether). A white solid (yield: 83%); m.p. 132-134 °C.  $R_f$  = 0.40 (20% EtOAc/petroleum ether);  $^1\text{H}$  NMR (400 MHz,  $\text{CDCl}_3$ )  $\delta$  7.61 (d,  $J$  = 8.3 Hz, 2H), 7.33 (d,  $J$  = 8.0 Hz, 1H), 7.19 (t,  $J$  = 9.1 Hz, 5H), 7.02 (d,  $J$  = 7.8 Hz, 1H), 6.86 (d,  $J$  = 8.7 Hz, 2H), 6.67 (d,  $J$  = 16.1 Hz, 1H), 6.51 (d,  $J$  = 16.1 Hz, 1H), 6.35 (s, 1H), 3.84 (s, 3H), 2.33 (s, 3H), 2.30 (s, 3H).  $^{13}\text{C}$  NMR (101 MHz,  $\text{CDCl}_3$ )  $\delta$  159.5, 143.9, 138.3, 136.7, 132.8, 131.0, 130.4, 129.6, 129.6, 127.9, 127.8, 127.2, 127.2, 126.2, 120.3, 114.1, 55.4, 21.5, 21.2. HRMS (ESI) calcd for  $\text{C}_{23}\text{H}_{23}\text{NNaO}_3\text{S}^+$  [ $\text{M} + \text{Na}^+$ ] 416.1291, found 416.1293.

**(*E*)-*N*-(2-(4-Methoxystyryl)phenyl)methanesulfonamide (1ag)**

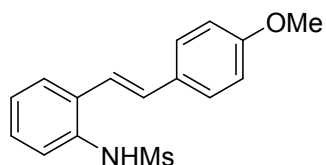

Following the general procedure **Method B** using methanesulfonyl chloride as the sulfonylation reagent, **1ag** was purified by silica gel chromatography (10% EtOAc/petroleum ether). A white solid (yield: 81%); m.p. 115-117 °C.  $R_f$  = 0.35 (30% EtOAc/petroleum ether);  $^1\text{H}$  NMR (400 MHz,  $\text{CDCl}_3$ )  $\delta$  7.62 (dd,  $J$  = 7.0, 2.3 Hz, 1H), 7.53 – 7.46 (m, 3H), 7.28 (dd,  $J$  = 4.0, 2.5 Hz, 1H), 7.21 (d,  $J$  = 16.1 Hz, 1H), 7.00 (d,  $J$  = 16.0 Hz, 1H), 6.91 (d,  $J$  = 8.8 Hz, 2H), 6.81 (s, 1H), 3.83 (s, 3H), 3.00 (s, 3H).  $^{13}\text{C}$  NMR (101 MHz,  $\text{CDCl}_3$ )  $\delta$  159.9, 133.2, 132.7, 132.5, 129.5, 128.4, 128.2, 126.9, 126.8, 125.0, 120.4, 114.3, 55.4, 40.0. HRMS (ESI) calcd for  $\text{C}_{16}\text{H}_{17}\text{NNaO}_3\text{S}^+$  [ $\text{M} + \text{Na}^+$ ] 326.0827, found 326.0828.

**(*E*)-*N*-(2-styrylphenyl)acetamide (1ah)**

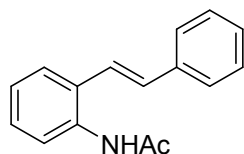

Following the general procedure **Method A** using AcCl in place of *p*-TsCl, **1ah** was purified by silica gel chromatography (10% EtOAc/petroleum ether). A white solid (yield: 84%); mp 140-141 °C.  $R_f$  = 0.58 (10% EtOAc/petroleum ether);  $^1\text{H}$  NMR (600

MHz, DMSO)  $\delta$  9.63 (s, 1H), 7.76 (d,  $J = 7.7$  Hz, 1H), 7.61 (d,  $J = 7.6$  Hz, 2H), 7.49 (d,  $J = 7.9$  Hz, 1H), 7.39 (dd,  $J = 19.9, 12.0$  Hz, 3H), 7.29 (t,  $J = 7.4$  Hz, 1H), 7.26 (t,  $J = 7.5$  Hz, 1H), 7.23 – 7.15 (m, 2H), 2.12 (s, 3H).  $^{13}\text{C}$  NMR (151 MHz, DMSO)  $\delta$  168.6, 137.3, 135.6, 130.8, 129.5, 128.7, 127.7, 127.6, 126.6, 126.1, 125.4, 125.2, 124.1, 23.4. HRMS (ESI) calcd for  $\text{C}_{16}\text{H}_{15}\text{NNaO}^+$  [ $\text{M} + \text{Na}^+$ ] 260.1046, found 260.1048.

#### 4-methyl-*N*-(2-vinylphenyl)benzenesulfonamide (1ai)

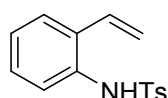

Following the general procedure **Method B**, **1ai** was purified by silica gel chromatography (10% EtOAc/petroleum ether). A white solid (yield: 76%); mp 114-116 °C.  $R_f = 0.20$  (10% EtOAc/petroleum ether);  $^1\text{H}$  NMR (600 MHz,  $\text{CDCl}_3$ )  $\delta$  7.61 (d,  $J = 8.3$  Hz, 2H), 7.36 (dd,  $J = 7.6, 1.3$  Hz, 1H), 7.31 (d,  $J = 7.9$  Hz, 1H), 7.20 (dd,  $J = 13.2, 4.9$  Hz, 3H), 7.15 (t,  $J = 7.4$  Hz, 1H), 6.71 (s, 1H), 6.58 (dd,  $J = 17.4, 11.0$  Hz, 1H), 5.50 (d,  $J = 17.4$  Hz, 1H), 5.25 (d,  $J = 11.0$  Hz, 1H), 2.38 (s, 3H).  $^{13}\text{C}$  NMR (151 MHz,  $\text{CDCl}_3$ )  $\delta$  143.9, 136.5, 133.2, 132.8, 131.6, 129.6, 128.6, 127.3, 126.9, 126.5, 125.0, 118.1, 21.6. HRMS (ESI) calcd for  $\text{C}_{15}\text{H}_{15}\text{NNaO}_2\text{S}^+$  [ $\text{M} + \text{Na}^+$ ] 296.0716, found 296.0718.

#### (*E*)-4-methyl-*N*-(2-(pent-1-en-1-yl)phenyl)benzenesulfonamide (1aj)

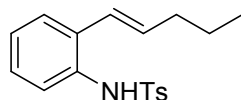

Following the general procedure **Method A**, **1aj** was purified by silica gel chromatography (10% EtOAc/petroleum ether). A white solid (yield: 68%); mp 76-78 °C.  $R_f = 0.43$  (10% EtOAc/petroleum ether);  $^1\text{H}$  NMR (600 MHz,  $\text{CDCl}_3$ )  $\delta$  7.61 (d,  $J = 8.2$  Hz, 2H), 7.36 (d,  $J = 7.9$  Hz, 1H), 7.27 (d,  $J = 7.8$  Hz, 1H), 7.20 (d,  $J = 8.1$  Hz, 2H), 7.16 (t,  $J = 7.5$  Hz, 1H), 7.11 (t,  $J = 7.3$  Hz, 1H), 6.62 (s, 1H), 6.11 (d,  $J = 15.7$  Hz, 1H), 5.92 (dt,  $J = 15.6, 6.9$  Hz, 1H), 2.37 (s, 3H), 2.13 – 1.93 (m, 2H), 1.51 – 1.31 (m, 2H), 0.91 (t,  $J = 7.4$  Hz, 3H).  $^{13}\text{C}$  NMR (151 MHz,  $\text{CDCl}_3$ )  $\delta$  143.7, 136.6, 135.7,

132.9, 132.7, 129.6, 127.7, 127.2, 127.1, 126.3, 124.7, 124.0, 35.2, 22.2, 21.5, 13.7.  
HRMS (ESI) calcd for  $C_{18}H_{21}NNaO_2S^+$  [ $M + Na^+$ ] 338.1185, found 338.1187.

**(E)-4-methyl-N-(2-(3-phenylprop-1-en-1-yl)phenyl)benzenesulfonamide(1ak)**

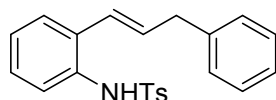

Following the general procedure **Method A**, **1ak** was purified by silica gel chromatography (10% EtOAc/petroleum ether). A white solid (yield: 75%); mp 125-127 °C.  $R_f = 0.28$  (20% EtOAc/petroleum ether);  $^1H$  NMR (600 MHz,  $CDCl_3$ )  $\delta$  7.59 (d,  $J = 8.3$  Hz, 2H), 7.41 (d,  $J = 8.0$  Hz, 1H), 7.32 – 7.27 (m, 4H), 7.25 – 7.20 (m, 2H), 7.18 – 7.12 (m, 4H), 6.57 (s, 1H), 6.28 (d,  $J = 15.9$  Hz, 1H), 6.09 (dt,  $J = 15.9, 6.4$  Hz, 1H), 3.25 (dd,  $J = 6.3, 1.2$  Hz, 2H), 2.36 (s, 3H).  $^{13}C$  NMR (151 MHz,  $CDCl_3$ )  $\delta$  143.8, 136.8, 136.7, 134.9, 132.5, 132.0, 130.5, 129.6, 128.6, 127.7, 127.6, 127.2, 127.1, 126.28, 126.26, 124.3, 35.1, 21.5. HRMS (ESI) calcd for  $C_{22}H_{21}NNaO_2S^+$  [ $M + Na^+$ ] 386.1185, found 386.1188.

**(E)-N-methyl-2-styrylaniline (1al)**

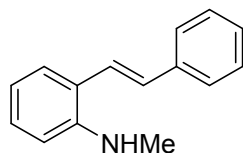

Following the general procedure **Method A** using MeI in place of *p*-TsCl, **1al** was purified by silica gel chromatography (10% EtOAc/petroleum ether). A yellow oil (yield: 45%).  $R_f = 0.65$  (10% EtOAc/petroleum ether);  $^1H$  NMR (400 MHz,  $CDCl_3$ )  $\delta$  7.53 (d,  $J = 7.8$  Hz, 2H), 7.39 (dd,  $J = 13.5, 7.4$  Hz, 3H), 7.29 (d,  $J = 7.9$  Hz, 1H), 7.24 (s, 1H), 7.17 (d,  $J = 16.0$  Hz, 1H), 6.98 (d,  $J = 16.0$  Hz, 1H), 6.80 (t,  $J = 7.4$  Hz, 1H), 6.71 (d,  $J = 8.1$  Hz, 1H), 4.16 (s, 1H), 2.92 (s, 3H).  $^{13}C$  NMR (101 MHz,  $CDCl_3$ )  $\delta$  146.5, 137.7, 130.9, 129.1, 128.7, 127.6, 127.3, 126.5, 124.4, 124.1, 117.6, 110.5, 31.0. HRMS (ESI) calcd for  $C_{15}H_{15}NNa^+$  [ $M + Na^+$ ] 232.1097, found 232.1096.

**(E)-N-benzyl-2-styrylaniline (1am)**

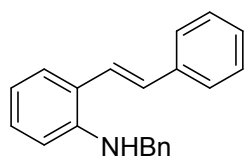

Following the general procedure **Method A** using BnCl in place of *p*-TsCl, **1am** was purified by silica gel chromatography (10% EtOAc/petroleum ether). A yellow oil (yield: 48%).  $R_f = 0.65$  (10% EtOAc/petroleum ether);  $^1\text{H NMR}$  (600 MHz,  $\text{CDCl}_3$ )  $\delta$  7.41 (d,  $J = 7.4$  Hz, 2H), 7.35 – 7.29 (m, 3H), 7.26 (t,  $J = 7.0$  Hz, 4H), 7.21 – 7.12 (m, 3H), 7.08 (dd,  $J = 14.5, 6.5$  Hz, 2H), 6.90 (d,  $J = 16.0$  Hz, 1H), 6.70 (t,  $J = 7.2$  Hz, 1H), 6.60 (d,  $J = 7.8$  Hz, 1H), 4.31 (s, 2H).  $^{13}\text{C NMR}$  (151 MHz,  $\text{CDCl}_3$ )  $\delta$  145.4, 139.1, 137.7, 131.1, 129.0, 128.7, 127.62, 127.56, 127.5, 127.3, 126.5, 124.4, 117.9, 111.5, 48.6. HRMS (ESI) calcd for  $\text{C}_{21}\text{H}_{19}\text{NNa}^+$  [ $\text{M} + \text{Na}^+$ ] 308.1410, found 308.1416.

### (*E*)-2-styrylphenol (**1an**)

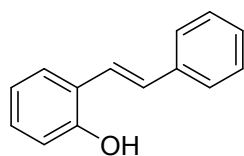

Following the general procedure **Method A** step 1, **1an** was purified by silica gel chromatography (10% EtOAc/petroleum ether). A yellow solid (yield: 82%); mp 140–142 °C.  $R_f = 0.55$  (10% EtOAc/petroleum ether);  $^1\text{H NMR}$  (400 MHz,  $\text{CDCl}_3$ )  $\delta$  7.54 (d,  $J = 7.5$  Hz, 3H), 7.39 (d,  $J = 4.7$  Hz, 1H), 7.38 – 7.32 (m, 2H), 7.27 (d,  $J = 13.9$  Hz, 1H), 7.18 – 7.08 (m, 2H), 6.96 (t,  $J = 7.5$  Hz, 1H), 6.81 (d,  $J = 8.0$  Hz, 1H), 4.96 (s, 1H).  $^{13}\text{C NMR}$  (101 MHz,  $\text{CDCl}_3$ )  $\delta$  153.0, 137.6, 130.2, 128.7, 127.7, 127.3, 126.6, 124.7, 123.0, 121.2, 116.0. HRMS (ESI) calcd for  $\text{C}_{14}\text{H}_{12}\text{NaO}^+$  [ $\text{M} + \text{Na}^+$ ] 219.0780, found 219.0785.

## 3. General Procedure for the Synthesis of 3-Unsubstituted Indoles Derivatives **2** (**2a-2ac**):

To a solution of substrate **1** (0.5 mmol) in DMSO (1 mL) was slowly added  $\text{SOCl}_2$  (1.5 mmol, 179 mg) at 25 °C. The mixture was kept stirring at 25 °C until TLC indicated that total consumption of substrate **1**. Then the reaction mixture was



quenched with saturated aq. NaHCO<sub>3</sub> solution (5 mL) and water (20 mL), extracted with EtOAc (3 × 20 mL), combined the organic phase then evaporated the solvent, purified by flash column chromatography (5% EtOAc/petroleum ether) to afford the desired compound **2**.

#### 4. Spectroscopic Data of 3-Unsubstituted Indoles Derivatives **2** (2a-ac):

##### 2-Phenyl-1-tosyl-1*H*-indole (**2a**)

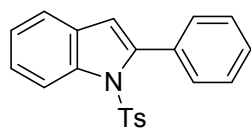

Following the general procedure, **2a** was purified by silica gel chromatography (5% EtOAc/petroleum ether). A white solid (159 mg, 92%); m.p. 145-147 °C.  $R_f = 0.59$  (10% EtOAc/petroleum ether); <sup>1</sup>H NMR (600 MHz, CDCl<sub>3</sub>) δ 8.31 (d,  $J = 8.4$  Hz, 1H), 7.52 – 7.47 (m, 2H), 7.45 – 7.39 (m, 4H), 7.37 – 7.32 (m, 1H), 7.26 – 7.23 (m, 2H), 7.02 (d,  $J = 8.3$  Hz, 2H), 6.53 (s, 1H), 2.27 (s, 3H). <sup>13</sup>C NMR (151 MHz, CDCl<sub>3</sub>) δ 144.5, 142.2, 138.3, 134.8, 132.5, 130.6, 130.4, 129.2, 128.7, 127.5, 126.8, 124.8, 124.3, 120.7, 116.7, 113.6, 21.5. HRMS (ESI) calcd for C<sub>21</sub>H<sub>17</sub>NNaO<sub>2</sub>S<sup>+</sup> [M + Na<sup>+</sup>] 370.0878, found 370.0882.

##### 6-Fluoro-2-phenyl-1-tosyl-1*H*-indole (**2b**)

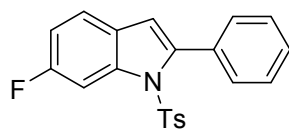

Following the general procedure, **2b** was purified by silica gel chromatography (5% EtOAc/petroleum ether). A white solid (168 mg, 92%); m.p. 103-105 °C.  $R_f = 0.61$  (10% EtOAc/petroleum ether); <sup>1</sup>H NMR (600 MHz, CDCl<sub>3</sub>) δ 8.06 (dd,  $J = 10.4, 2.1$  Hz, 1H), 7.49 – 7.39 (m, 5H), 7.36 (dd,  $J = 8.5, 5.4$  Hz, 1H), 7.27 (d,  $J = 8.4$  Hz, 2H), 7.06 (d,  $J = 8.1$  Hz, 2H), 7.02 (td,  $J = 8.8, 2.3$  Hz, 1H), 6.49 (s, 1H), 2.30 (s, 3H). <sup>13</sup>C NMR (151 MHz, CDCl<sub>3</sub>) δ 161.7, 160.1, 144.8, 142.4(d,  $^4J_{C-F} = 4.3$  Hz), 138.6(d,  $^3J_{C-F} = 12.5$  Hz), 134.7, 132.1, 130.4, 129.3, 128.7, 127.5, 126.9, 126.7, 121.3(d,  $^3J_{C-F} = 9.7$  Hz), 112.8, 112.6(d,  $^2J_{C-F} = 24.1$  Hz), 104.0(d,  $^2J_{C-F} = 28.6$  Hz), 21.5. HRMS (ESI)

calcd for C<sub>21</sub>H<sub>16</sub>FNNaO<sub>2</sub>S<sup>+</sup> [M + Na<sup>+</sup>] 388.0783, found 388.0782.

### 5-Fluoro-2-phenyl-1-tosyl-1H-indole (2c)

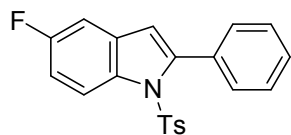

Following the general procedure, **2c** was purified by silica gel chromatography (5% EtOAc/petroleum ether). A pale yellow solid (165 mg, 91%); m.p. 113-115 °C.  $R_f$  = 0.57 (10% EtOAc/petroleum ether); <sup>1</sup>H NMR (600 MHz, CDCl<sub>3</sub>) δ 8.25 (dd,  $J$  = 8.9, 4.5 Hz, 1H), 7.51 – 7.39 (m, 5H), 7.24 (d,  $J$  = 8.4 Hz, 2H), 7.12 – 7.02 (m, 4H), 6.50 (s, 1H), 2.30 (s, 3H). <sup>13</sup>C NMR (151 MHz, CDCl<sub>3</sub>) δ 160.2(d, <sup>1</sup> $J_{C-F}$  = 239.7 Hz), 144.7, 144.0, 134.6, 134.5, 132.1, 131.6(d, <sup>3</sup> $J_{C-F}$  = 10.0 Hz), 130.3, 129.3, 128.9, 127.6, 126.8, 117.9(d, <sup>3</sup> $J_{C-F}$  = 9.2 Hz), 113.2(d, <sup>4</sup> $J_{C-F}$  = 3.8 Hz), 112.5(d, <sup>2</sup> $J_{C-F}$  = 25.0 Hz), 106.3(d, <sup>2</sup> $J_{C-F}$  = 23.8 Hz), 21.5. HRMS (ESI) calcd for C<sub>21</sub>H<sub>16</sub>FNNaO<sub>2</sub>S<sup>+</sup> [M + Na<sup>+</sup>] 388.0783, found 388.0781.

### 5-Chloro-2-phenyl-1-tosyl-1H-indole (2d)

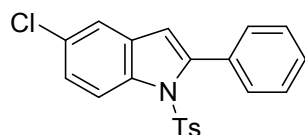

Following the general procedure, **2d** was purified by silica gel chromatography (5% EtOAc/petroleum ether). A white solid (165 mg, 83%); m.p. 142-143 °C.  $R_f$  = 0.61 (10% EtOAc/petroleum ether); <sup>1</sup>H NMR (400 MHz, CDCl<sub>3</sub>) δ 8.24 (d,  $J$  = 8.9 Hz, 1H), 7.52 – 7.39 (m, 6H), 7.31 (dd,  $J$  = 8.9, 2.1 Hz, 1H), 7.24 (d,  $J$  = 8.4 Hz, 2H), 7.06 (d,  $J$  = 8.1 Hz, 2H), 6.48 (s, 1H), 2.30 (s, 3H). <sup>13</sup>C NMR (101 MHz, CDCl<sub>3</sub>) δ 144.9, 143.6, 136.6, 134.4, 131.9, 131.8, 130.4, 130.0, 129.4, 129.0, 127.6, 126.8, 124.9, 120.3, 117.7, 112.7, 21.6. HRMS (ESI) calcd for C<sub>21</sub>H<sub>16</sub>ClNNaO<sub>2</sub>S<sup>+</sup> [M + Na<sup>+</sup>] 404.0488, found 404.0485.

### 6-Bromo-2-phenyl-1-tosyl-1H-indole (2e)

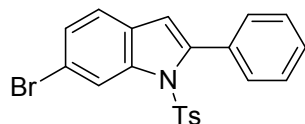

Following the general procedure, **2e** was purified by silica gel chromatography (5% EtOAc/petroleum ether). A white solid (186 mg, 87%); m.p. 156-157 °C.  $R_f = 0.46$  (10% EtOAc/petroleum ether);  $^1\text{H NMR}$  (600 MHz,  $\text{CDCl}_3$ )  $\delta$  8.51 (s, 1H), 7.48 – 7.36 (m, 6H), 7.30 (d,  $J = 8.3$  Hz, 1H), 7.25 (d,  $J = 8.2$  Hz, 2H), 7.06 (d,  $J = 8.2$  Hz, 2H), 6.48 (s, 1H), 2.30 (s, 3H).  $^{13}\text{C NMR}$  (151 MHz,  $\text{CDCl}_3$ )  $\delta$  144.9, 142.6, 138.9, 134.7, 131.9, 130.4, 129.4, 129.3, 128.9, 127.6, 127.5, 126.9, 121.7, 119.6, 118.3, 112.8, 21.6. HRMS (ESI) calcd for  $\text{C}_{21}\text{H}_{16}\text{BrNNaO}_2\text{S}^+$  [ $\text{M} + \text{Na}^+$ ] 449.9983, found 449.9981.

#### Methyl 2-phenyl-1-tosyl-1H-indole-6-carboxylate (**2f**)

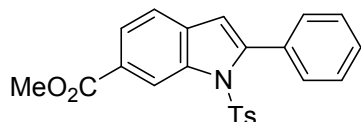

Following the general procedure, **2f** was purified by silica gel chromatography (5% EtOAc/petroleum ether). A white solid (181 mg, 86%); m.p. 165-166 °C.  $R_f = 0.21$  (10% EtOAc/petroleum ether);  $^1\text{H NMR}$  (600 MHz,  $\text{CDCl}_3$ )  $\delta$  9.01 (s, 1H), 7.97 (d,  $J = 8.1$  Hz, 1H), 7.45 (ddd,  $J = 20.2, 15.4, 7.5$  Hz, 6H), 7.30 – 7.21 (m, 2H), 7.04 (d,  $J = 8.2$  Hz, 2H), 6.56 (s, 1H), 3.98 (s, 3H), 2.27 (s, 3H).  $^{13}\text{C NMR}$  (151 MHz,  $\text{CDCl}_3$ )  $\delta$  167.4, 145.2, 144.9, 137.7, 134.6, 134.2, 131.8, 130.4, 129.4, 129.1, 127.6, 126.9, 126.5, 125.6, 120.4, 118.3, 113.1, 52.3, 21.6. HRMS (ESI) calcd for  $\text{C}_{23}\text{H}_{19}\text{NNaO}_4\text{S}^+$  [ $\text{M} + \text{Na}^+$ ] 428.0932, found 428.0933.

#### 2-Phenyl-1-tosyl-5-(trifluoromethyl)-1H-indole (**2g**)

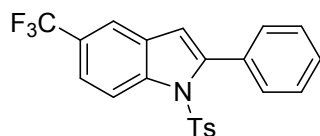

Following the general procedure, **2g** was purified by silica gel chromatography (5% EtOAc/petroleum ether). A white solid (151 mg, 73%); m.p. 123-125 °C.  $R_f = 0.67$

(20% EtOAc/petroleum ether);  $^1\text{H}$  NMR (600 MHz,  $\text{CDCl}_3$ )  $\delta$  8.43 (d,  $J = 8.8$  Hz, 1H), 7.75 (s, 1H), 7.52 – 7.39 (m, 5H), 7.28 (m, 2H), 7.08 (d,  $J = 8.1$  Hz, 2H), 6.59 (s, 1H), 2.31 (s, 3H).  $^{13}\text{C}$  NMR (151 MHz,  $\text{CDCl}_3$ )  $\delta$  145.1, 143.7, 139.7, 134.8, 131.6, 130.6, 130.0, 129.5, 129.1, 127.6, 126.8, 126.5(q,  $^2J_{\text{C-F}} = 21.4$  Hz), 125.4, 121.4(q,  $^4J_{\text{C-F}} = 2.4$  Hz), 118.1(q,  $^4J_{\text{C-F}} = 2.7$  Hz), 116.7, 112.7, 21.5. HRMS (ESI) calcd for  $\text{C}_{22}\text{H}_{16}\text{F}_3\text{NNaO}_2\text{S}^+$  [ $\text{M} + \text{Na}^+$ ] 438.0752, found 438.0750.

### 2-Phenyl-1-tosyl-1H-indole-5-carbonitrile (2h)

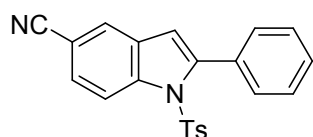

Following the general procedure, **2h** was purified by silica gel chromatography (5% EtOAc/petroleum ether). A white solid (121 mg, 65%); m.p. 118-119 °C.  $R_f = 0.25$  (20% EtOAc/petroleum ether);  $^1\text{H}$  NMR (400 MHz,  $\text{CDCl}_3$ )  $\delta$  8.42 (d,  $J = 8.7$  Hz, 1H), 7.80 (d,  $J = 1.1$  Hz, 1H), 7.61 (dd,  $J = 8.7, 1.6$  Hz, 1H), 7.51 – 7.40 (m, 5H), 7.24 (d, 2H), 7.08 (d,  $J = 8.1$  Hz, 2H), 6.57 (s, 1H), 2.32 (s, 3H).  $^{13}\text{C}$  NMR (101 MHz,  $\text{CDCl}_3$ )  $\delta$  145.4, 144.1, 139.9, 134.6, 131.2, 130.5, 130.2, 129.5, 129.3, 127.6, 126.8, 125.4, 119.3, 117.1, 112.0, 107.7, 21.6. HRMS (ESI) calcd for  $\text{C}_{22}\text{H}_{16}\text{N}_2\text{NaO}_2\text{S}^+$  [ $\text{M} + \text{Na}^+$ ] 395.0830, found 395.0833.

### 6-Methyl-2-phenyl-1-tosyl-1H-indole (2i)

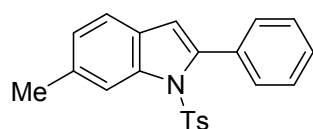

Following the general procedure, **2i** was purified by silica gel chromatography (5% EtOAc/petroleum ether). A white solid (176 mg, 98%); m.p. 178-180 °C.  $R_f = 0.69$  (10% EtOAc/petroleum ether);  $^1\text{H}$  NMR (600 MHz,  $\text{CDCl}_3$ )  $\delta$  8.12 (s, 1H), 7.47 (d,  $J = 4.6$  Hz, 2H), 7.40 (s, 3H), 7.30 (d,  $J = 7.8$  Hz, 1H), 7.24 (t,  $J = 8.4$  Hz, 2H), 7.08 (d,  $J = 7.7$  Hz, 1H), 7.02 (d,  $J = 7.9$  Hz, 2H), 6.47 (s, 1H), 2.51 (s, 3H), 2.26 (s, 3H).  $^{13}\text{C}$  NMR (151 MHz,  $\text{CDCl}_3$ )  $\delta$  144.4, 141.5, 138.8, 134.9, 134.8, 132.6, 130.3, 129.2, 128.5, 128.3, 127.5, 126.8, 125.8, 120.3, 116.9, 113.6, 22.1, 21.5. HRMS (ESI) calcd

for  $C_{22}H_{19}NNaO_2S^+$   $[M + Na^+]$  384.1034, found 384.1038.

#### 5-Methyl-2-phenyl-1-tosyl-1H-indole (2j)

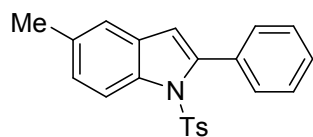

Following the general procedure, **2j** was purified by silica gel chromatography (5% EtOAc/petroleum ether). A pale yellow solid (174 mg, 96%); m.p. 111-113 °C.  $R_f$  = 0.50 (10% EtOAc/petroleum ether);  $^1H$  NMR (400 MHz,  $CDCl_3$ )  $\delta$  8.17 (d,  $J$  = 8.5 Hz, 1H), 7.50 (dd,  $J$  = 6.6, 3.1 Hz, 2H), 7.46 – 7.39 (m, 3H), 7.27 (s, 1H), 7.24 (d,  $J$  = 12.1 Hz, 2H), 7.17 (dd,  $J$  = 8.6, 1.3 Hz, 1H), 7.03 (d,  $J$  = 8.1 Hz, 2H), 6.47 (s, 1H), 2.41 (s, 3H), 2.28 (s, 3H).  $^{13}C$  NMR (101 MHz,  $CDCl_3$ )  $\delta$  144.4, 142.3, 136.5, 134.6, 134.0, 132.5, 130.8, 130.3, 129.2, 128.6, 127.5, 126.8, 126.2, 120.6, 116.4, 113.6, 21.5, 21.3. HRMS (ESI) calcd for  $C_{22}H_{19}NNaO_2S^+$   $[M + Na^+]$  384.1029, found 384.1028.

#### 4-Methyl-2-phenyl-1-tosyl-1H-indole (2k)

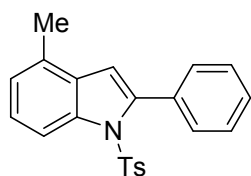

Following the general procedure, **2k** was purified by silica gel chromatography (5% EtOAc/petroleum ether). A white solid (165 mg, 91%); m.p. 163-164 °C.  $R_f$  = 0.50 (10% EtOAc/petroleum ether);  $^1H$  NMR (400 MHz,  $CDCl_3$ )  $\delta$  8.15 (d,  $J$  = 8.4 Hz, 1H), 7.52 (dd,  $J$  = 6.9, 2.8 Hz, 2H), 7.43 (dd,  $J$  = 5.1, 1.9 Hz, 3H), 7.33 – 7.29 (m, 2H), 7.26 (d,  $J$  = 15.8 Hz, 1H), 7.06 (t,  $J$  = 7.7 Hz, 3H), 6.59 (d,  $J$  = 0.7 Hz, 1H), 2.43 (s, 3H), 2.29 (s, 3H).  $^{13}C$  NMR (101 MHz,  $CDCl_3$ )  $\delta$  144.5, 141.4, 138.0, 134.8, 132.7, 130.4, 130.2, 130.1, 129.2, 128.6, 127.5, 126.8, 124.8, 124.7, 114.1, 112.1, 21.6, 18.4. HRMS (ESI) calcd for  $C_{22}H_{19}NNaO_2S^+$   $[M + Na^+]$  384.1029, found 384.1028.

#### 5-Methoxy-2-phenyl-1-tosyl-1H-indole (2l)

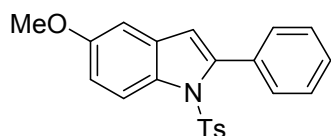

Following the general procedure, **2l** was purified by silica gel chromatography (5% EtOAc/petroleum ether). A white solid (143 mg, 76%); m.p. 123-125 °C.  $R_f = 0.48$  (10% EtOAc/petroleum ether);  $^1\text{H NMR}$  (400 MHz,  $\text{CDCl}_3$ )  $\delta$  8.19 (d,  $J = 9.1$  Hz, 1H), 7.51 (dd,  $J = 6.7, 3.0$  Hz, 2H), 7.46 – 7.39 (m, 3H), 7.24 (d,  $J = 8.3$  Hz, 2H), 7.03 (d,  $J = 8.0$  Hz, 2H), 6.96 (dd,  $J = 9.1, 2.6$  Hz, 1H), 6.88 (d,  $J = 2.5$  Hz, 1H), 6.48 (s, 1H), 3.83 (s, 3H), 2.29 (s, 3H).  $^{13}\text{C NMR}$  (101 MHz,  $\text{CDCl}_3$ )  $\delta$  157.1, 144.4, 143.1, 134.4, 132.9, 132.4, 131.8, 130.2, 129.2, 128.7, 127.5, 126.8, 117.8, 113.9, 113.4, 103.2, 55.6, 21.5. HRMS (ESI) calcd for  $\text{C}_{22}\text{H}_{19}\text{NNaO}_3\text{S}^+$  [ $\text{M} + \text{Na}^+$ ] 400.0978, found 400.0978.

#### 2-(4-Fluorophenyl)-1-tosyl-1H-indole (**2m**)

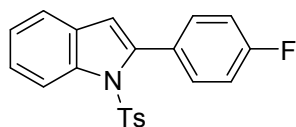

Following the general procedure, **2m** was purified by silica gel chromatography (5% EtOAc/petroleum ether). A white solid (152 mg, 83%); m.p. 135-137 °C.  $R_f = 0.62$  (10% EtOAc/petroleum ether);  $^1\text{H NMR}$  (400 MHz,  $\text{CDCl}_3$ )  $\delta$  8.31 (d,  $J = 8.4$  Hz, 1H), 7.45 (ddd,  $J = 8.8, 5.8, 2.8$  Hz, 3H), 7.36 (ddd,  $J = 8.5, 7.3, 1.3$  Hz, 1H), 7.30 – 7.22 (m, 3H), 7.10 (t,  $J = 8.7$  Hz, 2H), 7.04 (d,  $J = 8.0$  Hz, 2H), 6.51 (s, 1H), 2.28 (s, 3H).  $^{13}\text{C NMR}$  (101 MHz,  $\text{CDCl}_3$ )  $\delta$  163.1(d,  $^1J_{\text{C-F}} = 249.5$  Hz), 144.7, 140.9, 138.2, 134.6, 132.1(d,  $^3J_{\text{C-F}} = 8.3$  Hz), 130.4, 129.3, 128.4(d,  $^4J_{\text{C-F}} = 3.4$  Hz), 126.7, 125.0, 124.4, 120.7, 116.7, 114.6 (d,  $^2J_{\text{C-F}} = 21.6$  Hz), 113.7, 21.6. HRMS (ESI) calcd for  $\text{C}_{21}\text{H}_{16}\text{FNNaO}_2\text{S}^+$  [ $\text{M} + \text{Na}^+$ ] 388.0783, found 388.0782.

#### 2-(4-Chlorophenyl)-1-tosyl-1H-indole (**2n**)

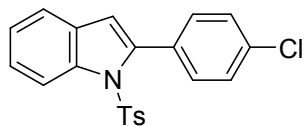

Following the general procedure, **2n** was purified by silica gel chromatography (5% EtOAc/petroleum ether). A white solid (178 mg, 94%); m.p. 138-140 °C.  $R_f = 0.61$  (10% EtOAc/petroleum ether);  $^1\text{H NMR}$  (600 MHz,  $\text{CDCl}_3$ )  $\delta$  8.30 (d,  $J = 8.4$  Hz, 1H), 7.43 (dd,  $J = 8.5, 2.4$  Hz, 3H), 7.40 – 7.34 (m, 3H), 7.26 (t,  $J = 8.0$  Hz, 3H), 7.03 (d,  $J = 8.2$  Hz, 2H), 6.53 (s, 1H), 2.27 (s, 3H).  $^{13}\text{C NMR}$  (151 MHz,  $\text{CDCl}_3$ )  $\delta$  144.7, 140.8, 138.4, 134.8, 134.6, 131.5, 130.9, 130.5, 129.3, 127.9, 126.8, 125.1, 124.5, 120.8, 116.7, 114.0, 21.5. HRMS (ESI) calcd for  $\text{C}_{21}\text{H}_{16}\text{ClNNaO}_2\text{S}^+$  [ $\text{M} + \text{Na}^+$ ] 404.0488, found 404.0489.

### 2-(3-chlorophenyl)-1-tosyl-1H-indole (2o)

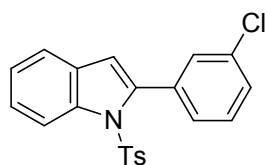

Following the general procedure, **2o** was purified by silica gel chromatography (5% EtOAc/petroleum ether). A white solid (152 mg, 79%); m.p. 49-50 °C.  $R_f = 0.52$  (10% EtOAc/petroleum ether);  $^1\text{H NMR}$  (600 MHz,  $\text{CDCl}_3$ )  $\delta$  8.32 (t,  $J = 7.6$  Hz, 1H), 7.50 – 7.34 (m, 6H), 7.28 (ddd,  $J = 6.8, 5.2, 3.0$  Hz, 3H), 7.07 (d,  $J = 8.1$  Hz, 2H), 6.57 (s, 1H), 2.30 (s, 3H).  $^{13}\text{C NMR}$  (151 MHz,  $\text{CDCl}_3$ )  $\delta$  144.8, 140.4, 138.4, 134.6, 134.2, 133.4, 130.3, 130.0, 129.3, 128.8, 128.7, 126.8, 125.2, 124.5, 120.9, 116.6, 114.2, 21.5. HRMS (ESI) calcd for  $\text{C}_{21}\text{H}_{16}\text{ClNNaO}_2\text{S}^+$  [ $\text{M} + \text{Na}^+$ ] 404.0488, found 404.0488.

### 2-(2-Chlorophenyl)-1-tosyl-1H-indole (2p)

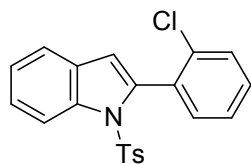

Following the general procedure, **2p** was purified by silica gel chromatography (5% EtOAc/petroleum ether). A colorless oil (130 mg, 68%);  $R_f = 0.48$  (10% EtOAc/petroleum ether);  $^1\text{H NMR}$  (600 MHz,  $\text{CDCl}_3$ )  $\delta$  8.28 (d,  $J = 8.4$  Hz, 1H), 7.50 (dd,  $J = 13.8, 7.8$  Hz, 2H), 7.44 (d,  $J = 8.3$  Hz, 2H), 7.42 – 7.31 (m, 4H), 7.28 (d,  $J = 7.5$  Hz, 1H), 7.11 (d,  $J = 8.2$  Hz, 2H), 6.63 (s, 1H), 2.31 (s, 3H).  $^{13}\text{C NMR}$  (151 MHz,

CDCl<sub>3</sub>)  $\delta$  144.7, 137.4, 137.2, 135.3, 135.1, 133.0, 131.6, 130.1, 129.8, 129.43, 129.40, 127.0, 125.8, 125.0, 123.9, 121.0, 115.7, 113.8, 21.5. HRMS (ESI) calcd for C<sub>21</sub>H<sub>16</sub>ClNNaO<sub>2</sub>S<sup>+</sup> [M + Na<sup>+</sup>] 404.0488, found 404.0485.

#### Ethyl 4-(1-tosyl-1*H*-indol-2-yl)benzoate (**2q**)

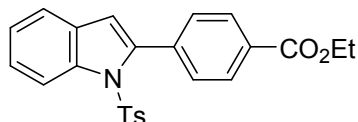

Following the general procedure, **2q** was purified by silica gel chromatography (5% EtOAc/petroleum ether). A white solid (155 mg, 74%); m.p. 118-119 °C.  $R_f$  = 0.25 (10% EtOAc/petroleum ether); <sup>1</sup>H NMR (400 MHz, CDCl<sub>3</sub>)  $\delta$  8.31 (d,  $J$  = 8.4 Hz, 1H), 8.11 (d,  $J$  = 8.4 Hz, 2H), 7.60 (d,  $J$  = 8.3 Hz, 2H), 7.45 (d,  $J$  = 7.6 Hz, 1H), 7.38 (t,  $J$  = 7.3 Hz, 1H), 7.29 (d,  $J$  = 7.9 Hz, 1H), 7.24 (s, 1H), 7.04 (d,  $J$  = 8.1 Hz, 2H), 7.04 (d,  $J$  = 8.1 Hz, 2H), 6.61 (s, 1H), 4.43 (q,  $J$  = 7.1 Hz, 2H), 2.28 (s, 3H), 1.43 (t,  $J$  = 7.1 Hz, 3H). <sup>13</sup>C NMR (101 MHz, CDCl<sub>3</sub>)  $\delta$  166.4, 144.8, 141.1, 138.6, 136.8, 134.3, 130.5, 130.4, 130.1, 129.3, 128.8, 126.8, 125.3, 124.6, 121.0, 116.8, 114.9, 61.1, 21.6, 14.4. HRMS (ESI) calcd for C<sub>24</sub>H<sub>21</sub>NNaO<sub>4</sub>S<sup>+</sup> [M + Na<sup>+</sup>] 442.1089, found 442.1088.

#### 1-Tosyl-2-(4-(trifluoromethyl)phenyl)-1*H*-indole (**2r**)

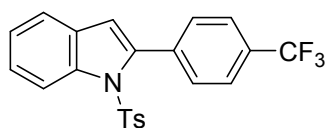

Following the general procedure, **2r** was purified by silica gel chromatography (5% EtOAc/petroleum ether). A white solid (141 mg, 68%); m.p. 164-165 °C.  $R_f$  = 0.53 (10% EtOAc/petroleum ether); <sup>1</sup>H NMR (400 MHz, CDCl<sub>3</sub>)  $\delta$  8.31 (dd,  $J$  = 8.4, 0.6 Hz, 1H), 7.66 (q,  $J$  = 8.3 Hz, 4H), 7.46 (d,  $J$  = 7.7 Hz, 1H), 7.39 (ddd,  $J$  = 8.5, 7.3, 1.3 Hz, 1H), 7.30 – 7.25 (m, 3H), 7.04 (d,  $J$  = 8.0 Hz, 2H), 6.61 (s, 1H), 2.28 (s, 3H). <sup>13</sup>C NMR (101 MHz, CDCl<sub>3</sub>)  $\delta$  144.9, 140.5, 138.5, 136.1, 134.3, 130.4, 129.4, 126.7, 125.4, 124.6, 124.5(q, <sup>4</sup> $J_{C-F}$  = 3.7 Hz), 121.0, 116.7, 115.0, 21.6. HRMS (ESI) calcd for C<sub>22</sub>H<sub>16</sub>F<sub>3</sub>NNaO<sub>2</sub>S<sup>+</sup> [M + Na<sup>+</sup>] 438.0752, found 438.0756.



### 2-(*p*-Tolyl)-1-tosyl-1*H*-indole (**2s**)

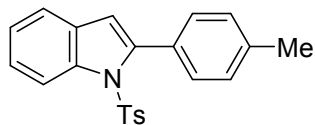

Following the general procedure, **2s** was purified by silica gel chromatography (5% EtOAc/petroleum ether). A white solid (167 mg, 92%); m.p. 101-103 °C.  $R_f$  = 0.46 (10% EtOAc/petroleum ether);  $^1\text{H}$  NMR (400 MHz,  $\text{CDCl}_3$ )  $\delta$  8.30 (d,  $J$  = 8.4 Hz, 1H), 7.41 (t,  $J$  = 7.6 Hz, 3H), 7.33 (t,  $J$  = 7.2 Hz, 1H), 7.28 (d,  $J$  = 8.5 Hz, 3H), 7.22 (s, 1H), 7.03 (d,  $J$  = 8.1 Hz, 2H), 6.50 (s, 1H), 2.43 (s, 3H), 2.27 (s, 3H).  $^{13}\text{C}$  NMR (101 MHz,  $\text{CDCl}_3$ )  $\delta$  144.5, 142.3, 138.7, 138.2, 134.6, 130.7, 130.2, 129.6, 129.2, 128.3, 126.8, 124.6, 124.3, 120.6, 116.7, 113.3, 21.6, 21.5. HRMS (ESI) calcd for  $\text{C}_{22}\text{H}_{19}\text{NNaO}_2\text{S}^+$  [ $\text{M} + \text{Na}^+$ ] 384.1034, found 384.1038.

### 2-(*m*-Tolyl)-1-tosyl-1*H*-indole (**2t**)

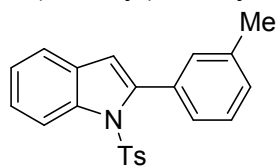

Following the general procedure, **2t** was purified by silica gel chromatography (5% EtOAc/petroleum ether). A white solid (141 mg, 78%); m.p. 132-133 °C.  $R_f$  = 0.43 (10% EtOAc/petroleum ether);  $^1\text{H}$  NMR (400 MHz,  $\text{CDCl}_3$ )  $\delta$  8.34 (d,  $J$  = 9.1 Hz, 1H), 7.51 (d,  $J$  = 7.7 Hz, 1H), 7.38 (ddd,  $J$  = 9.7, 5.7, 1.5 Hz, 4H), 7.29 (t,  $J$  = 7.5 Hz, 2H), 7.22 (t,  $J$  = 7.5 Hz, 1H), 7.11 (dd,  $J$  = 8.0, 3.6 Hz, 3H), 6.47 (s, 1H), 2.32 (s, 3H), 2.23 (s, 3H).  $^{13}\text{C}$  NMR (101 MHz,  $\text{CDCl}_3$ )  $\delta$  144.6, 140.3, 139.3, 137.3, 135.6, 132.1, 130.9, 130.1, 129.6, 129.4, 129.1, 126.9, 124.7, 124.6, 123.8, 120.7, 115.7, 112.3, 21.6, 20.5. HRMS (ESI) calcd for  $\text{C}_{22}\text{H}_{19}\text{NNaO}_2\text{S}^+$  [ $\text{M} + \text{Na}^+$ ] 384.1034, found 384.1036.

### 2-(*o*-Tolyl)-1-tosyl-1*H*-indole (**2u**)

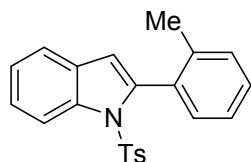

Following the general procedure, **2u** was purified by silica gel chromatography (5% EtOAc/petroleum ether). A white solid (168 mg, 93%); m.p. 98-100 °C.  $R_f$  = 0.54 (10% EtOAc/petroleum ether);  $^1\text{H}$  NMR (400 MHz,  $\text{CDCl}_3$ )  $\delta$  8.33 (d,  $J$  = 9.1 Hz, 1H), 7.50 (d,  $J$  = 7.3 Hz, 1H), 7.42 – 7.34 (m, 4H), 7.28 (t,  $J$  = 7.1 Hz, 2H), 7.21 (t,  $J$  = 7.5 Hz, 1H), 7.10 (d,  $J$  = 8.6 Hz, 3H), 6.47 (s, 1H), 2.32 (s, 3H), 2.23 (s, 3H).  $^{13}\text{C}$  NMR (101 MHz,  $\text{CDCl}_3$ )  $\delta$  144.7, 140.3, 139.4, 137.3, 135.6, 132.1, 130.9, 130.1, 129.6, 129.4, 129.1, 126.9, 124.7, 124.6, 123.8, 120.7, 115.7, 112.3, 21.6, 20.5. HRMS (ESI) calcd for  $\text{C}_{22}\text{H}_{19}\text{NNaO}_2\text{S}^+$  [ $\text{M} + \text{Na}^+$ ] 384.1034, found 384.1036.

#### 2-(4-Methoxyphenyl)-1-tosyl-1H-indole (**2v**)

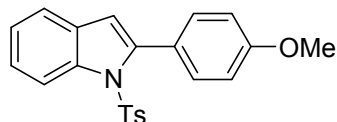

Following the general procedure, **2v** was purified by silica gel chromatography (5% EtOAc/petroleum ether). A white solid (170 mg, 90%); m.p. 135-137 °C.  $R_f$  = 0.42 (10% EtOAc/petroleum ether);  $^1\text{H}$  NMR (400 MHz,  $\text{CDCl}_3$ )  $\delta$  8.30 (d,  $J$  = 8.9 Hz, 1H), 7.42 (d,  $J$  = 8.8 Hz, 1H), 7.37 – 7.31 (m, 1H), 7.25 – 7.27 (m, 3H), 7.04 (d,  $J$  = 8.1 Hz, 1H), 6.95 (d,  $J$  = 8.8 Hz, 1H), 6.48 (s, 1H), 3.89 (s, 1H), 2.28 (s, 1H).  $^{13}\text{C}$  NMR (101 MHz,  $\text{CDCl}_3$ )  $\delta$  160.0, 144.5, 142.0, 138.2, 134.7, 131.7, 130.6, 129.2, 126.8, 124.7, 124.5, 124.3, 120.5, 116.7, 113.0, 112.9, 55.3, 21.5. HRMS (ESI) calcd for  $\text{C}_{22}\text{H}_{19}\text{NNaO}_3\text{S}^+$  [ $\text{M} + \text{Na}^+$ ] 400.0983, found 400.0986.

#### 2-(3-Methoxyphenyl)-1-tosyl-1H-indole (**2w**)

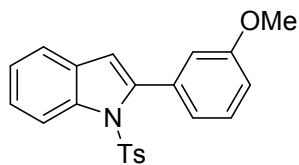

Following the general procedure, **2w** was purified by silica gel chromatography (5% EtOAc/petroleum ether). A white solid (162 mg, 86%); m.p. 108-110 °C.  $R_f$  = 0.46

(10% EtOAc/petroleum ether);  $^1\text{H}$  NMR (400 MHz,  $\text{CDCl}_3$ )  $\delta$  8.31 (d,  $J = 8.4$  Hz, 1H), 7.44 (d,  $J = 7.7$  Hz, 1H), 7.33 (m, 5H), 7.09 (d,  $J = 7.6$  Hz, 1H), 7.04 (d,  $J = 8.0$  Hz, 3H), 6.99 (dd,  $J = 8.3, 2.5$  Hz, 1H), 6.56 (s, 1H), 3.86 (s, 3H), 2.28 (s, 3H).  $^{13}\text{C}$  NMR (101 MHz,  $\text{CDCl}_3$ )  $\delta$  158.7, 144.6, 142.0, 138.3, 134.6, 133.7, 130.5, 129.2, 128.5, 126.9, 124.8, 124.3, 122.8, 120.7, 116.7, 115.9, 114.5, 113.7, 55.4, 21.5. HRMS (ESI) calcd for  $\text{C}_{22}\text{H}_{19}\text{NNaO}_3\text{S}^+$  [ $\text{M} + \text{Na}^+$ ] 400.0983, found 400.0982.

### 2-(2-Methoxyphenyl)-1-tosyl-1H-indole (2x)

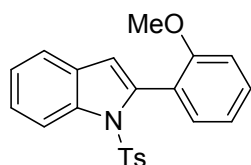

Following the general procedure, **2x** was purified by silica gel chromatography (5% EtOAc/petroleum ether). A white solid (172 mg, 91%); m.p. 78-80 °C.  $R_f = 0.50$  (10% EtOAc/petroleum ether);  $^1\text{H}$  NMR (400 MHz,  $\text{CDCl}_3$ )  $\delta$  8.23 (d,  $J = 8.4$  Hz, 1H), 7.50 – 7.42 (m, 2H), 7.40 (d,  $J = 8.3$  Hz, 2H), 7.35 – 7.29 (m, 1H), 7.26 – 7.20 (m, 2H), 7.09 (d,  $J = 8.0$  Hz, 2H), 7.01 (t,  $J = 7.4$  Hz, 1H), 6.96 (d,  $J = 8.3$  Hz, 1H), 6.55 (s, 1H), 3.78 (s, 3H), 2.30 (s, 3H).  $^{13}\text{C}$  NMR (101 MHz,  $\text{CDCl}_3$ )  $\delta$  158.6, 144.3, 138.0, 137.4, 135.8, 131.8, 130.6, 130.2, 129.3, 126.8, 124.4, 123.6, 121.9, 120.7, 119.6, 115.6, 112.4, 110.5, 55.5, 21.5. HRMS (ESI) calcd for  $\text{C}_{22}\text{H}_{19}\text{NNaO}_3\text{S}^+$  [ $\text{M} + \text{Na}^+$ ] 400.0983, found 400.0981.

### 4-(1-Tosyl-1H-indol-2-yl)phenyl acetate (2y)

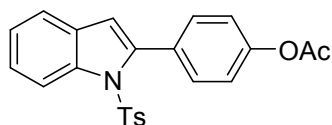

Following the general procedure, **2y** was purified by silica gel chromatography (10% EtOAc/petroleum ether). A white solid (180 mg, 89%); m.p. 97-99 °C.  $R_f = 0.50$  (20% EtOAc/petroleum ether);  $^1\text{H}$  NMR (400 MHz,  $\text{CDCl}_3$ )  $\delta$  8.32 (d,  $J = 9.0$  Hz, 1H), 7.50 (d,  $J = 8.7$  Hz, 2H), 7.45 (d,  $J = 7.7$  Hz, 1H), 7.36 (ddd,  $J = 8.5, 7.3, 1.3$  Hz, 1H), 7.25-7.29 (m, 3H), 7.16 (d,  $J = 8.7$  Hz, 2H), 7.04 (d,  $J = 8.1$  Hz, 2H), 6.54 (s, 1H),

2.35 (s, 3H), 2.28 (s, 3H).  $^{13}\text{C}$  NMR (101 MHz,  $\text{CDCl}_3$ )  $\delta$  169.4, 151.0, 144.7, 141.1, 138.3, 134.6, 131.5, 130.4, 130.0, 129.3, 126.8, 124.9, 124.4, 120.8, 120.7, 116.7, 113.8, 21.6, 21.3. HRMS (ESI) calcd for  $\text{C}_{23}\text{H}_{19}\text{NNaO}_4\text{S}^+$  [ $\text{M} + \text{Na}^+$ ] 428.0932, found 428.0932.

### 2-(Thiophen-2-yl)-1-tosyl-1H-indole (2z)

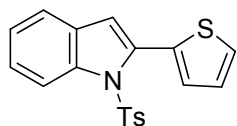

Following the general procedure, **2z** was purified by silica gel chromatography (5% EtOAc/petroleum ether). A pale yellow solid (119 mg, 67%); m.p. 90-91 °C.  $R_f$  = 0.59 (10% EtOAc/petroleum ether);  $^1\text{H}$  NMR (400 MHz,  $\text{CDCl}_3$ )  $\delta$  8.32 (dd,  $J$  = 8.4, 0.7 Hz, 1H), 7.44 (d,  $J$  = 7.8 Hz, 1H), 7.40 (dd,  $J$  = 5.1, 1.2 Hz, 1H), 7.38 – 7.30 (m, 4H), 7.29 – 7.23 (m, 1H), 7.11 (dd,  $J$  = 5.1, 3.6 Hz, 1H), 7.05 (d,  $J$  = 8.0 Hz, 2H), 6.63 (s, 1H), 2.28 (s, 3H).  $^{13}\text{C}$  NMR (101 MHz,  $\text{CDCl}_3$ )  $\delta$  144.7, 138.3, 134.9, 134.0, 132.4, 130.6, 129.9, 129.4, 127.1, 127.0, 126.8, 125.2, 124.3, 120.8, 116.5, 114.5, 21.6. HRMS (ESI) calcd for  $\text{C}_{19}\text{H}_{15}\text{NNaO}_2\text{S}_2^+$  [ $\text{M} + \text{Na}^+$ ] 376.0442, found 376.0446.

### 2-(Naphthalen-2-yl)-1-tosyl-1H-indole (2aa)

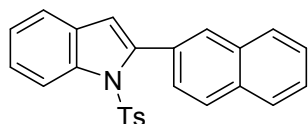

Following the general procedure, **2aa** was purified by silica gel chromatography (5% EtOAc/petroleum ether). A white solid (191 mg, 96%); m.p. 152-153 °C.  $R_f$  = 0.52 (10% EtOAc/petroleum ether);  $^1\text{H}$  NMR (600 MHz,  $\text{CDCl}_3$ )  $\delta$  8.34 (d,  $J$  = 8.3 Hz, 1H), 7.88 (t,  $J$  = 10.5 Hz, 4H), 7.69 (d,  $J$  = 8.3 Hz, 1H), 7.55 – 7.50 (m, 2H), 7.45 (d,  $J$  = 7.6 Hz, 1H), 7.36 (t,  $J$  = 7.7 Hz, 1H), 7.26 (t,  $J$  = 14.4 Hz, 3H), 6.99 (d,  $J$  = 8.0 Hz, 2H), 6.62 (s, 1H), 2.25 (s, 3H).  $^{13}\text{C}$  NMR (151 MHz,  $\text{CDCl}_3$ )  $\delta$  142.2, 138.5, 134.7, 134.7, 133.3, 132.7, 130.7, 130.2, 129.2, 128.8, 128.6, 128.2, 127.9, 126.9, 126.8, 126.6, 126.4, 124.9, 124.4, 120.8, 116.7, 114.2, 21.5. HRMS (ESI) calcd for  $\text{C}_{25}\text{H}_{19}\text{NNaO}_2\text{S}^+$  [ $\text{M} + \text{Na}^+$ ] 420.1034, found 420.1036.

### 1-(Methylsulfonyl)-2-phenyl-1H-indole (2ab)

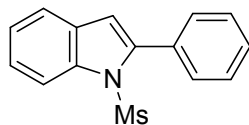

Following the general procedure, **2ab** was purified by silica gel chromatography (5% EtOAc/petroleum ether). A white solid (126 mg, 92%); m.p. 120-122 °C.  $R_f$  = 0.38 (10% EtOAc/petroleum ether);  $^1\text{H}$  NMR (600 MHz,  $\text{CDCl}_3$ )  $\delta$  8.12 (d,  $J$  = 8.1 Hz, 1H), 7.59 (d,  $J$  = 7.3 Hz, 1H), 7.57 – 7.54 (m, 2H), 7.45 – 7.40 (m, 3H), 7.40 – 7.32 (m, 2H), 6.70 (s, 1H), 2.72 (s, 3H).  $^{13}\text{C}$  NMR (151 MHz,  $\text{CDCl}_3$ )  $\delta$  142.0, 138.0, 132.0, 130.3, 130.2, 128.9, 127.8, 125.2, 124.6, 121.1, 115.9, 113.1, 39.5. HRMS (ESI) calcd for  $\text{C}_{21}\text{H}_{17}\text{NNaO}_2\text{S}^+$  [ $\text{M} + \text{Na}^+$ ] 370.0878, found 370.0882.

### 1-((4-Chlorophenyl)sulfonyl)-2-phenyl-1H-indole (2ac)

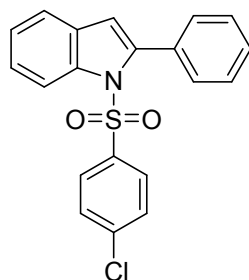

Following the general procedure, **2ac** was purified by silica gel chromatography (5% EtOAc/petroleum ether). A white solid (177 mg, 96%); m.p. 186-188 °C.  $R_f$  = 0.59 (10% EtOAc/petroleum ether);  $^1\text{H}$  NMR (600 MHz,  $\text{CDCl}_3$ )  $\delta$  8.28 (d,  $J$  = 8.4 Hz, 1H), 7.53 – 7.39 (m, 6H), 7.35 (t,  $J$  = 7.7 Hz, 1H), 7.28 (d,  $J$  = 8.7 Hz, 3H), 7.18 (d,  $J$  = 8.6 Hz, 2H), 6.55 (s, 1H).  $^{13}\text{C}$  NMR (151 MHz,  $\text{CDCl}_3$ )  $\delta$  142.1, 140.2, 138.3, 135.9, 132.1, 130.7, 130.3, 128.9, 128.9, 128.2, 127.7, 125.1, 124.7, 121.0, 116.7, 114.2. HRMS (ESI) calcd for  $\text{C}_{20}\text{H}_{14}\text{ClNNaO}_2\text{S}^+$  [ $\text{M} + \text{Na}^+$ ] 390.0331, found 390.0336.

### tert-butyl 2-phenyl-1H-indole-1-carboxylate (2ad)

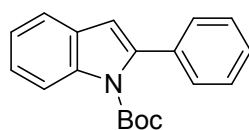

Following the general procedure, **2ad** was purified by silica gel chromatography (2% EtOAc/petroleum ether). A colorless oil (104 mg, 71%).  $R_f = 0.69$  (5% EtOAc/petroleum ether);  $^1\text{H NMR}$  (400 MHz,  $\text{CDCl}_3$ )  $\delta$  8.14 (d,  $J = 8.9$  Hz, 1H), 7.49 (d,  $J = 8.1$  Hz, 1H), 7.36 – 7.23 (m, 6H), 7.17 (dd,  $J = 7.5, 0.9$  Hz, 1H), 6.49 (s, 1H), 1.23 (s, 9H).  $^{13}\text{C NMR}$  (101 MHz,  $\text{CDCl}_3$ )  $\delta$  150.2, 140.5, 137.5, 135.0, 129.2, 128.7, 127.8, 127.6, 124.3, 122.9, 120.5, 115.2, 109.9, 83.4, 27.6. HRMS (ESI) calcd for  $\text{C}_{19}\text{H}_{19}\text{NNaO}_2^+$  [ $\text{M} + \text{Na}^+$ ] 316.1308, found 316.1306.

### 5. The Procedure for the Synthesis of Indoline **2a'**:

To a solution of substrate **1** (0.5 mmol) in DMSO (1 mL) was slowly added  $\text{SOCl}_2$  (1.0 mmol, 119 mg) at 25 °C. The reaction mixture was kept stirring at 25 °C until TLC indicated the total consumption of substrate **1**. Then the reaction mixture was quenched with saturated aq.  $\text{NaHCO}_3$  solution (5 mL) and water (20 mL), extracted with EtOAc ( $3 \times 20$  mL), combined the organic phase then evaporated the solvent, purified by flash column chromatography (5% EtOAc/petroleum ether) to afford the desired compound **2a** (125 mg, 72%) and compound **2a'** (40 mg, 20%).

### 6. Spectroscopic data of Indoline **2a'**:

#### 3-(Methylthio)-2-phenyl-1-tosylindoline (**2a'**)

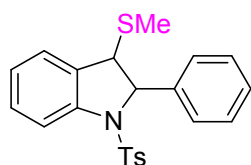

Following the procedure, **2a'** was purified by silica gel chromatography (5% EtOAc/petroleum ether). A white solid; mp: 146-147 °C.  $R_f = 0.42$  (10% EtOAc/petroleum ether);  $^1\text{H NMR}$  (400 MHz,  $\text{CDCl}_3$ )  $\delta$  7.75 (d,  $J = 8.2$  Hz, 1H), 7.65 (d,  $J = 8.3$  Hz, 2H), 7.35 – 7.25 (m, 6H), 7.18 (d,  $J = 8.1$  Hz, 3H), 7.06 (td,  $J = 7.5, 0.8$  Hz, 1H), 5.20 (d,  $J = 3.1$  Hz, 1H), 4.06 (d,  $J = 3.0$  Hz, 1H), 2.34 (s, 3H), 1.70 (s, 3H).  $^{13}\text{C NMR}$  (101 MHz,  $\text{CDCl}_3$ )  $\delta$  144.2, 142.1, 141.7, 135.1, 129.6, 129.5, 129.4, 128.9, 128.0, 127.5, 126.0, 125.7, 124.4, 115.0, 72.8, 54.6, 21.6, 12.6. HRMS (ESI)

calcd for  $C_{22}H_{21}NNaO_2S_2^+$  [ $M + Na^+$ ] 418.0911, found 418.0916.

## 7. General Procedure for the Synthesis of 3-Methylthioindole Derivatives **3**

### (3a-l):

**Method A:** To a solution of substrate **1** (0.5 mmol) in DMSO (1 mL) was slowly added  $SOCl_2$  (2.0 mmol, 239 mg) at 25 °C. The mixture was kept stirring at 70 °C until TLC indicated the total consumption of substrate **1**. Then the reaction mixture was quenched with saturated aq.  $NaHCO_3$  solution (5 mL) and water (20 mL), extracted with EtOAc (3 x 20 mL), combined the organic phase then evaporated the solvent, purified by flash column chromatography (3% EtOAc/petroleum ether) to afford the desired 3-methylthioindole derivatives **3**.

**Method B:** To a solution of substrate **1** (0.5 mmol) in DMSO (1 mL) was slowly added  $SOCl_2$  (1.75 mmol, 209 mg) at 25 °C. The mixture was kept stirring at 70 °C until TLC indicated the total consumption of substrate **1**. Then the reaction mixture was quenched with saturated aq.  $NaHCO_3$  solution (5 mL) and water (20 mL), extracted with EtOAc (3 x 20 mL), combined the organic phase then evaporated the solvent, purified by flash column chromatography (3% EtOAc/petroleum ether) to afford the desired 3-methylthioindole derivatives **3**.

## 8. Spectroscopic Data of 3-Methylthioindoles Derivatives **3** (3a-l):

### 3-(Methylthio)-2-phenyl-1-tosyl-1*H*-indole (**3a**)

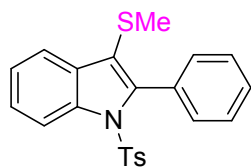

Following the general procedure **Method A**, **3a** was purified by silica gel chromatography (3% EtOAc/petroleum ether). A white solid (109 mg, 55%); mp: 104-105 °C.  $R_f = 0.45$  (20% EtOAc/petroleum ether);  $^1H$  NMR (400 MHz,  $CDCl_3$ )  $\delta$  8.37 (d,  $J = 8.3$  Hz, 1H), 7.70 (dd,  $J = 7.7, 0.7$  Hz, 1H), 7.51 – 7.41 (m, 4H), 7.41 – 7.35 (m, 3H), 7.30 (d,  $J = 8.4$  Hz, 2H), 7.08 (d,  $J = 8.1$  Hz, 2H), 2.31 (s, 3H), 2.07 (s,

3H).  $^{13}\text{C}$  NMR (101 MHz,  $\text{CDCl}_3$ )  $\delta$  144.9, 142.7, 137.0, 135.2, 131.8, 131.2, 130.7, 129.4, 129.1, 127.2, 126.9, 125.5, 124.3, 119.9, 117.4, 116.2, 21.6, 18.3. HRMS (ESI) calcd for  $\text{C}_{22}\text{H}_{19}\text{NNaO}_2\text{S}_2^+$  [ $\text{M} + \text{Na}^+$ ] 416.0749, found 416.0748.

### 5-Methyl-3-(methylthio)-2-phenyl-1-tosyl-1H-indole (3b)

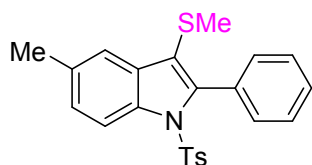

Following the general procedure **Method B**, **3b** was purified by silica gel chromatography (3% EtOAc/petroleum ether). A white solid (153 mg, 75%); mp: 119-121°C.  $R_f$  = 0.62 (10% EtOAc/petroleum ether);  $^1\text{H}$  NMR (400 MHz,  $\text{CDCl}_3$ )  $\delta$  8.27 (d,  $J$  = 8.5 Hz, 1H), 7.48 (dd,  $J$  = 11.7, 4.1 Hz, 4H), 7.42 (d,  $J$  = 8.0 Hz, 2H), 7.31 (dd,  $J$  = 14.4, 7.6 Hz, 3H), 7.07 (d,  $J$  = 8.2 Hz, 2H), 2.50 (s, 3H), 2.31 (s, 3H), 2.08 (s, 3H).  $^{13}\text{C}$  NMR (101 MHz,  $\text{CDCl}_3$ )  $\delta$  144.8, 142.9, 135.3, 135.1, 134.2, 131.8, 131.5, 130.8, 129.4, 129.0, 127.2, 126.9, 126.9, 119.8, 117.3, 116.0, 21.6, 21.4, 18.4. HRMS (ESI) calcd for  $\text{C}_{23}\text{H}_{21}\text{NNaO}_2\text{S}_2^+$  [ $\text{M} + \text{Na}^+$ ] 430.0906, found 430.0906.

### 5-Fluoro-3-(methylthio)-2-phenyl-1-tosyl-1H-indole (3c)

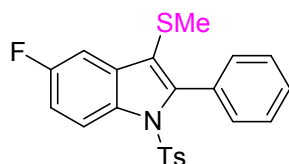

Following the general procedure **Method A**, **3c** was purified by silica gel chromatography (3% EtOAc/petroleum ether). A white solid (105 mg, 51%); mp: 120-121 °C.  $R_f$  = 0.45 (10% EtOAc/petroleum ether);  $^1\text{H}$  NMR (400 MHz,  $\text{CDCl}_3$ )  $\delta$  8.31 (dd,  $J$  = 9.1, 4.4 Hz, 1H), 7.47 (ddd,  $J$  = 15.8, 7.7, 2.1 Hz, 3H), 7.39 – 7.35 (m, 2H), 7.33 (dd,  $J$  = 8.4, 2.5 Hz, 1H), 7.28 (s, 1H), 7.26 (s, 1H), 7.14 (td,  $J$  = 9.0, 2.6 Hz, 1H), 7.09 (d,  $J$  = 8.1 Hz, 2H), 2.33 (s, 3H), 2.04 (s, 3H).  $^{13}\text{C}$  NMR (101 MHz,  $\text{CDCl}_3$ )  $\delta$  160.3(d,  $^1J_{\text{C-F}}$  = 240.7 Hz), 145.1, 144.6, 134.9, 133.2, 132.7(d,  $^3J_{\text{C-F}}$  = 10.0 Hz), 131.7, 130.3, 129.5, 129.3, 127.3, 126.9, 117.6(d,  $^3J_{\text{C-F}}$  = 9.0 Hz), 117.2(d,  $^4J_{\text{C-F}}$  = 3.8 Hz), 113.4(d,  $^2J_{\text{C-F}}$  = 25.0 Hz), 105.5(d,  $^2J_{\text{C-F}}$  = 24.3 Hz), 21.6, 18.2. HRMS (ESI)



calcd for  $C_{22}H_{18}FNNaO_2S_2^+$  [ $M + Na^+$ ] 434.0655, found 434.0656.

### 6-Bromo-3-(methylthio)-2-phenyl-1-tosyl-1H-indole (3d)

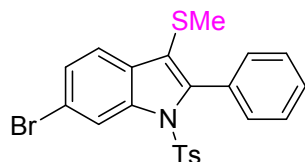

Following the general procedure **Method A**, **3d** was purified by silica gel chromatography (3% EtOAc/petroleum ether). A white solid (125 mg, 53%); mp: 138-139 °C.  $R_f = 0.50$  (10% EtOAc/petroleum ether);  $^1H$  NMR (400 MHz,  $CDCl_3$ )  $\delta$  8.56 (d,  $J = 1.4$  Hz, 1H), 7.57 – 7.40 (m, 5H), 7.32 (d,  $J = 6.9$  Hz, 2H), 7.28 (s, 1H), 7.25 (s, 1H), 7.10 (d,  $J = 8.2$  Hz, 2H), 2.33 (s, 3H), 2.03 (s, 3H).  $^{13}C$  NMR (101 MHz,  $CDCl_3$ )  $\delta$  145.2, 143.2, 137.6, 135.0, 131.8, 130.1, 130.0, 129.6, 129.3, 127.6, 127.3, 127.0, 121.0, 119.1, 117.0, 21.6, 18.4. HRMS (ESI) calcd for  $C_{22}H_{18}BrNNaO_2S_2^+$  [ $M + Na^+$ ] 493.9855, found 493.9856.

### 2-(4-Fluorophenyl)-3-(methylthio)-1-tosyl-1H-indole (3e)

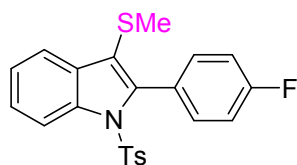

Following the general procedure **Method A**, **3e** was purified by silica gel chromatography (3% EtOAc/petroleum ether). A white solid (64 mg, 31%); mp: 123-125 °C.  $R_f = 0.50$  (10% EtOAc/petroleum ether);  $^1H$  NMR (400 MHz,  $CDCl_3$ )  $\delta$  8.36 (d,  $J = 8.3$  Hz, 1H), 7.69 (dd,  $J = 7.7, 0.7$  Hz, 1H), 7.44 (ddd,  $J = 8.4, 7.3, 1.4$  Hz, 1H), 7.40 – 7.32 (m, 3H), 7.28 (d,  $J = 8.4$  Hz, 2H), 7.19 – 7.11 (m, 2H), 7.08 (d,  $J = 8.0$  Hz, 2H), 2.32 (s, 3H), 2.07 (s, 3H).  $^{13}C$  NMR (101 MHz,  $CDCl_3$ )  $\delta$  163.2(d,  $^1J_{C-F} = 247.8$  Hz), 145.0, 141.6, 137.0, 135.1, 133.6(d,  $^3J_{C-F} = 8.4$  Hz), 131.0, 129.5, 126.8, 126.5(d,  $^4J_{C-F} = 3.4$  Hz), 125.7, 124.4, 119.9, 117.7, 116.2, 114.5(d,  $^2J_{C-F} = 21.6$  Hz), 21.6, 18.3. HRMS (ESI) calcd for  $C_{22}H_{18}FNNaO_2S_2^+$  [ $M + Na^+$ ] 434.0655, found 434.0656.

### 3-(Methylthio)-2-(p-tolyl)-1-tosyl-1H-indole (3f)

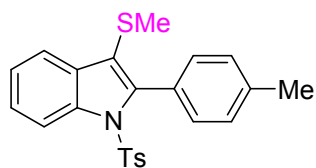

Following the general procedure **Method A**, **3f** was purified by silica gel chromatography (3% EtOAc/petroleum ether). A white solid (143 mg, 70%); mp: 131-133 °C.  $R_f = 0.45$  (10% EtOAc/petroleum ether);  $^1\text{H NMR}$  (400 MHz,  $\text{CDCl}_3$ )  $\delta$  8.35 (d,  $J = 8.2$  Hz, 1H), 7.67 (d,  $J = 7.5$  Hz, 1H), 7.45 – 7.34 (m, 2H), 7.32 – 7.26 (m, 6H), 7.07 (d,  $J = 8.1$  Hz, 2H), 2.47 (s, 3H), 2.31 (s, 3H), 2.07 (s, 3H).  $^{13}\text{C NMR}$  (101 MHz,  $\text{CDCl}_3$ )  $\delta$  144.8, 143.0, 139.1, 137.0, 135.1, 131.6, 131.2, 129.4, 128.0, 127.7, 126.9, 125.4, 124.3, 119.8, 117.2, 116.2, 21.6, 21.6, 18.3. HRMS (ESI) calcd for  $\text{C}_{23}\text{H}_{21}\text{NNaO}_2\text{S}_2^+$  [ $\text{M} + \text{Na}^+$ ] 430.0911, found 430.0913.

### 2-(4-Methoxyphenyl)-3-(methylthio)-1-tosyl-1H-indole (**3g**)

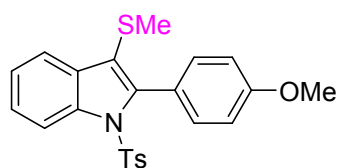

Following the general procedure **Method B**, **3g** was purified by silica gel chromatography (3% EtOAc/petroleum ether). A white solid (173 mg, 82%); mp: 147-148 °C.  $R_f = 0.45$  (10% EtOAc/petroleum ether);  $^1\text{H NMR}$  (400 MHz,  $\text{CDCl}_3$ )  $\delta$  8.36 (d,  $J = 8.2$  Hz, 1H), 7.67 (d,  $J = 7.8$  Hz, 1H), 7.45 – 7.34 (m, 2H), 7.32 – 7.26 (m, 4H), 7.06 (d,  $J = 8.1$  Hz, 2H), 6.98 (d,  $J = 8.8$  Hz, 2H), 3.90 (s, 4H), 2.31 (s, 3H), 2.07 (s, 3H).  $^{13}\text{C NMR}$  (101 MHz,  $\text{CDCl}_3$ )  $\delta$  160.2, 144.8, 142.7, 137.0, 135.2, 133.1, 131.1, 129.3, 126.9, 125.3, 124.3, 122.7, 119.7, 117.0, 116.3, 112.7, 55.3, 21.6, 18.3. HRMS (ESI) calcd for  $\text{C}_{23}\text{H}_{21}\text{NNaO}_3\text{S}_2^+$  [ $\text{M} + \text{Na}^+$ ] 446.0861, found 446.0861.

### 2-(2-Methoxyphenyl)-3-(methylthio)-1-tosyl-1H-indole (**3h**)

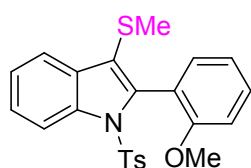

Following the general procedure **Method B**, **3h** was purified by silica gel chromatography (3% EtOAc/petroleum ether). A white solid (163 mg, 77%); mp: 154-156 °C.  $R_f = 0.42$  (10% EtOAc/petroleum ether);  $^1\text{H NMR}$  (400 MHz,  $\text{CDCl}_3$ )  $\delta$  8.29 (dd,  $J = 8.4, 1.4$  Hz, 1H), 7.70 (dd,  $J = 8.2, 1.4$  Hz, 1H), 7.48 (ddd,  $J = 8.3, 7.5, 1.8$  Hz, 1H), 7.44 – 7.36 (m, 3H), 7.34 (td,  $J = 7.5, 1.1$  Hz, 1H), 7.14 (dd,  $J = 7.5, 1.8$  Hz, 1H), 7.10 (d,  $J = 8.0$  Hz, 2H), 7.04 (td,  $J = 7.4, 1.0$  Hz, 1H), 6.96 (d,  $J = 8.3$  Hz, 1H), 3.69 (s, 3H), 2.32 (s, 3H), 2.11 (s, 3H).  $^{13}\text{C NMR}$  (101 MHz,  $\text{CDCl}_3$ )  $\delta$  158.6, 144.5, 139.4, 136.7, 135.9, 133.0, 131.0, 130.9, 129.3, 127.0, 125.1, 123.7, 120.1, 119.7, 119.5, 116.6, 115.4, 110.5, 55.3, 21.6, 18.3. HRMS (ESI) calcd for  $\text{C}_{23}\text{H}_{21}\text{NNaO}_3\text{S}_2^+$  [ $\text{M} + \text{Na}^+$ ] 446.0861, found 446.0862.

### 6-Methyl-3-(methylthio)-2-(*p*-tolyl)-1-tosyl-1*H*-indole (**3i**)

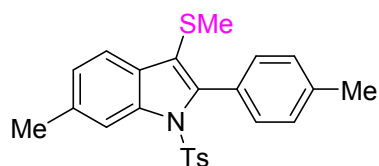

Following the general procedure **Method A**, **3i** was purified by silica gel chromatography (3% EtOAc/petroleum ether). A white solid (131 mg, 62%); mp: 163-164 °C.  $R_f = 0.55$  (10% EtOAc/petroleum ether);  $^1\text{H NMR}$  (400 MHz,  $\text{CDCl}_3$ )  $\delta$  8.18 (s, 1H), 7.55 (d,  $J = 8.0$  Hz, 1H), 7.30 (d,  $J = 8.4$  Hz, 2H), 7.27 (d,  $J = 5.5$  Hz, 4H), 7.19 (d,  $J = 7.9$  Hz, 1H), 7.08 (d,  $J = 8.1$  Hz, 2H), 2.57 (s, 3H), 2.47 (s, 3H), 2.33 (s, 3H), 2.07 (s, 3H).  $^{13}\text{C NMR}$  (101 MHz,  $\text{CDCl}_3$ )  $\delta$  144.7, 142.2, 138.9, 137.4, 135.6, 135.3, 131.6, 129.3, 129.0, 128.0, 127.8, 126.9, 125.7, 119.4, 117.1, 116.4, 22.1, 21.6, 21.6, 18.3. HRMS (ESI) calcd for  $\text{C}_{24}\text{H}_{23}\text{NNaO}_2\text{S}_2^+$  [ $\text{M} + \text{Na}^+$ ] 444.1062, found 444.1063.

### 2-(4-Methoxyphenyl)-6-methyl-3-(methylthio)-1-tosyl-1*H*-indole (**3j**)

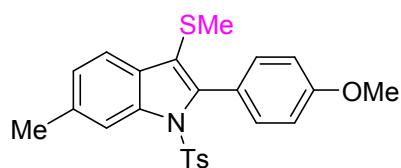

Following the general procedure **Method B**, **3j** was purified by silica gel

chromatography (3% EtOAc/petroleum ether). A white solid (138 mg, 63%); mp: 131-133 °C.  $R_f$  = 0.50 (20% EtOAc/petroleum ether);  $^1\text{H}$  NMR (400 MHz,  $\text{CDCl}_3$ )  $\delta$  8.18 (s, 1H), 7.54 (d,  $J$  = 8.0 Hz, 1H), 7.32 – 7.24 (m, 5H), 7.19 (d,  $J$  = 8.0 Hz, 1H), 7.07 (d,  $J$  = 8.0 Hz, 2H), 6.96 (d,  $J$  = 8.8 Hz, 2H), 3.90 (s, 3H), 2.55 (s, 3H), 2.31 (s, 3H), 2.06 (s, 3H).  $^{13}\text{C}$  NMR (101 MHz,  $\text{CDCl}_3$ )  $\delta$  160.1, 144.7, 142.0, 137.4, 135.5, 135.3, 133.1, 129.3, 129.1, 126.8, 125.7, 122.9, 119.3, 117.0, 116.4, 112.7, 55.3, 22.1, 21.6, 18.3. HRMS (ESI) calcd for  $\text{C}_{24}\text{H}_{23}\text{NNaO}_3\text{S}_2^+$  [ $\text{M} + \text{Na}^+$ ] 460.1012, found 460.1013.

### 3-(Methylthio)-2-(thiophen-2-yl)-1-tosyl-1H-indole (3k)

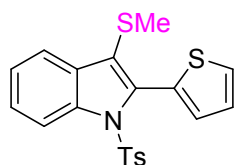

Following the general procedure **Method A**, **3k** was purified by silica gel chromatography (3% EtOAc/petroleum ether). A white solid (130 mg, 65%); mp: 80-81 °C.  $R_f$  = 0.40 (20% EtOAc/petroleum ether);  $^1\text{H}$  NMR (600 MHz,  $\text{CDCl}_3$ )  $\delta$  8.35 (d,  $J$  = 8.4 Hz, 1H), 7.69 (d,  $J$  = 8.2 Hz, 1H), 7.54 (dd,  $J$  = 5.0, 1.3 Hz, 1H), 7.43 (ddd,  $J$  = 8.5, 7.3, 1.3 Hz, 1H), 7.39 – 7.32 (m, 3H), 7.16 (ddd,  $J$  = 8.6, 4.8, 3.5 Hz, 2H), 7.09 (d,  $J$  = 8.5 Hz, 2H), 2.32 (s, 3H), 2.14 (s, 3H).  $^{13}\text{C}$  NMR (151 MHz,  $\text{CDCl}_3$ )  $\delta$  144.8, 137.3, 135.3, 135.0, 132.2, 130.8, 130.2, 129.4, 128.6, 126.9, 126.4, 125.9, 124.3, 119.9, 119.7, 116.1, 21.6, 18.6. HRMS (ESI) calcd for  $\text{C}_{20}\text{H}_{17}\text{NNaO}_2\text{S}_3^+$  [ $\text{M} + \text{Na}^+$ ] 422.0314, found 422.0316.

### 2-(4-Methoxyphenyl)-1-(methylsulfonyl)-3-(methylthio)-1H-indole (3l)

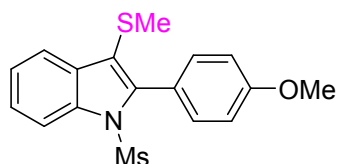

Following the general procedure **Method B**, **3l** was purified by silica gel chromatography (3% EtOAc/petroleum ether). A white solid (127 mg, 73%); mp: 123-125 °C.  $R_f$  = 0.45 (20% EtOAc/petroleum ether);  $^1\text{H}$  NMR (400 MHz,  $\text{CDCl}_3$ )  $\delta$

8.20 – 8.09 (m, 1H), 7.81 – 7.75 (m, 1H), 7.47 – 7.39 (m, 4H), 7.06 – 6.96 (m, 2H), 3.88 (s, 3H), 2.80 (s, 3H), 2.17 (s, 3H). <sup>13</sup>C NMR (101 MHz, CDCl<sub>3</sub>) δ 160.3, 142.5, 136.7, 132.8, 131.1, 125.6, 124.5, 122.4, 120.0, 116.9, 115.6, 113.1, 55.3, 40.6, 18.4. HRMS (ESI) calcd for C<sub>17</sub>H<sub>17</sub>NNaO<sub>3</sub>S<sub>2</sub><sup>+</sup> [M + Na<sup>+</sup>] 370.0542, found 370.0543.

***tert*-butyl 3-(methylthio)-2-phenyl-1*H*-indole-1-carboxylate (3m)**

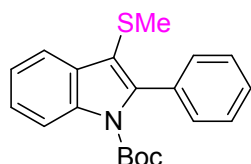

Following the general procedure **Method A**, **3m** was purified by silica gel chromatography (2% EtOAc/petroleum ether). A colorless oil (102 mg, 60%). *R<sub>f</sub>* = 0.59 (5% EtOAc/petroleum ether); <sup>1</sup>H NMR (600 MHz, CDCl<sub>3</sub>) δ 8.26 (d, *J* = 8.2 Hz, 1H), 7.78 (d, *J* = 7.6 Hz, 1H), 7.46 – 7.39 (m, 6H), 7.35 (dd, *J* = 8.6, 5.4 Hz, 1H), 2.18 (s, 3H), 1.24 (s, 9H). <sup>13</sup>C NMR (151 MHz, CDCl<sub>3</sub>) δ 149.7, 142.1, 136.6, 133.7, 130.3, 130.0, 128.0, 127.7, 125.0, 123.2, 119.5, 115.3, 114.2, 83.6, 27.5, 18.8. HRMS (ESI) calcd for C<sub>20</sub>H<sub>21</sub>NNaO<sub>2</sub>S<sup>+</sup> [M + Na<sup>+</sup>] 362.1185, found 362.1188.

**1-(3-(methylthio)-2-phenyl-1*H*-indol-1-yl)ethan-1-one (3n)**

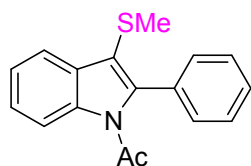

Following the general procedure **Method A**, **3n** was purified by silica gel chromatography (5% EtOAc/petroleum ether). A white solid (101 mg, 72%); m.p. 135-137 °C. *R<sub>f</sub>* = 0.52 (10% EtOAc/petroleum ether); <sup>1</sup>H NMR (600 MHz, CDCl<sub>3</sub>) δ 8.40 (d, *J* = 7.9 Hz, 1H), 7.78 (d, *J* = 7.3 Hz, 1H), 7.54 – 7.50 (m, 3H), 7.47 (dd, *J* = 7.7, 1.7 Hz, 2H), 7.40 (dtd, *J* = 20.3, 7.3, 1.1 Hz, 2H), 2.19 (s, 3H), 1.97 (s, 3H). <sup>13</sup>C NMR (151 MHz, CDCl<sub>3</sub>) δ 171.1, 141.2, 136.8, 132.7, 130.5, 130.0, 129.2, 128.6, 125.9, 124.0, 119.5, 116.3, 115.9, 27.7, 18.7. HRMS (ESI) calcd for C<sub>17</sub>H<sub>15</sub>NNaO<sup>+</sup> [M + Na<sup>+</sup>] 304.0767, found 304.0765.

## 9. General Procedure for the Synthesis of 3-(*d*<sub>3</sub>-Methylthio) Indole Derivative 3’:

To a solution of substrate **1** (0.5 mmol) in DMSO (1 mL) was slowly added SOCl<sub>2</sub> (1.75 mmol, 209 mg) at 25 °C. The mixture was kept stirring at 70 °C until TLC indicated the total consumption of substrate **1v**. Then the reaction mixture was quenched with saturated aq. NaHCO<sub>3</sub> solution (5 mL) and water (20 mL), extracted with EtOAc (3 x 20 mL), combined the organic phase then evaporated the solvent, purified by flash column chromatography (3% EtOAc/petroleum ether) to afford the desired compound **3’** (165 mg, 78%).

## 10. Spectroscopic Data of 3-(*d*<sub>3</sub>-Methylthio) Indole Derivative 3’:

### 2-(4-Methoxyphenyl)-3-(*d*<sub>3</sub>-methylthio)-1-tosyl-1*H*-indole (3’)

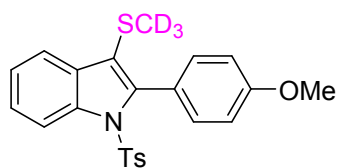

Following the procedure, **3’** was purified by silica gel chromatography (3% EtOAc/petroleum ether). A white solid (165 mg, 78%); mp: 146-147 °C. *R*<sub>f</sub> = 0.50 (10% EtOAc/petroleum ether); <sup>1</sup>H NMR (600 MHz, CDCl<sub>3</sub>) δ 8.35 (d, *J* = 8.3 Hz, 1H), 7.66 (d, *J* = 8.2 Hz, 1H), 7.43 – 7.38 (m, 1H), 7.35 (td, *J* = 7.7, 0.8 Hz, 1H), 7.28 (dd, *J* = 11.6, 8.6 Hz, 4H), 7.05 (d, *J* = 8.1 Hz, 2H), 6.97 (d, *J* = 8.7 Hz, 2H), 3.89 (s, 3H), 2.30 (s, 3H). <sup>13</sup>C NMR (151 MHz, CDCl<sub>3</sub>) δ 160.2, 144.7, 142.7, 137.0, 135.3, 133.1, 131.3, 129.3, 126.9, 125.3, 124.2, 122.7, 119.7, 116.9, 116.3, 112.7, 55.3, 21.5. HRMS (ESI) calcd for C<sub>23</sub>H<sub>18</sub>D<sub>3</sub>NNaO<sub>3</sub>S<sub>2</sub><sup>+</sup> [M + Na<sup>+</sup>] 446.0855, found 446.0856.

#### **IV. References:**

- (1) (a) Y. H. Jang and S. W. Youn, *Org. Lett.*, 2014, **16**, 3720-3723; (b) Y. L. Li, J. Li, A. L. Ma, Y. N. Huang and J. Deng, *J. Org. Chem.*, 2015, **80**, 3841-3851; (c) S. Ortgies and A. Breder, *Org. Lett.*, 2015, **17**, 2748-2751.
- (2) J. F. Zou, W. S. Huang, L. Li, Z. Xu, Z. J. Zheng, K. F. Yang and L. W. Xu, *RSC Adv.*, 2015, **5**, 30389-30393.

V. <sup>1</sup>H and <sup>13</sup>C NMR Spectra of Compounds 1a-f, 2a-c, 2a', 3a-l and 3':

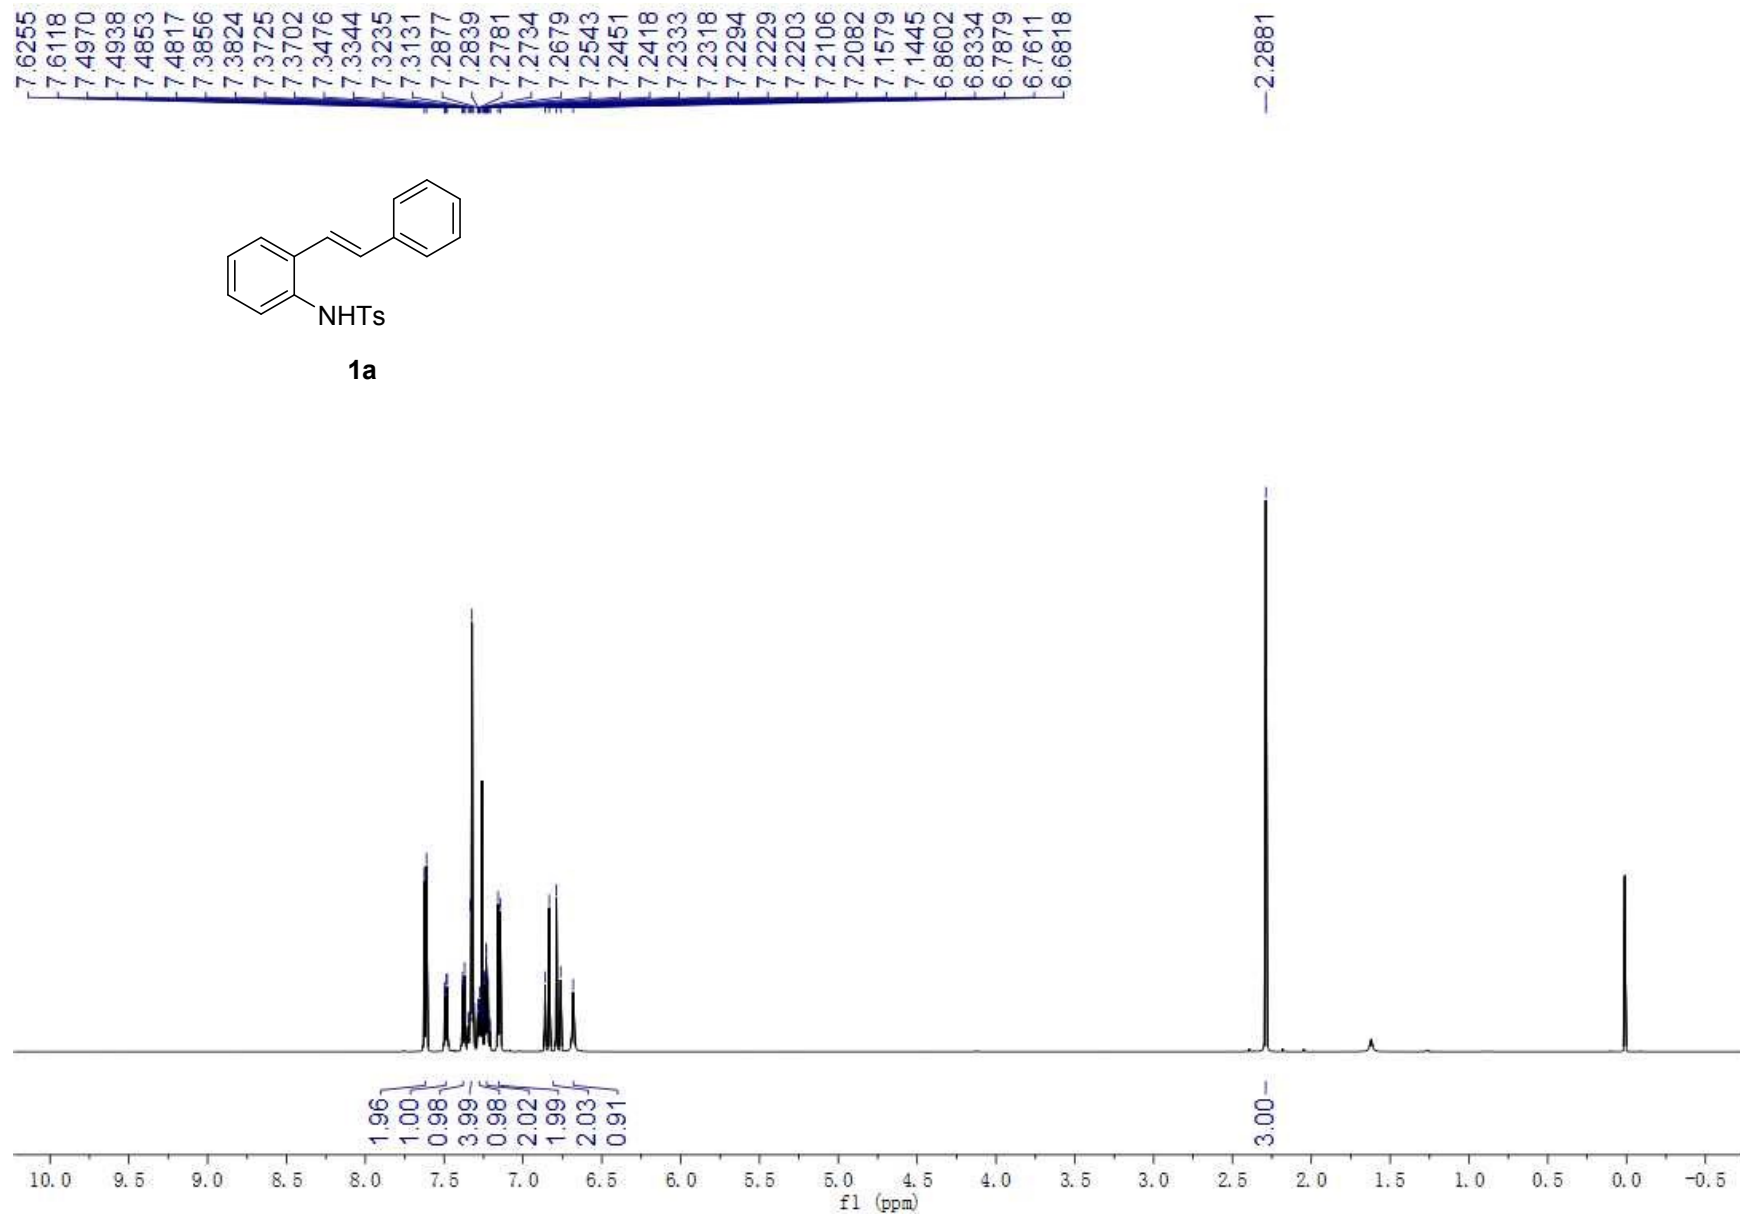



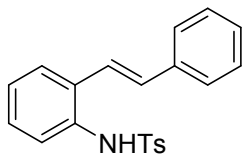

1a

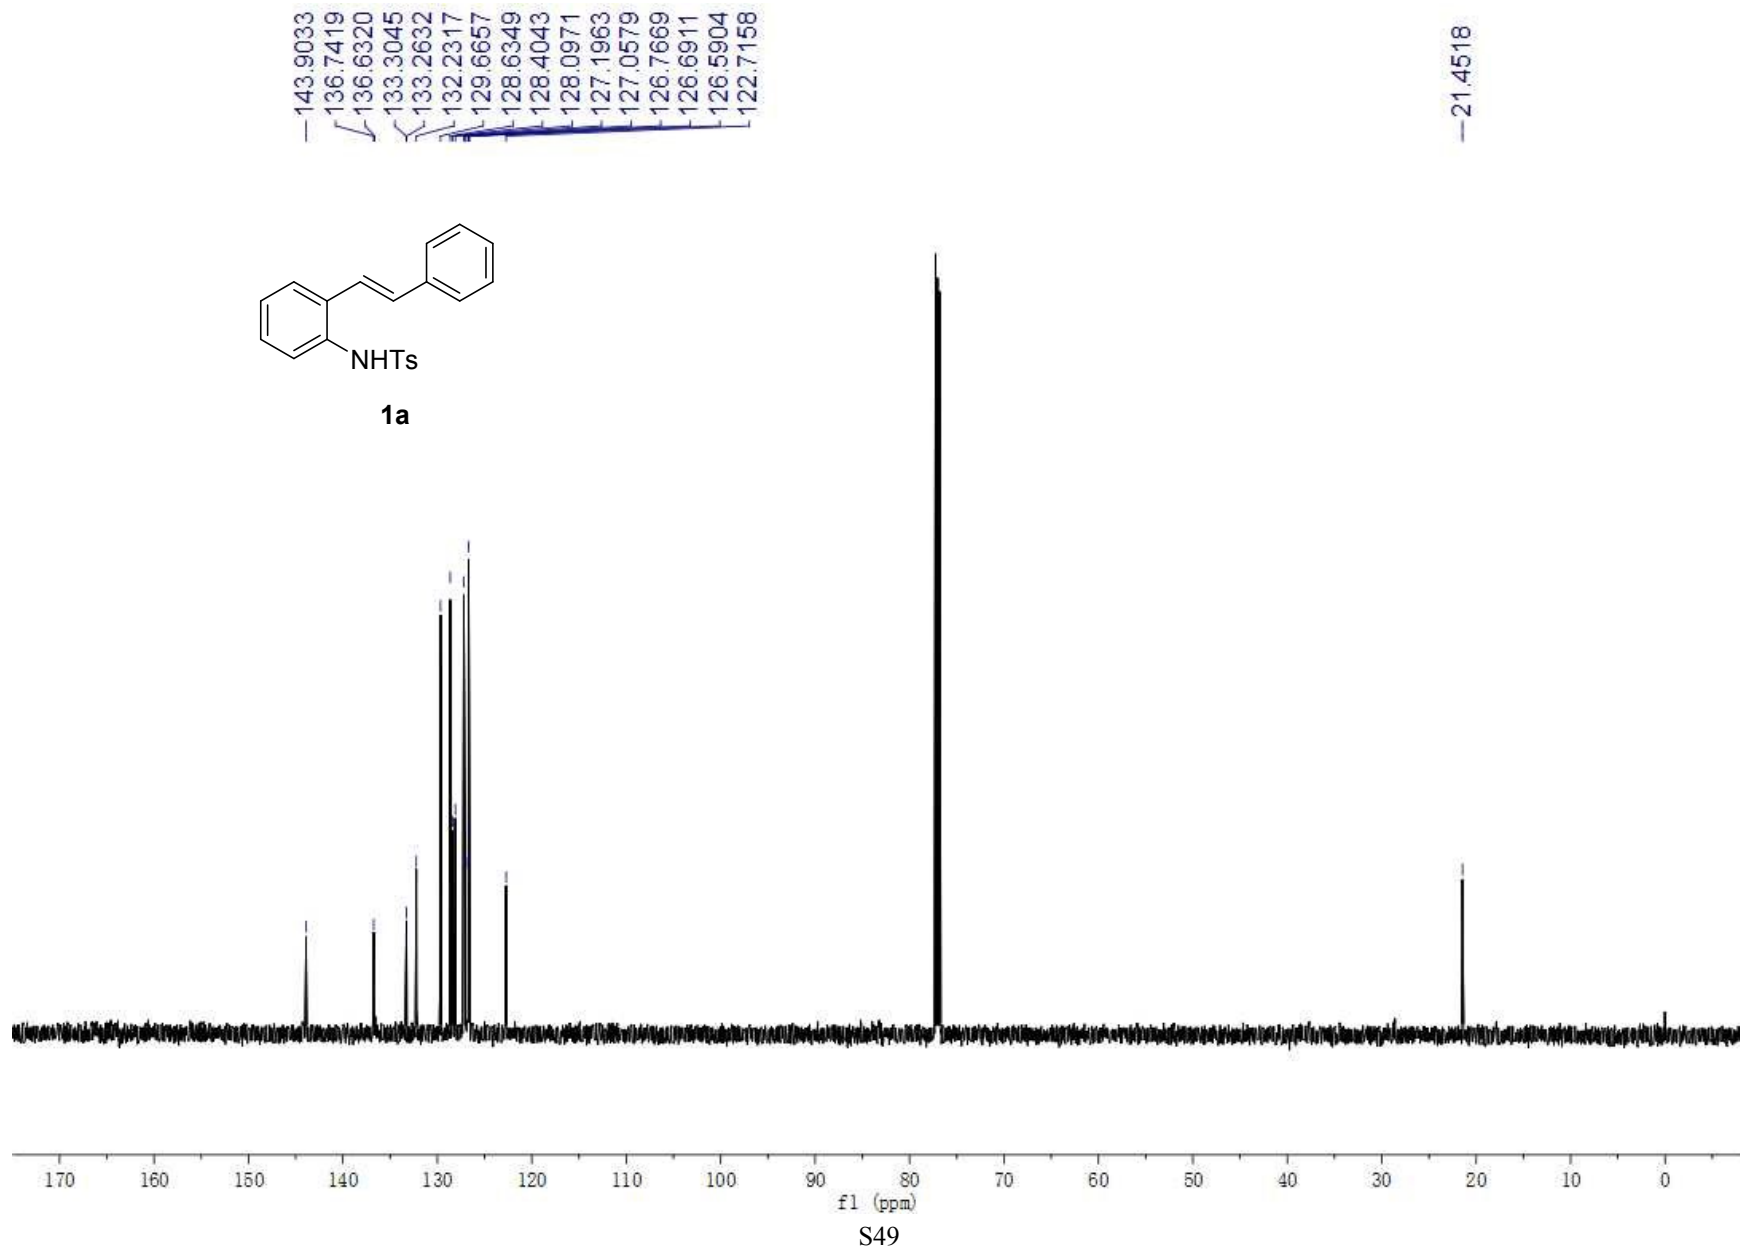

7.6622  
7.6485  
7.4106  
7.4002  
7.3963  
7.3859  
7.3513  
7.3382  
7.3257  
7.3199  
7.3081  
7.2938  
7.2820  
7.2695  
7.2012  
7.1973  
7.1853  
7.1809  
6.9176  
6.9133  
6.9037  
6.8996  
6.8900  
6.8858  
6.7512  
6.7233  
6.7117  
6.6852

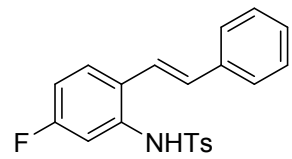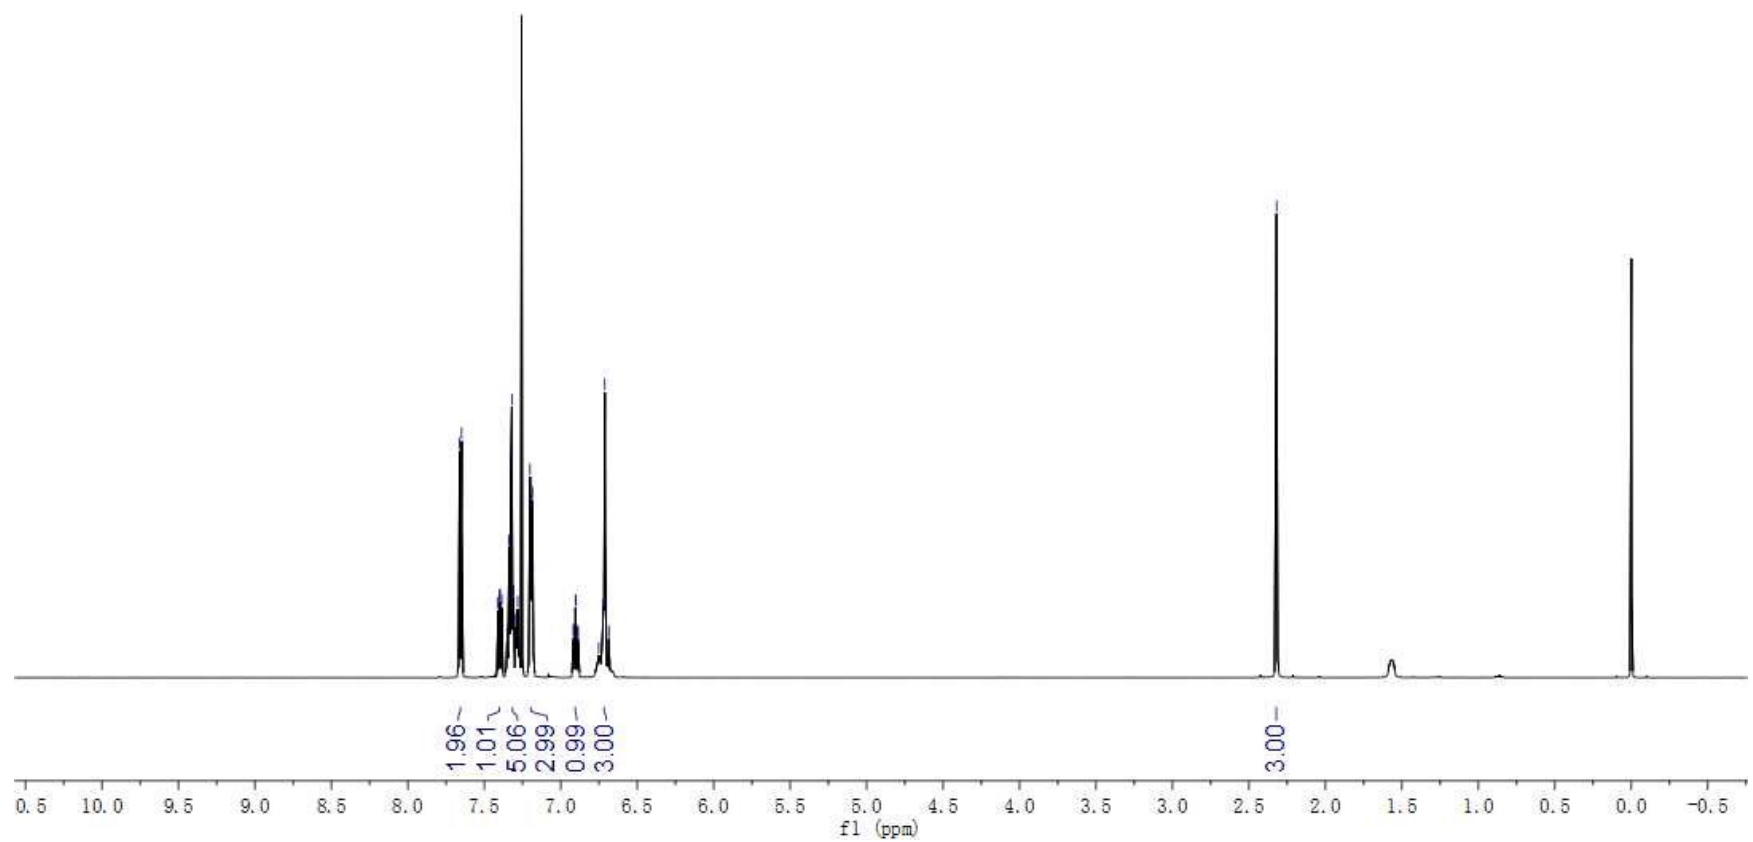

S50

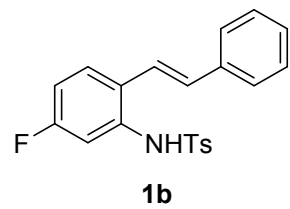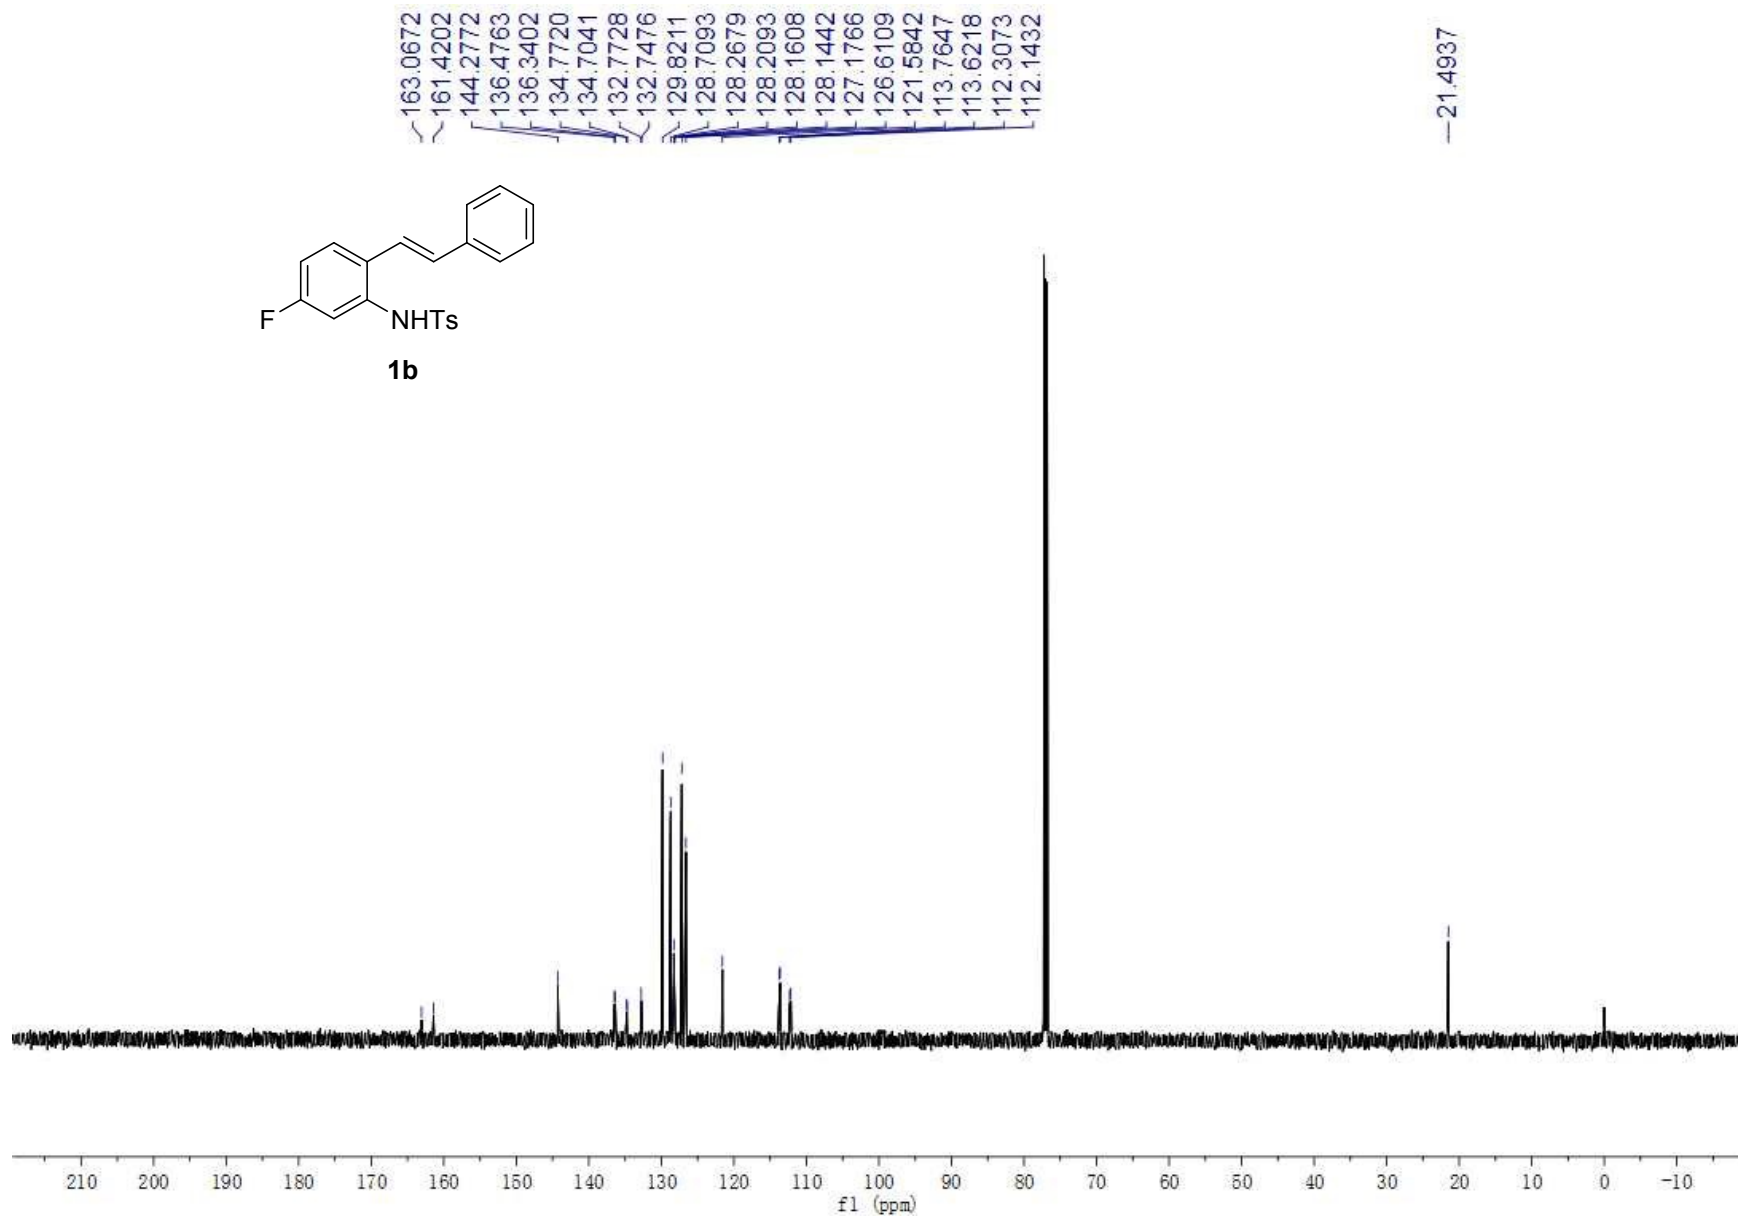

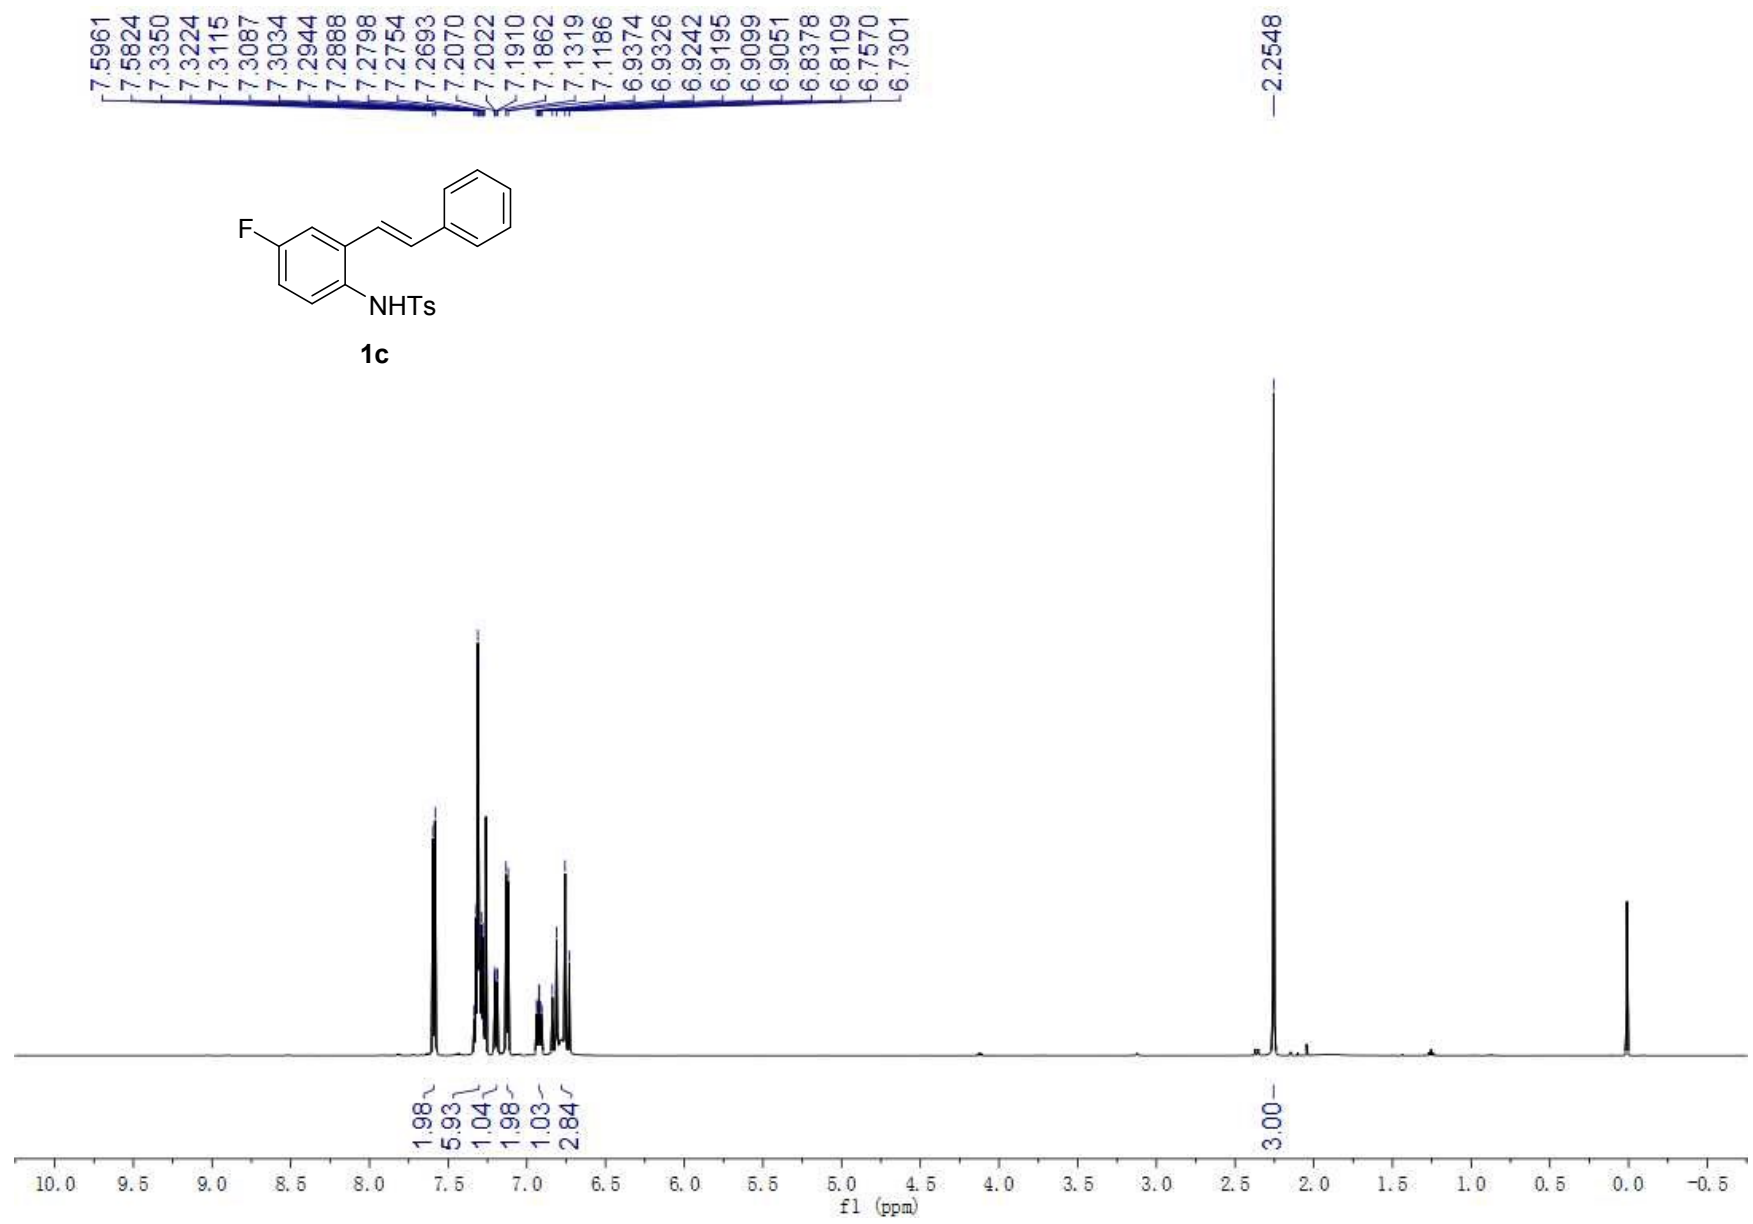

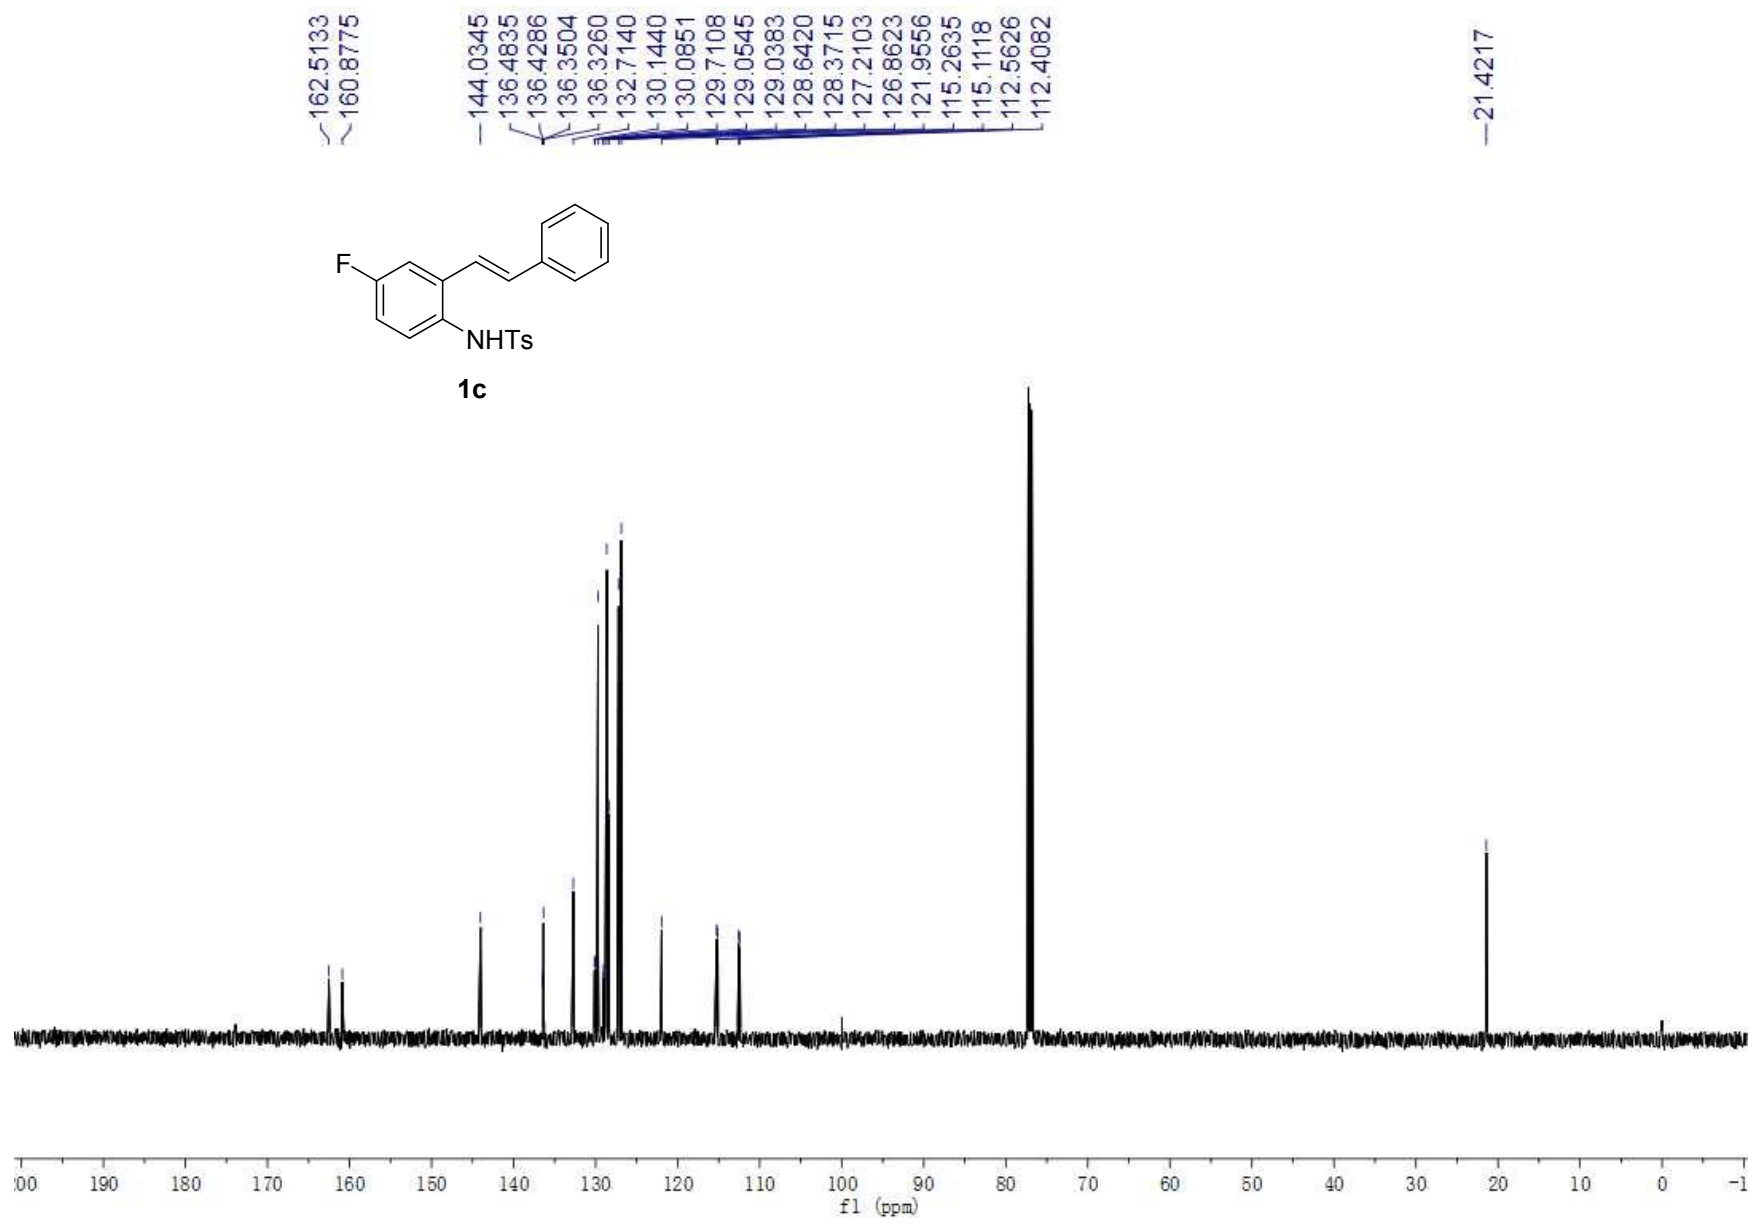

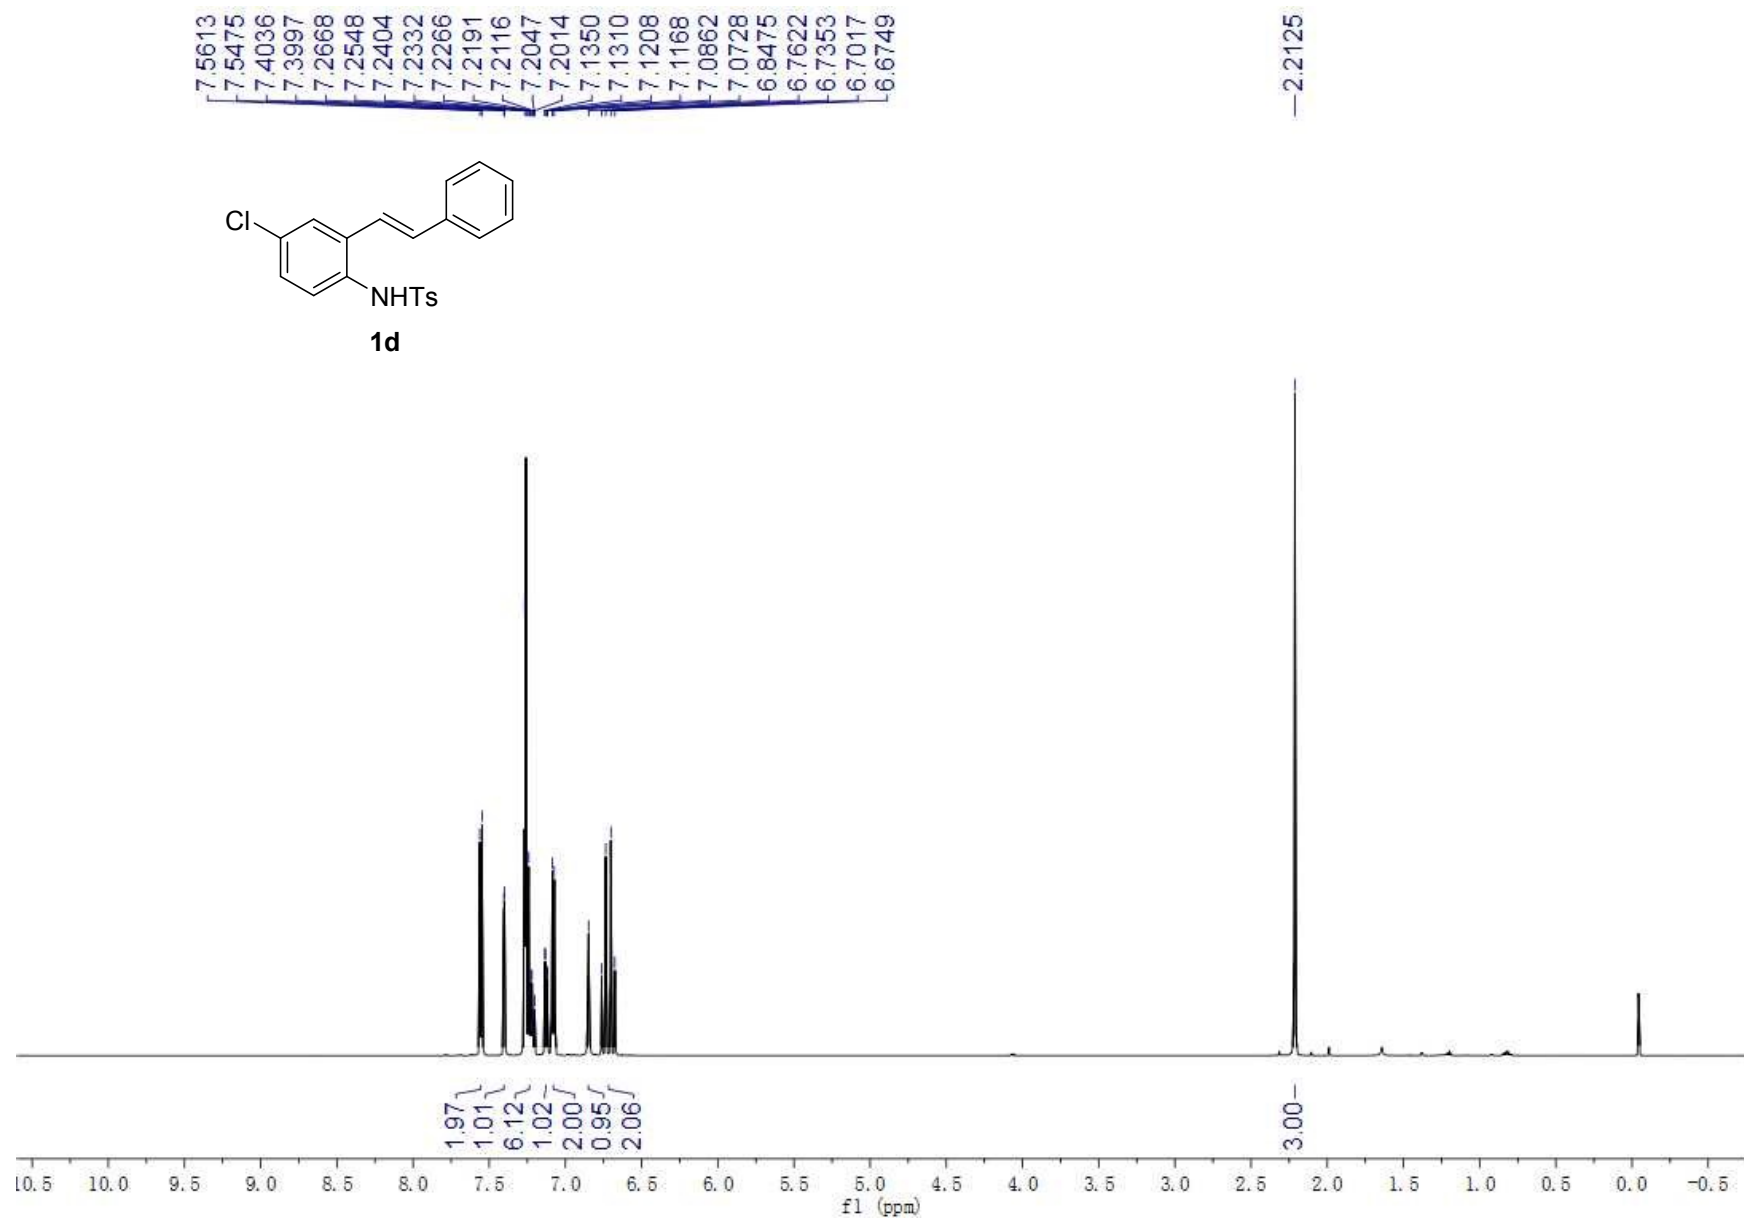

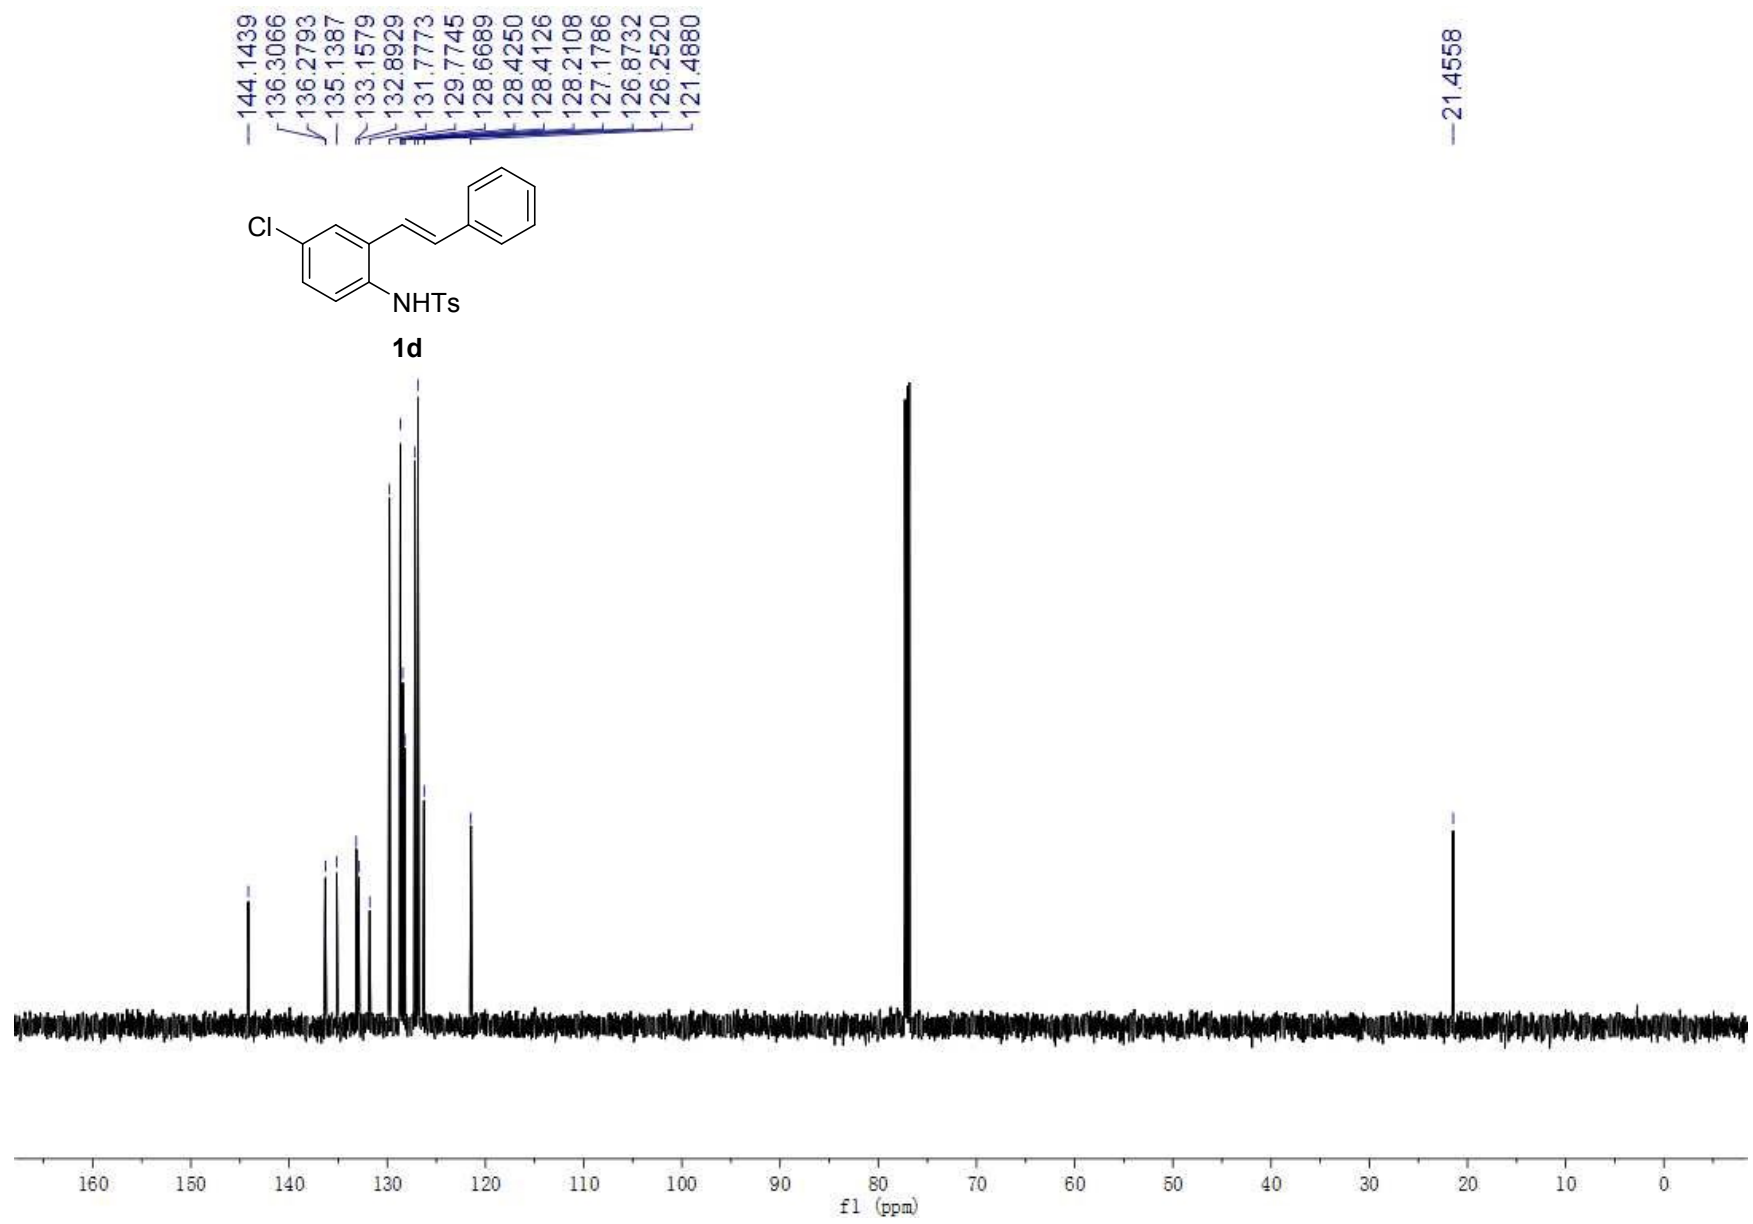

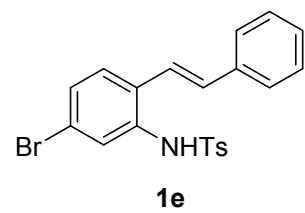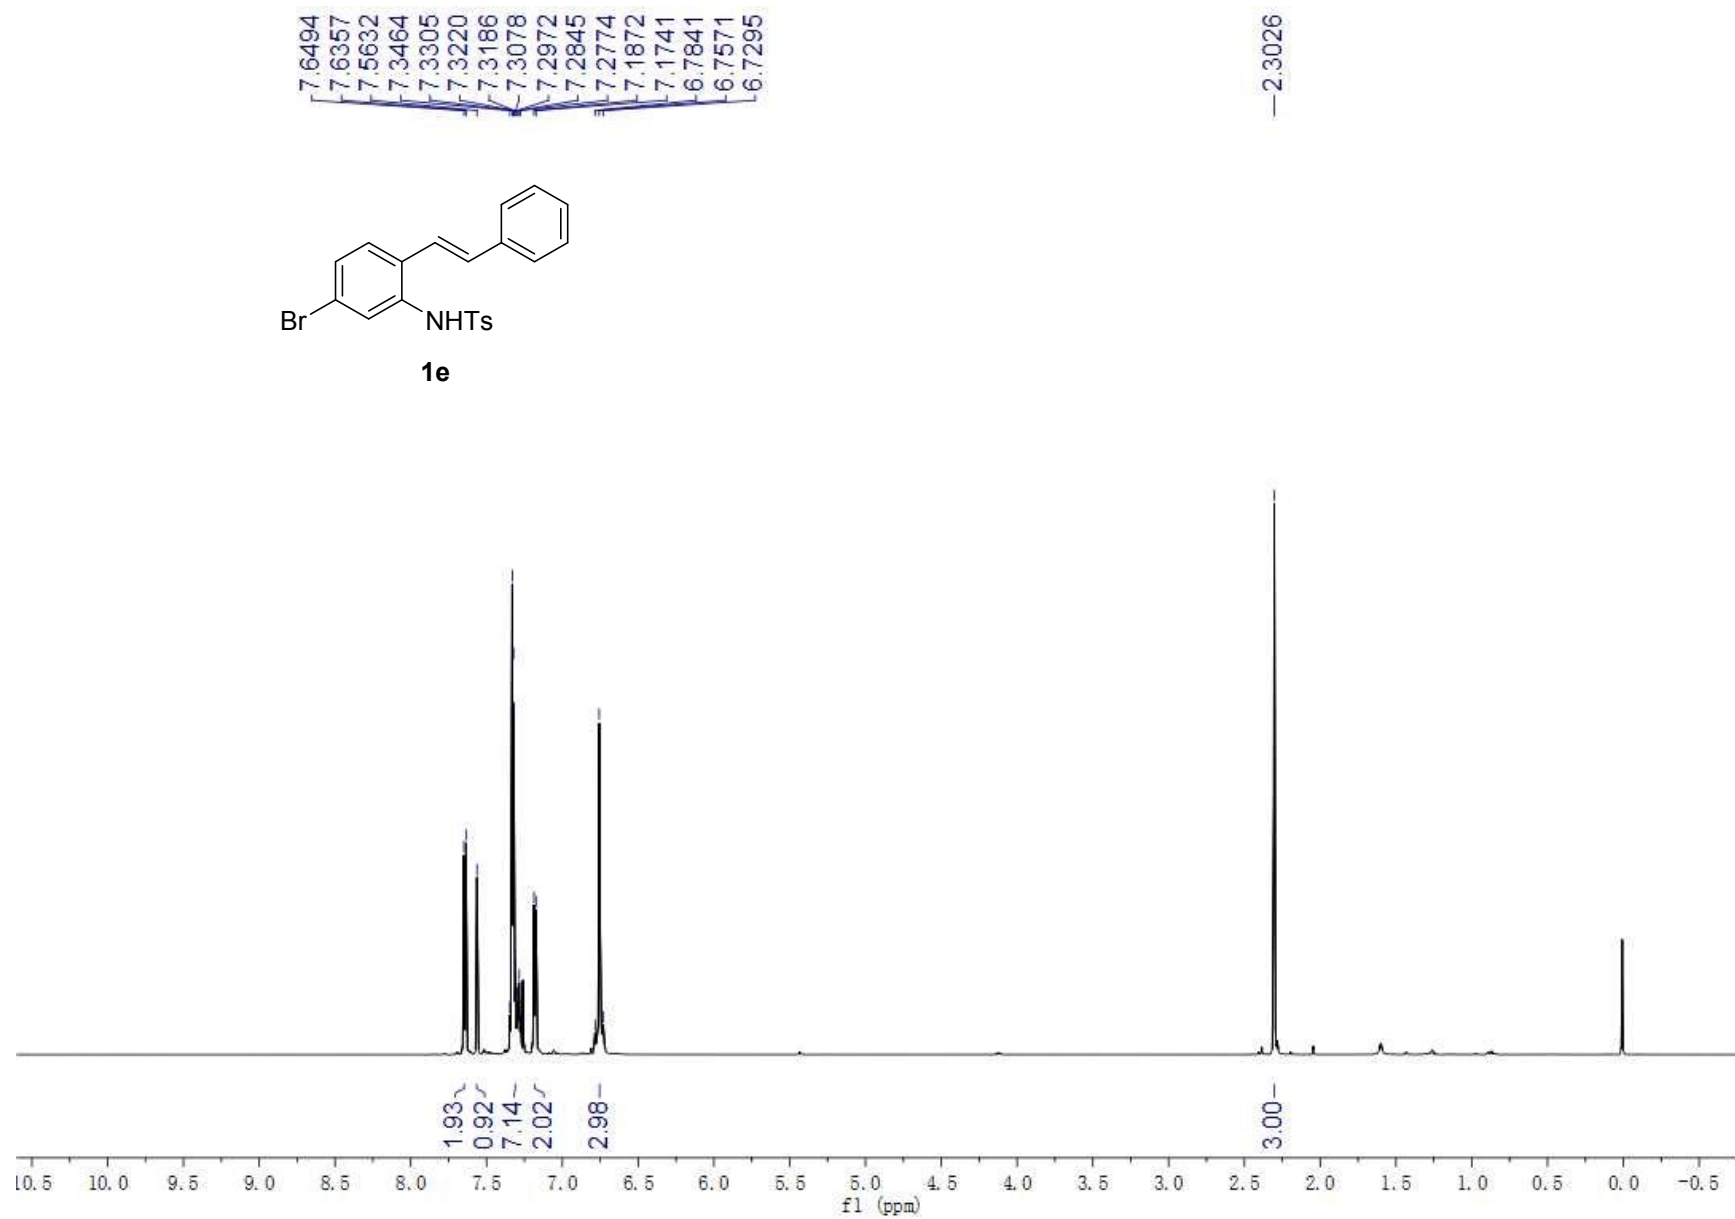



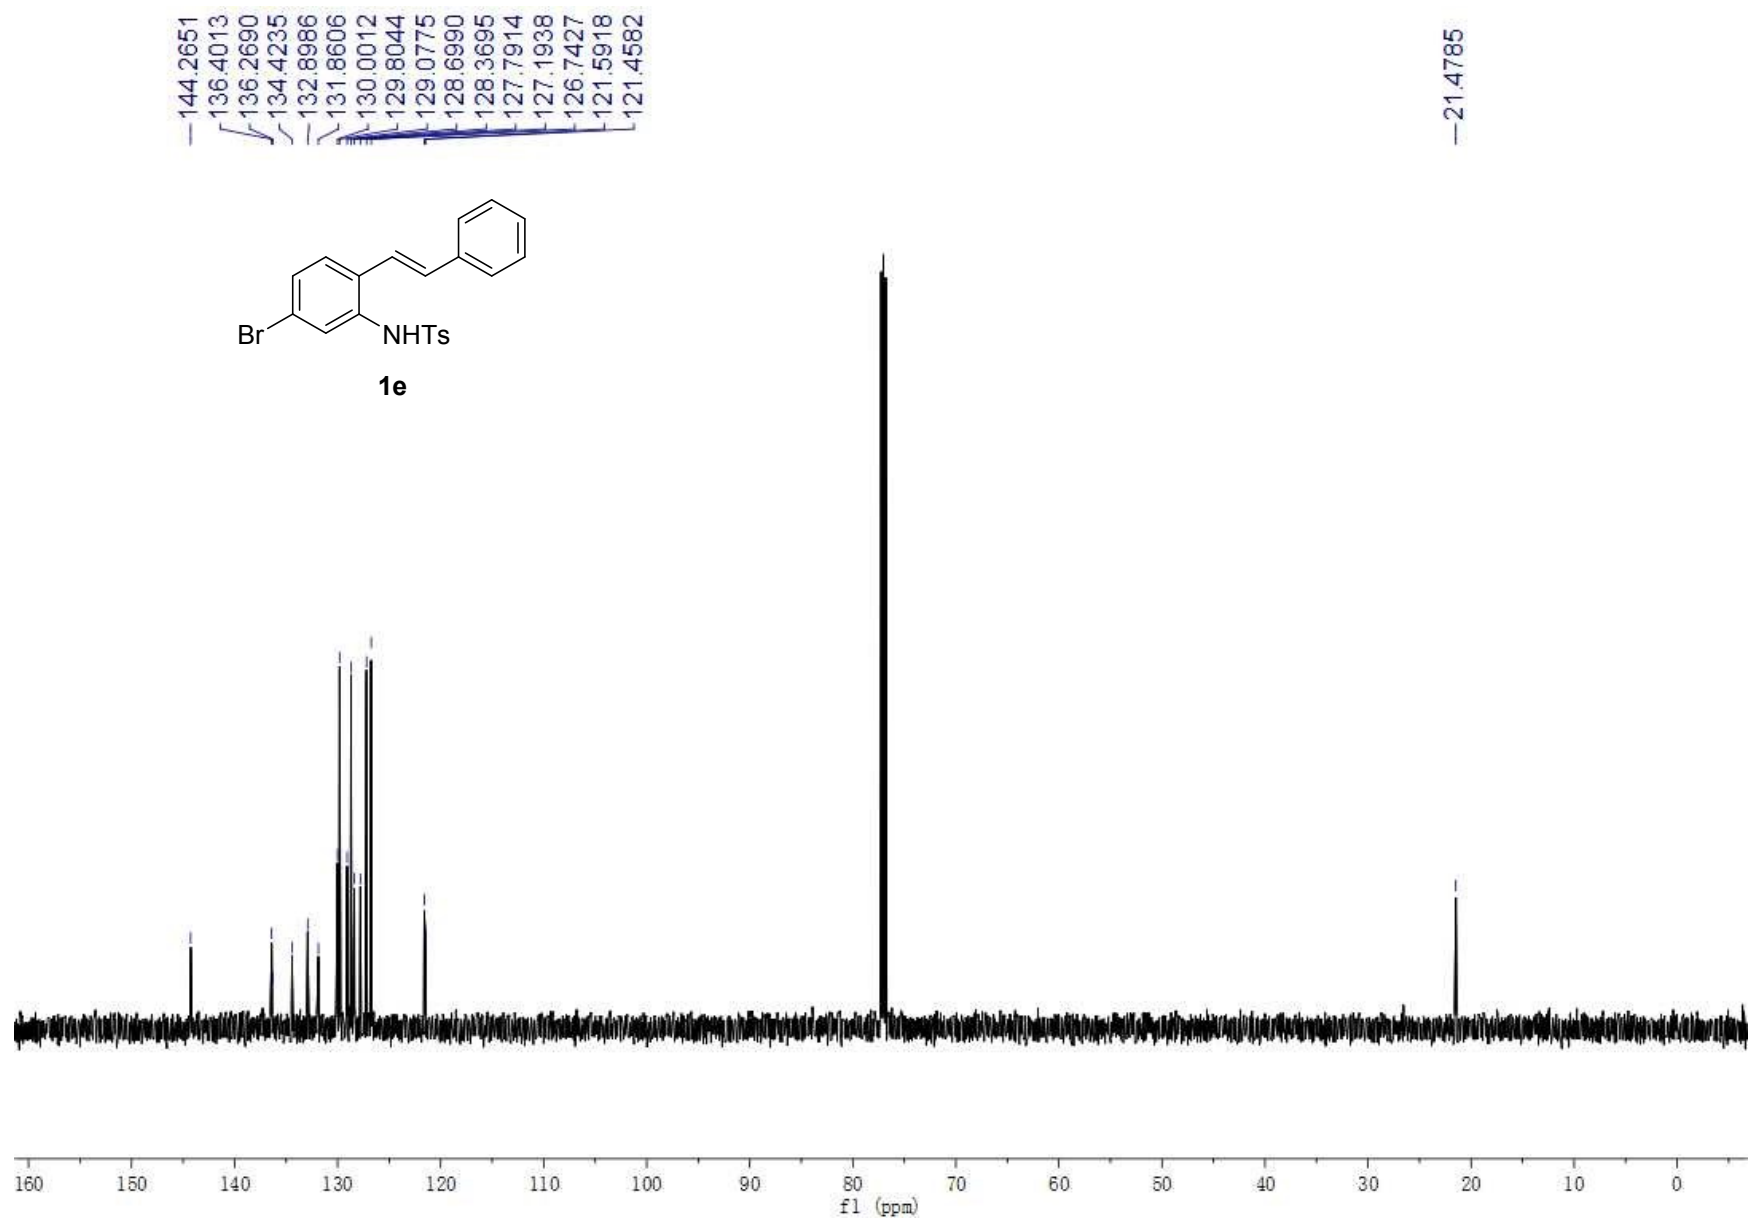

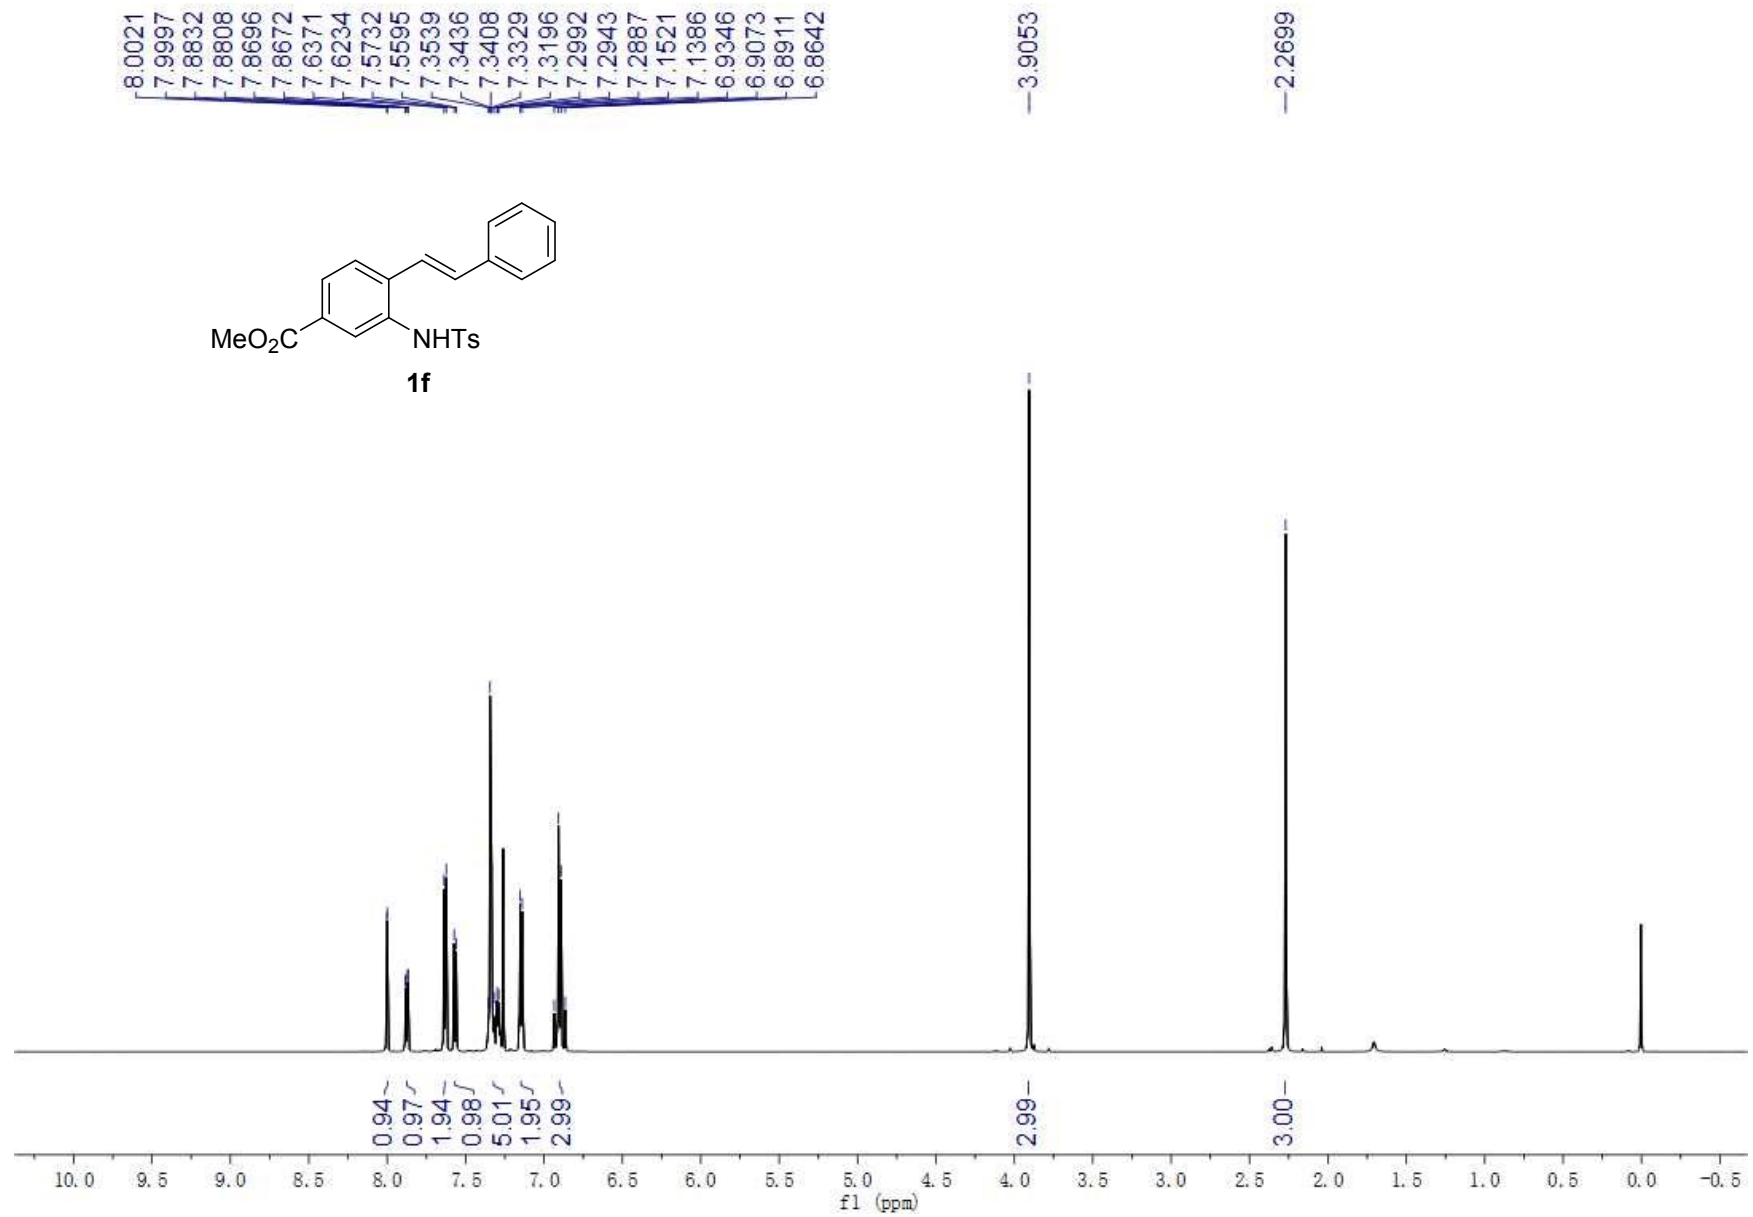

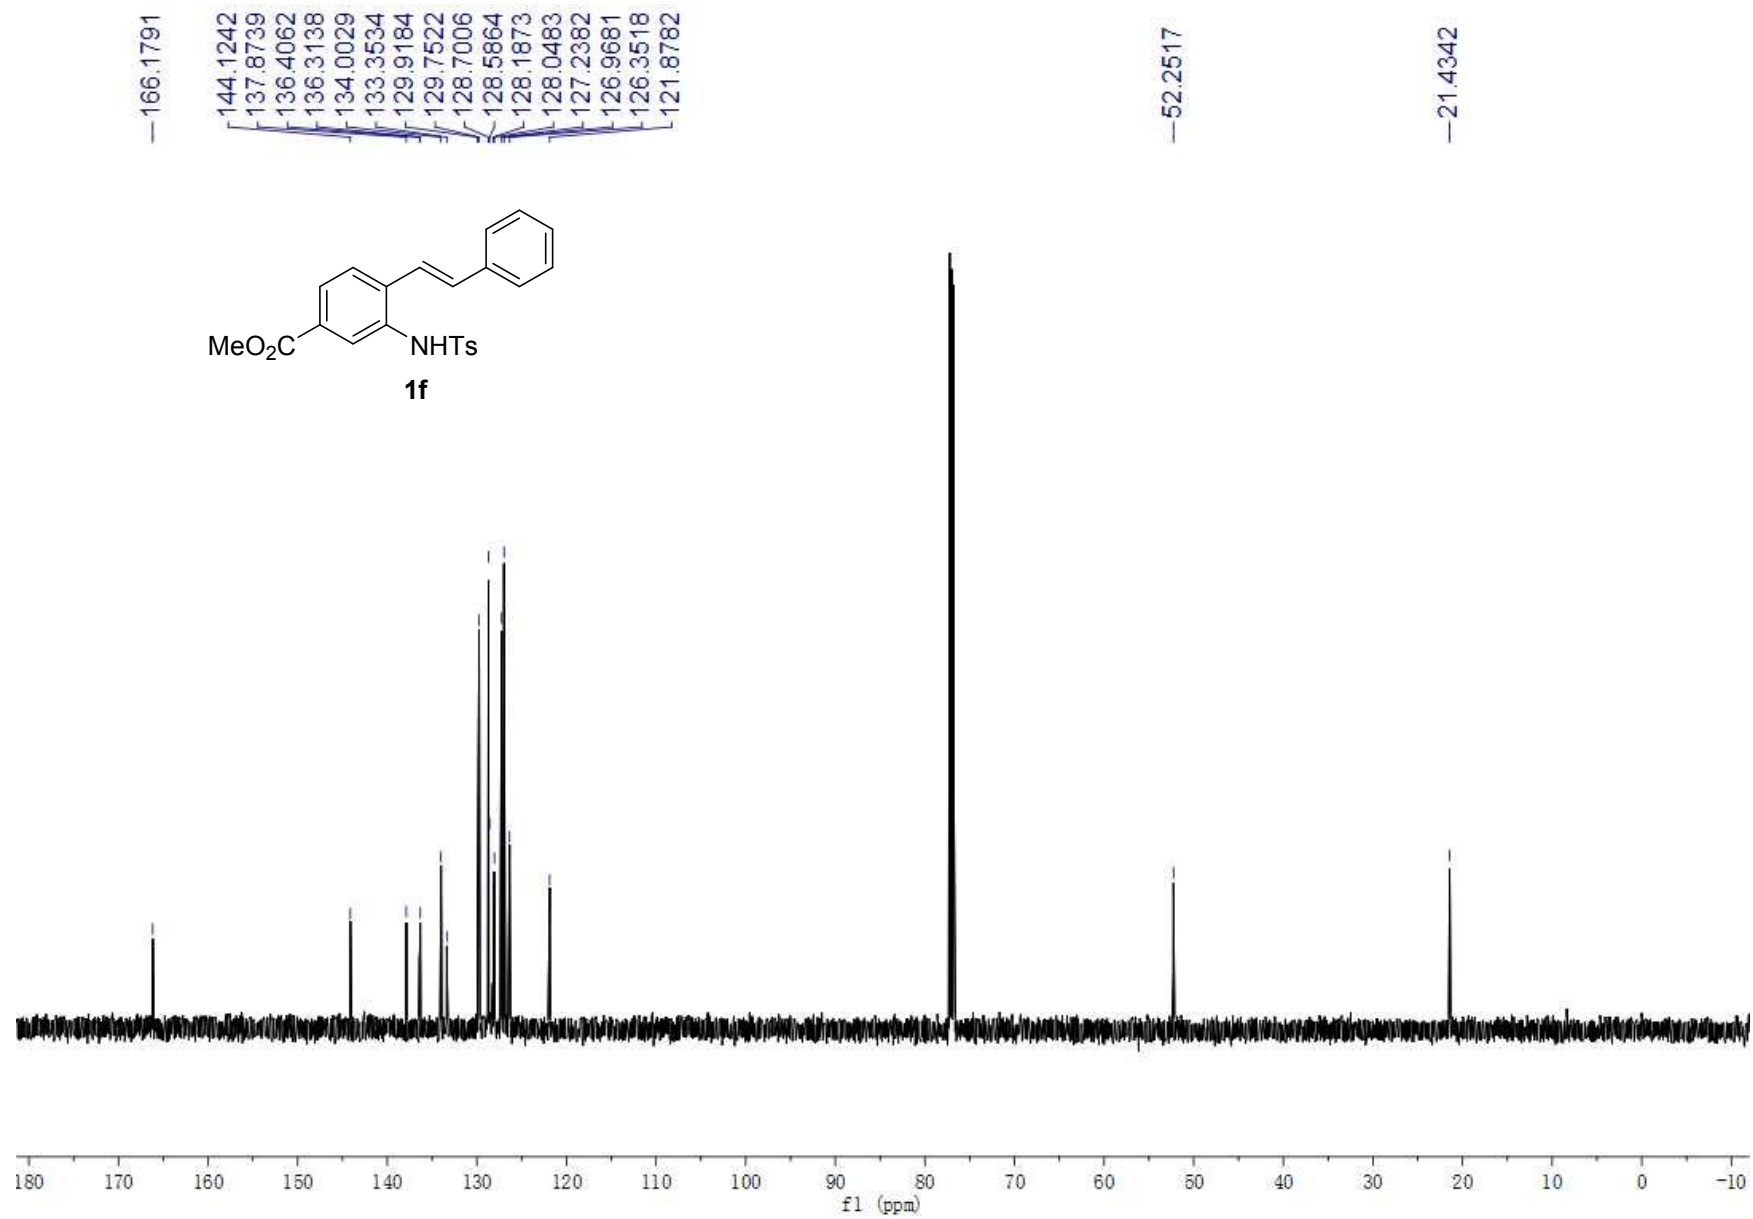

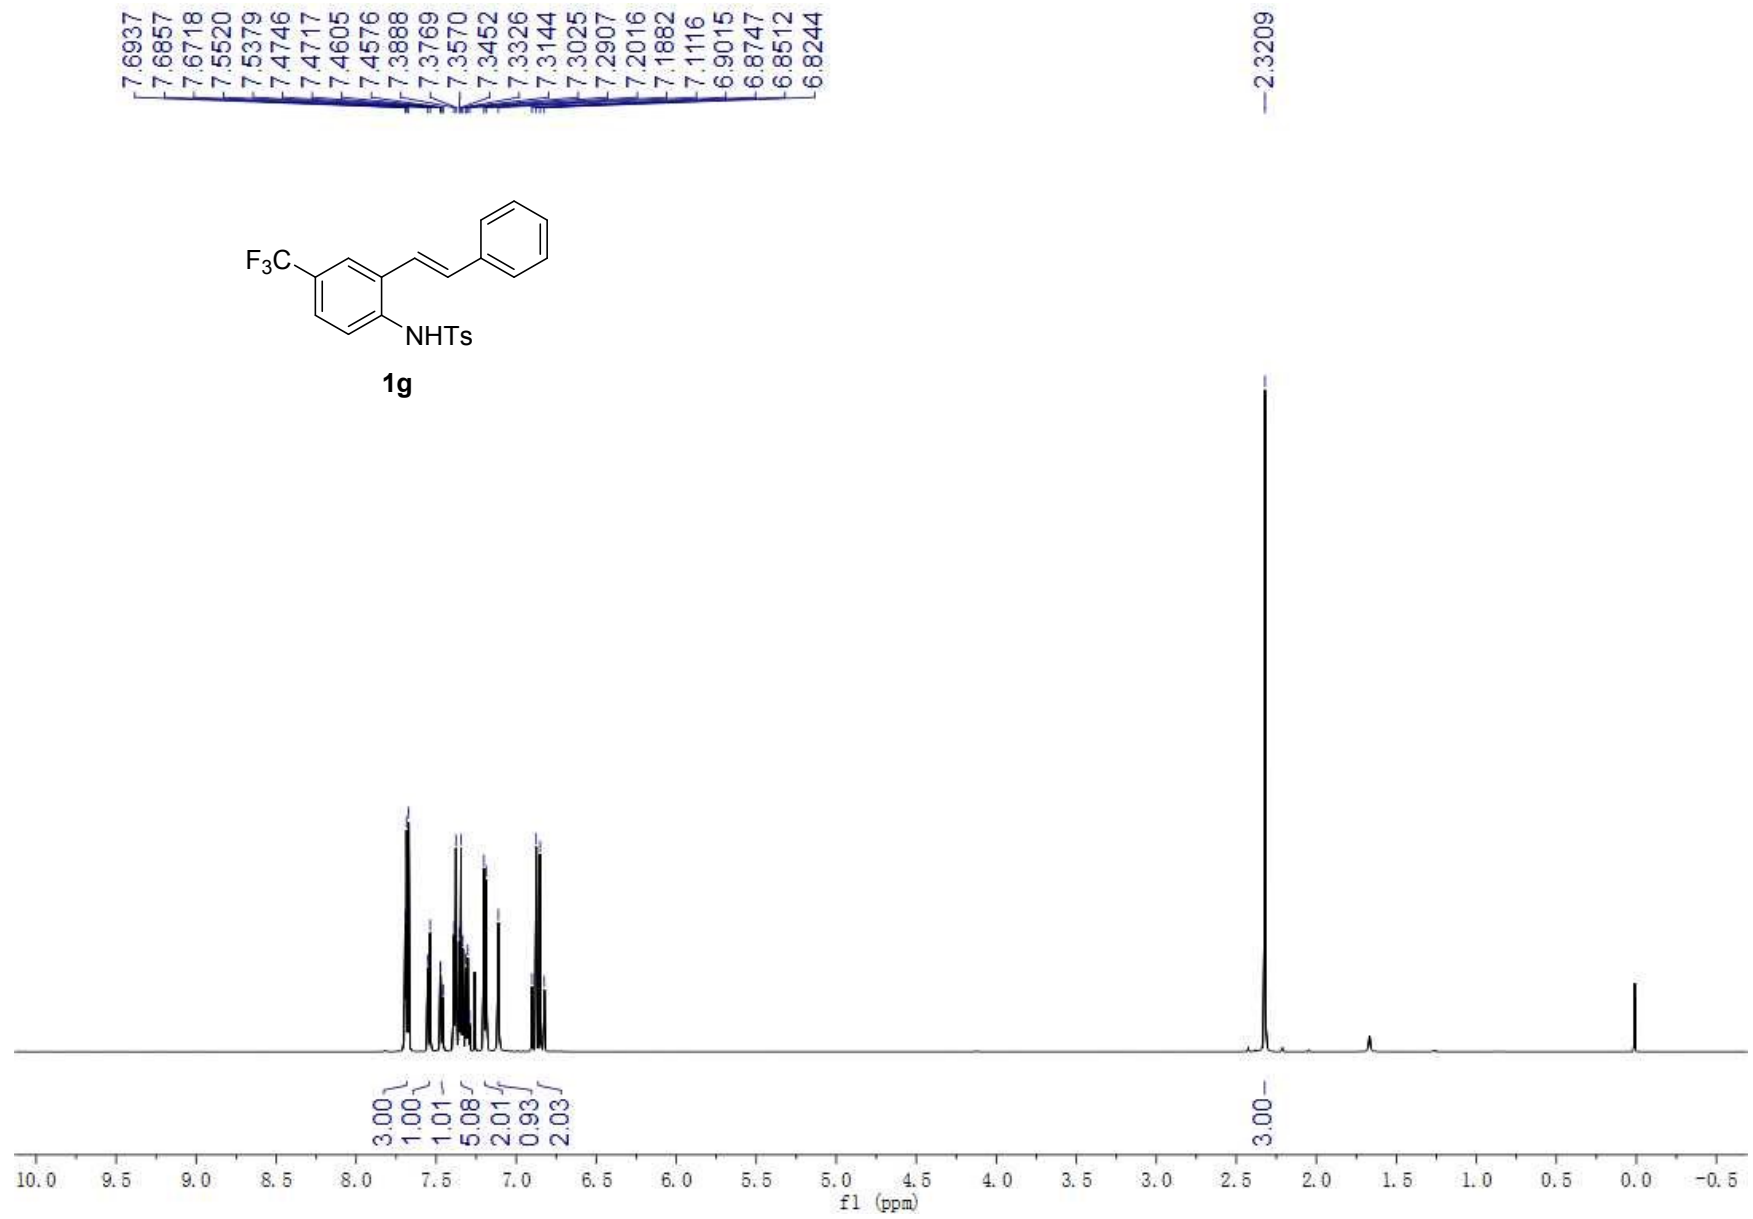

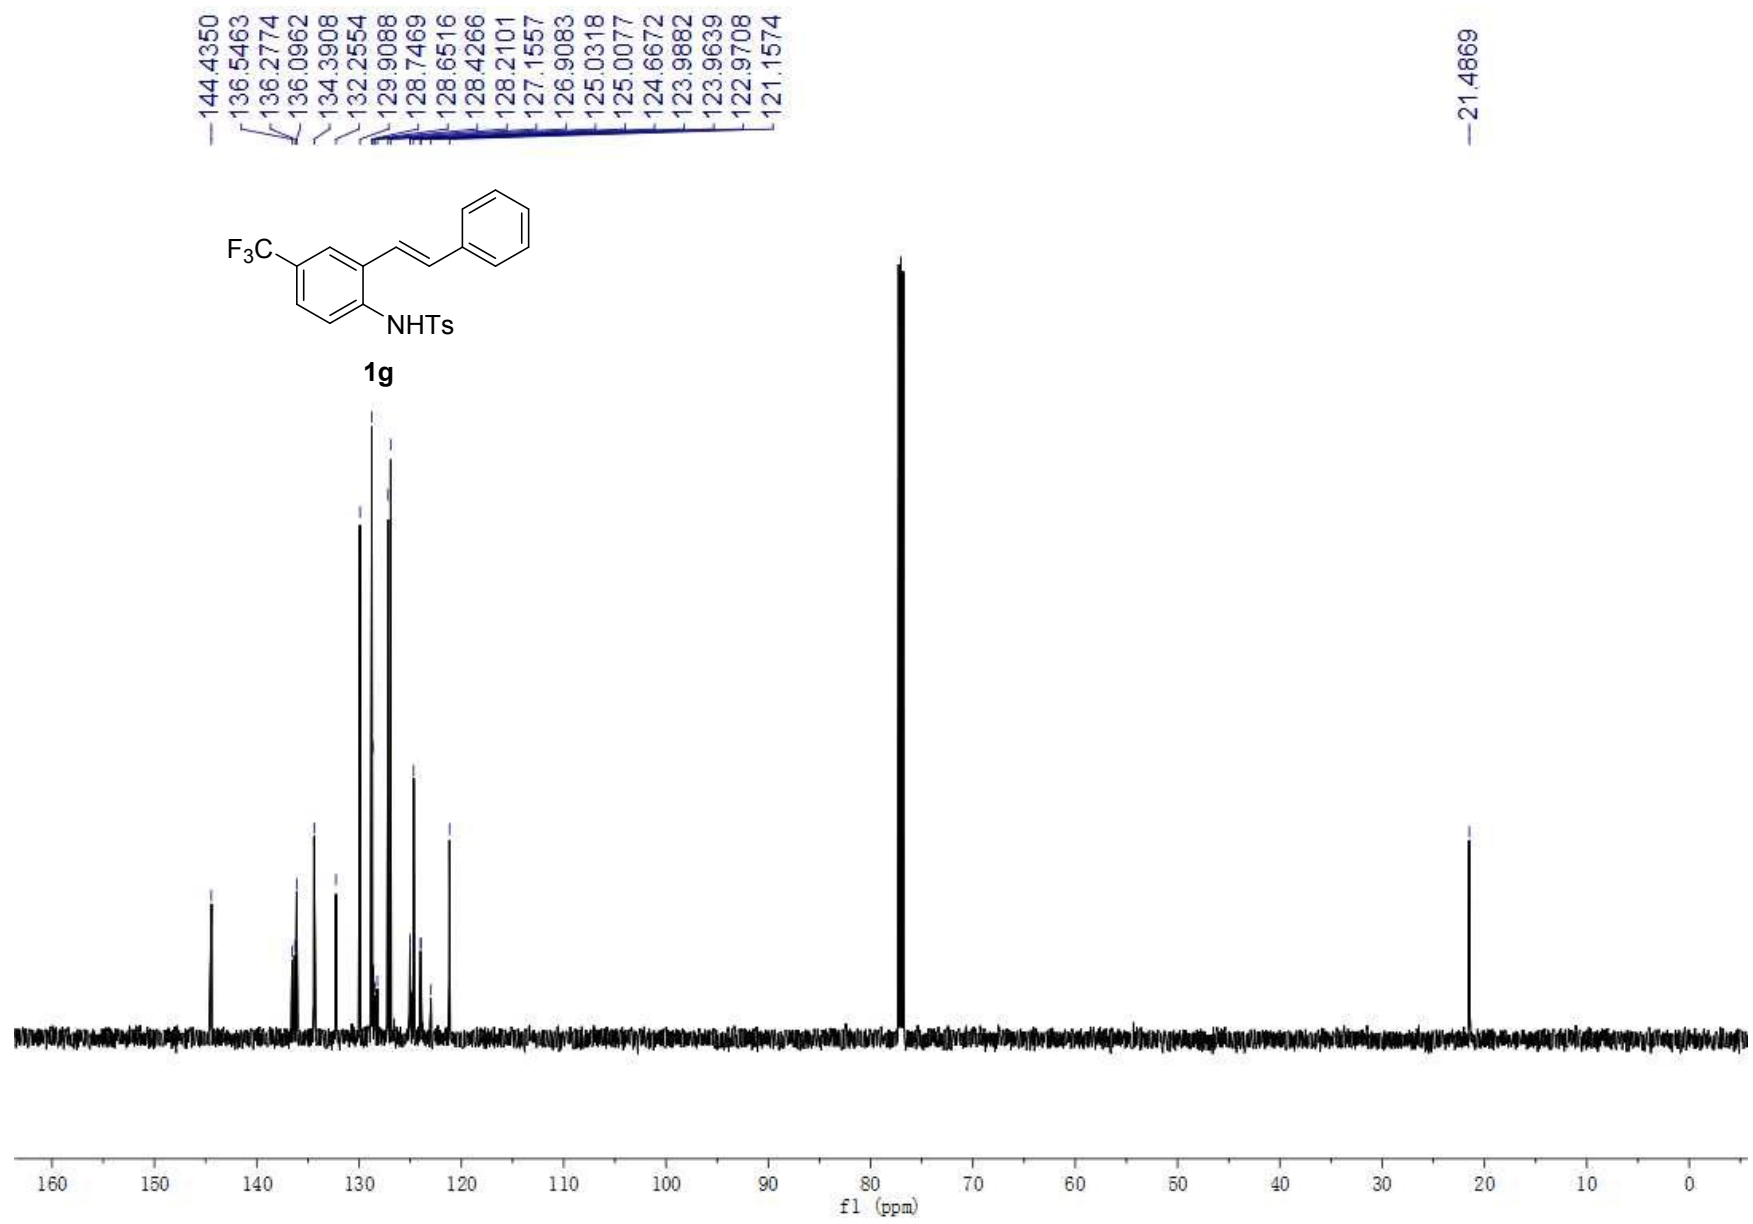

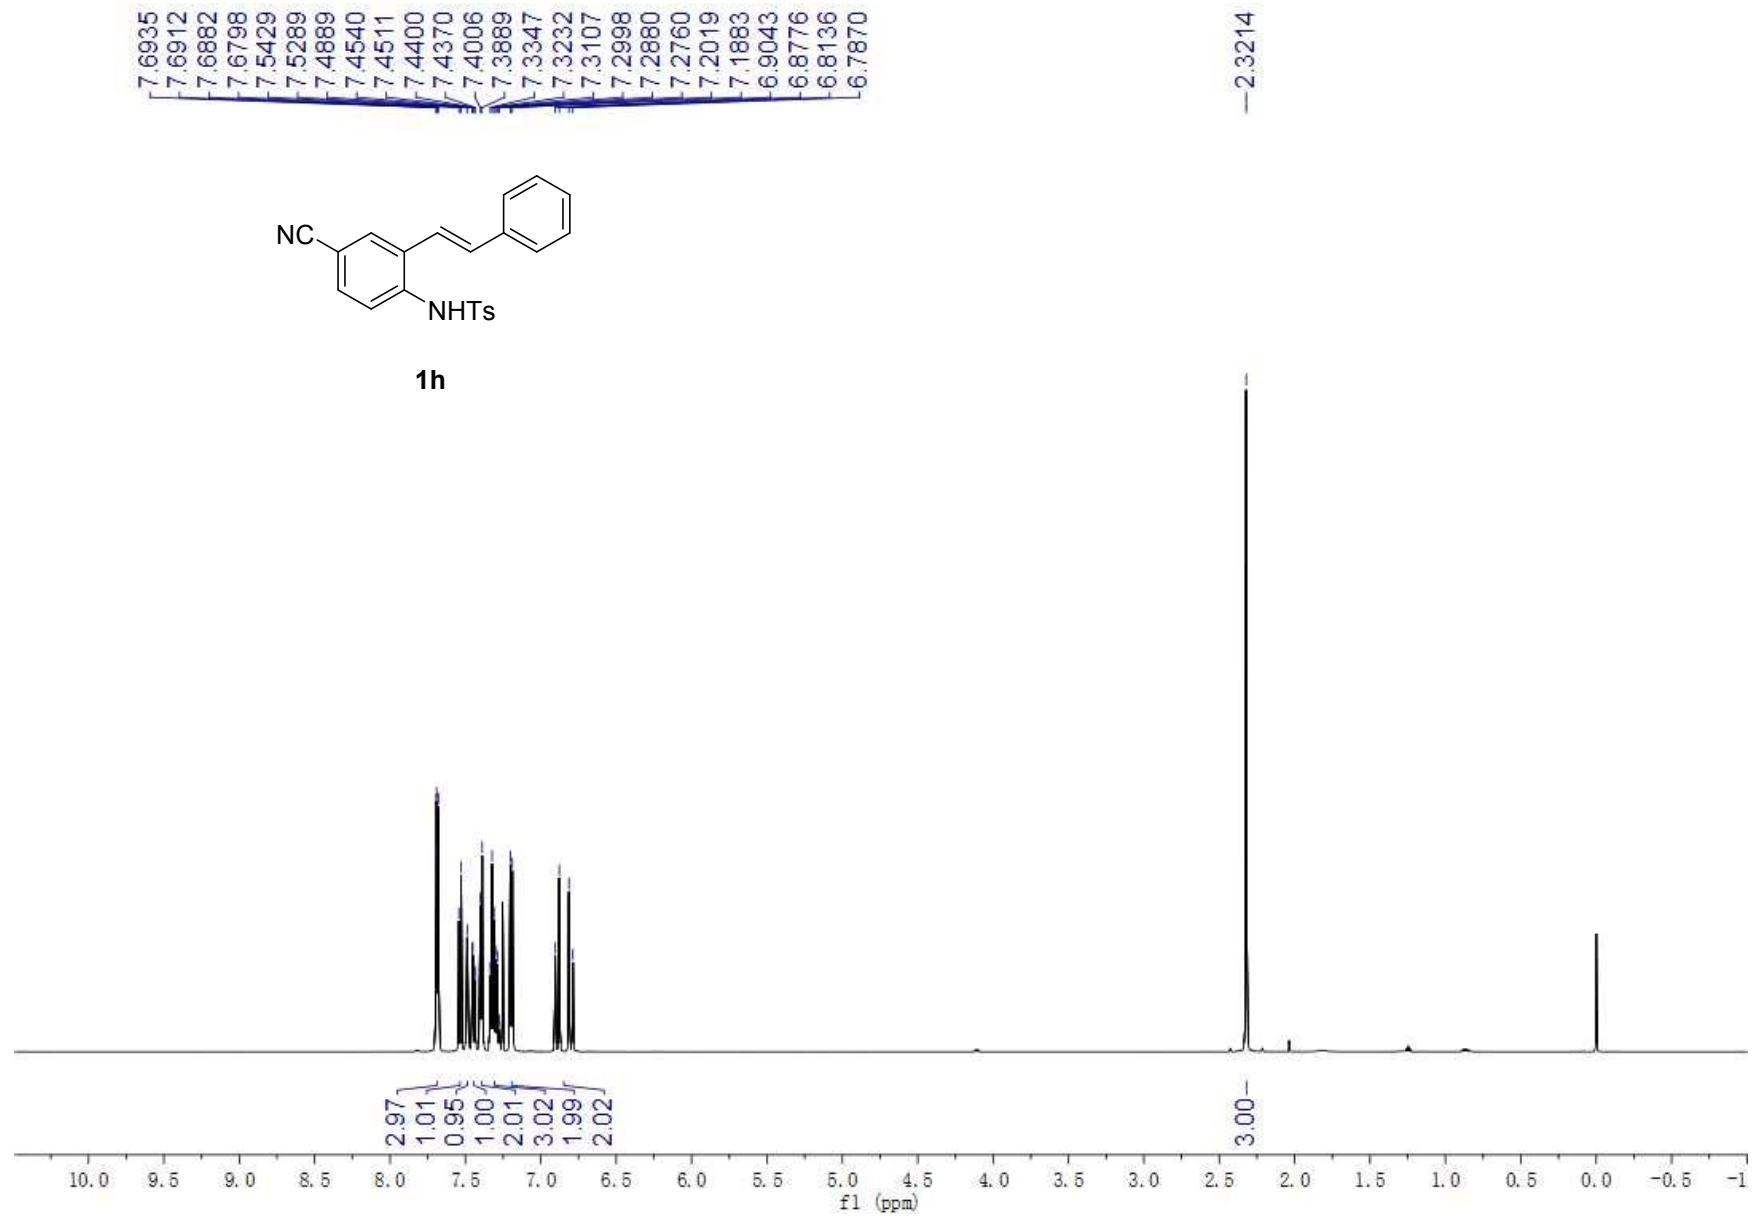

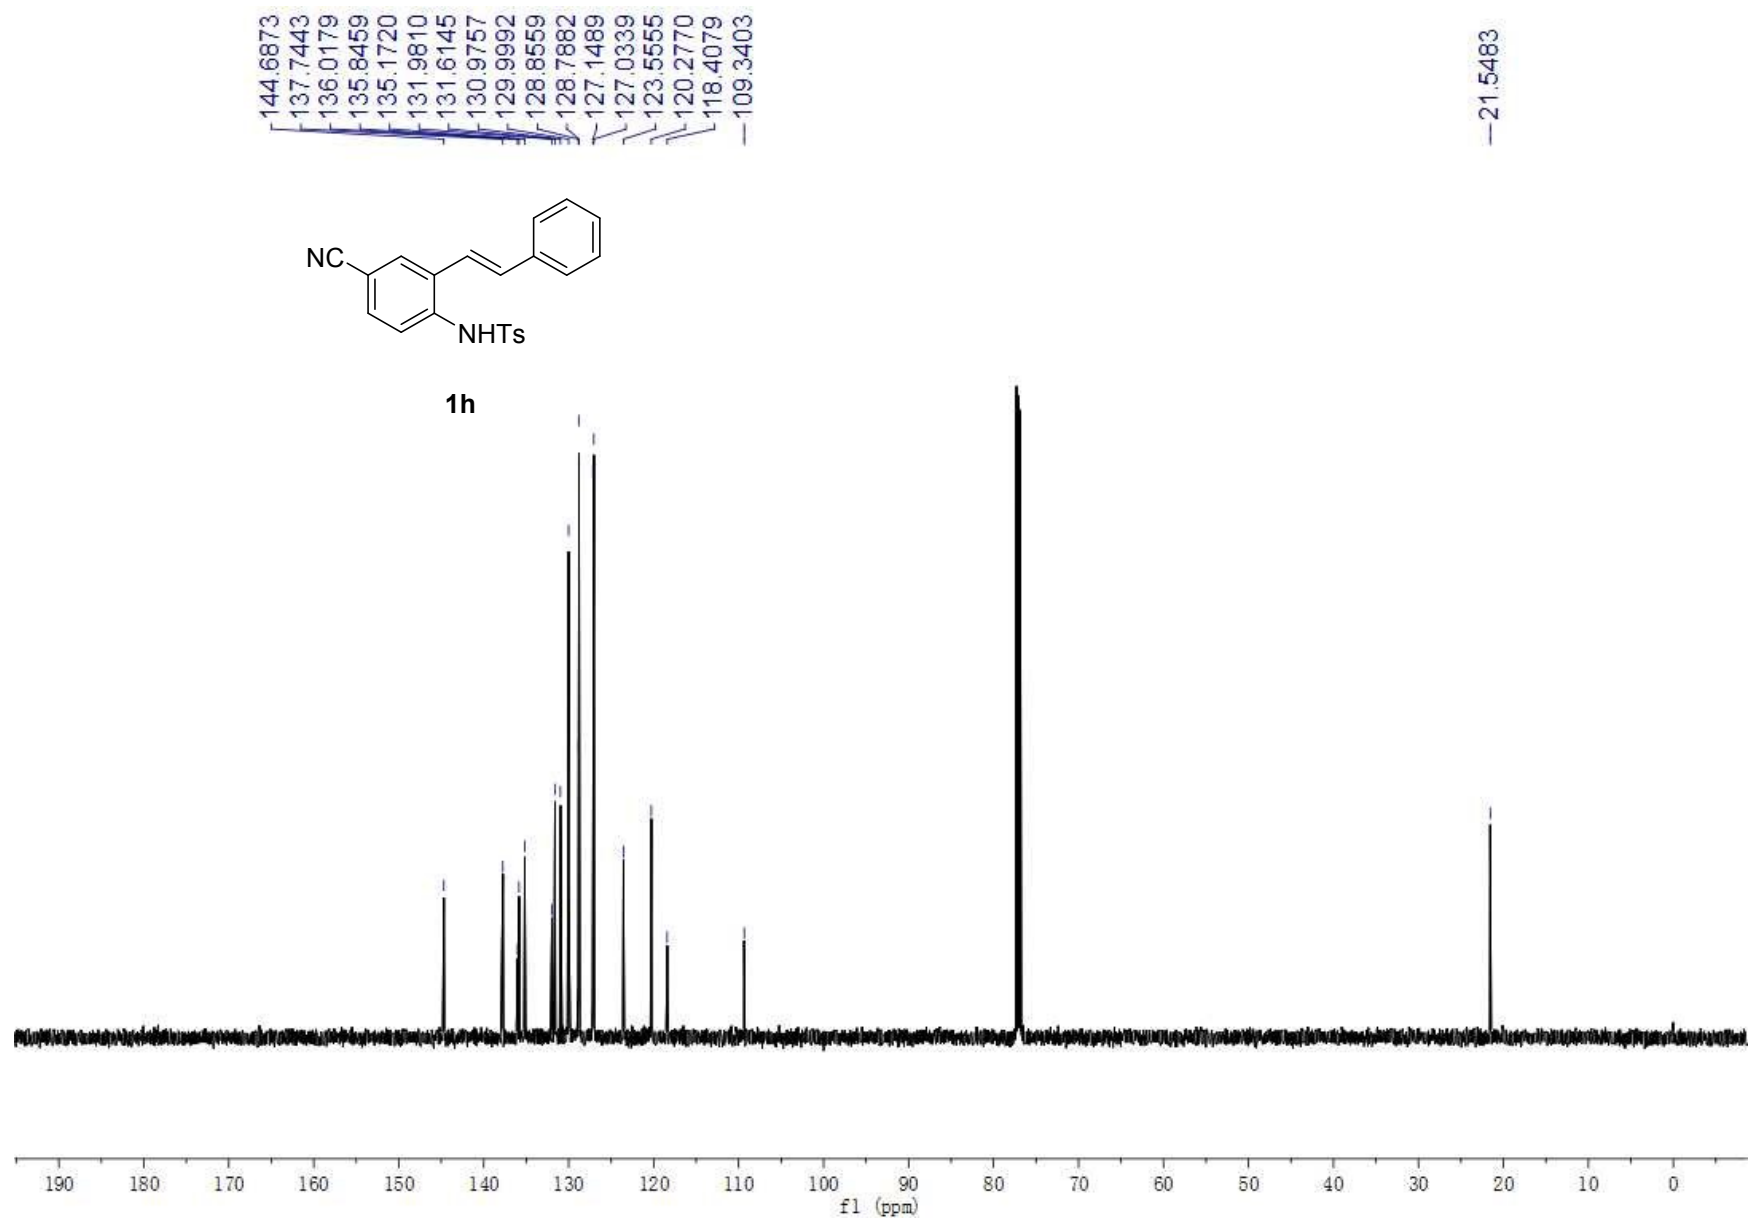

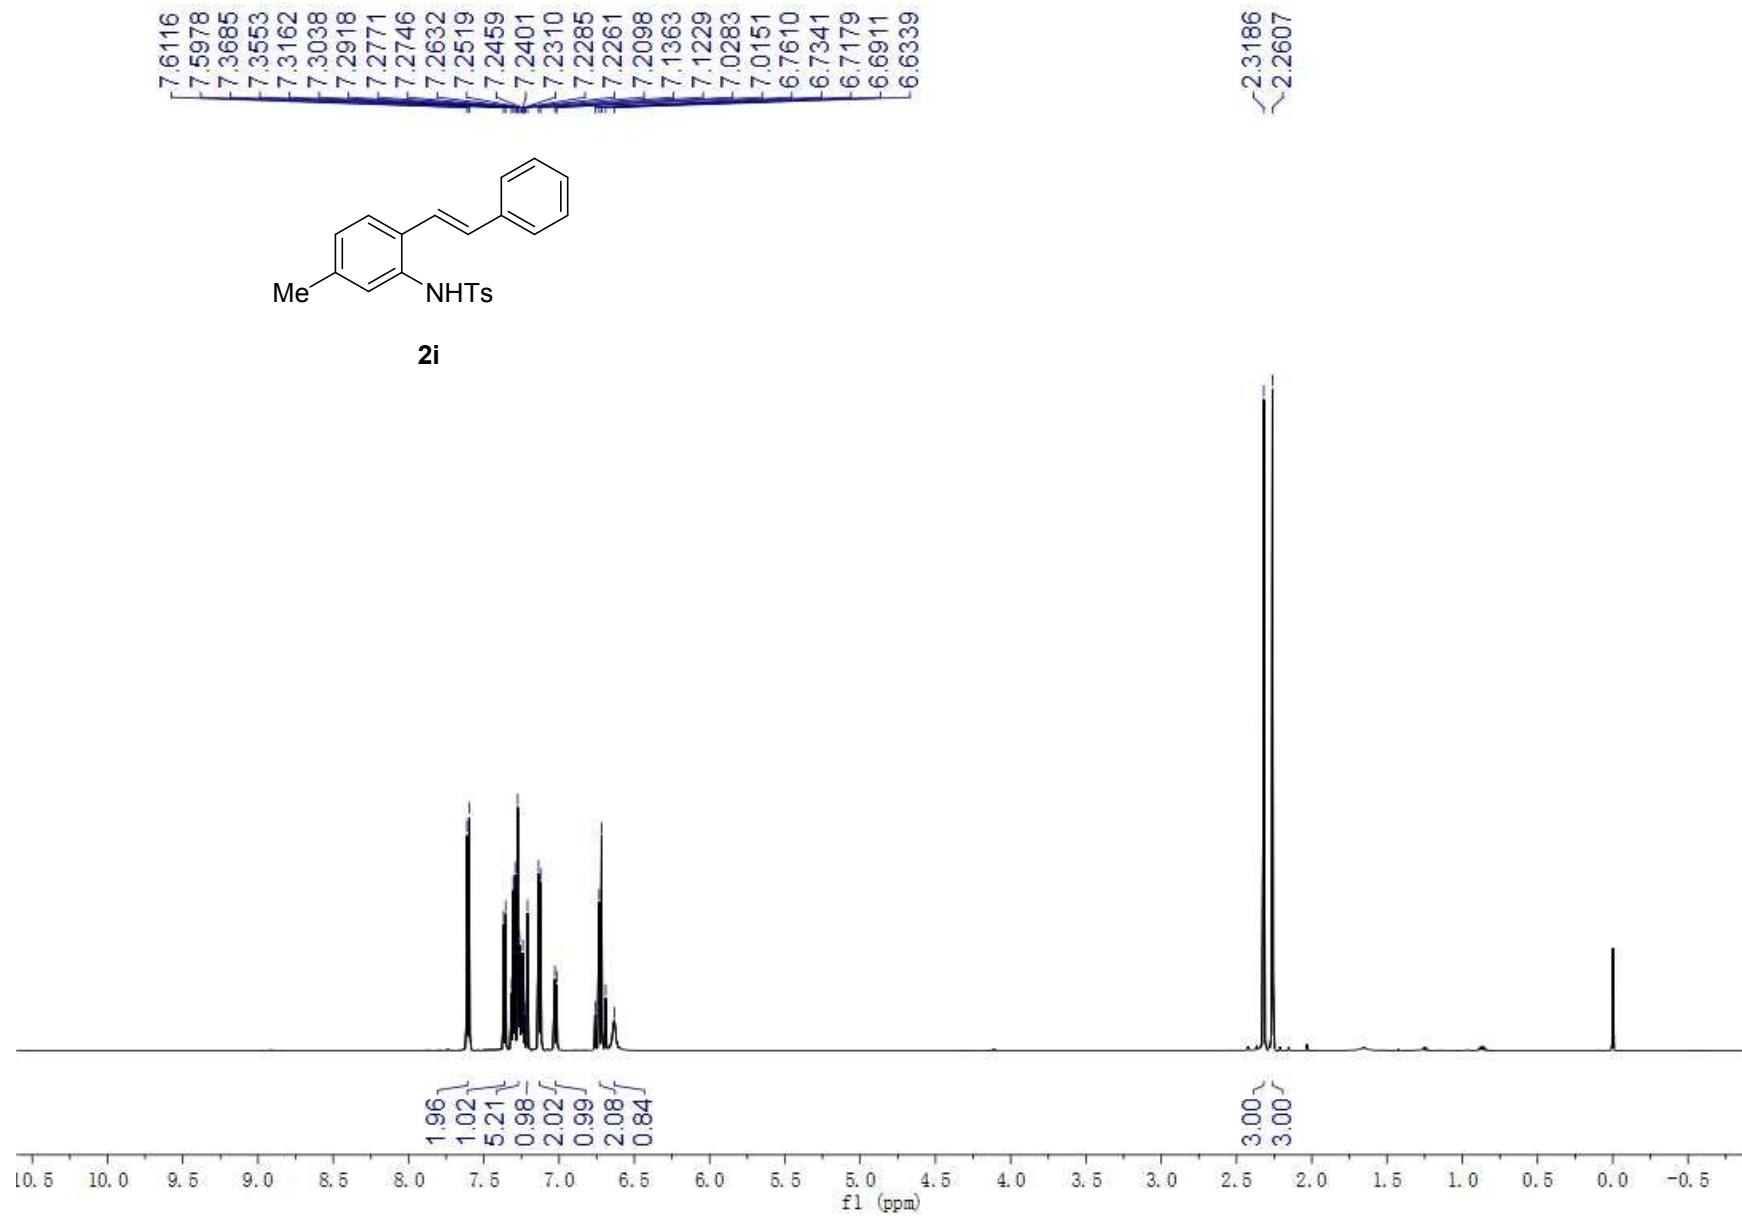



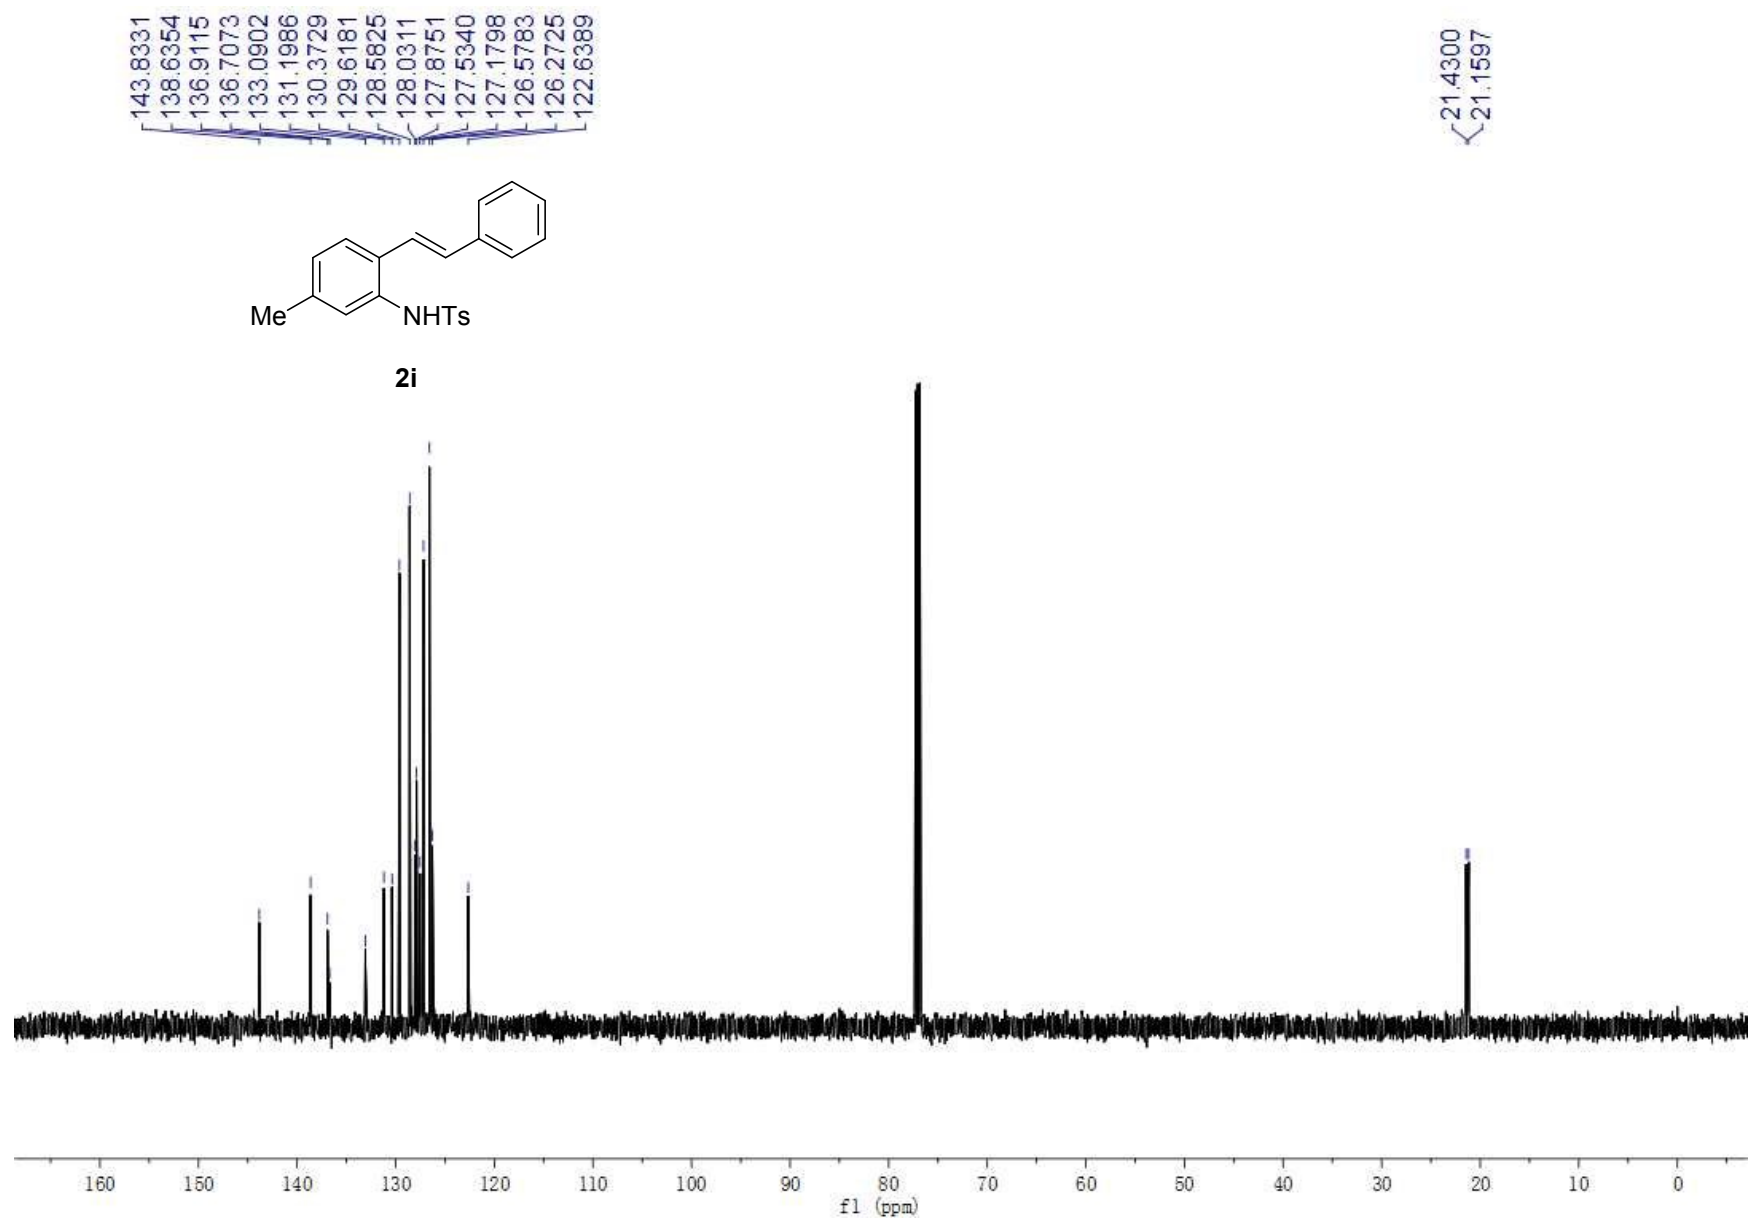

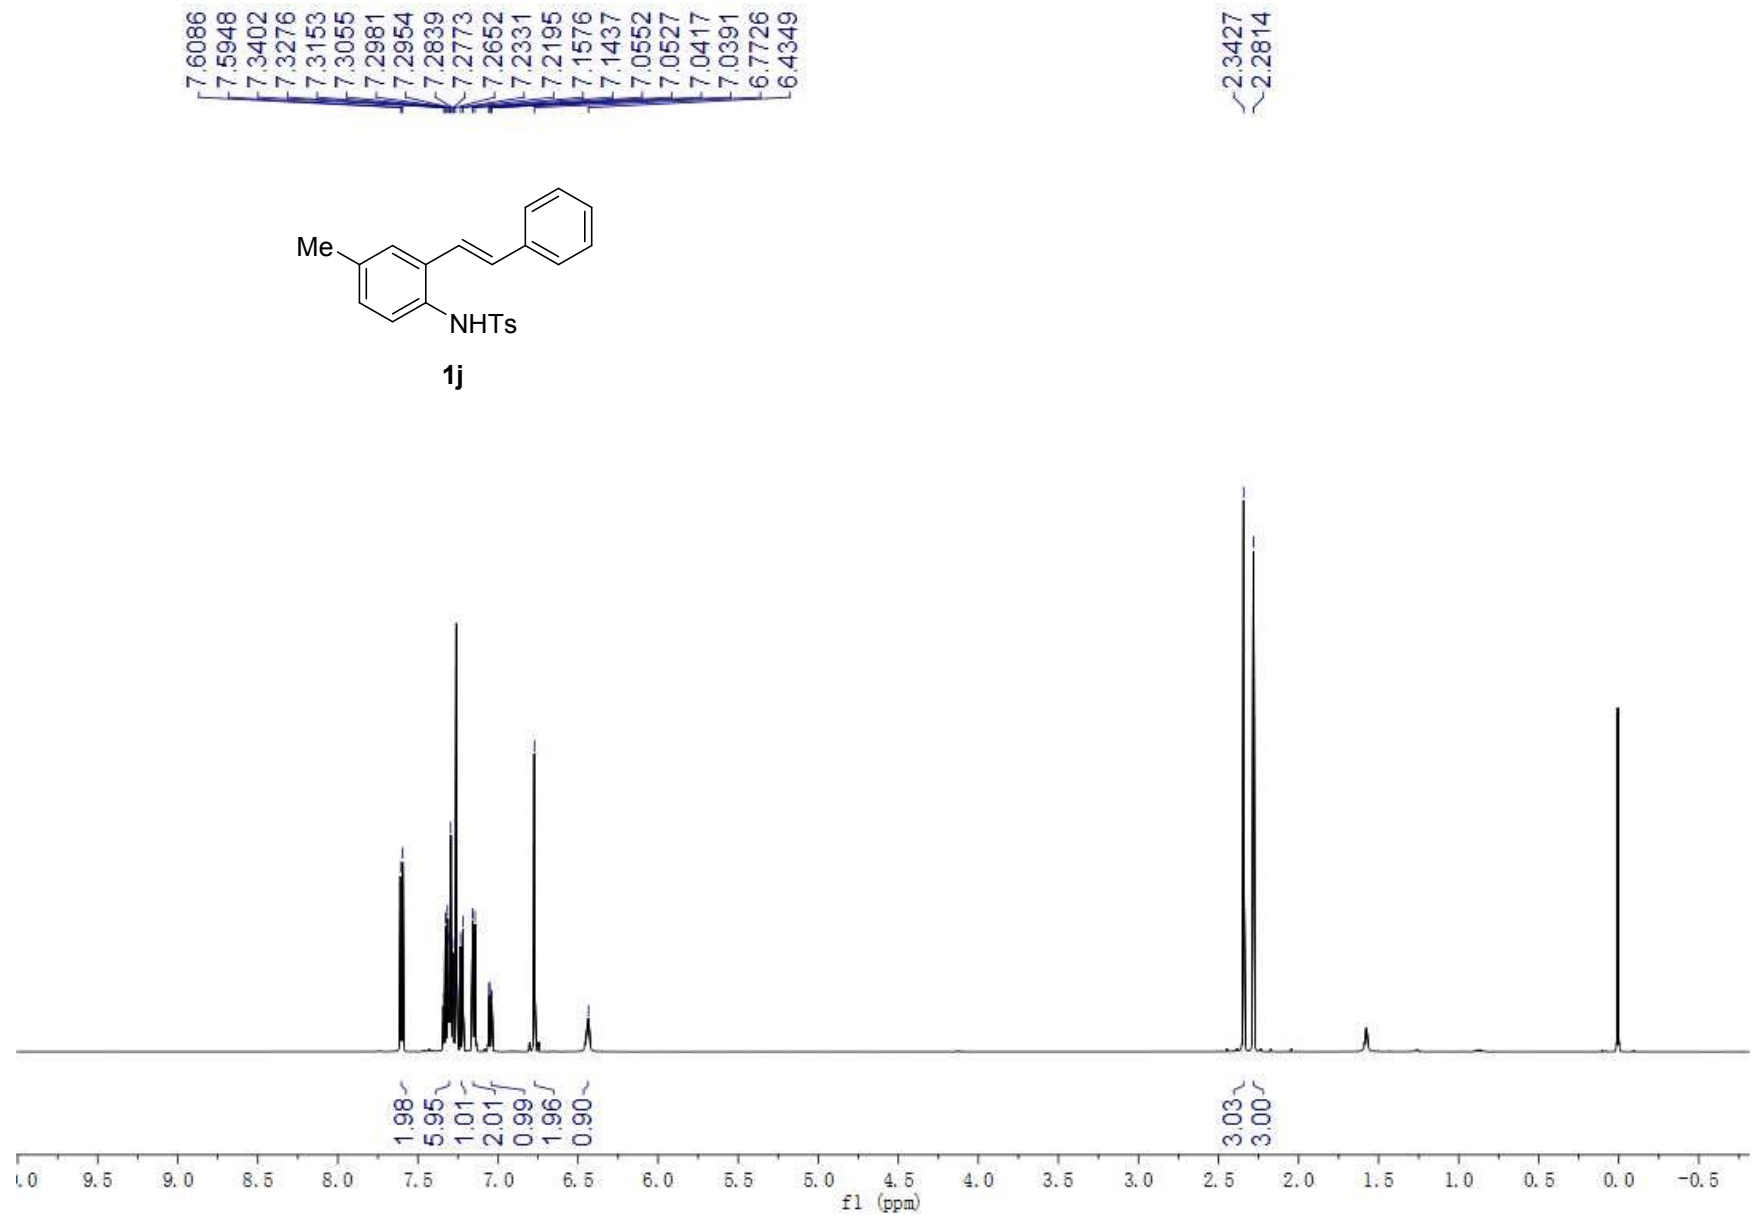

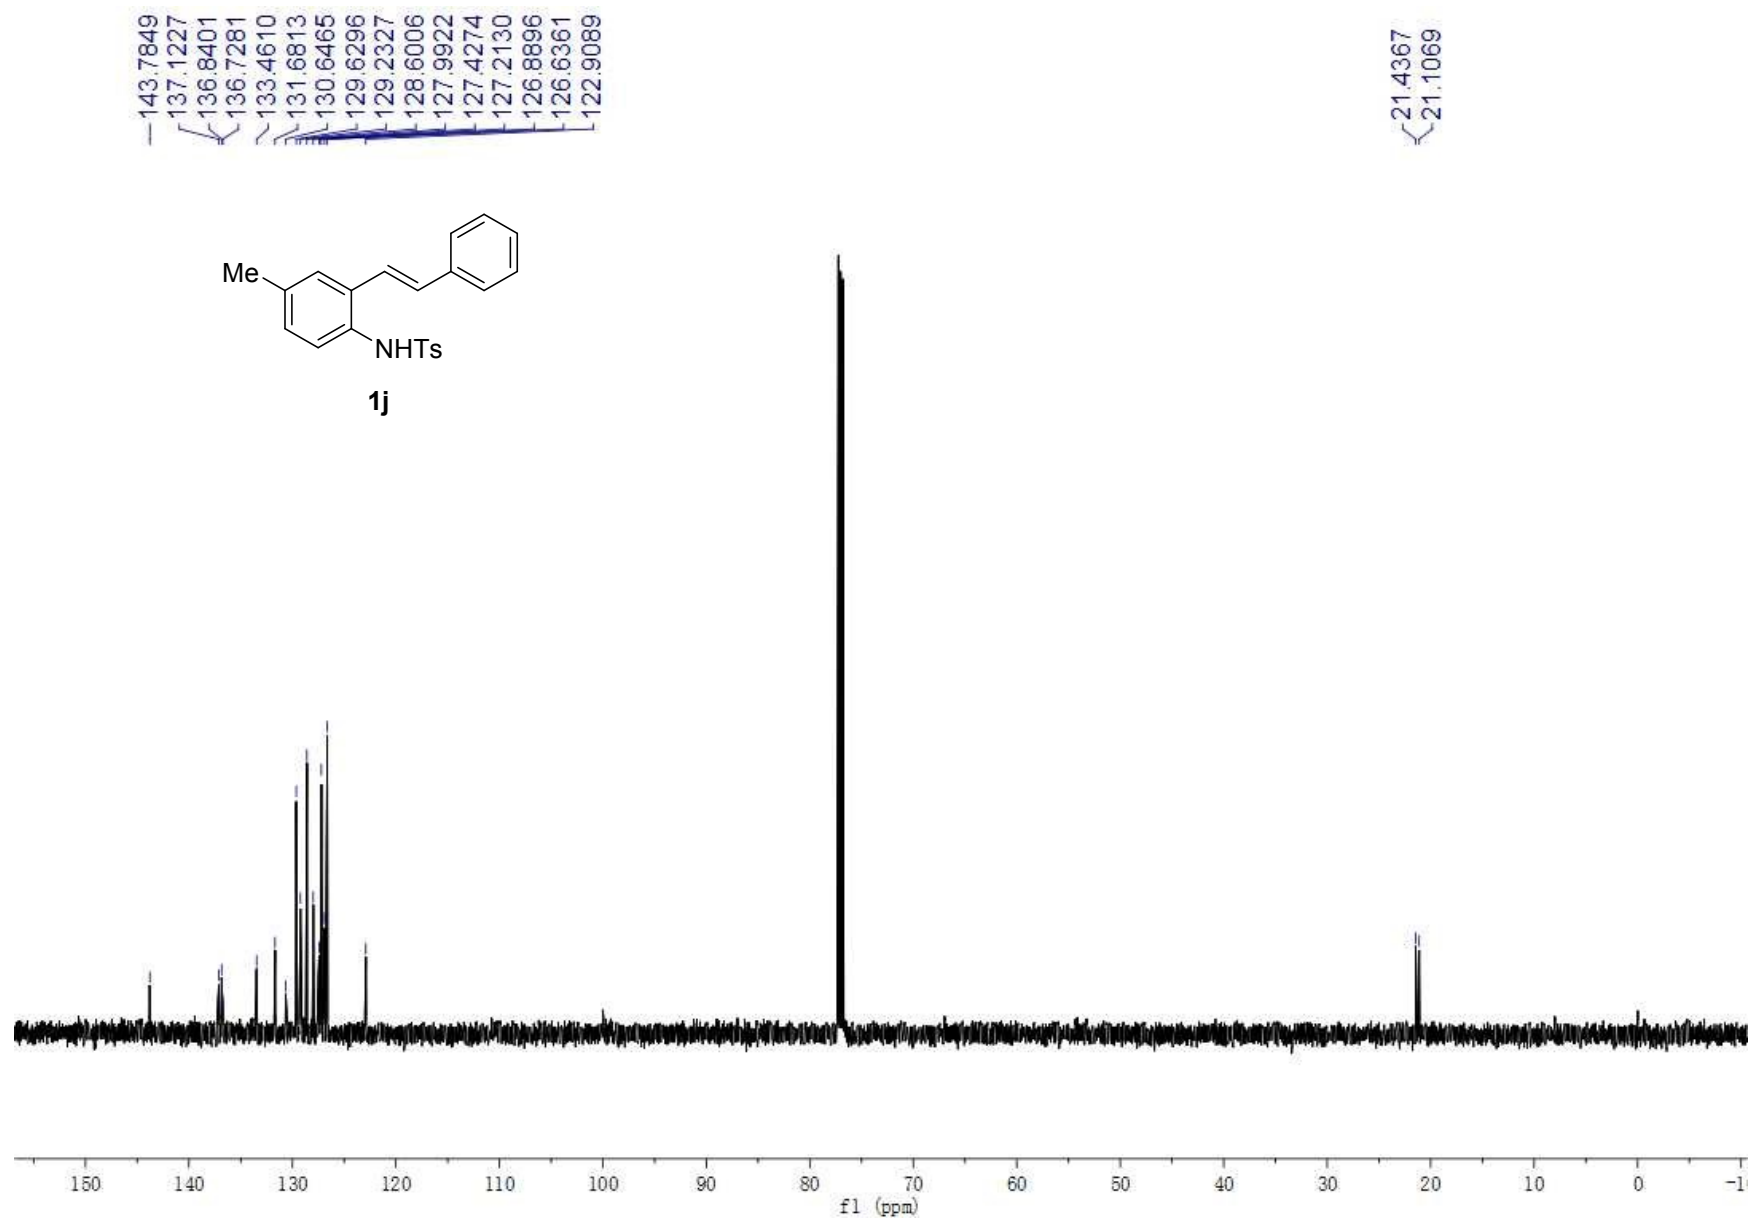

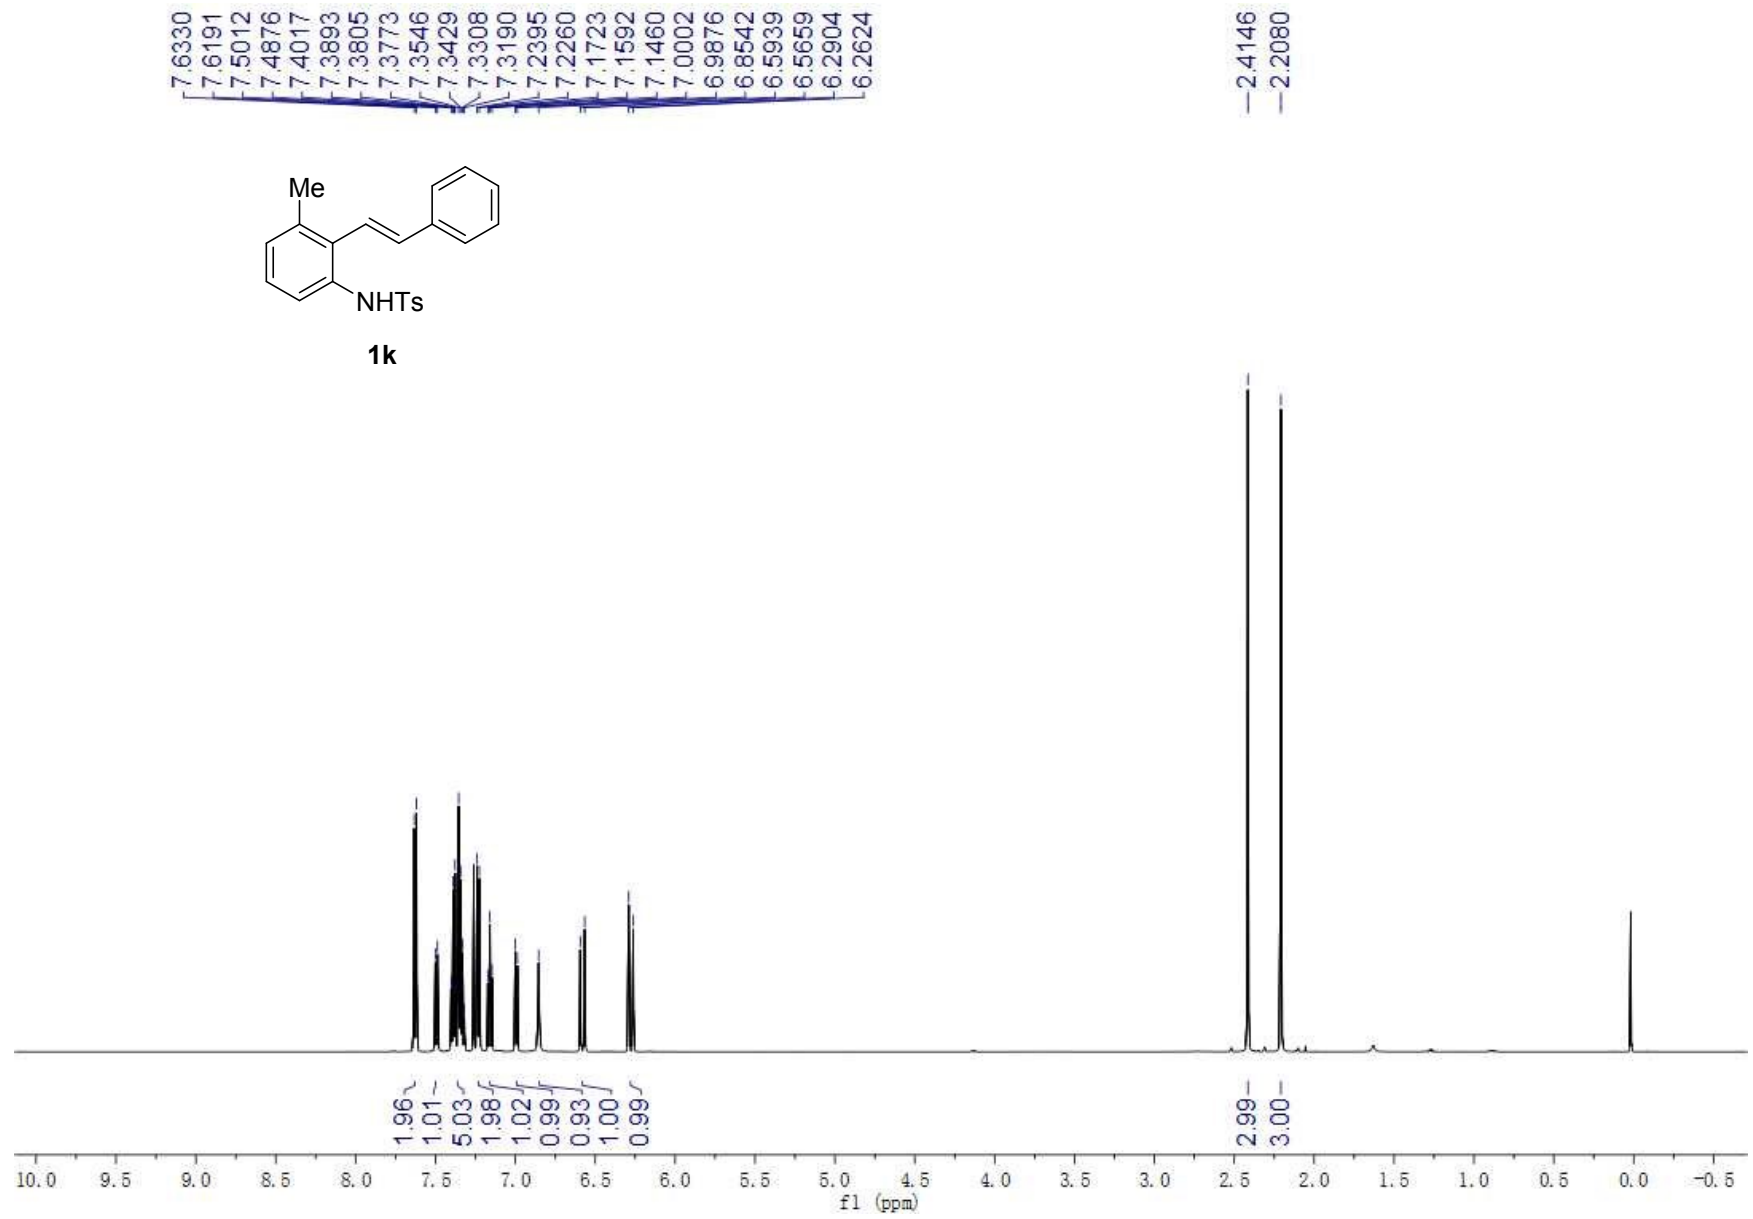

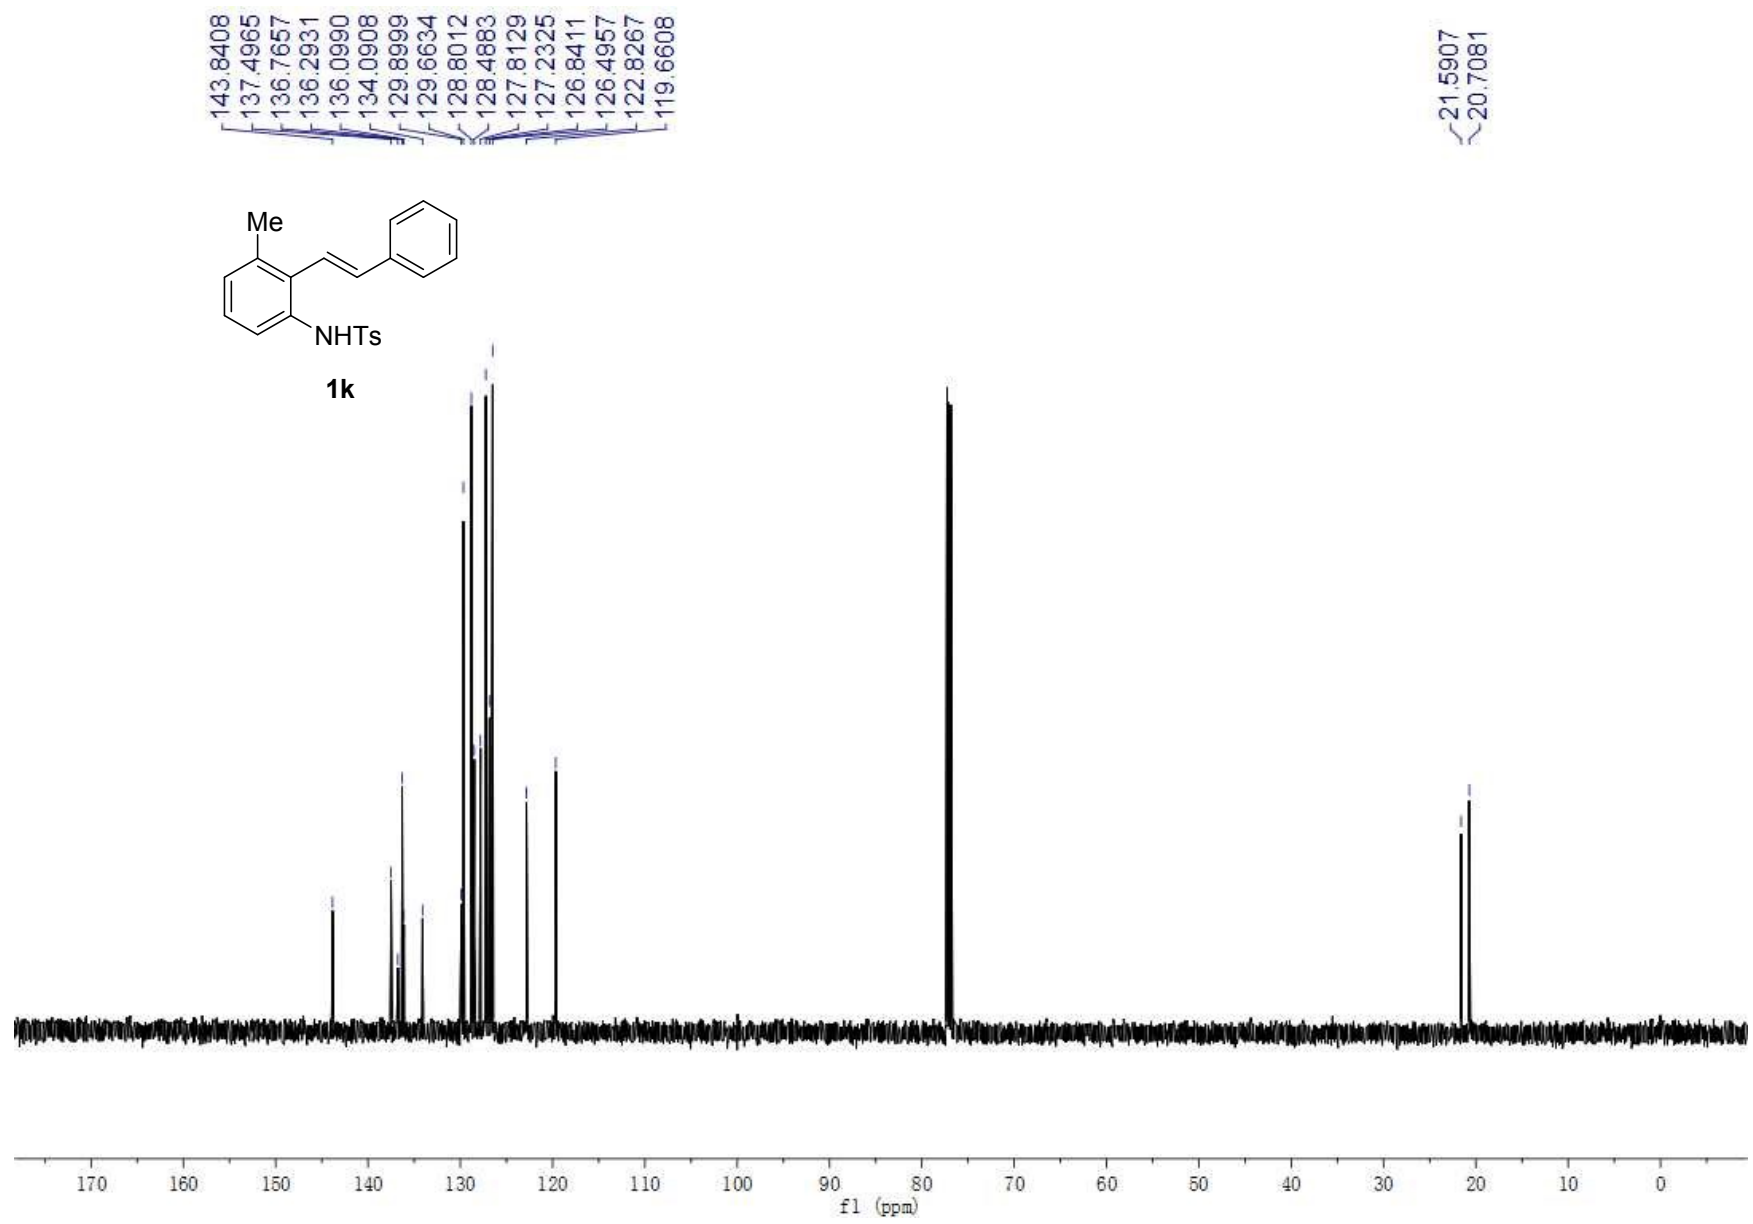

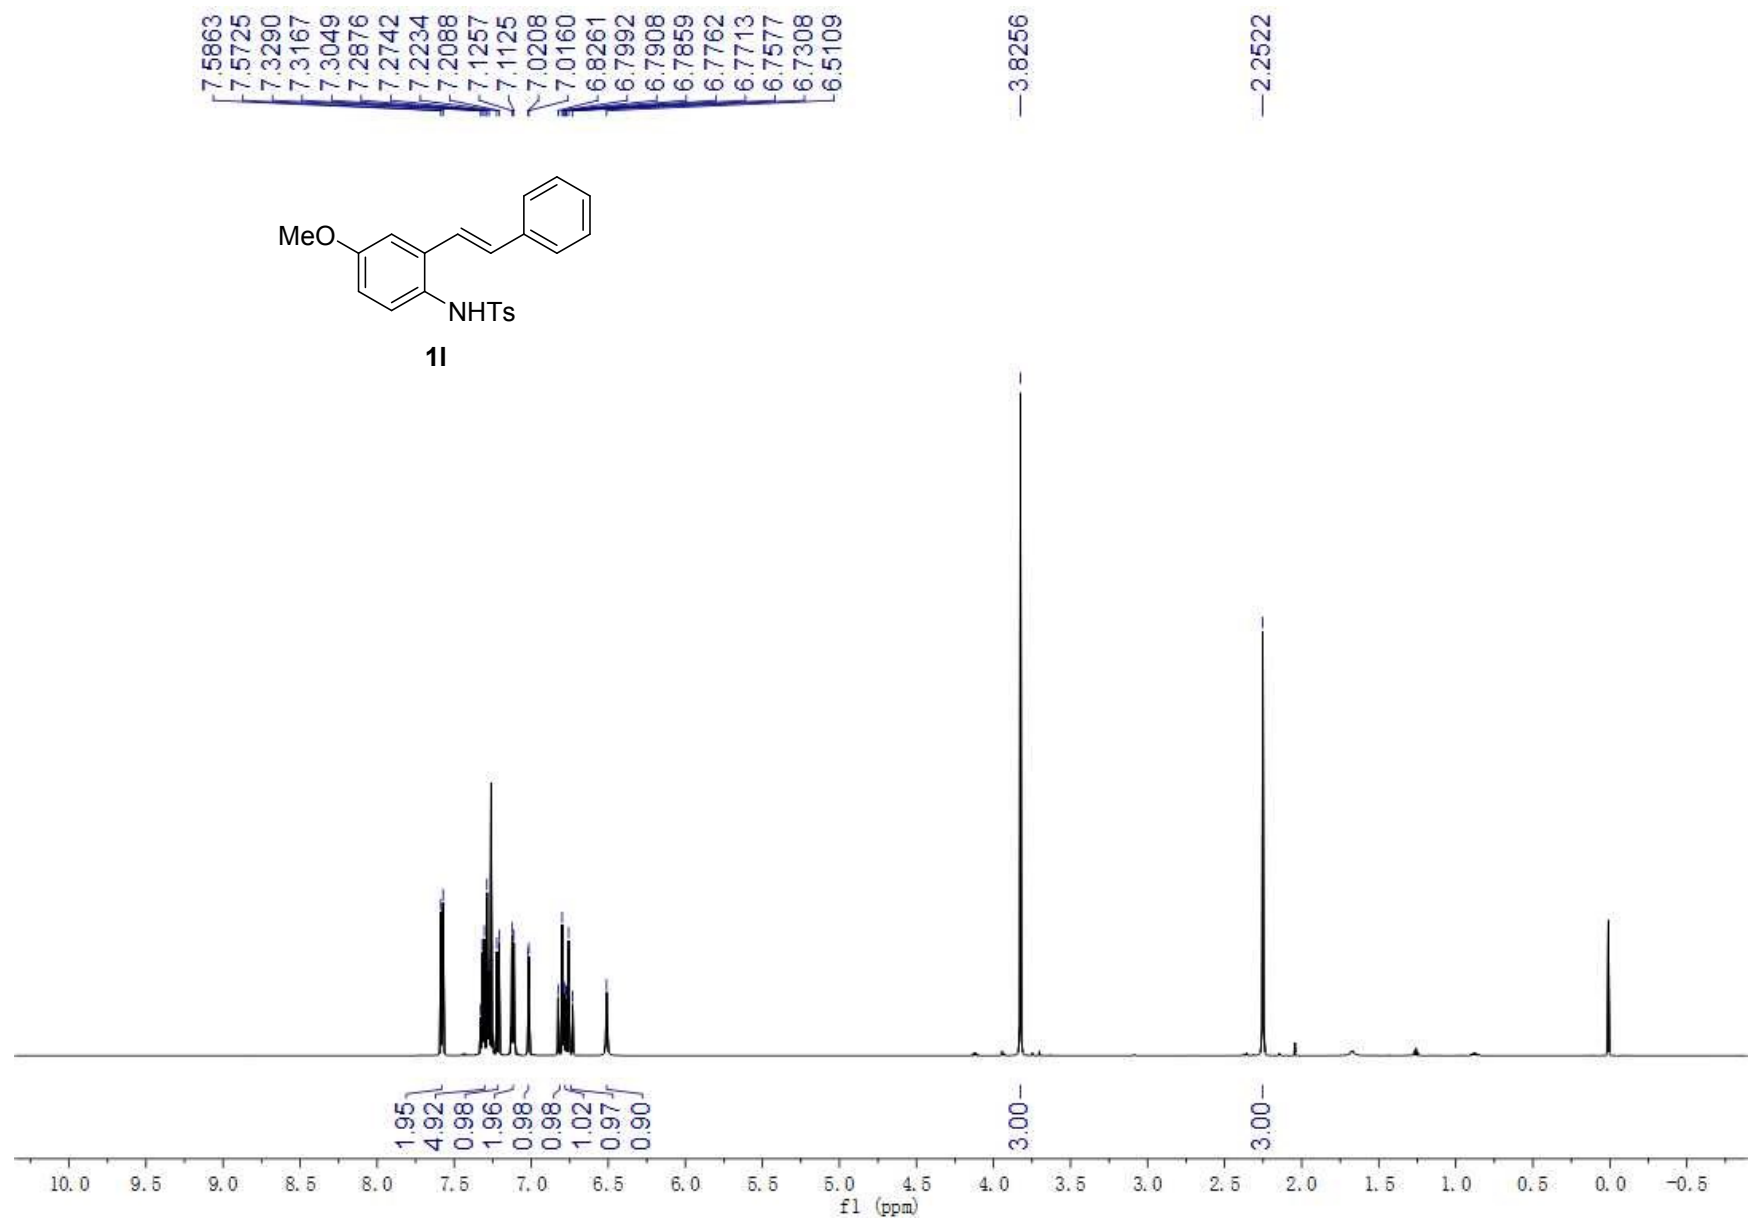

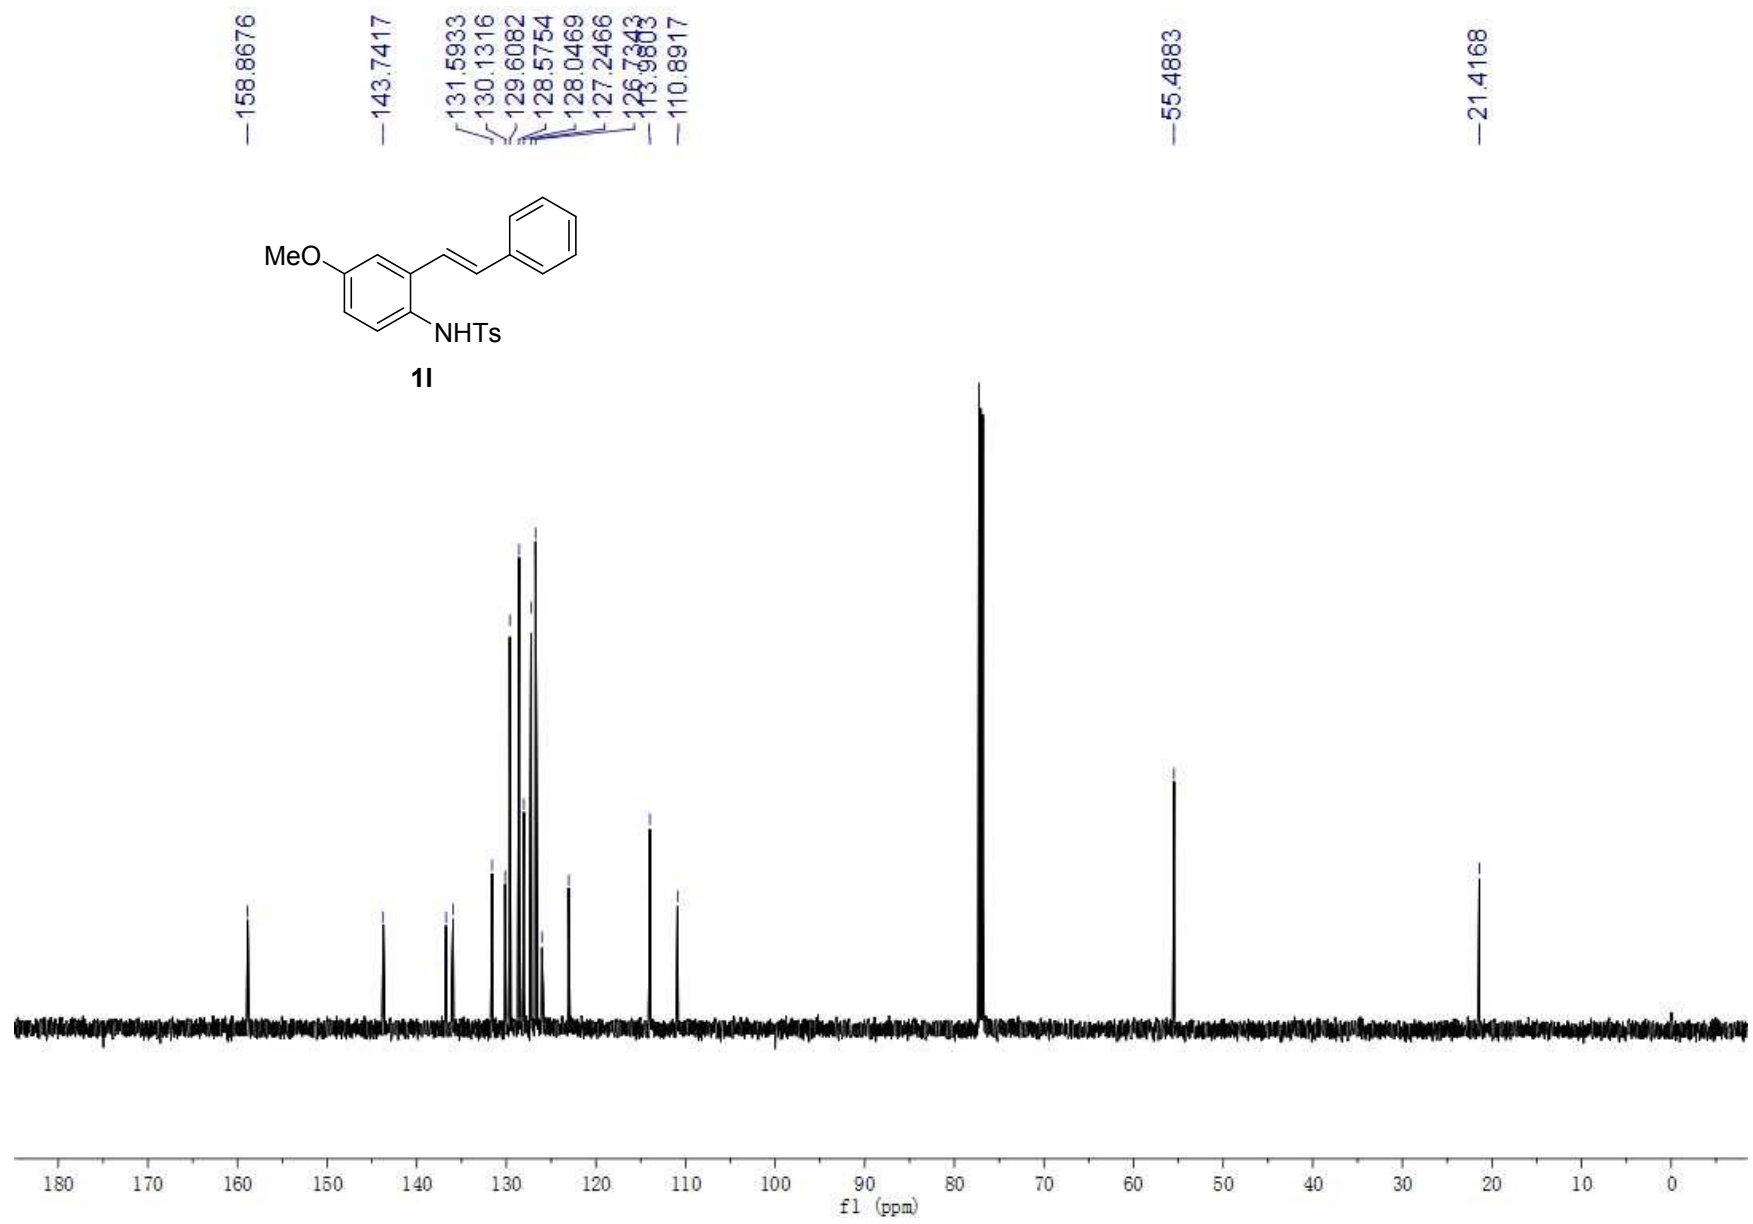

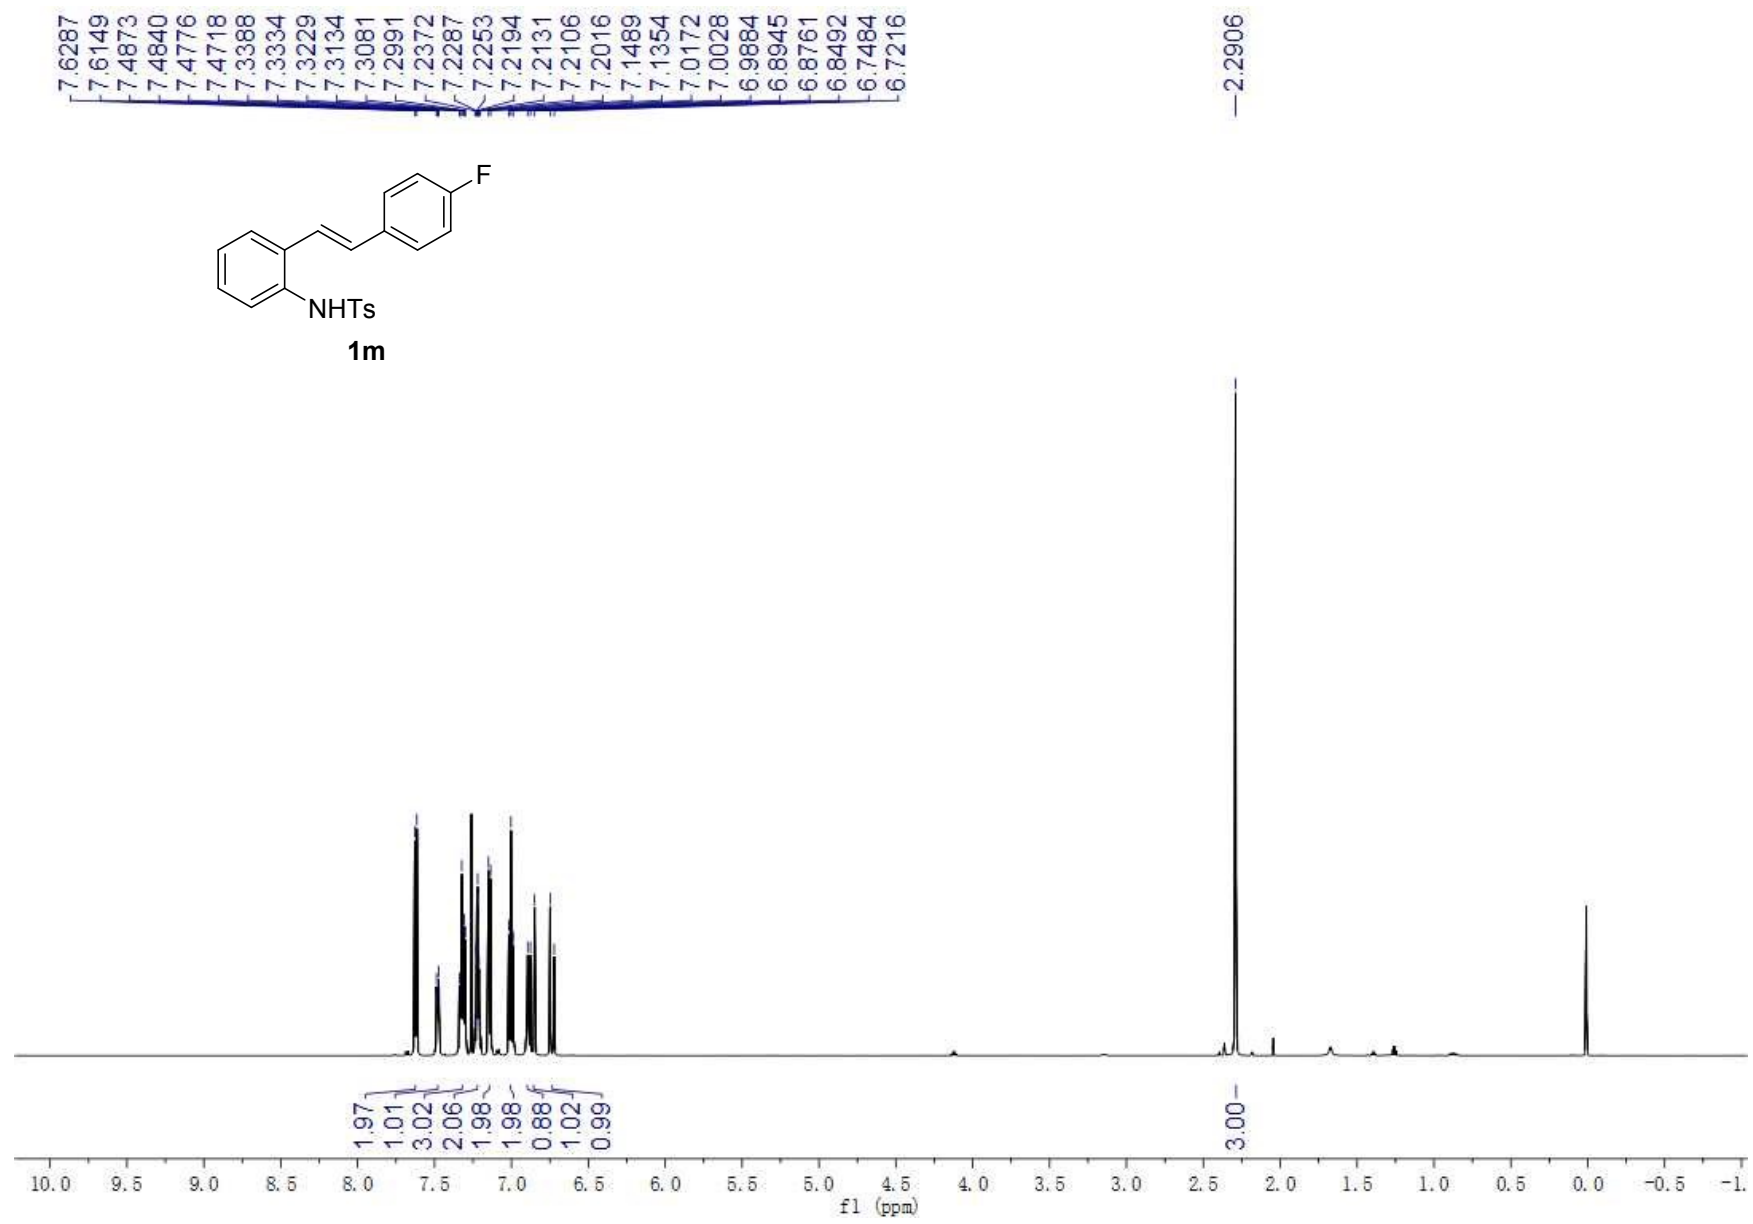



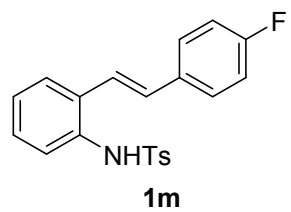

163.3767  
161.7348  
143.8905  
133.2635  
133.0429  
130.7334  
129.6363  
128.3939  
128.2988  
128.2458  
127.2269  
127.0984  
126.7824  
126.4336  
122.6720  
115.6283  
99.9919

-21.4436

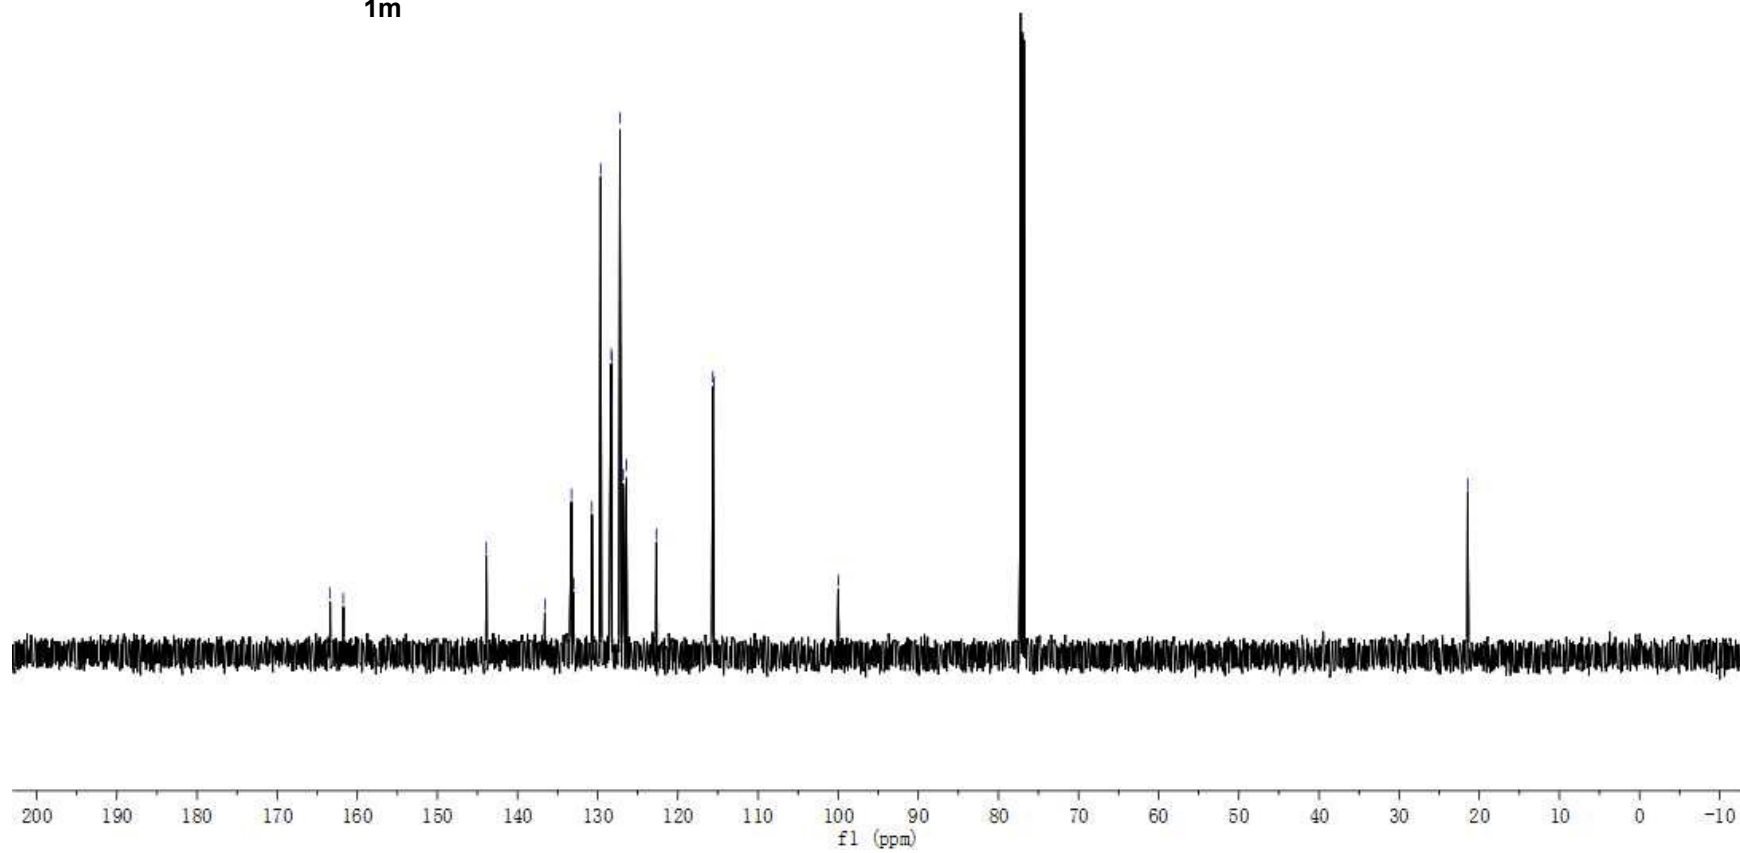

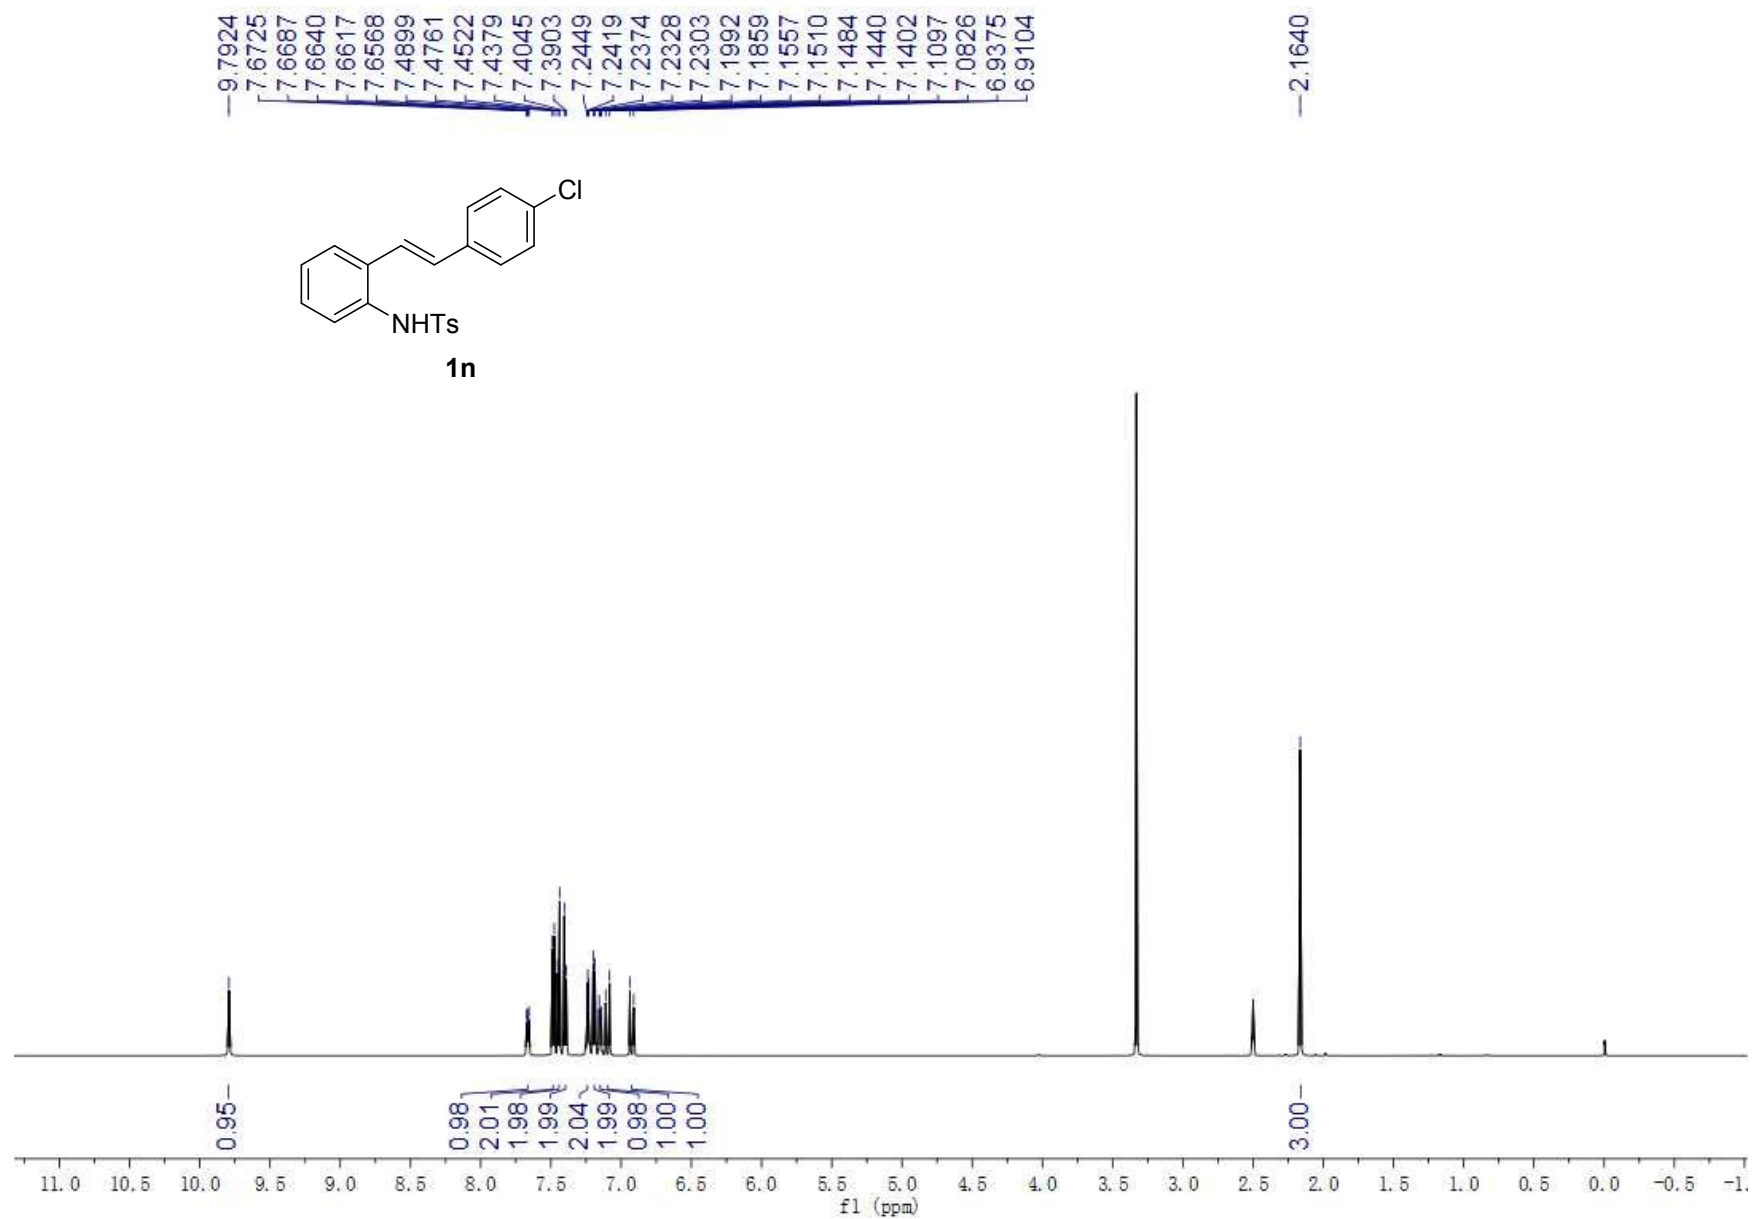

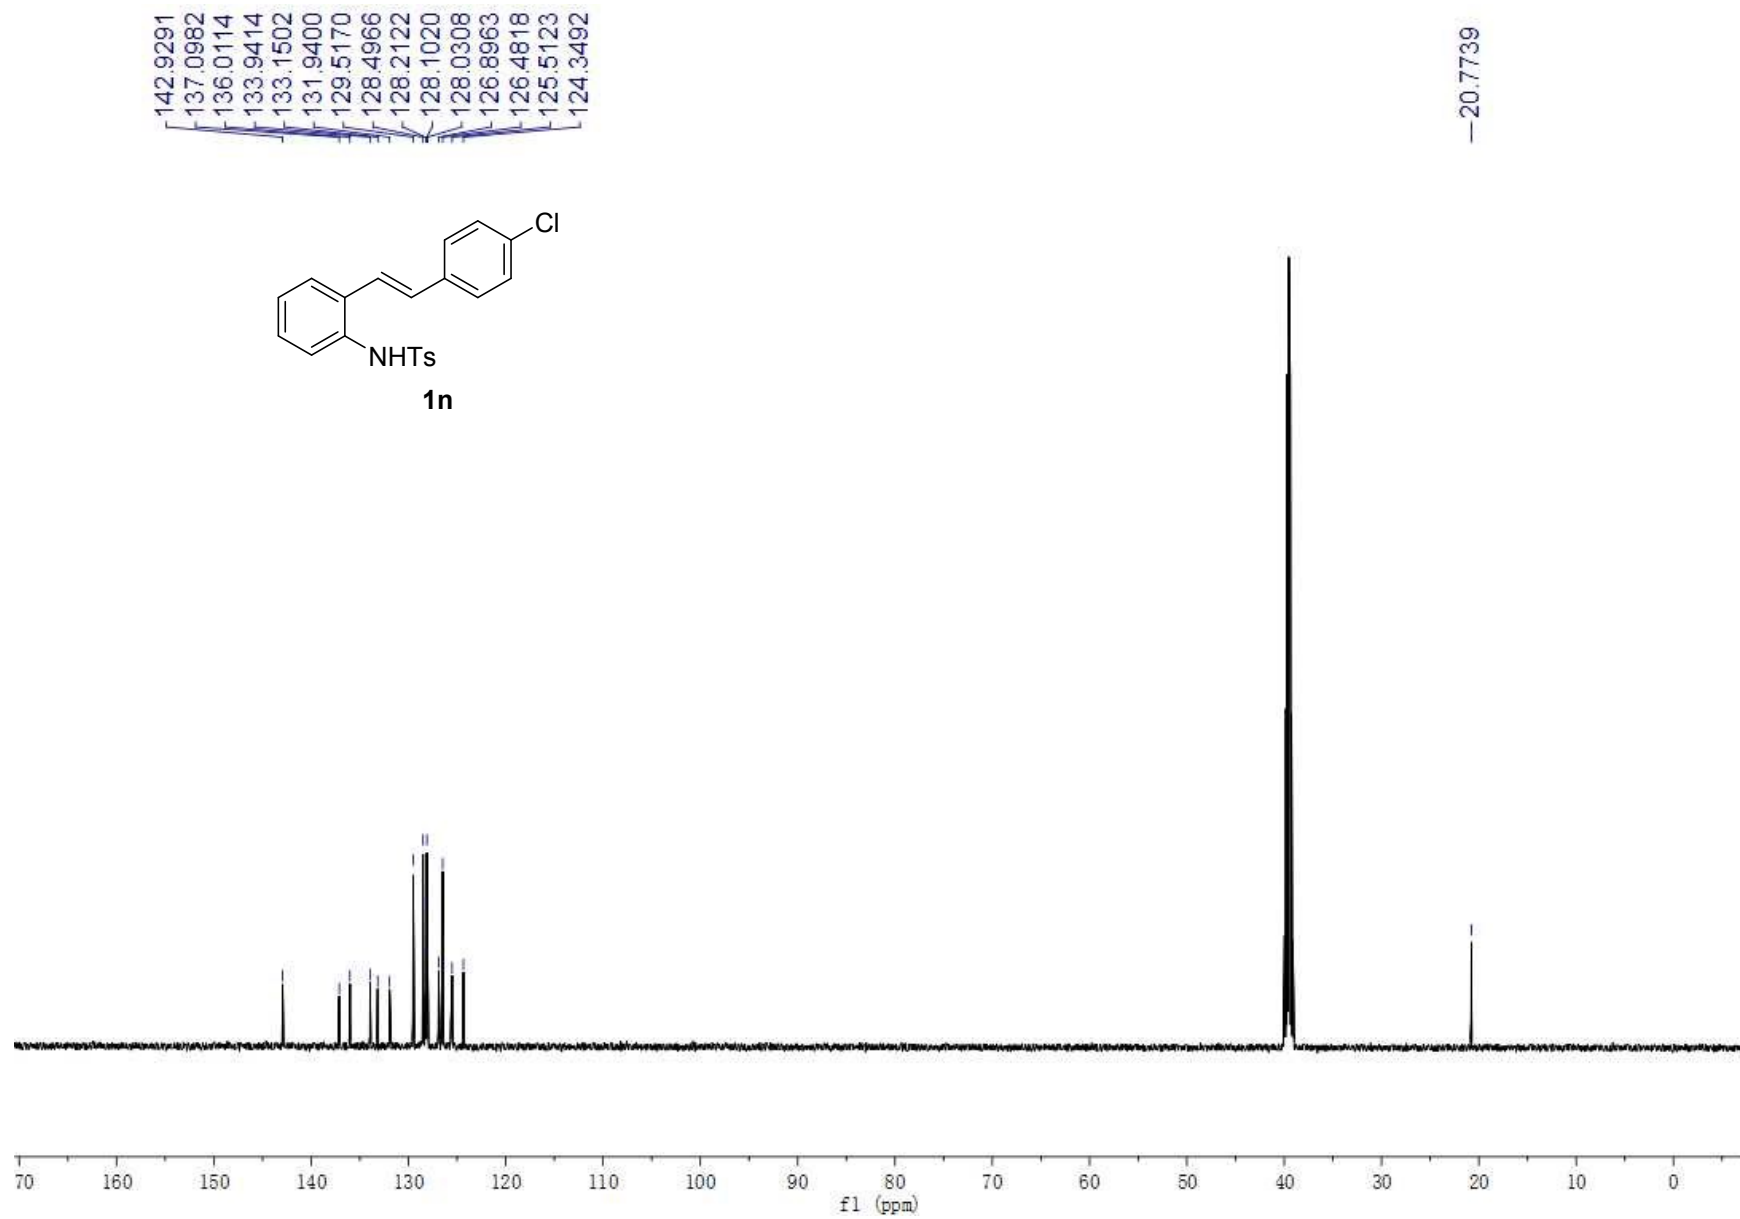

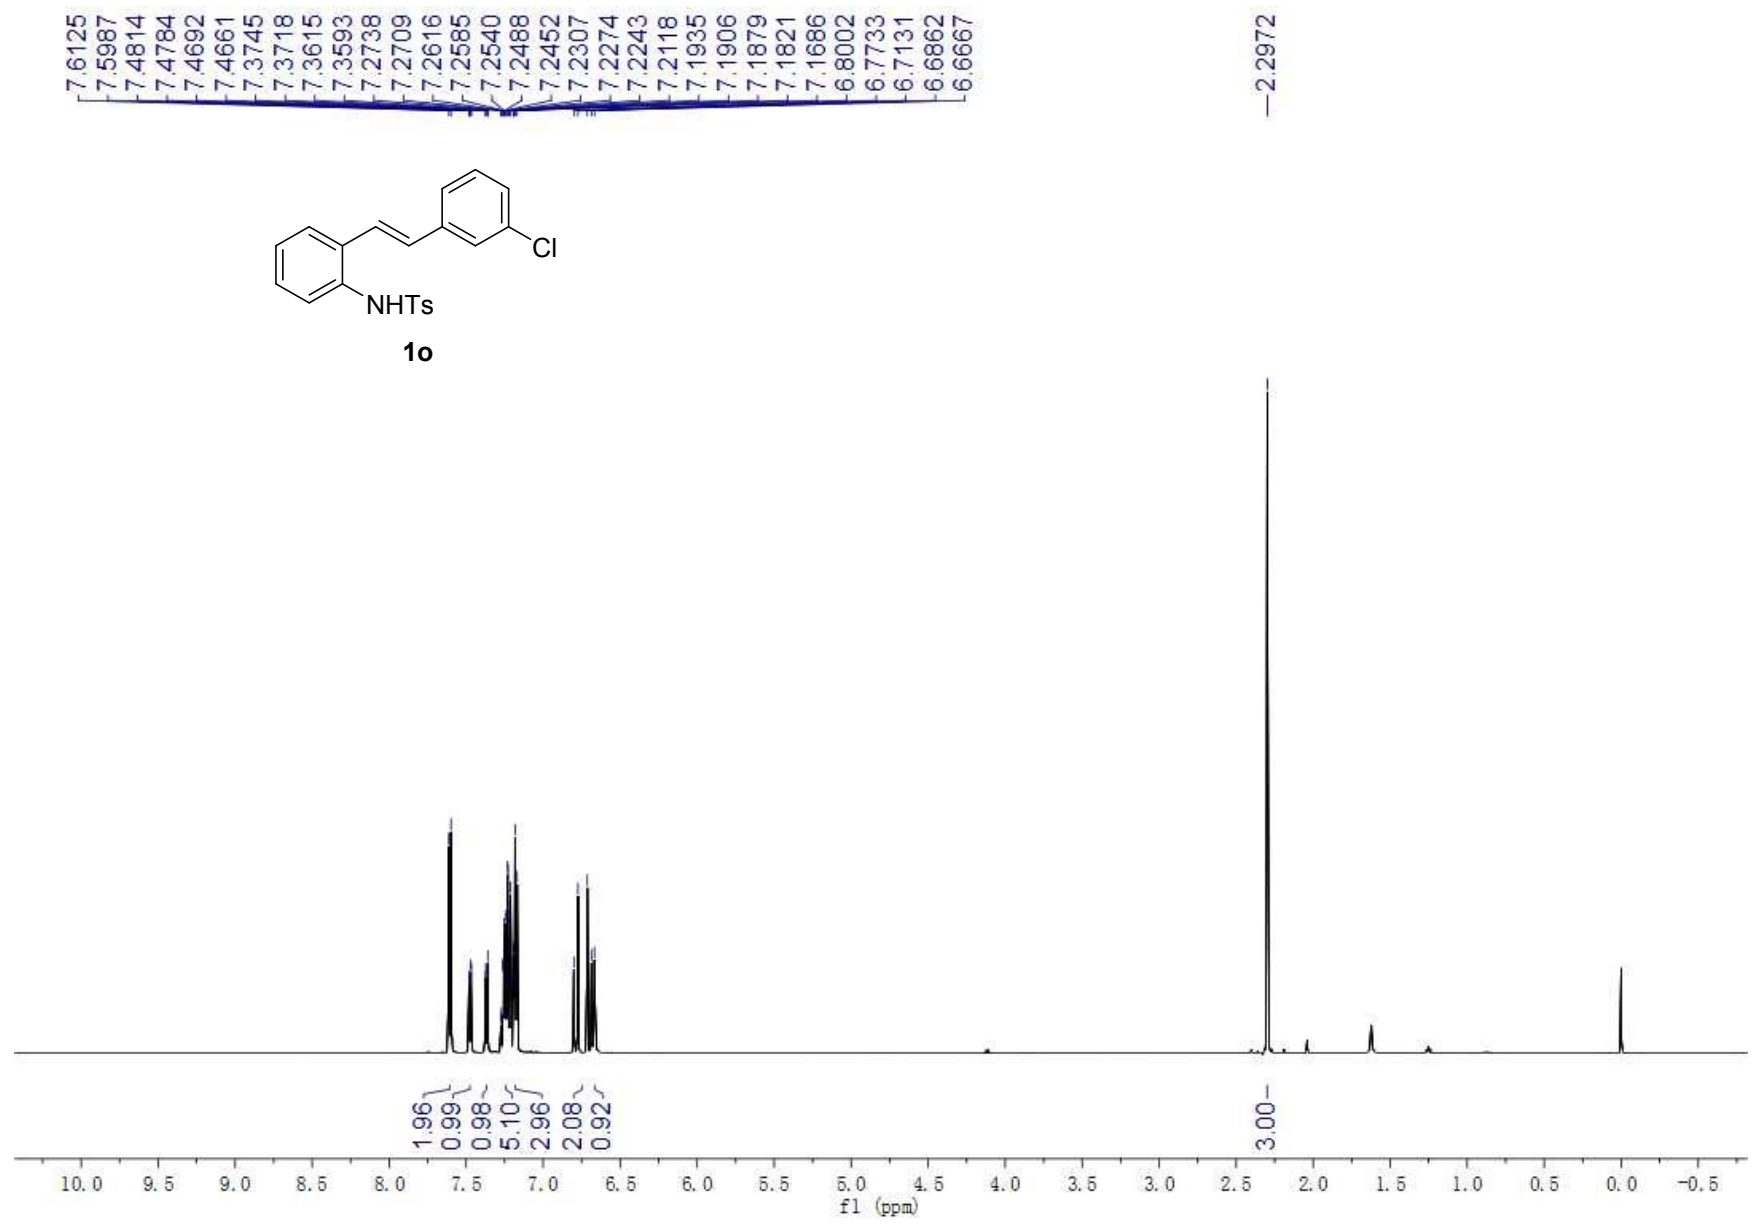

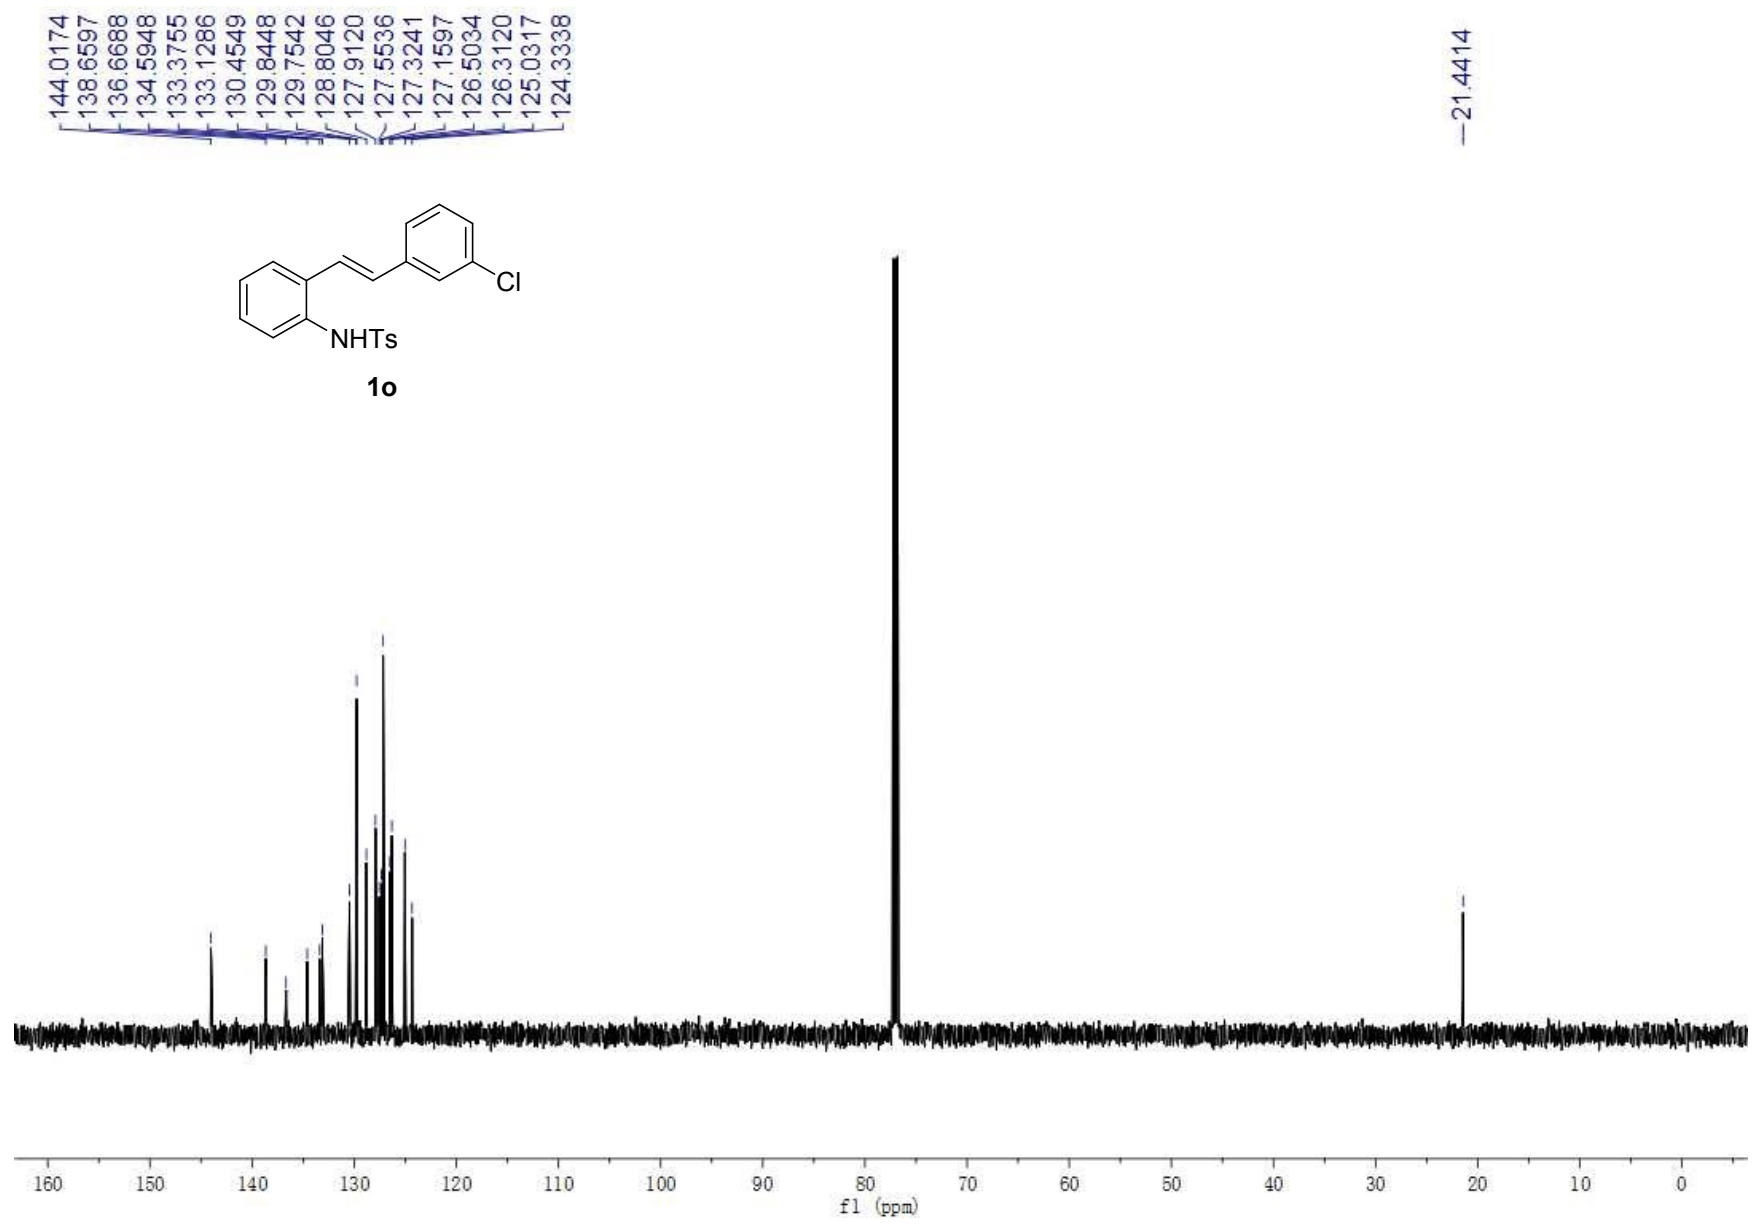

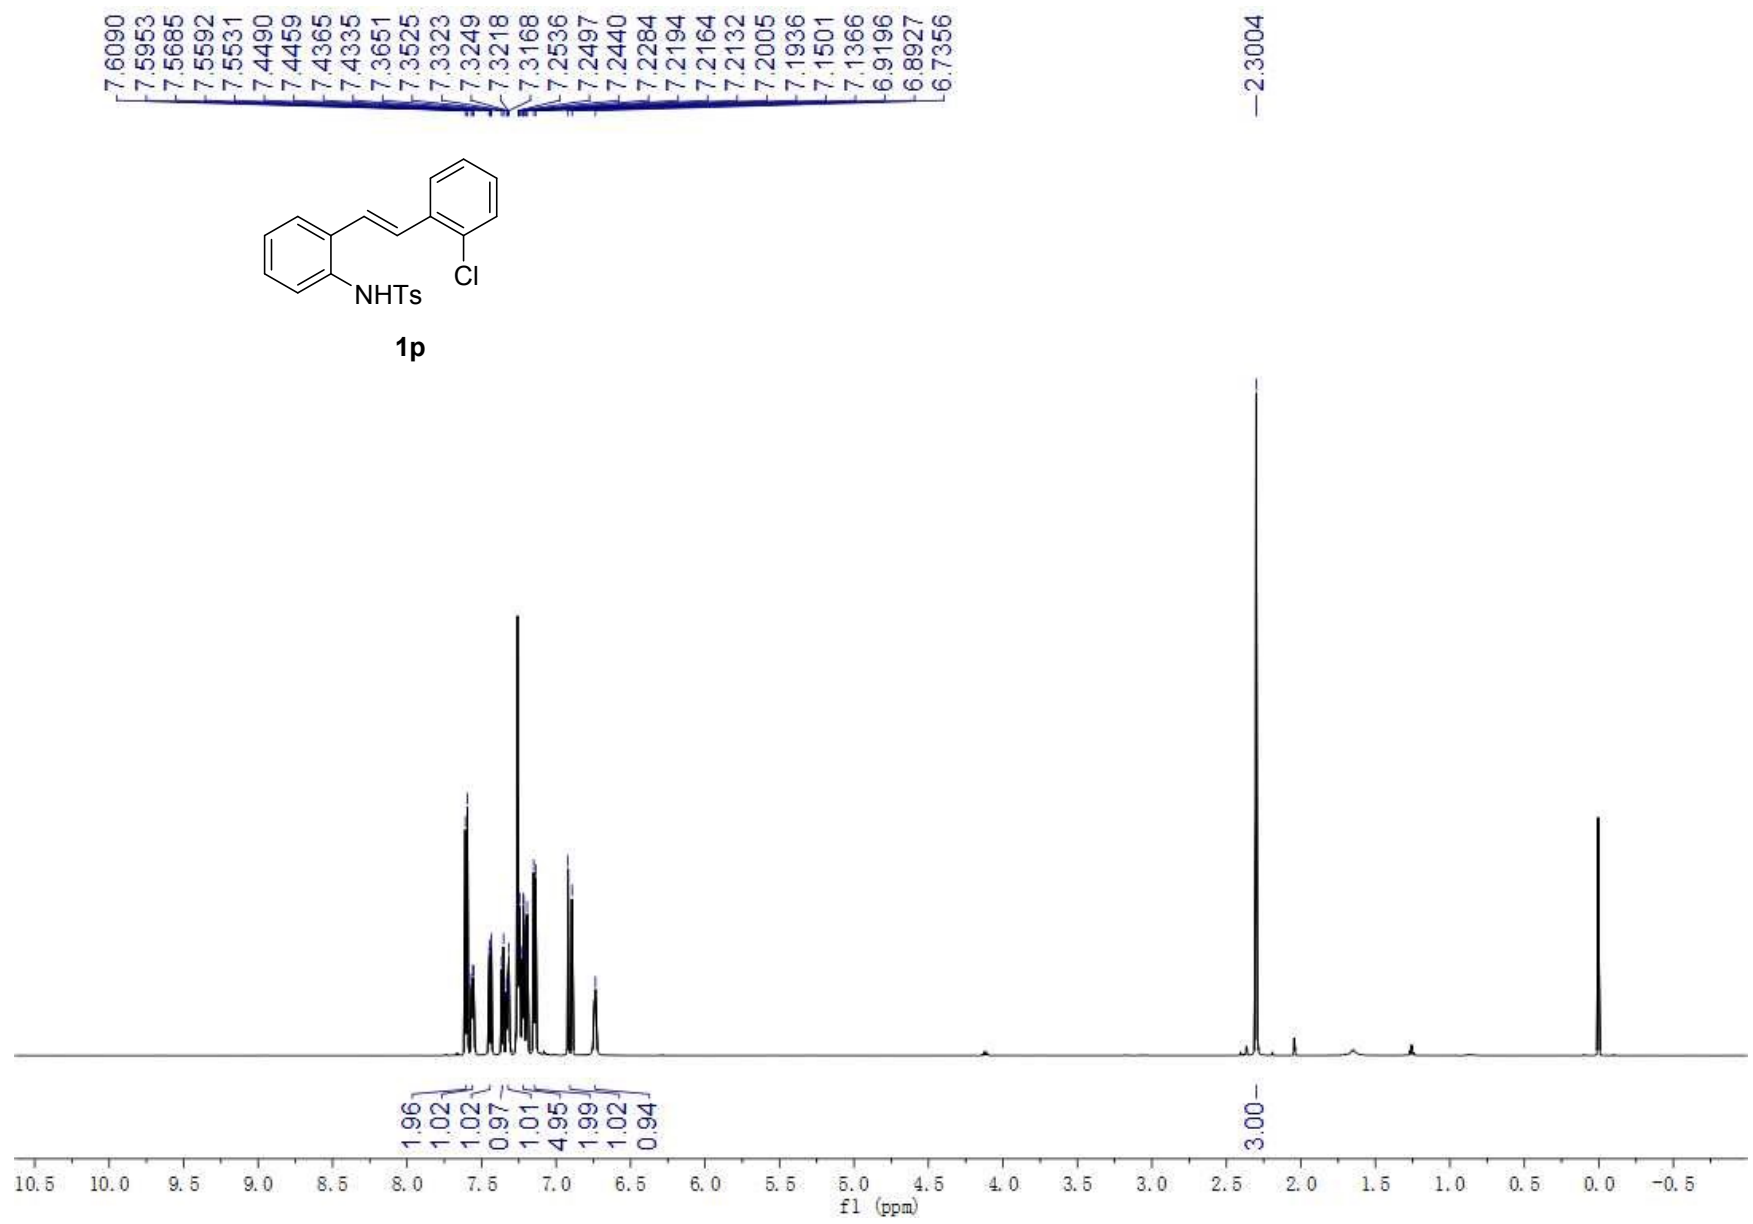

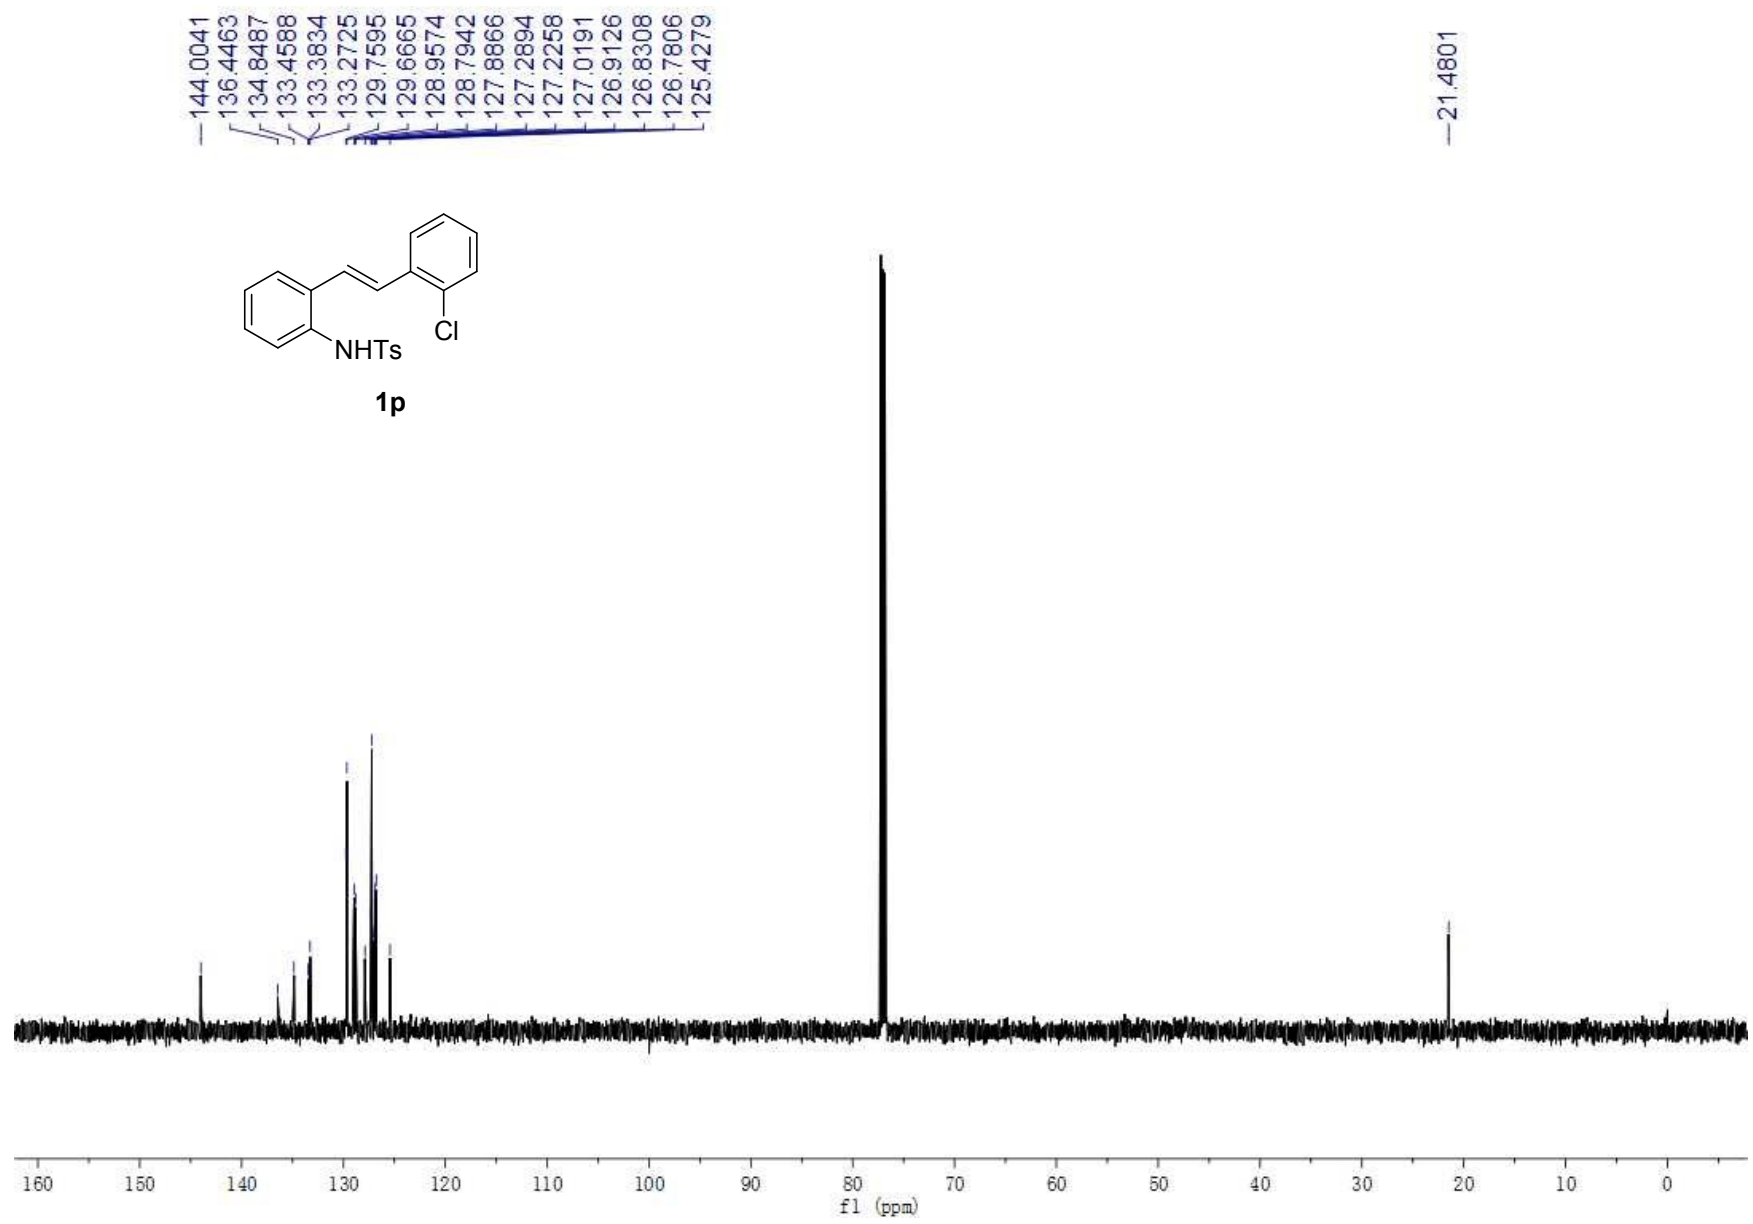

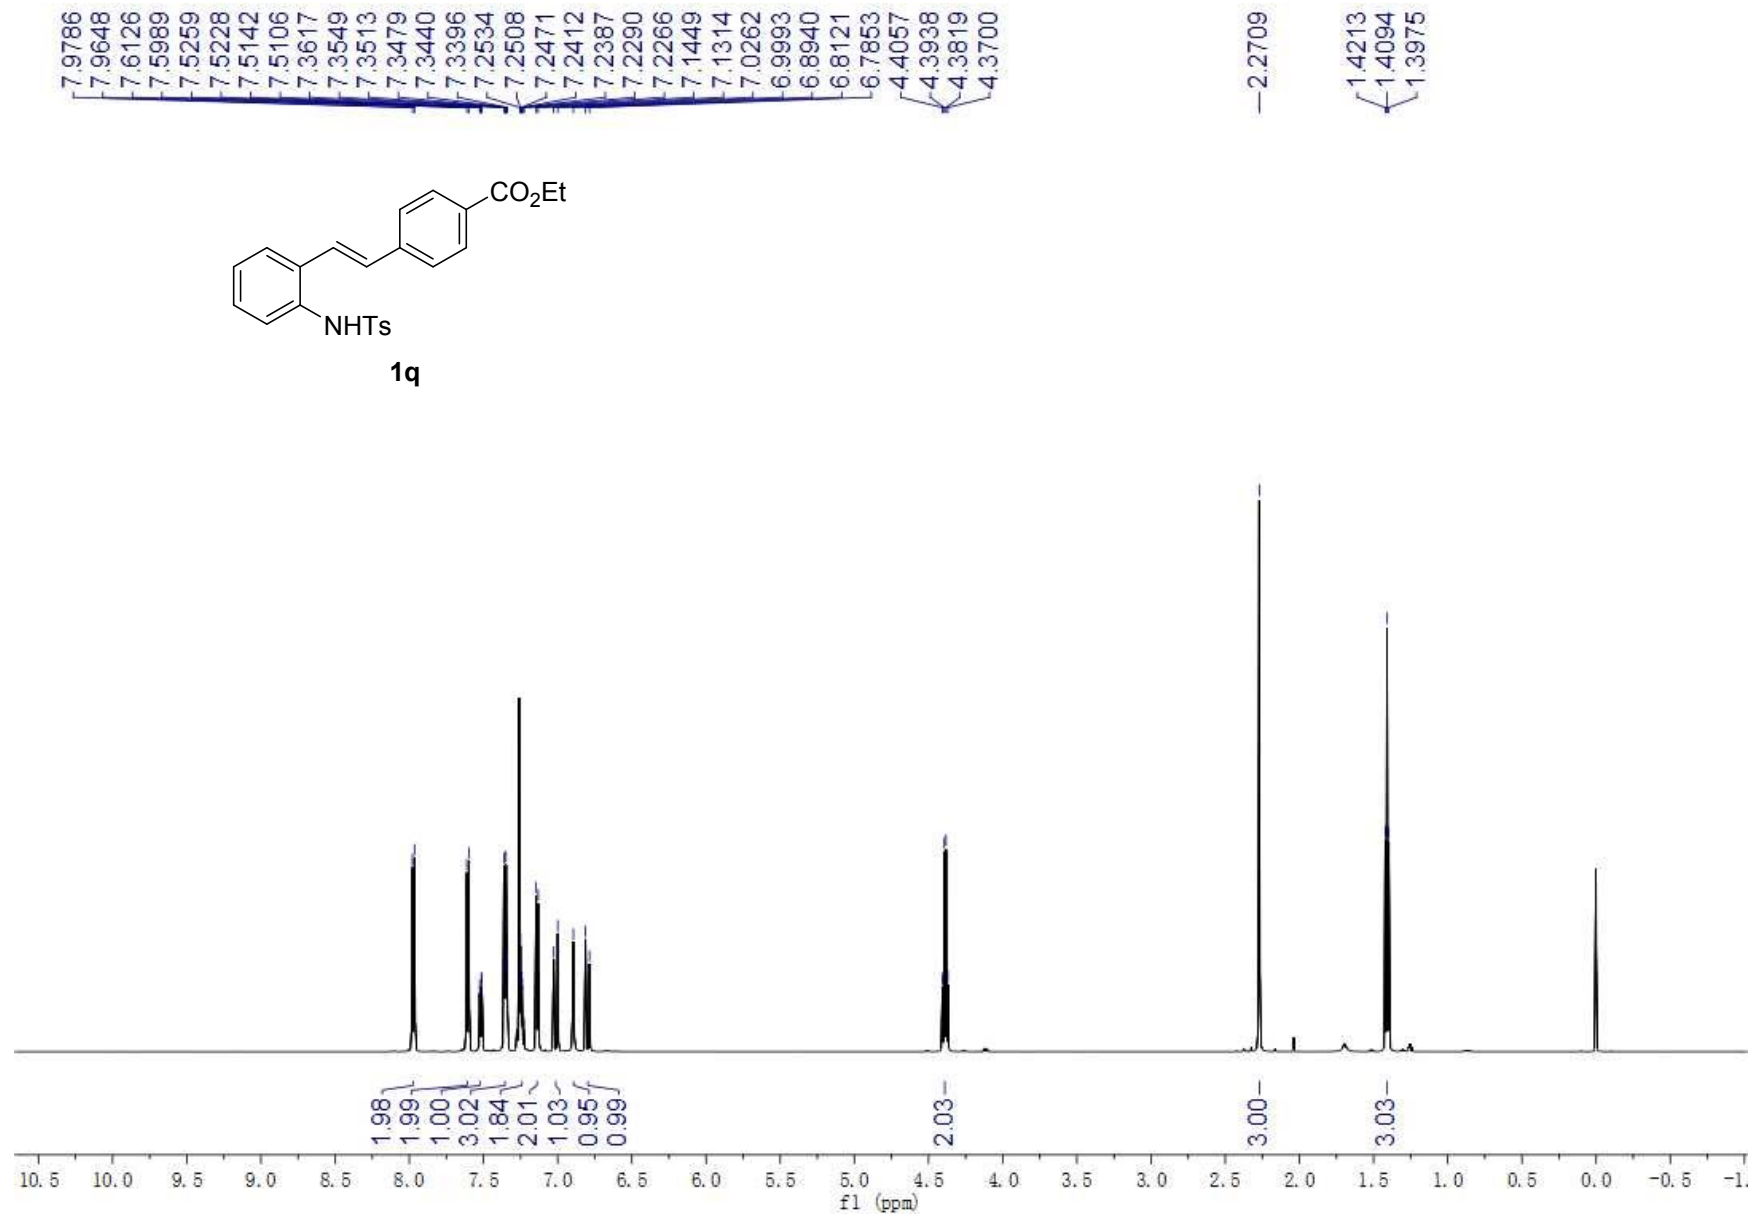



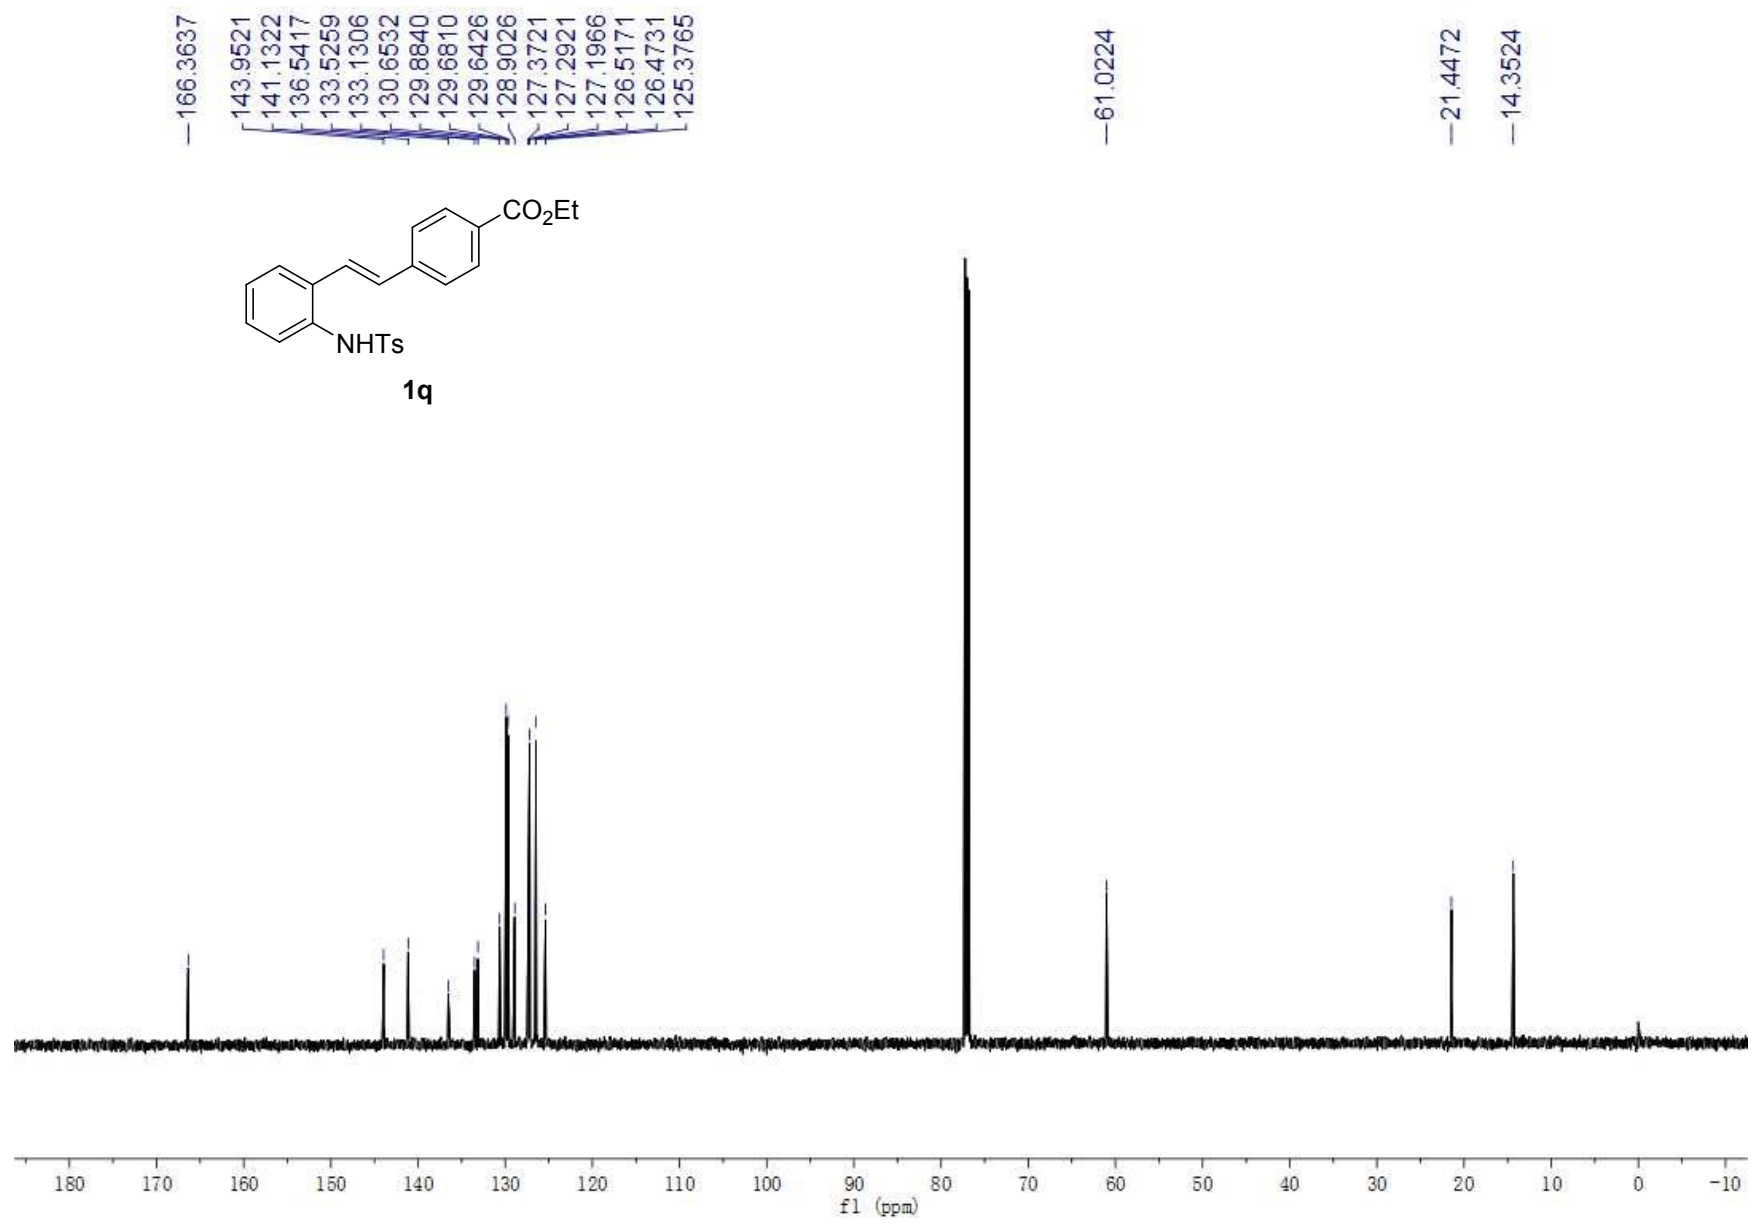

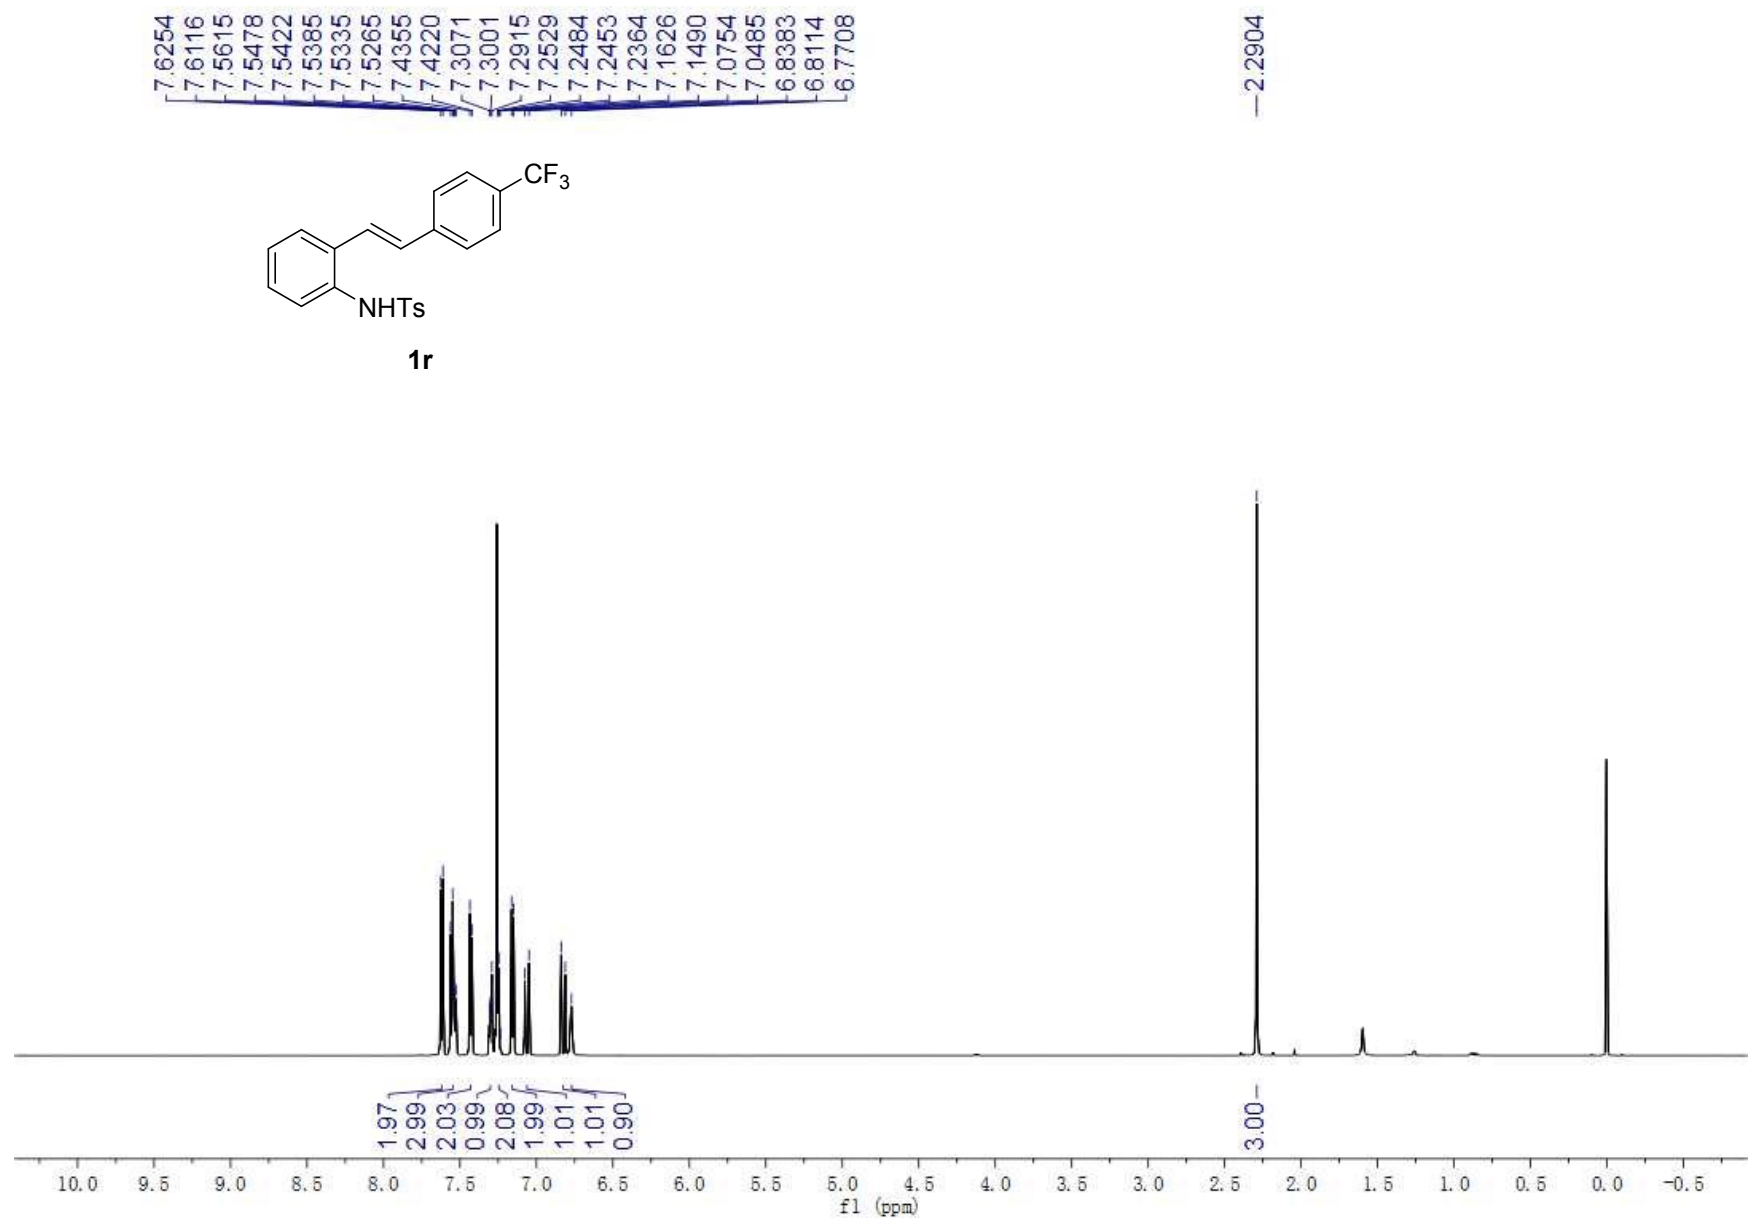

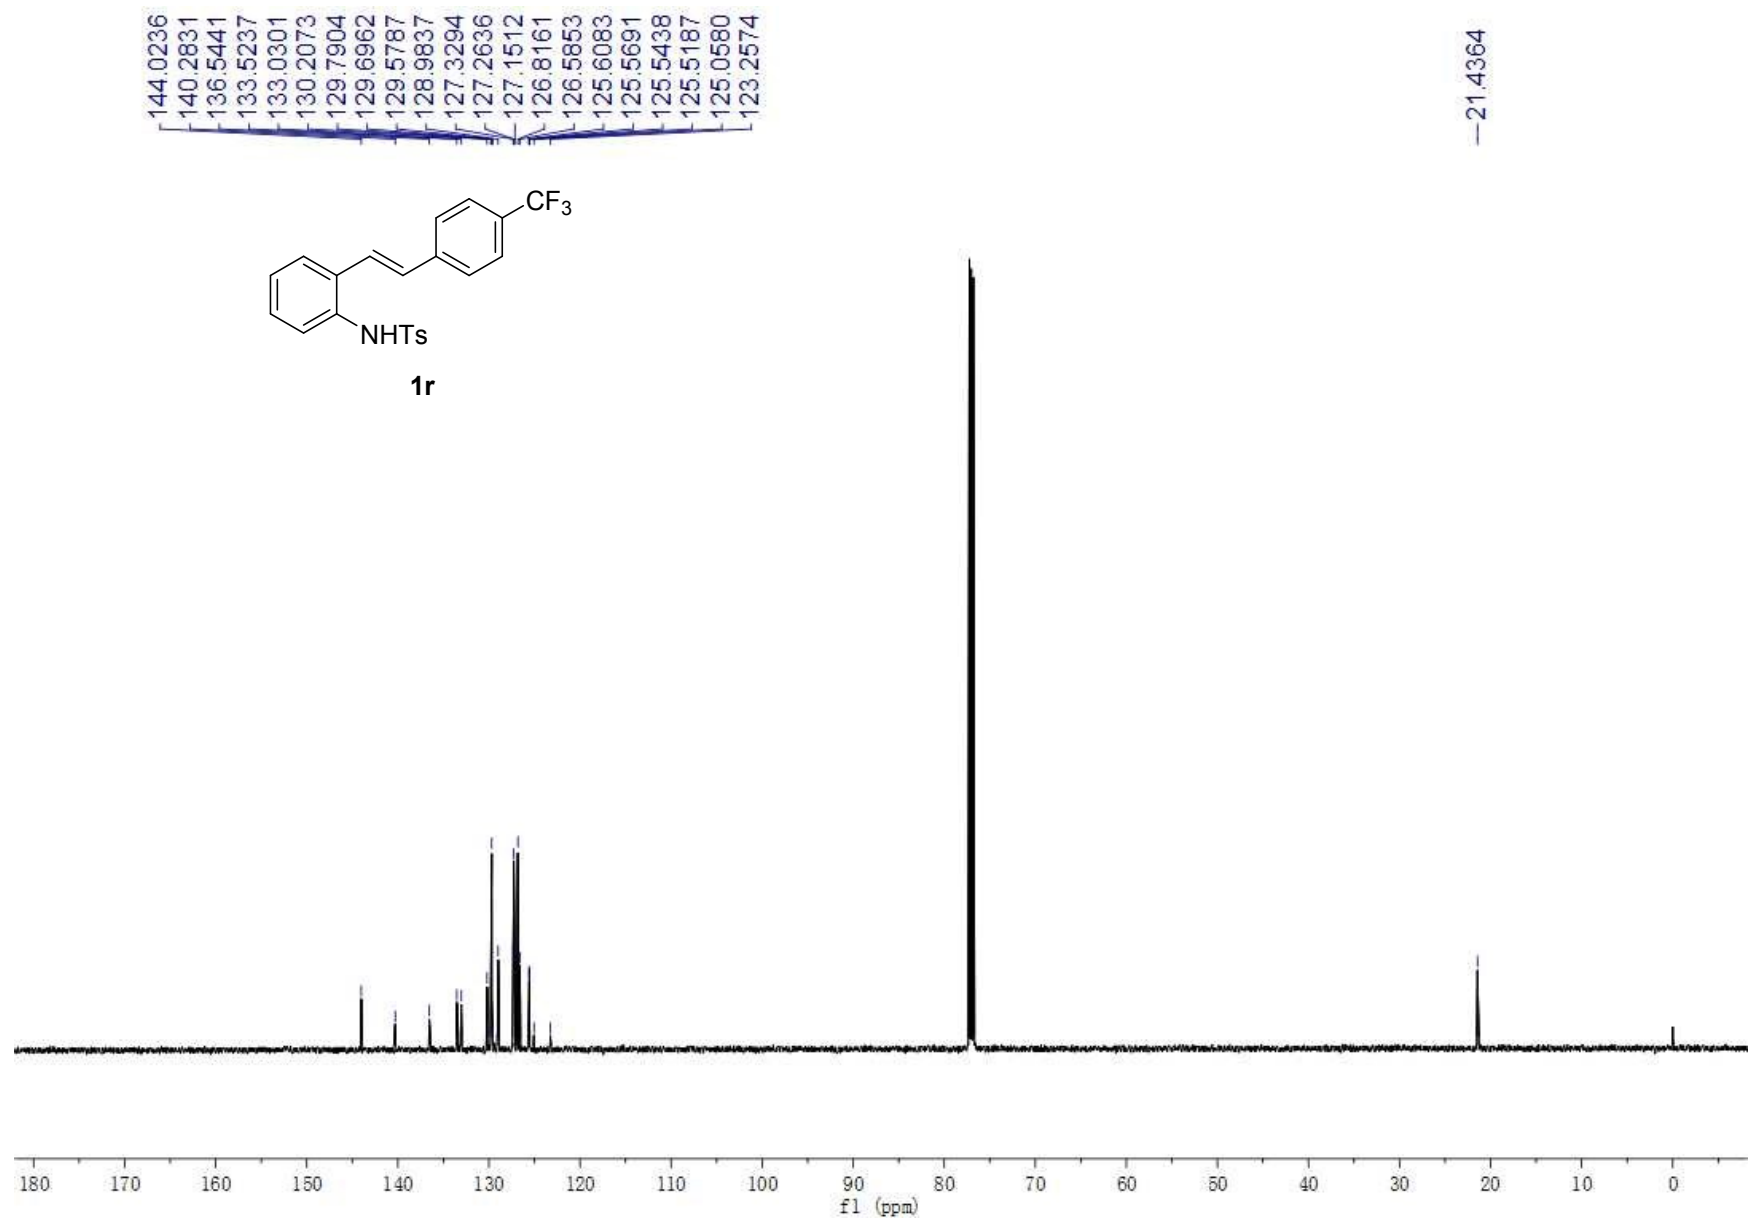

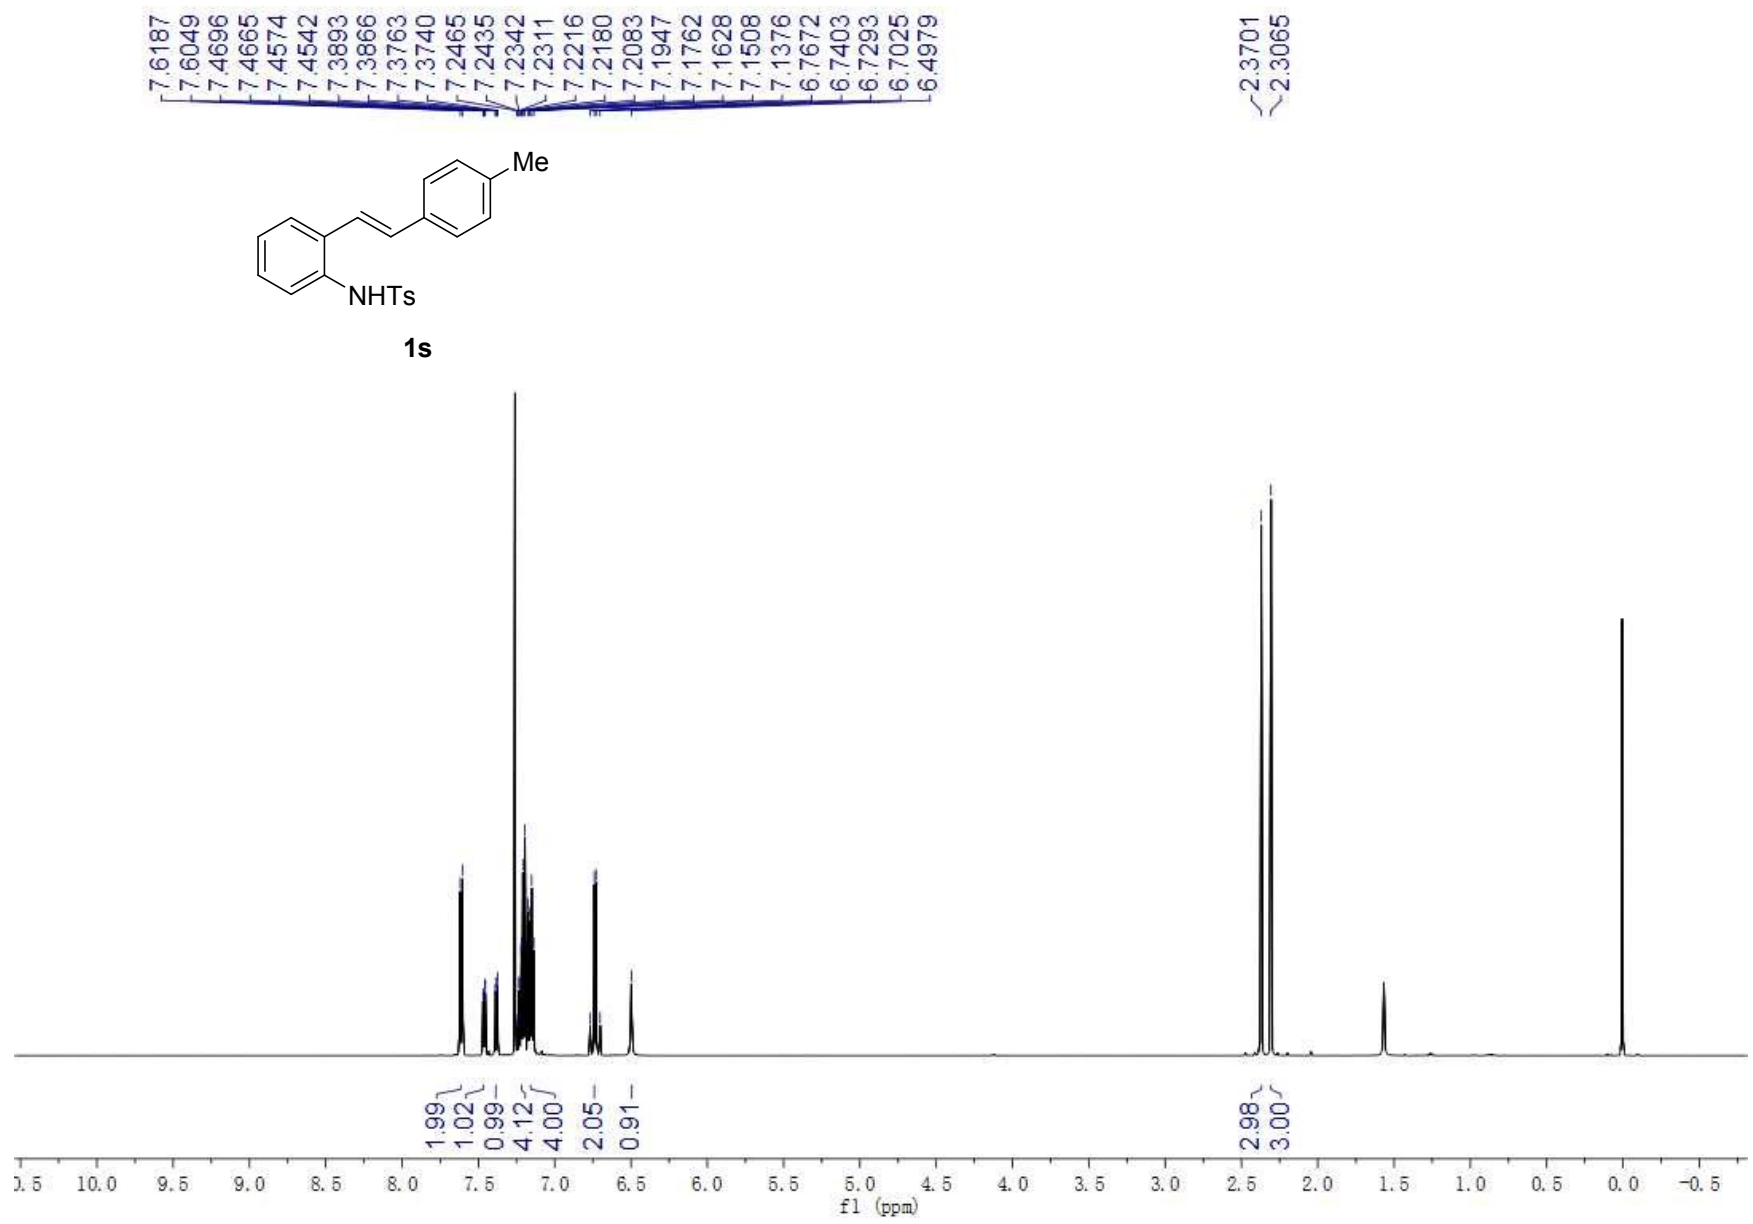

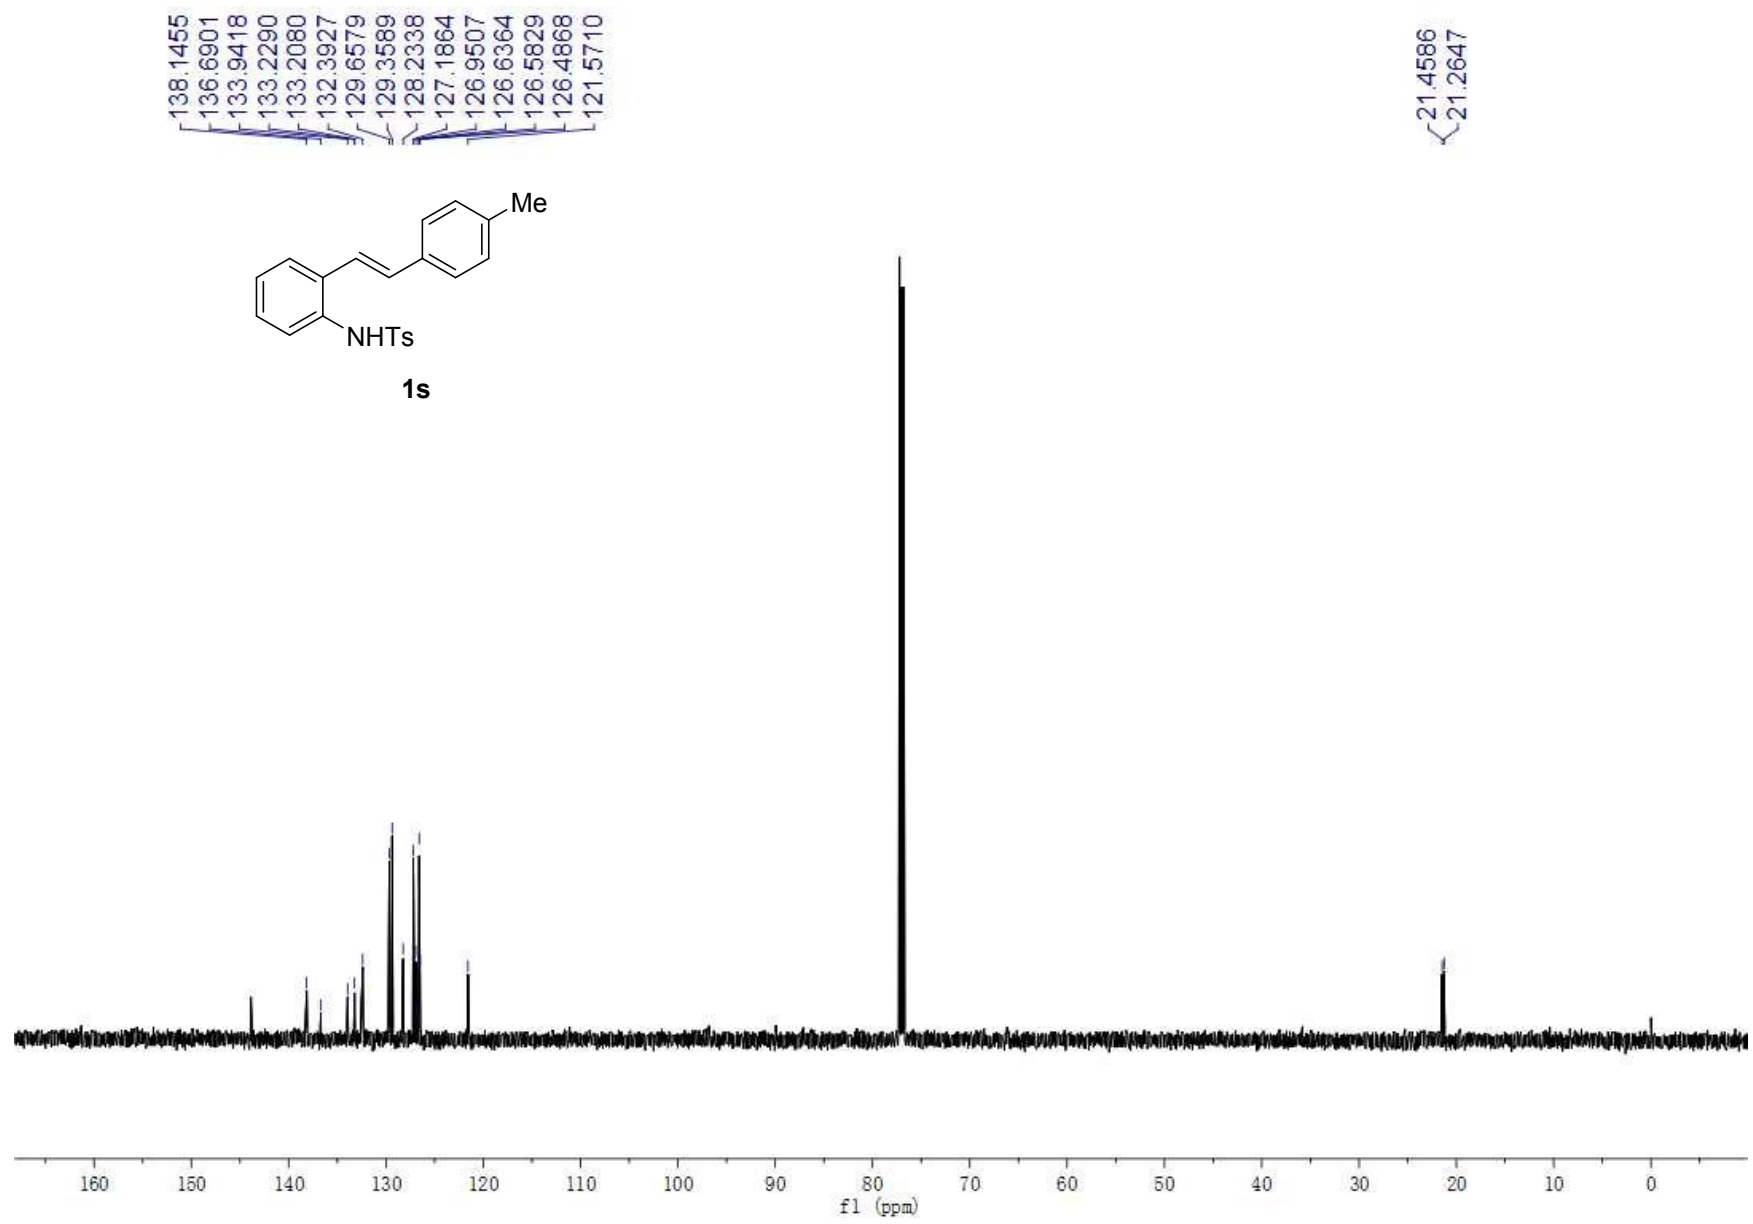

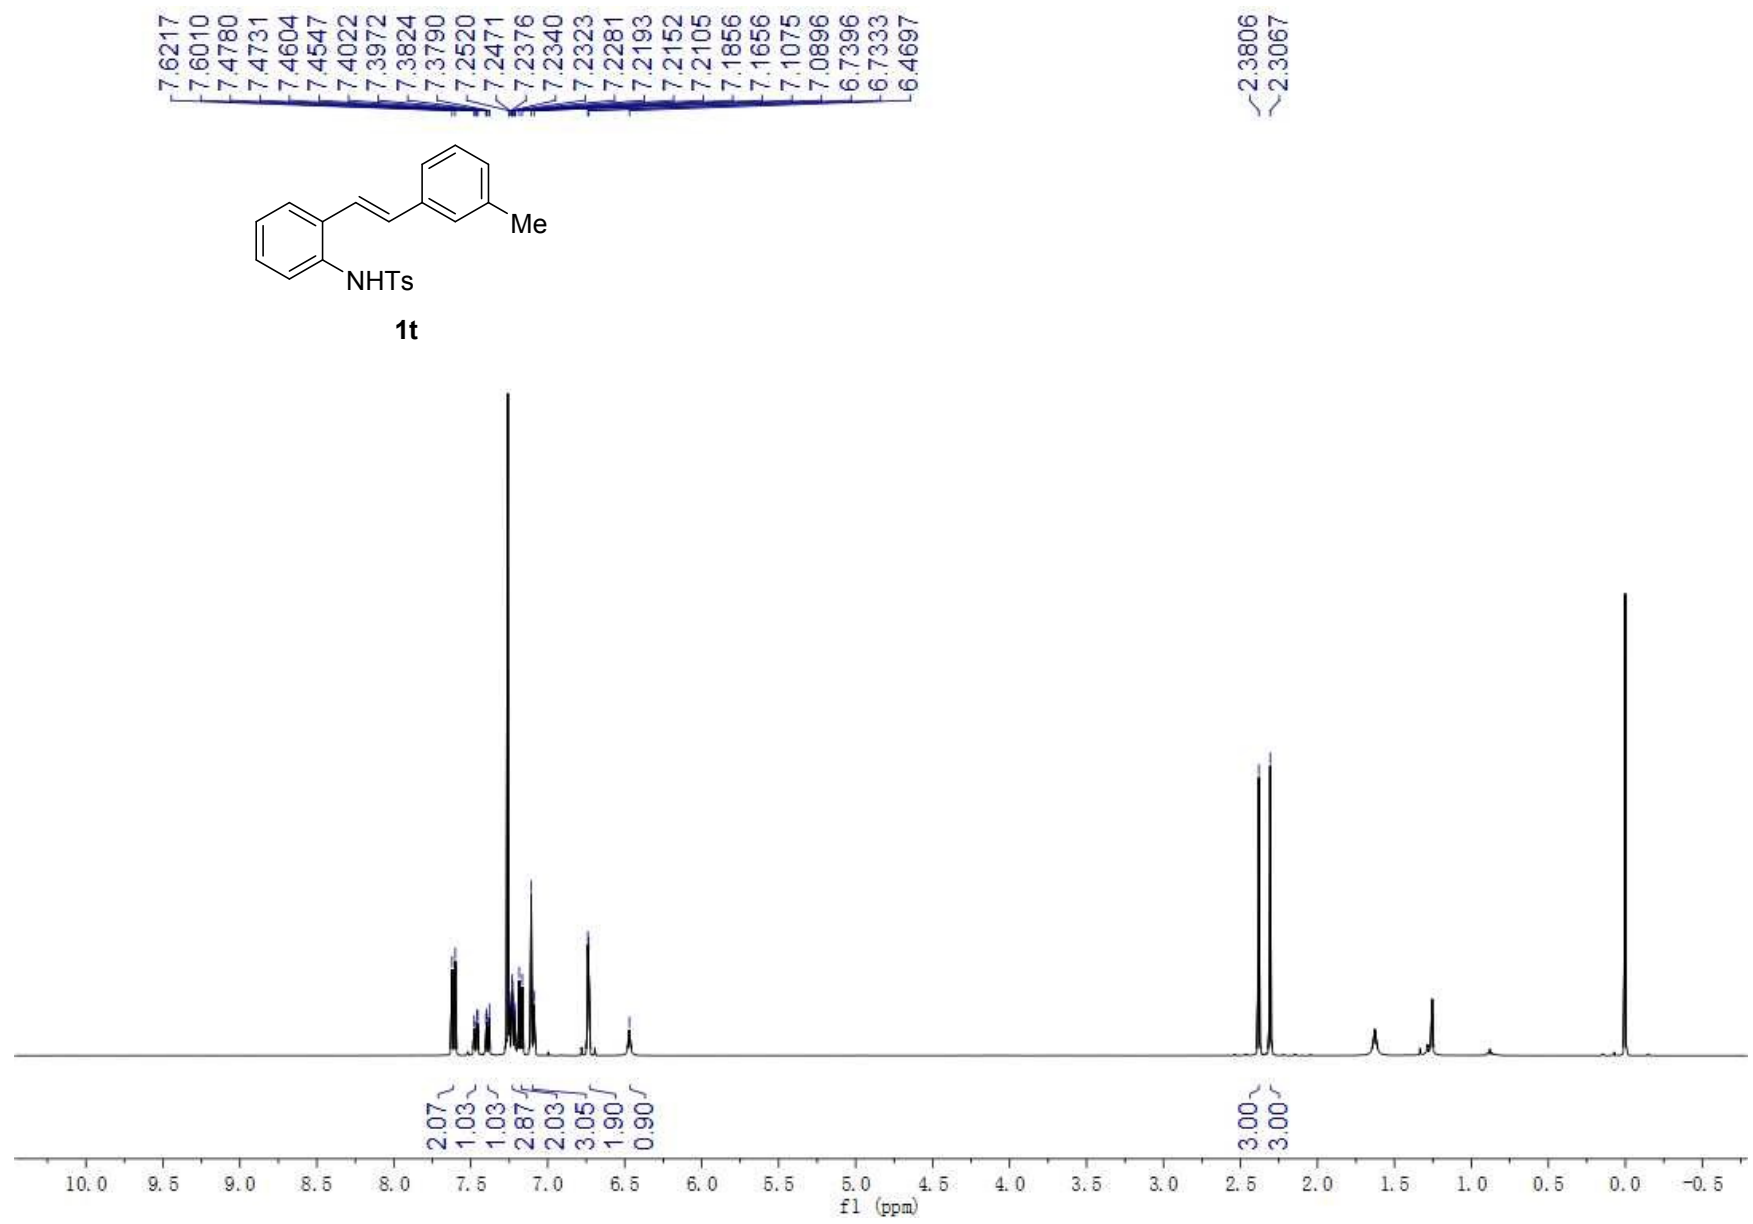

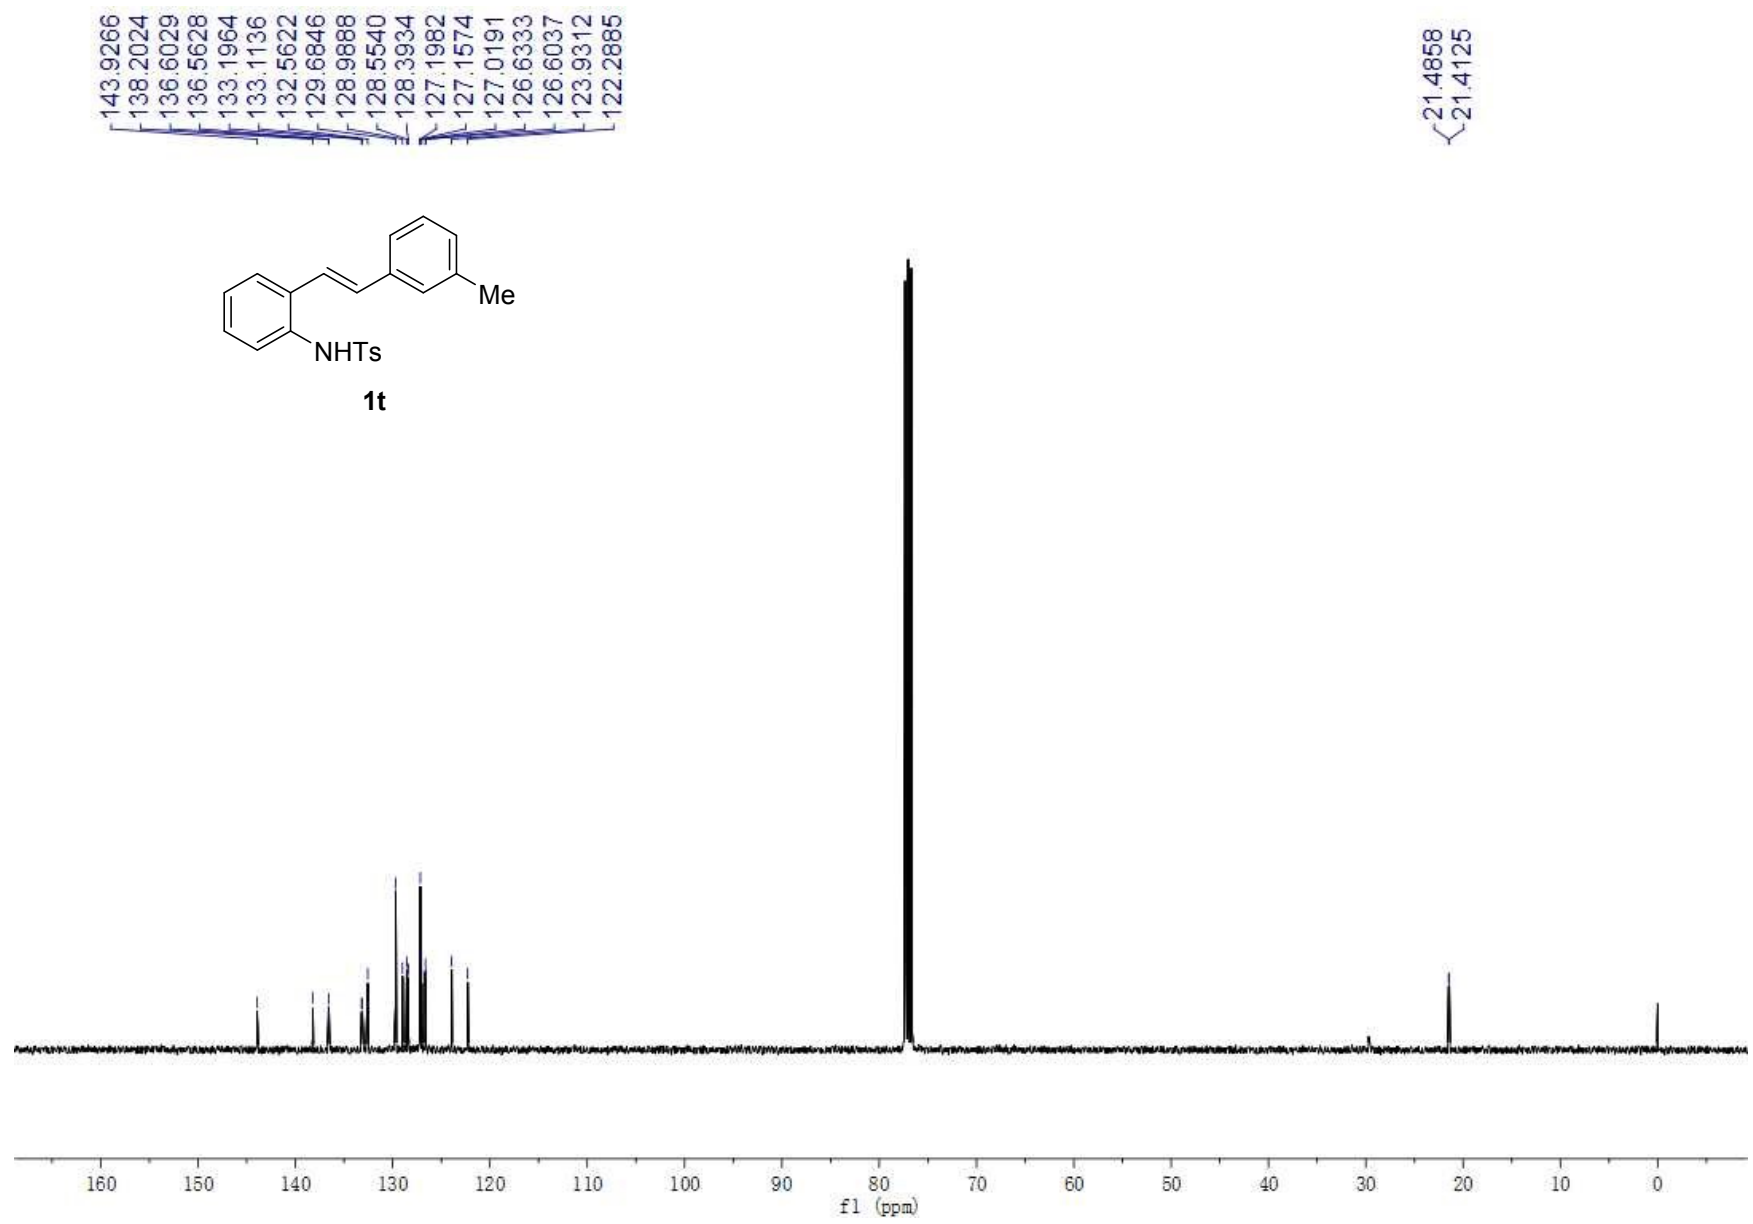

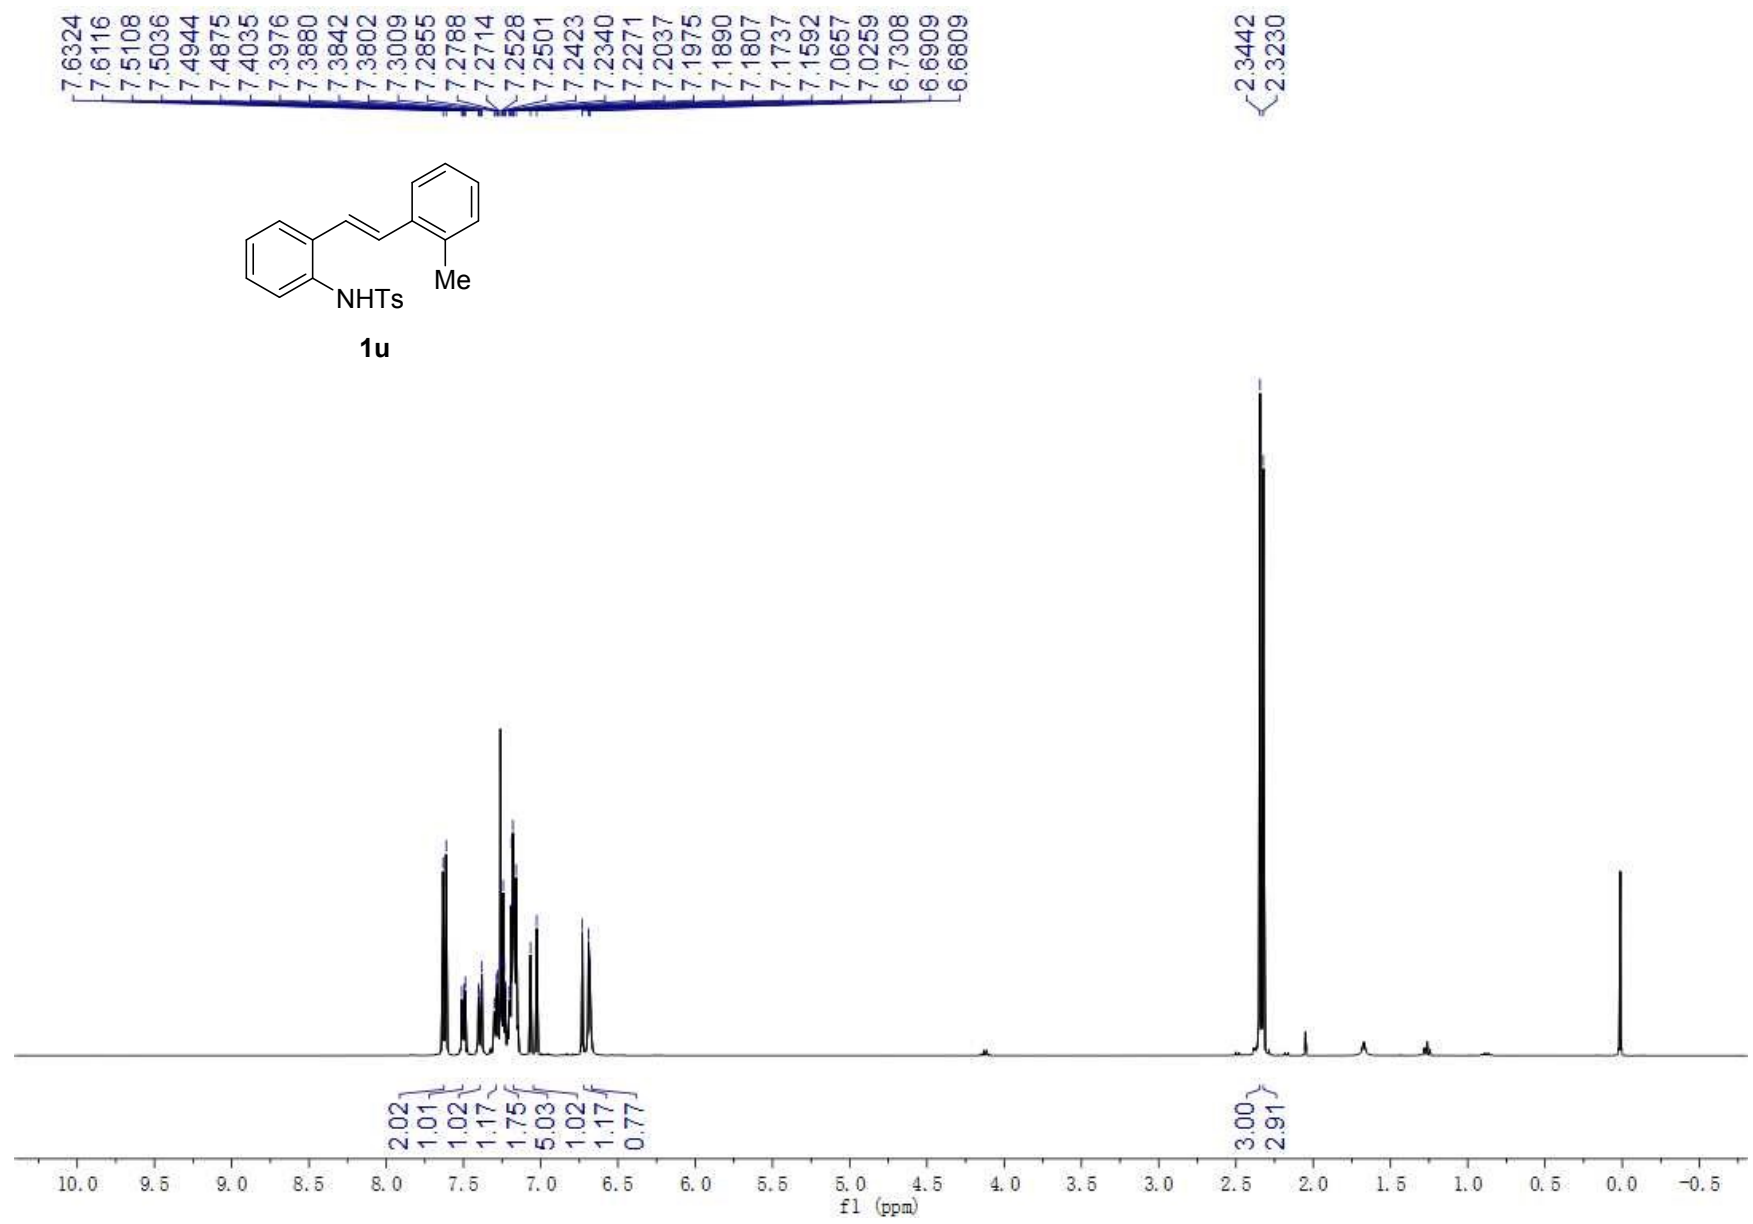



143.9033  
136.6574  
135.8420  
135.7404  
133.3744  
133.3223  
130.4395  
130.1315  
129.6819  
128.4427  
128.0534  
127.2071  
127.0149  
126.7583  
126.5736  
126.2016  
125.4874  
123.9285

21.5169  
19.8655

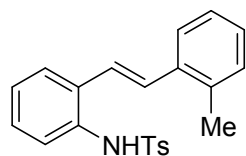

**1u**

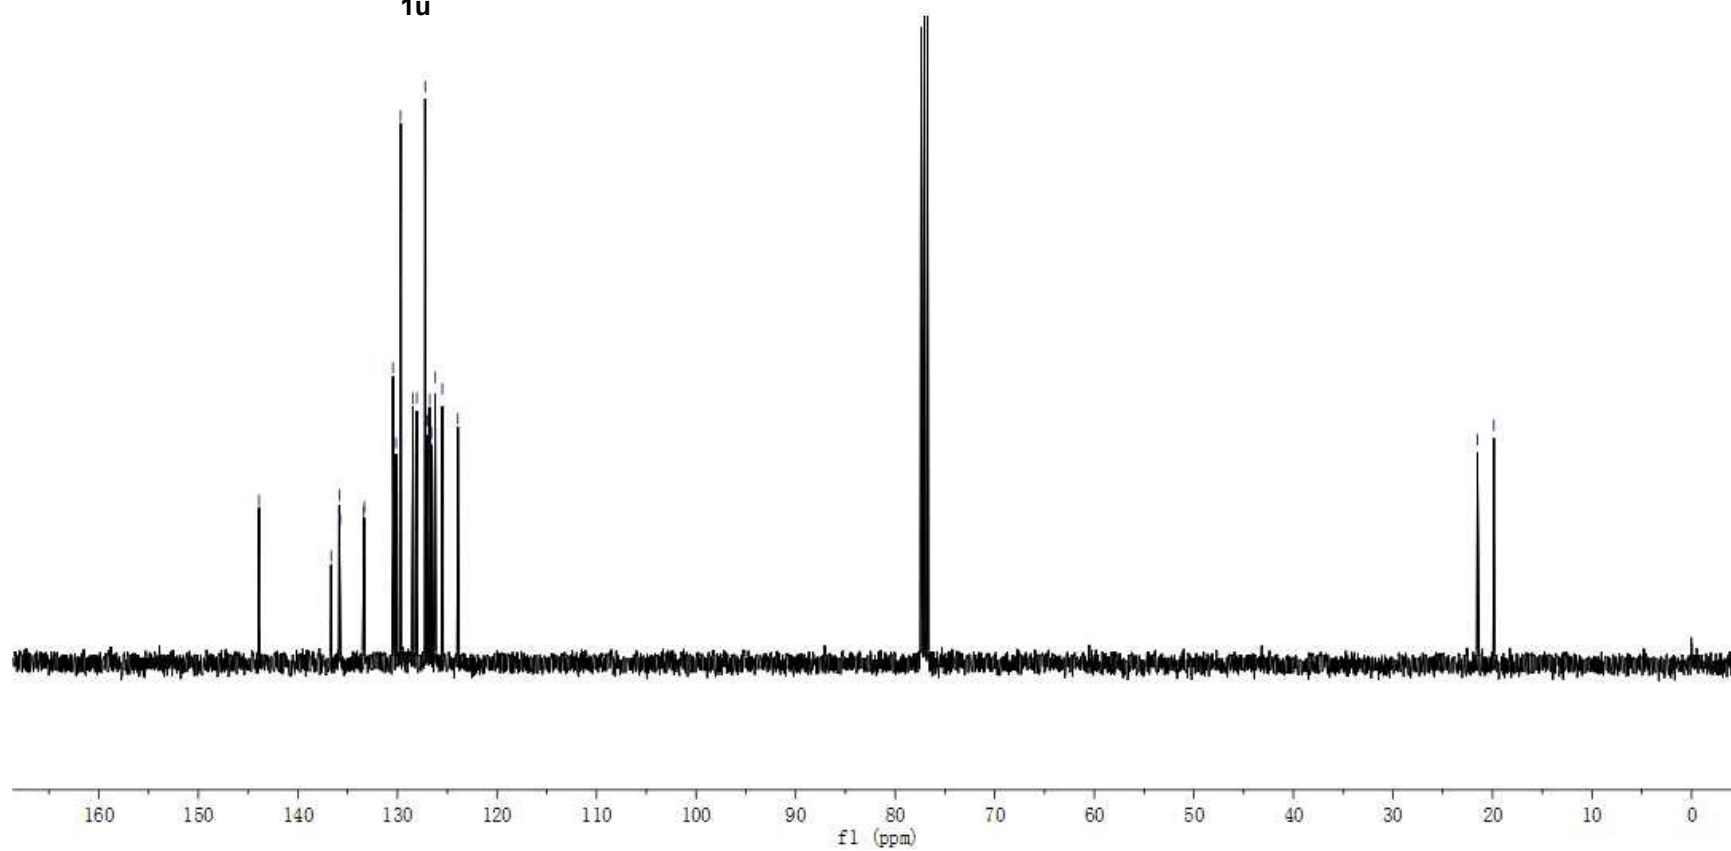

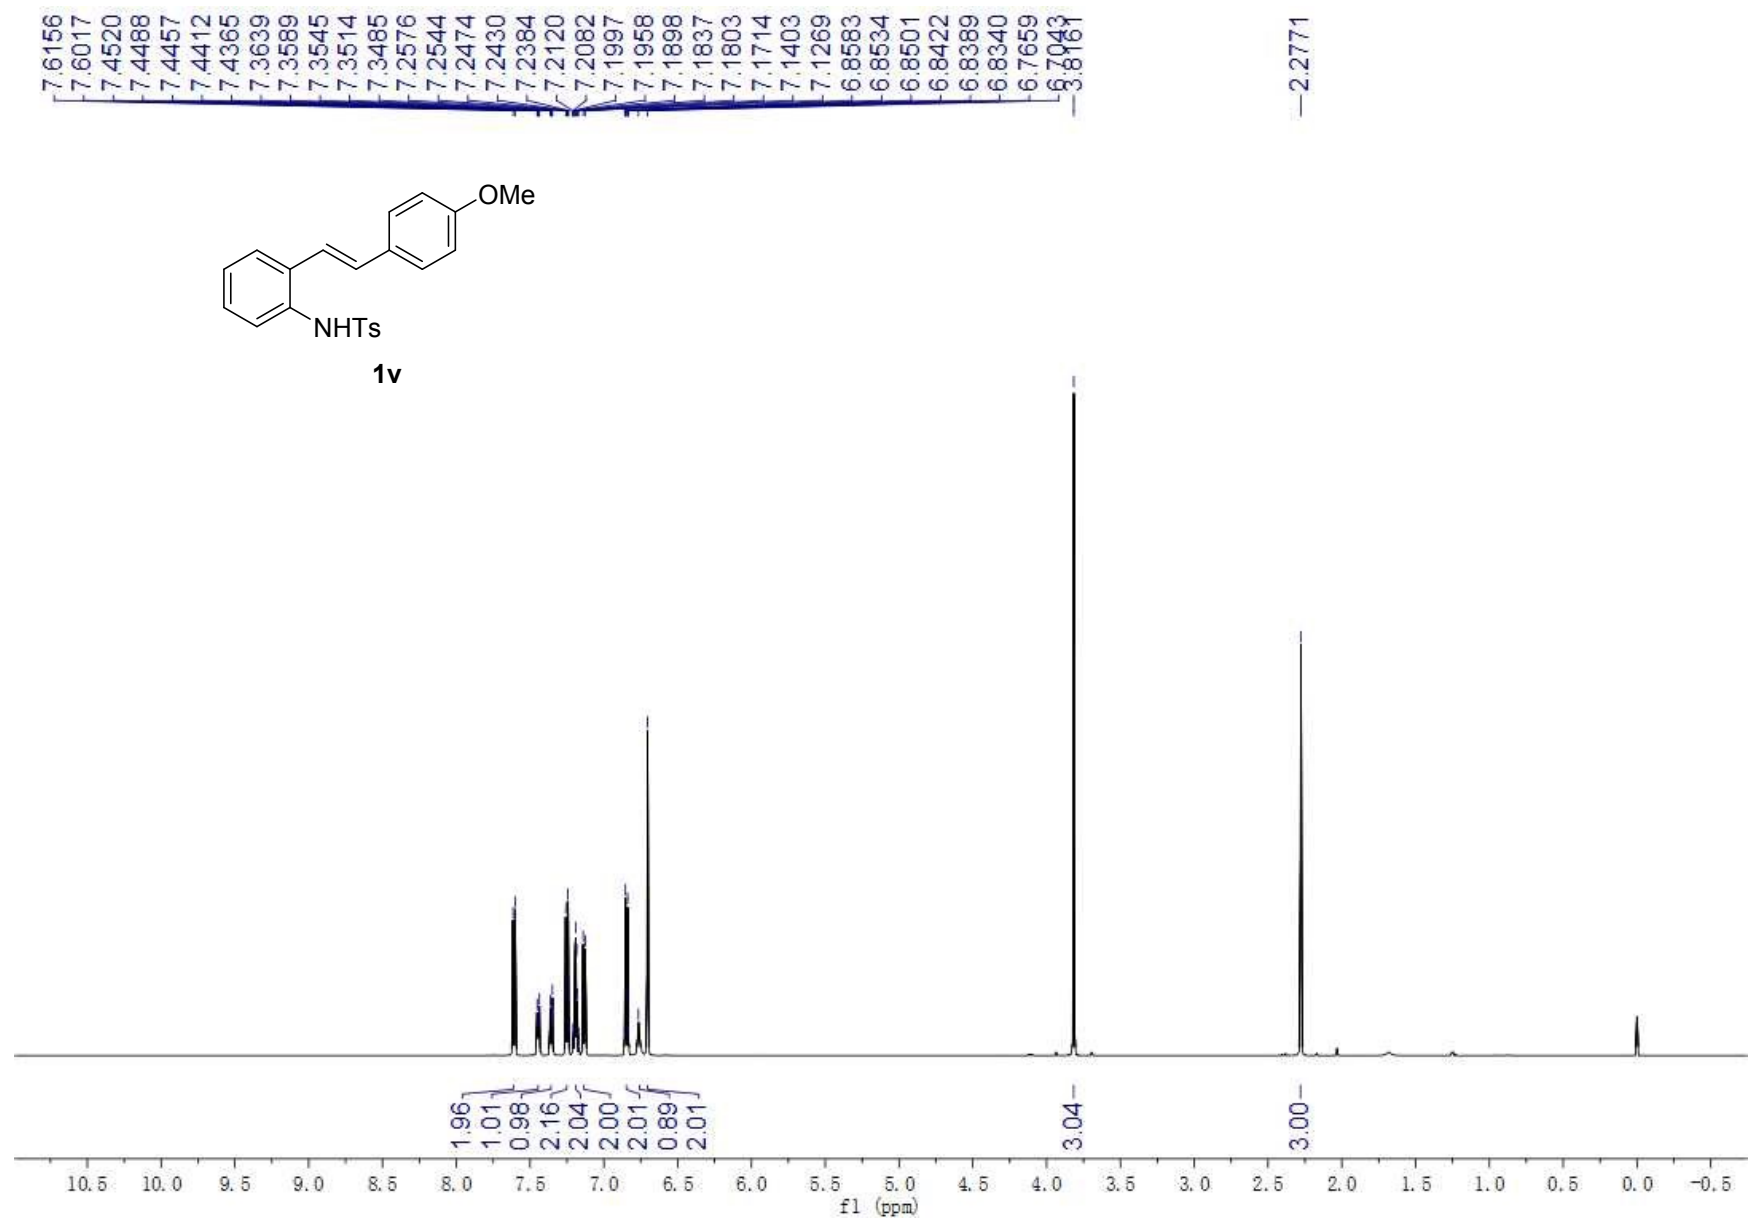

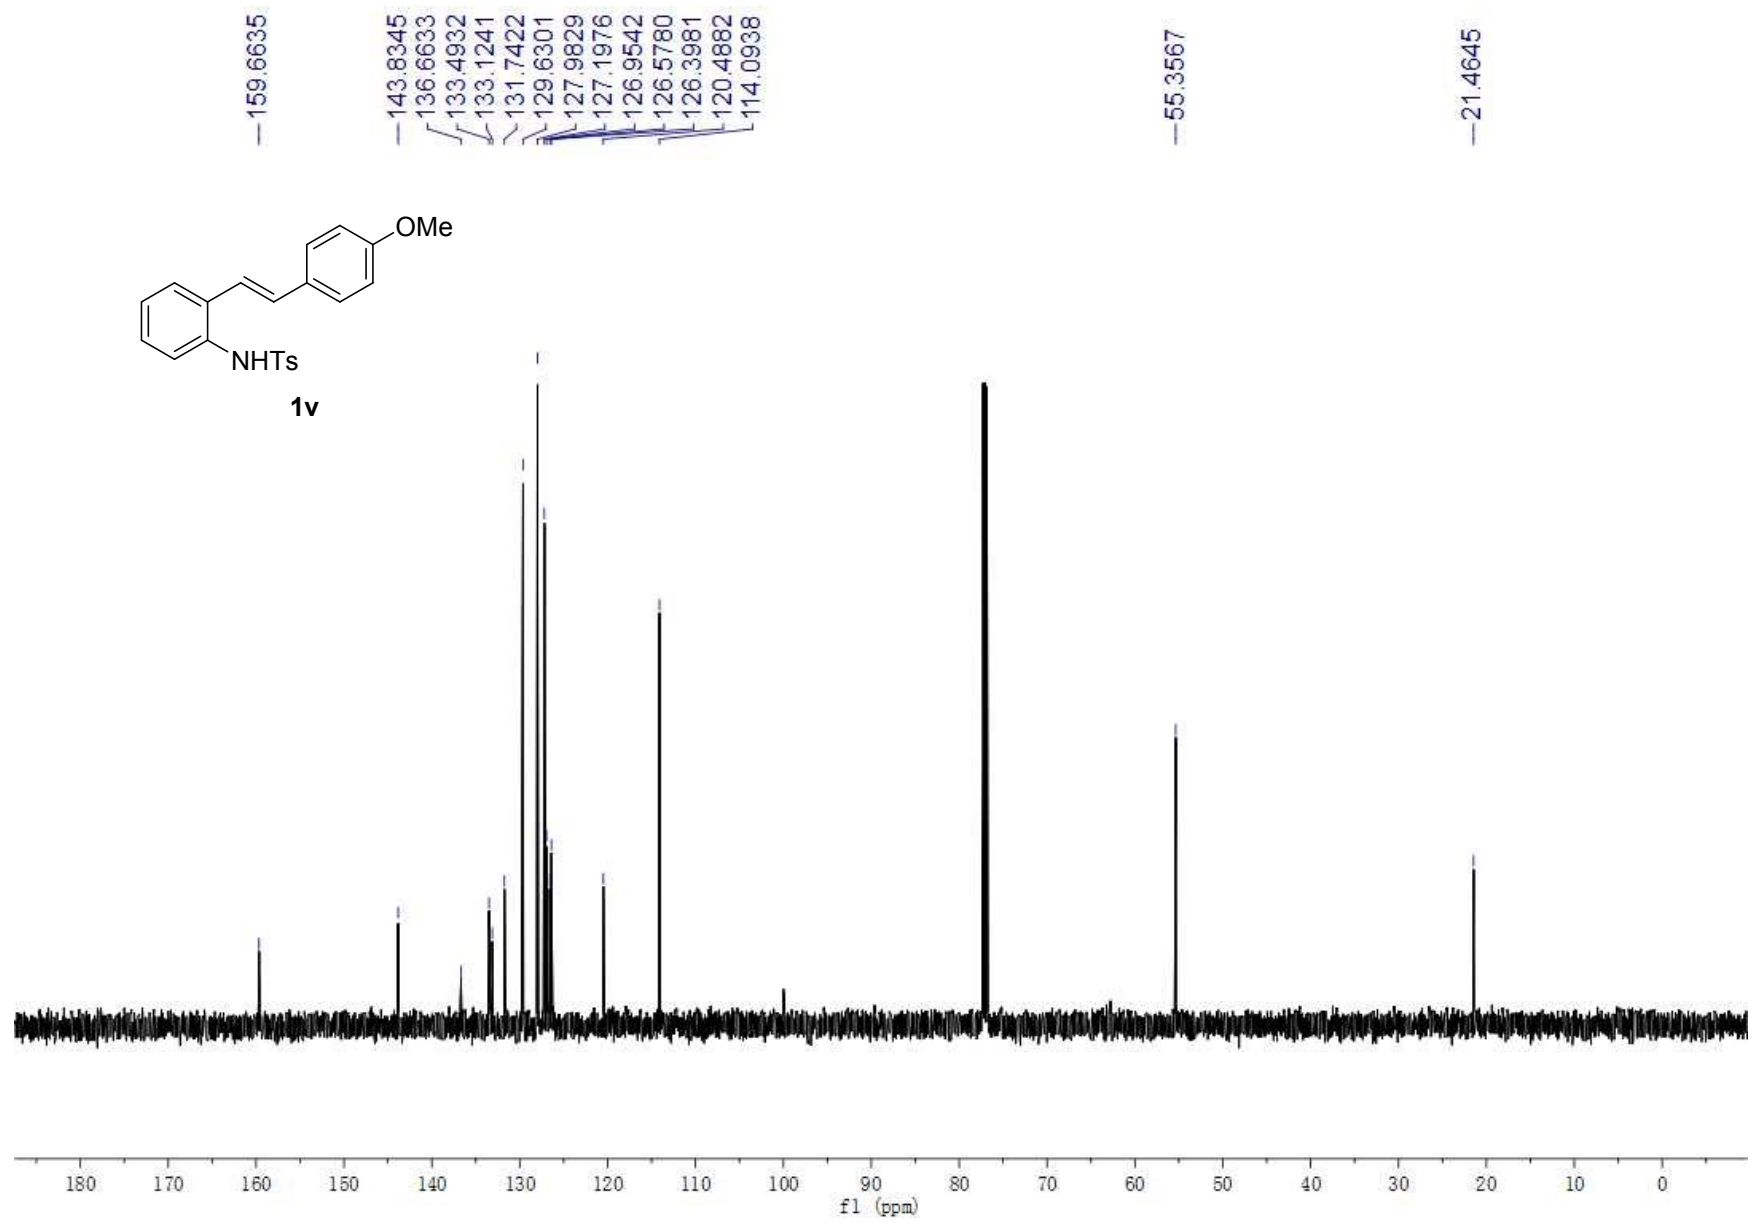

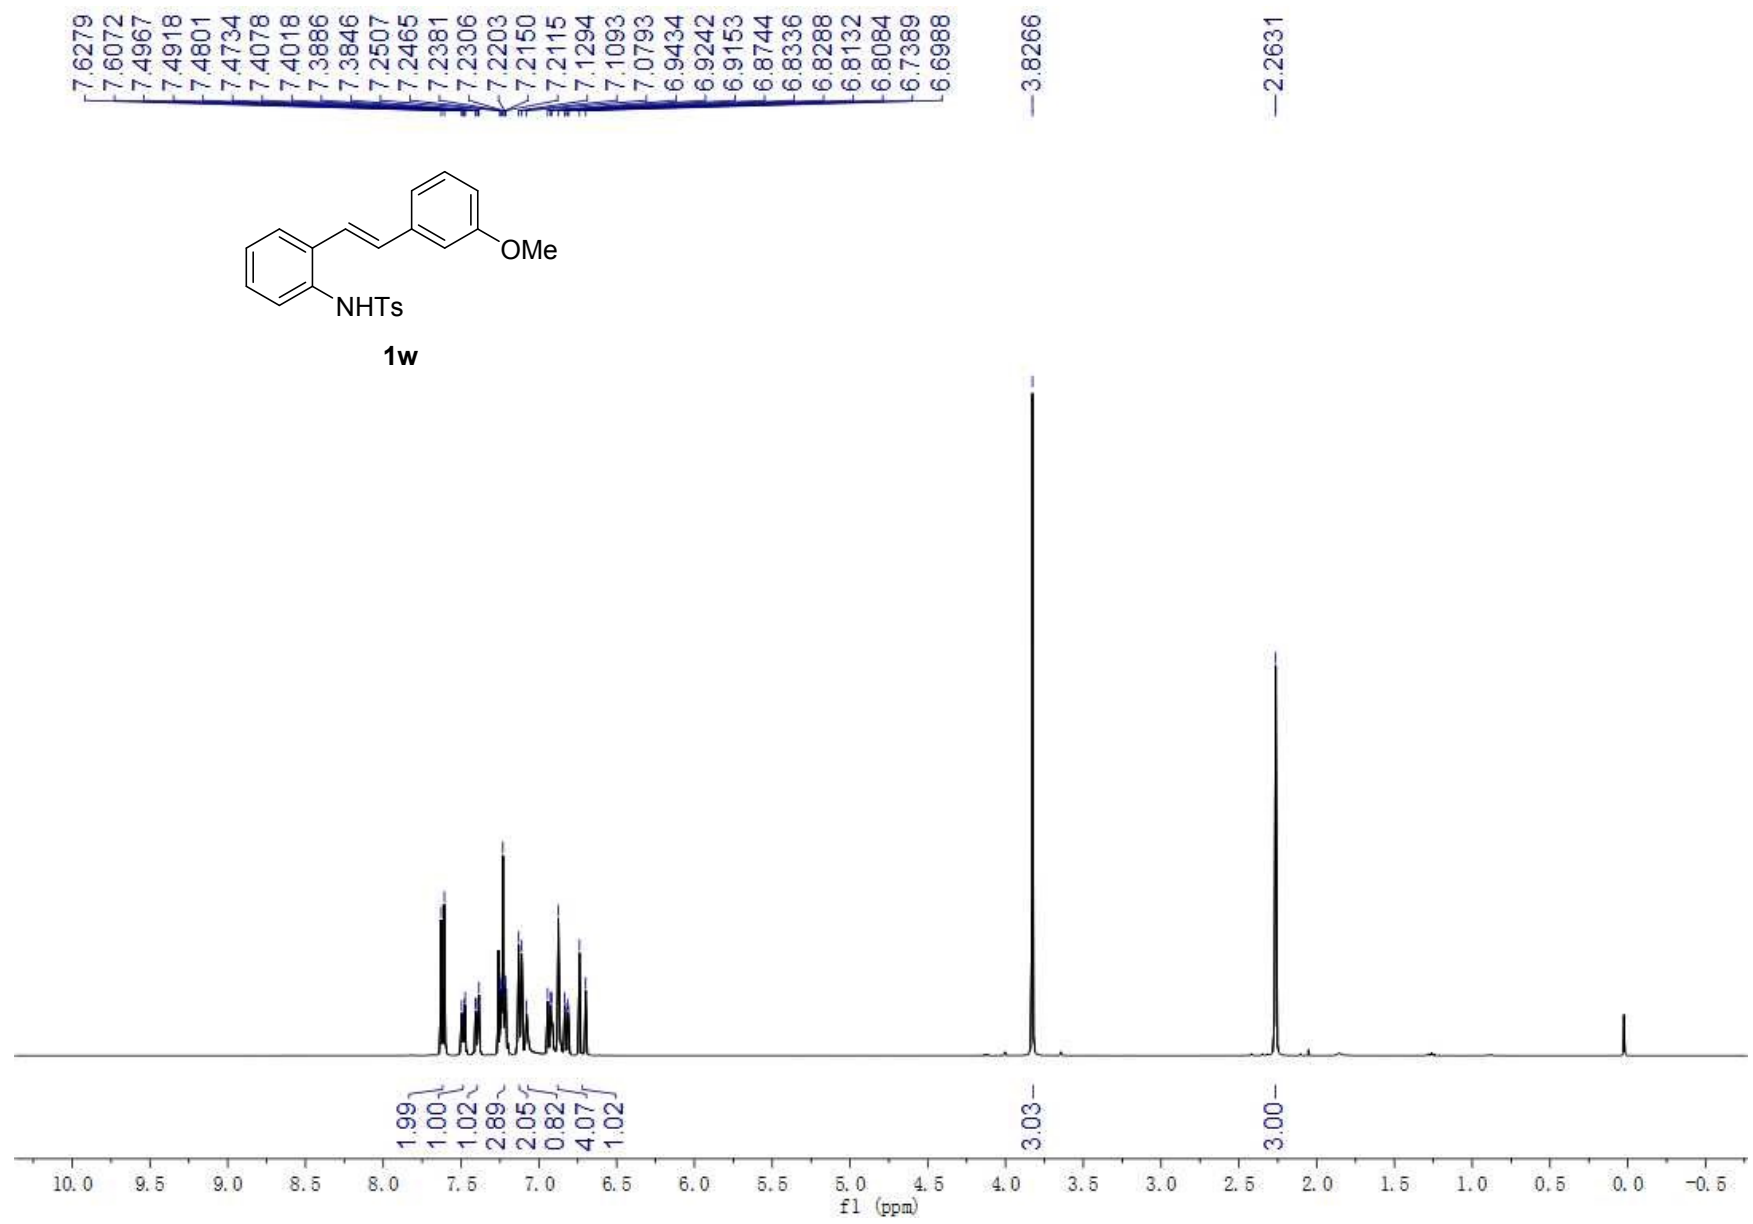

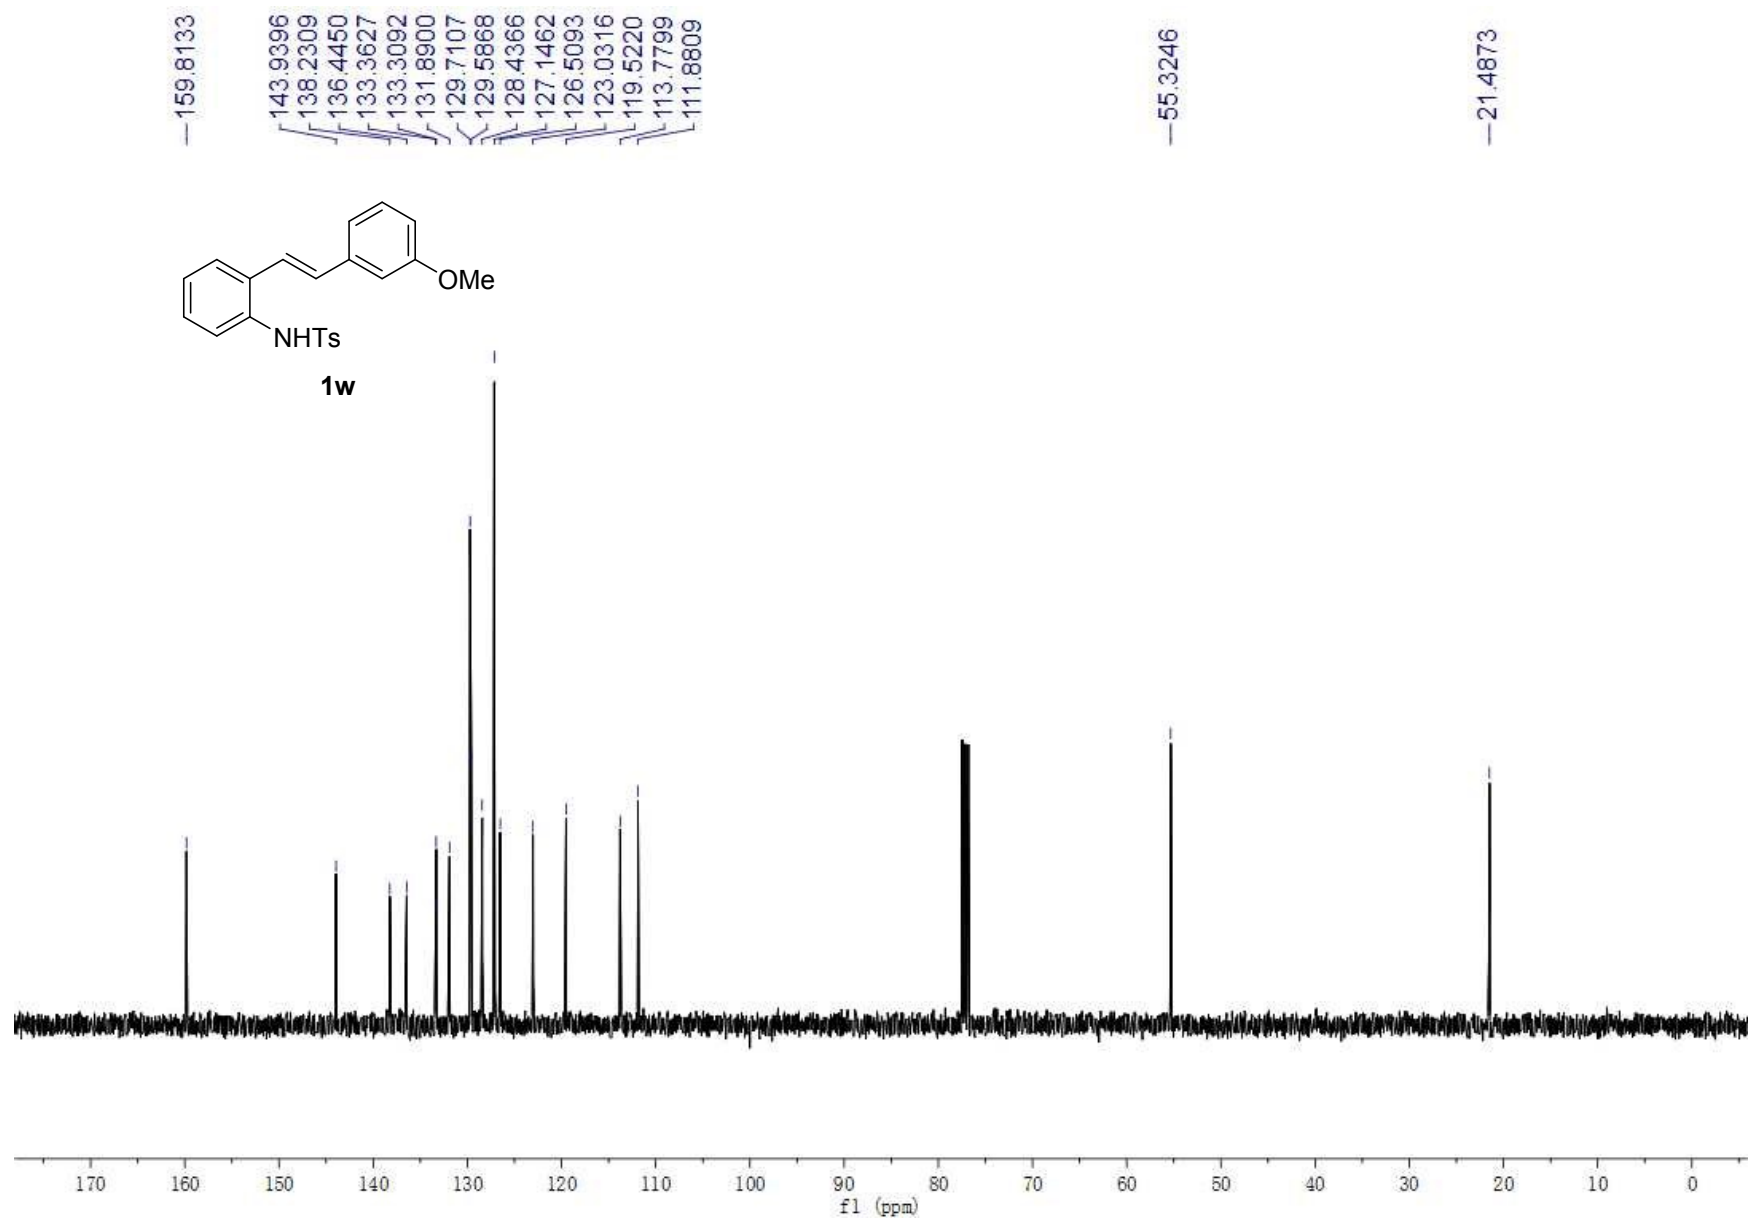

7.6225  
7.6018  
7.5089  
7.5036  
7.4917  
7.4858  
7.4062  
7.4010  
7.3866  
7.3830  
7.2890  
7.2849  
7.2736  
7.2675  
7.2510  
7.2334  
7.2283  
7.2212  
7.2158  
7.2094  
7.2028  
7.1988  
7.1791  
7.1674  
7.1589  
7.1269  
6.9617  
6.9429  
6.9242  
6.9021  
6.8809  
6.7992  
6.7585  
6.5085  
-3.8672

-2.3080

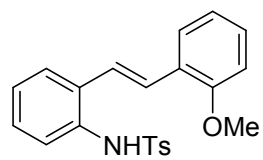

**1x**

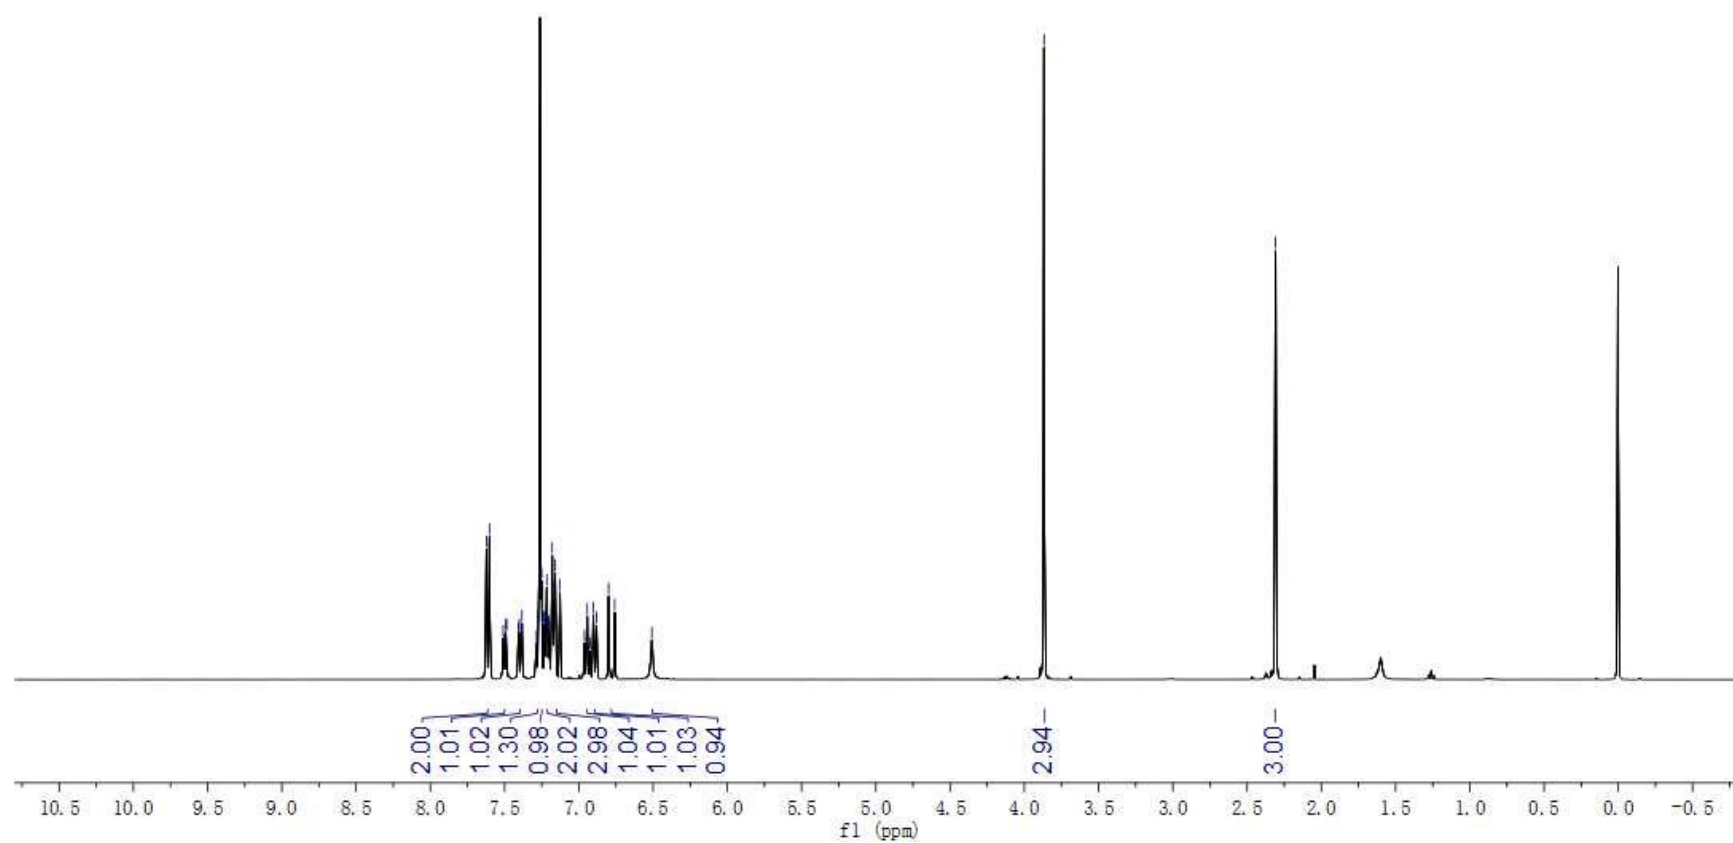

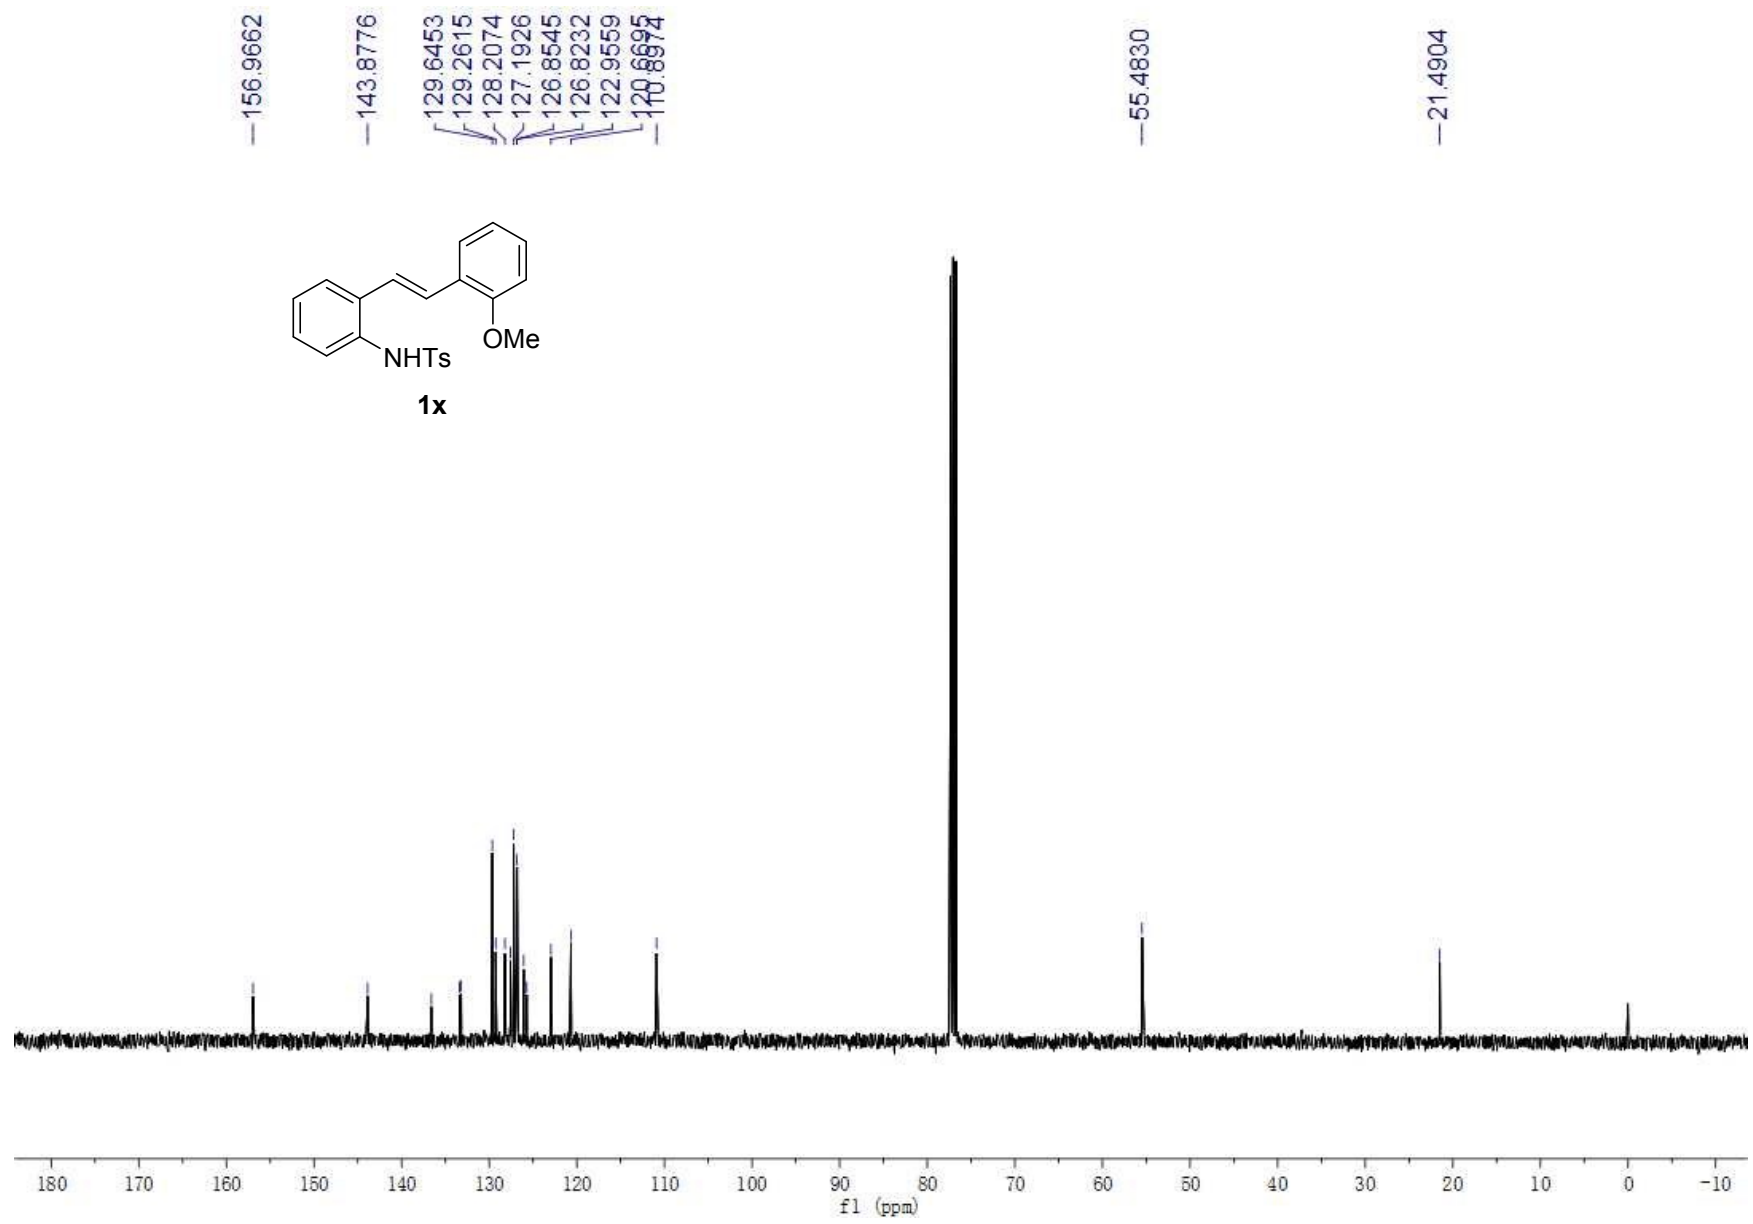

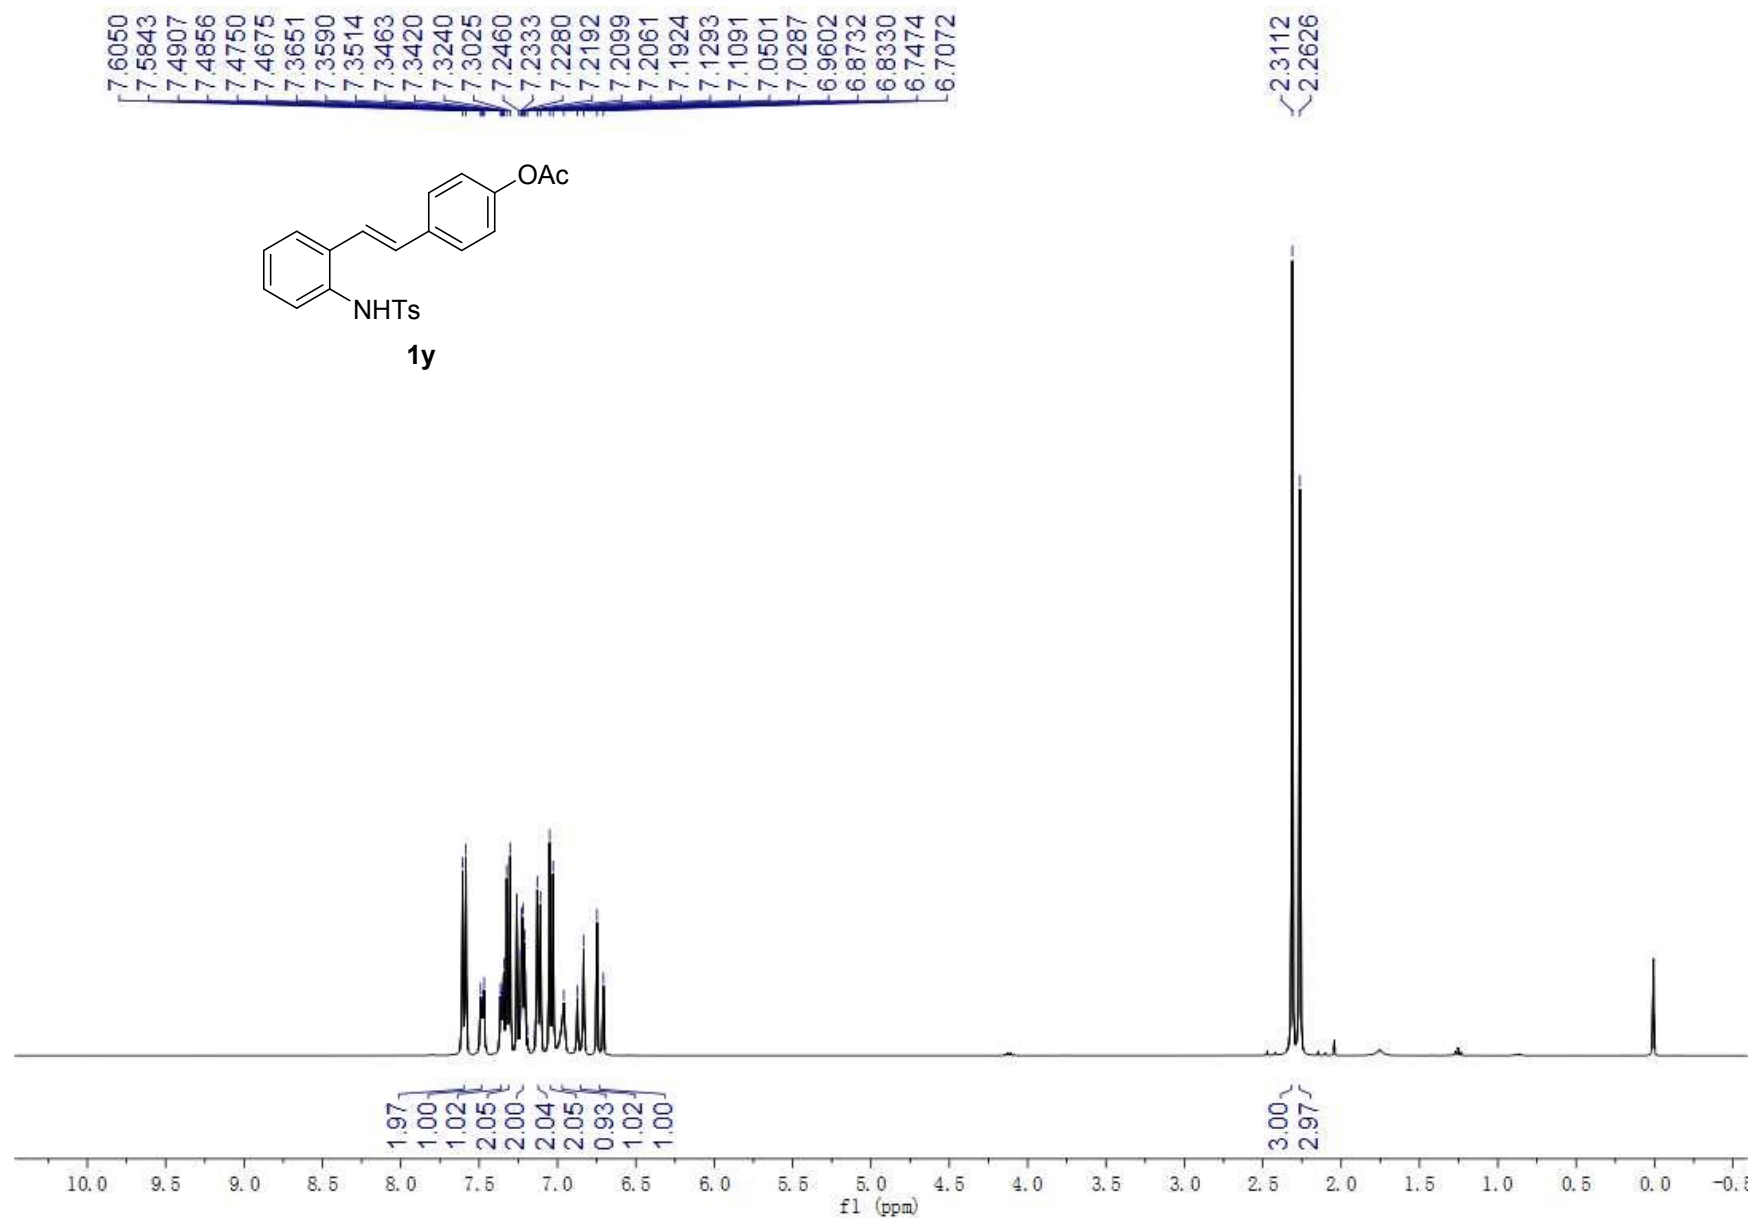



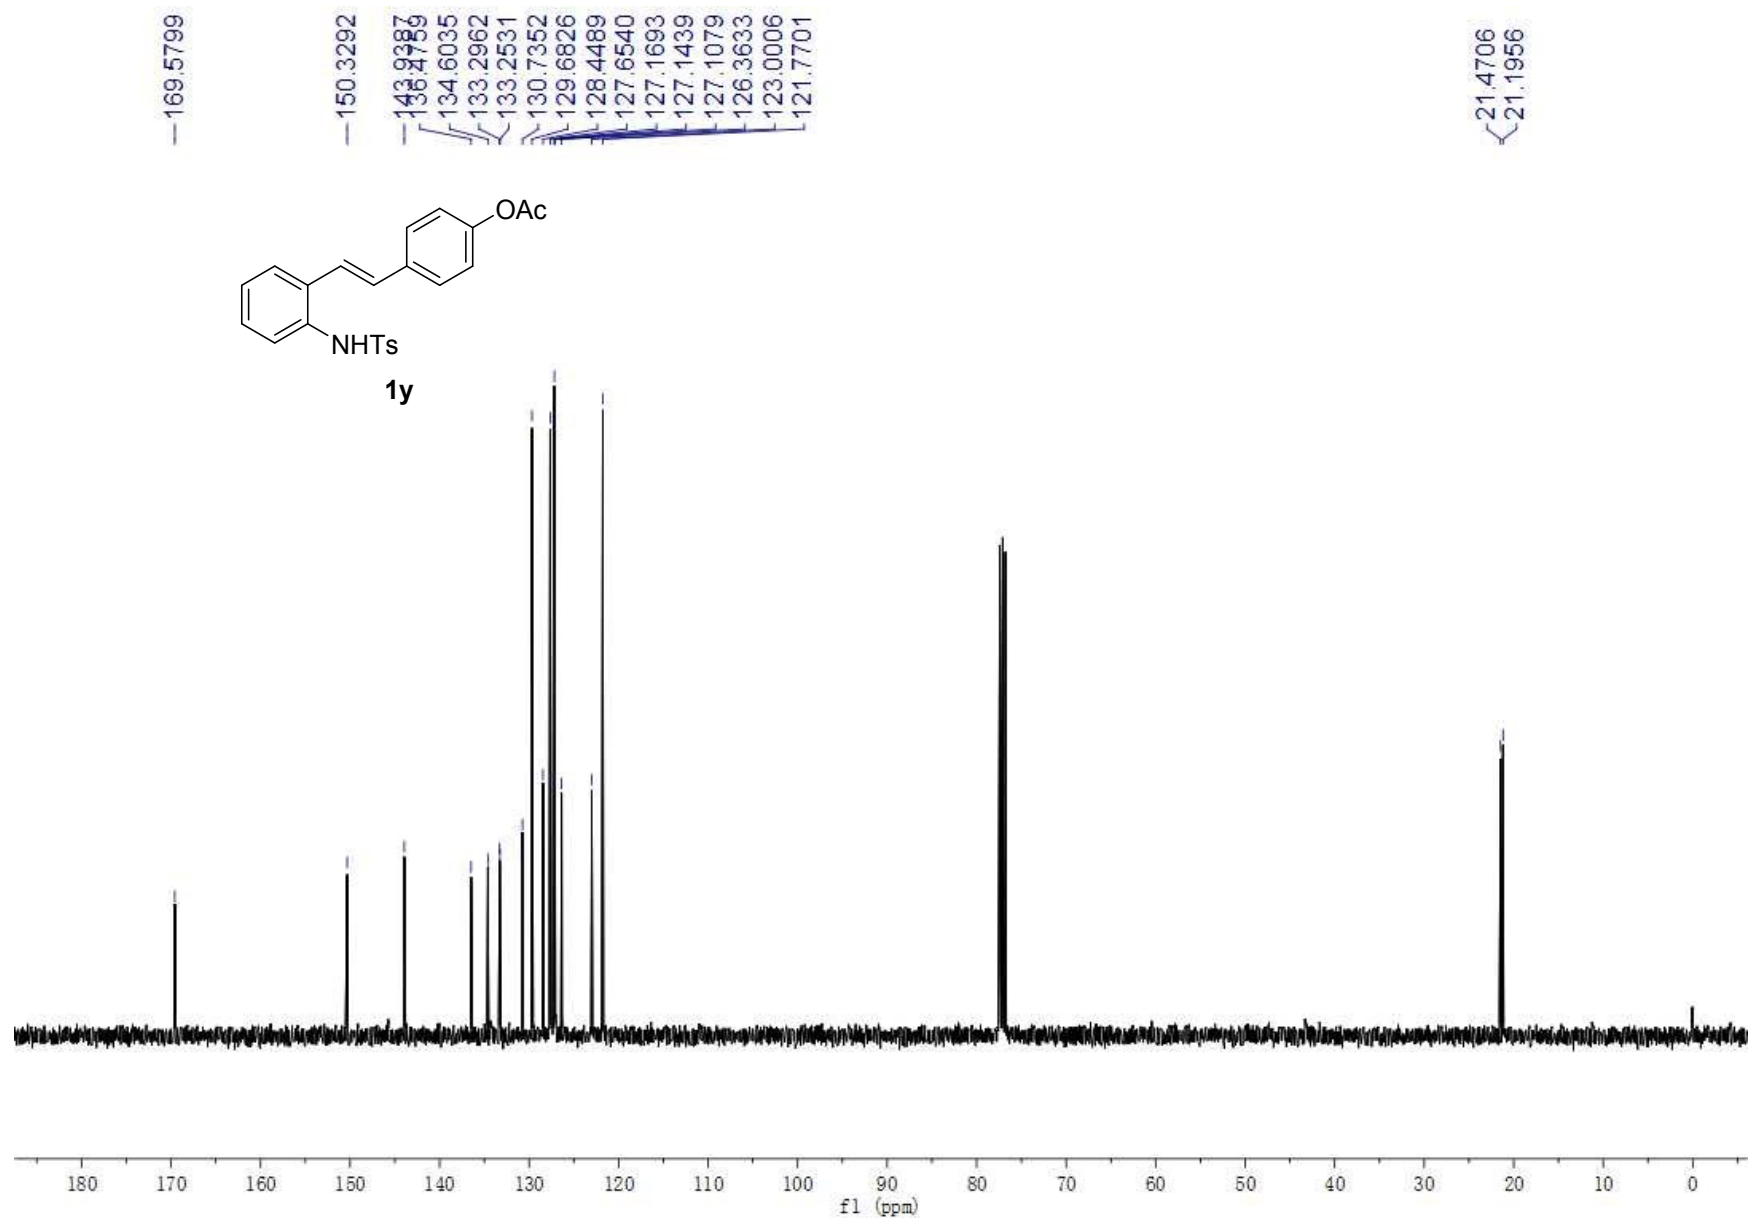

7.6124  
7.5986  
7.4251  
7.4224  
7.4130  
7.4114  
7.4006  
7.3984  
7.2468  
7.2441  
7.2345  
7.2316  
7.2219  
7.2187  
7.2144  
7.2117  
7.2090  
7.2054  
7.2018  
7.1993  
7.1895  
7.1877  
7.1598  
7.1465  
6.9855  
6.9797  
6.9746  
6.9722  
6.8875  
6.8611  
6.7206  
6.6038  
6.5774

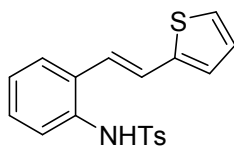

1z

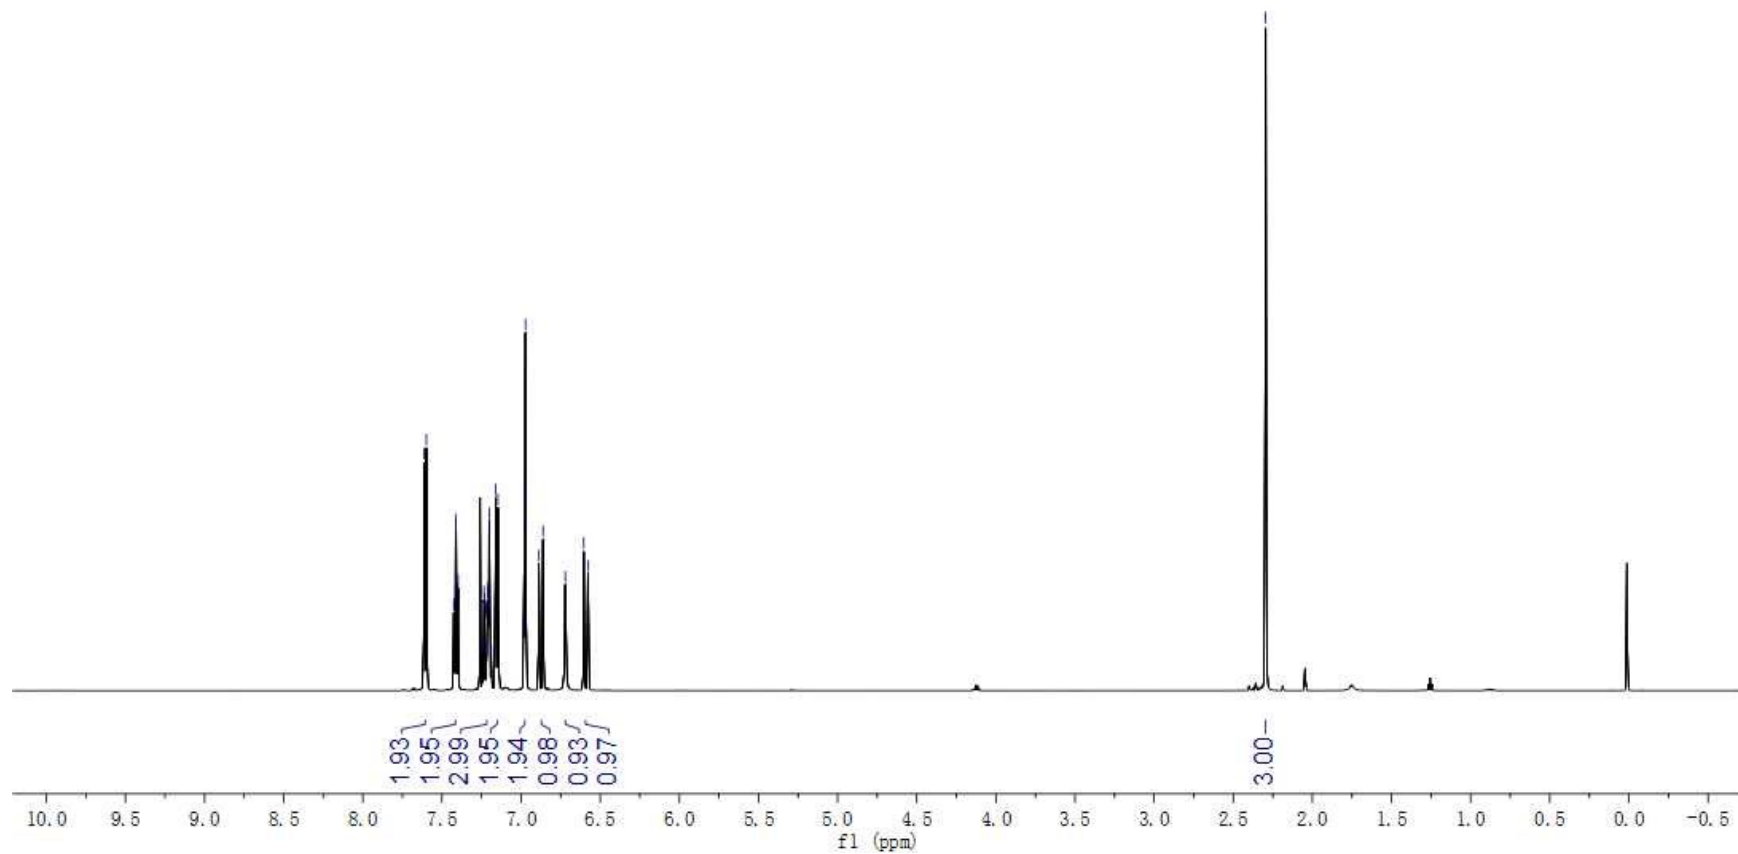

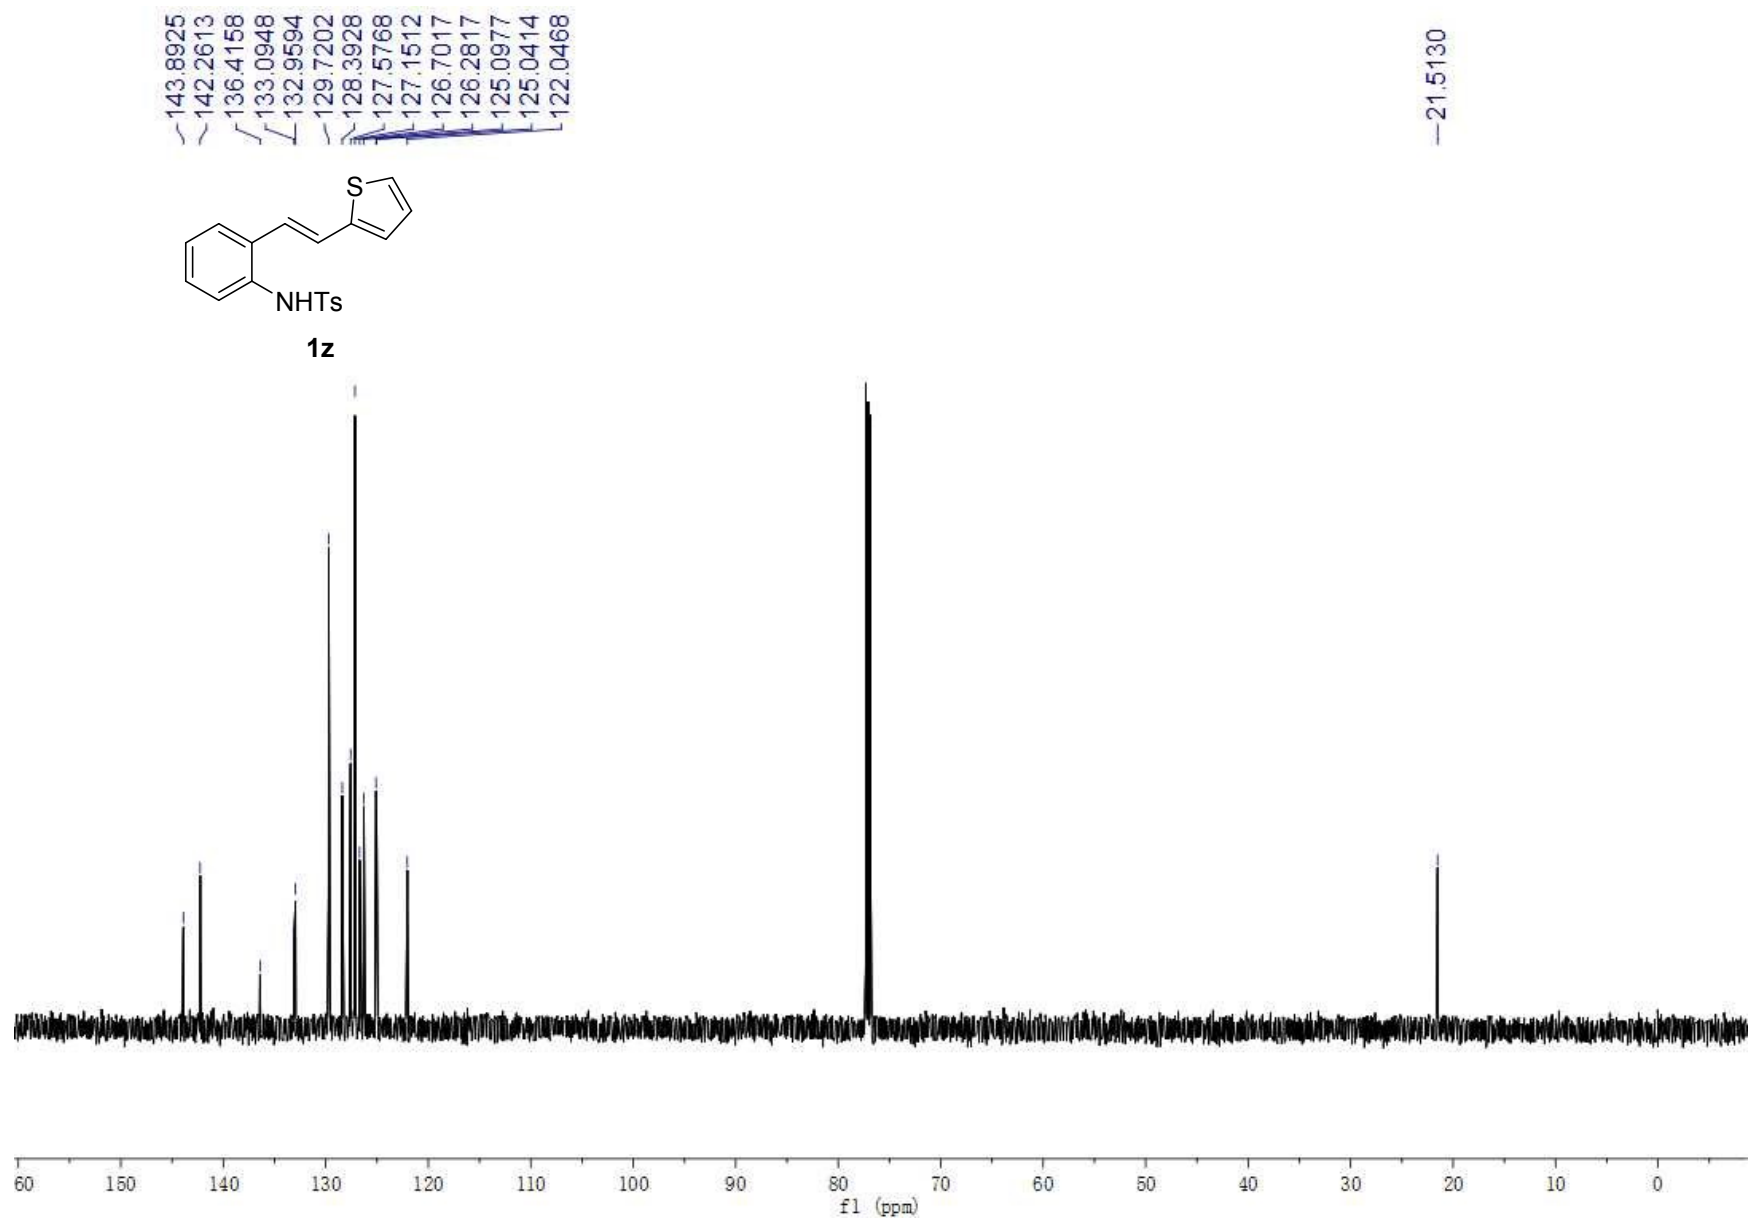

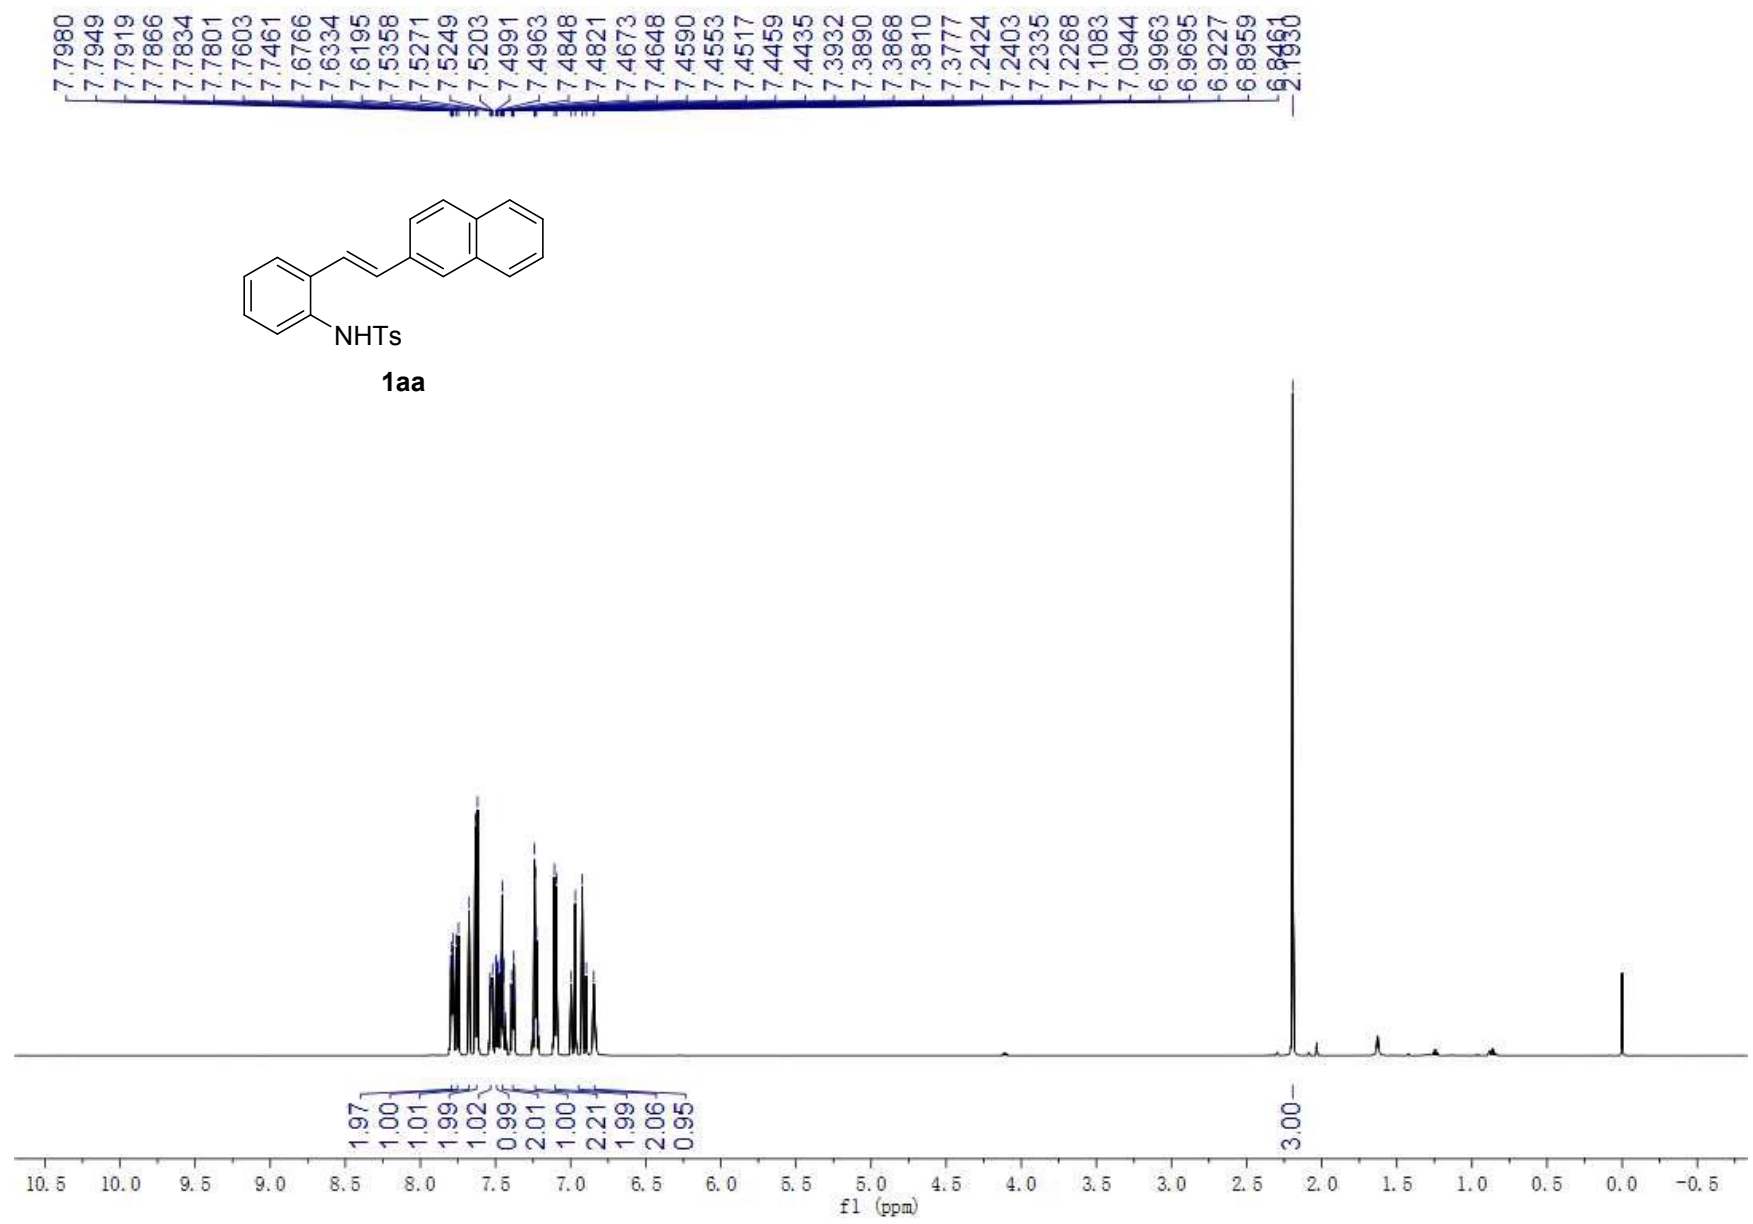

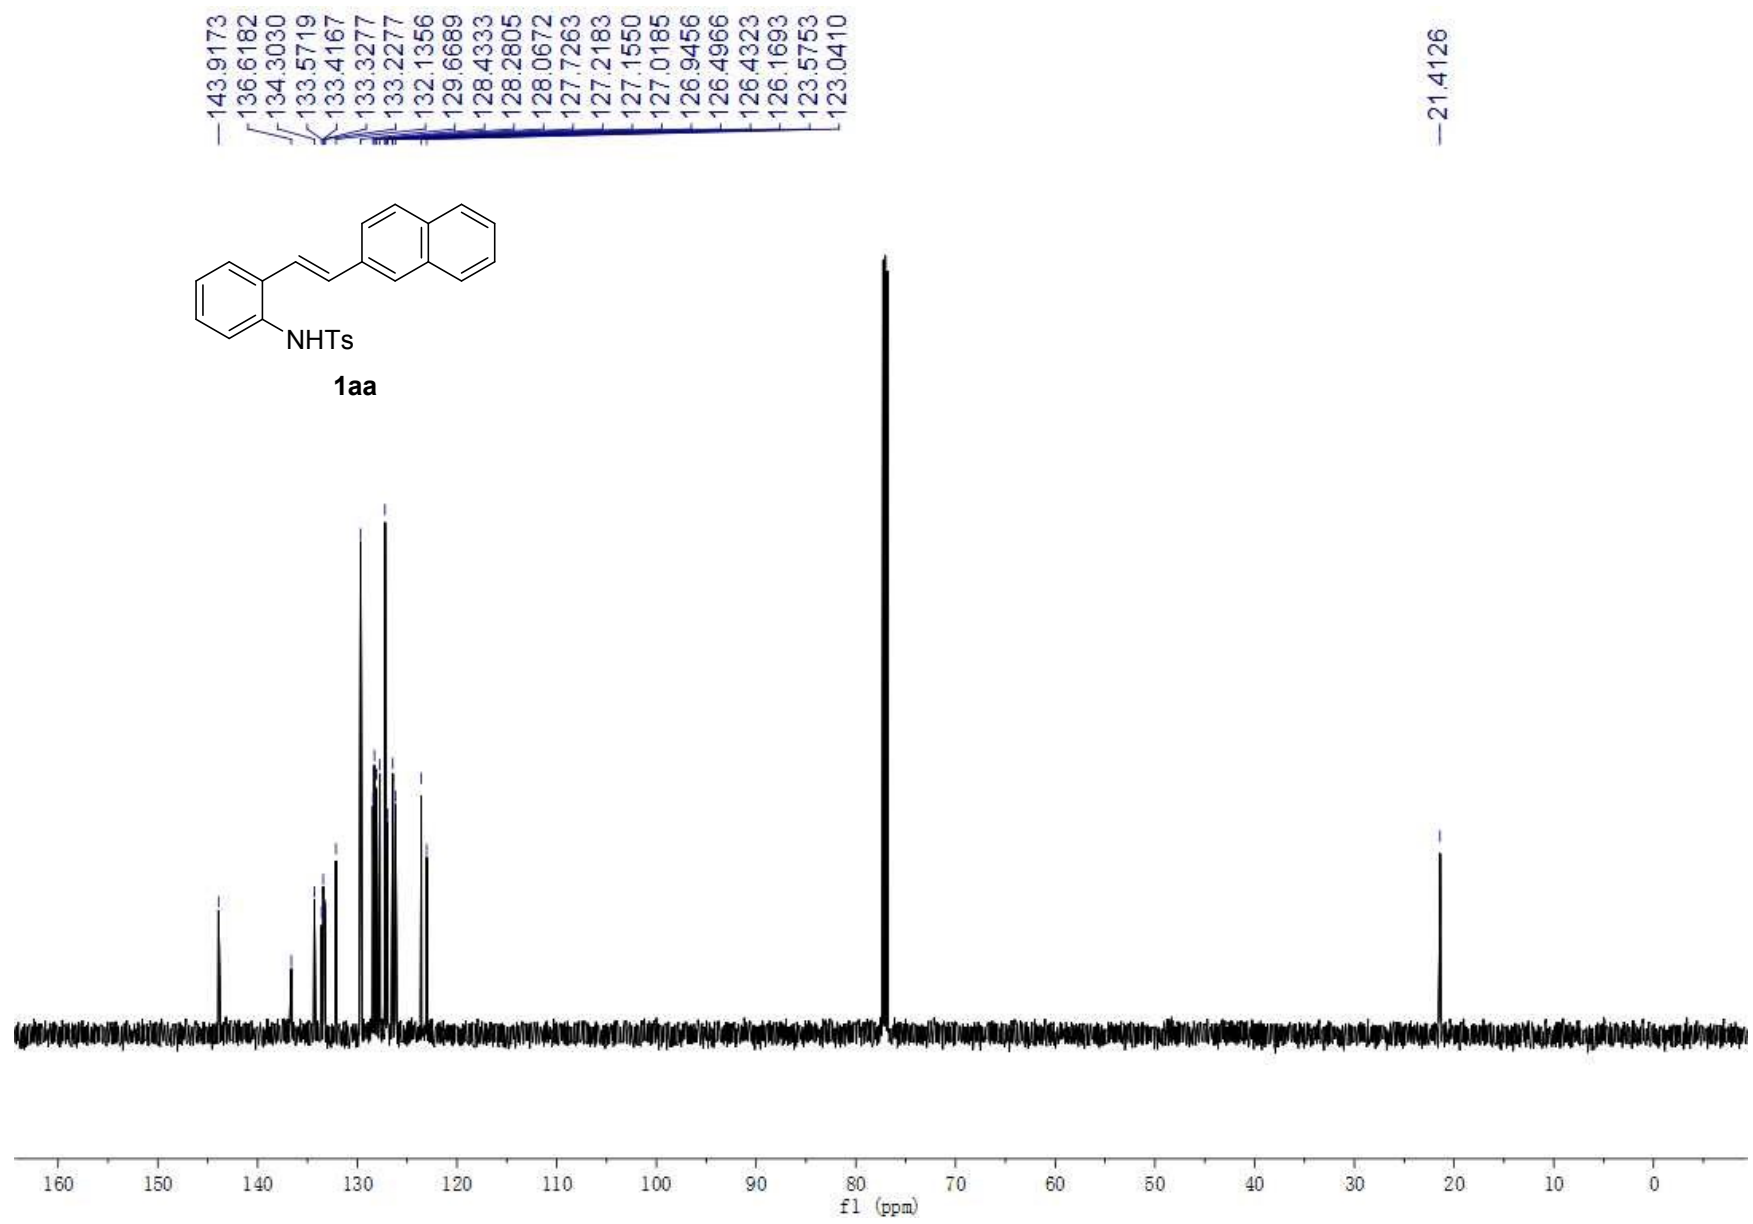

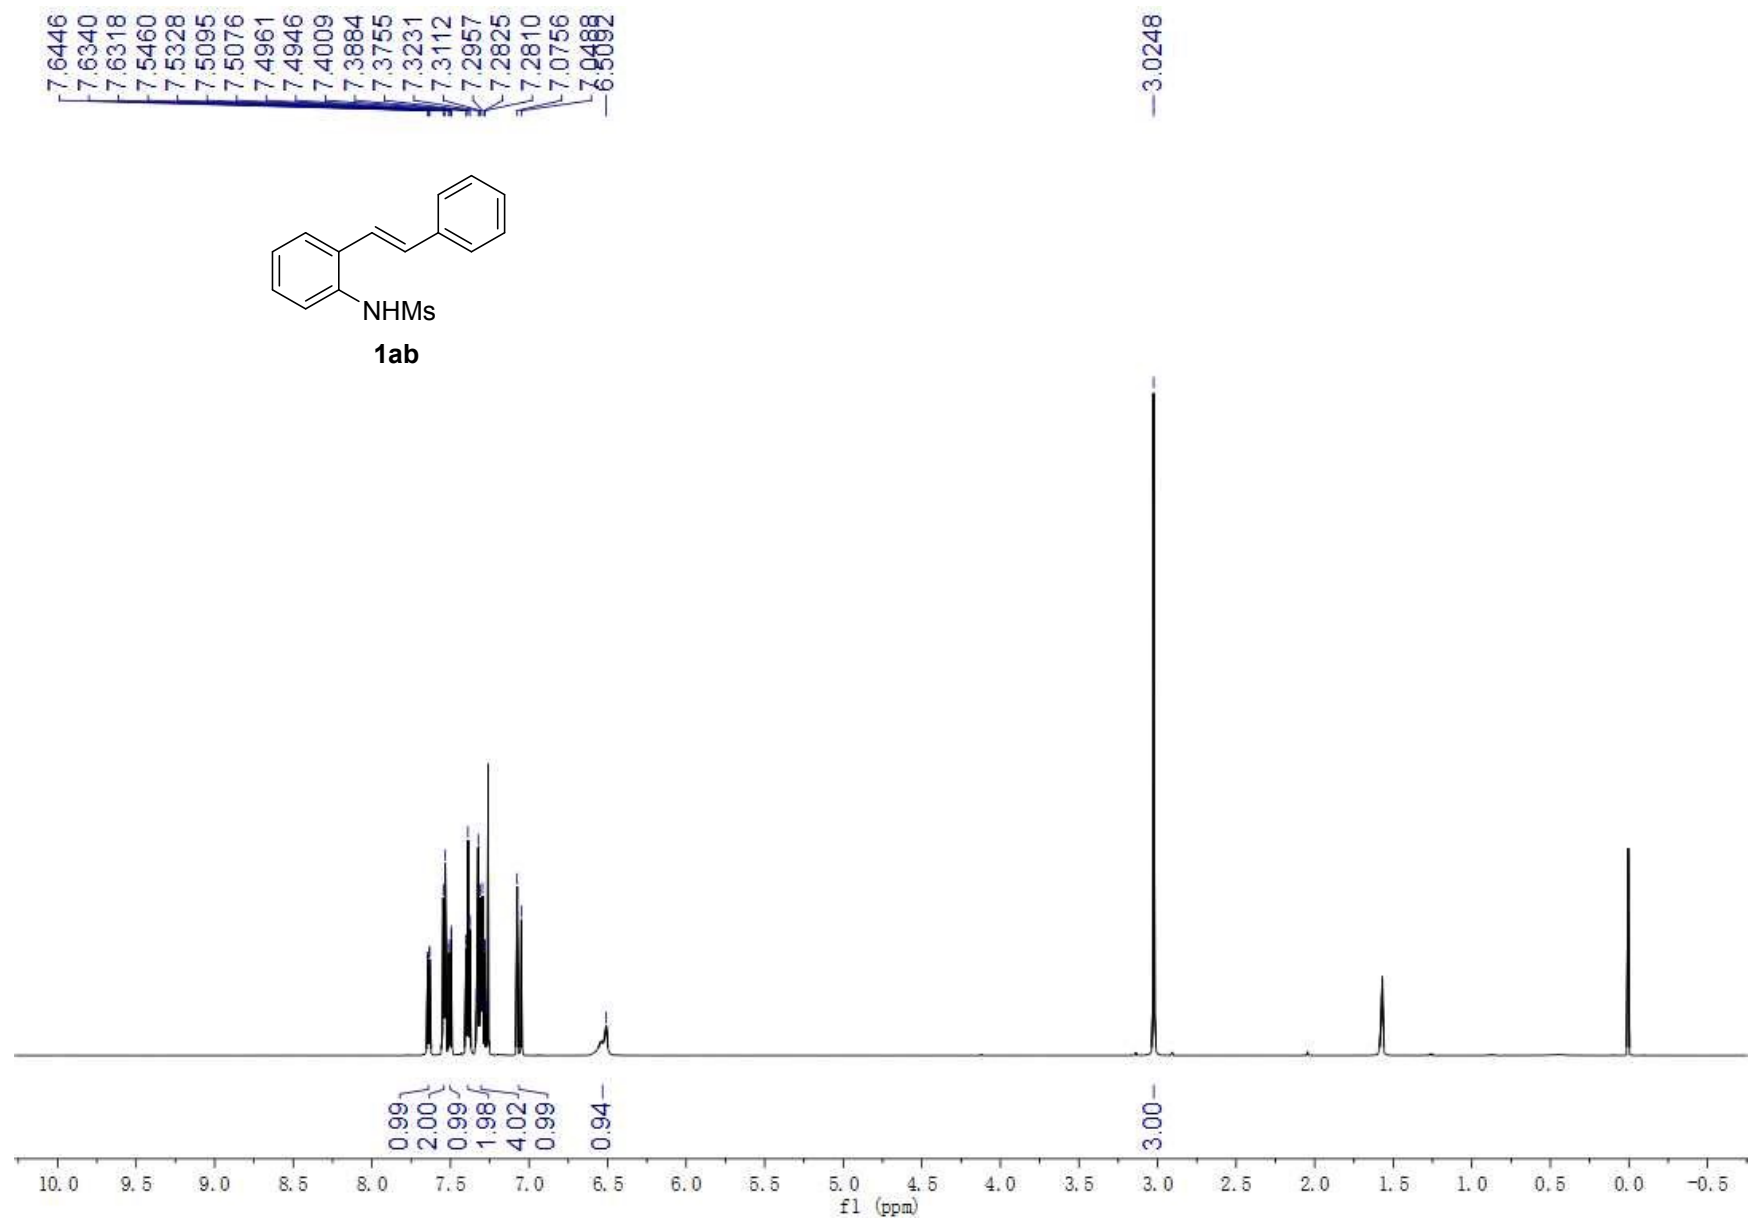

136.7610  
133.4935  
132.9165  
132.5286  
128.8428  
128.7293  
128.3400  
127.0104  
126.9573  
126.8868  
125.1317  
122.7966

—39.9948

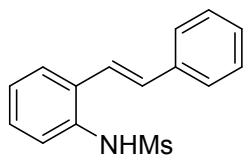

**1ab**

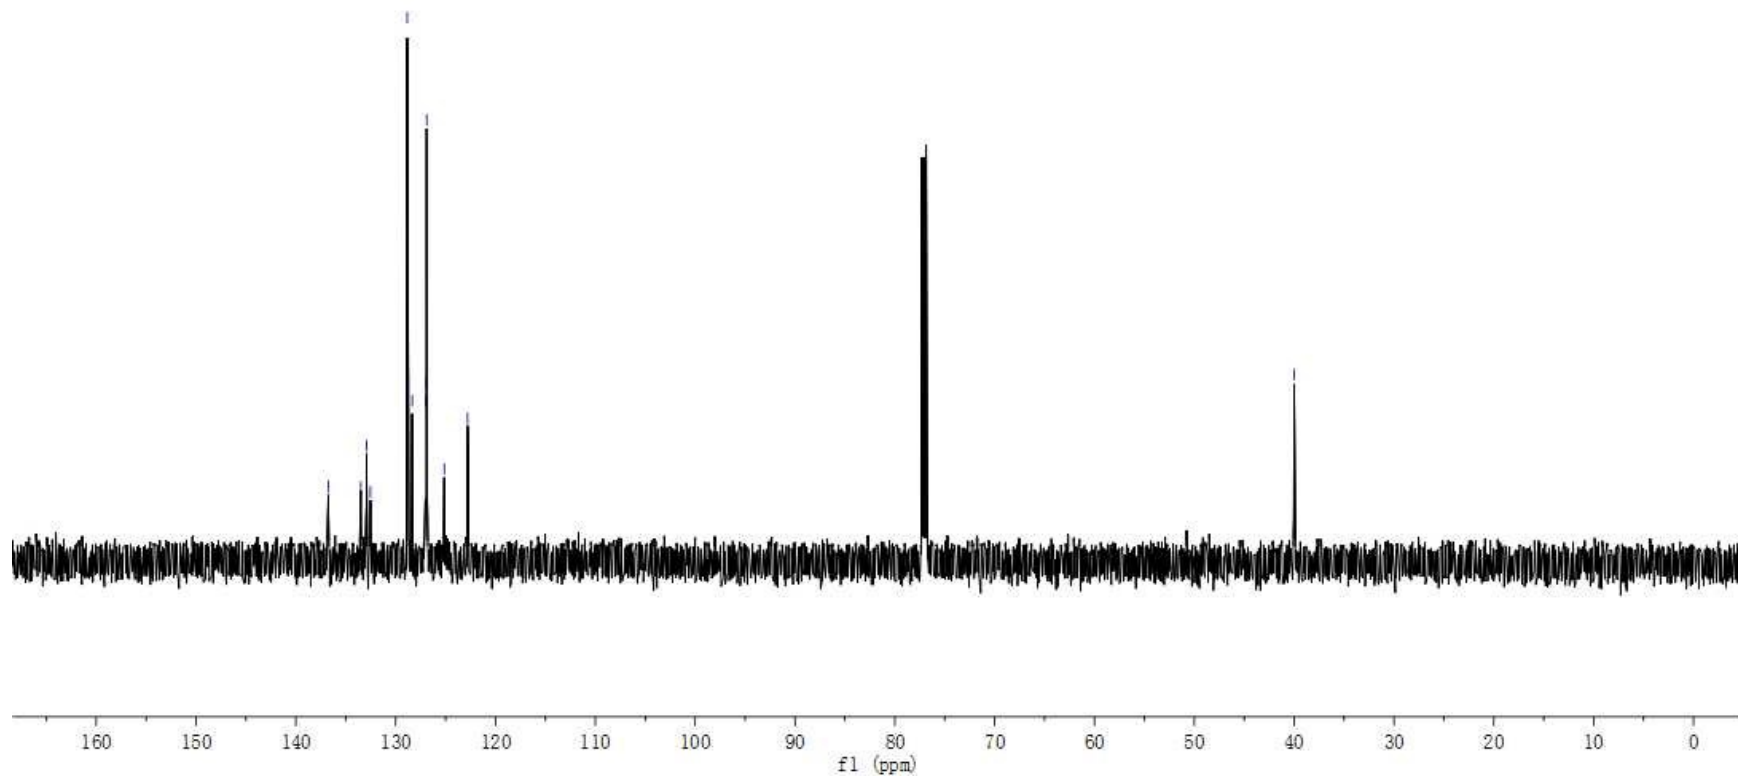

7.6339  
7.6297  
7.6265  
7.6185  
7.6152  
7.6112  
7.5020  
7.4960  
7.4898  
7.4865  
7.4805  
7.4739  
7.3476  
7.3419  
7.3383  
7.3337  
7.3301  
7.3247  
7.3158  
7.2862  
7.2817  
7.2784  
7.2706  
7.2673  
7.2631  
7.2465  
7.2407  
7.2366  
7.2308  
7.2243  
6.8901  
6.8633  
6.8222  
6.7663  
6.7395

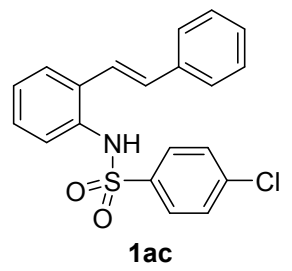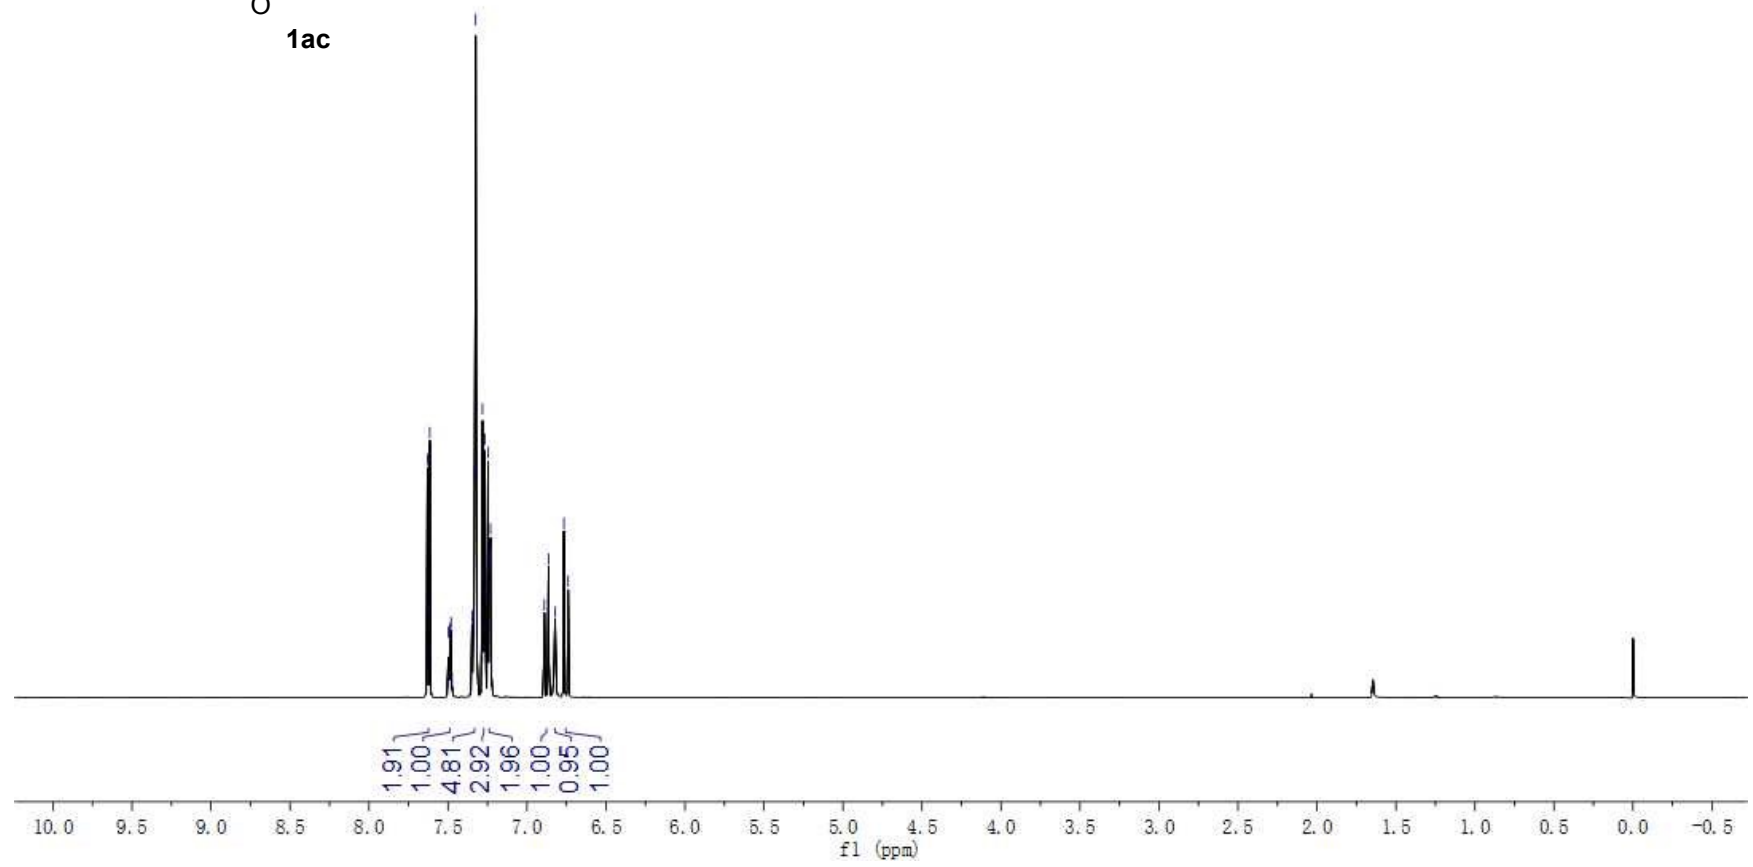



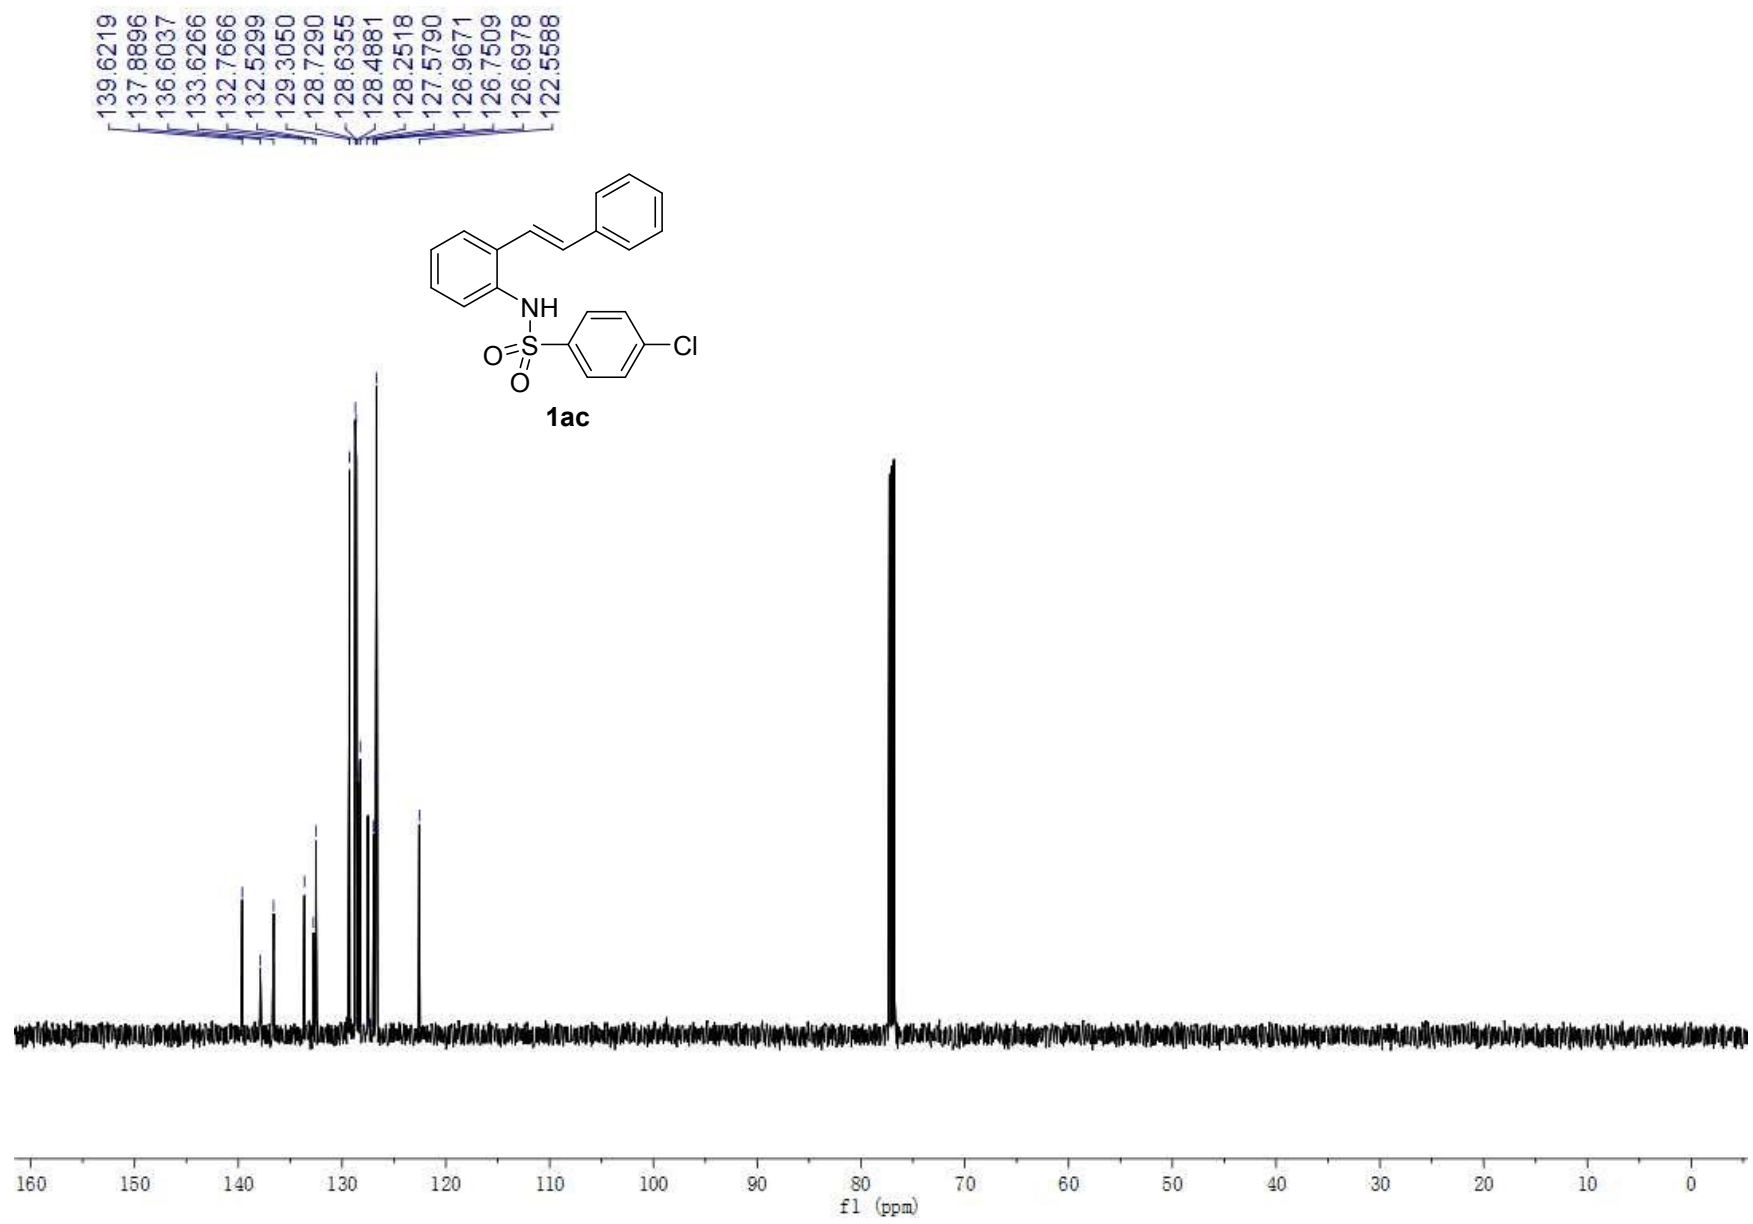

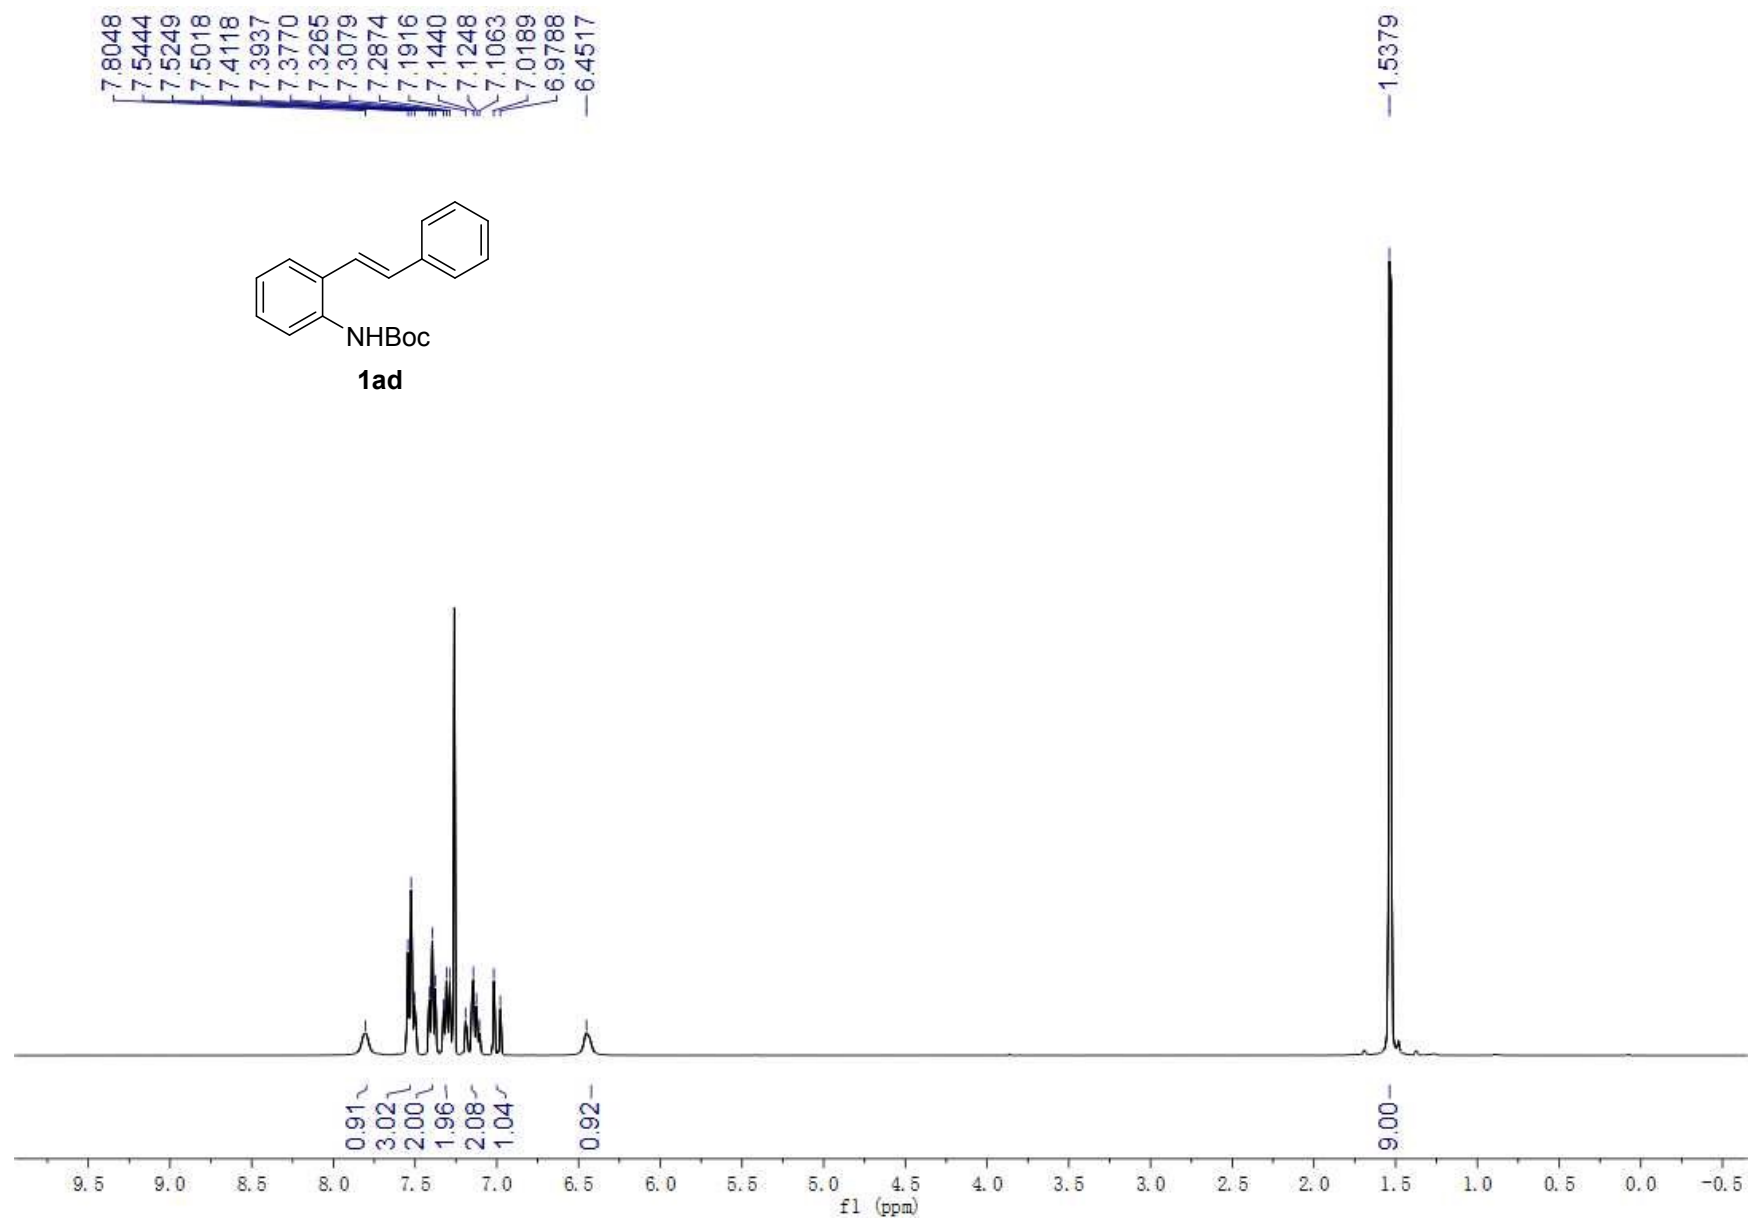

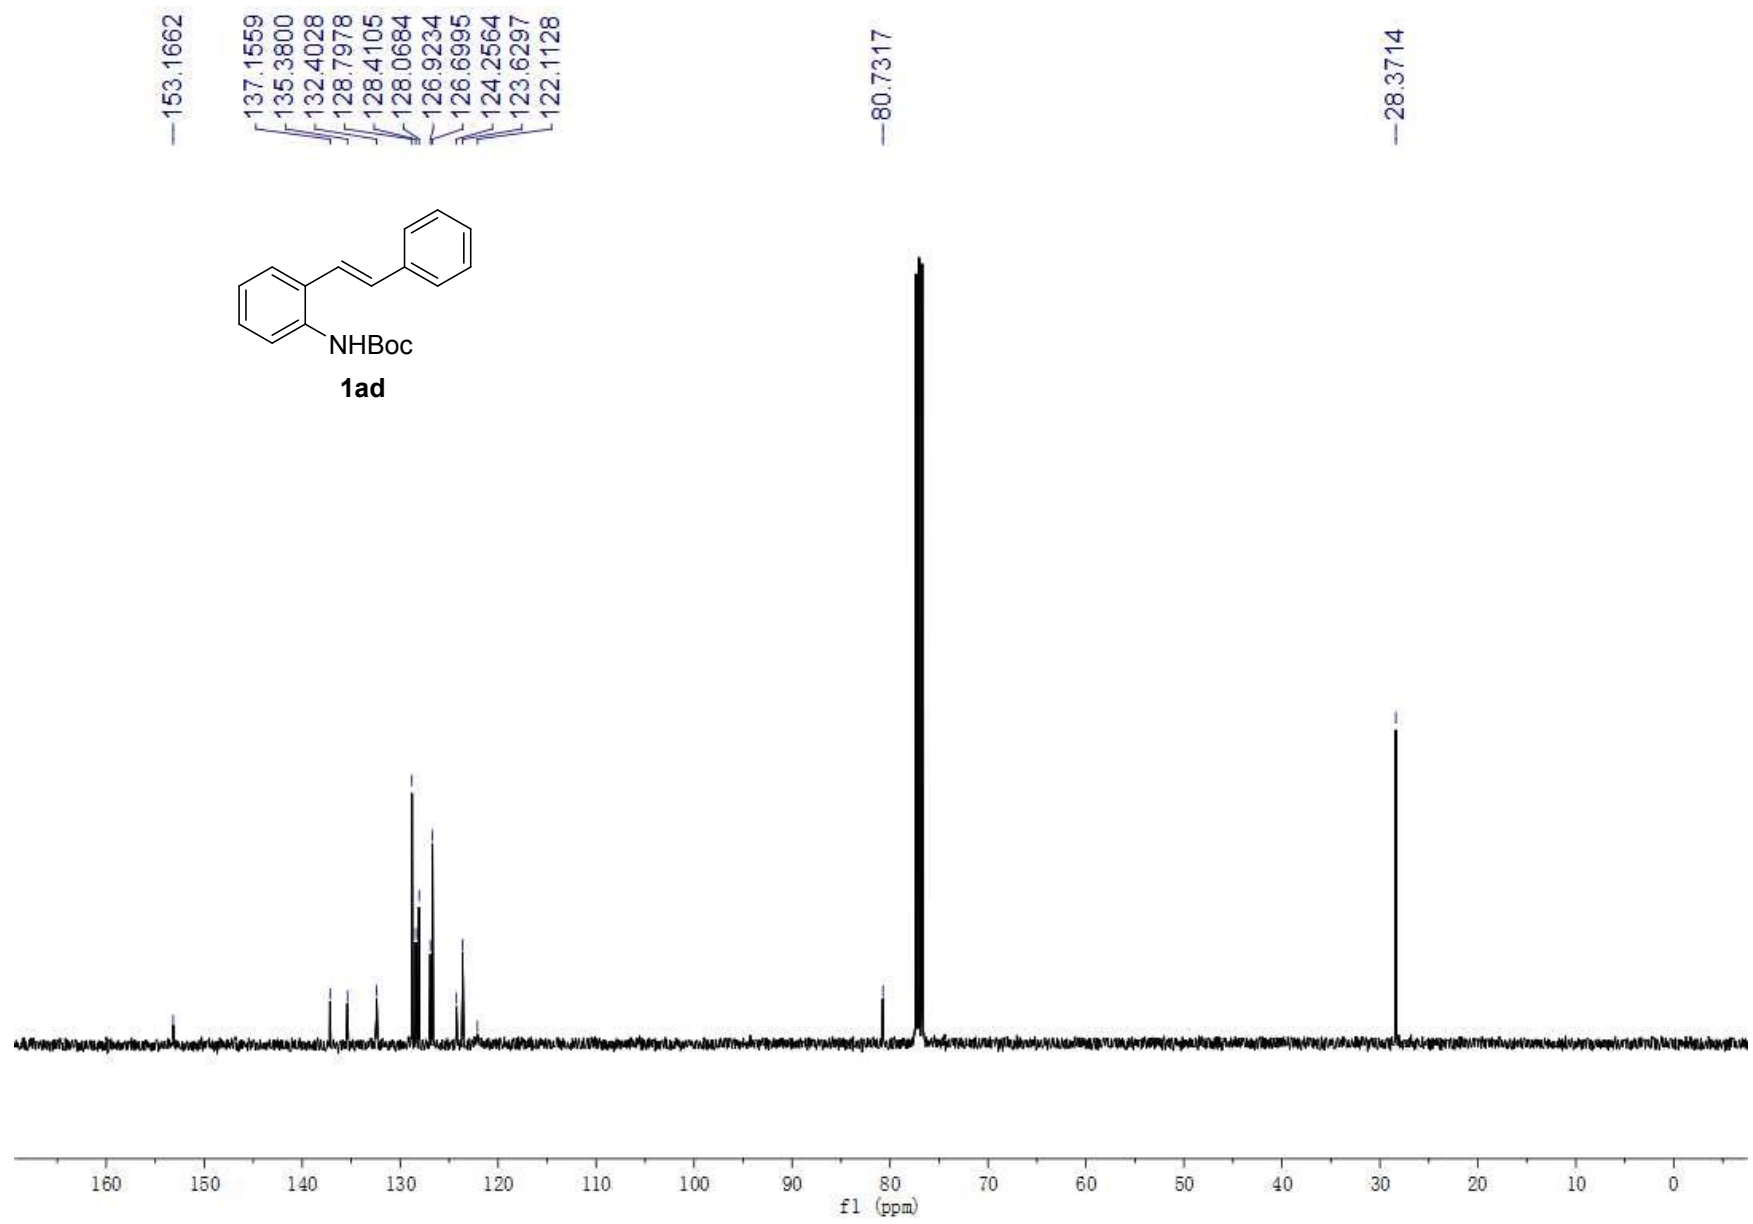

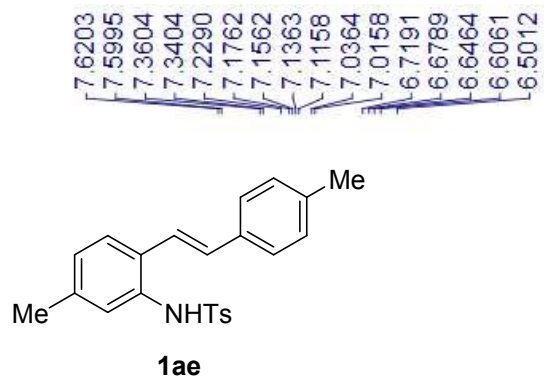

2.3626  
 2.3317  
 2.2927

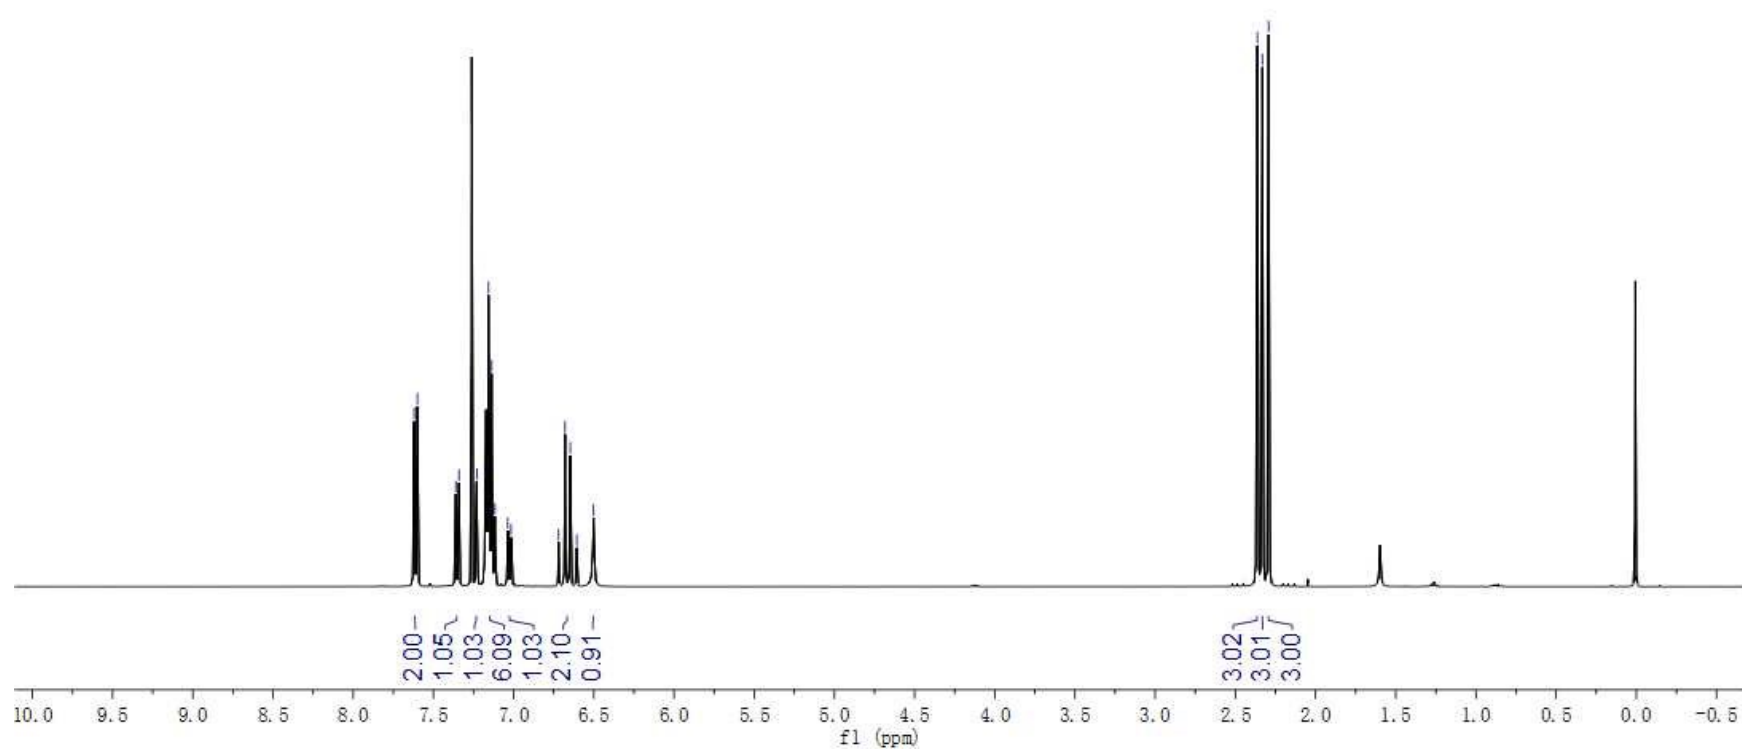

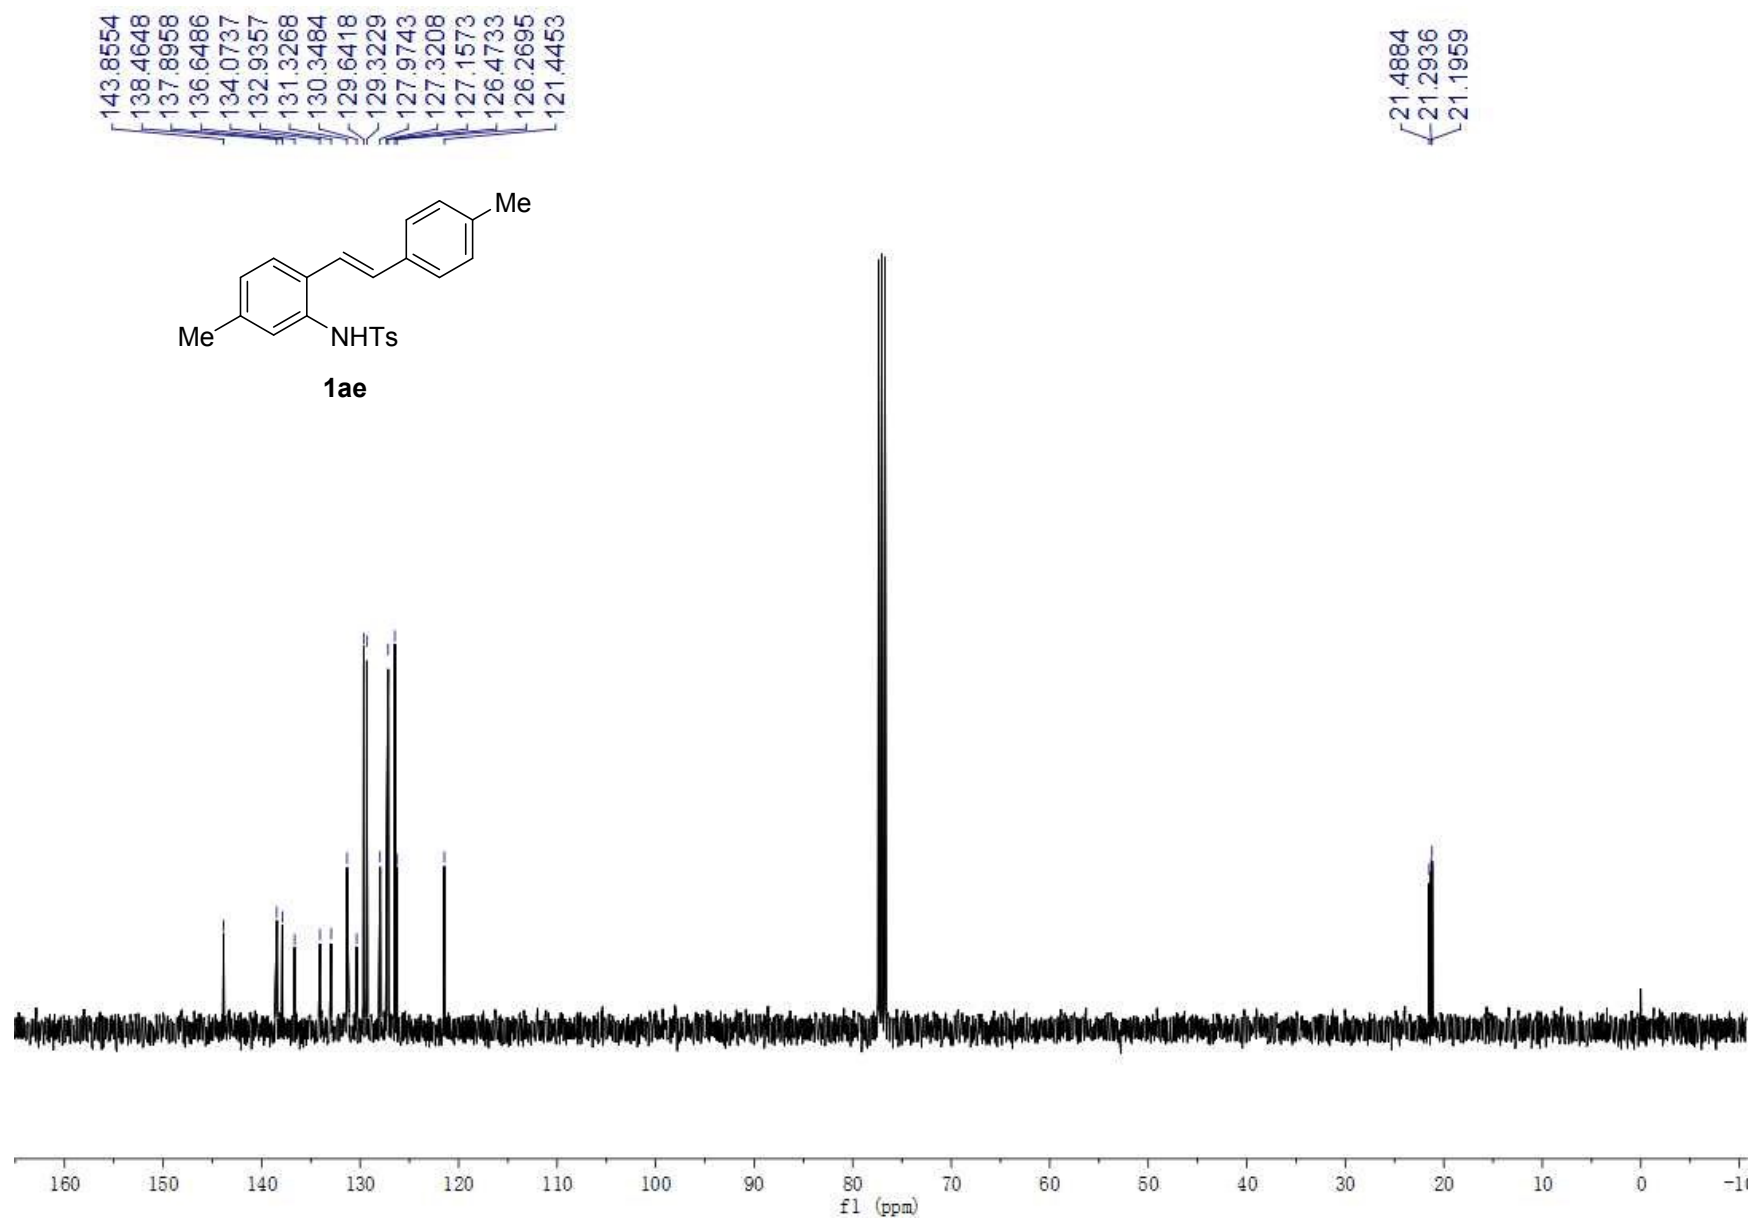

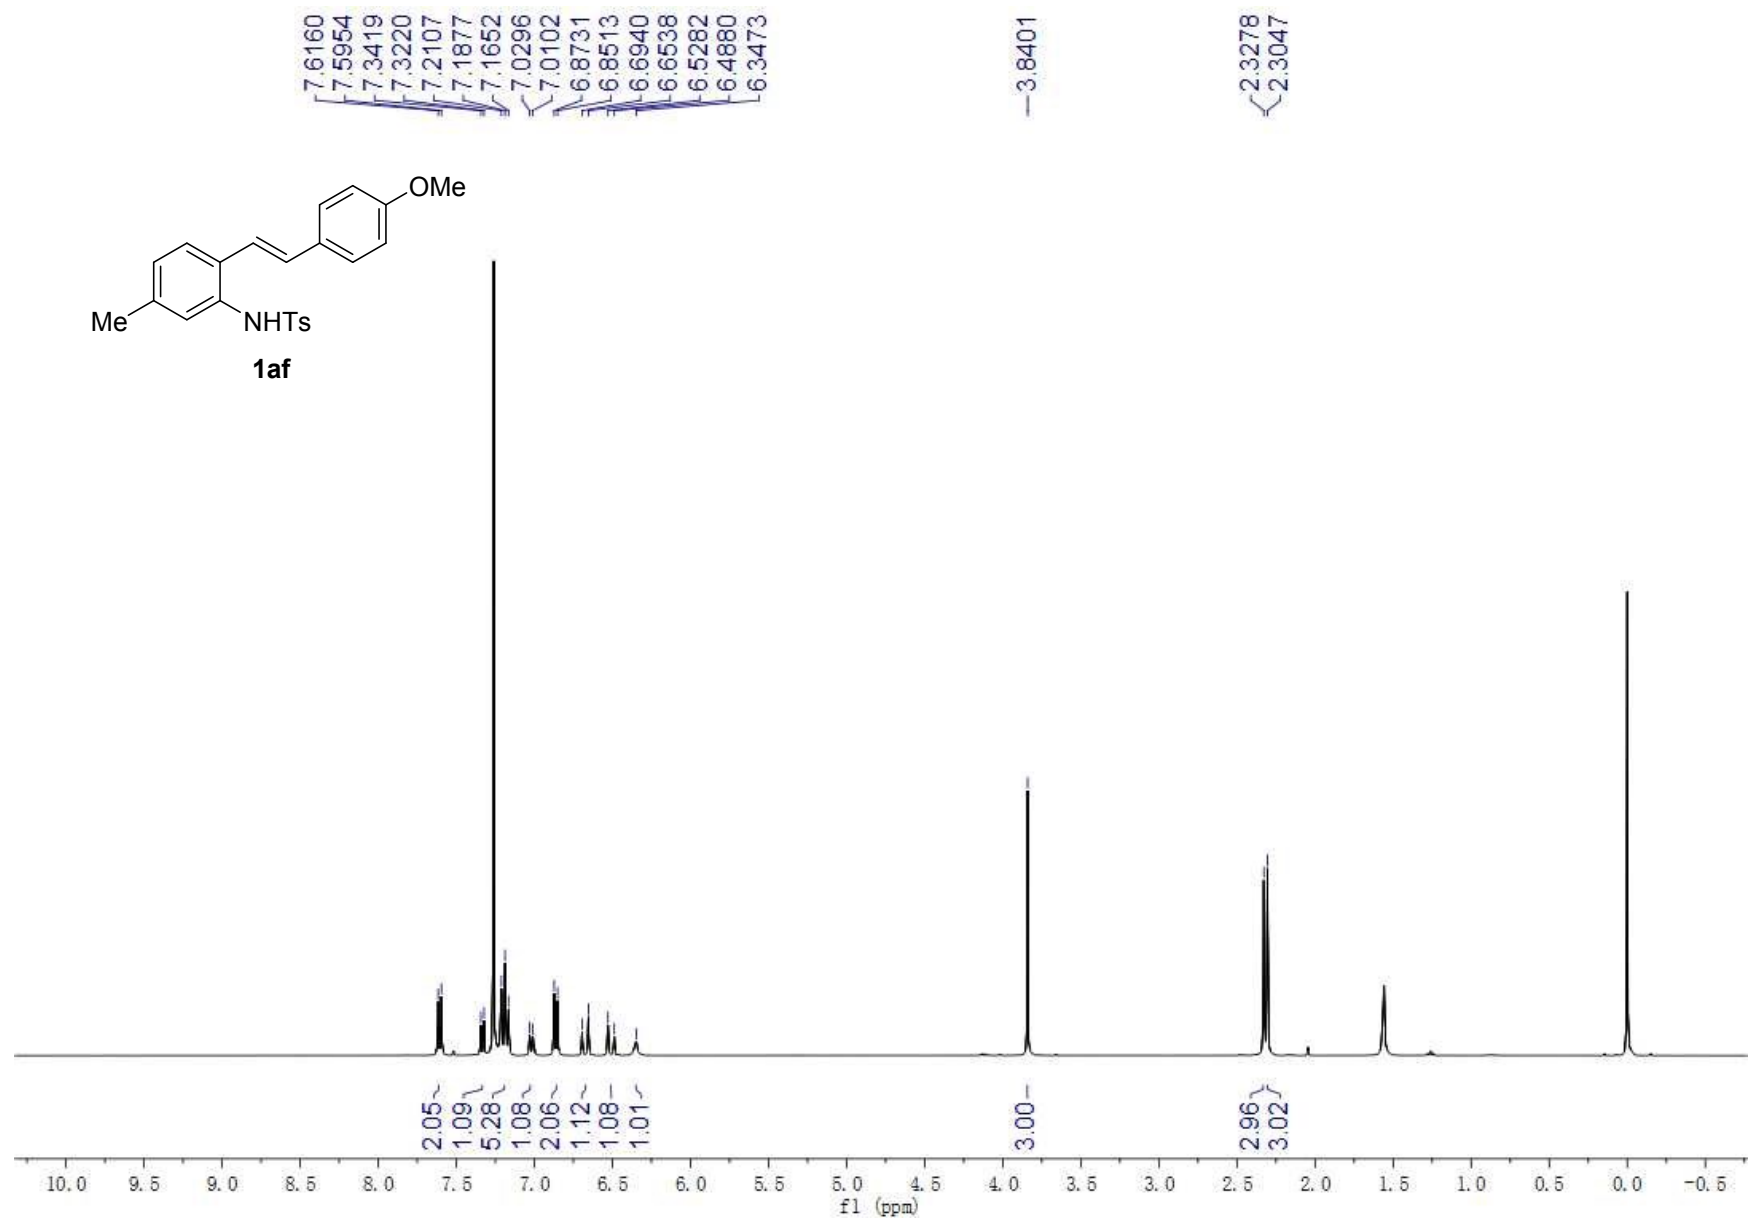

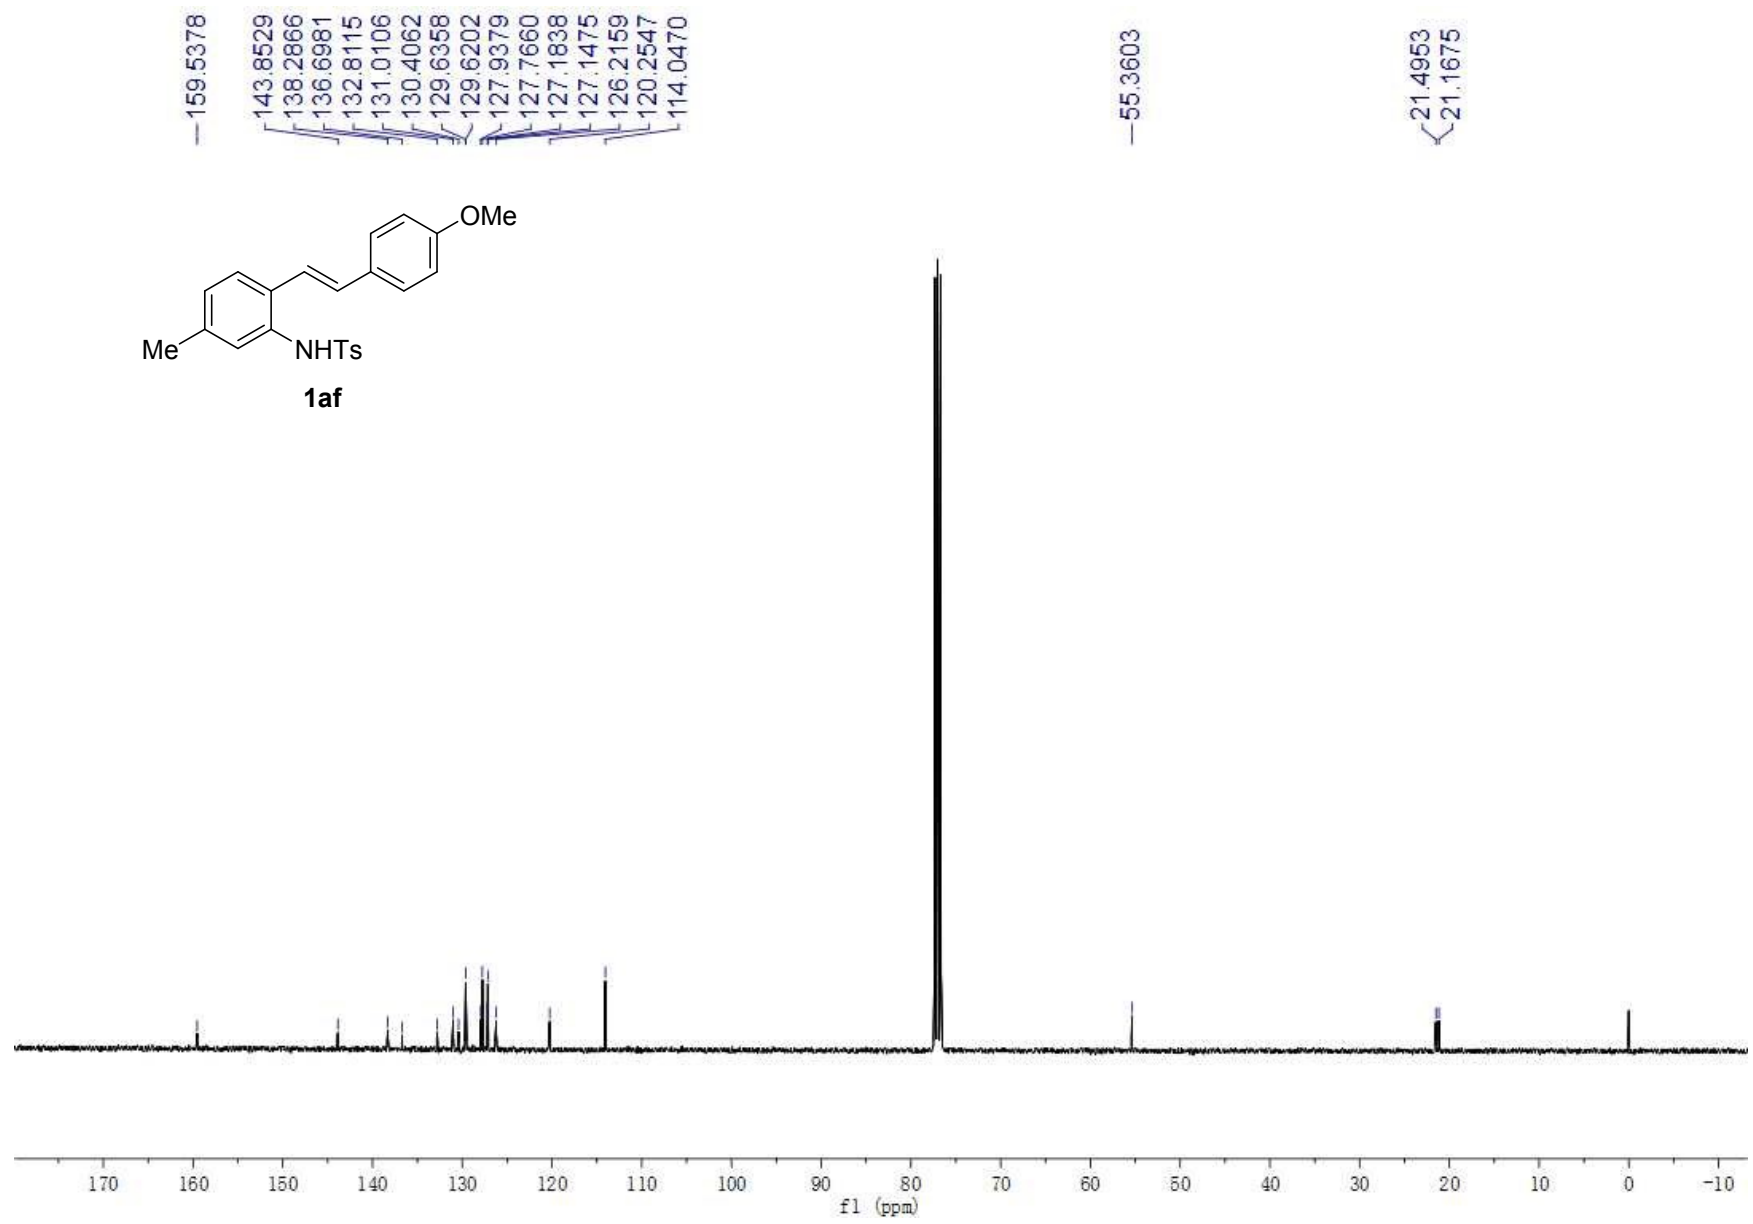

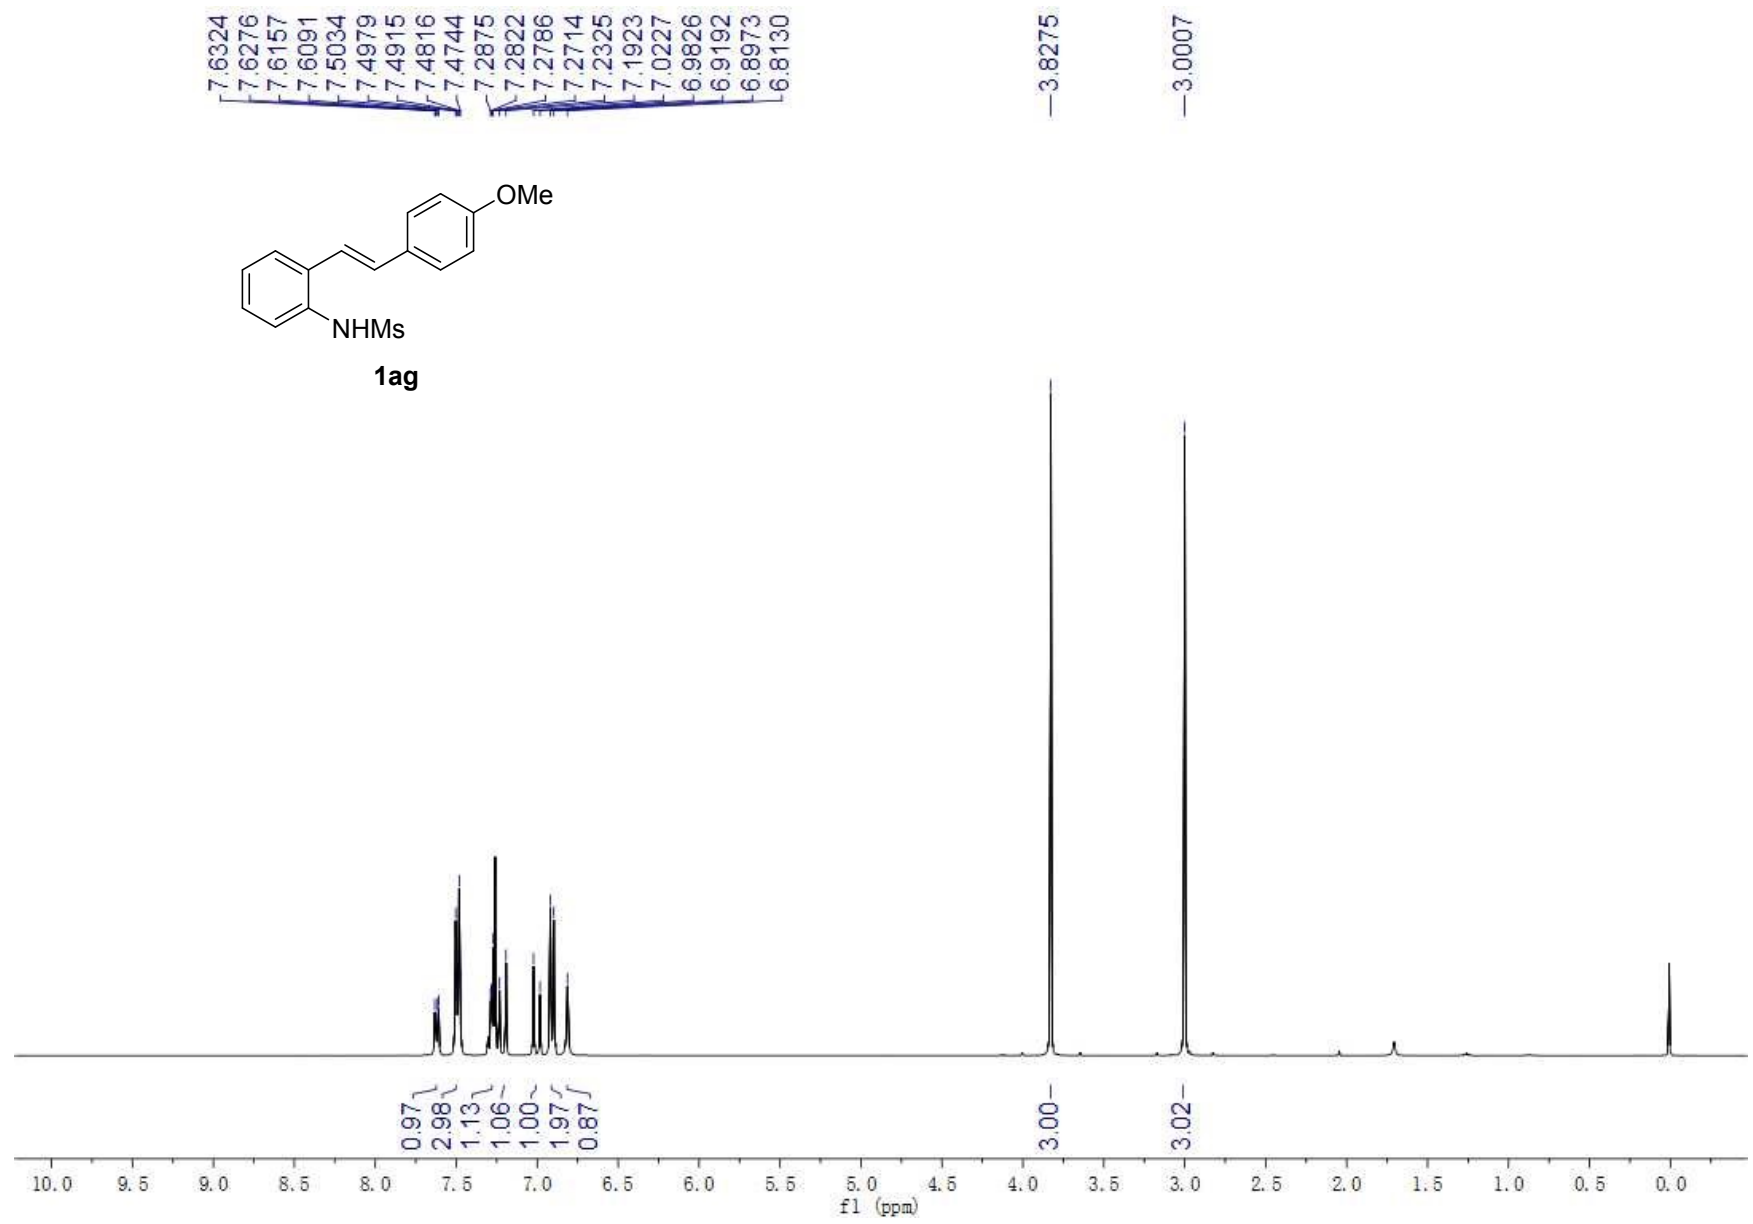



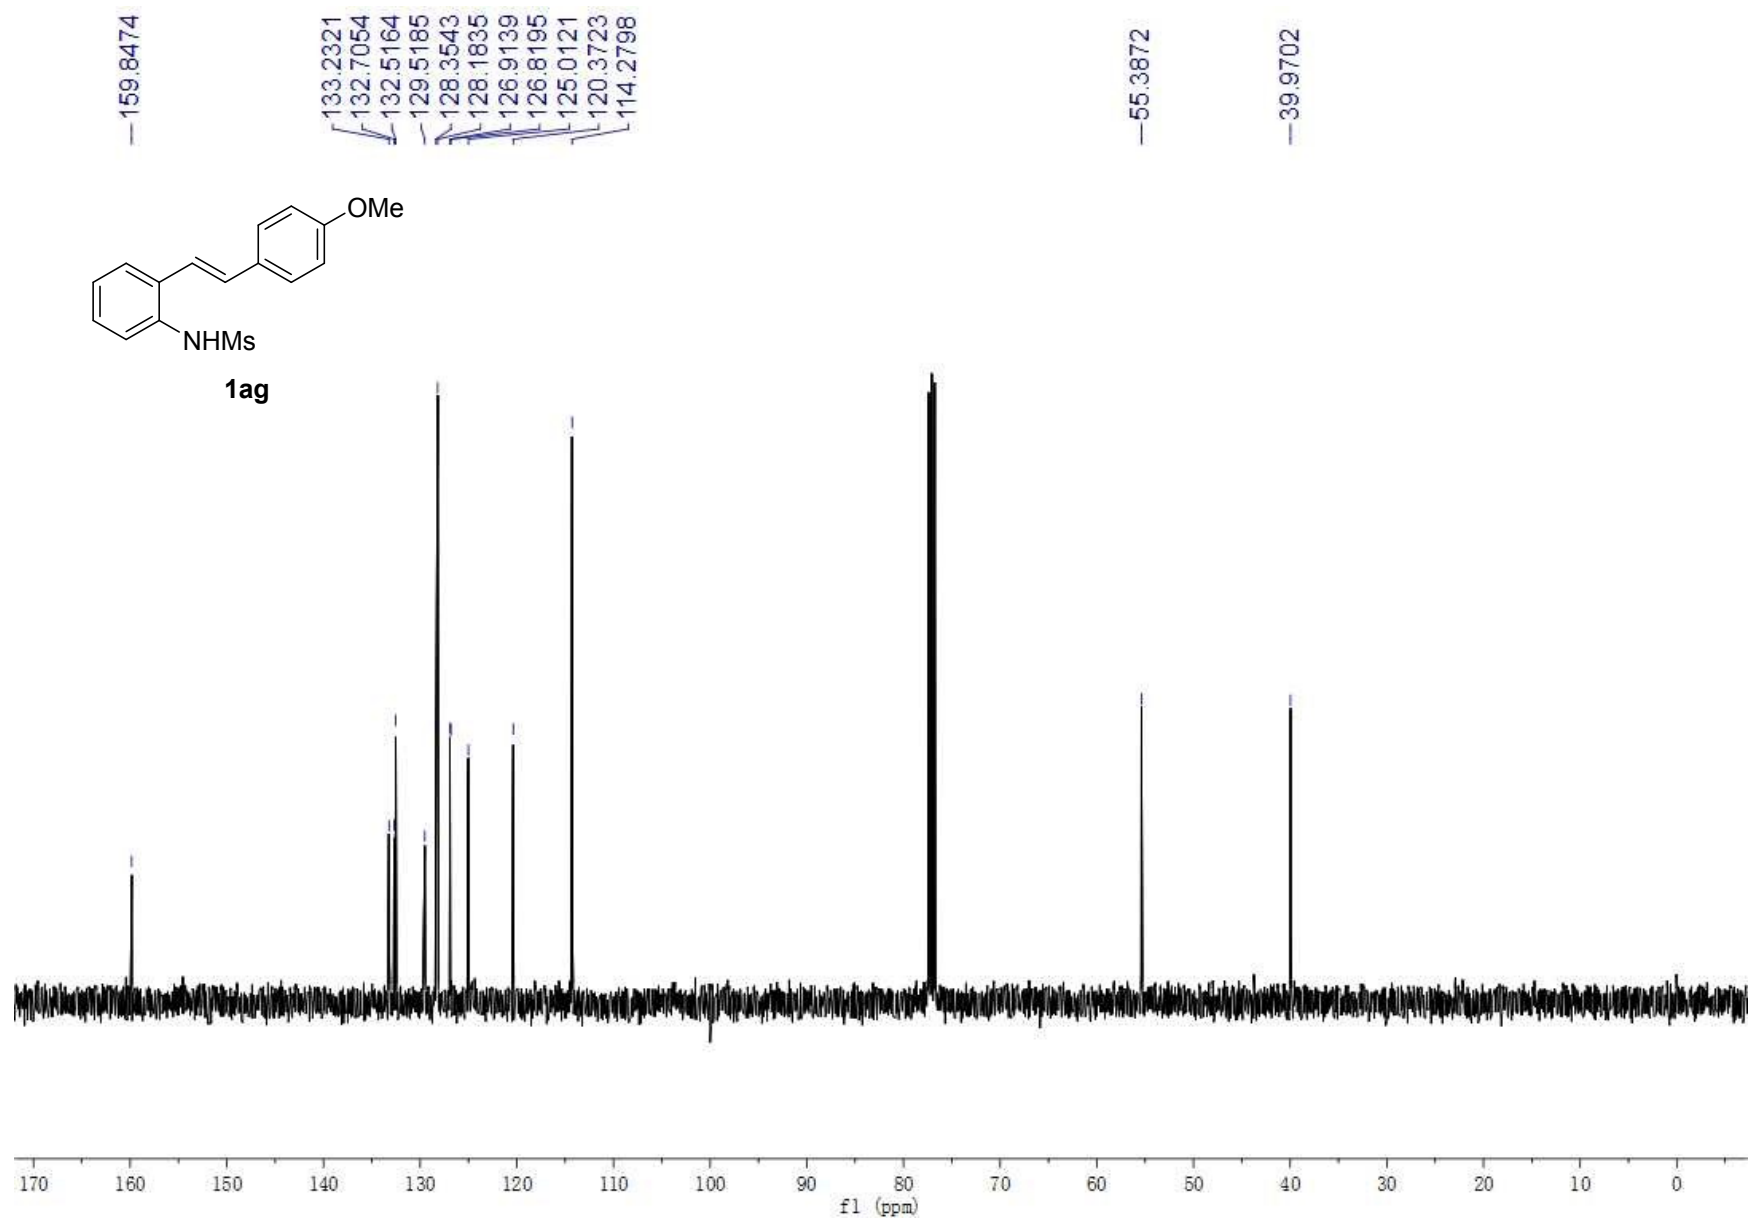

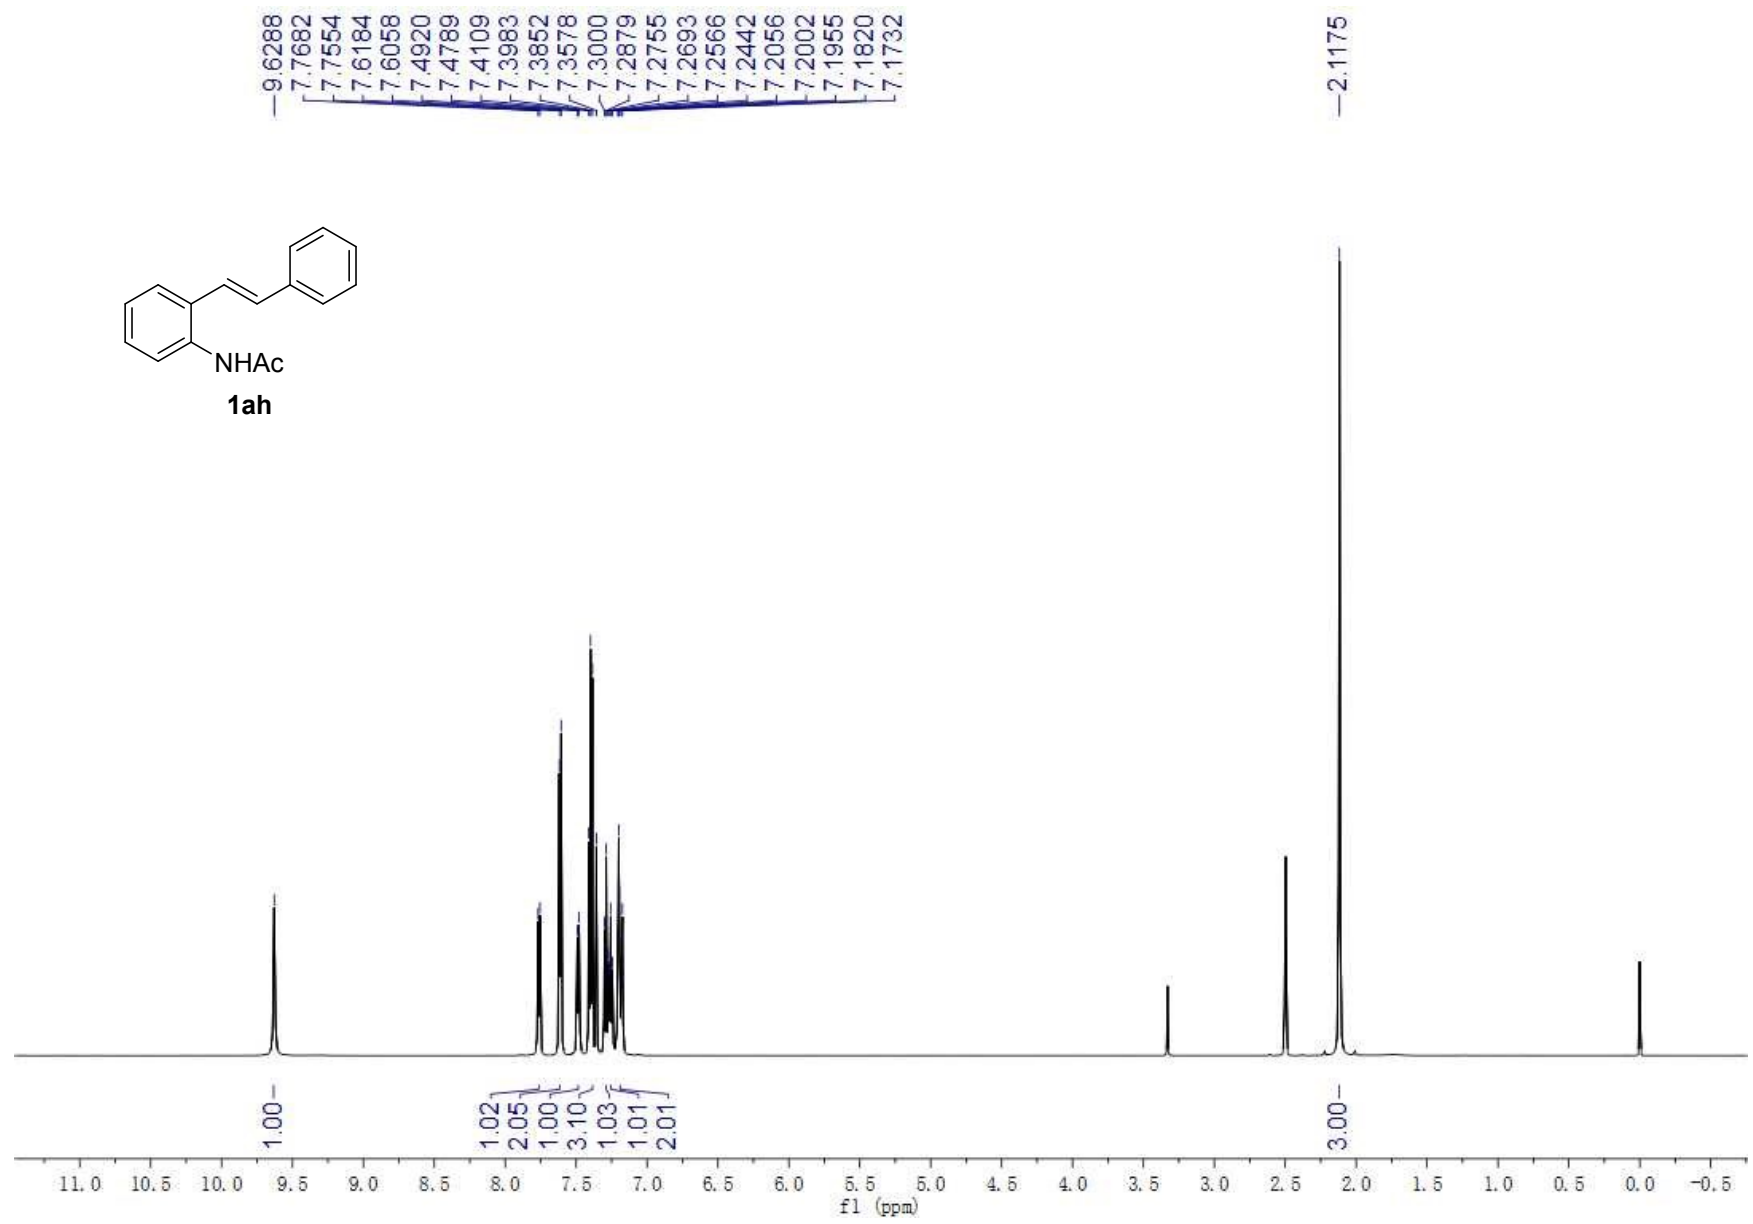

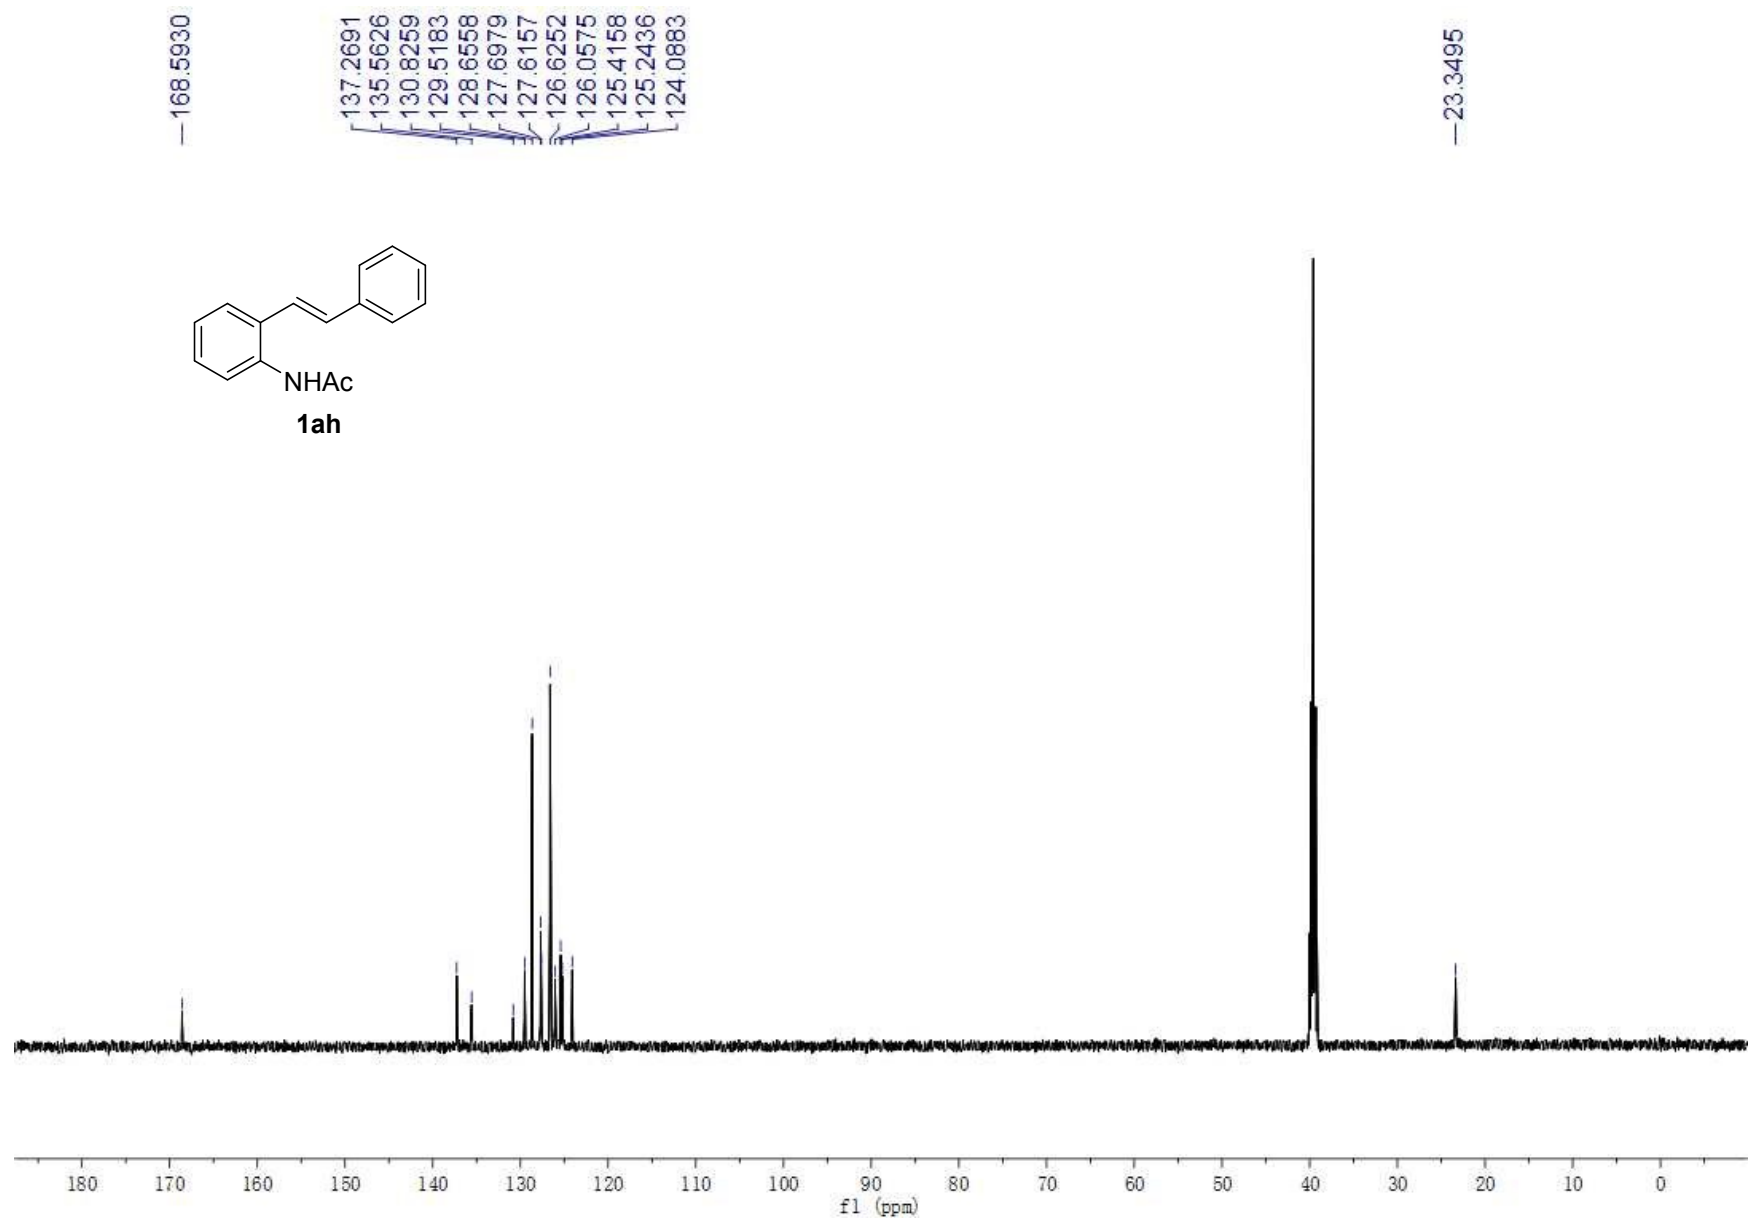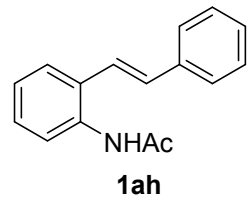

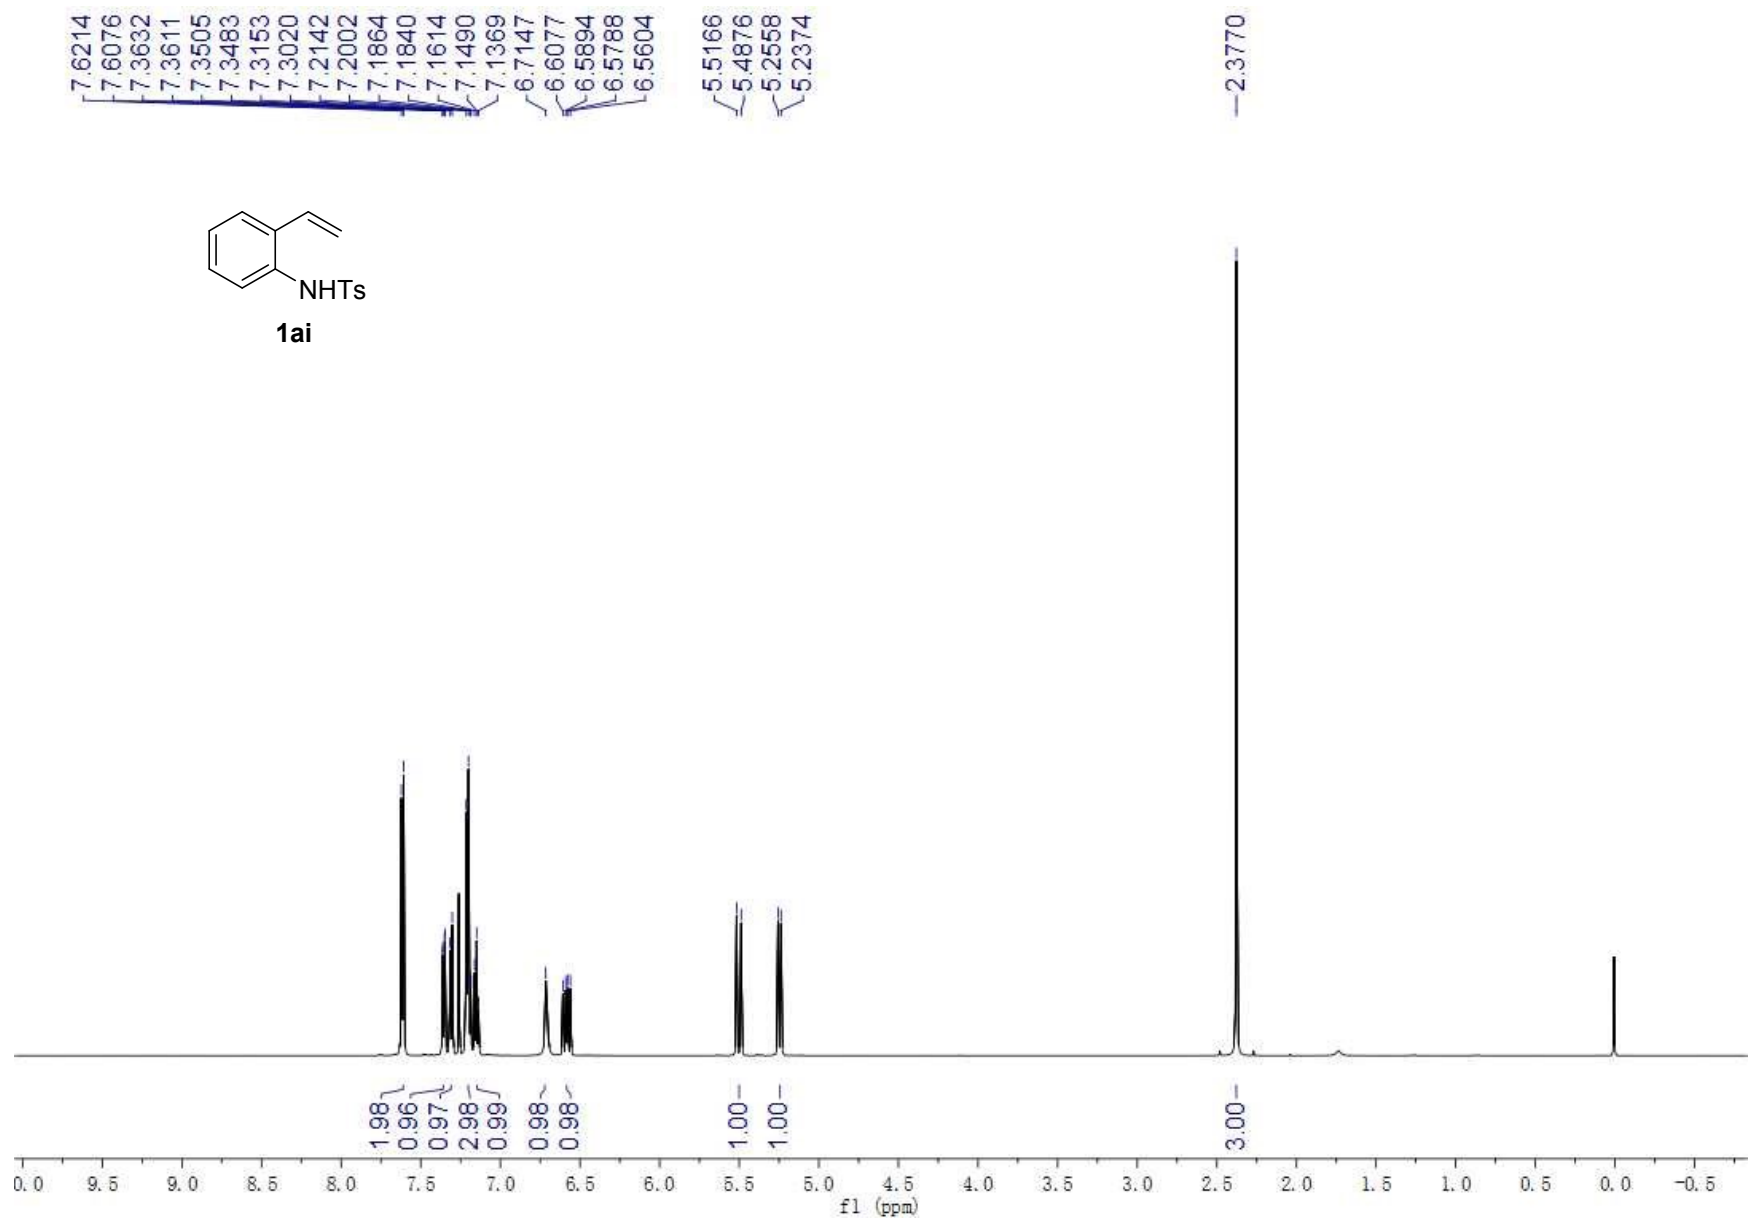

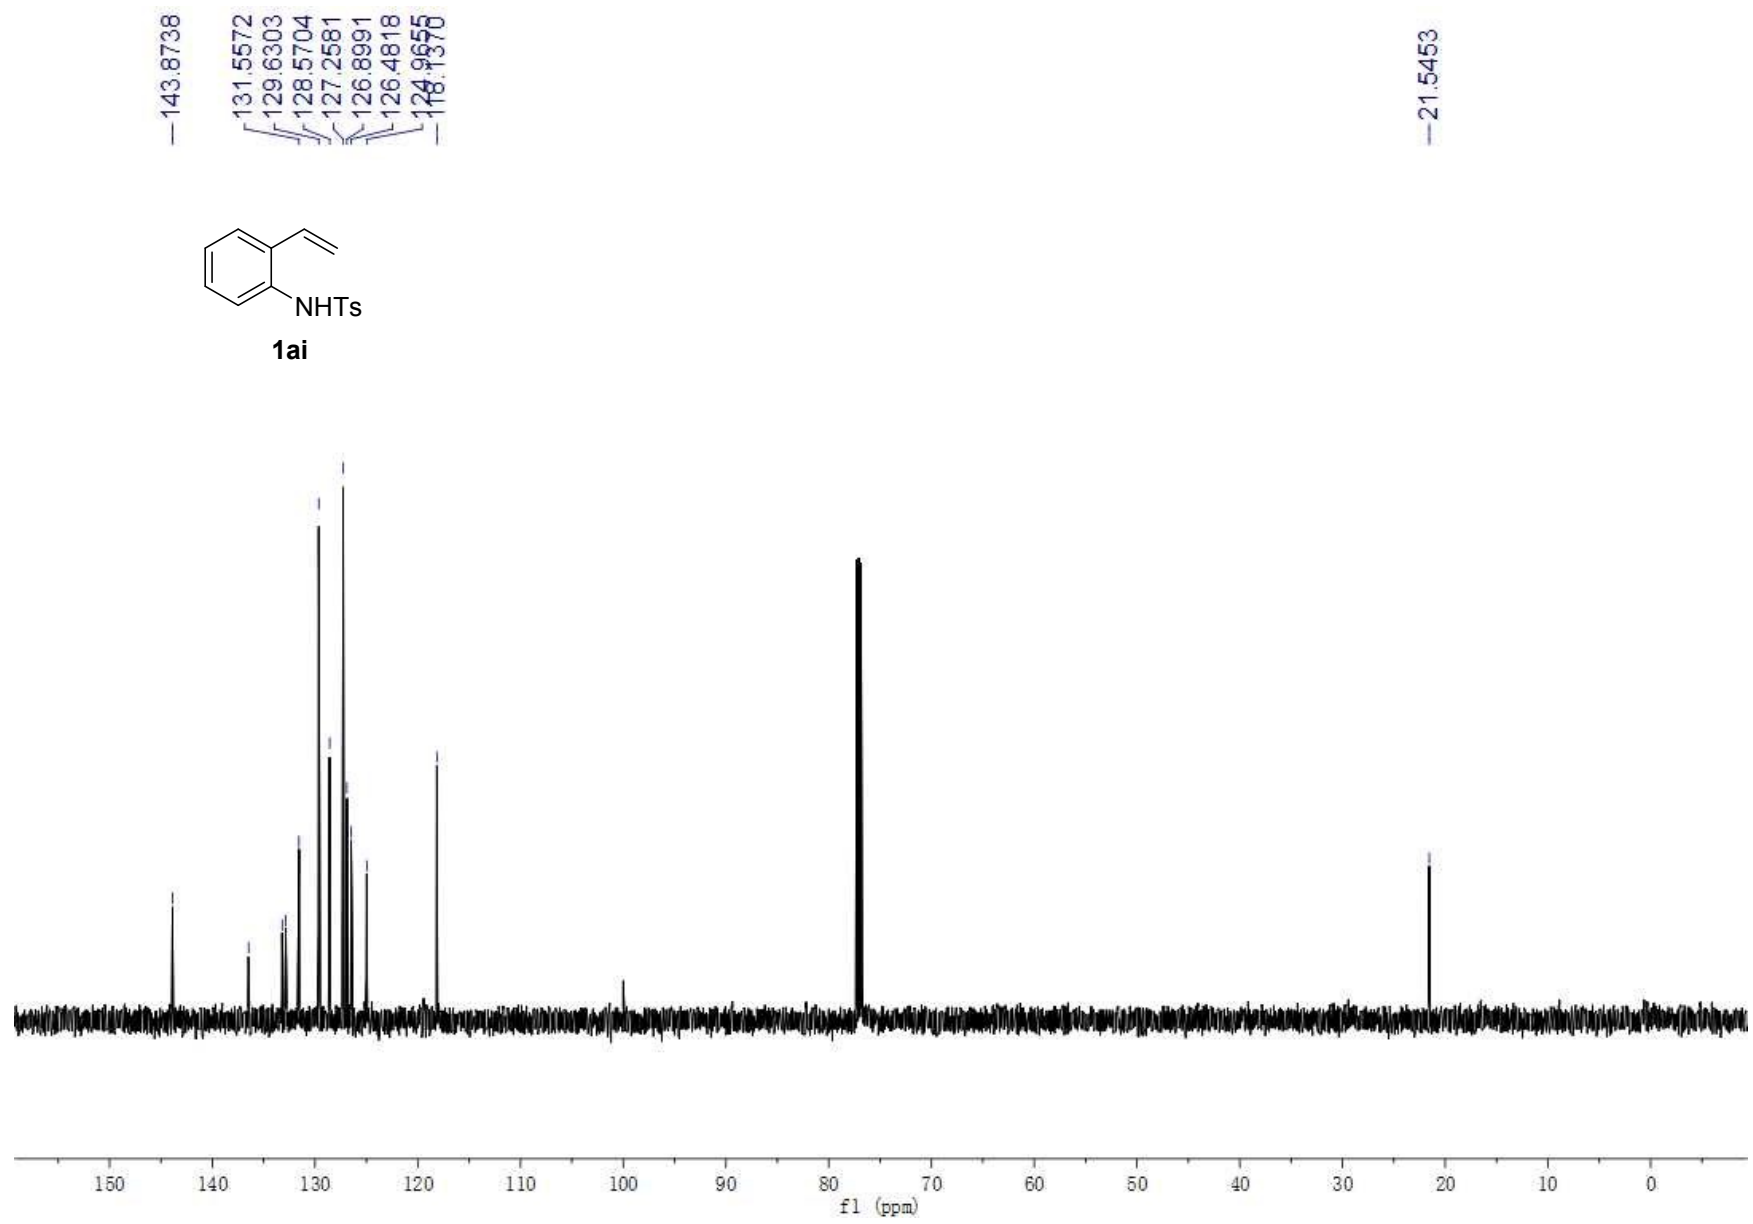

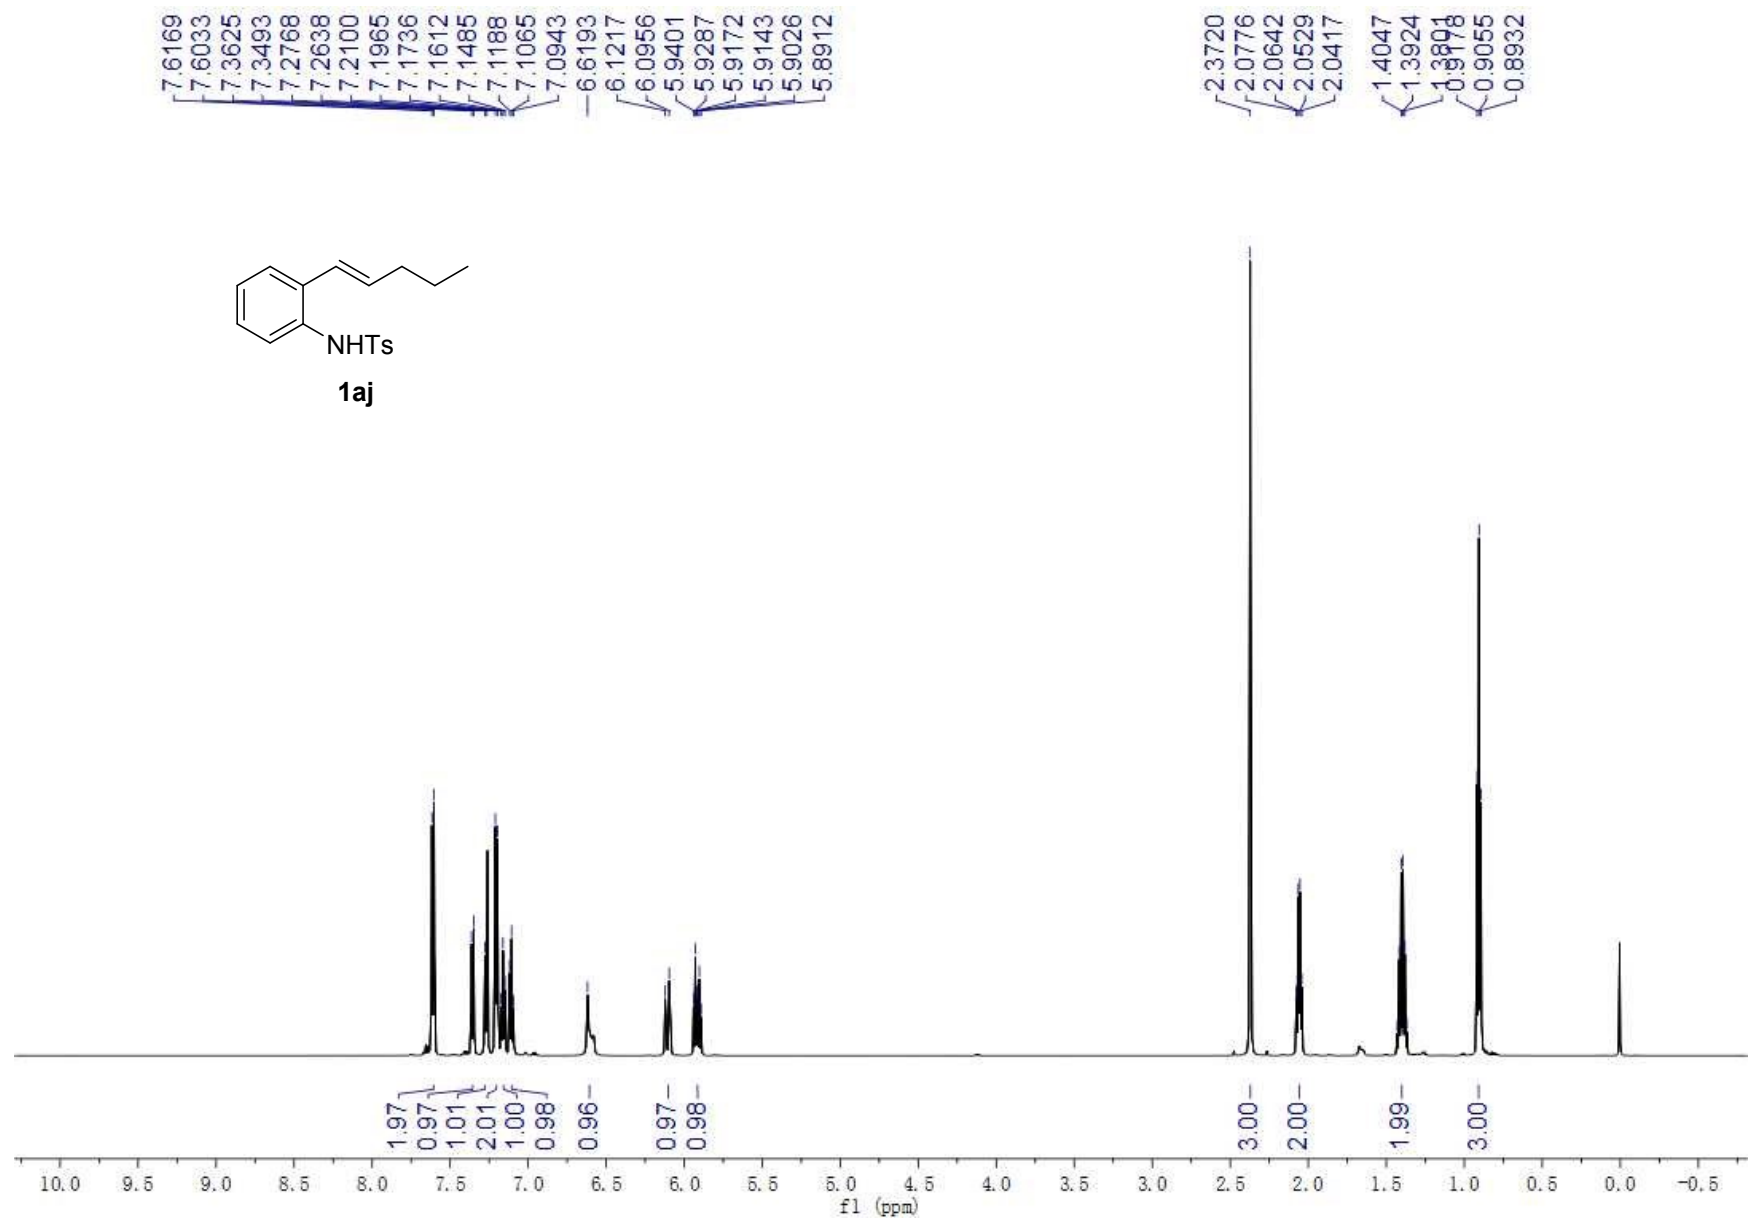

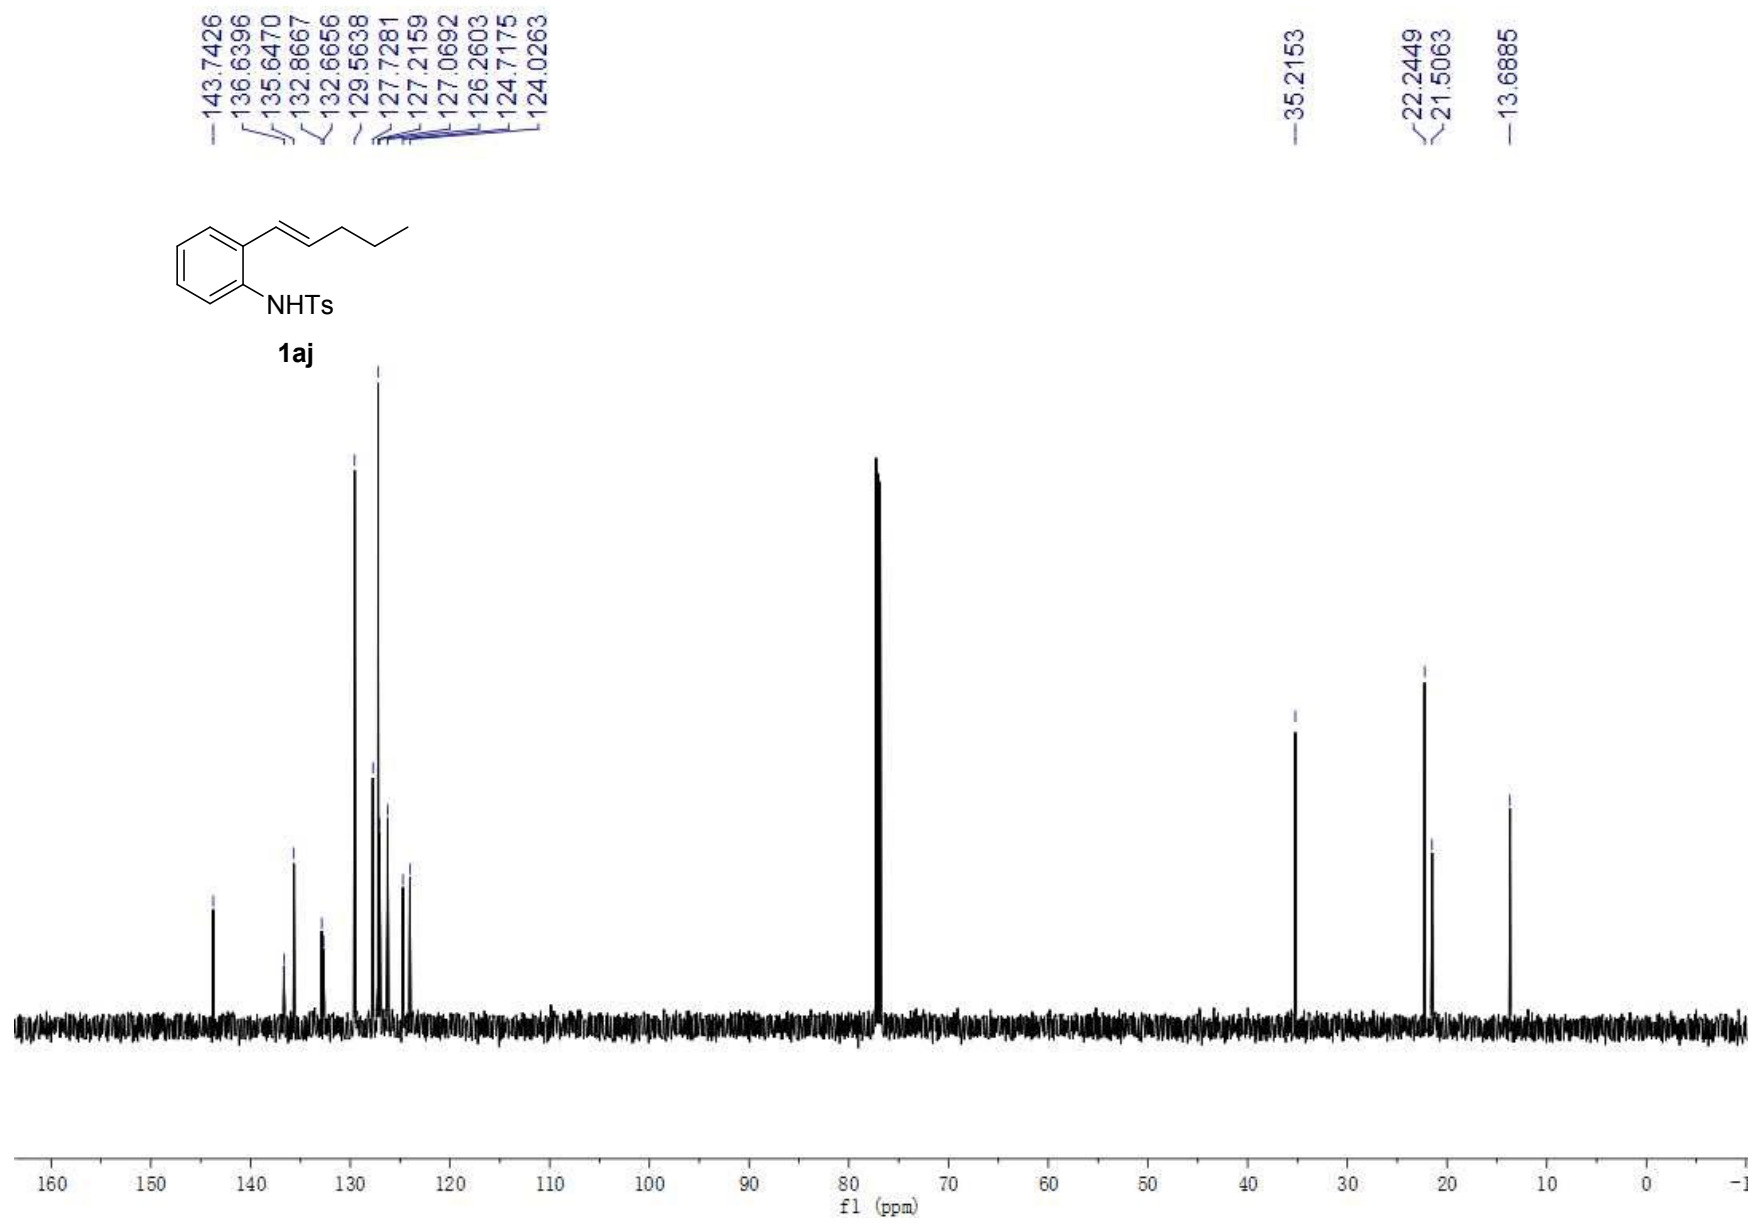

7.5978  
7.5841  
7.4201  
7.4068  
7.2997  
7.2881  
7.2844  
7.2736  
7.2321  
7.1697  
7.1562  
7.1449  
7.1405  
7.1349  
7.1335  
6.5892  
6.2896  
6.2631  
6.1170  
6.1064  
6.0958  
6.0905  
6.0799  
6.0693

3.2522  
3.2503  
3.2417  
3.2397  
-2.3637

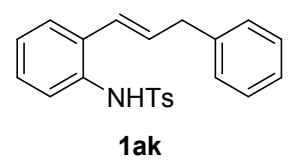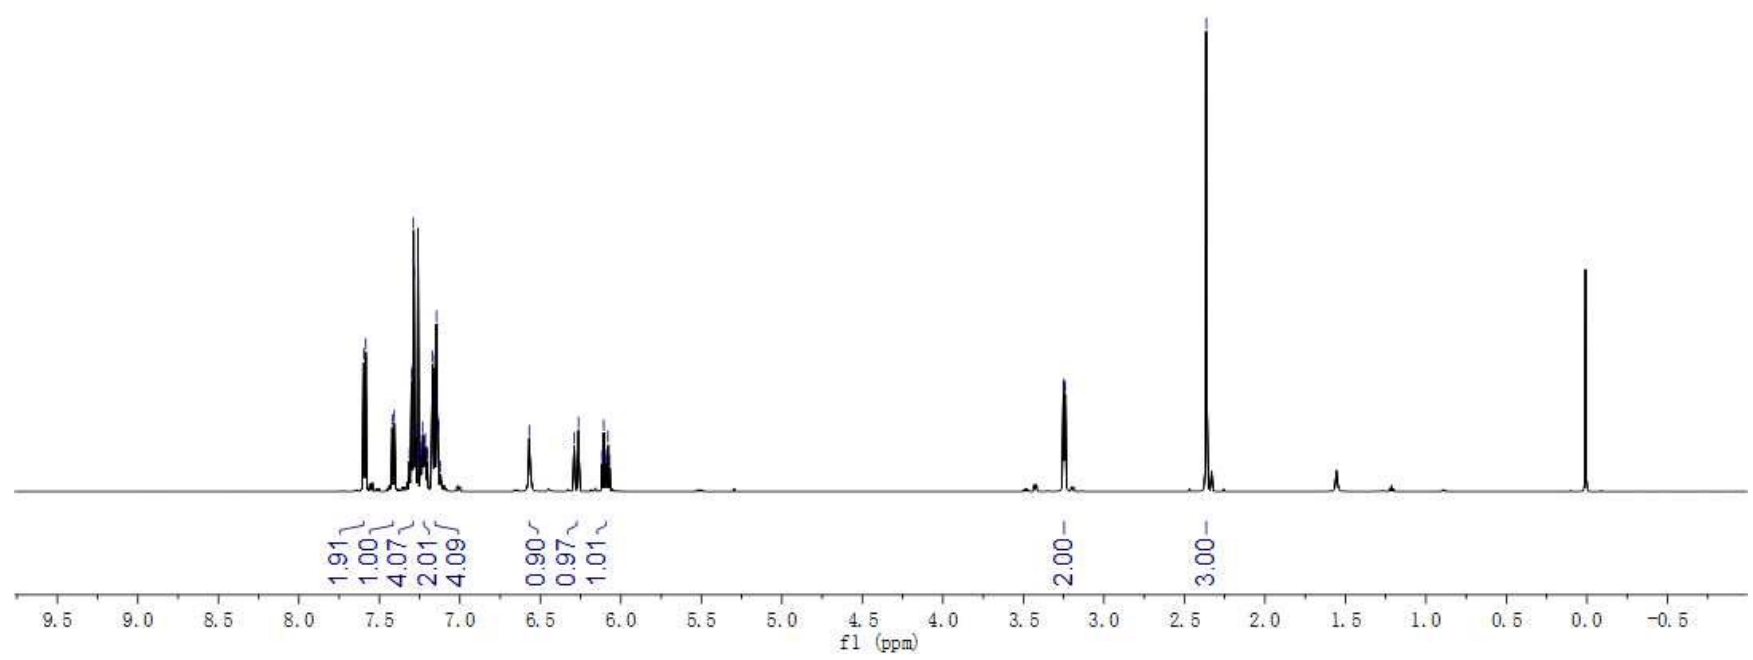



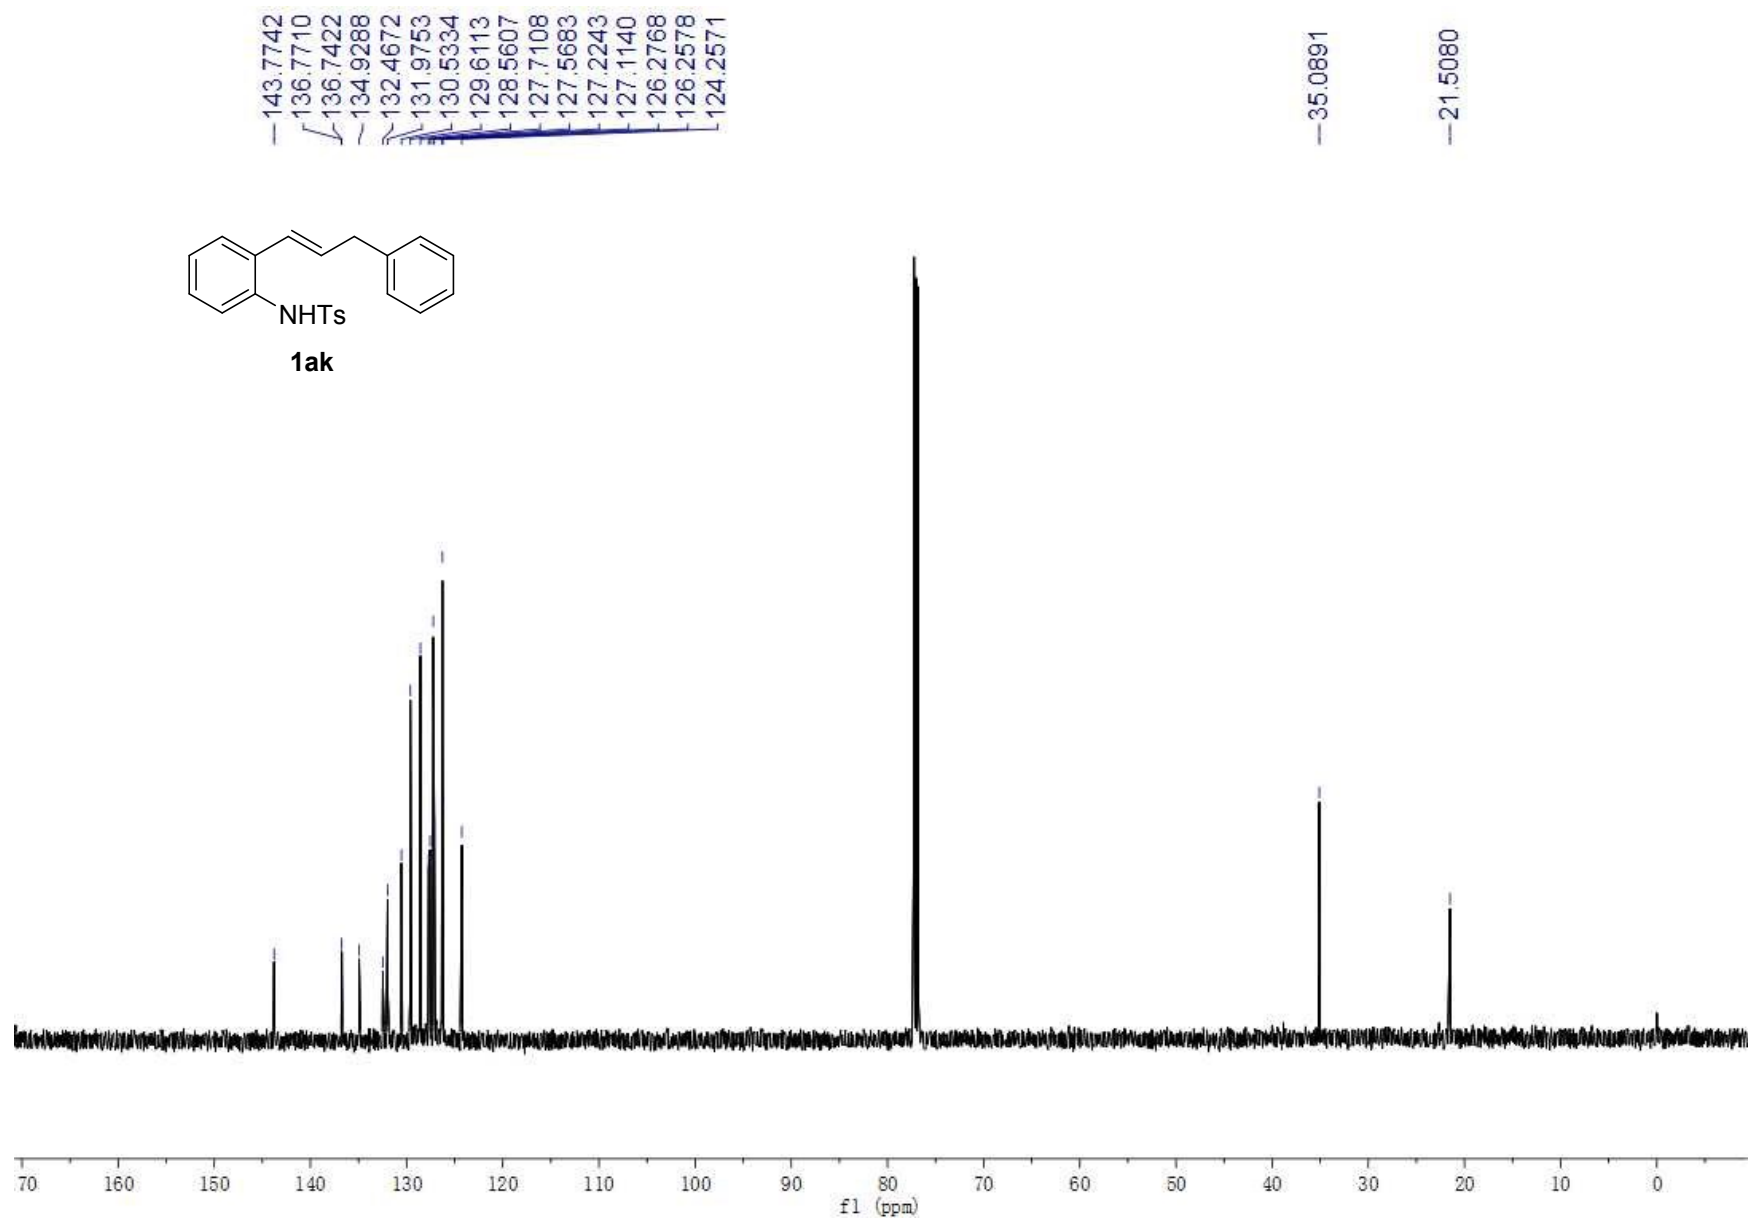

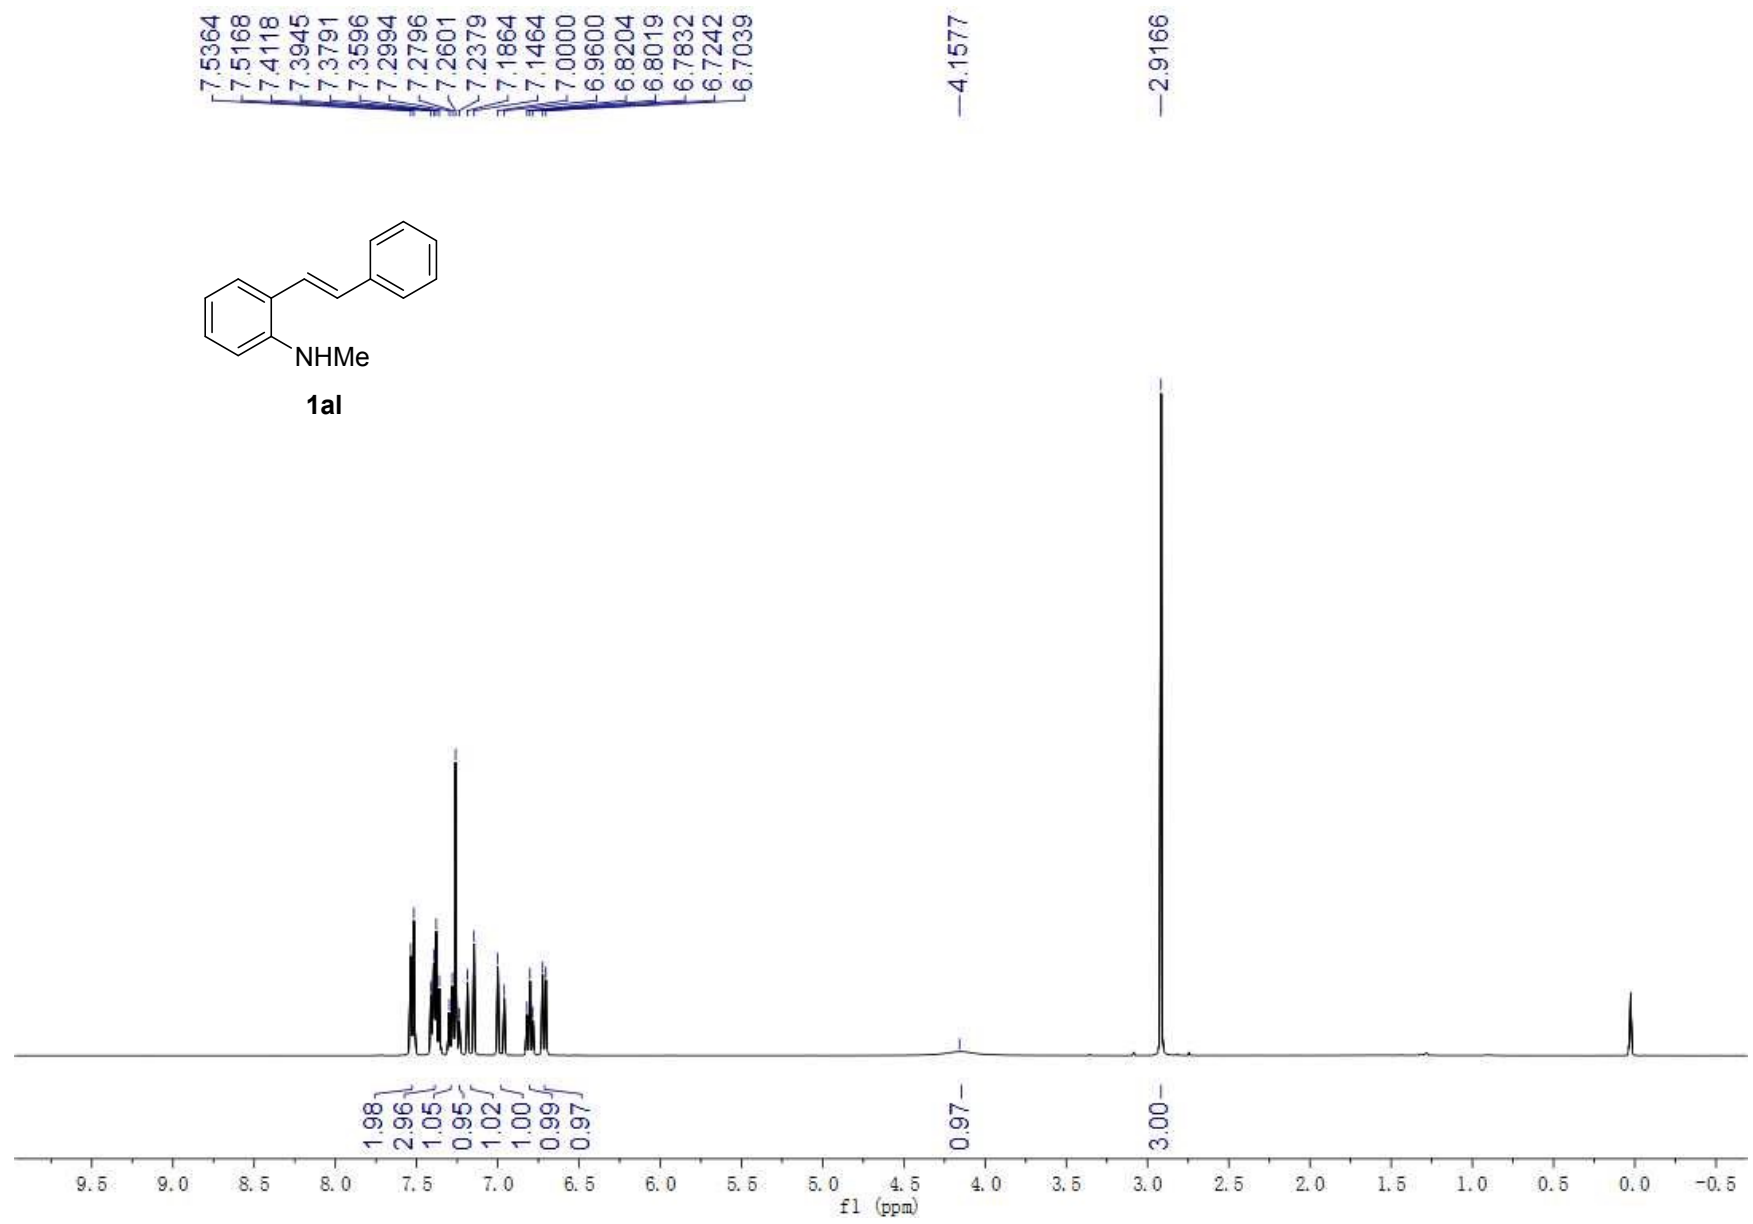

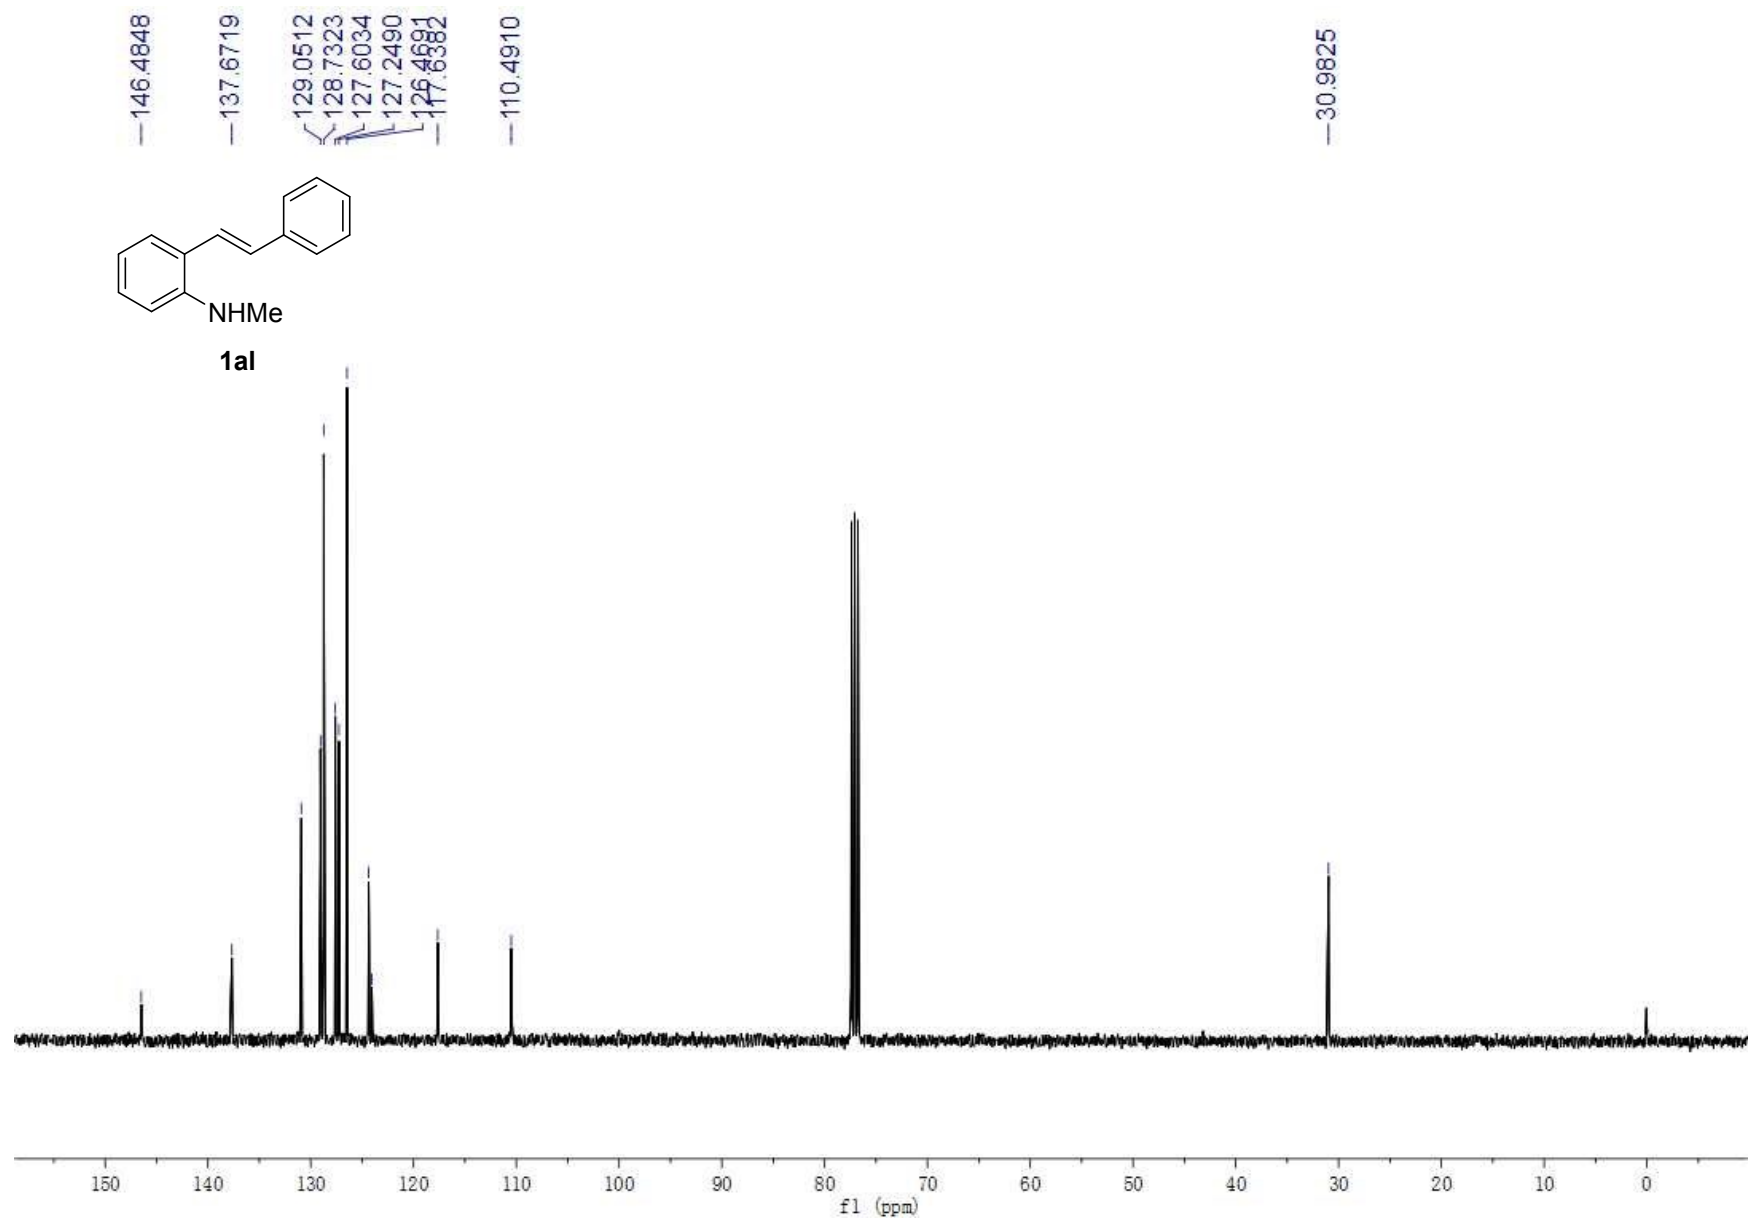

7.4138  
7.4014  
7.3224  
7.3116  
7.3006  
7.2733  
7.2615  
7.2500  
7.2052  
7.1932  
7.1793  
7.1668  
7.1481  
7.1018  
7.0901  
7.0768  
7.0668  
6.9124  
6.8858  
6.7125  
6.7006  
6.6887  
6.6015  
6.5886

4.3074

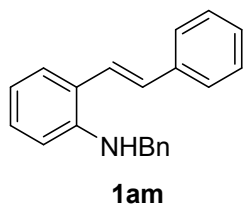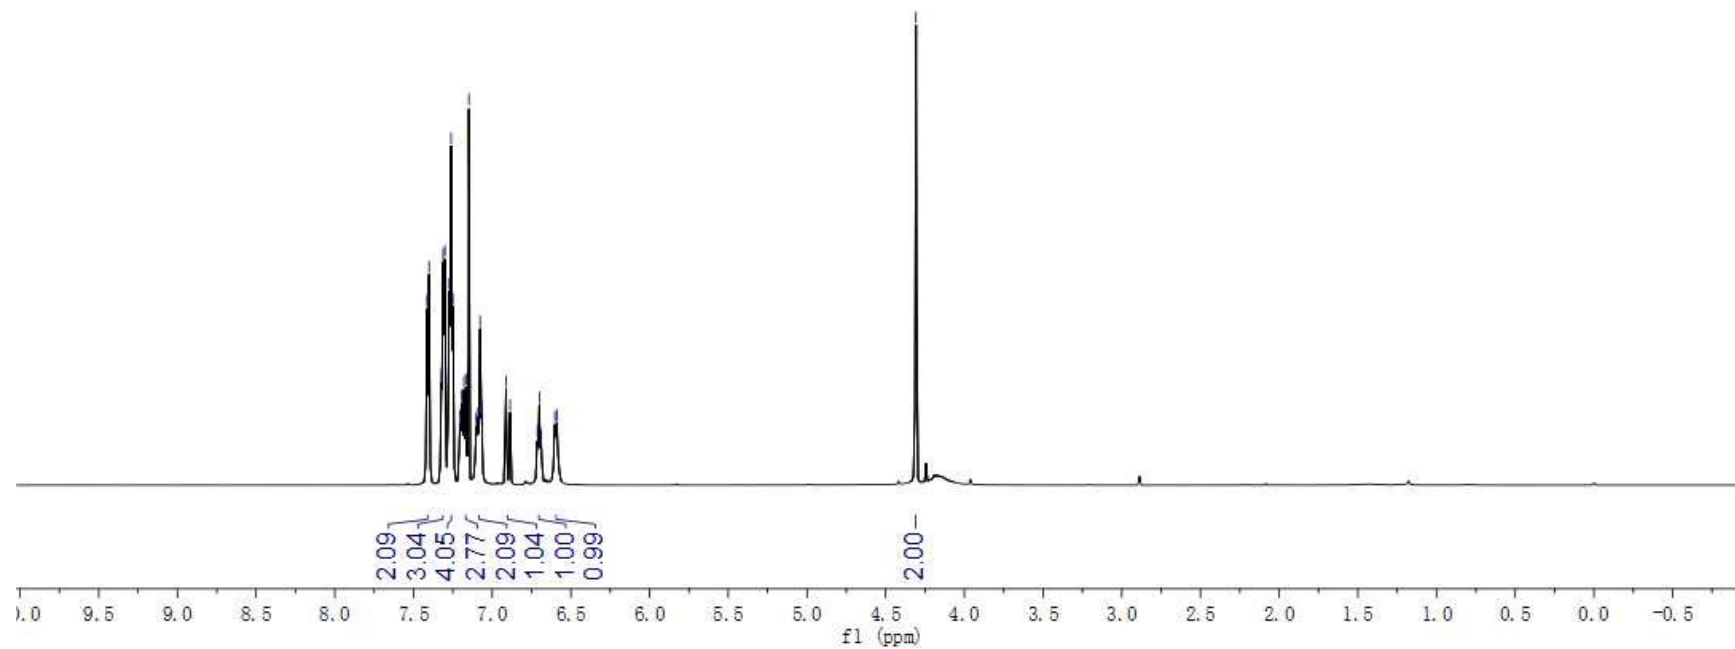

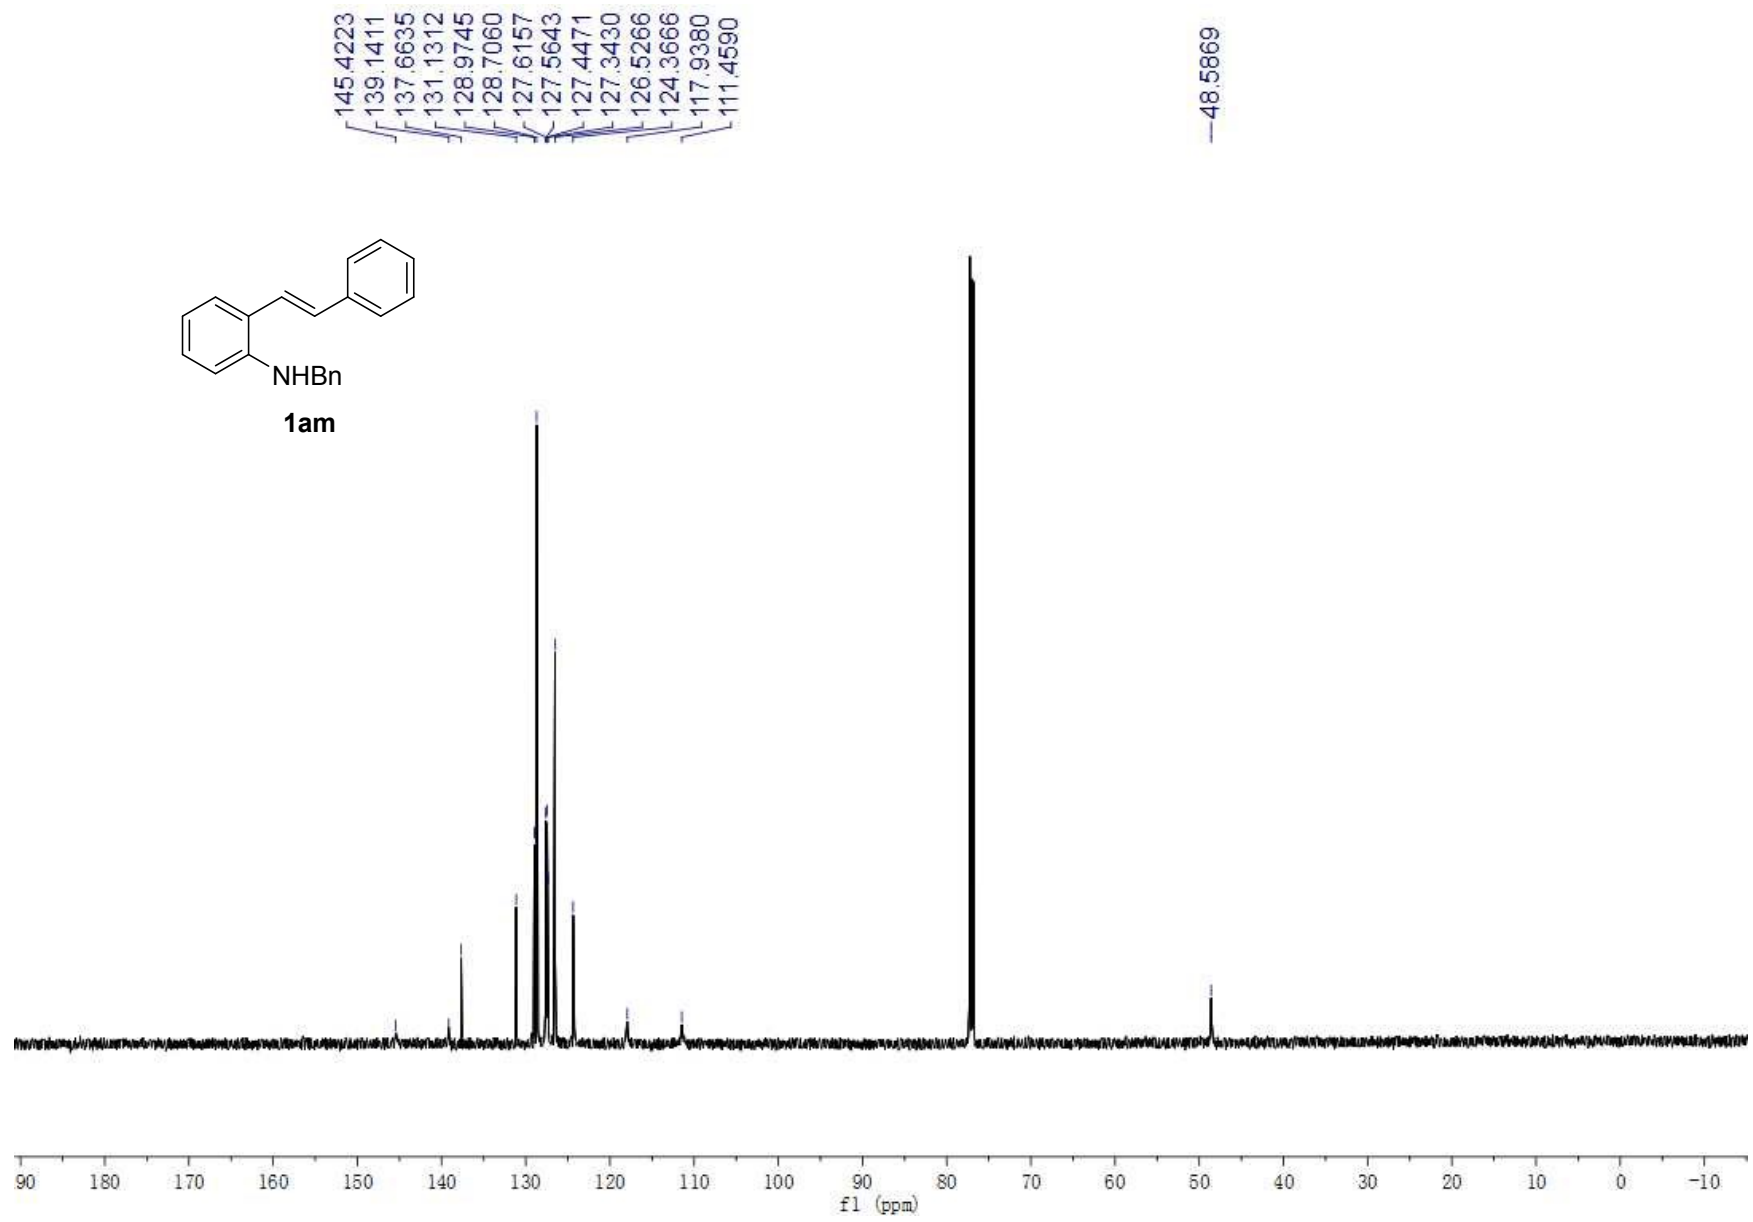

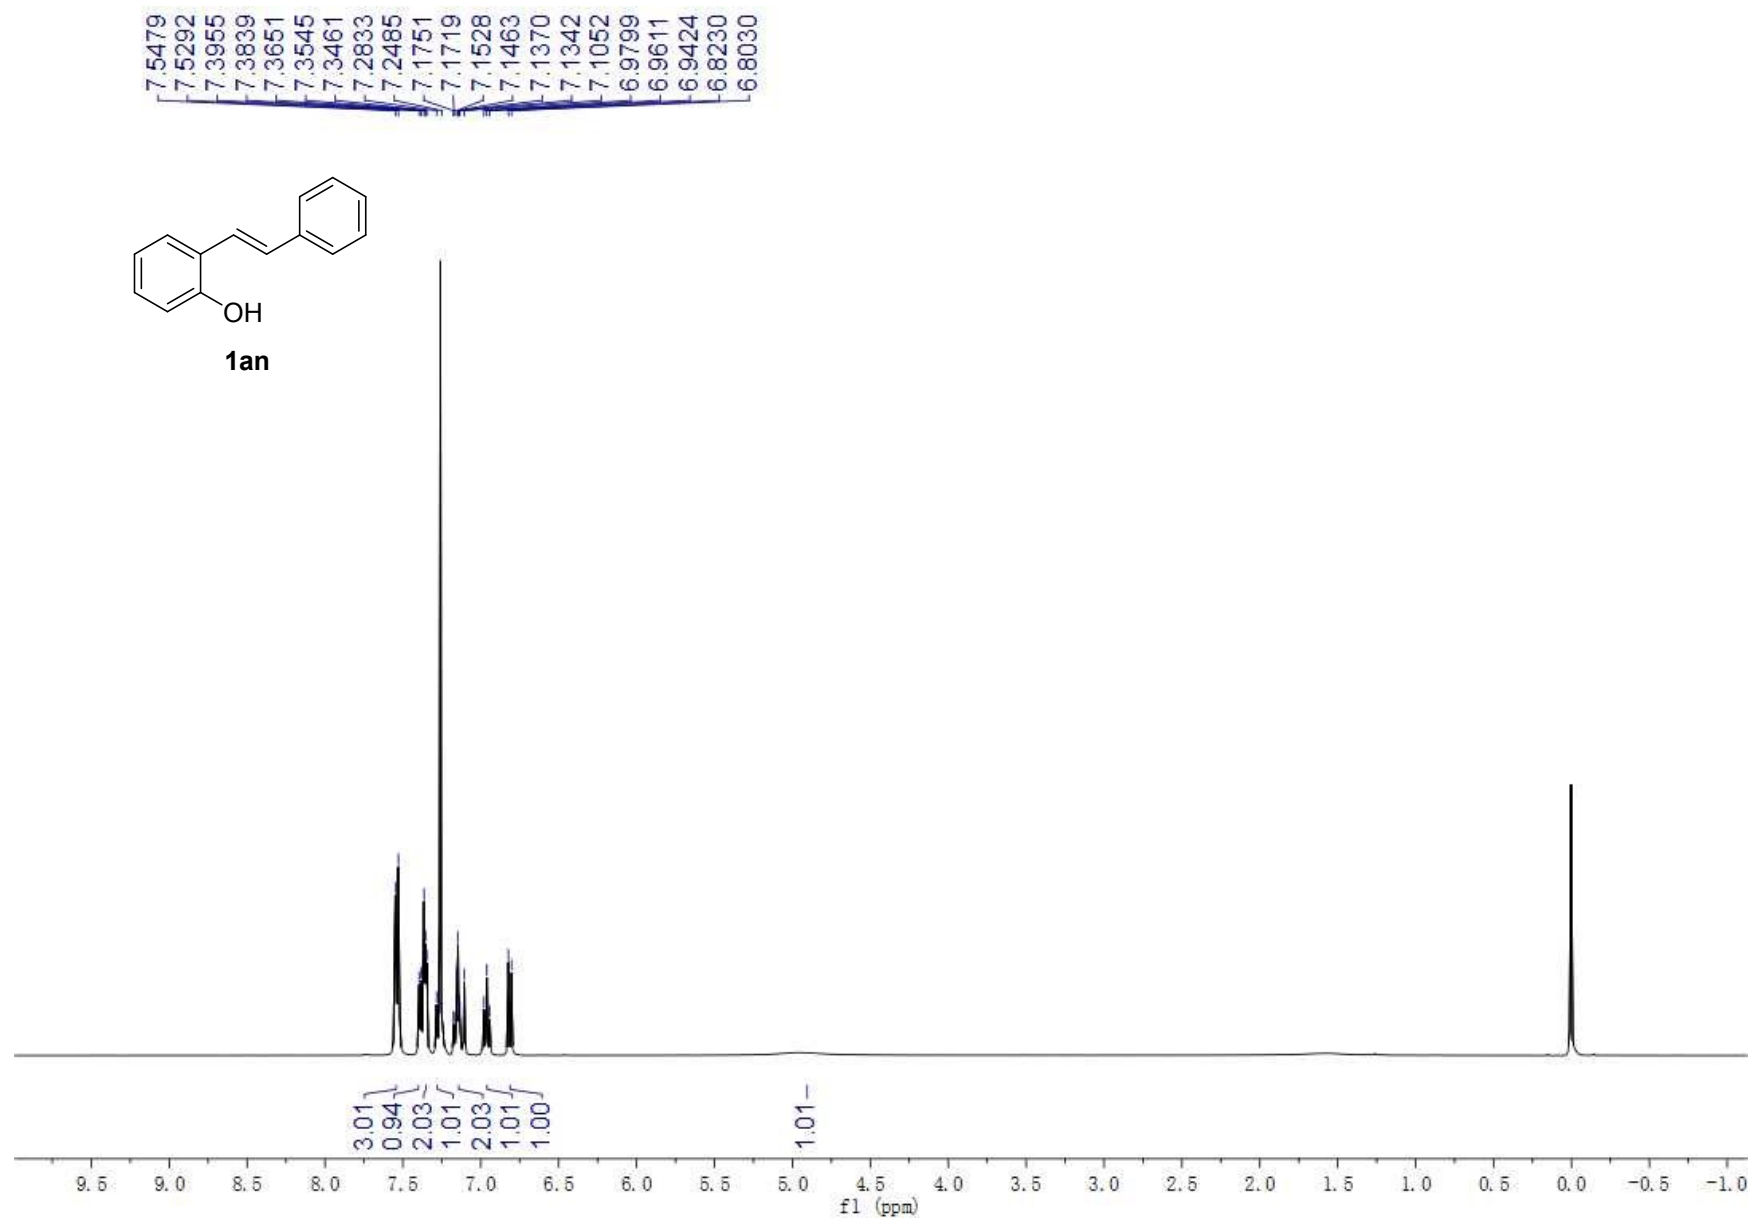

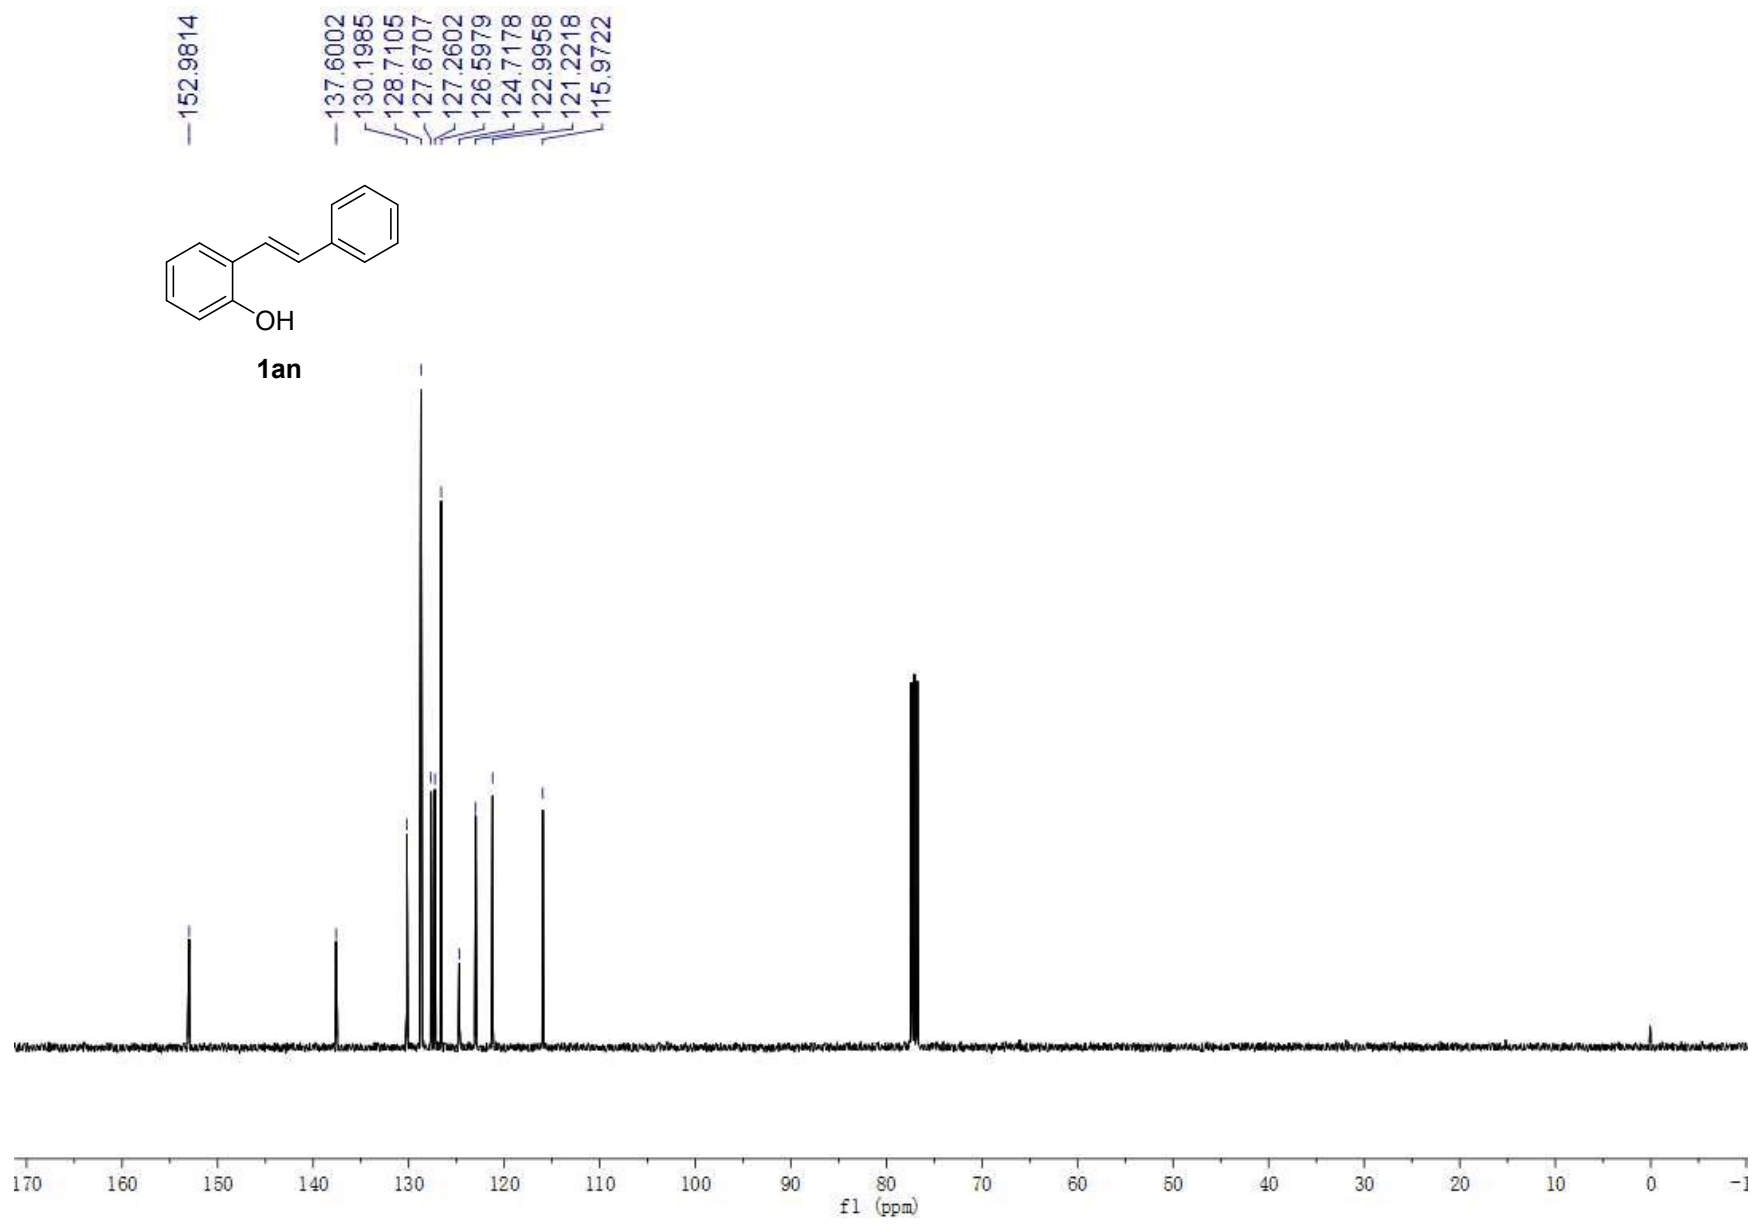

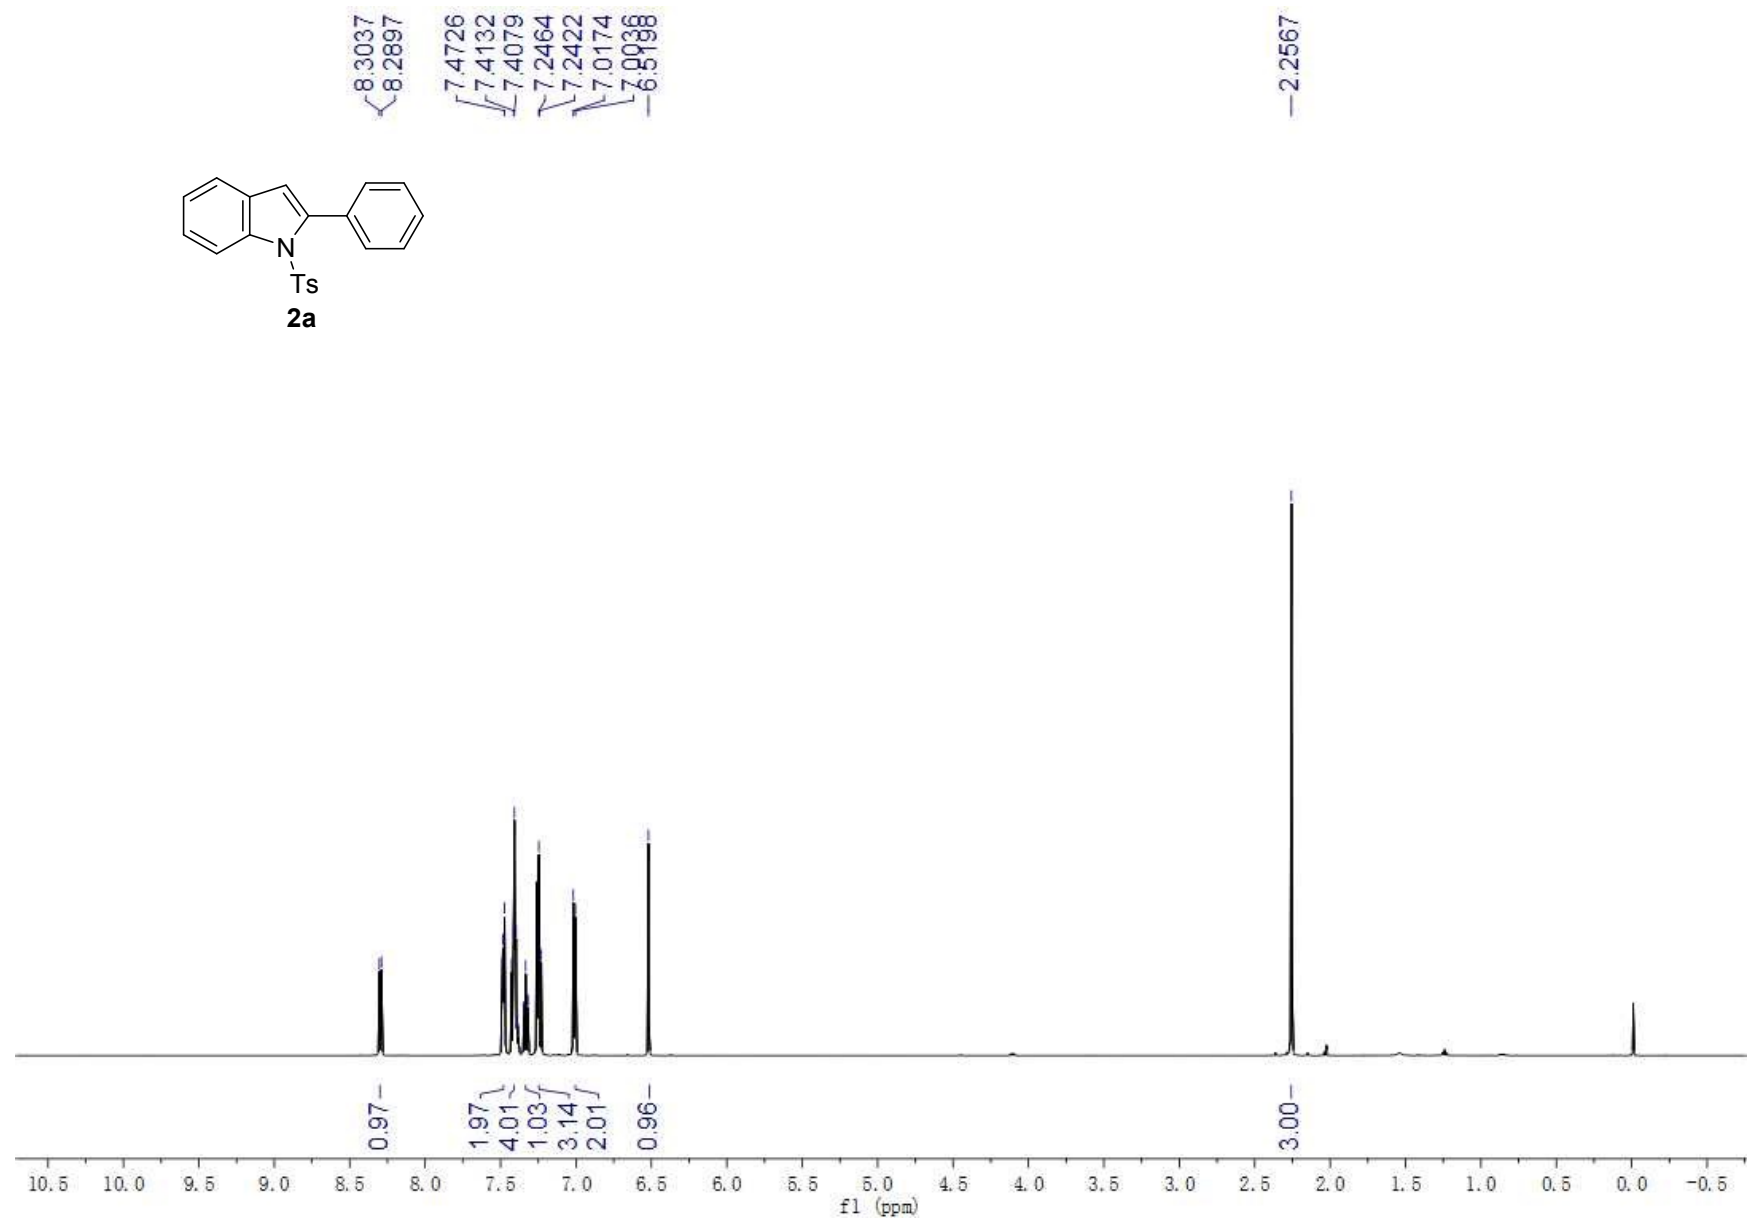



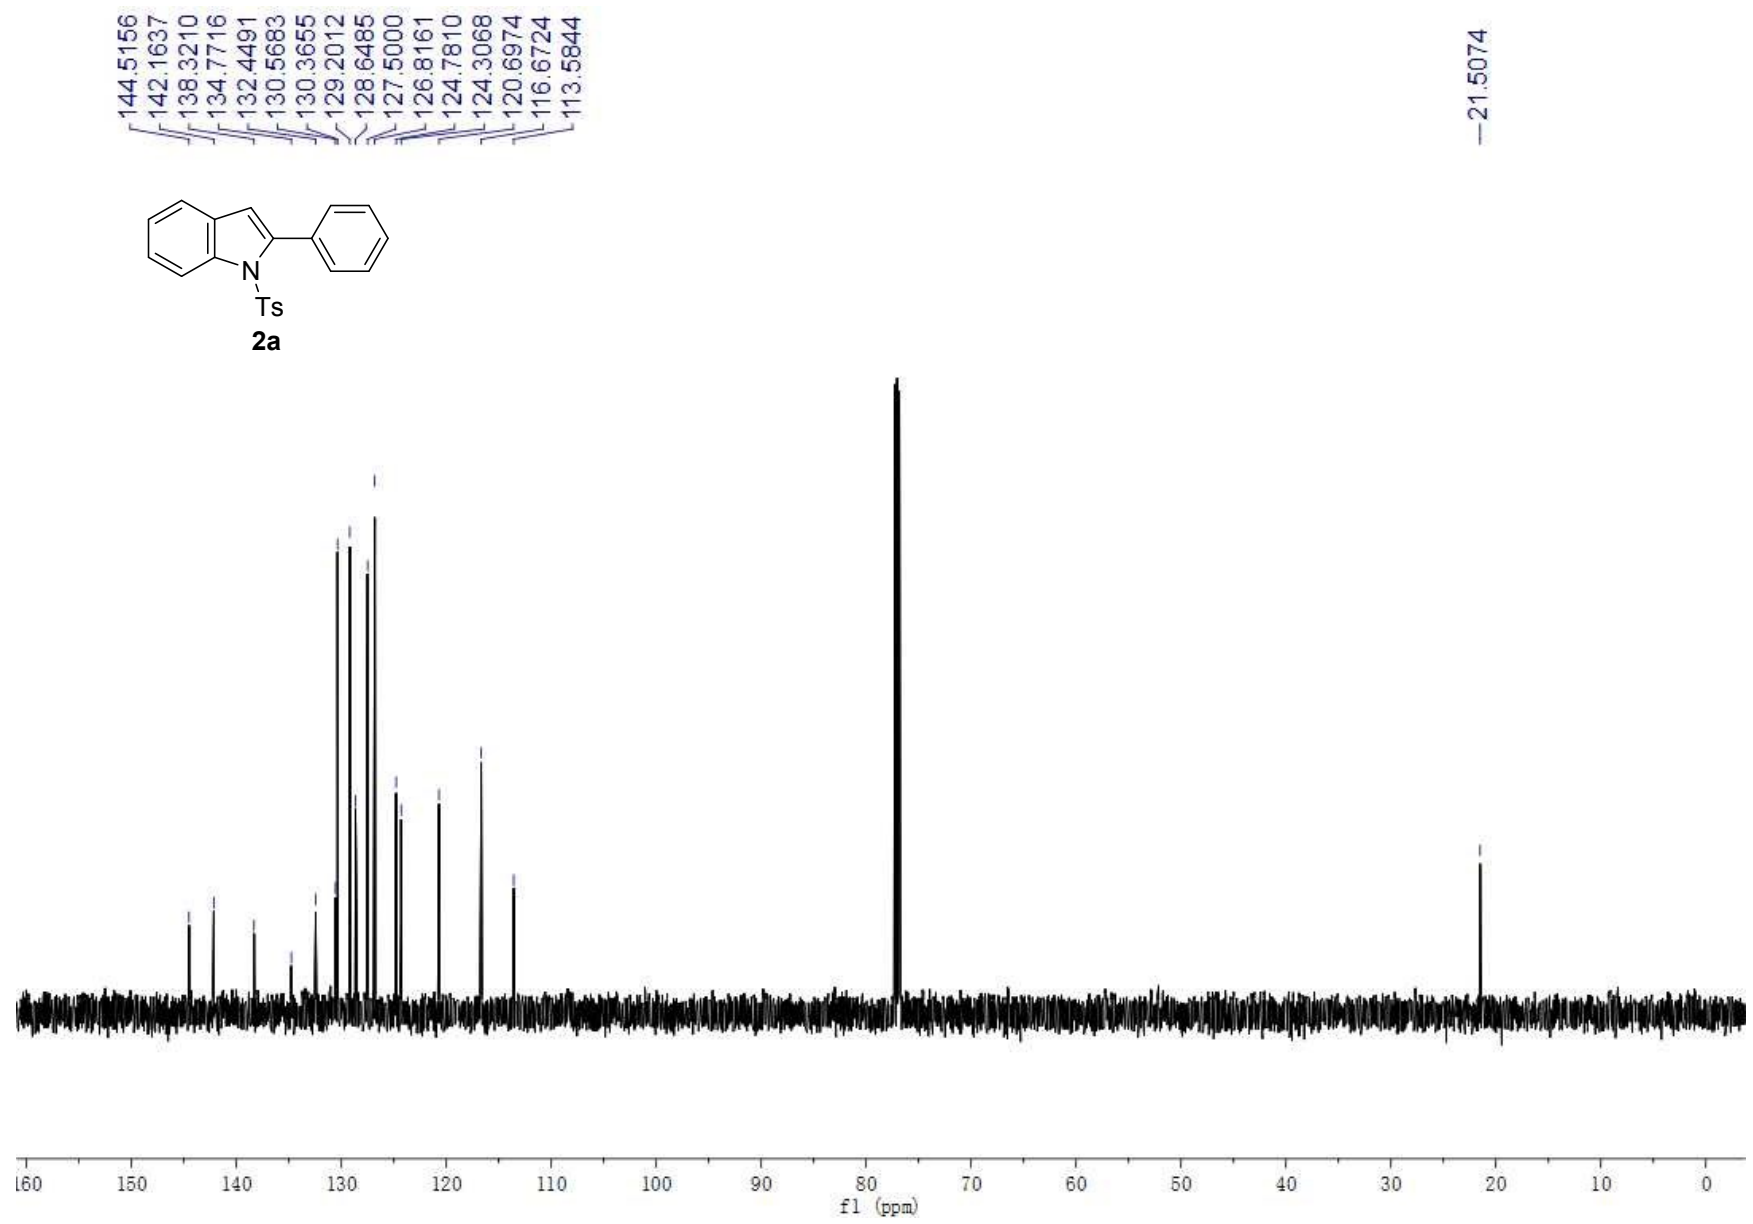

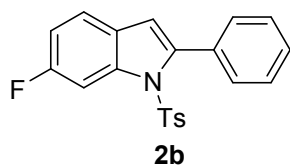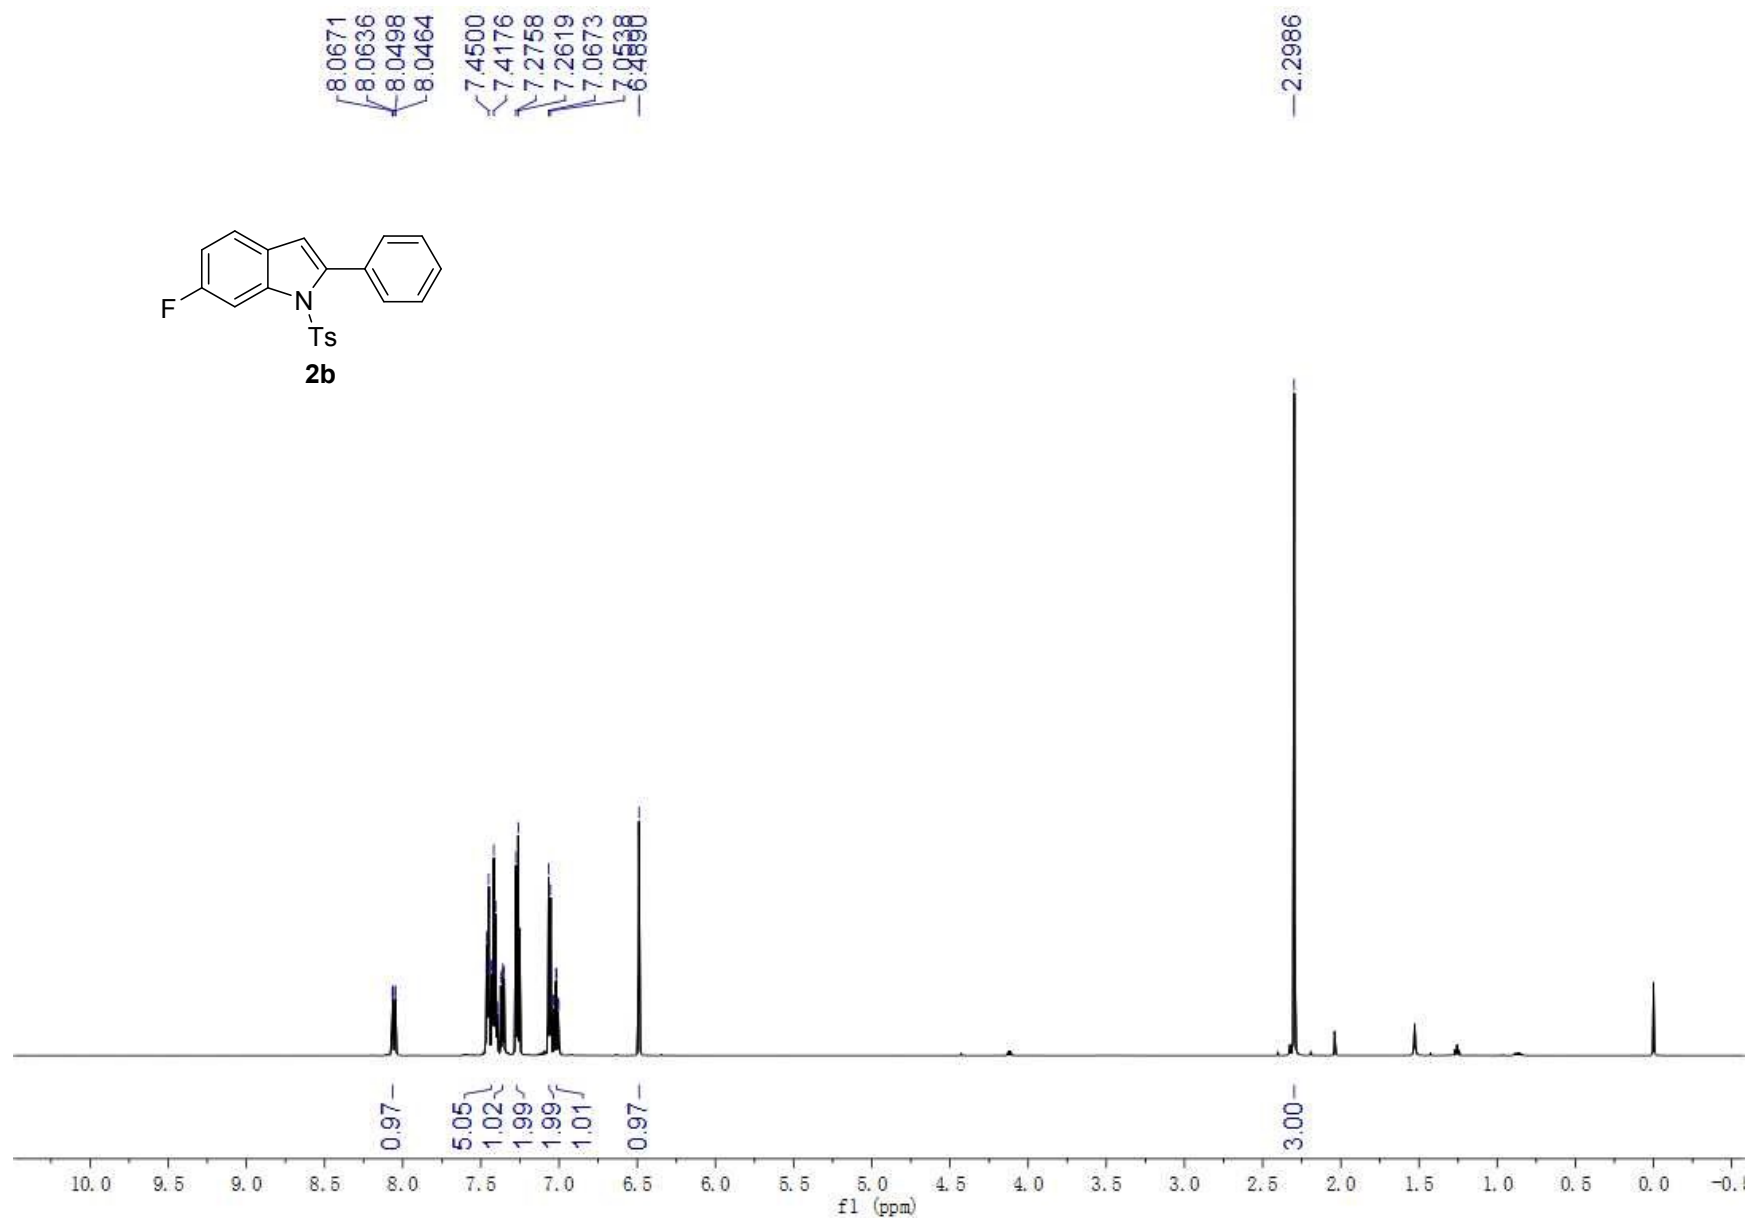

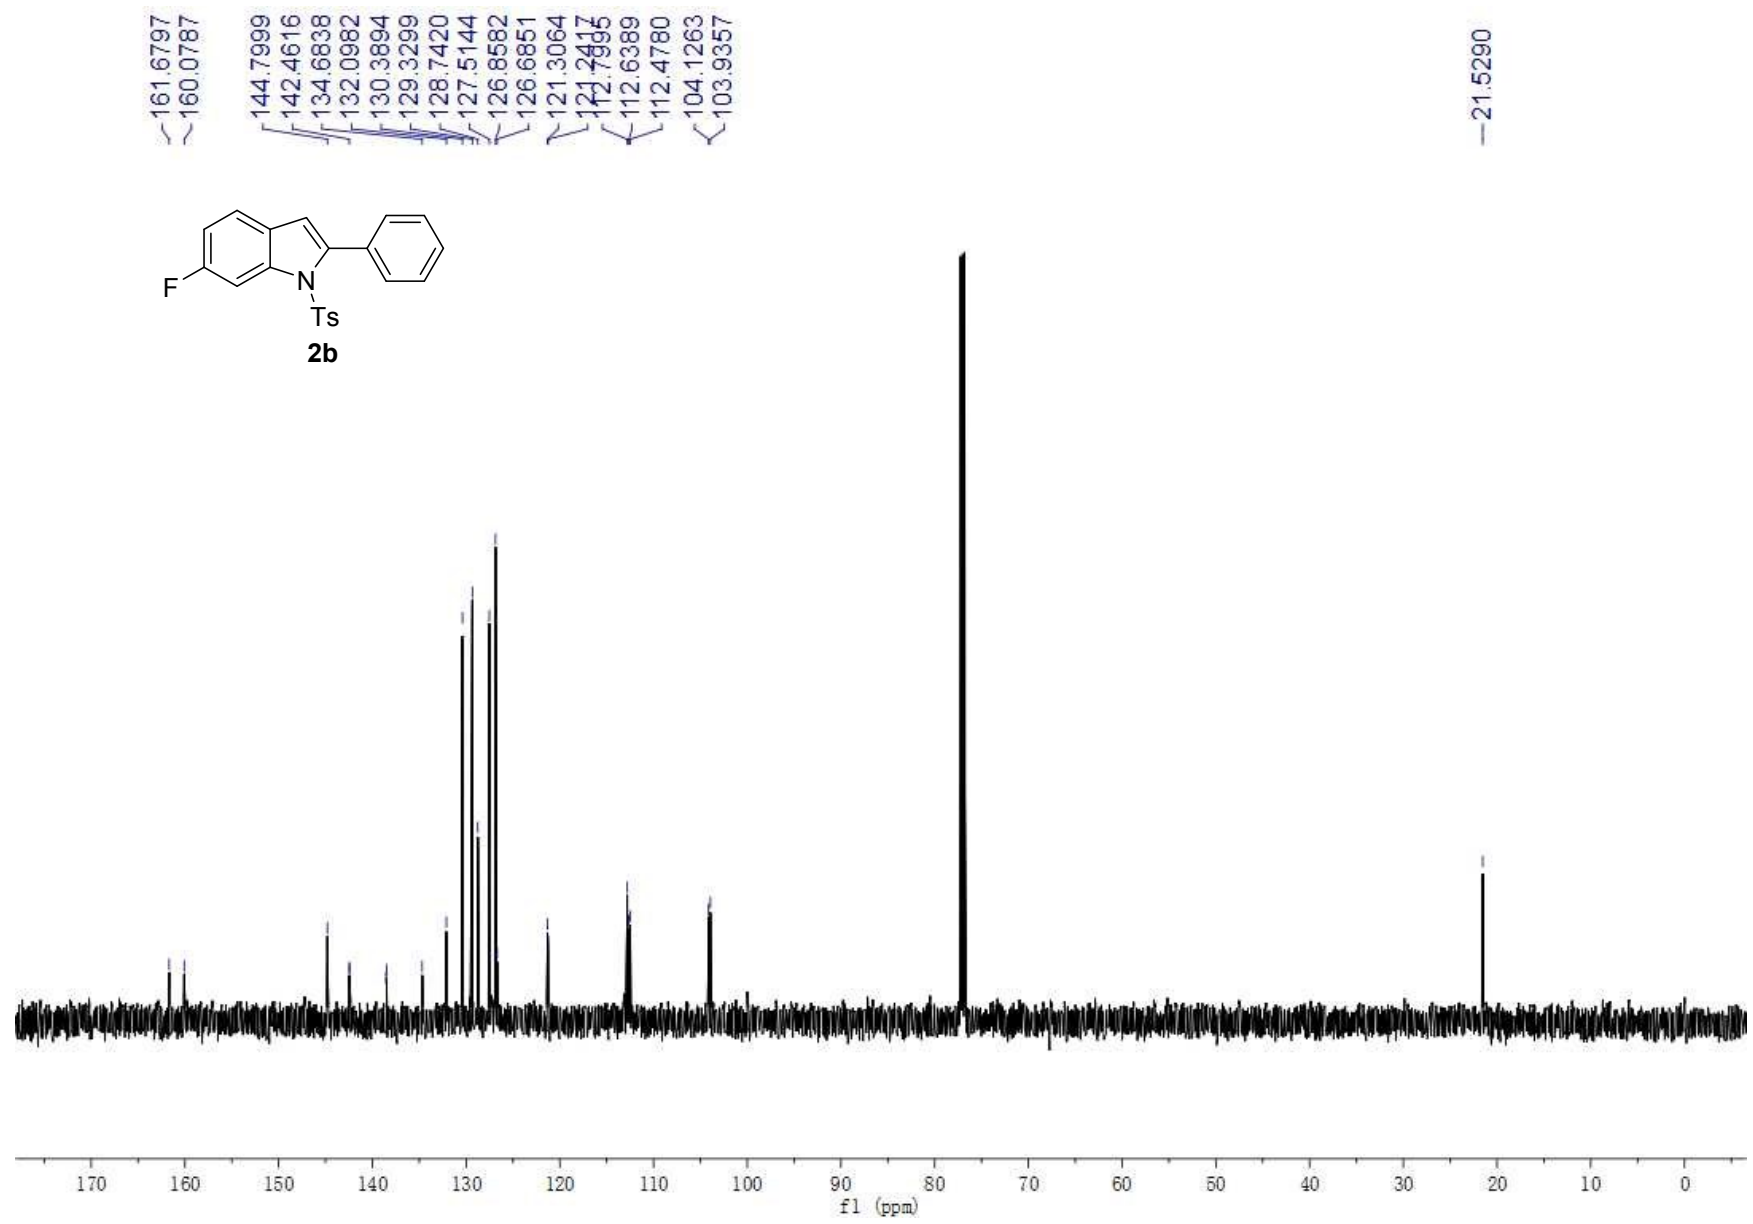

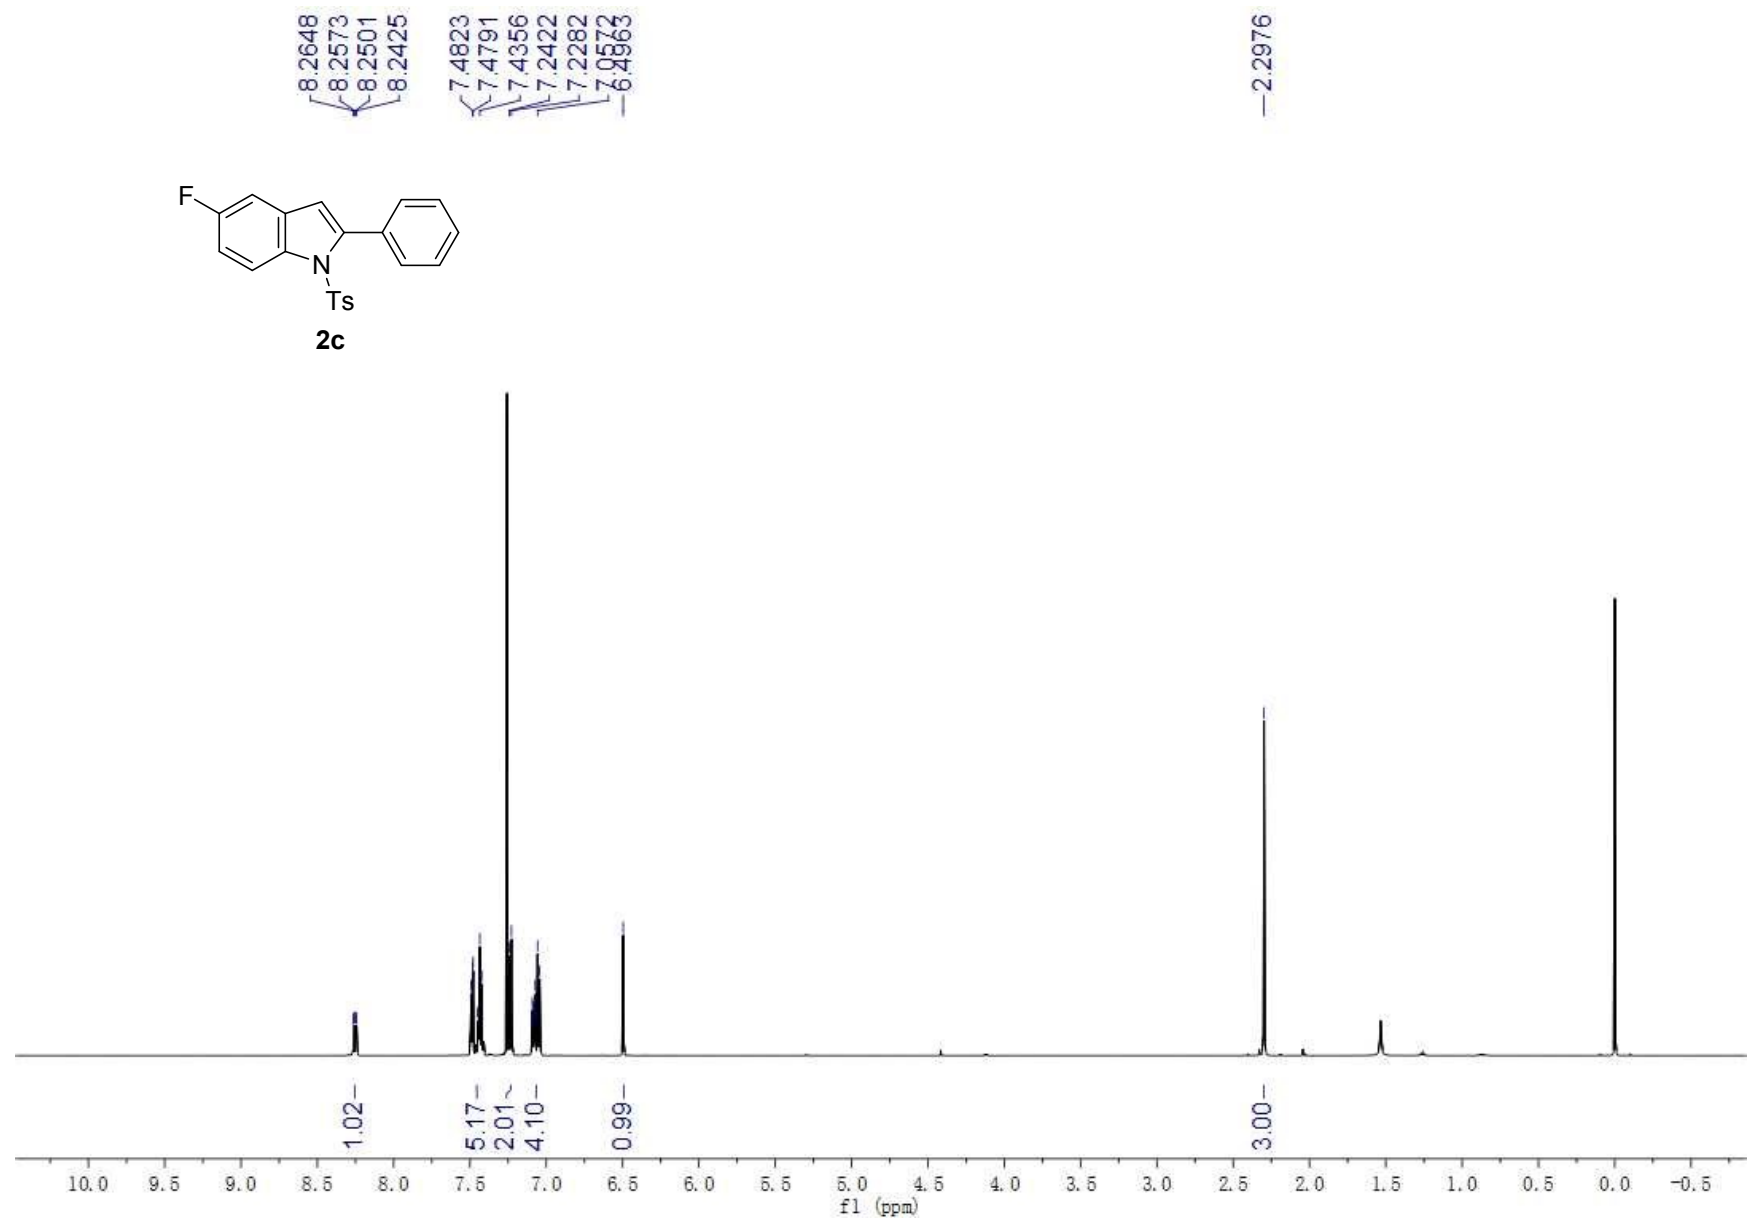

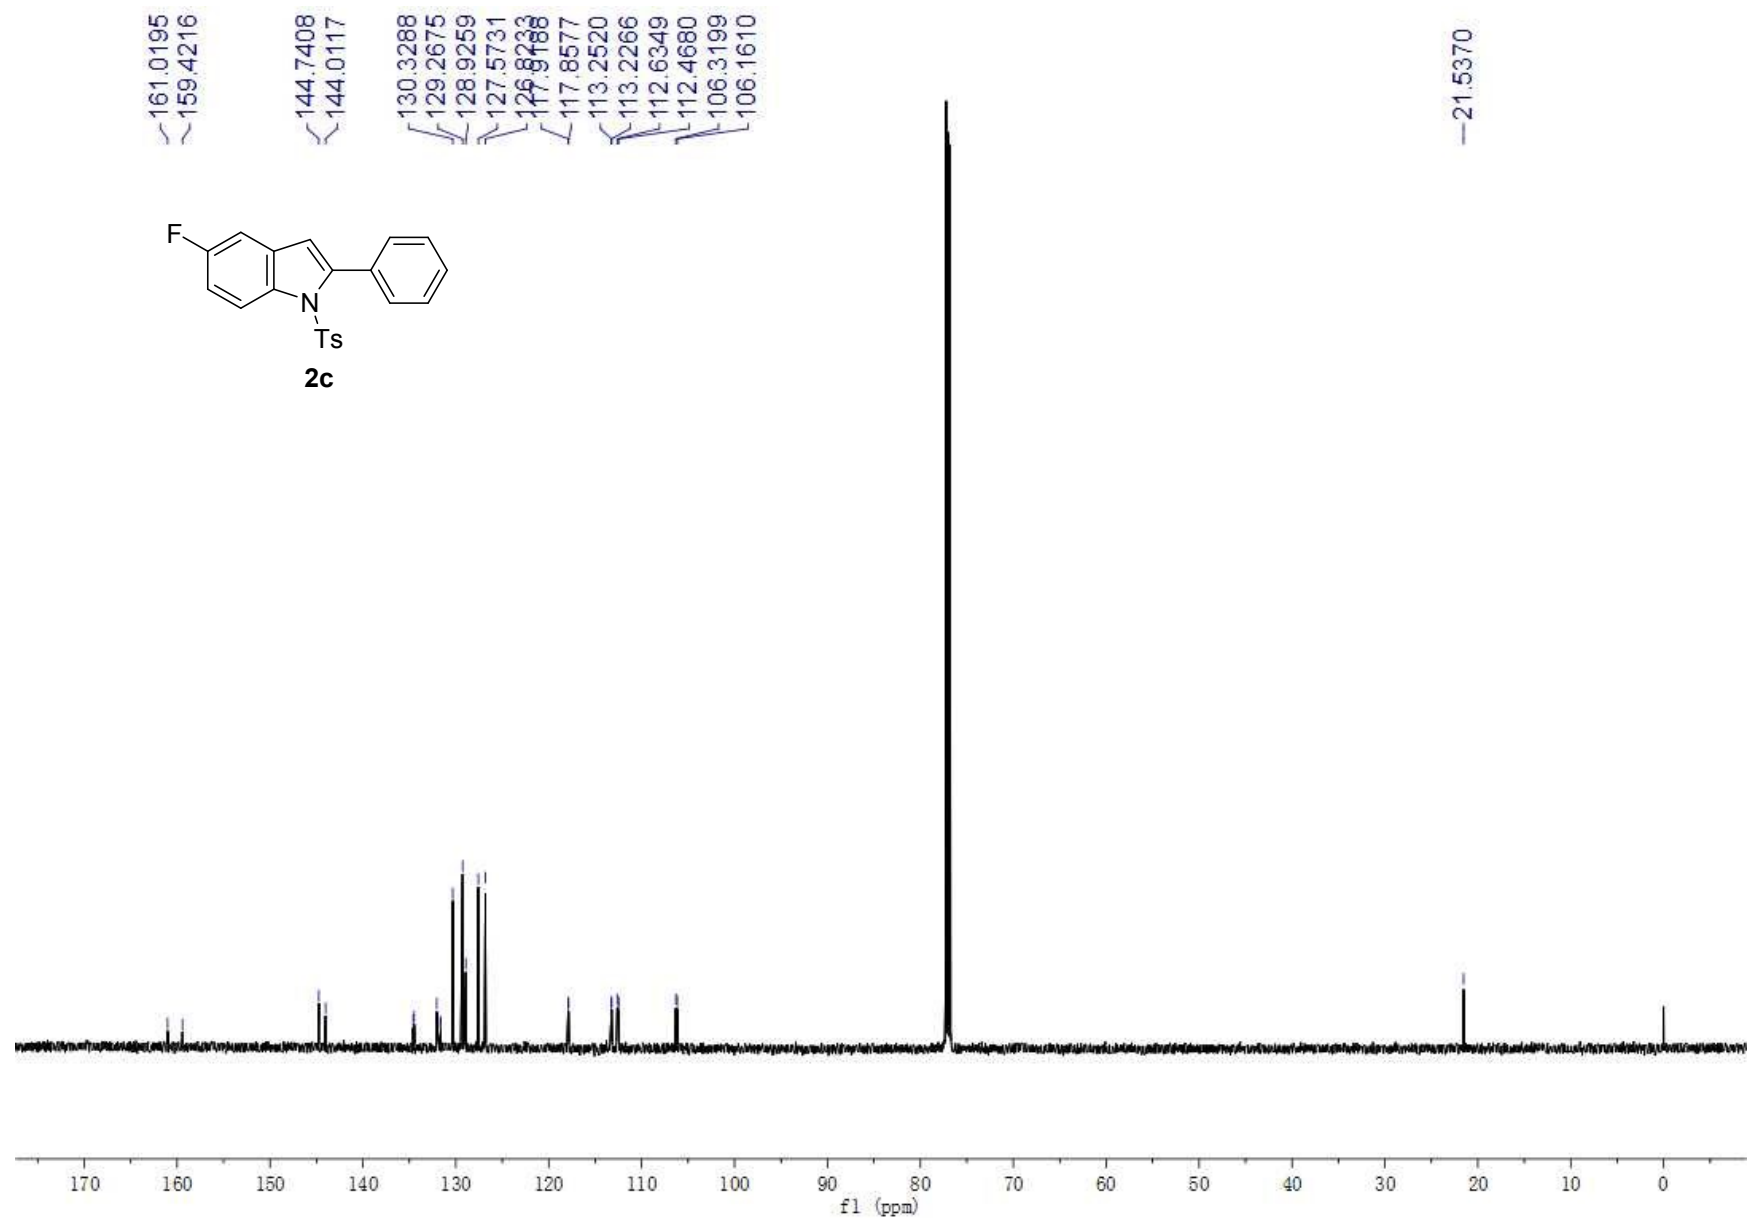

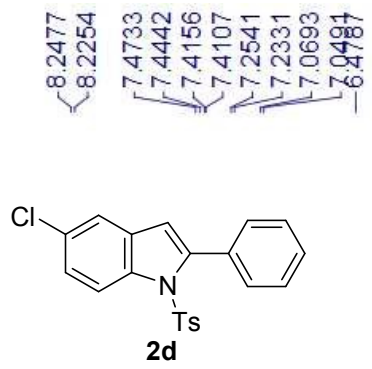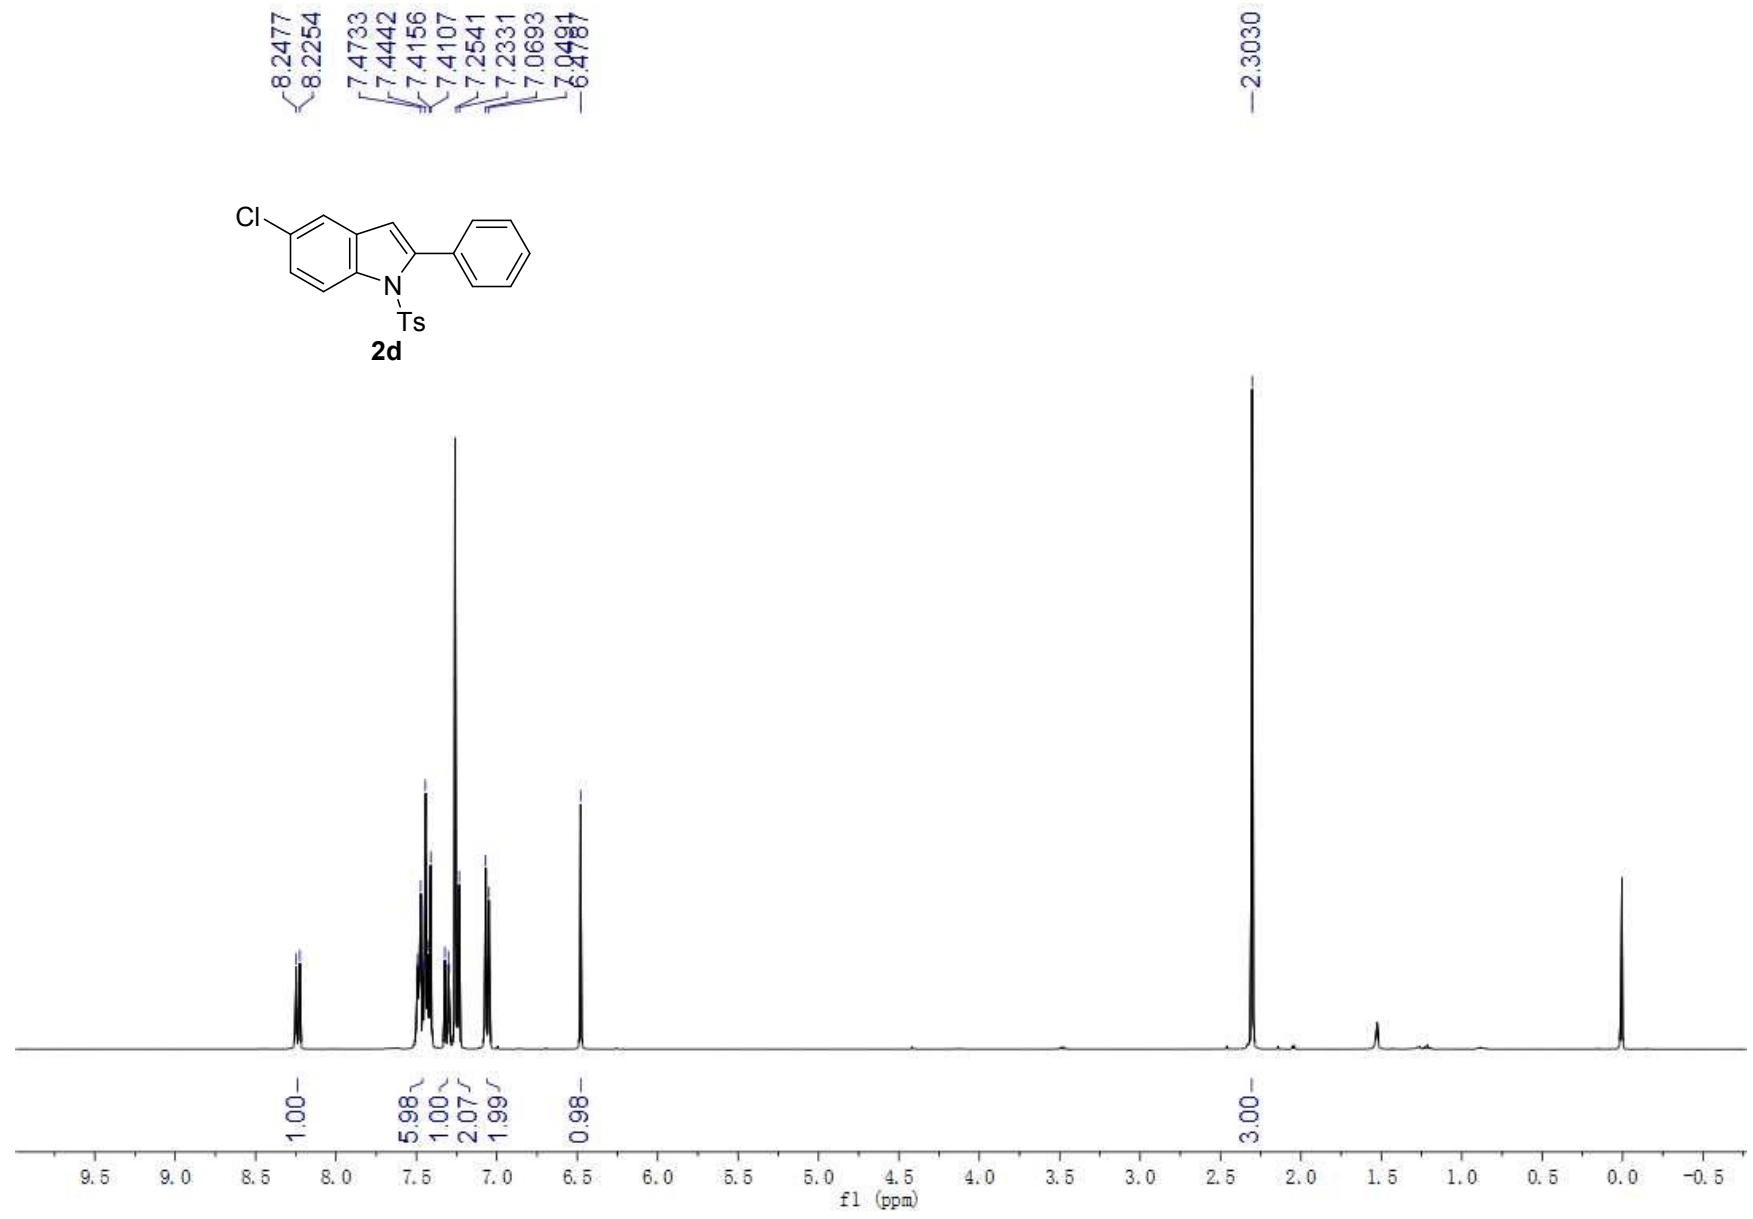

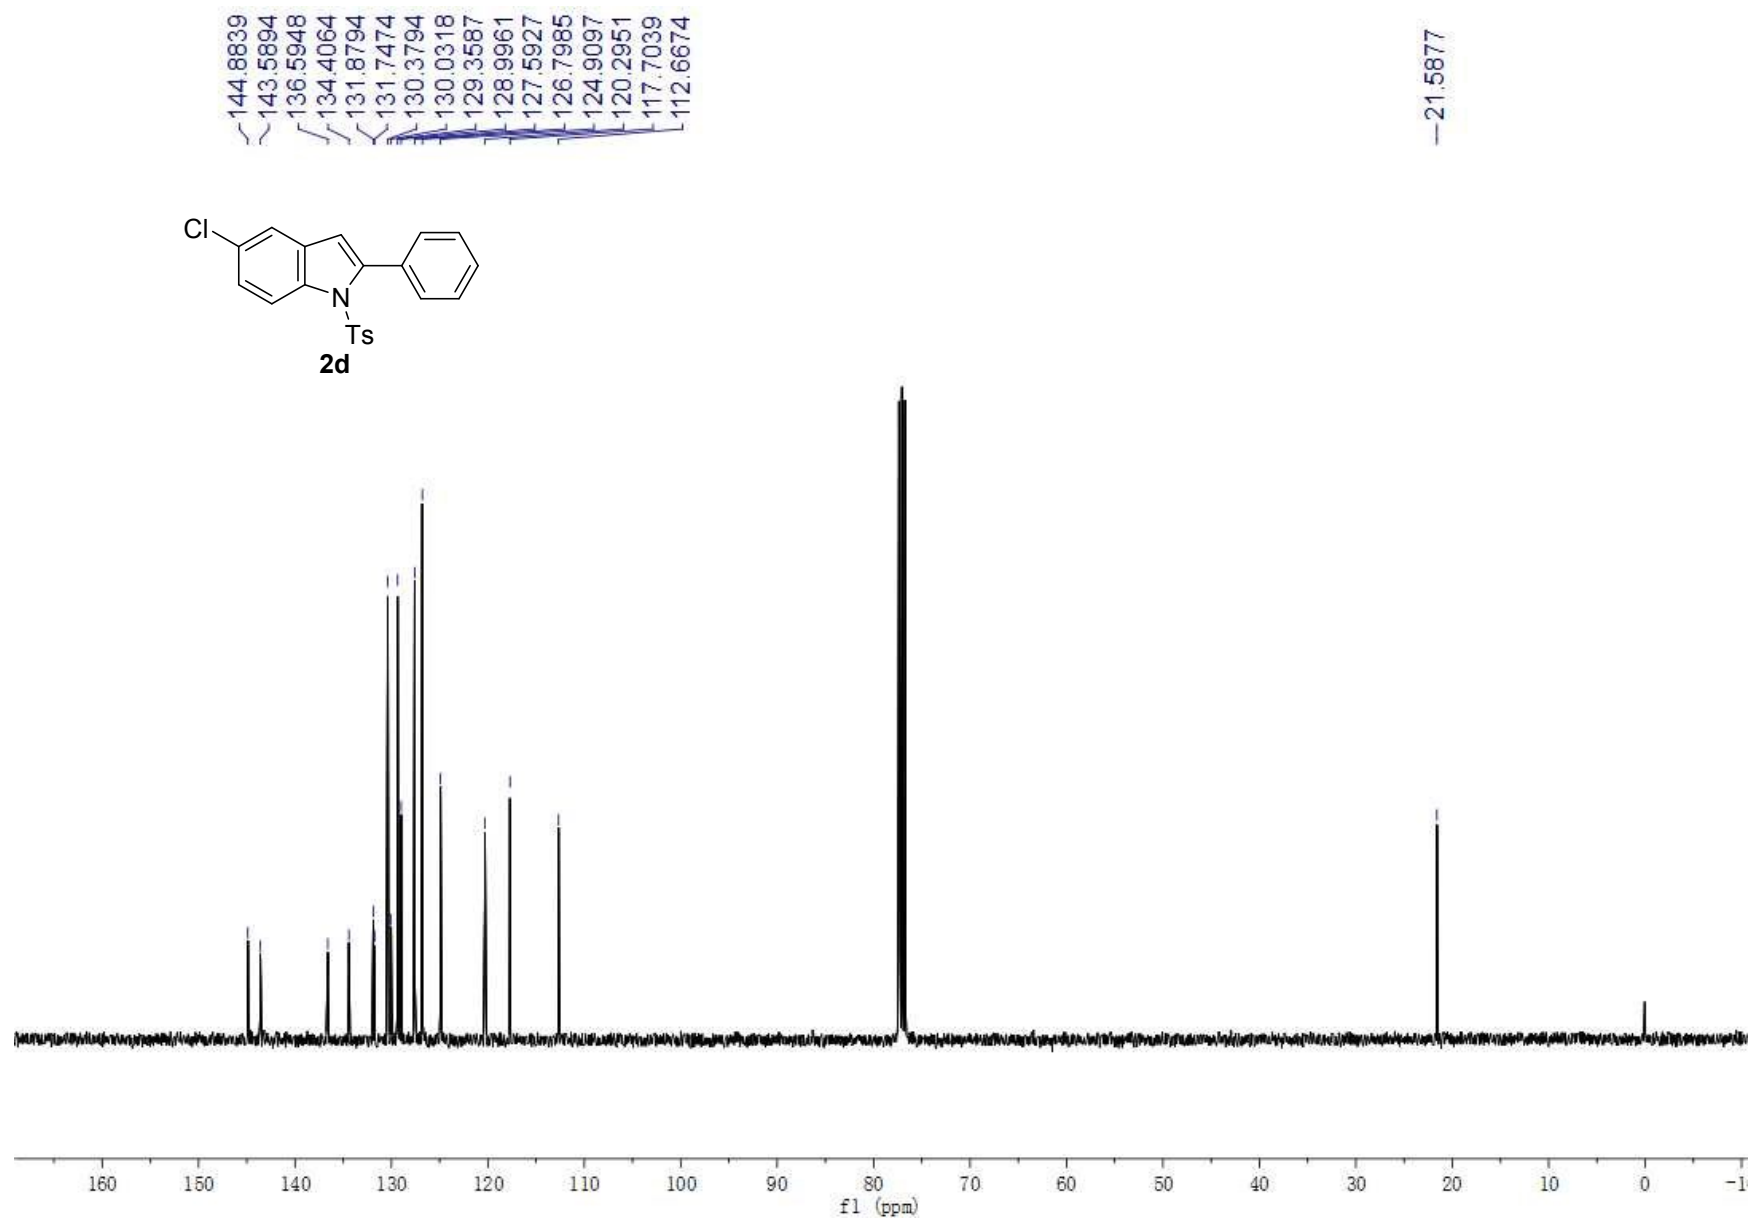

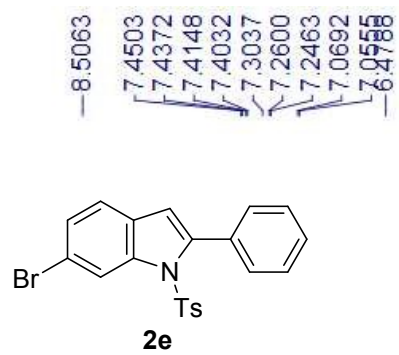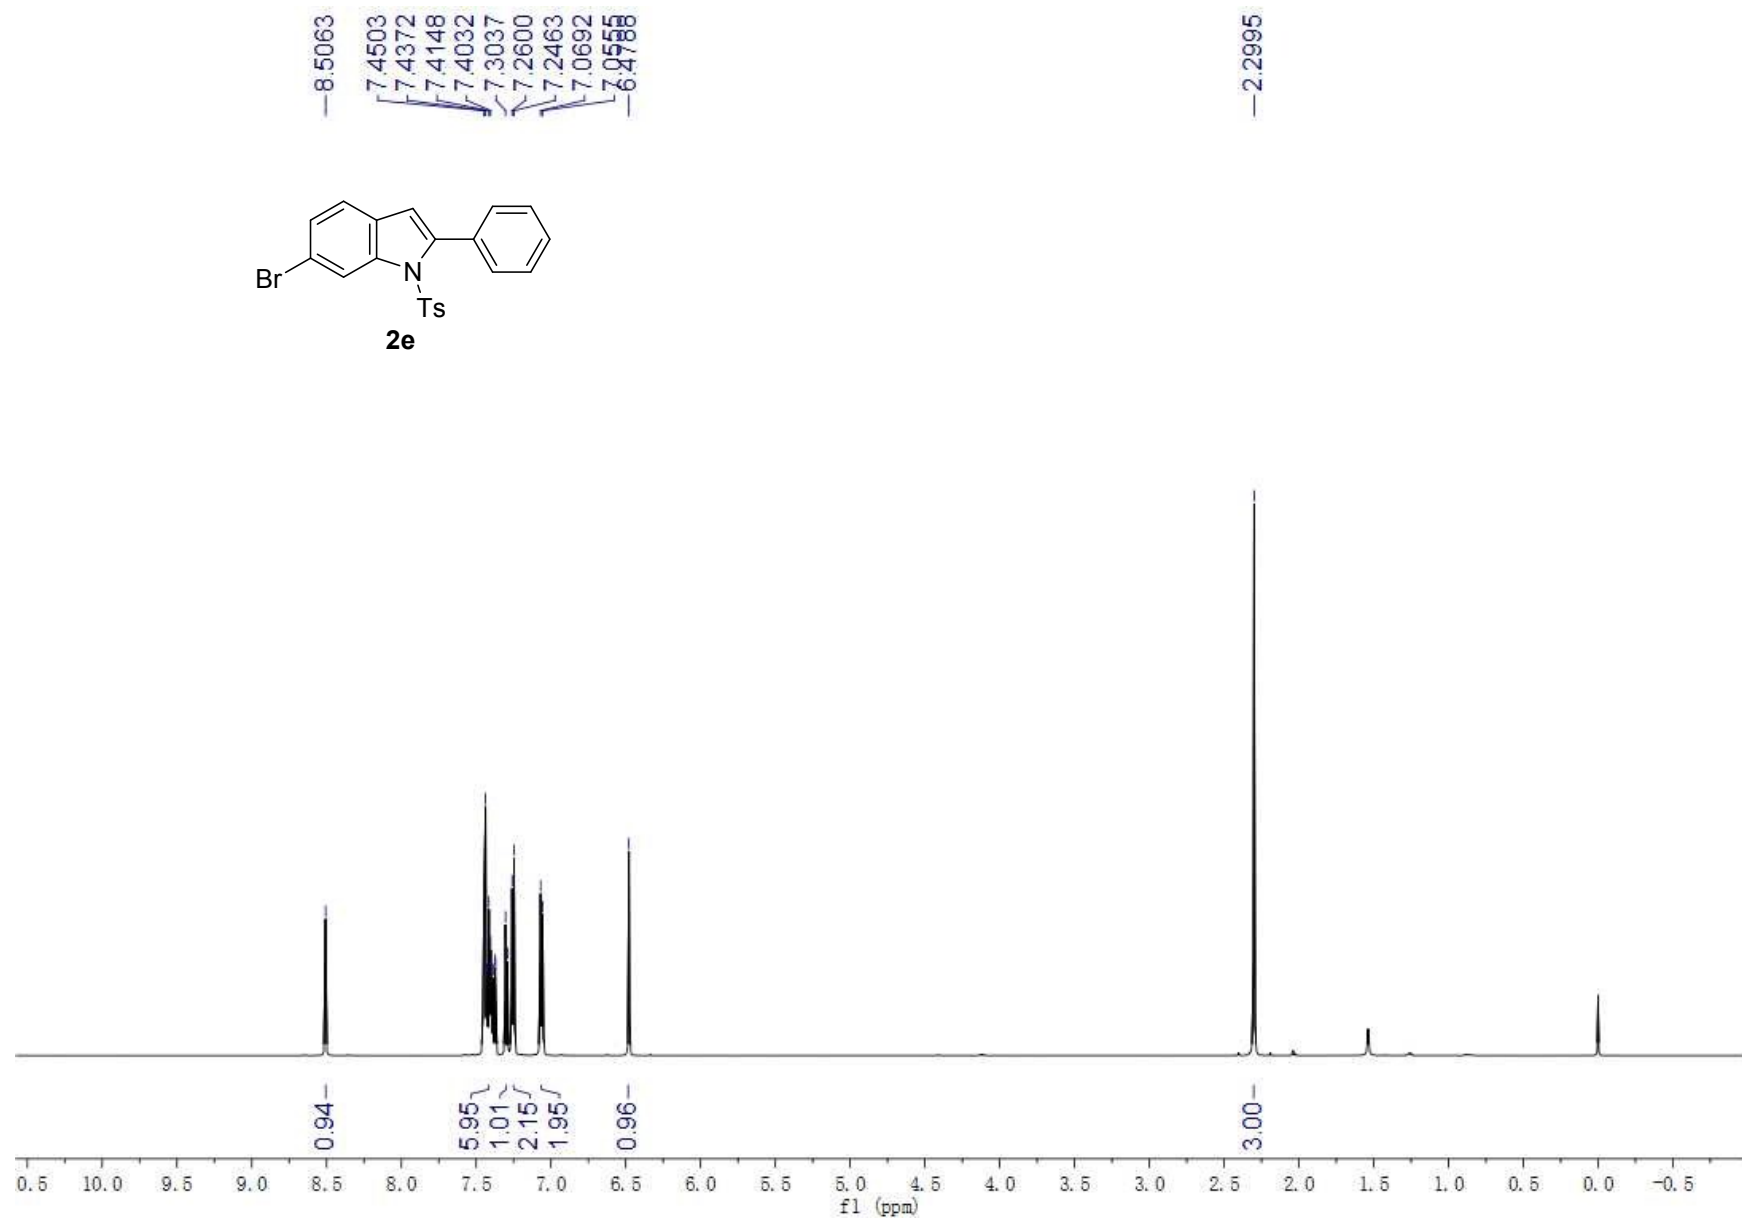



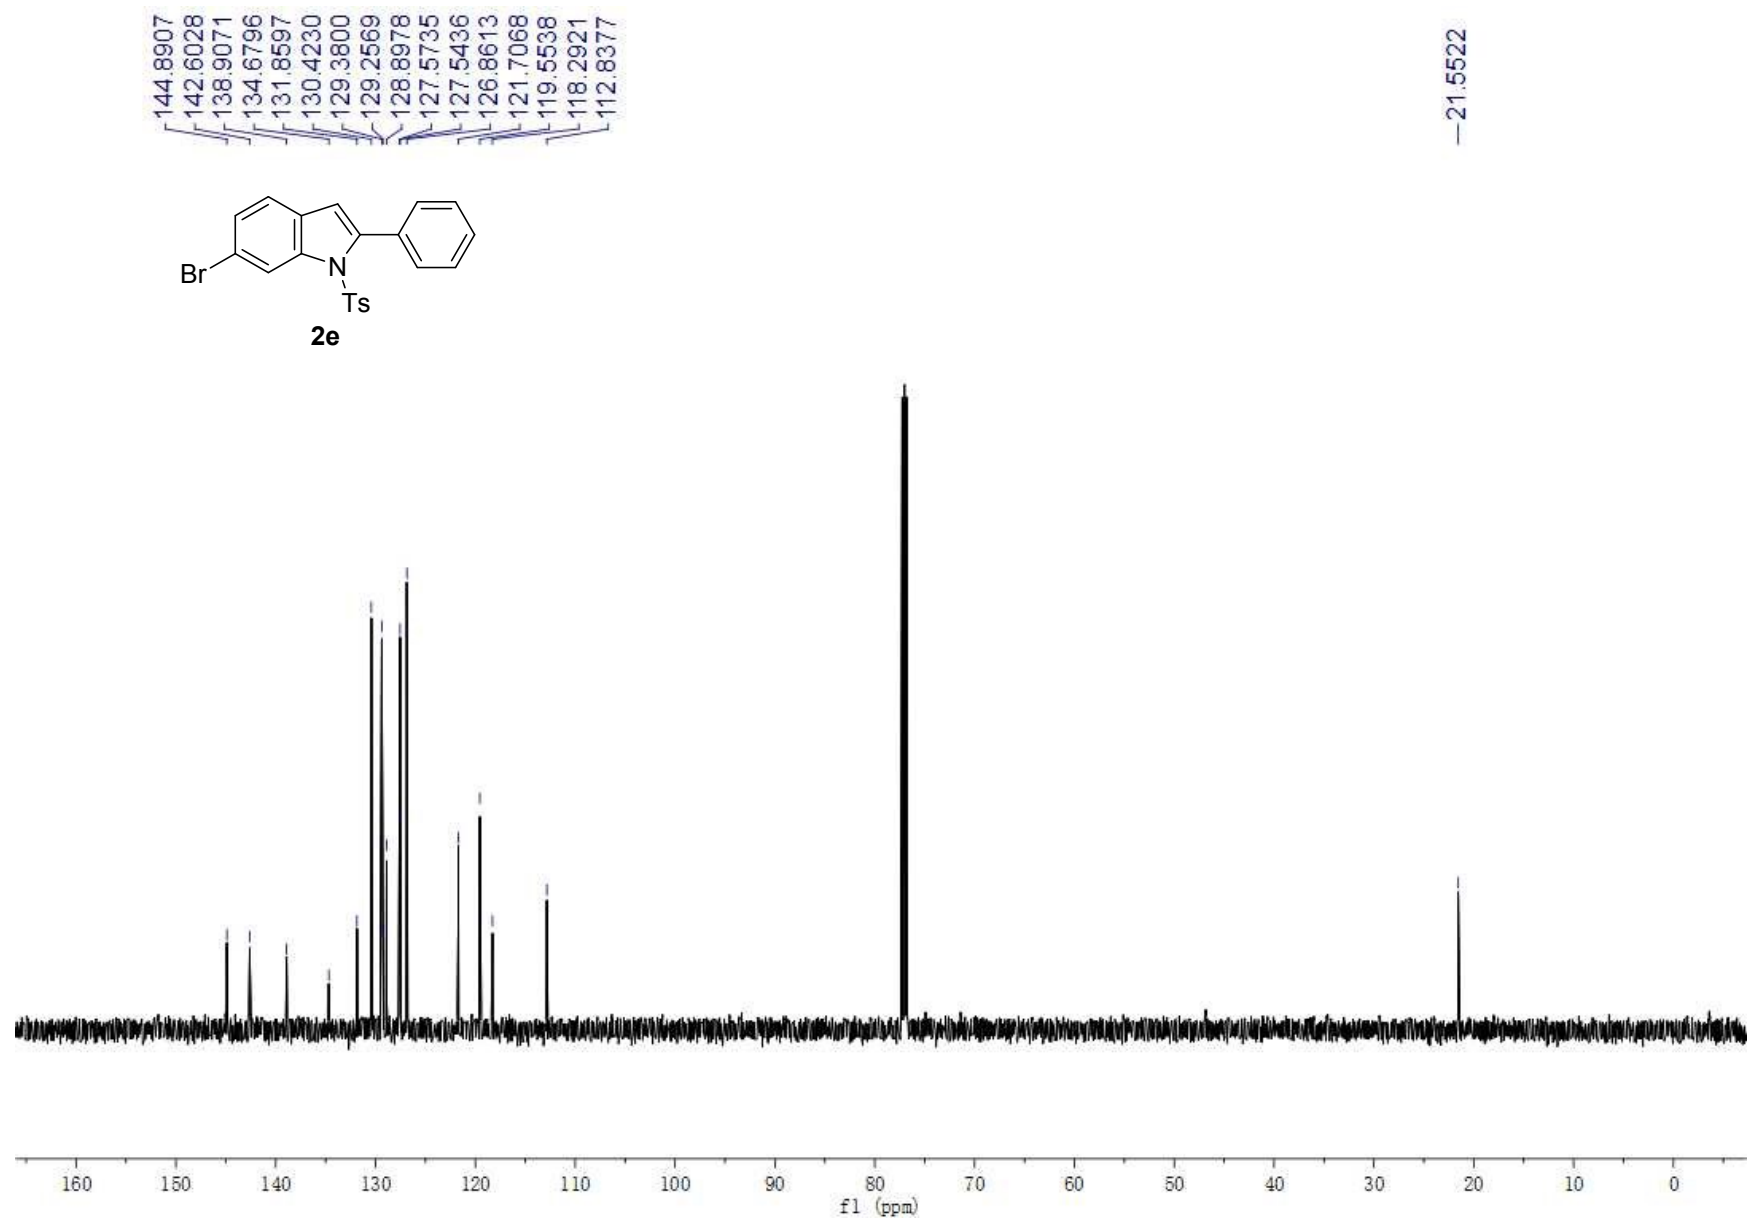

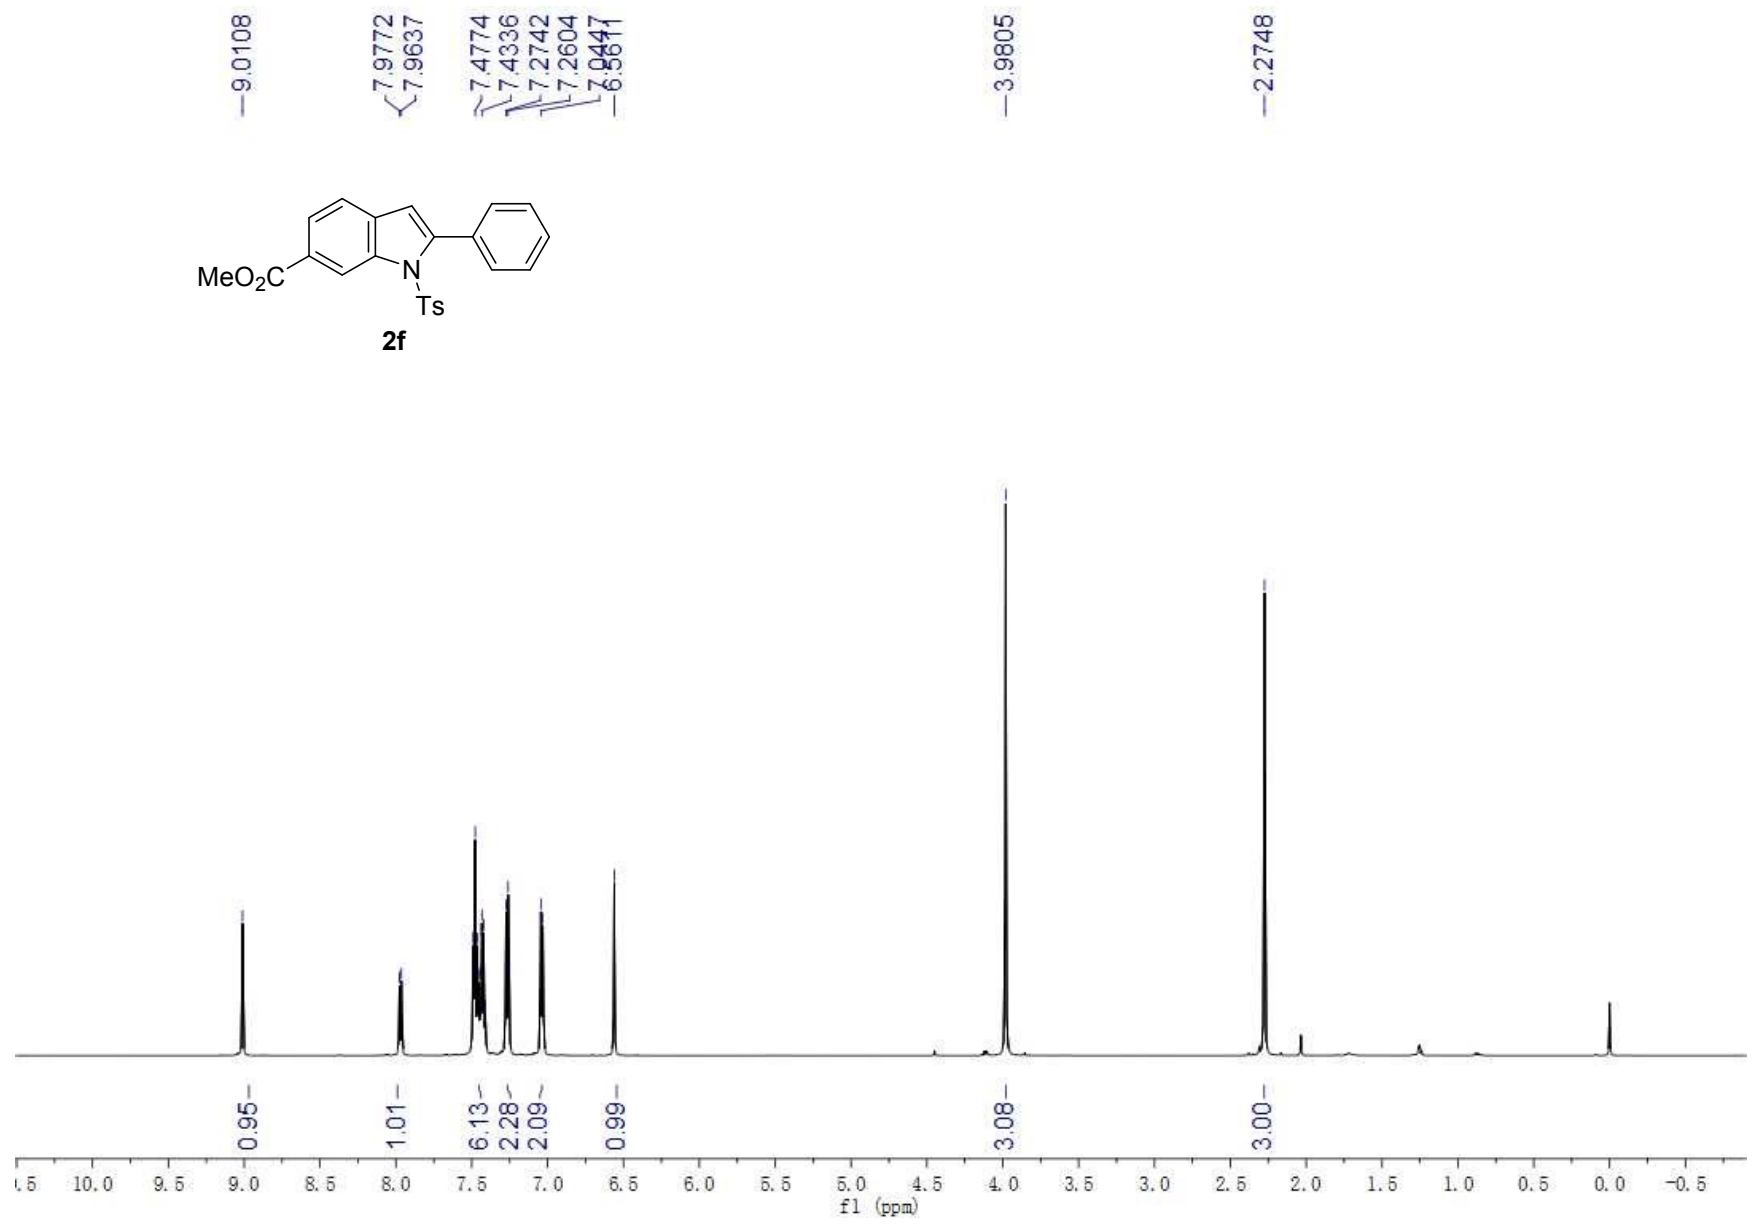

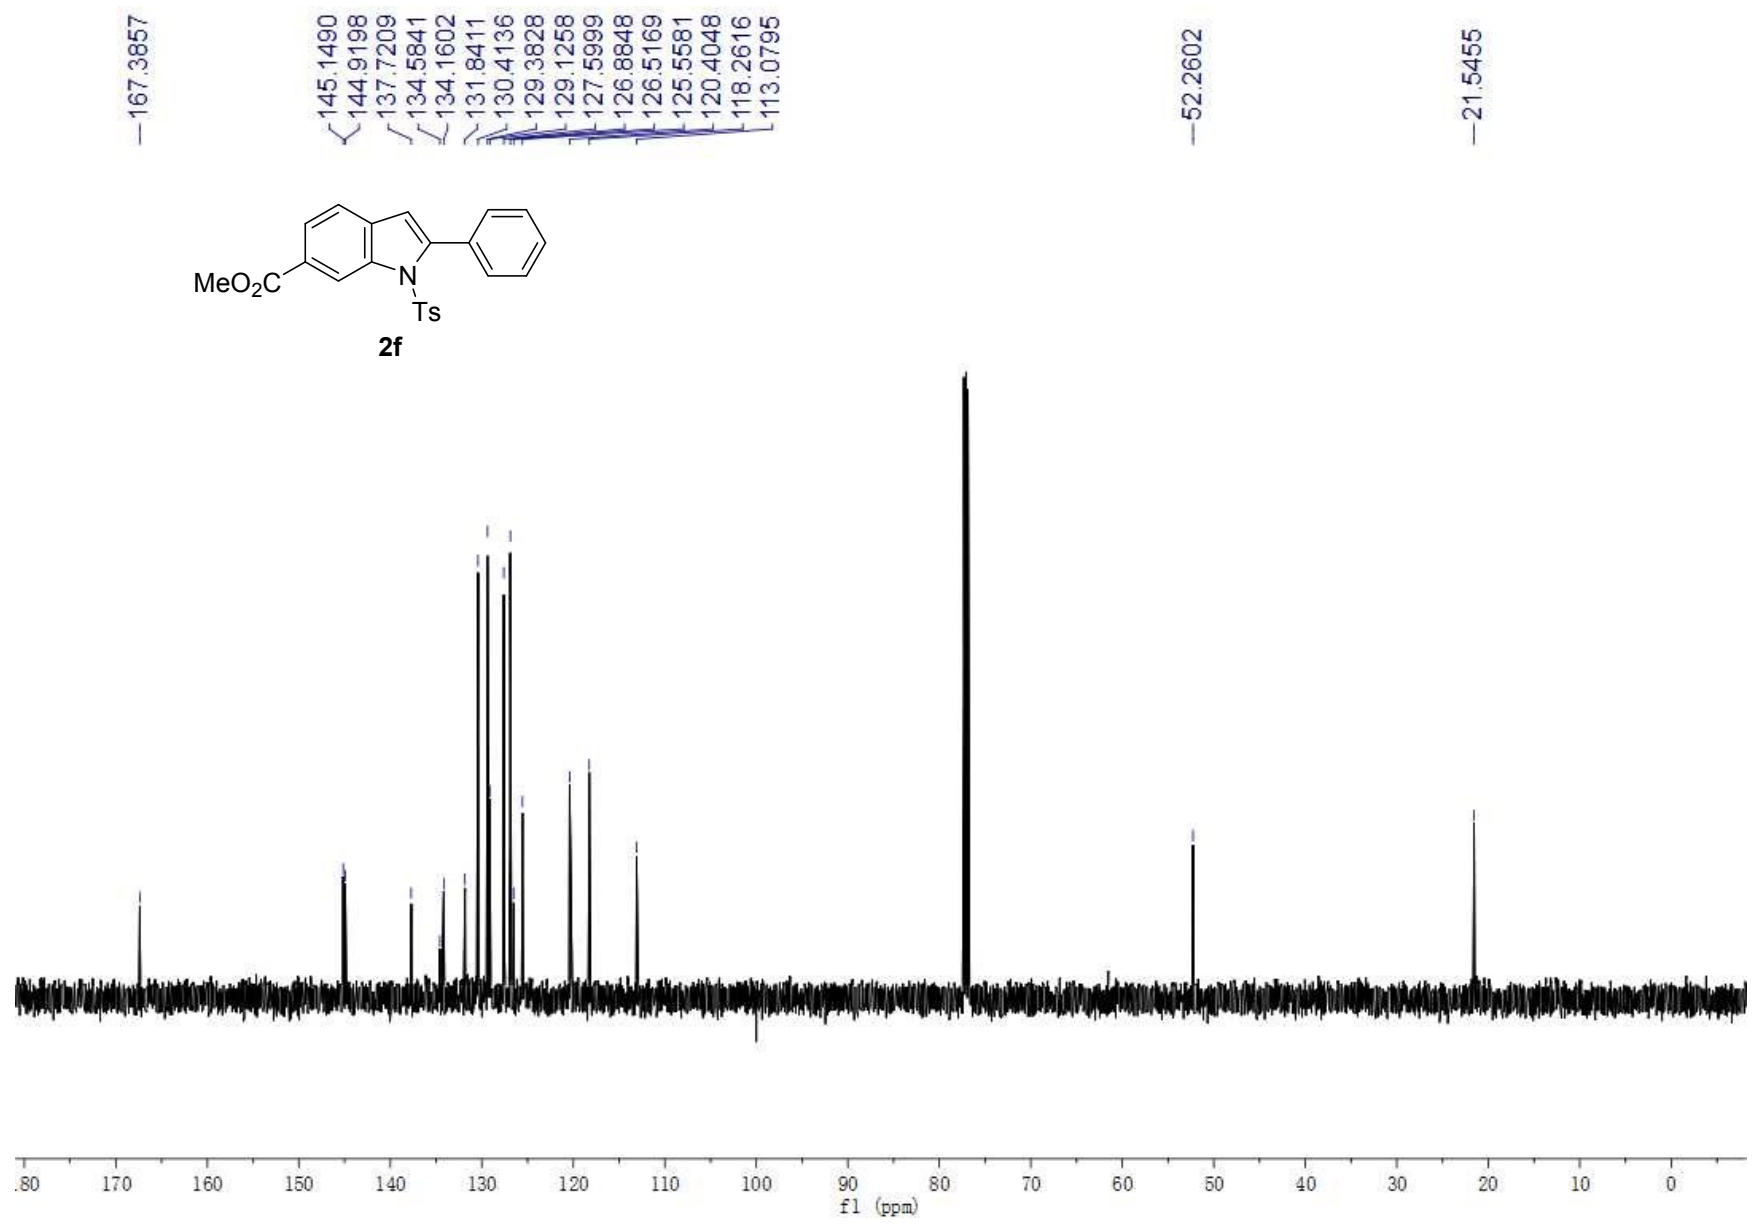

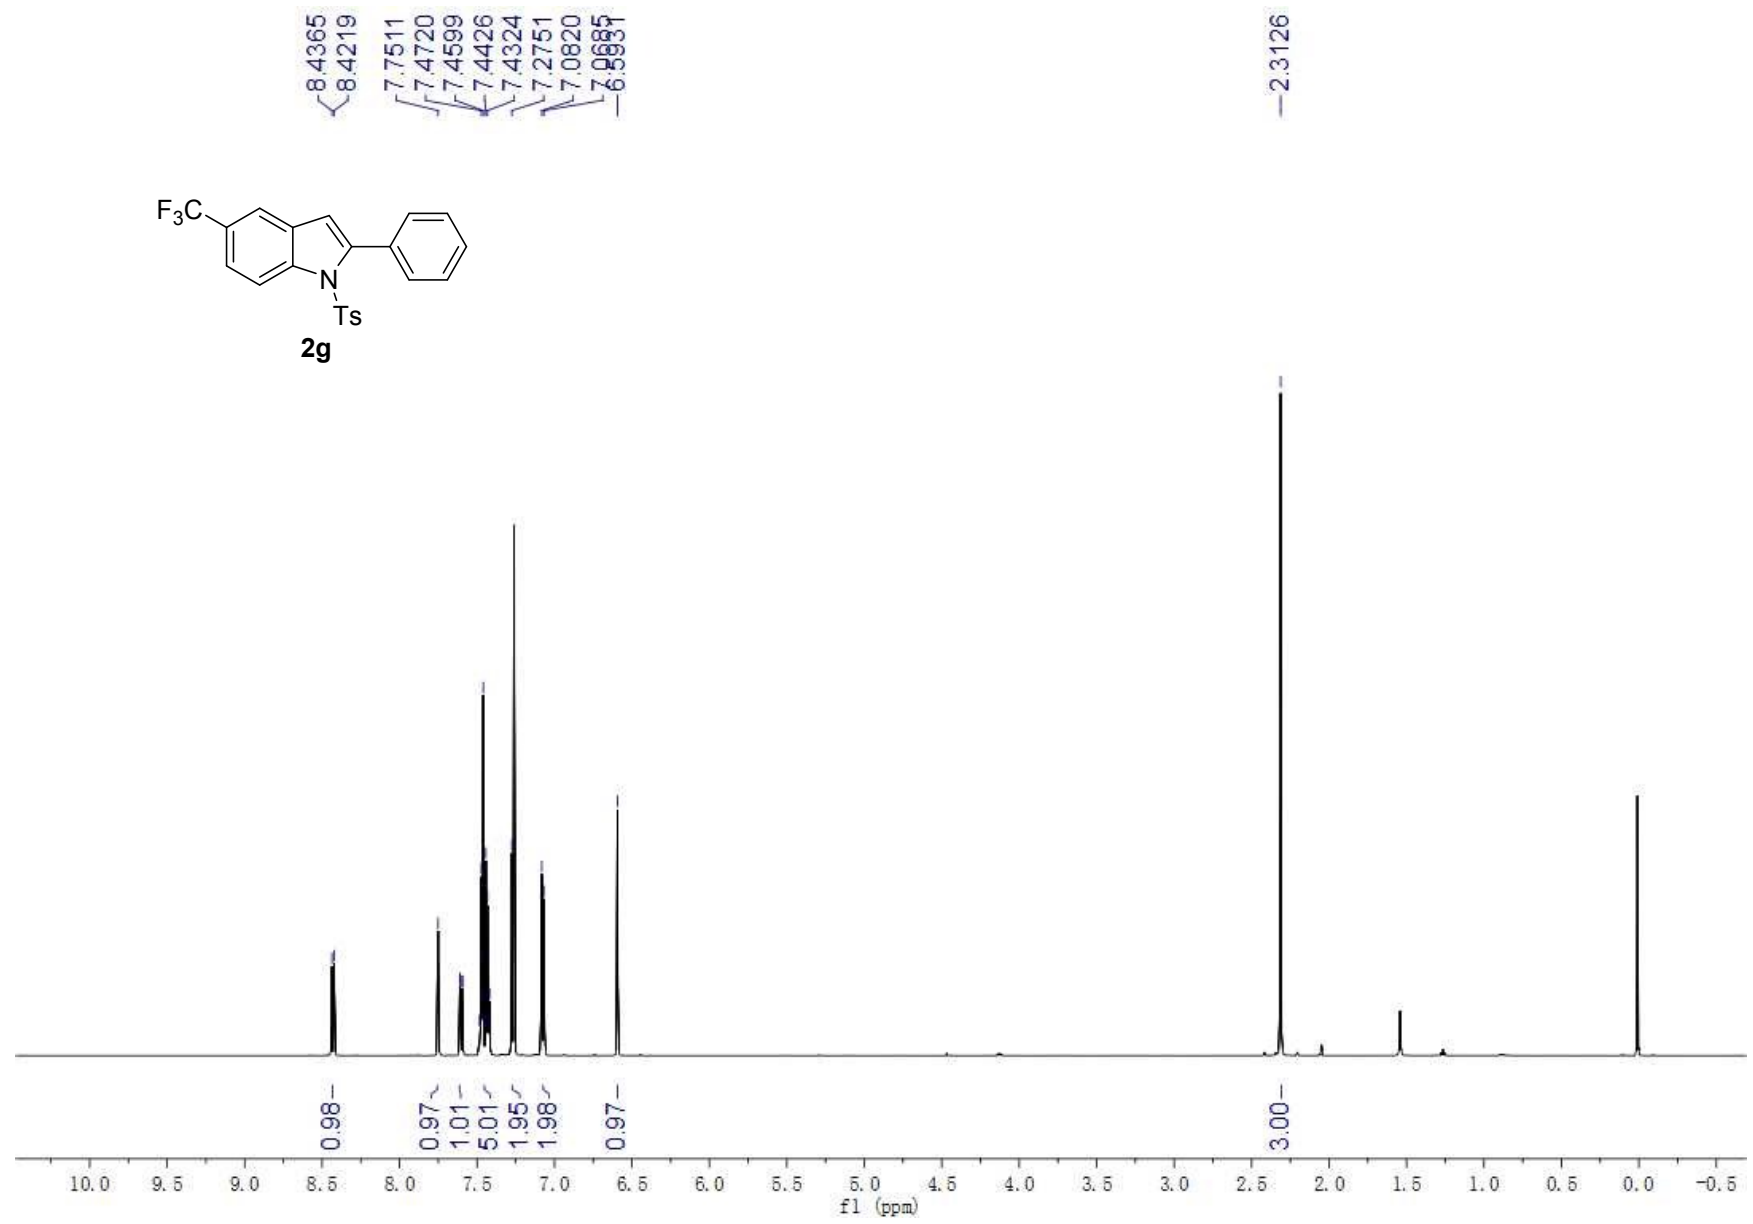

145.0760  
143.7029  
139.6516  
134.7805  
131.6226  
130.5512  
130.0162  
129.4542  
129.1007  
127.5773  
126.8219  
126.6426  
126.4283  
125.4163  
121.3930  
121.3713  
121.3474  
121.3241  
118.1632  
118.1366  
118.1093  
118.0821  
116.6724  
112.7006

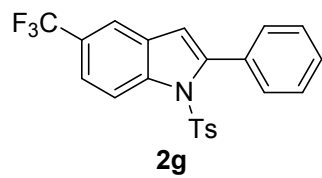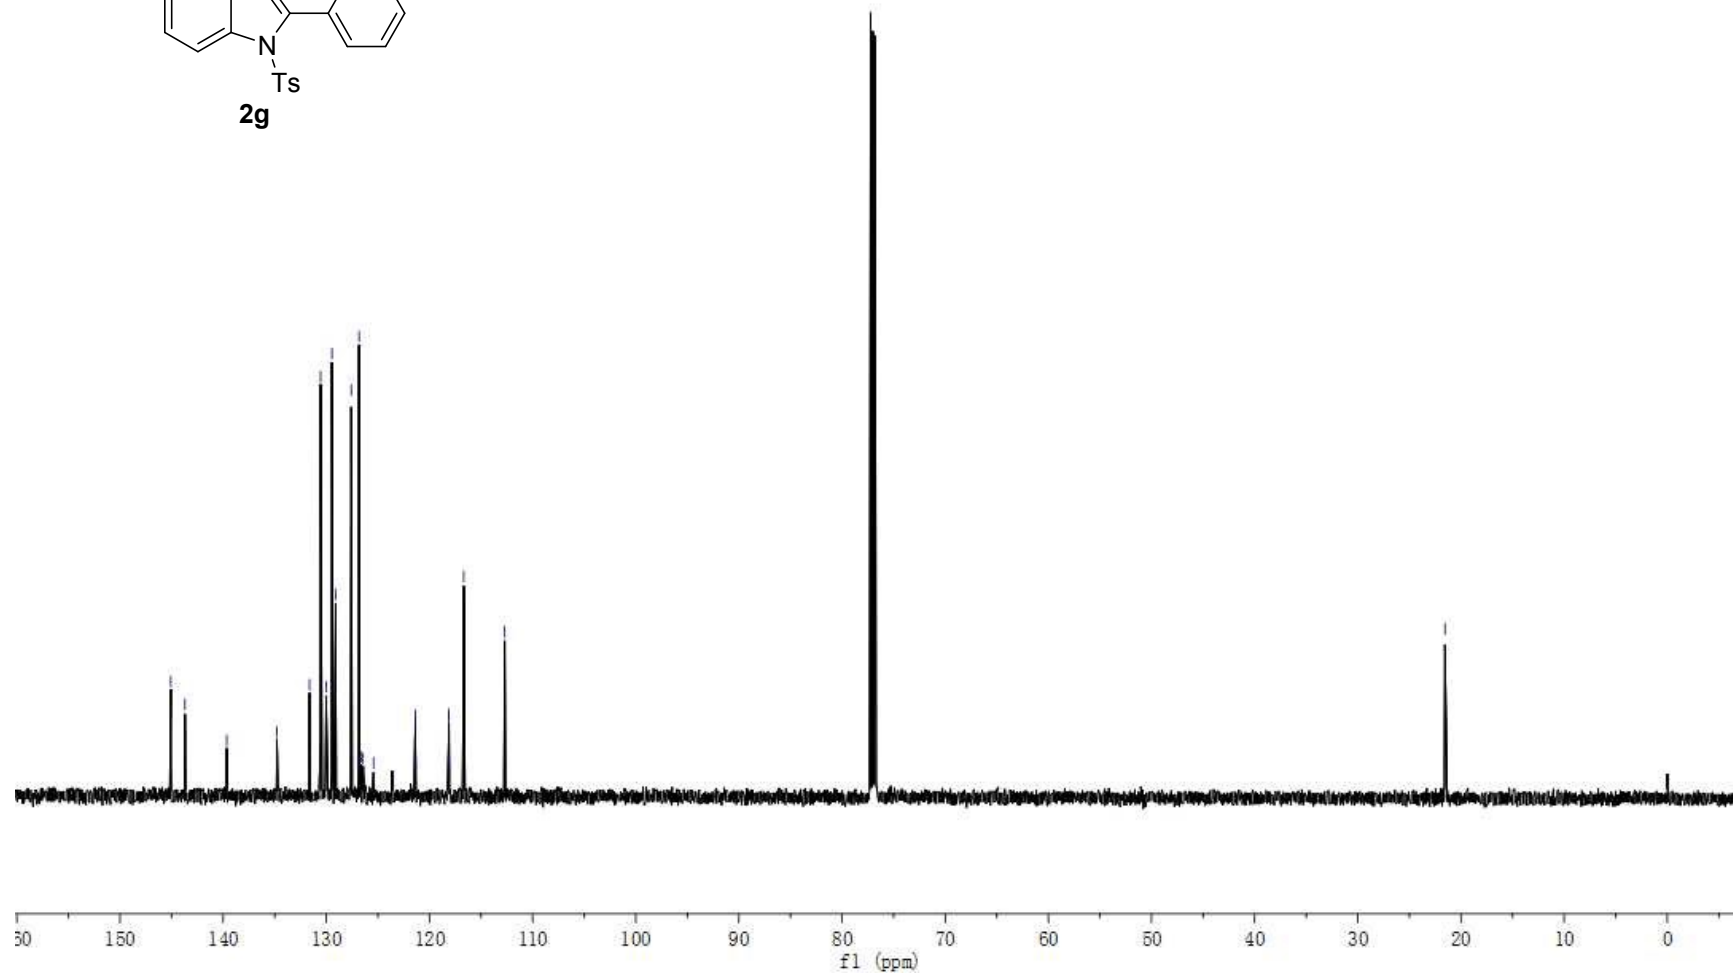

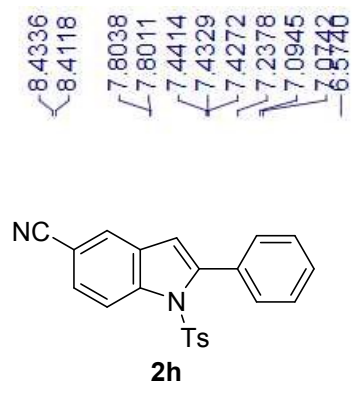

-2.3216

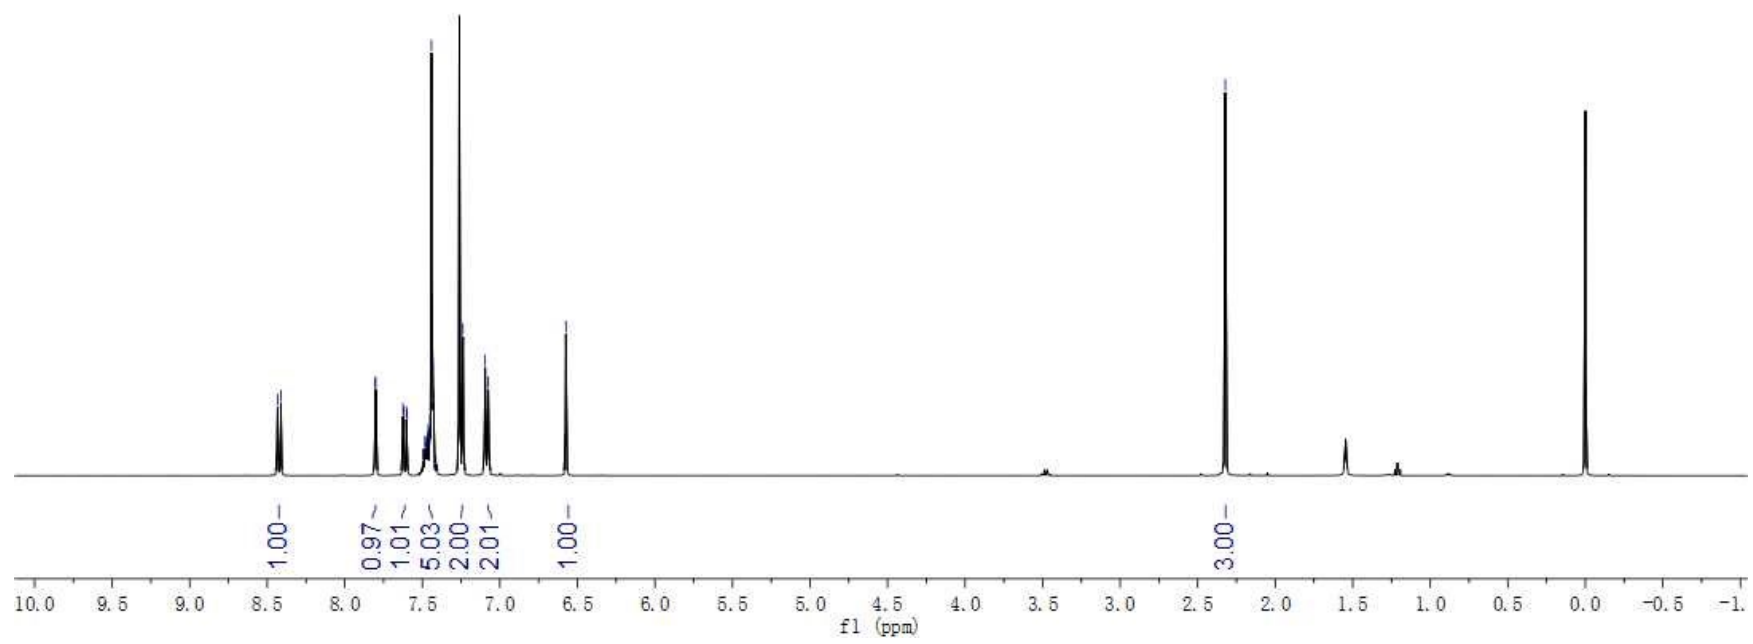

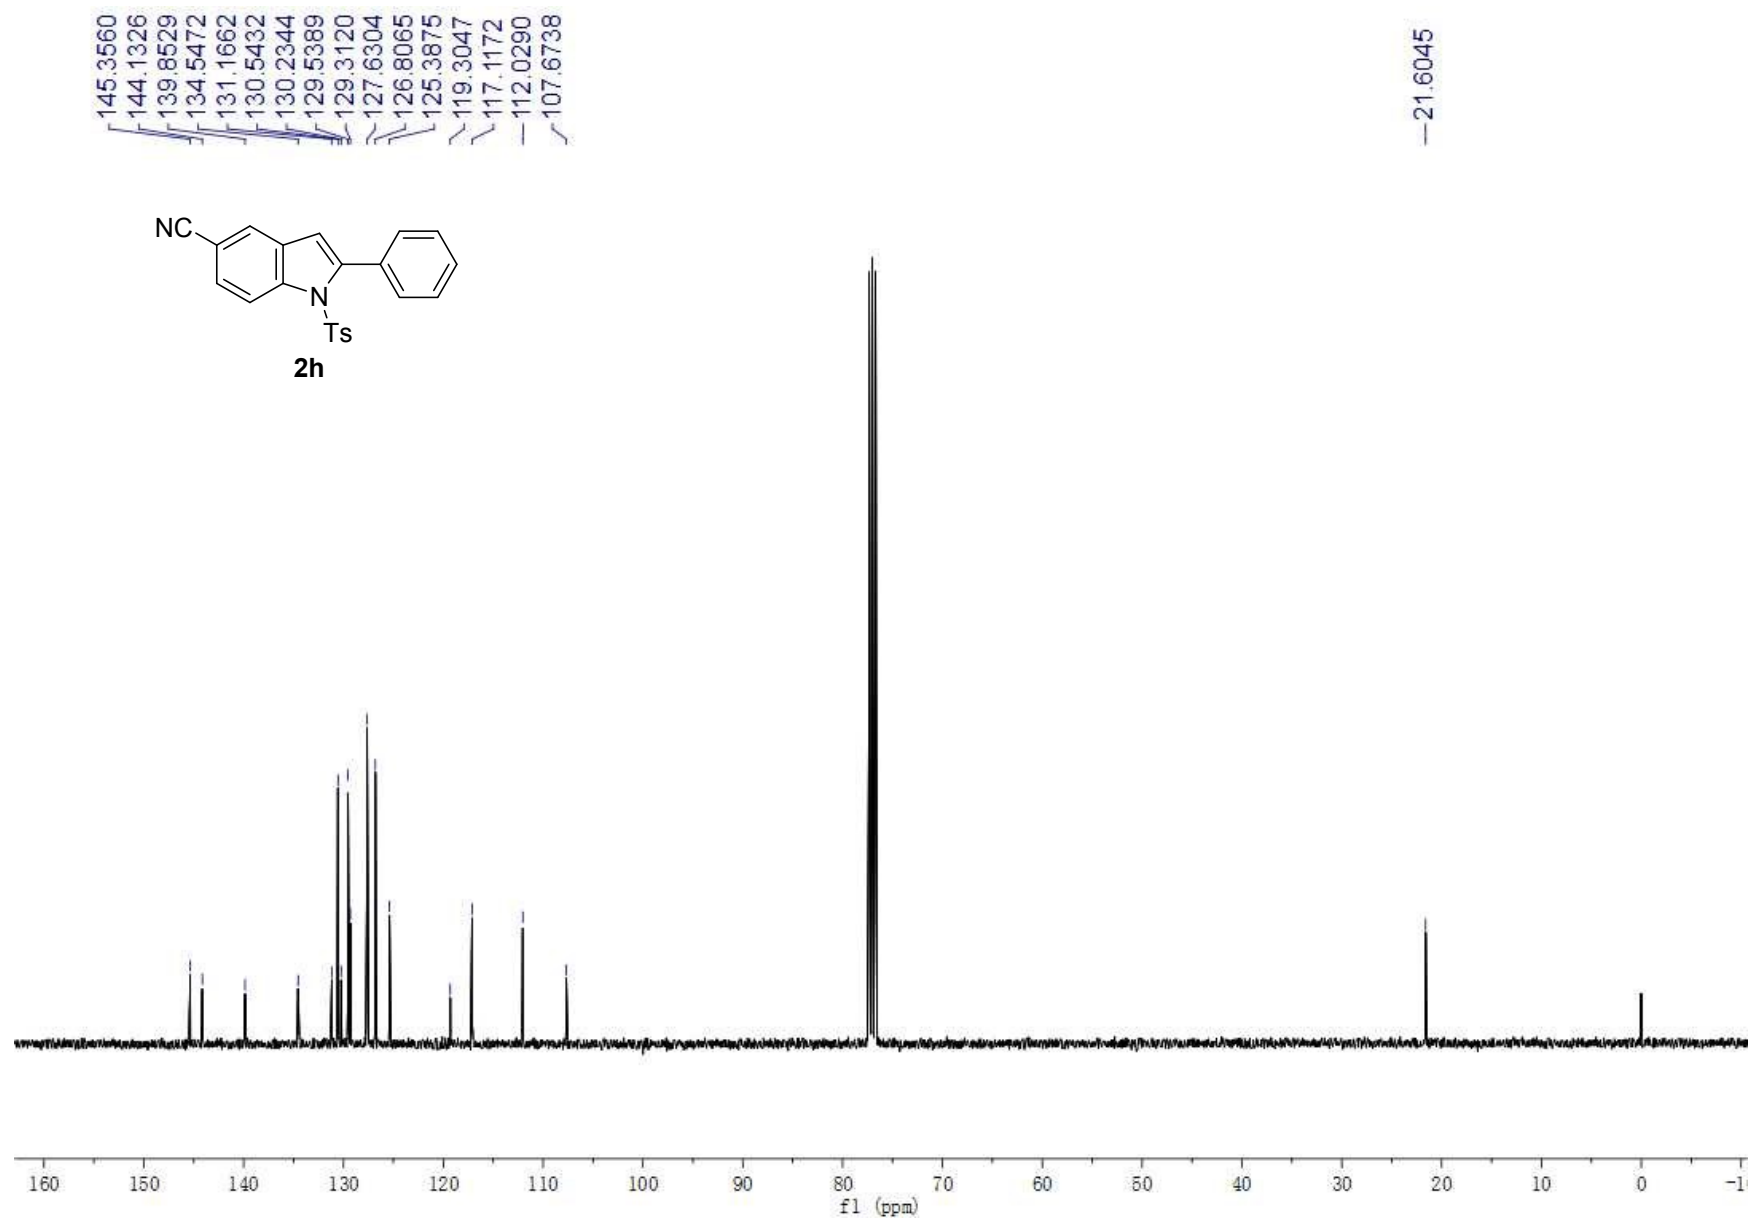

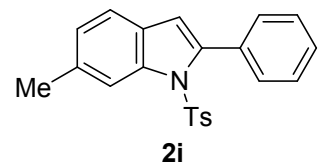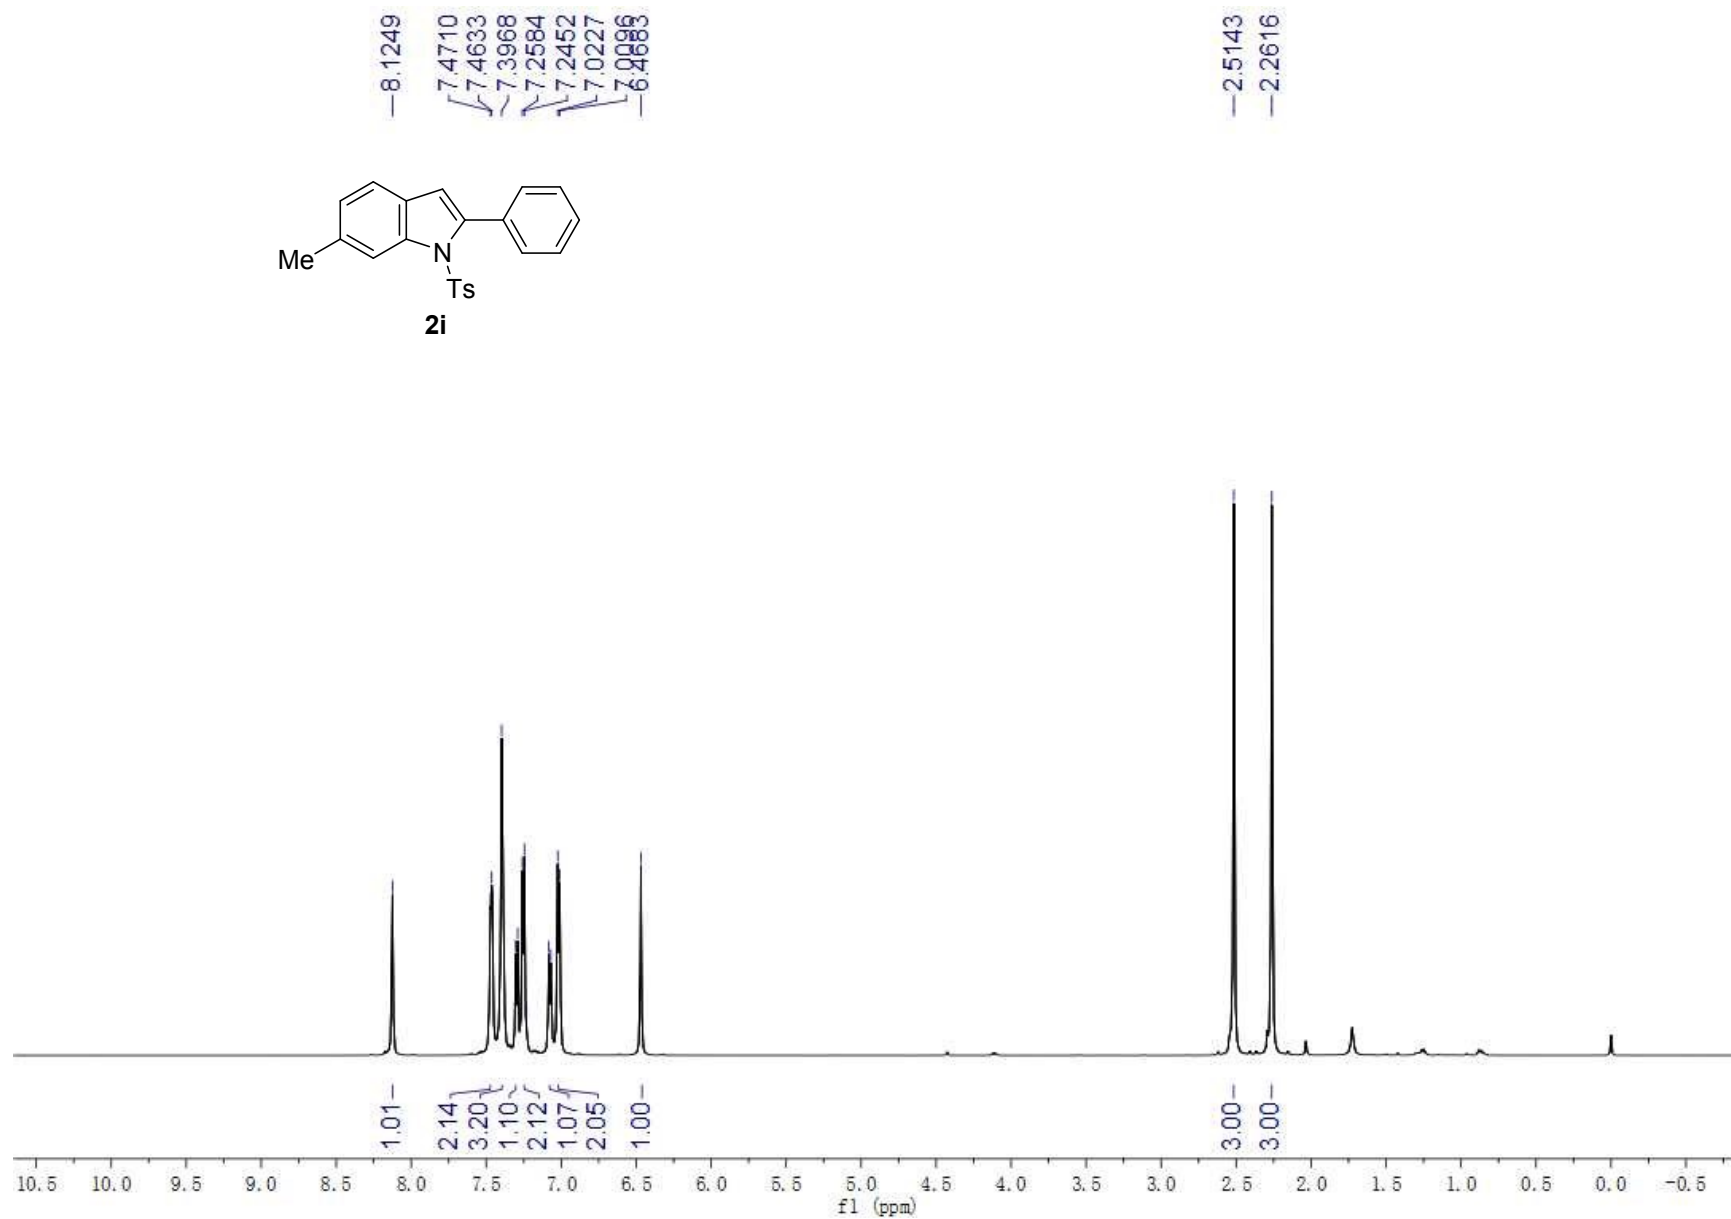



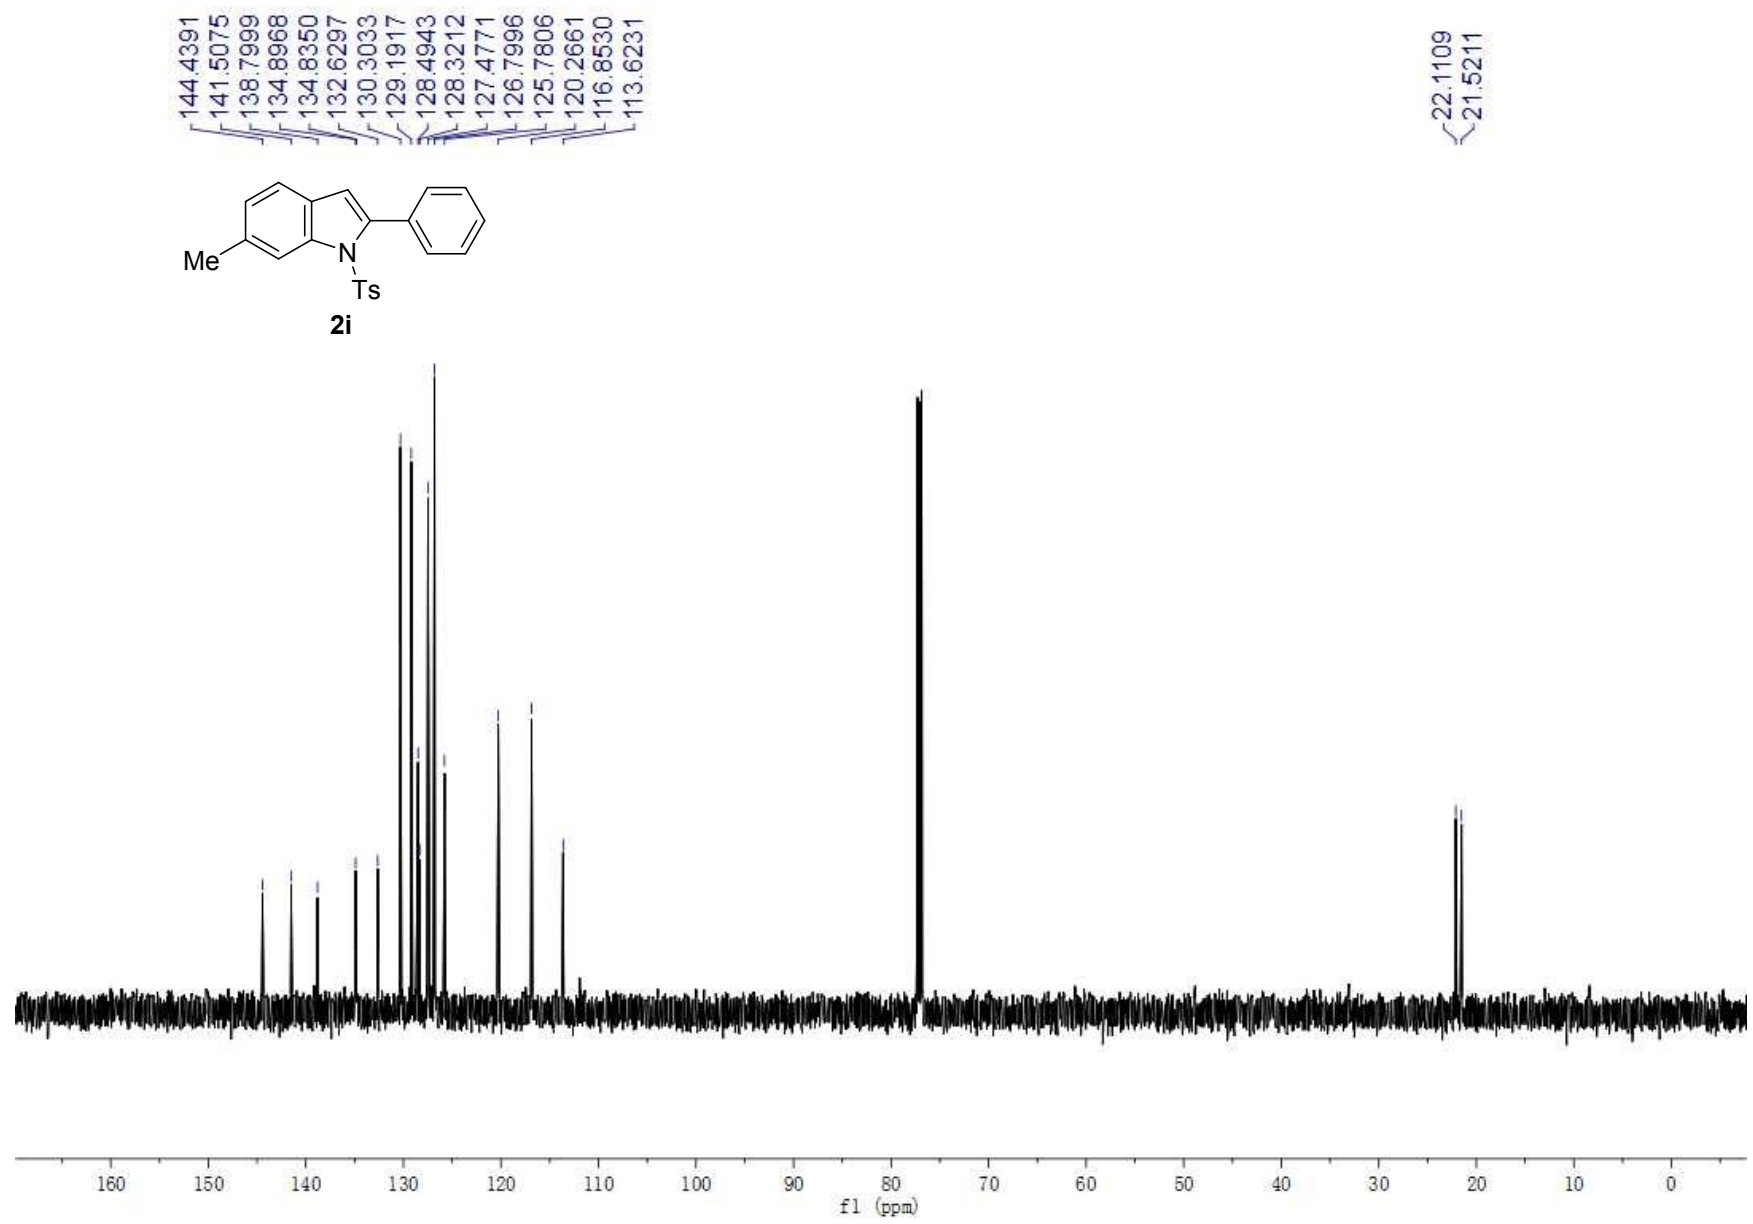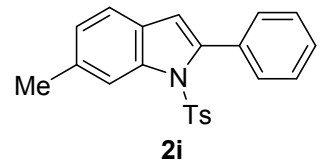

8.1845  
8.1632  
7.4299  
7.4248  
7.4167  
7.2737  
7.2531  
7.0447  
6.9249

2.4136  
2.2831

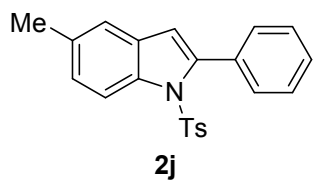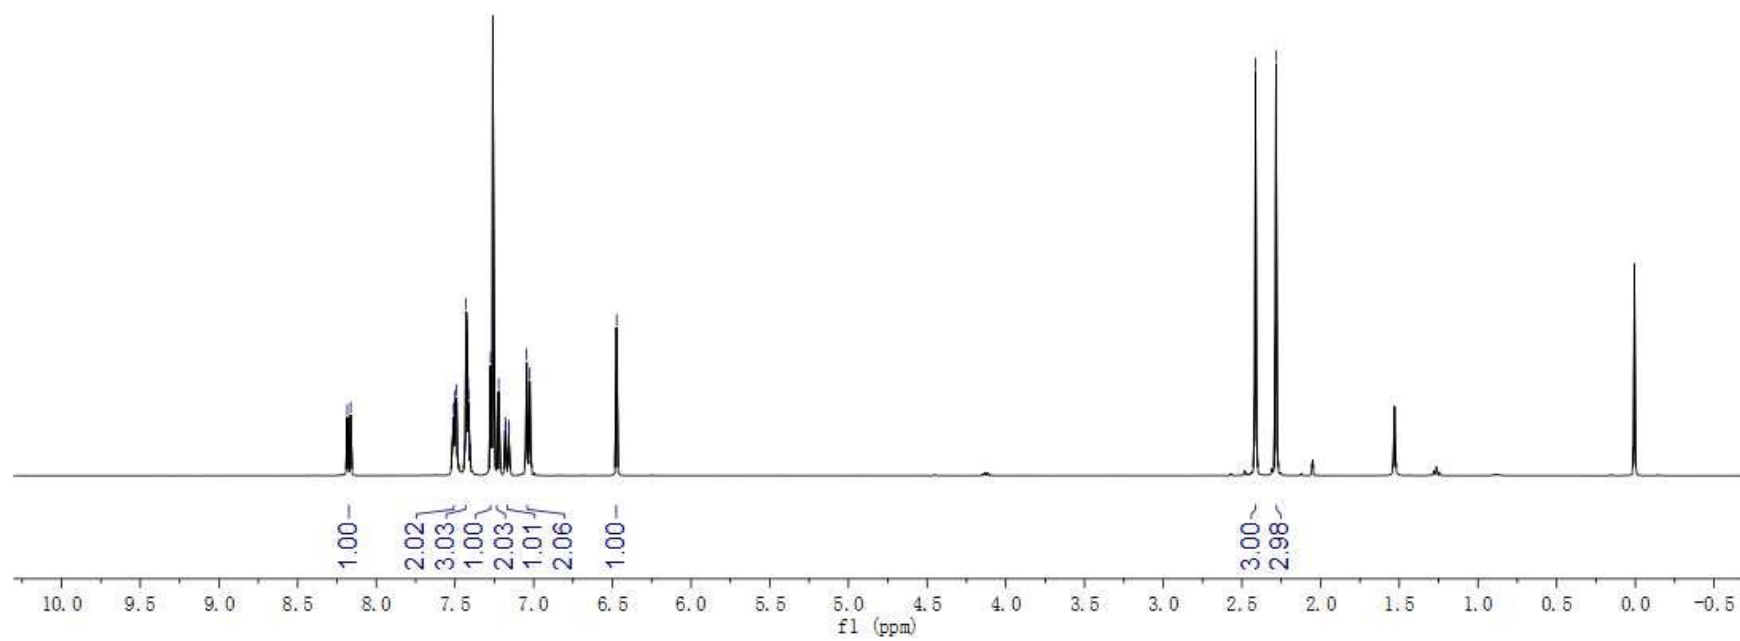

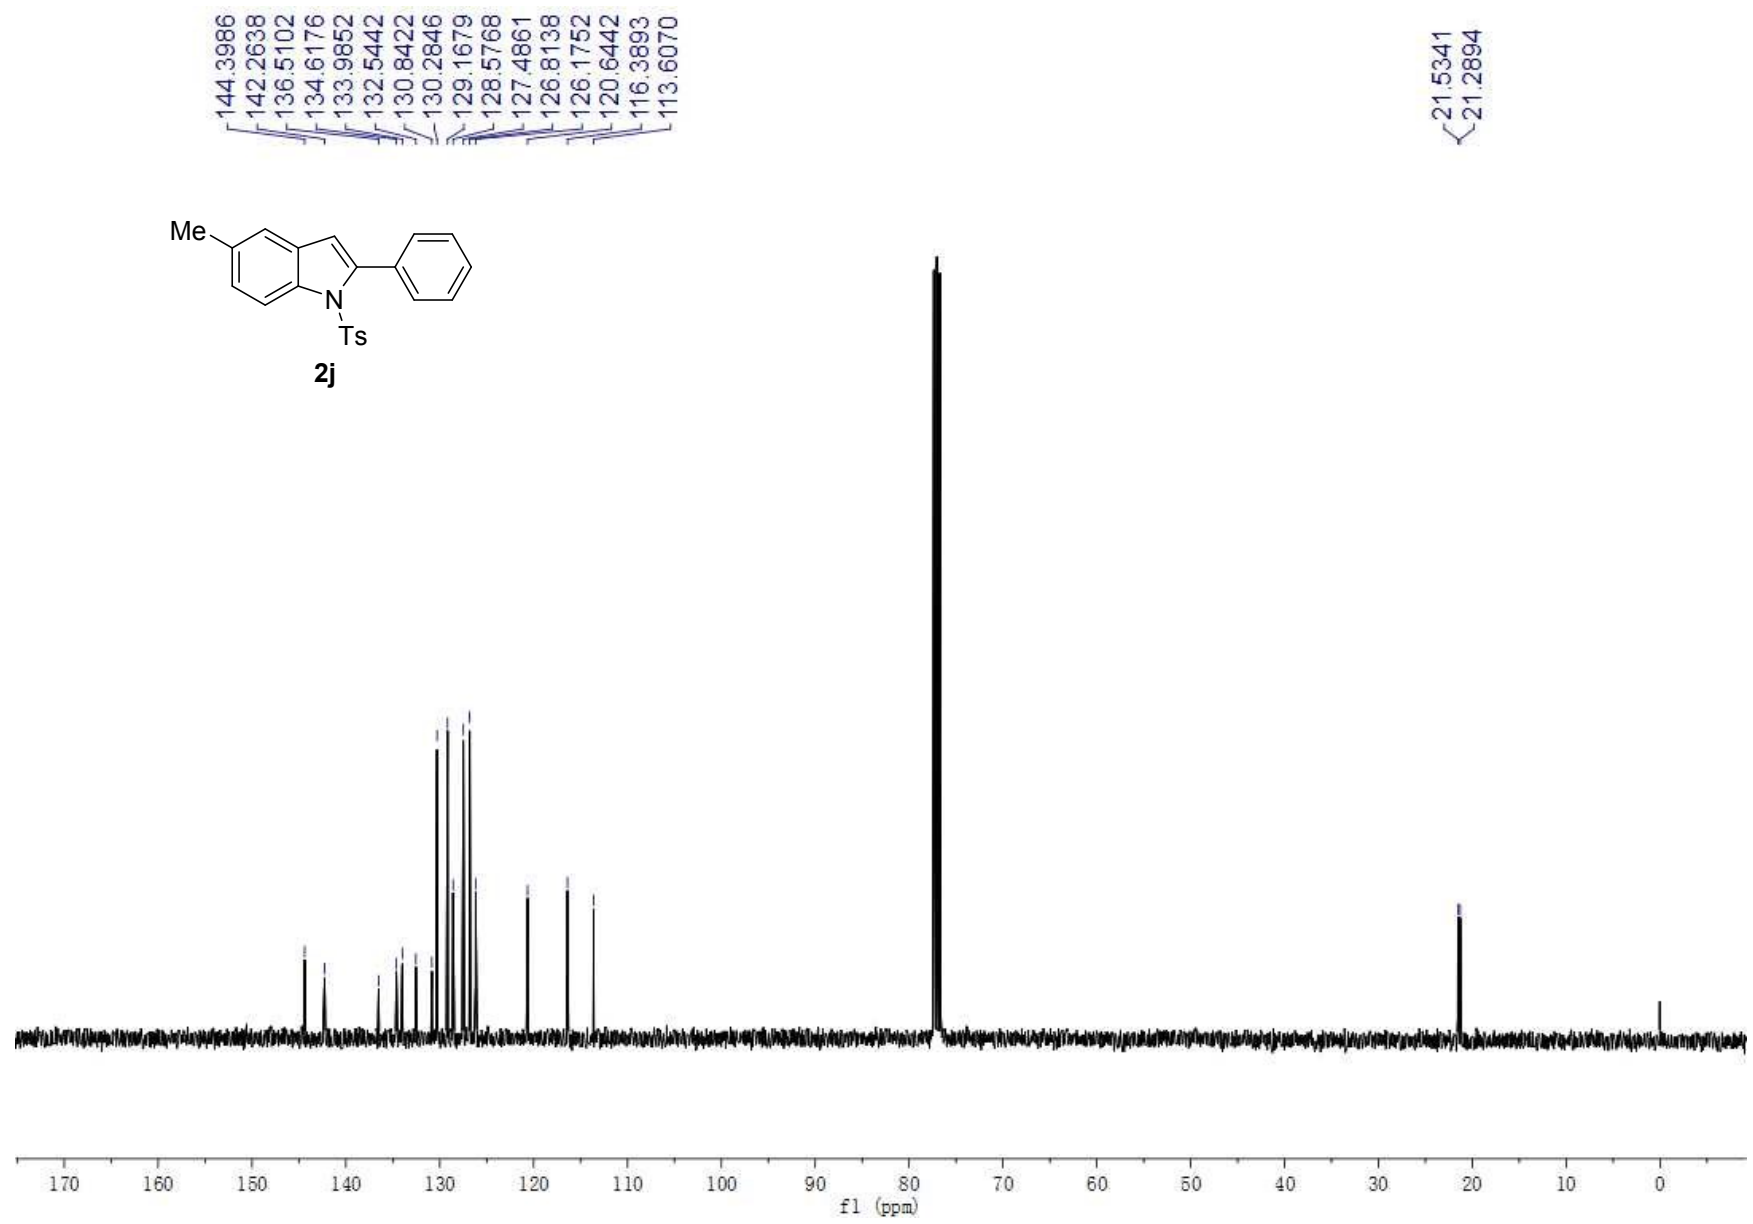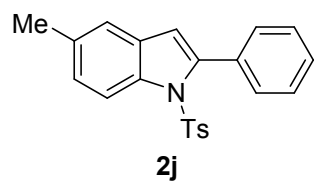

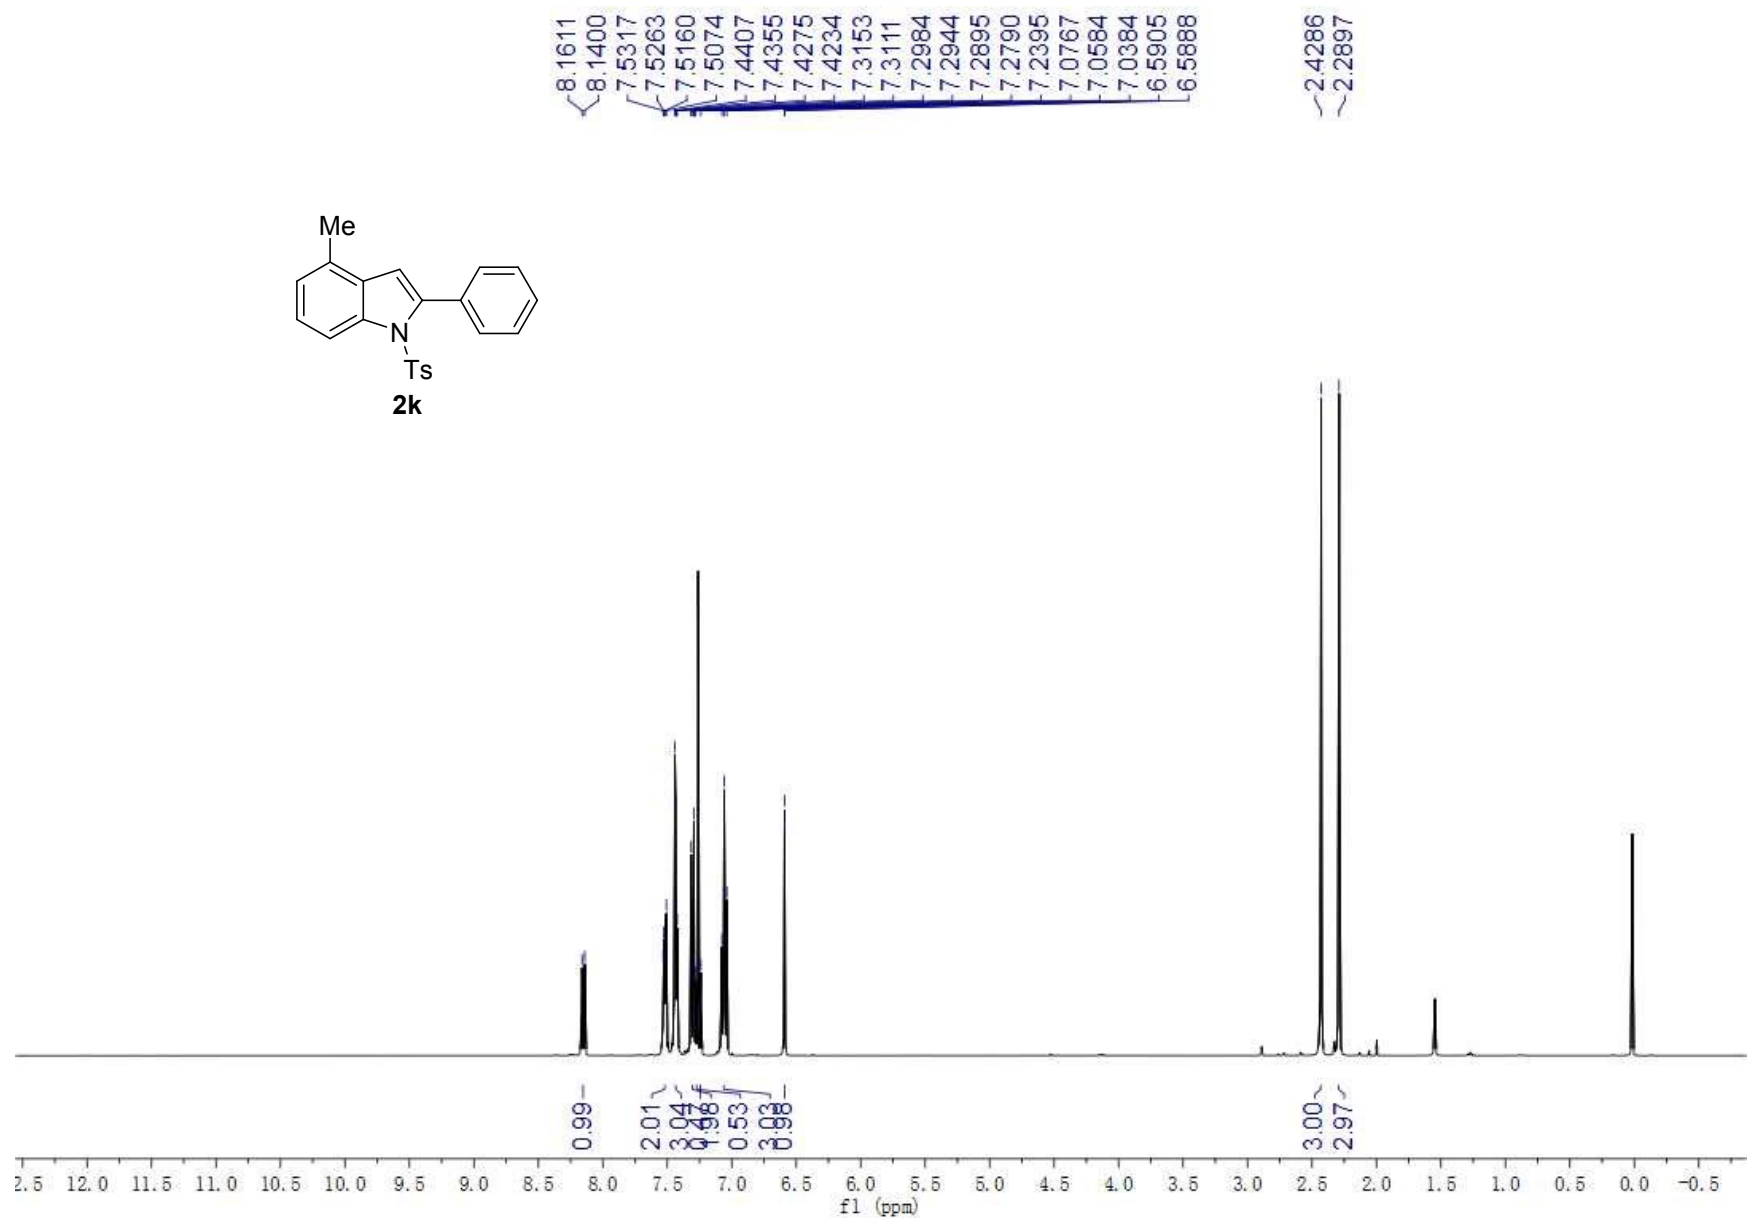

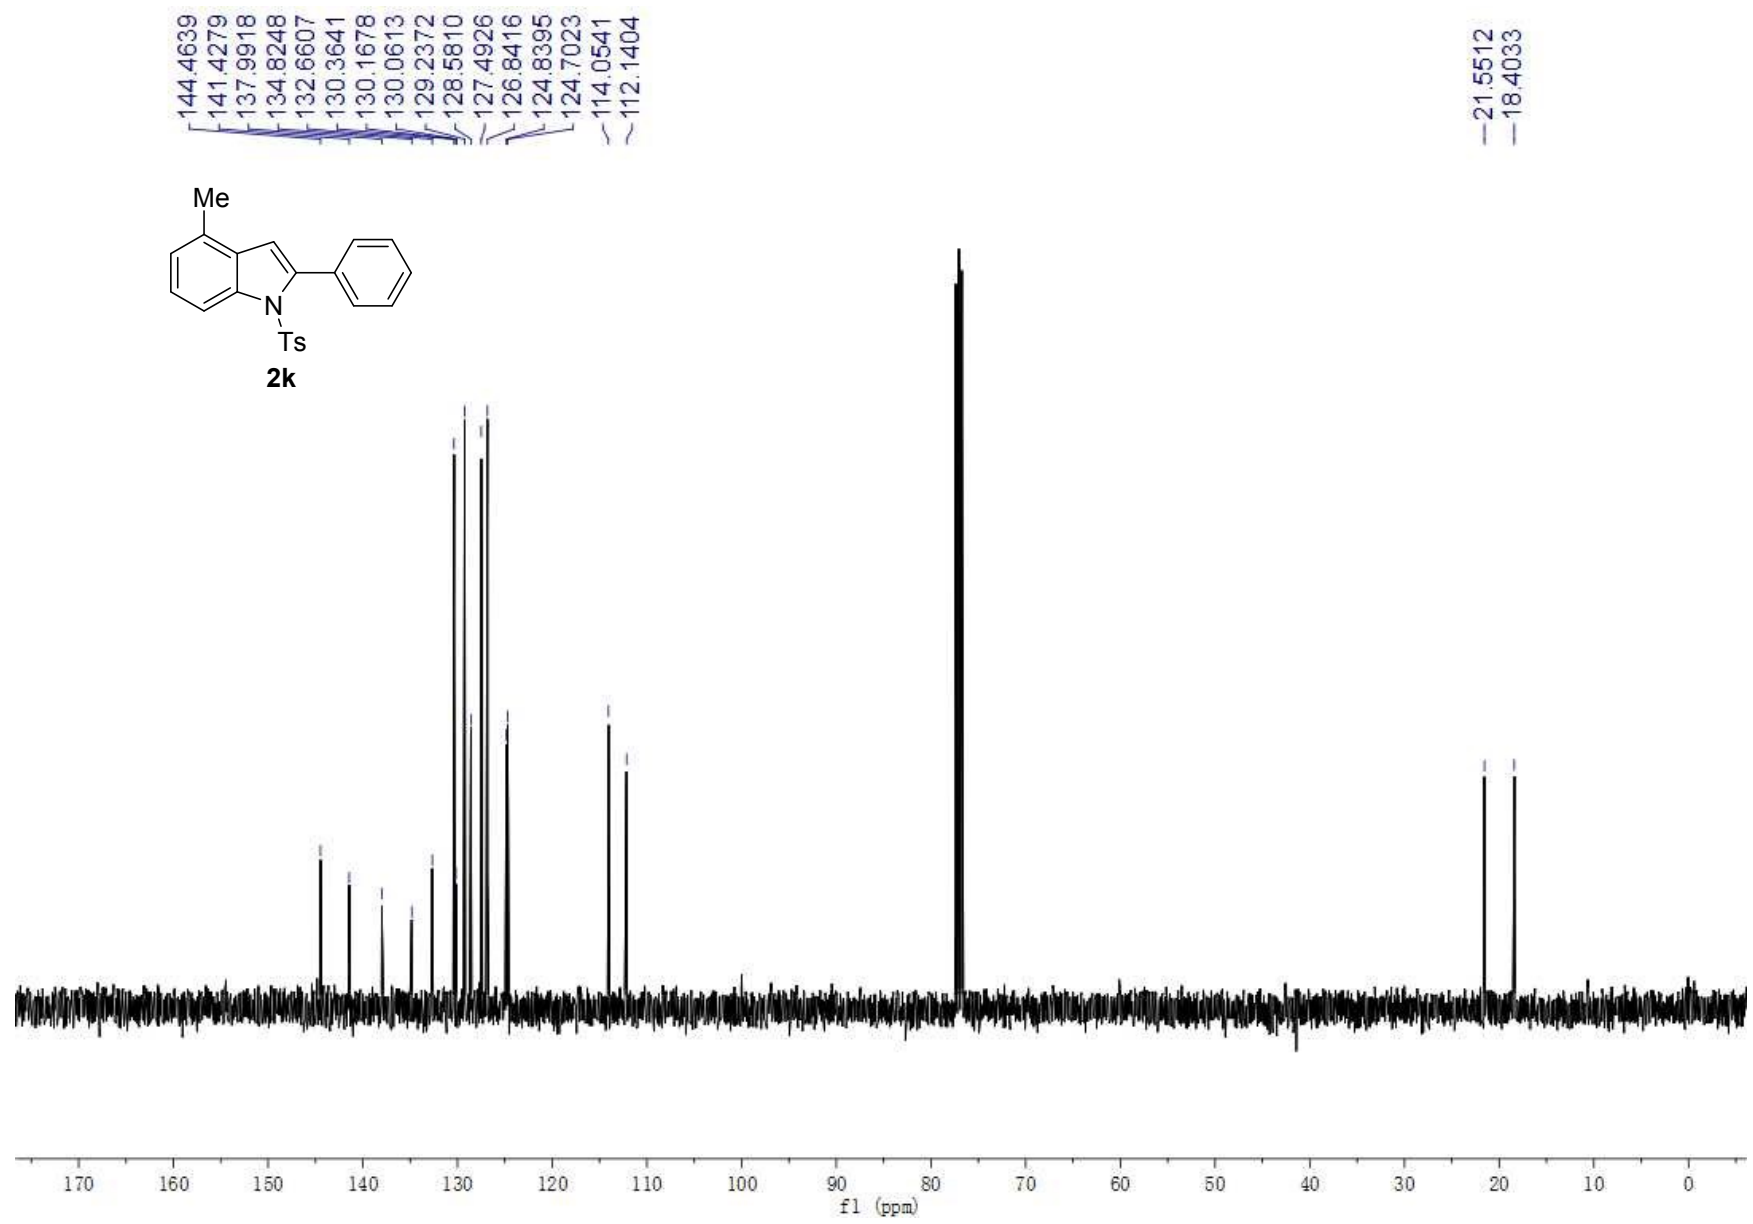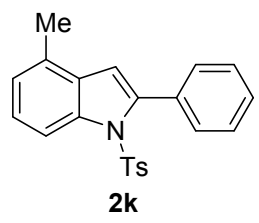

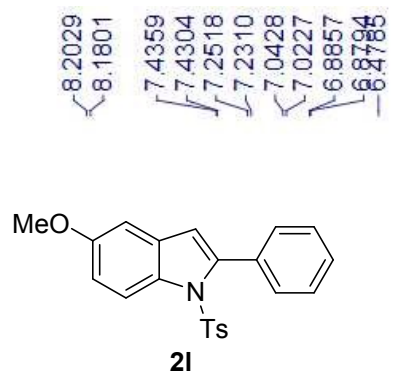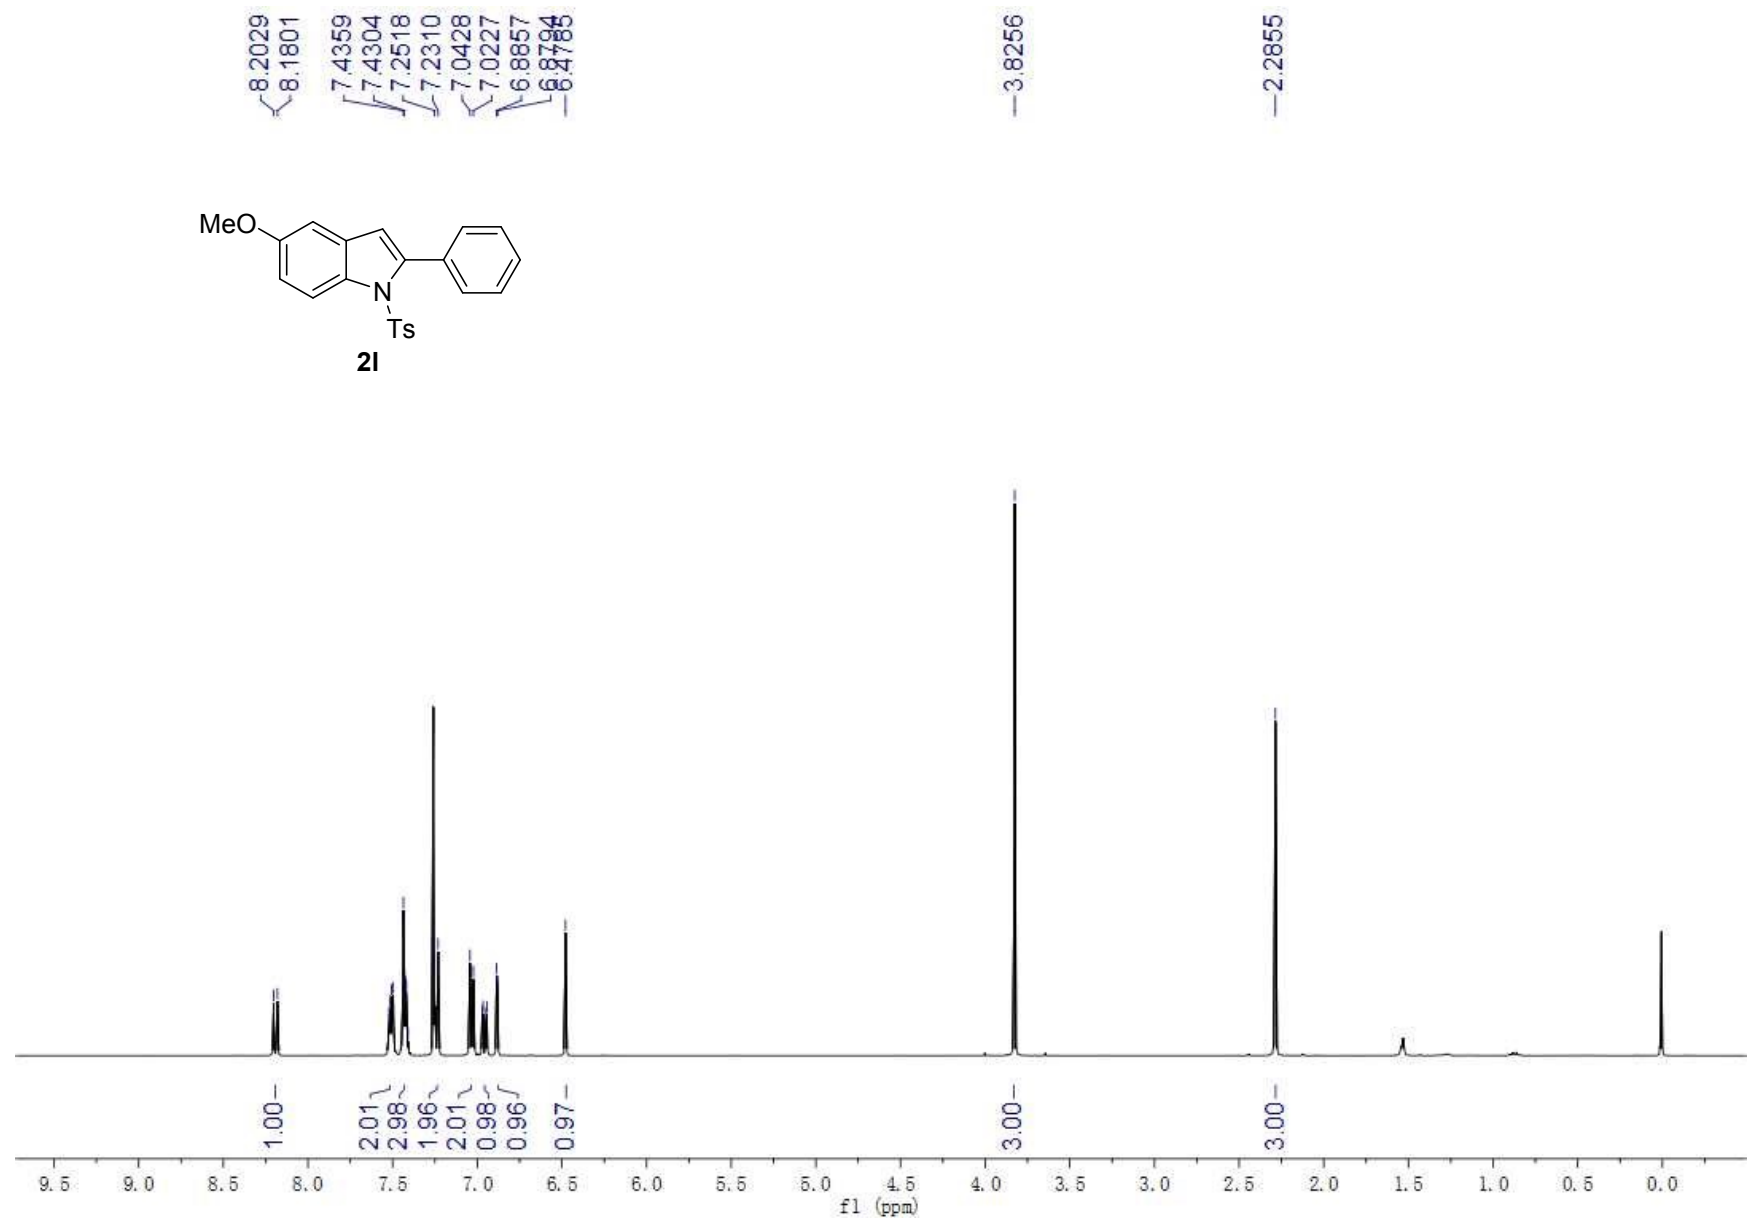

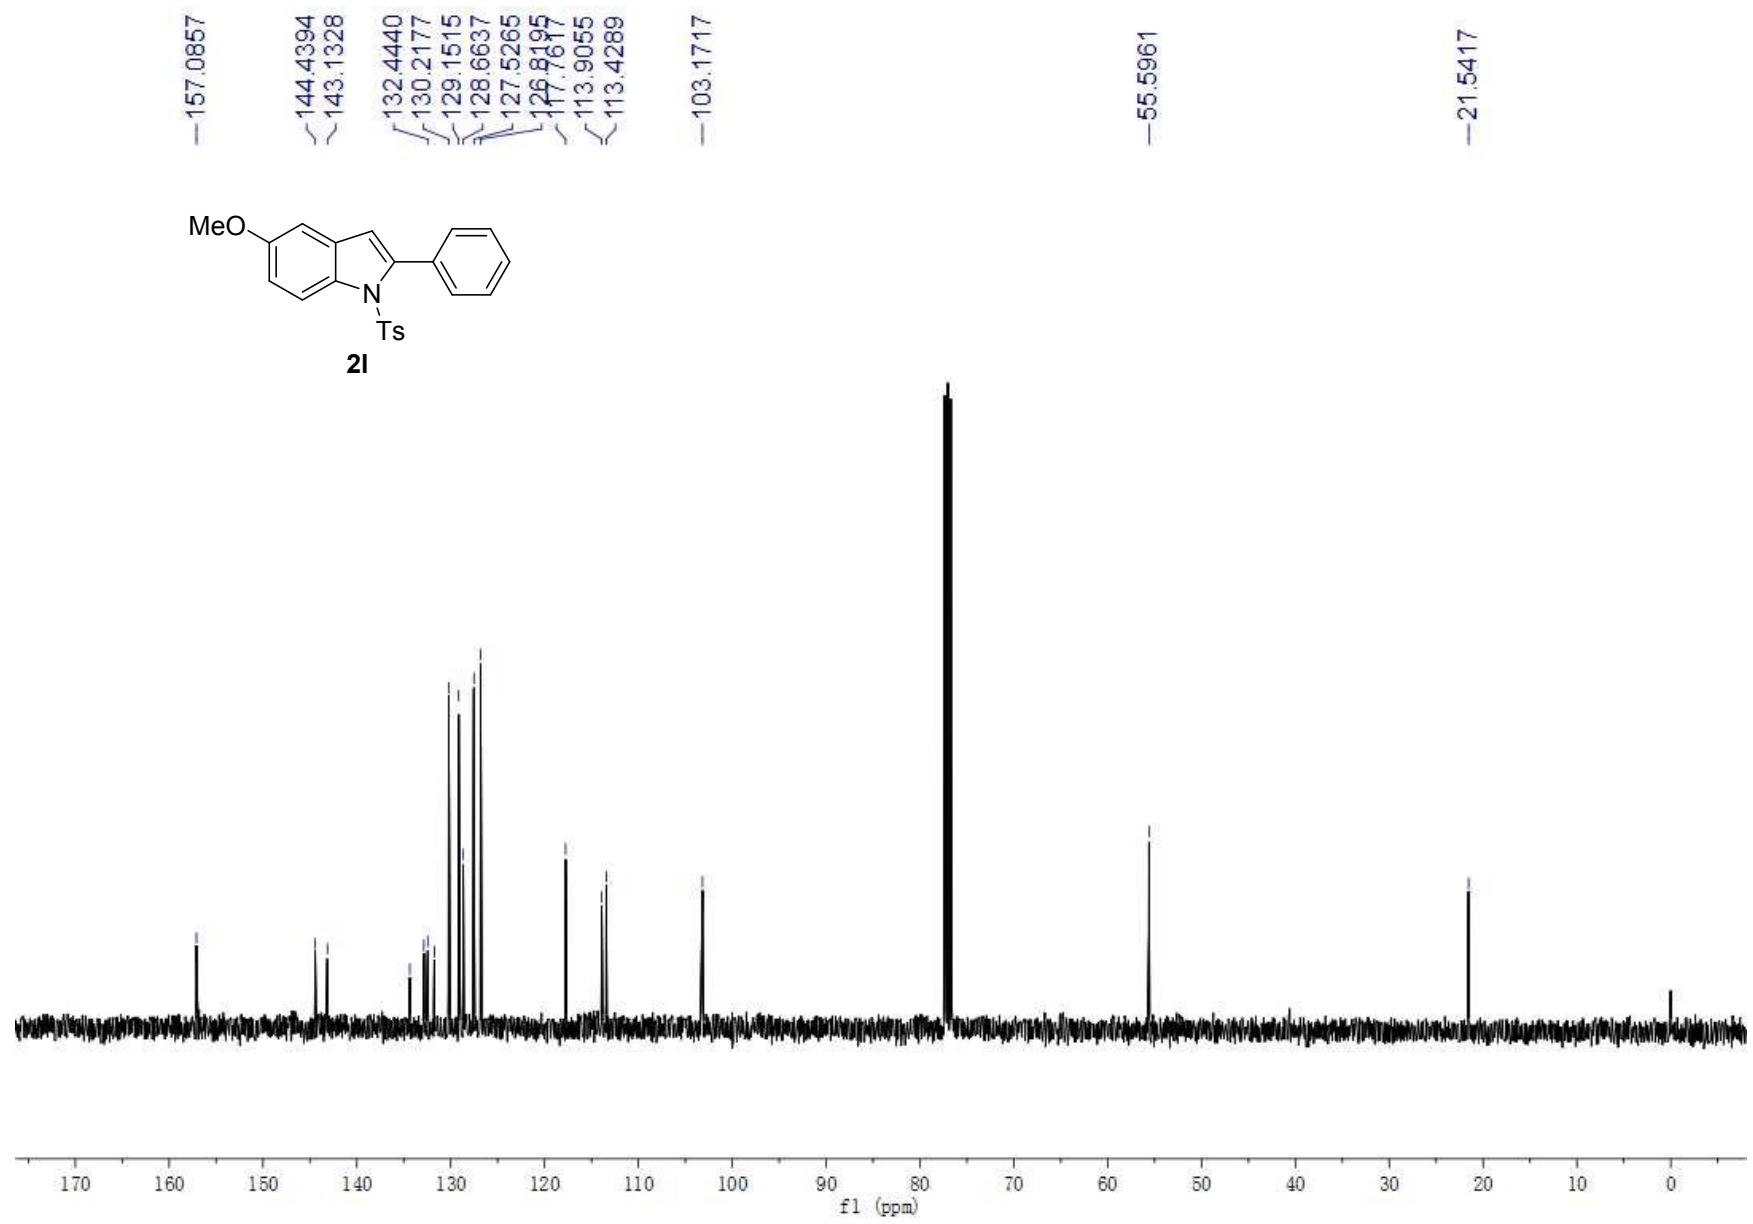

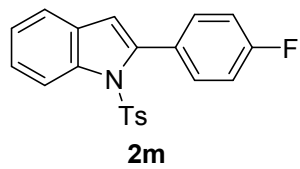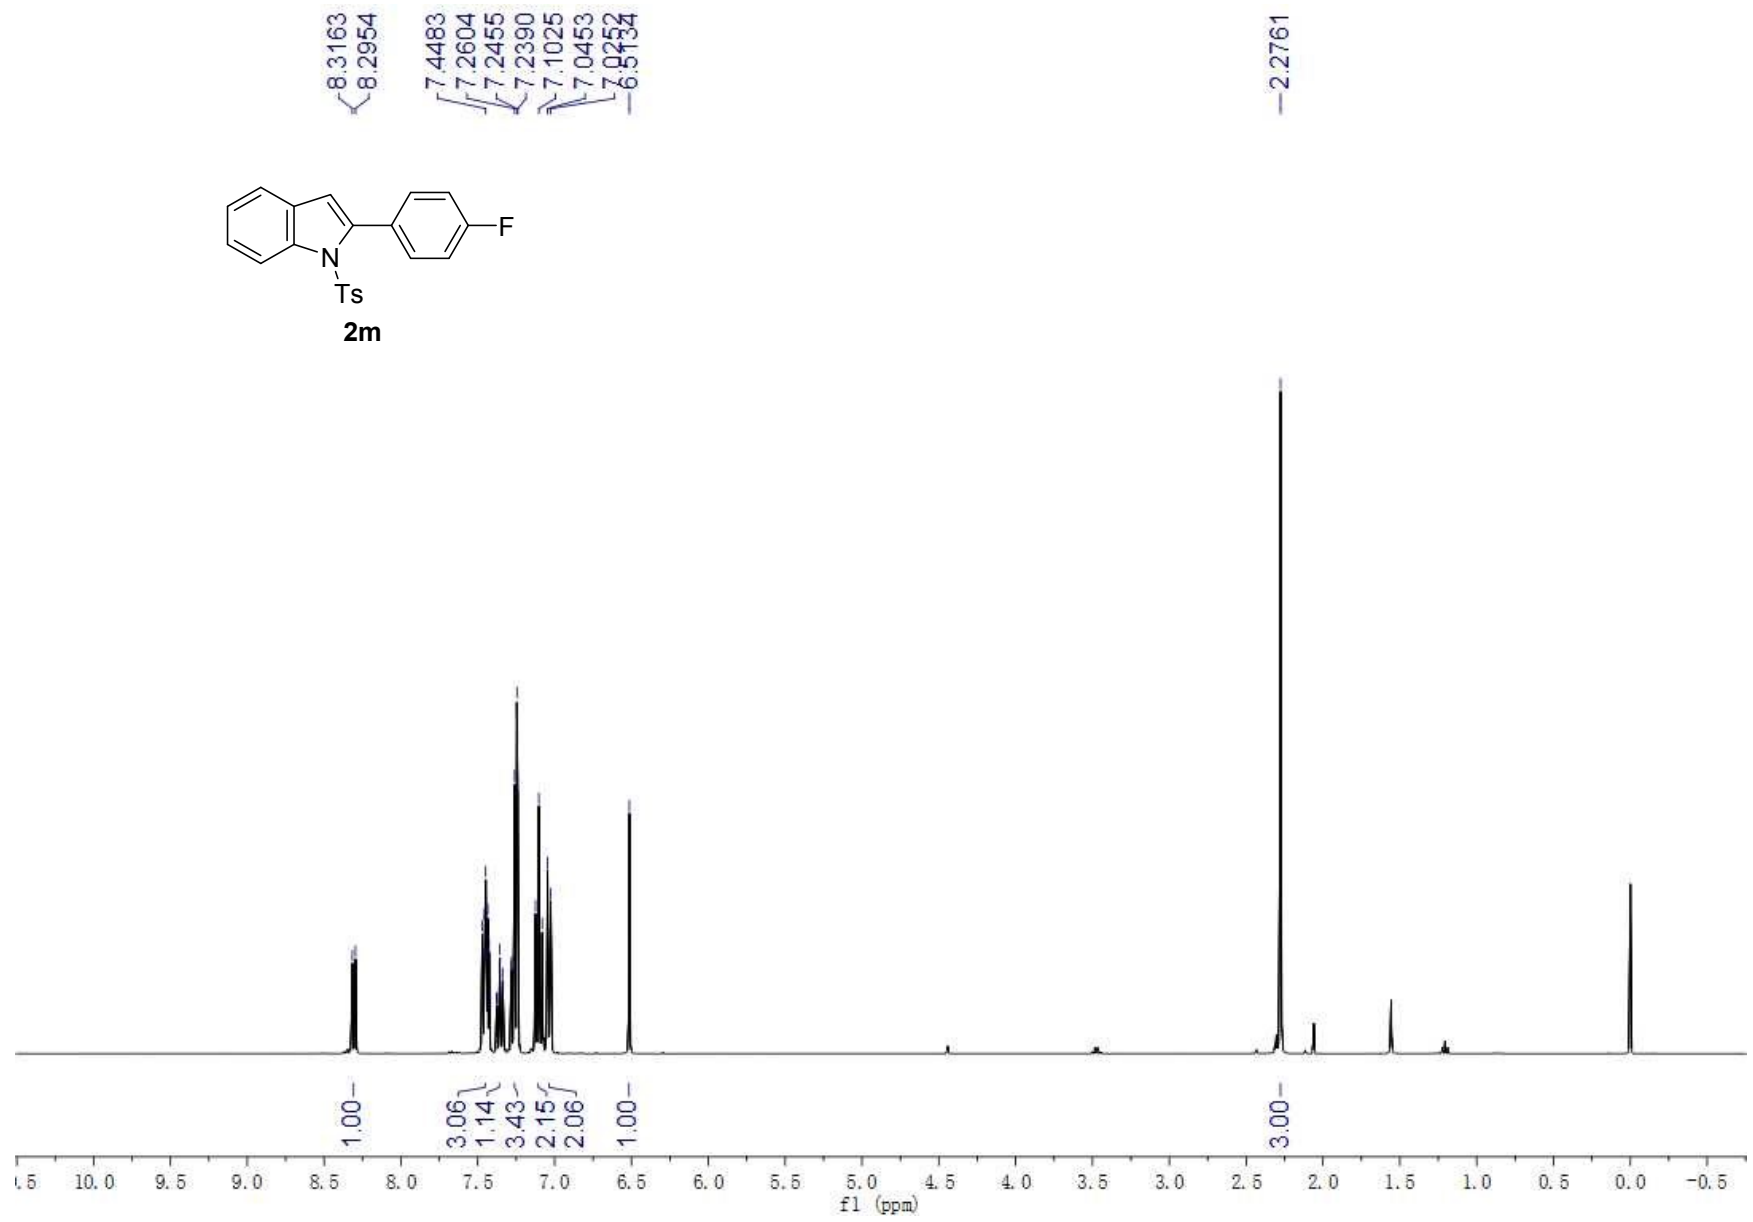



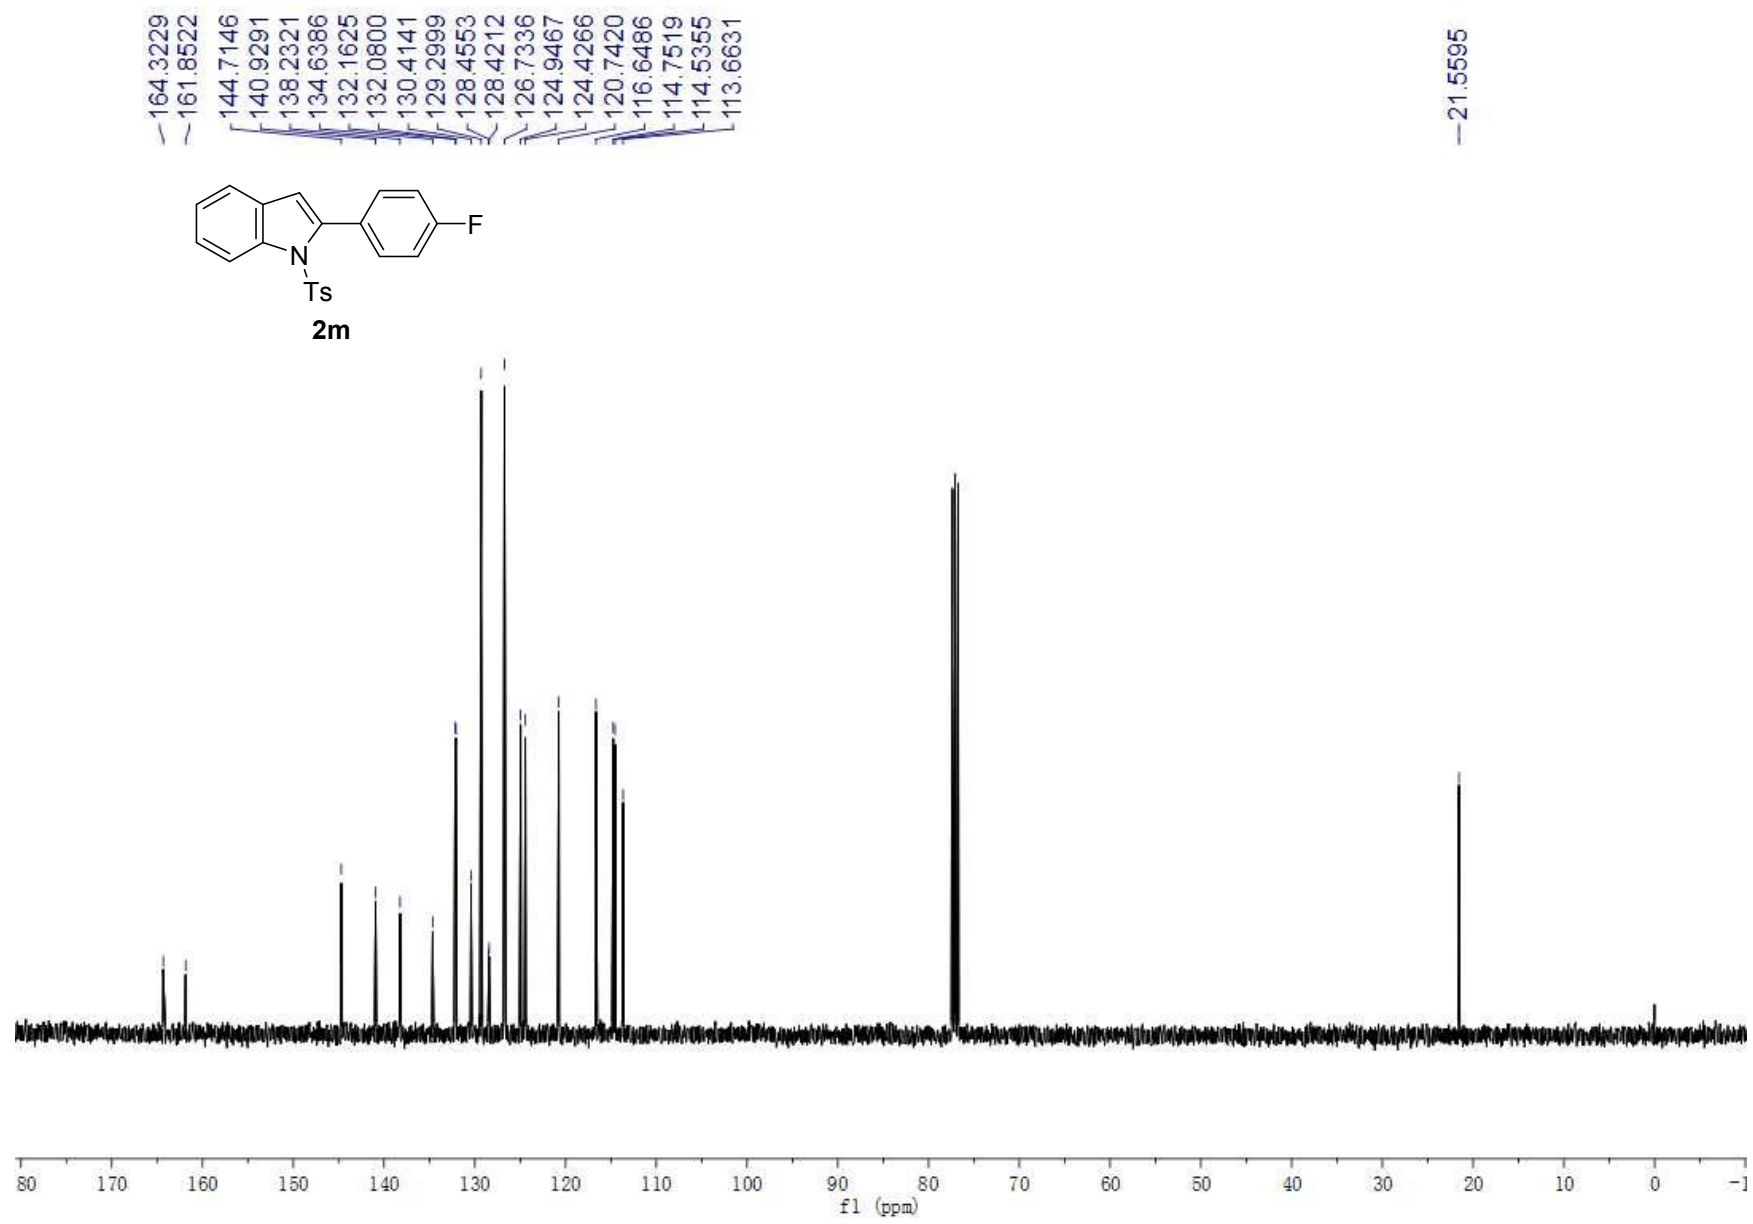

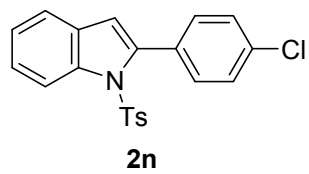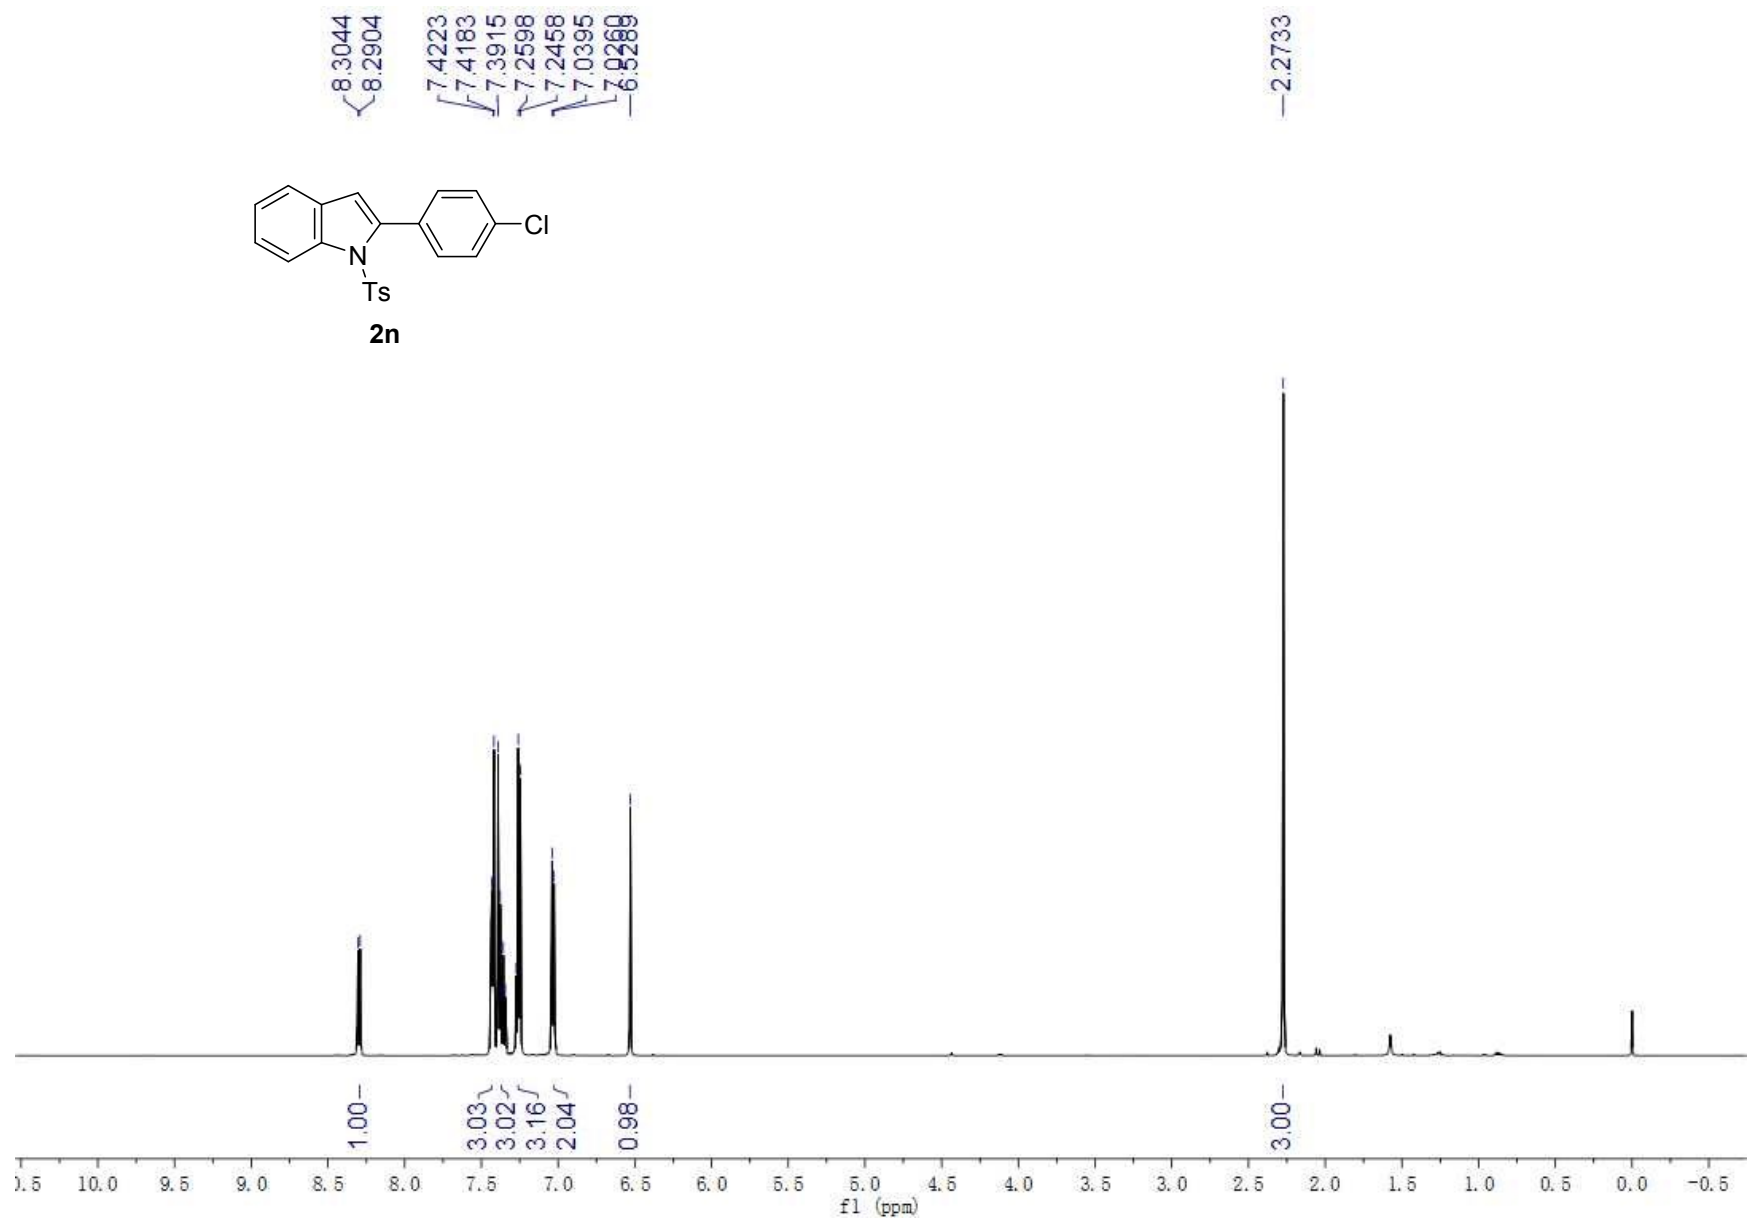

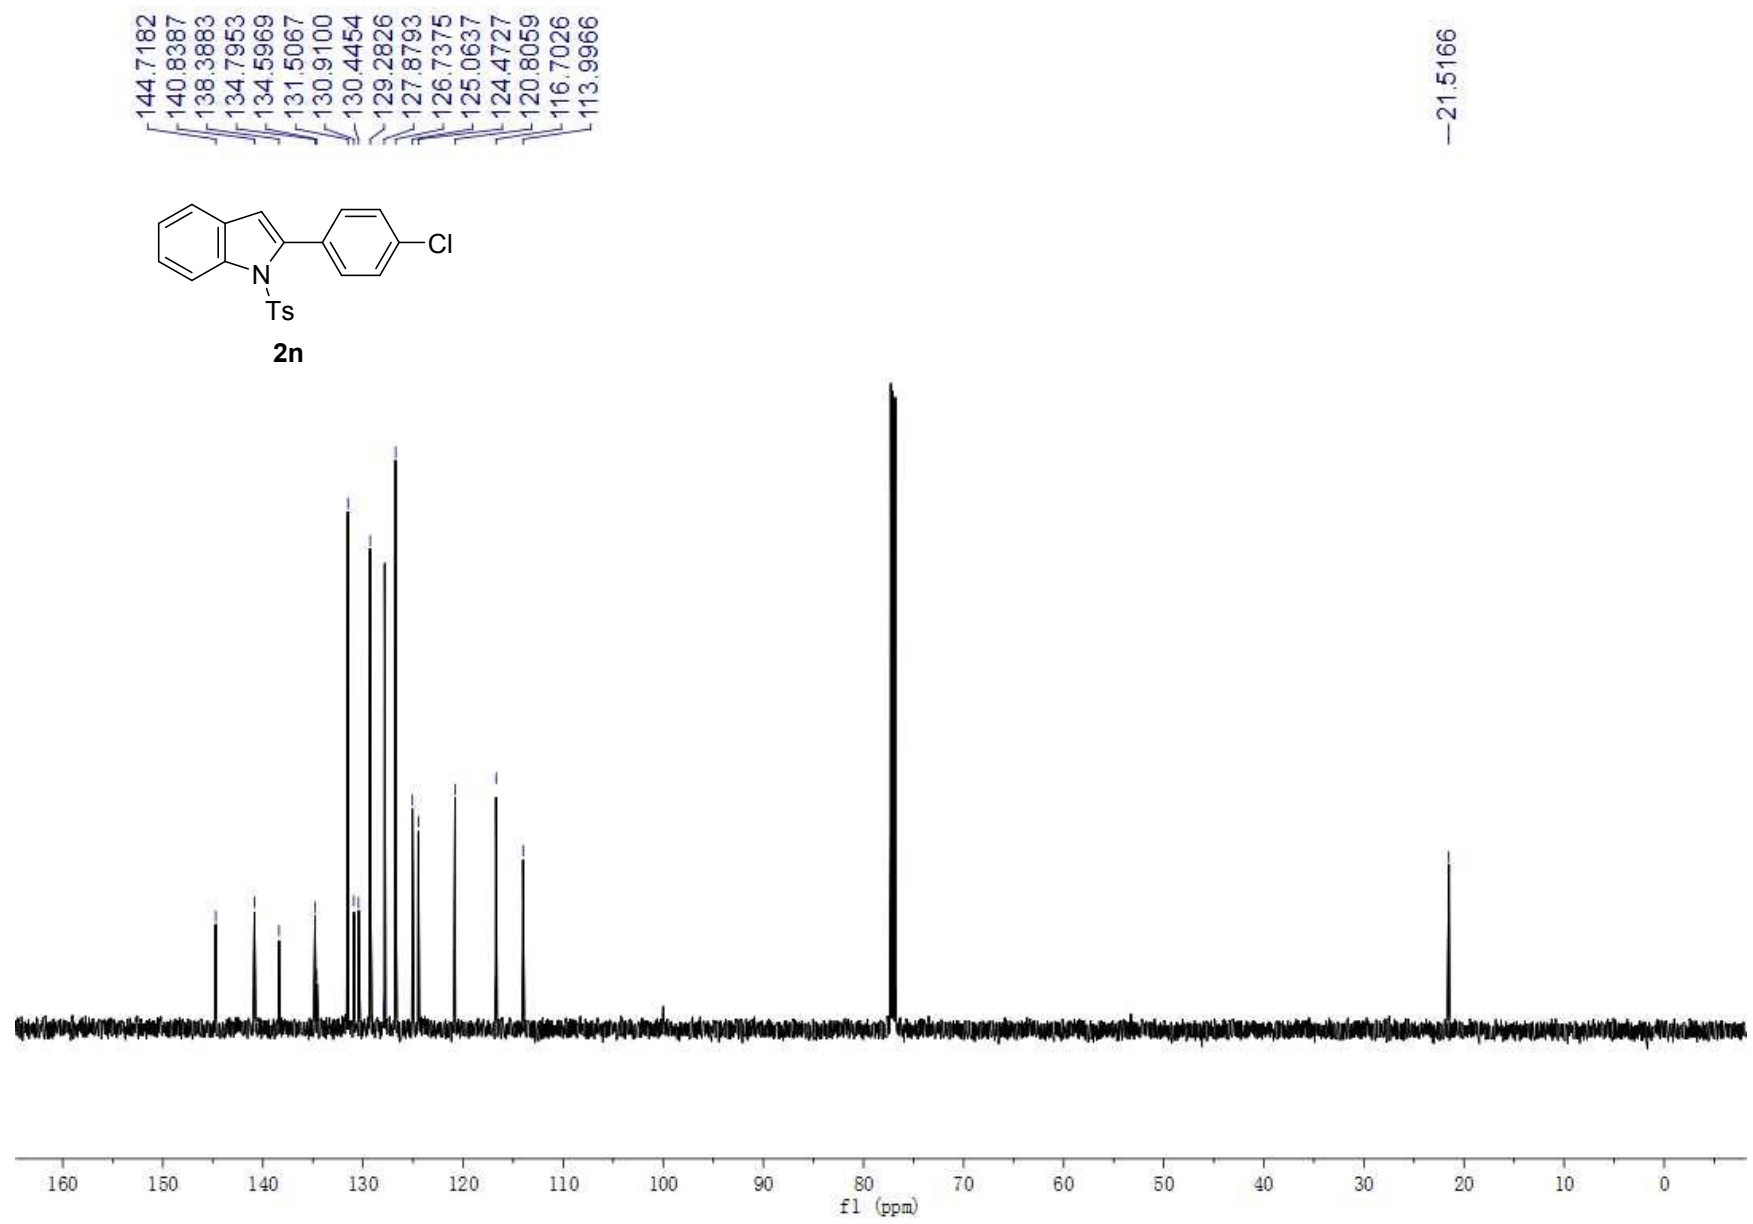

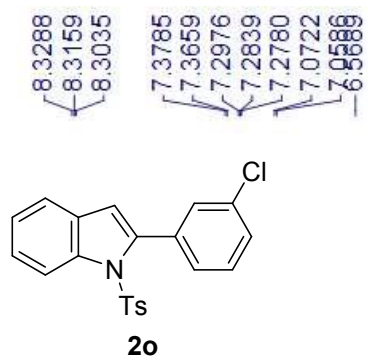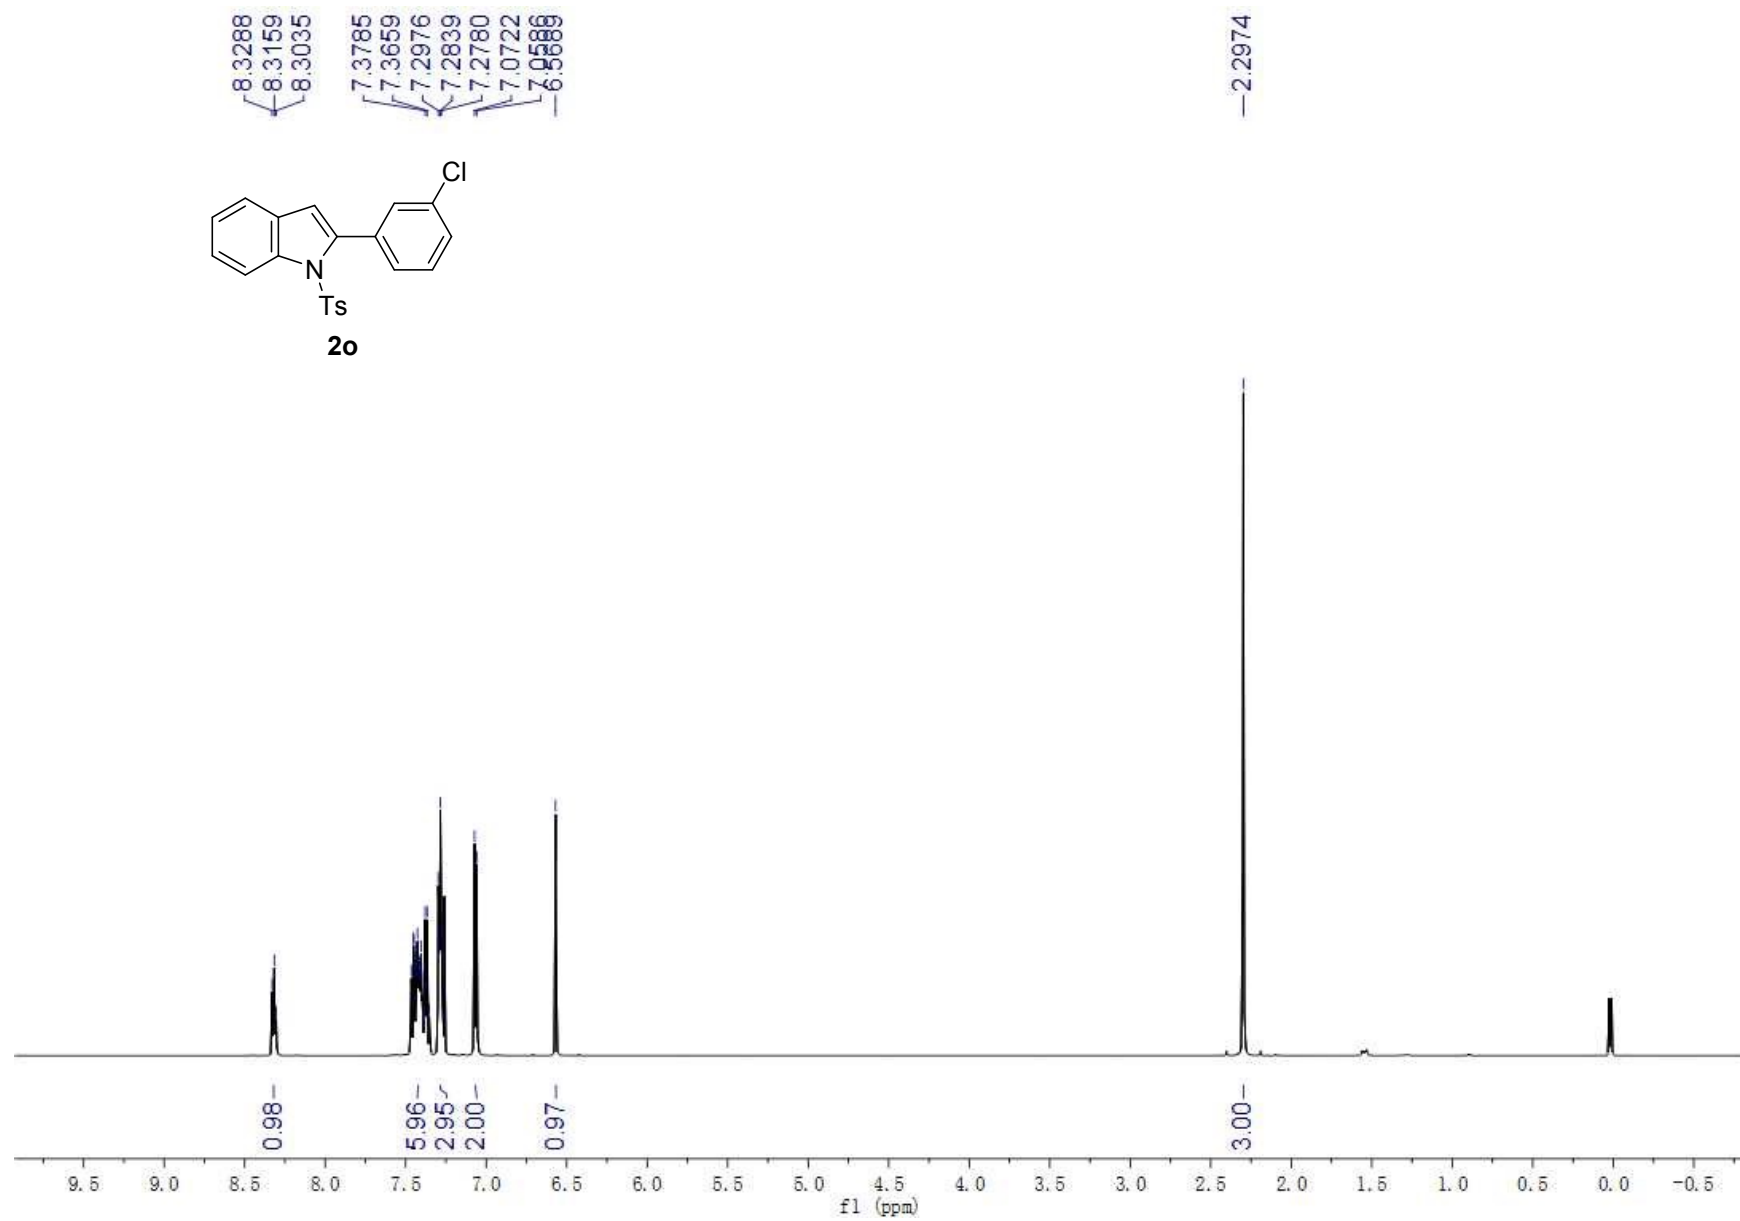

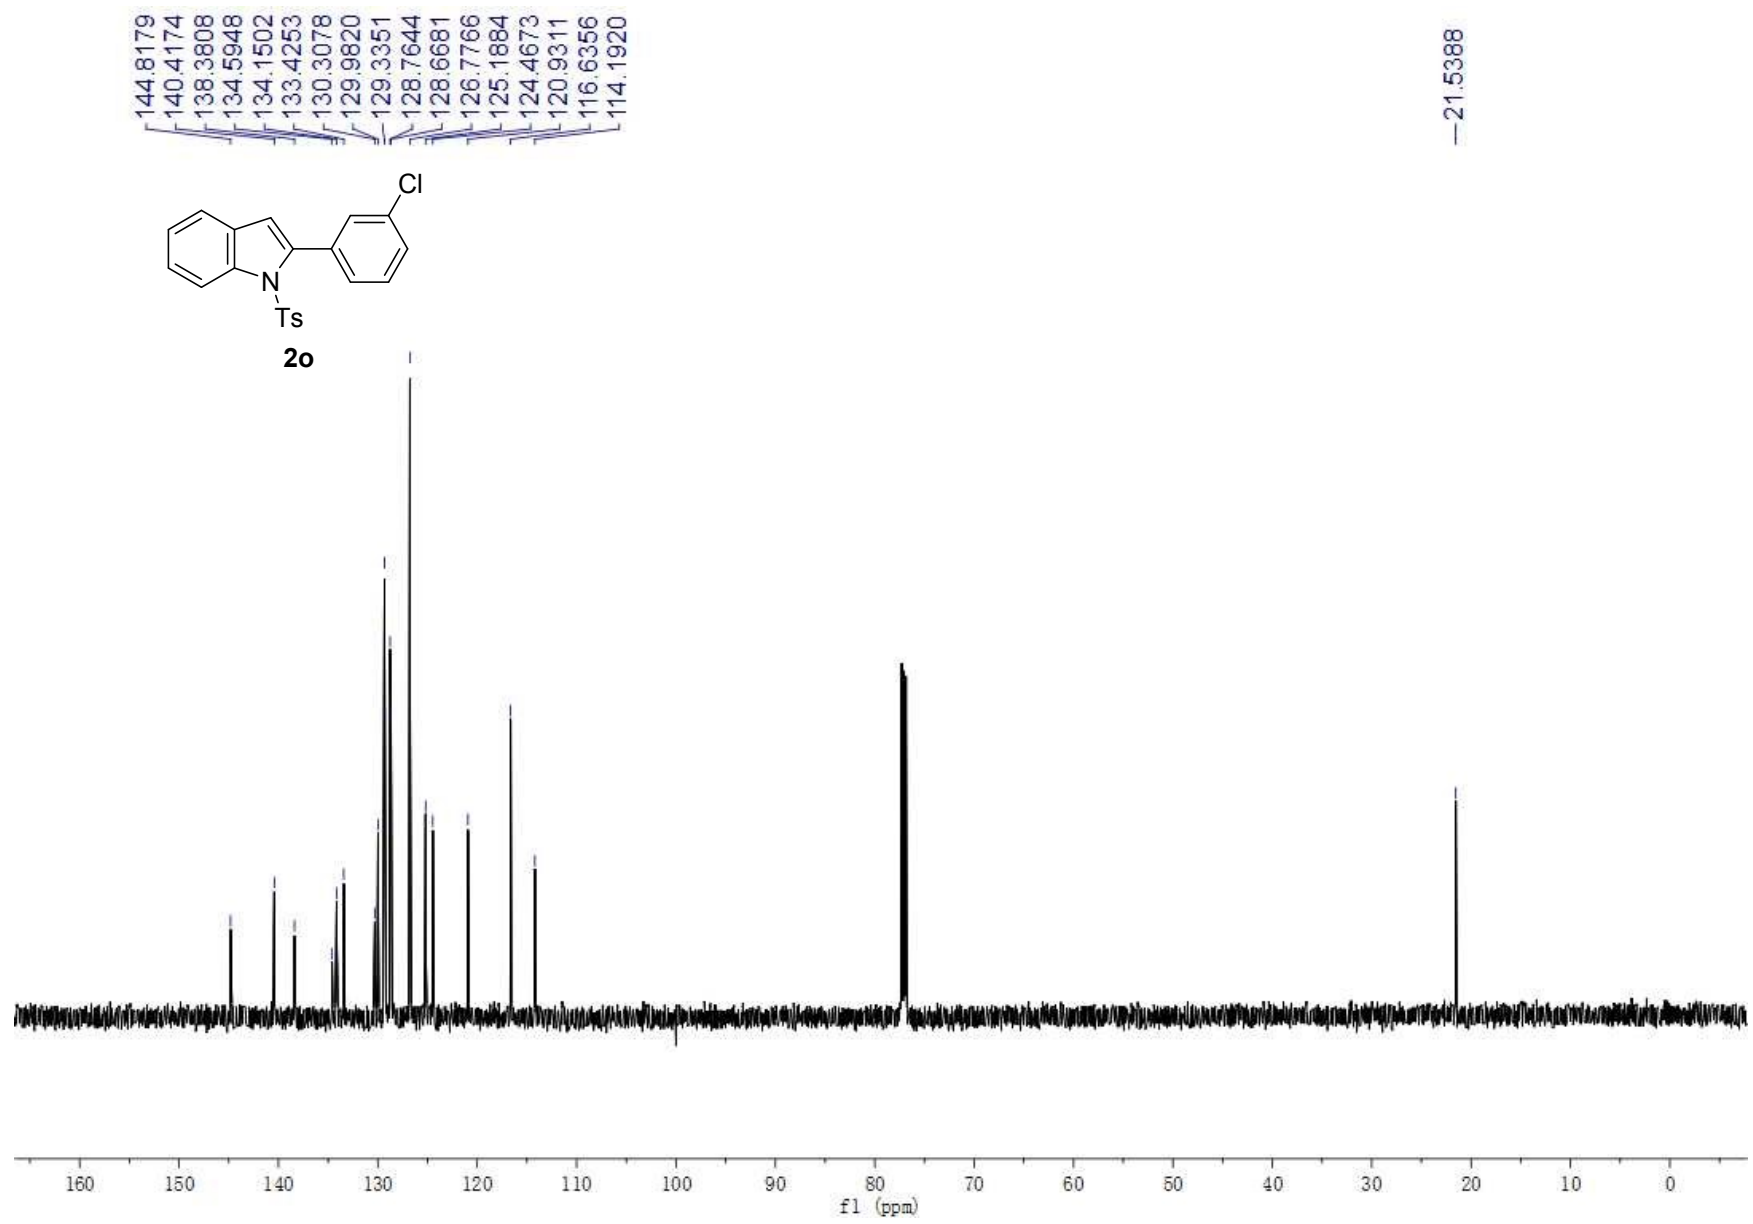

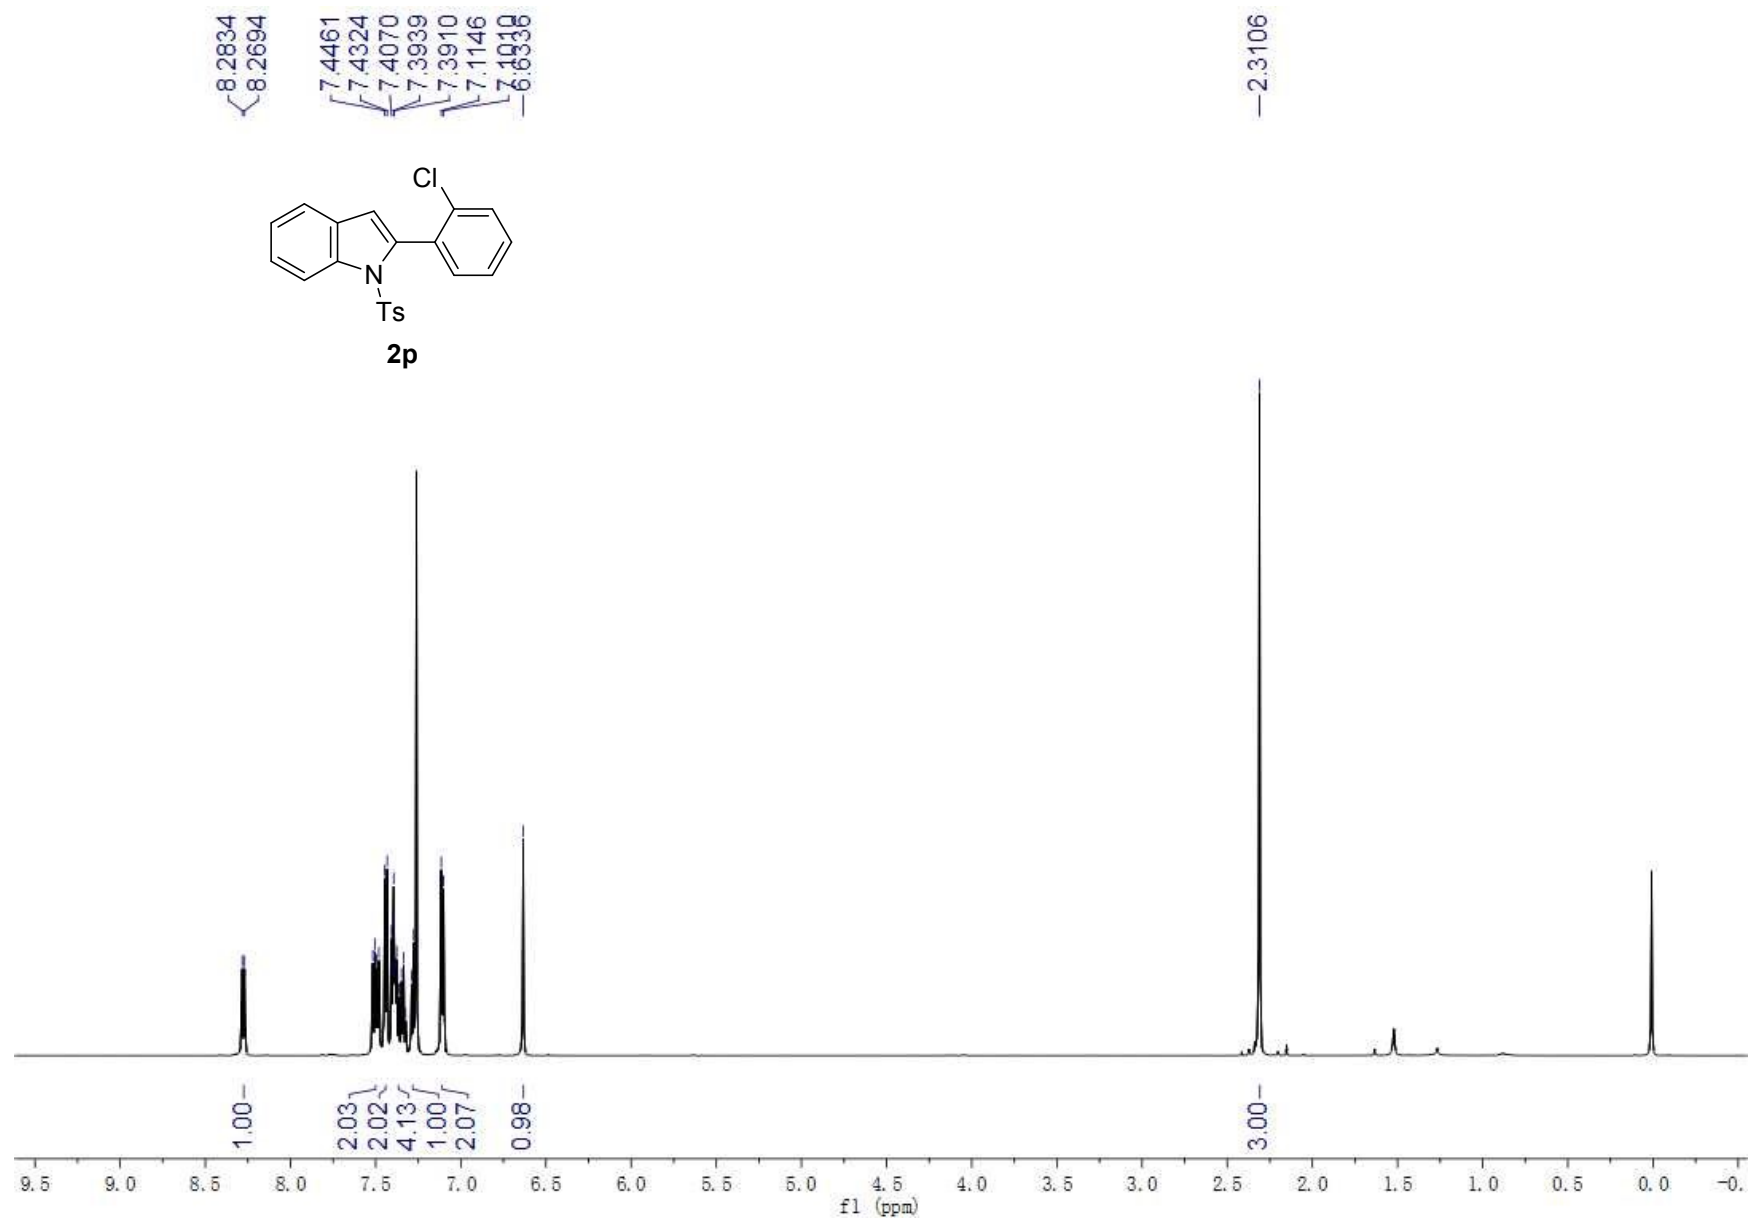

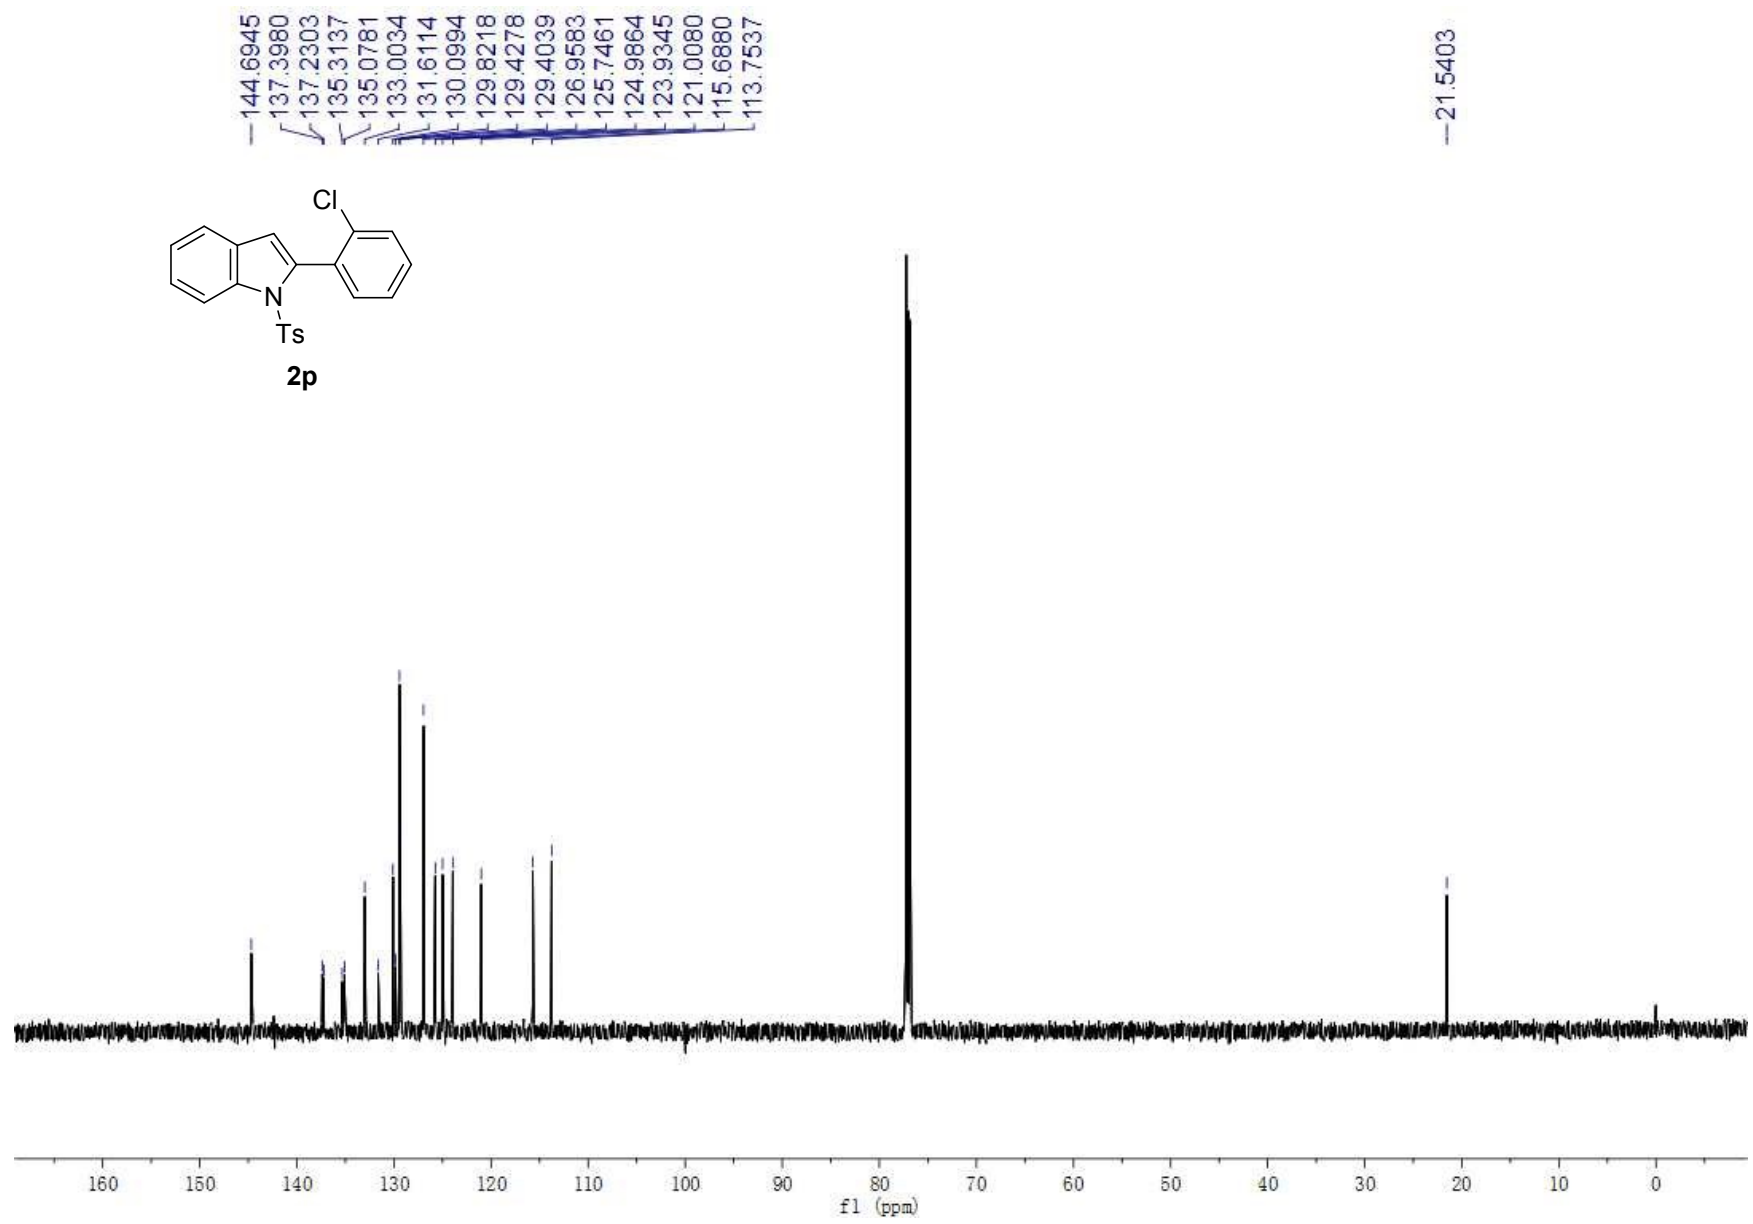

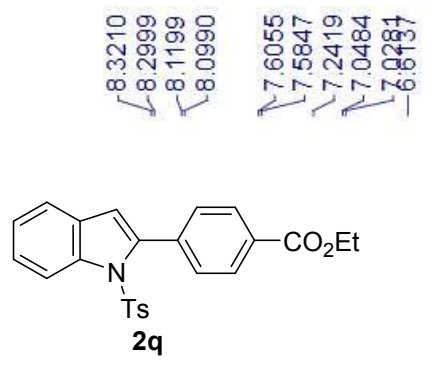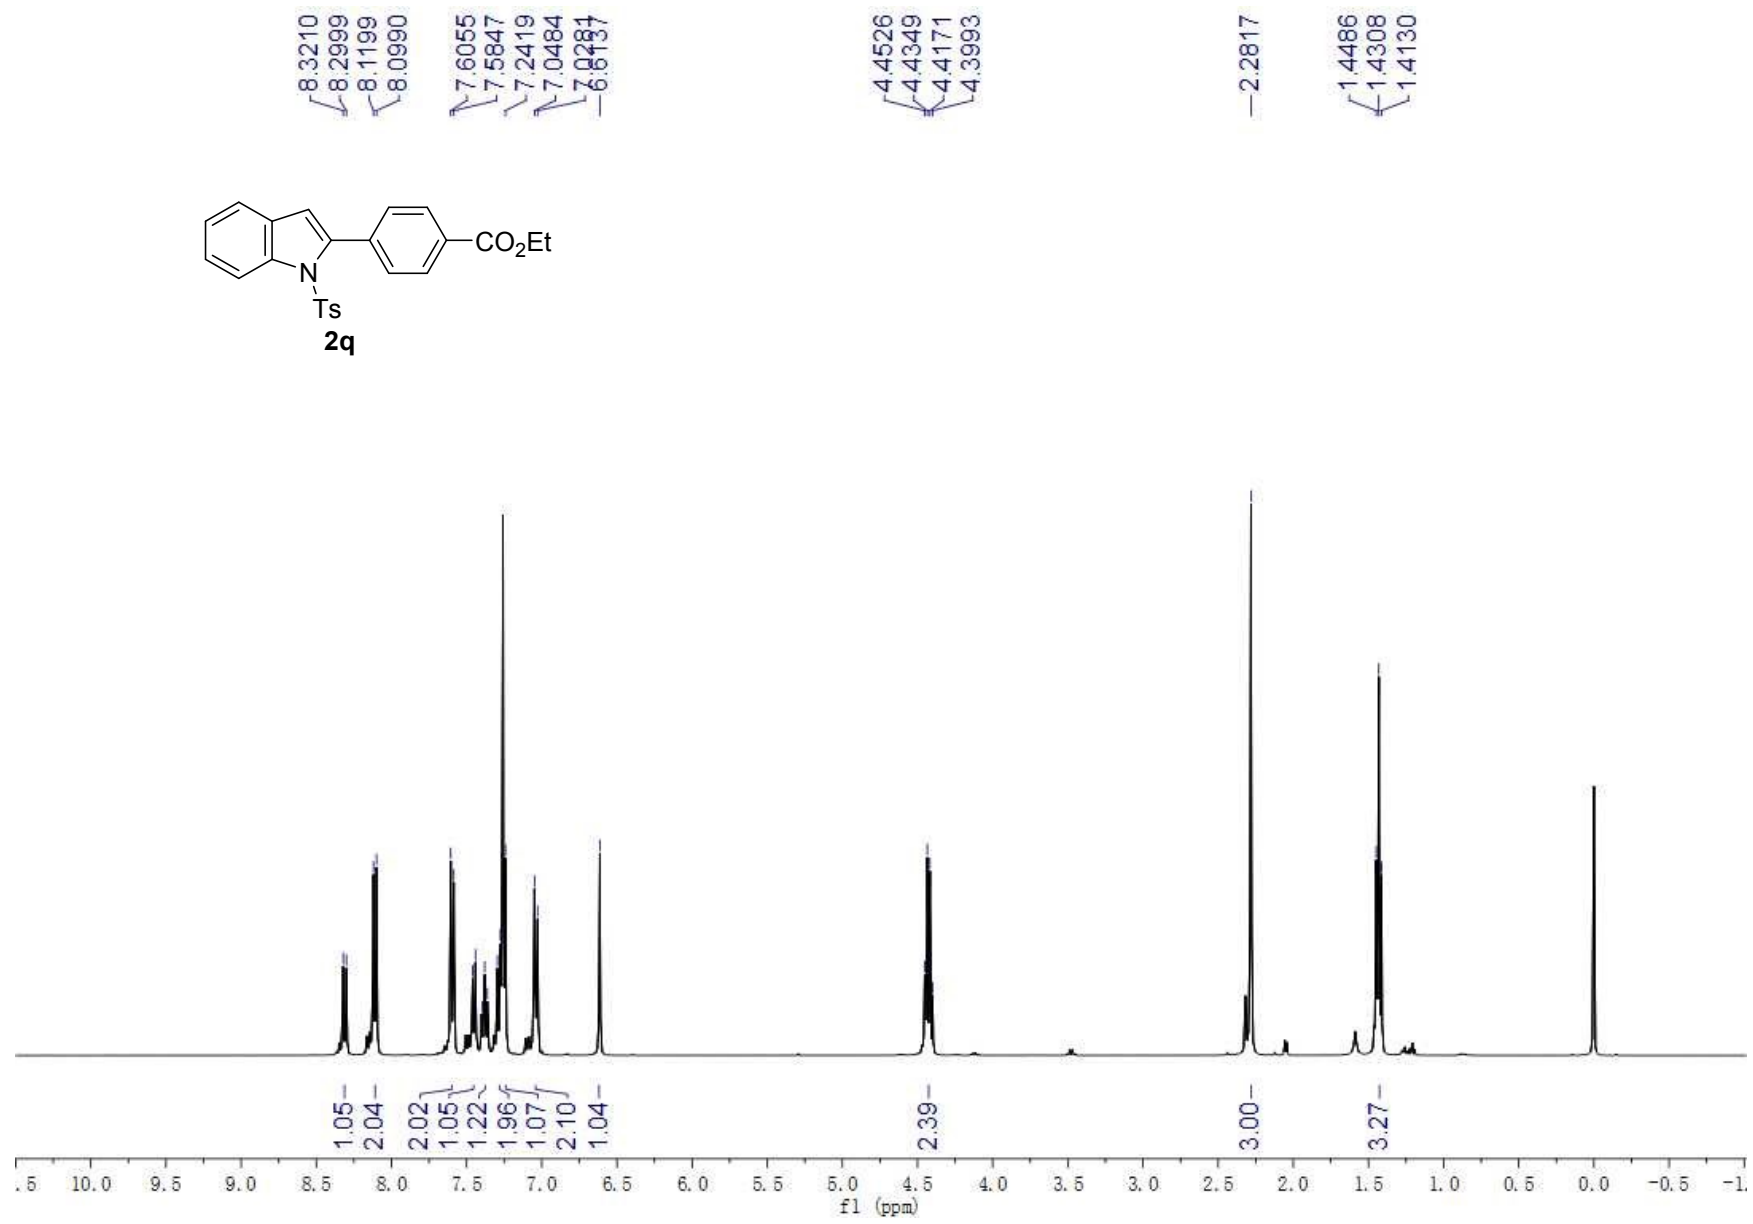



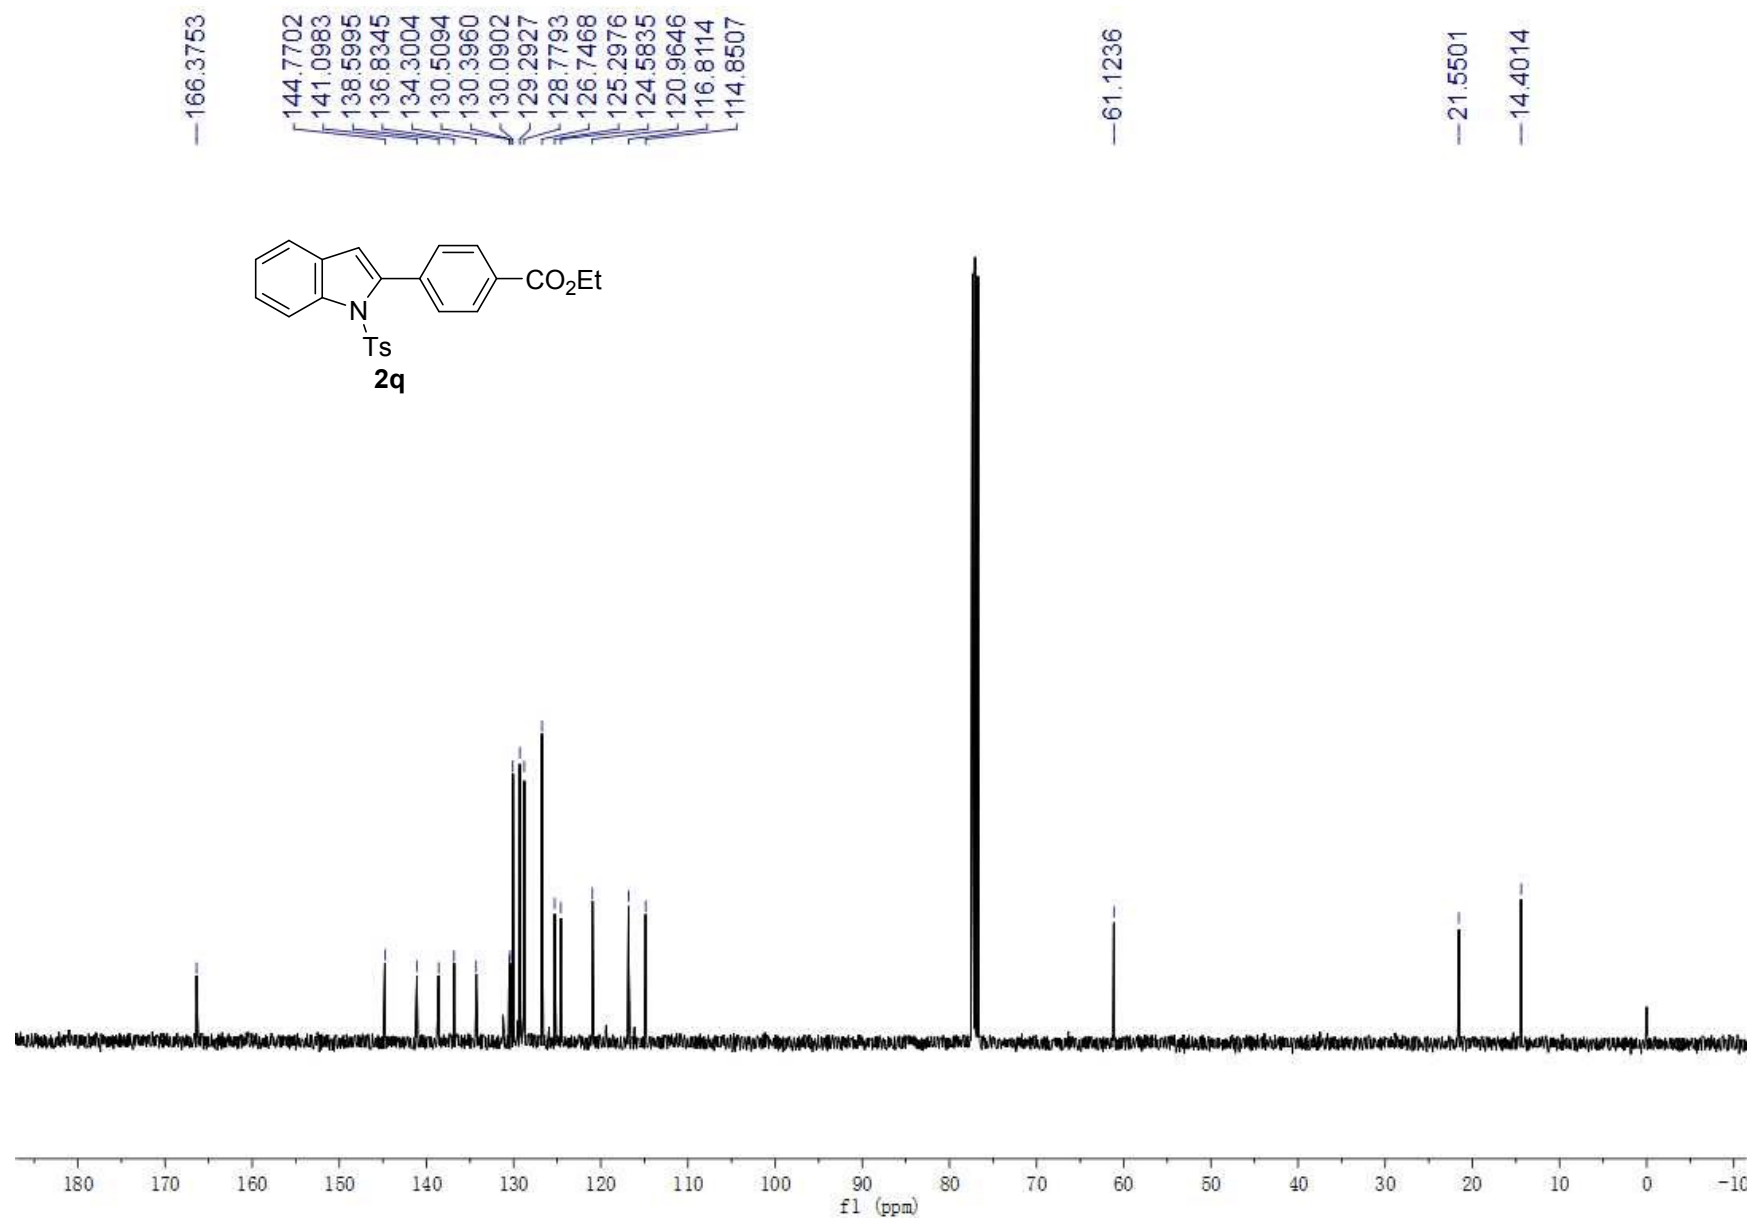

8.3194  
8.3180  
8.2985  
8.2970  
7.6704  
7.6443  
7.2672  
7.2483  
7.0537  
6.8664

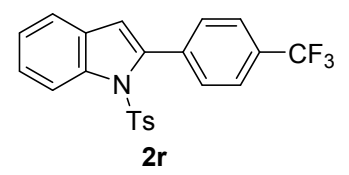

-2.2804

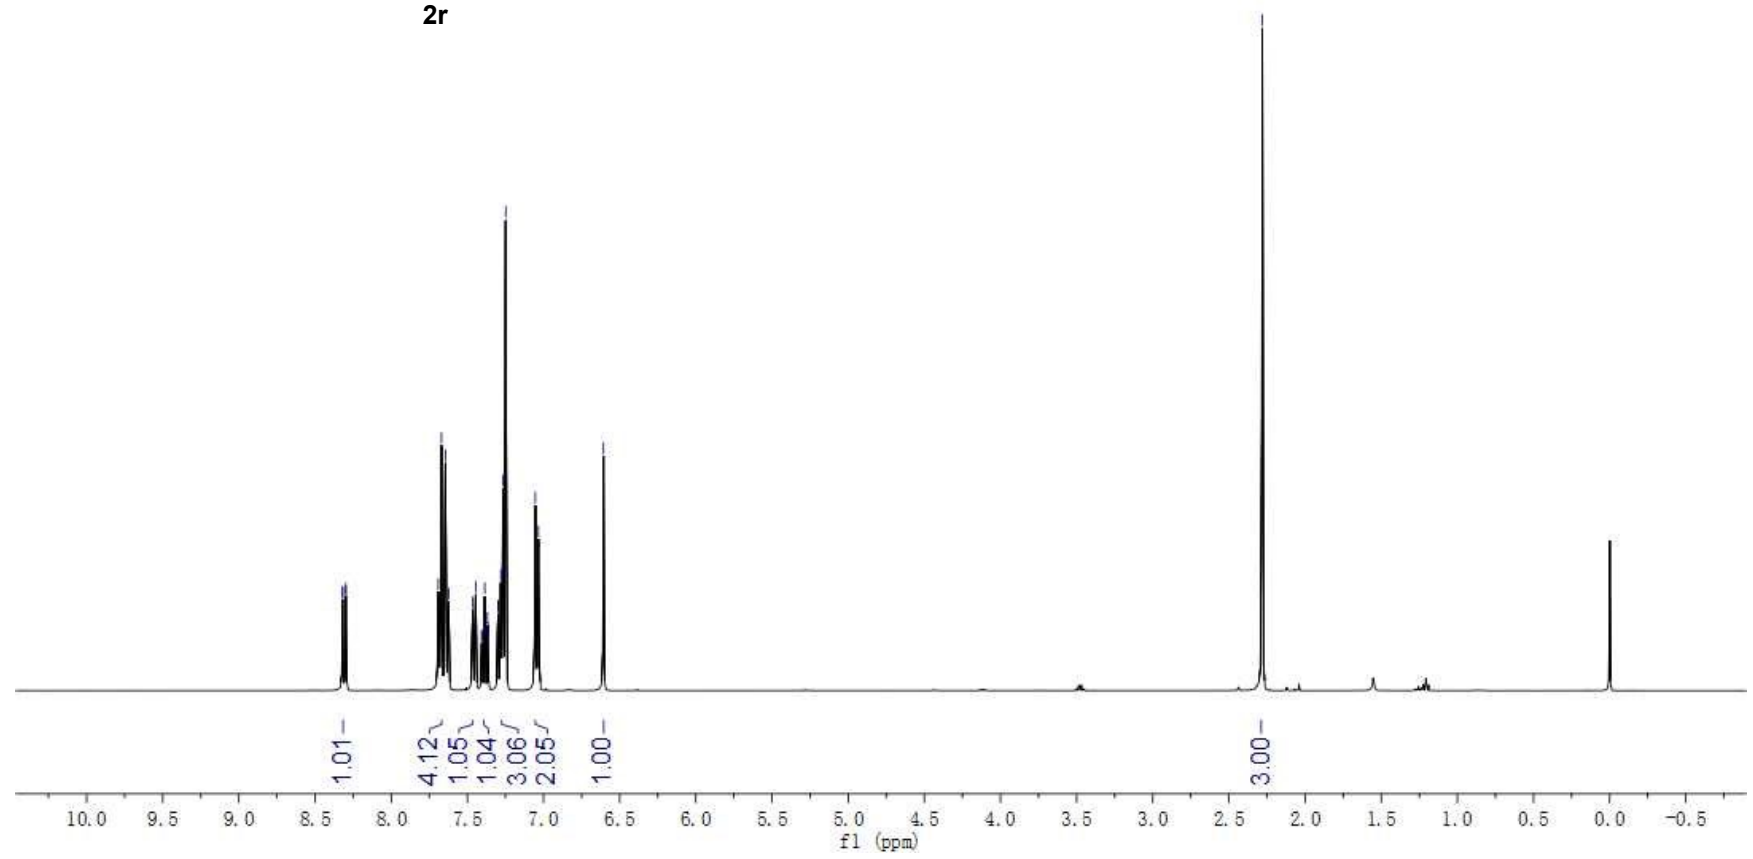

144.8840  
140.4945  
138.5343  
136.0727  
134.2748  
130.4175  
129.3471  
126.7290  
125.4202  
124.6400  
124.6064  
124.5681  
124.5309  
124.4932  
121.0329  
116.7630  
115.0056

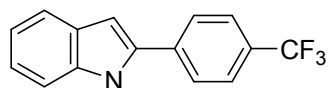

Ts  
**2r**

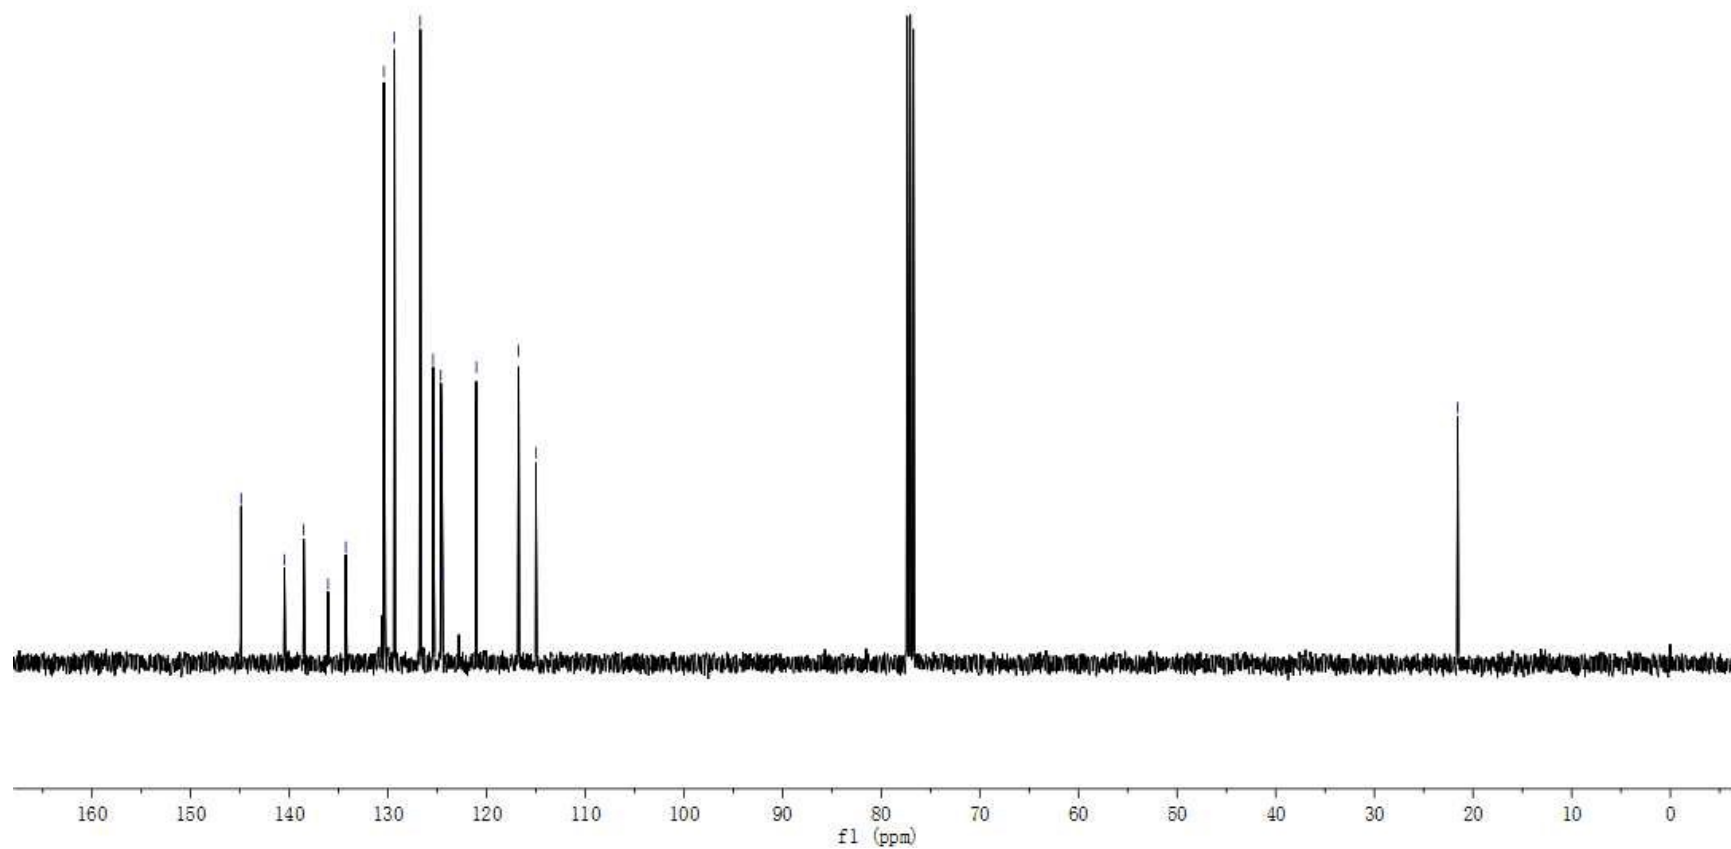

8.3058  
8.2849  
7.4078  
7.3880  
7.2864  
7.2651  
7.2229  
7.0355  
6.9019

2.4343  
2.2686

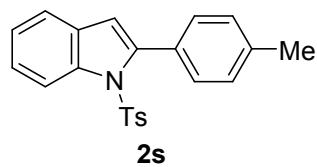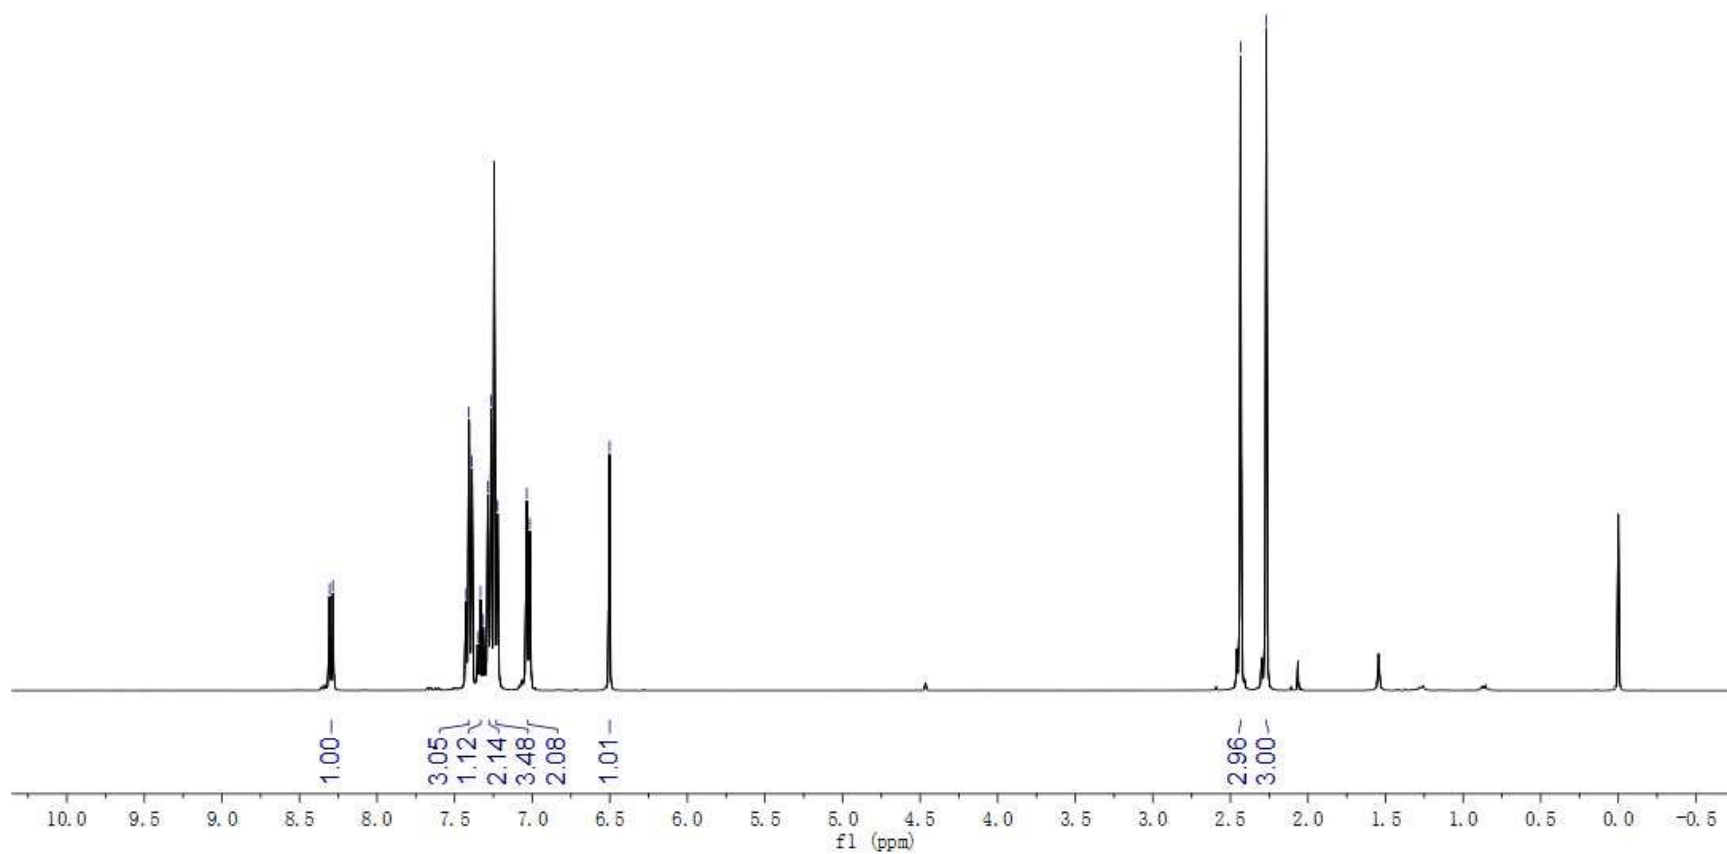

144.4929  
142.3277  
138.6472  
138.2245  
134.6206  
130.6915  
130.2155  
129.5721  
129.1964  
128.2934  
126.8208  
124.6465  
124.3096  
120.6118  
116.7031  
113.3435

21.5552  
21.4890

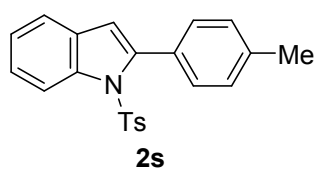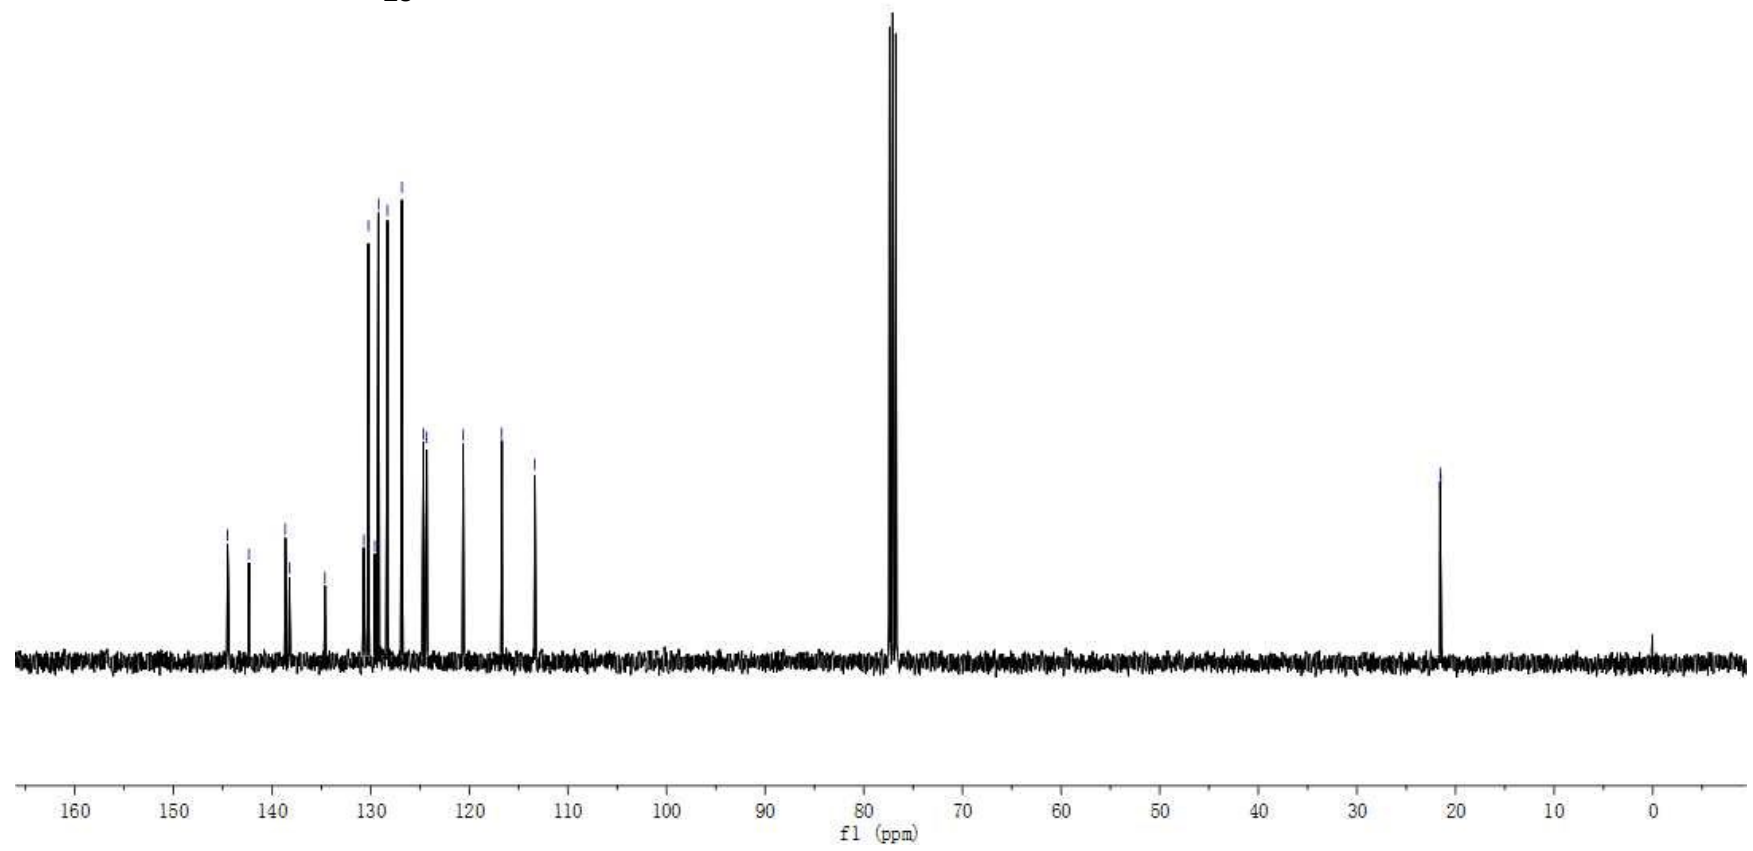

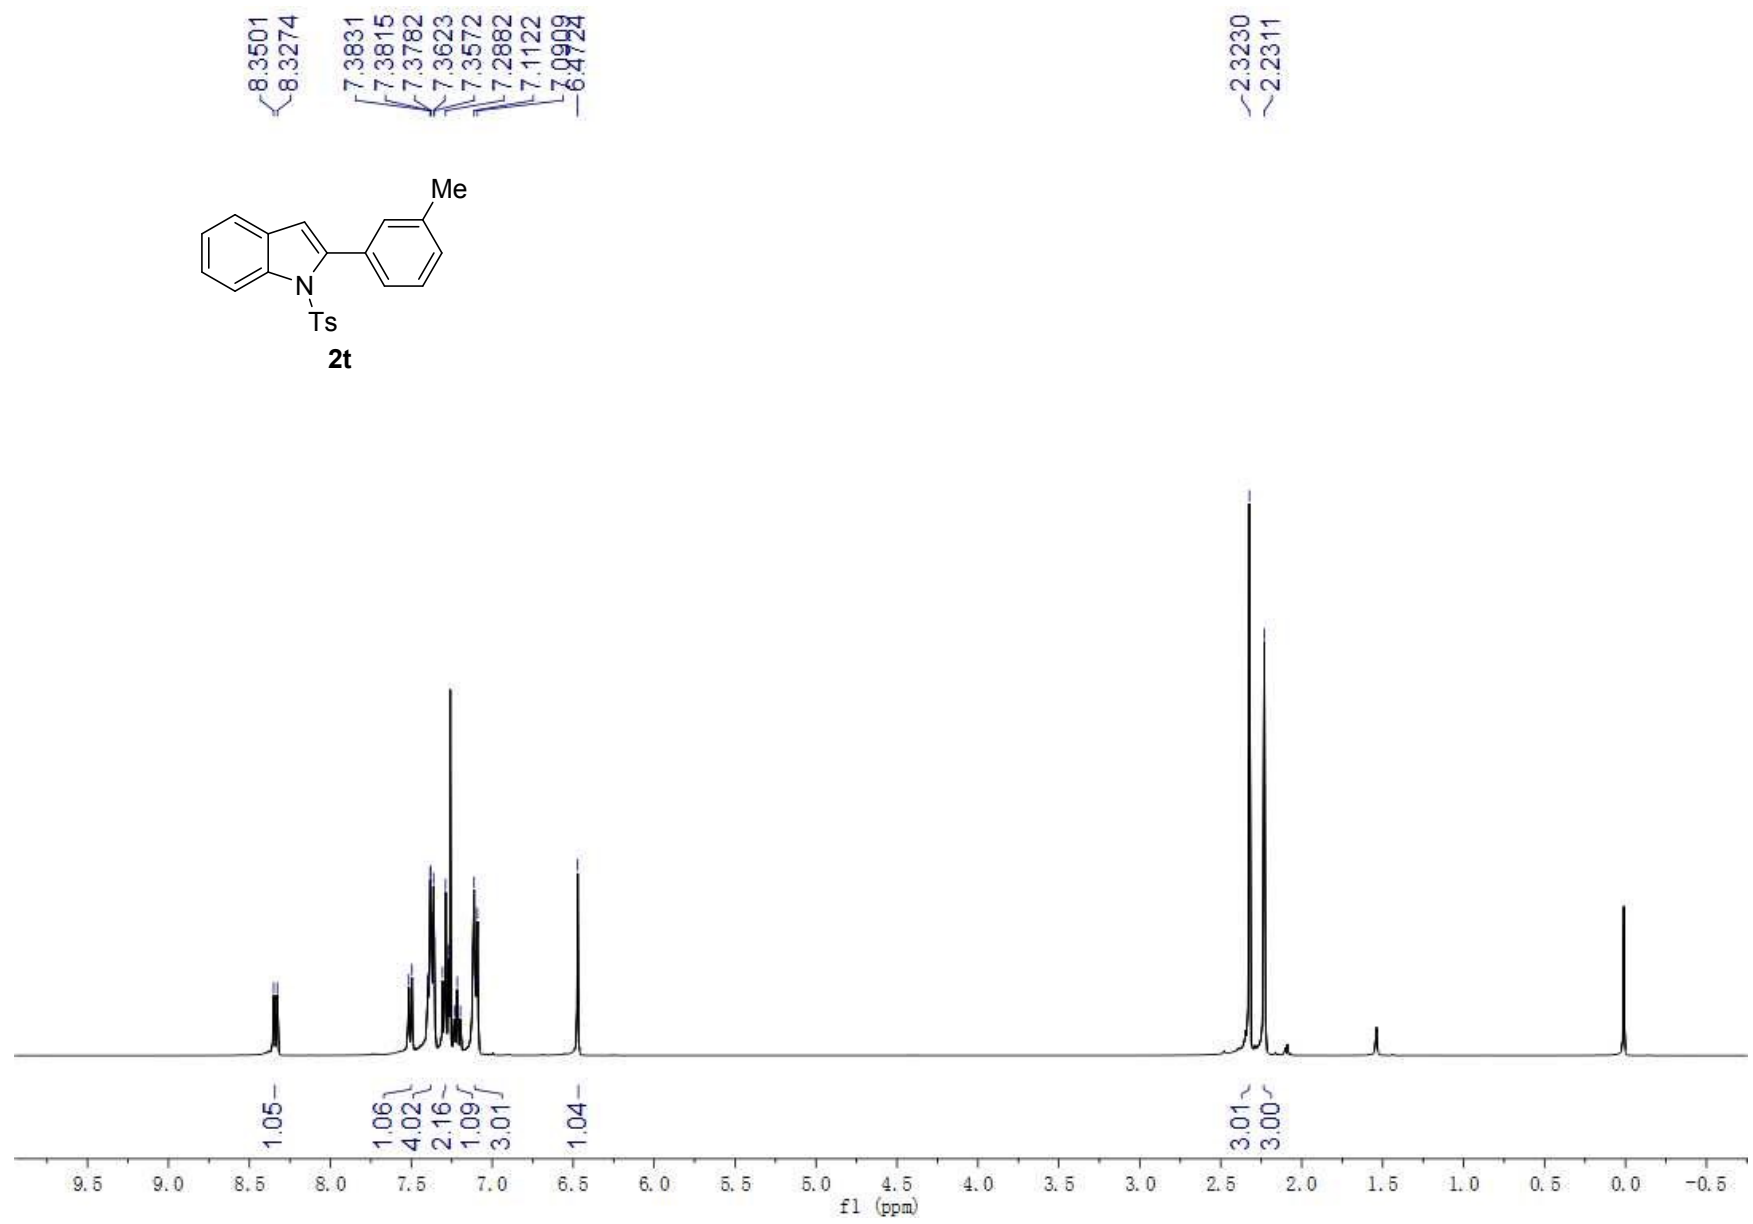

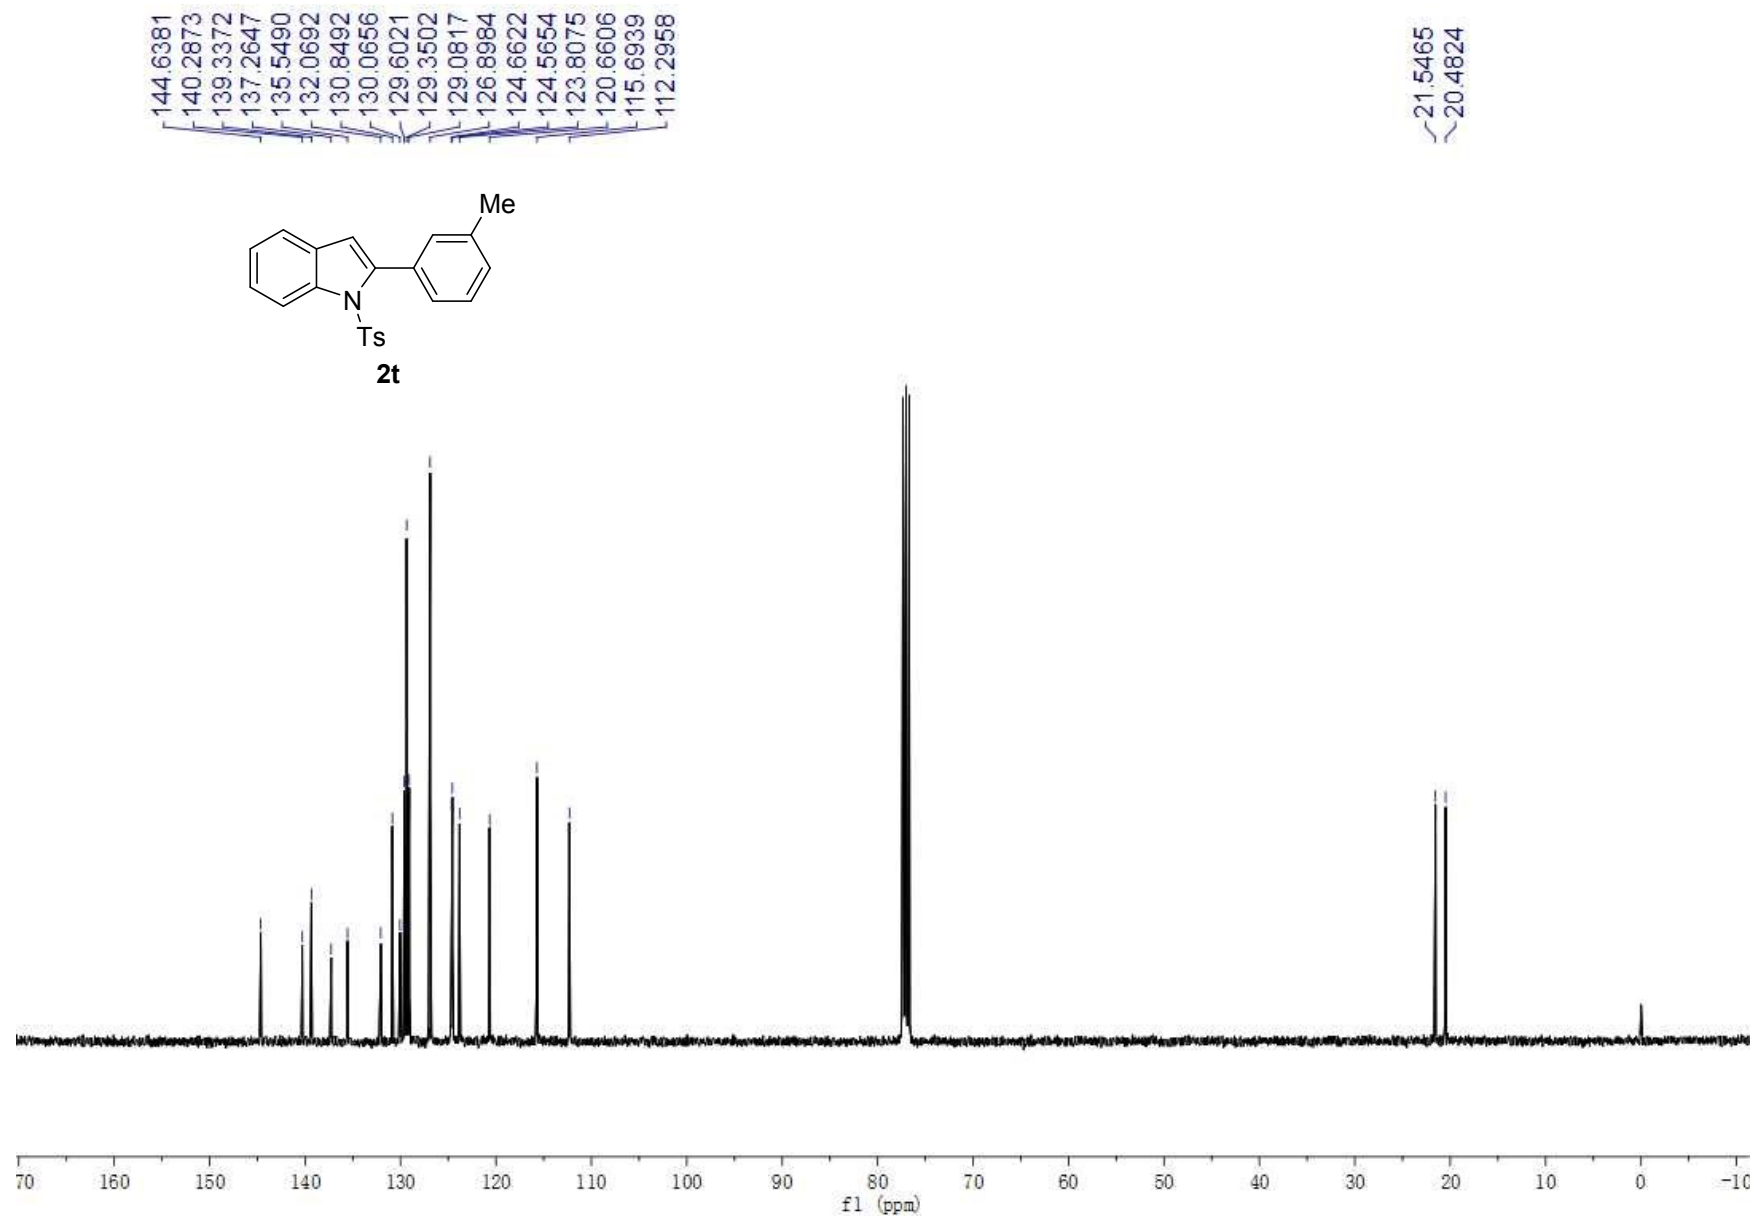

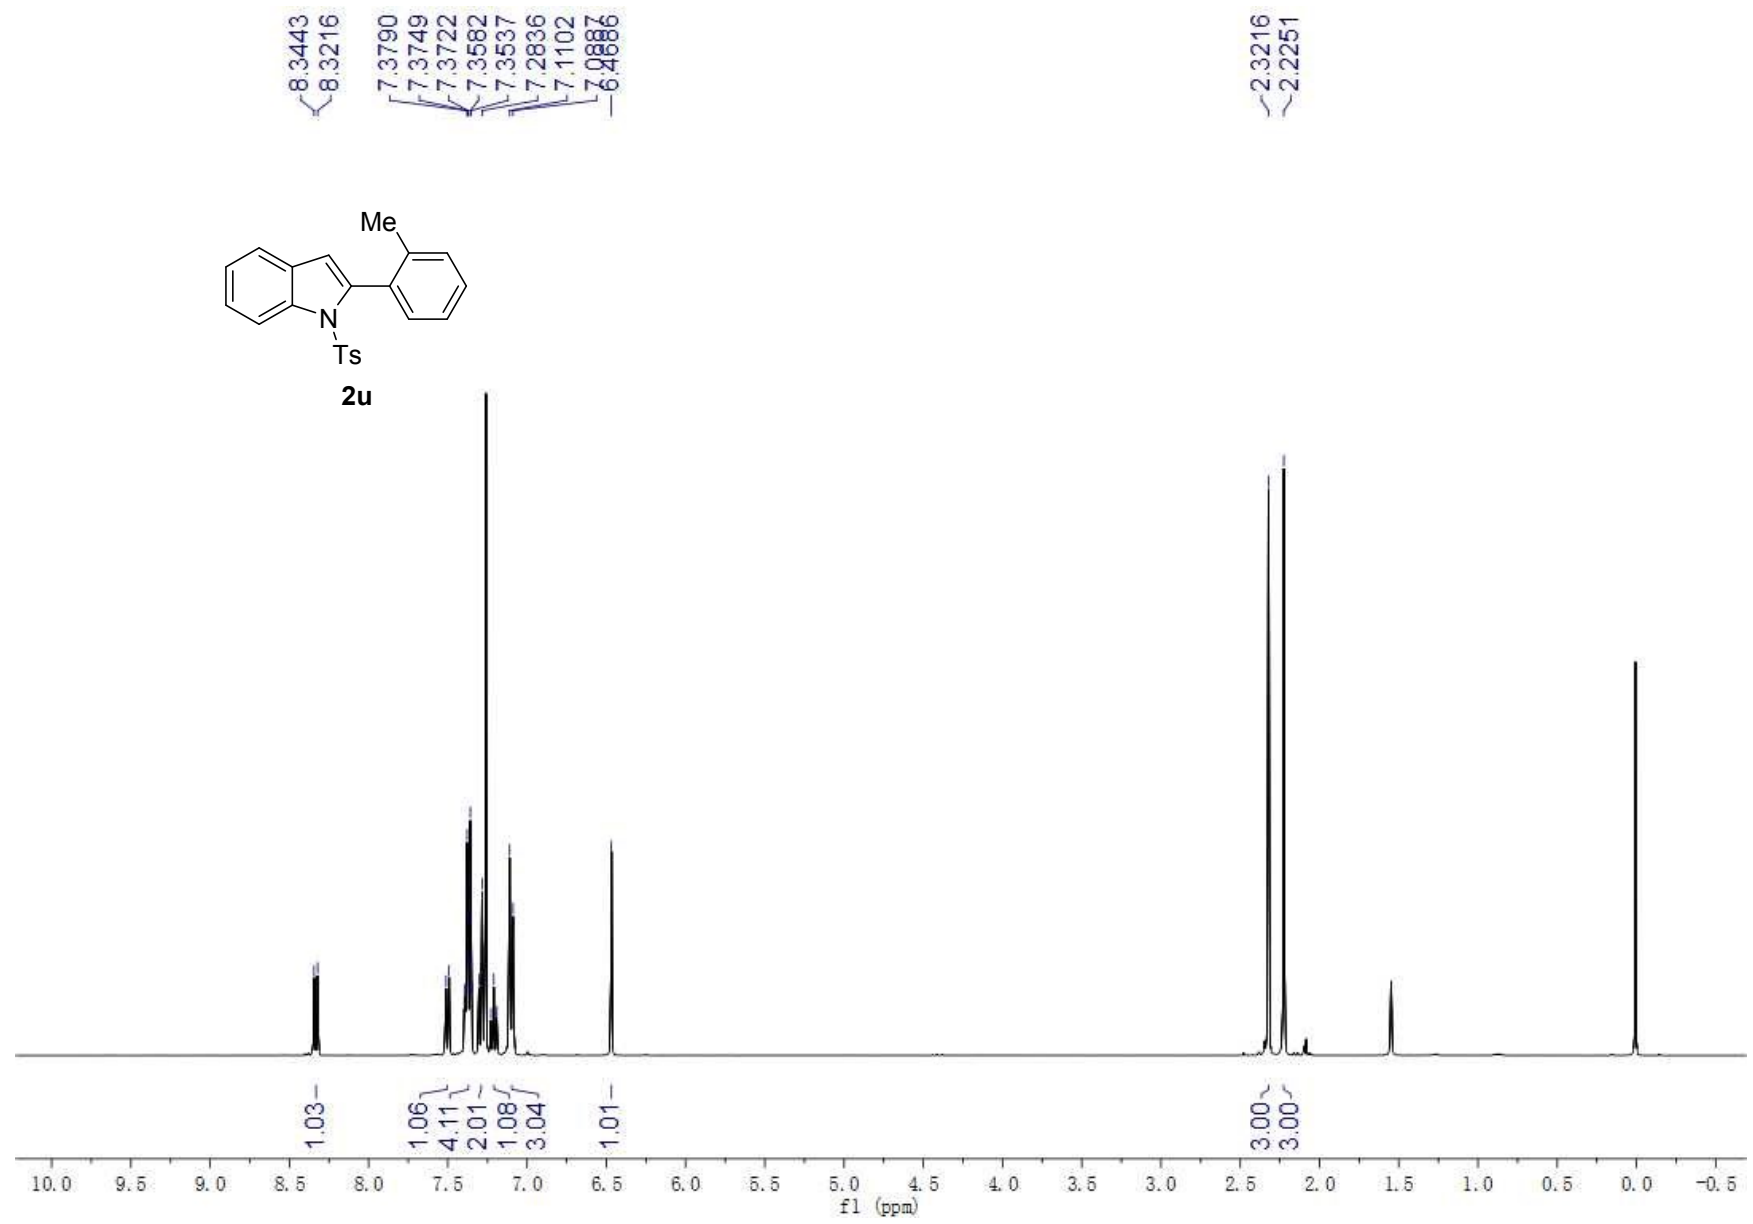



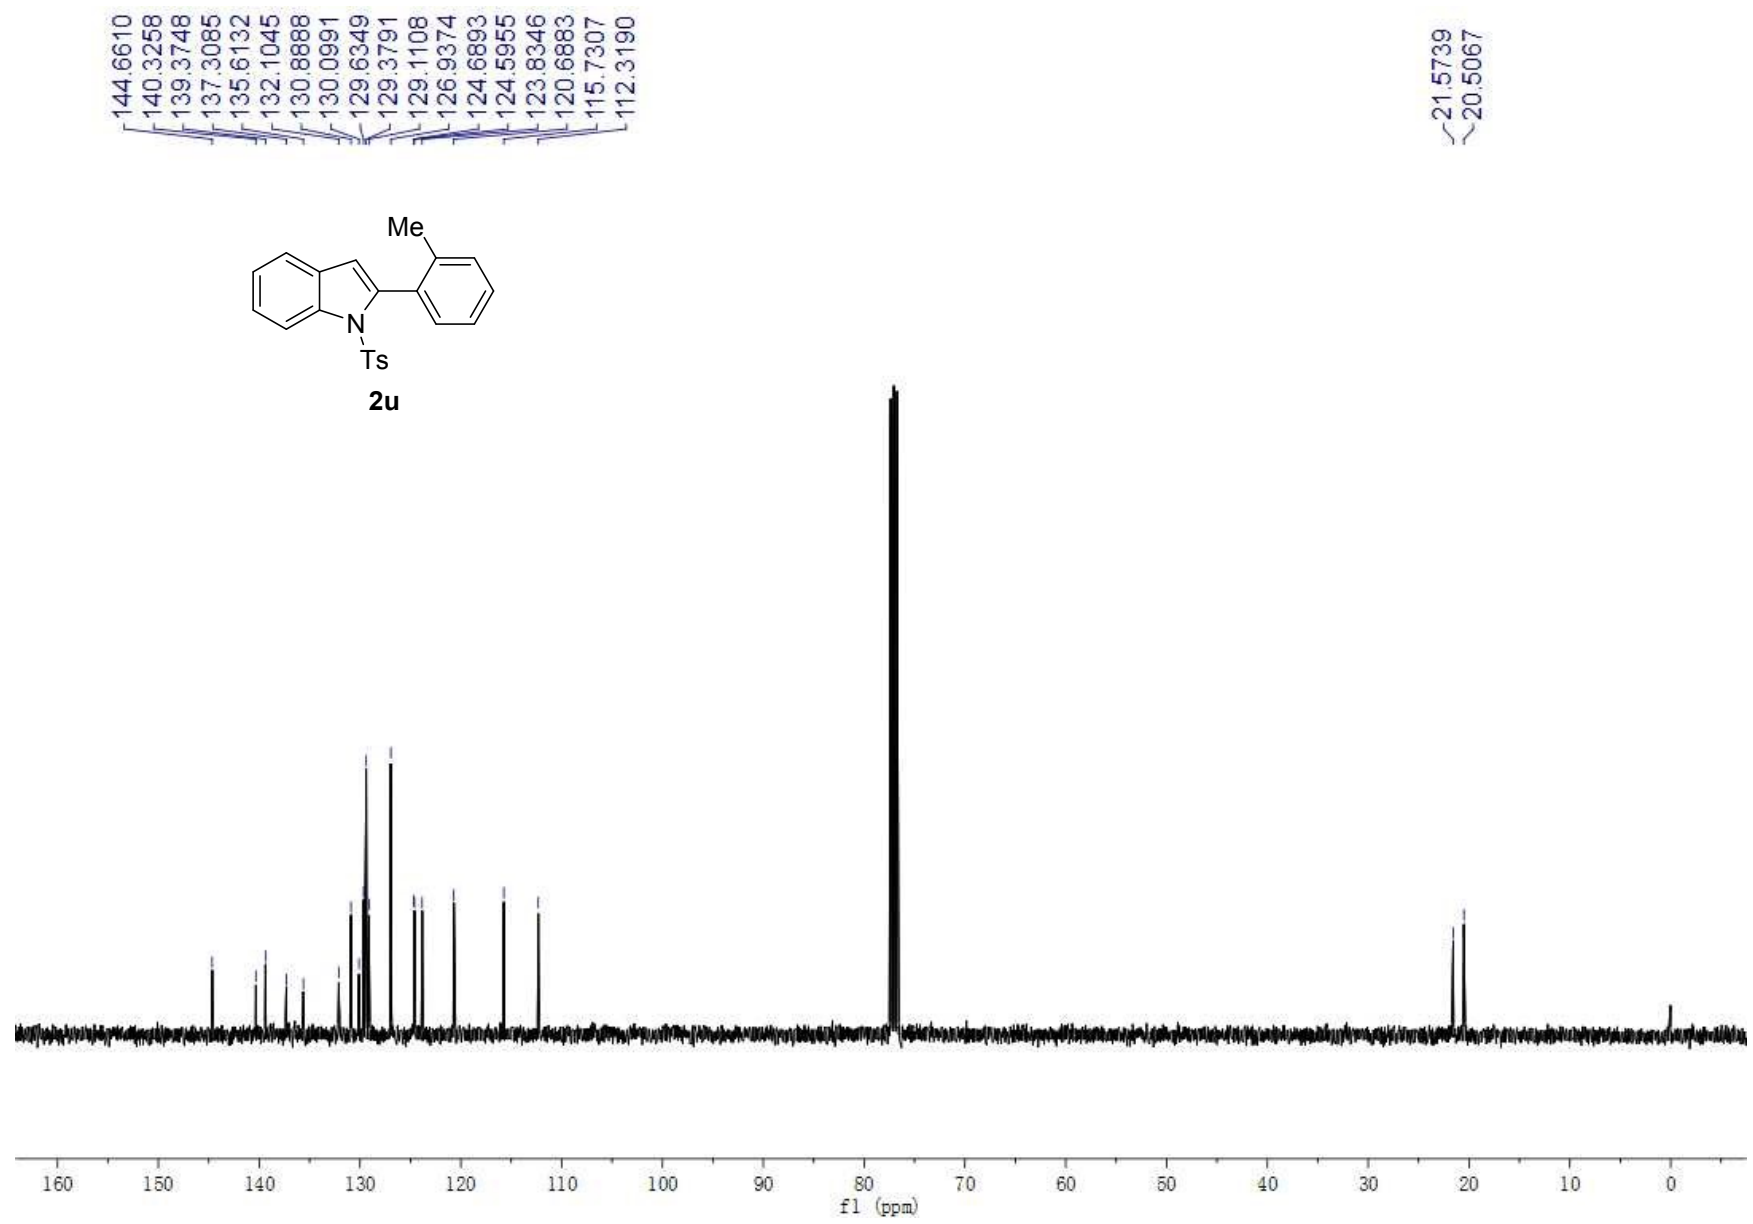

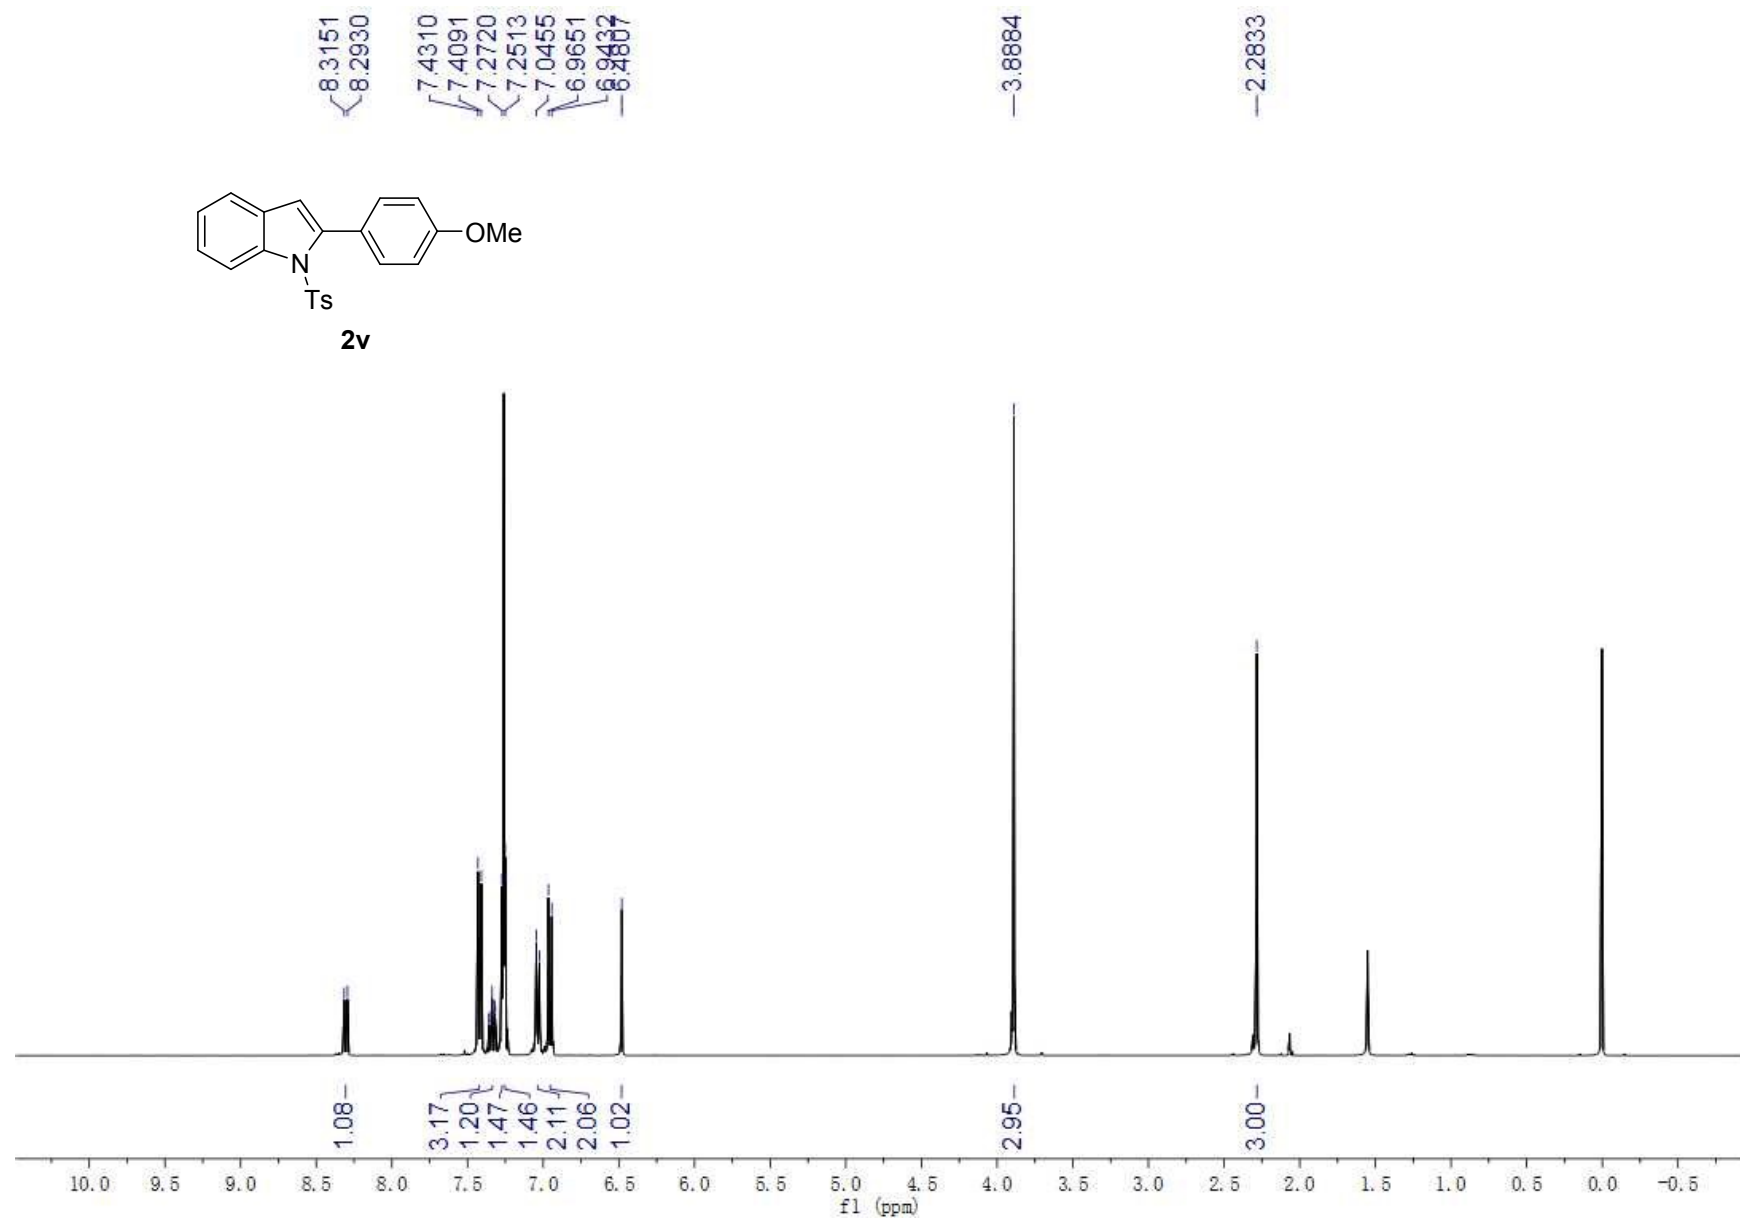

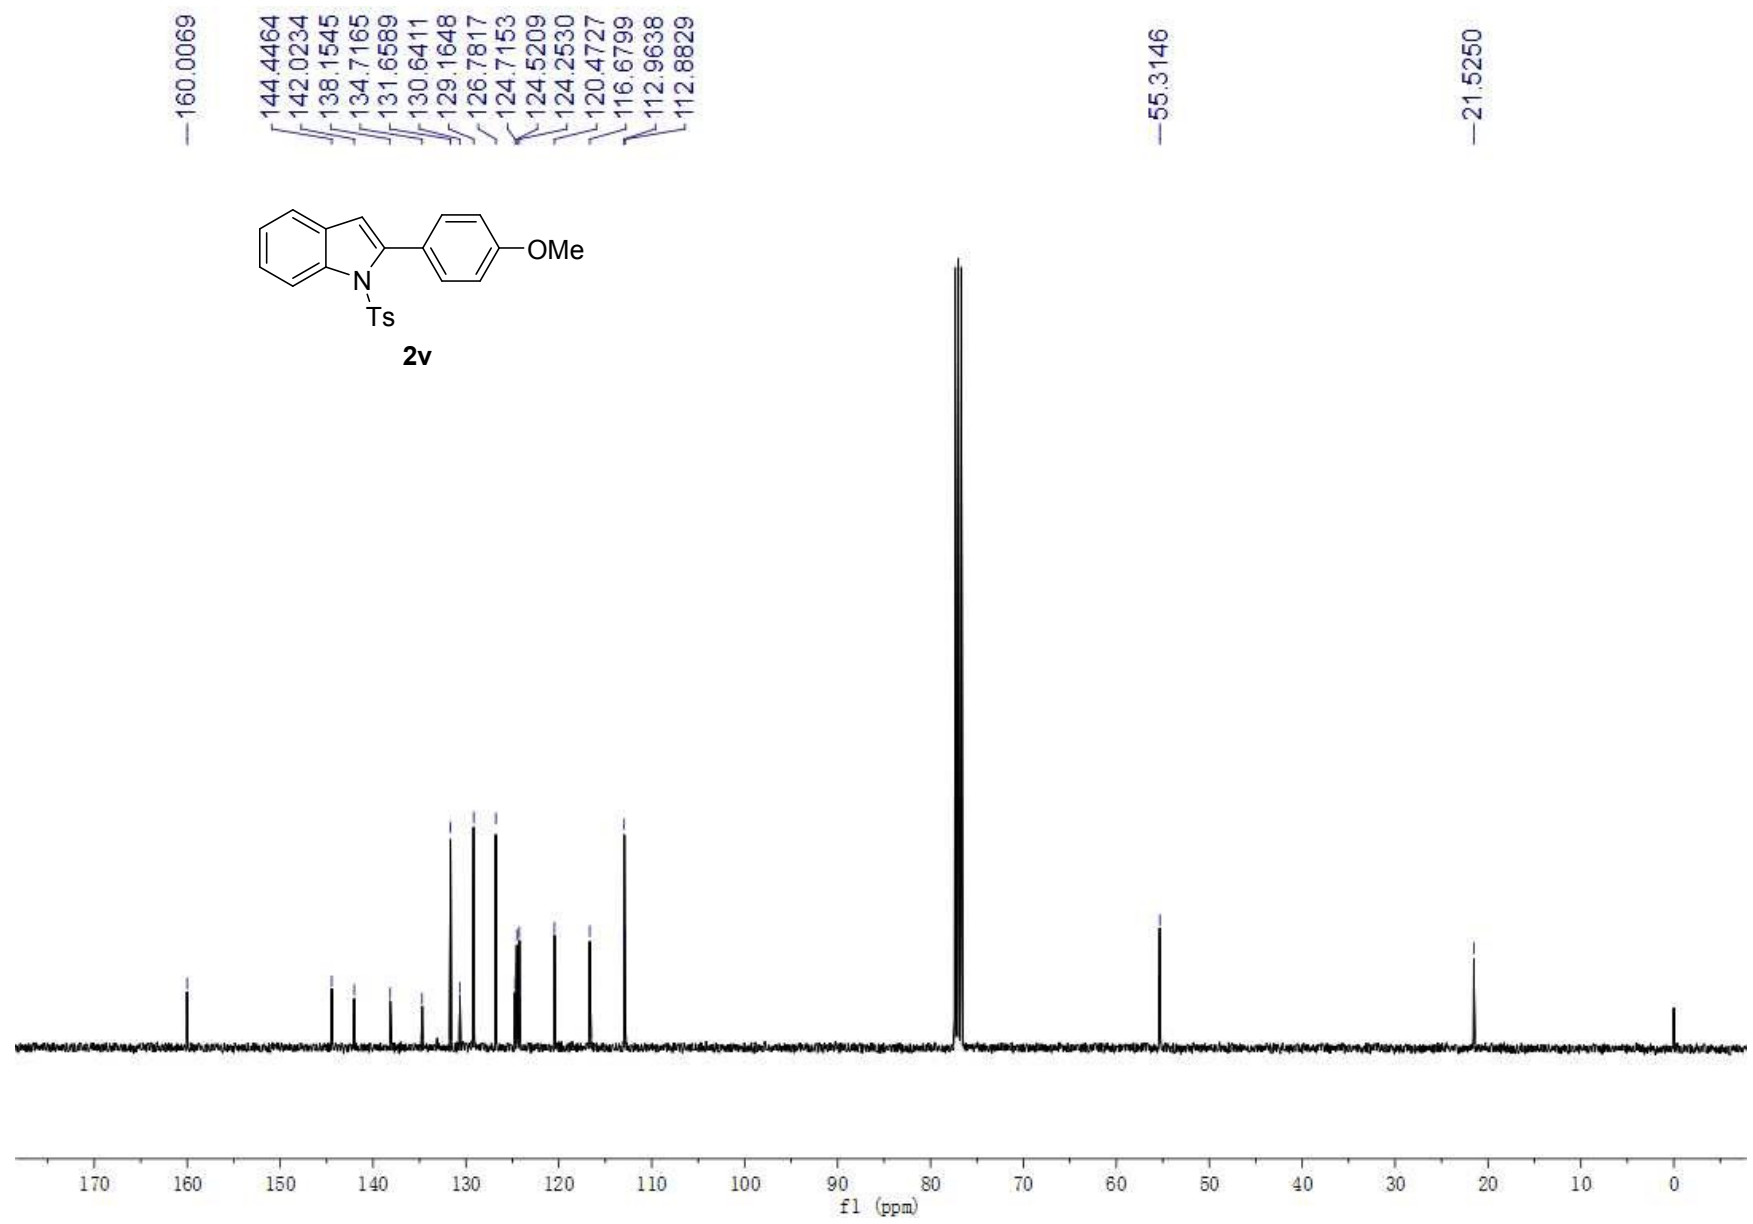

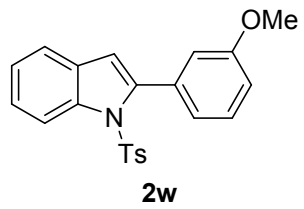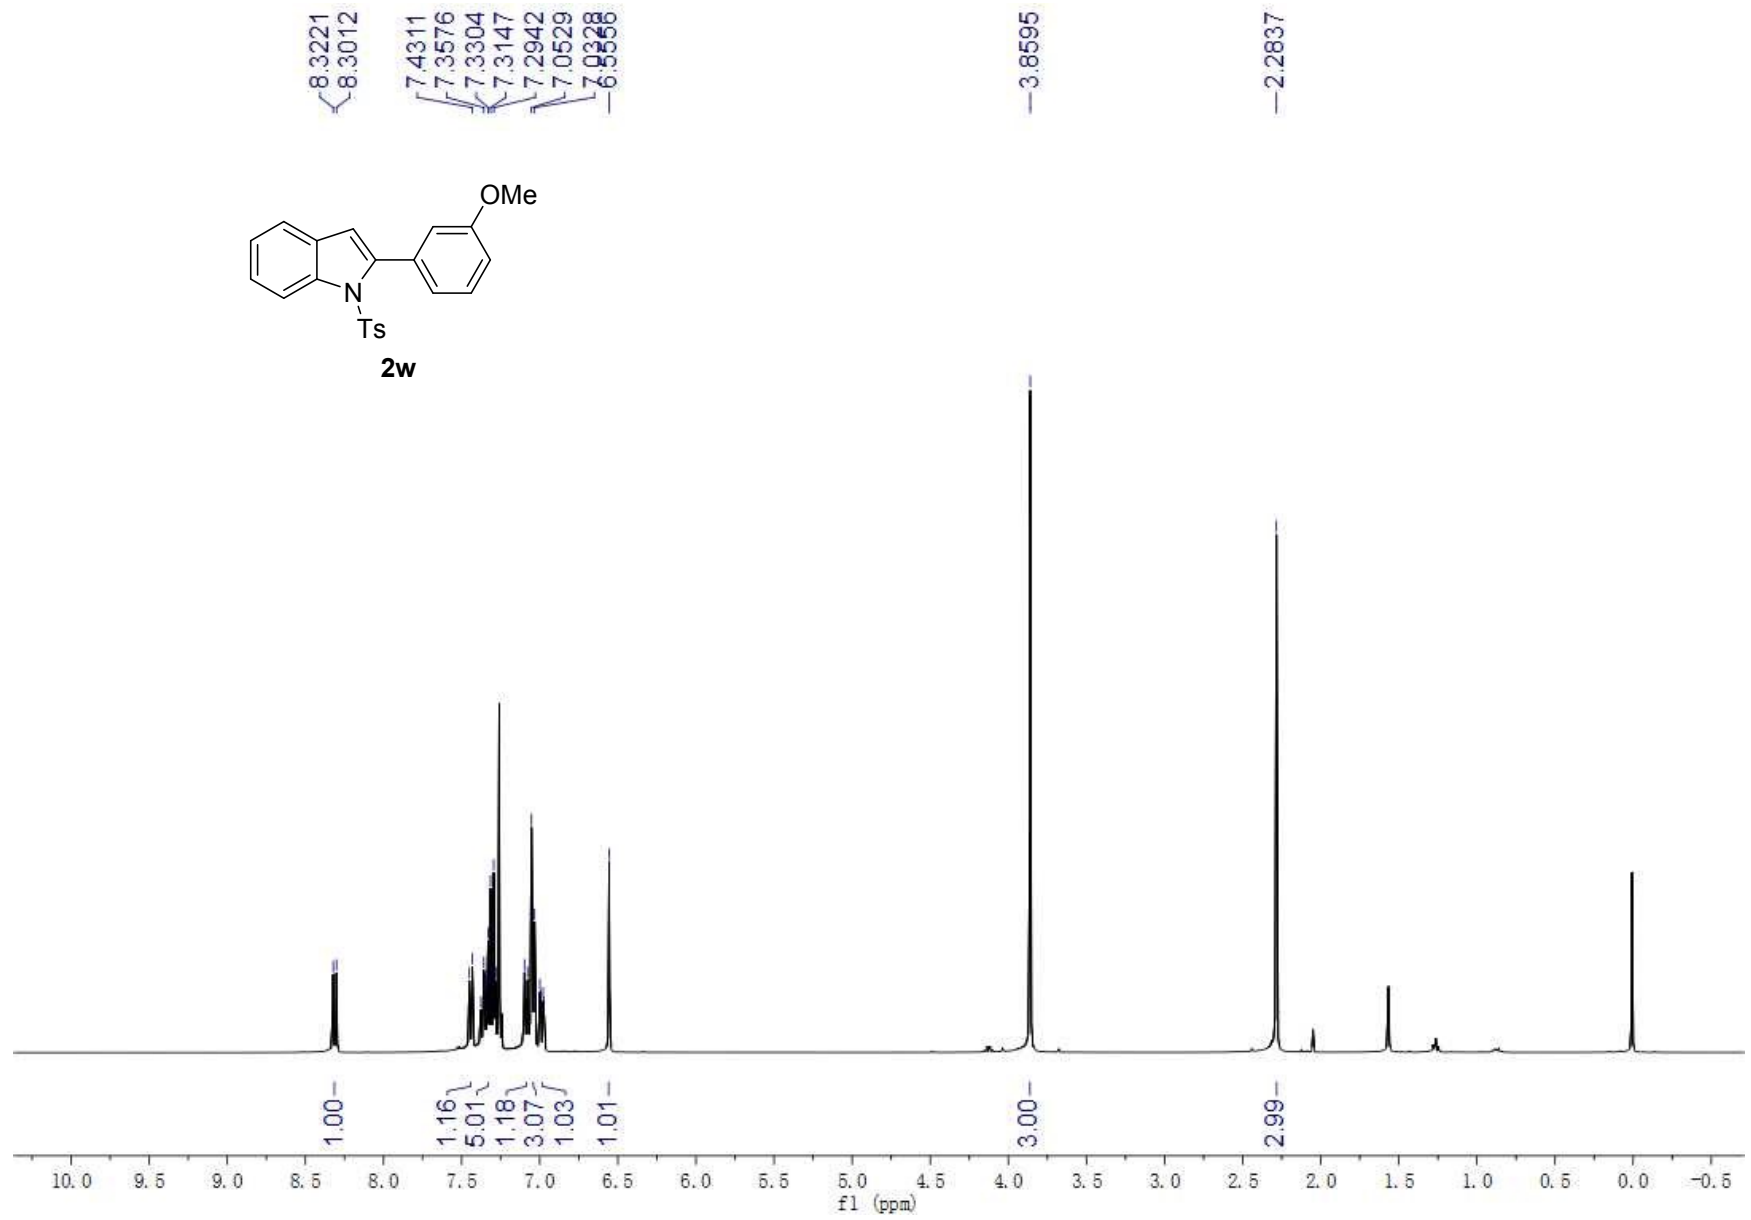

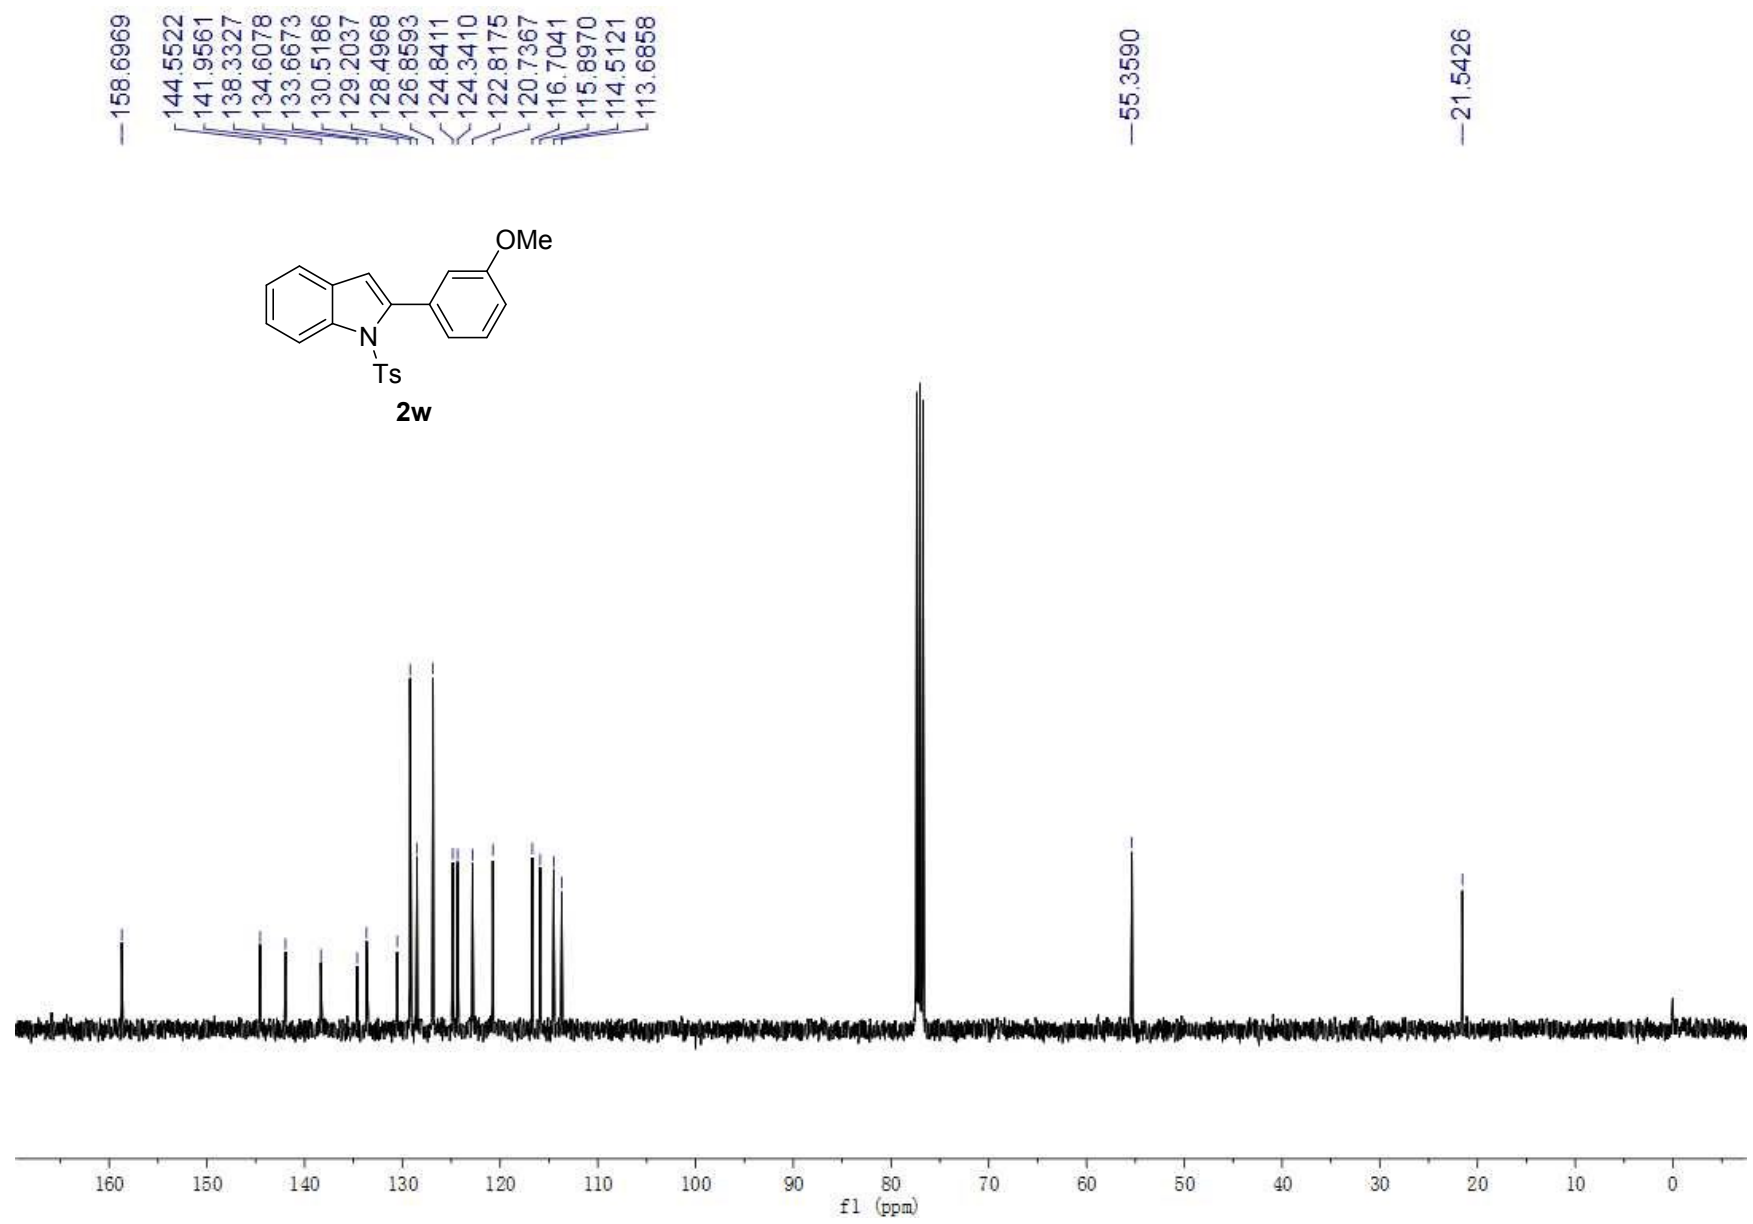

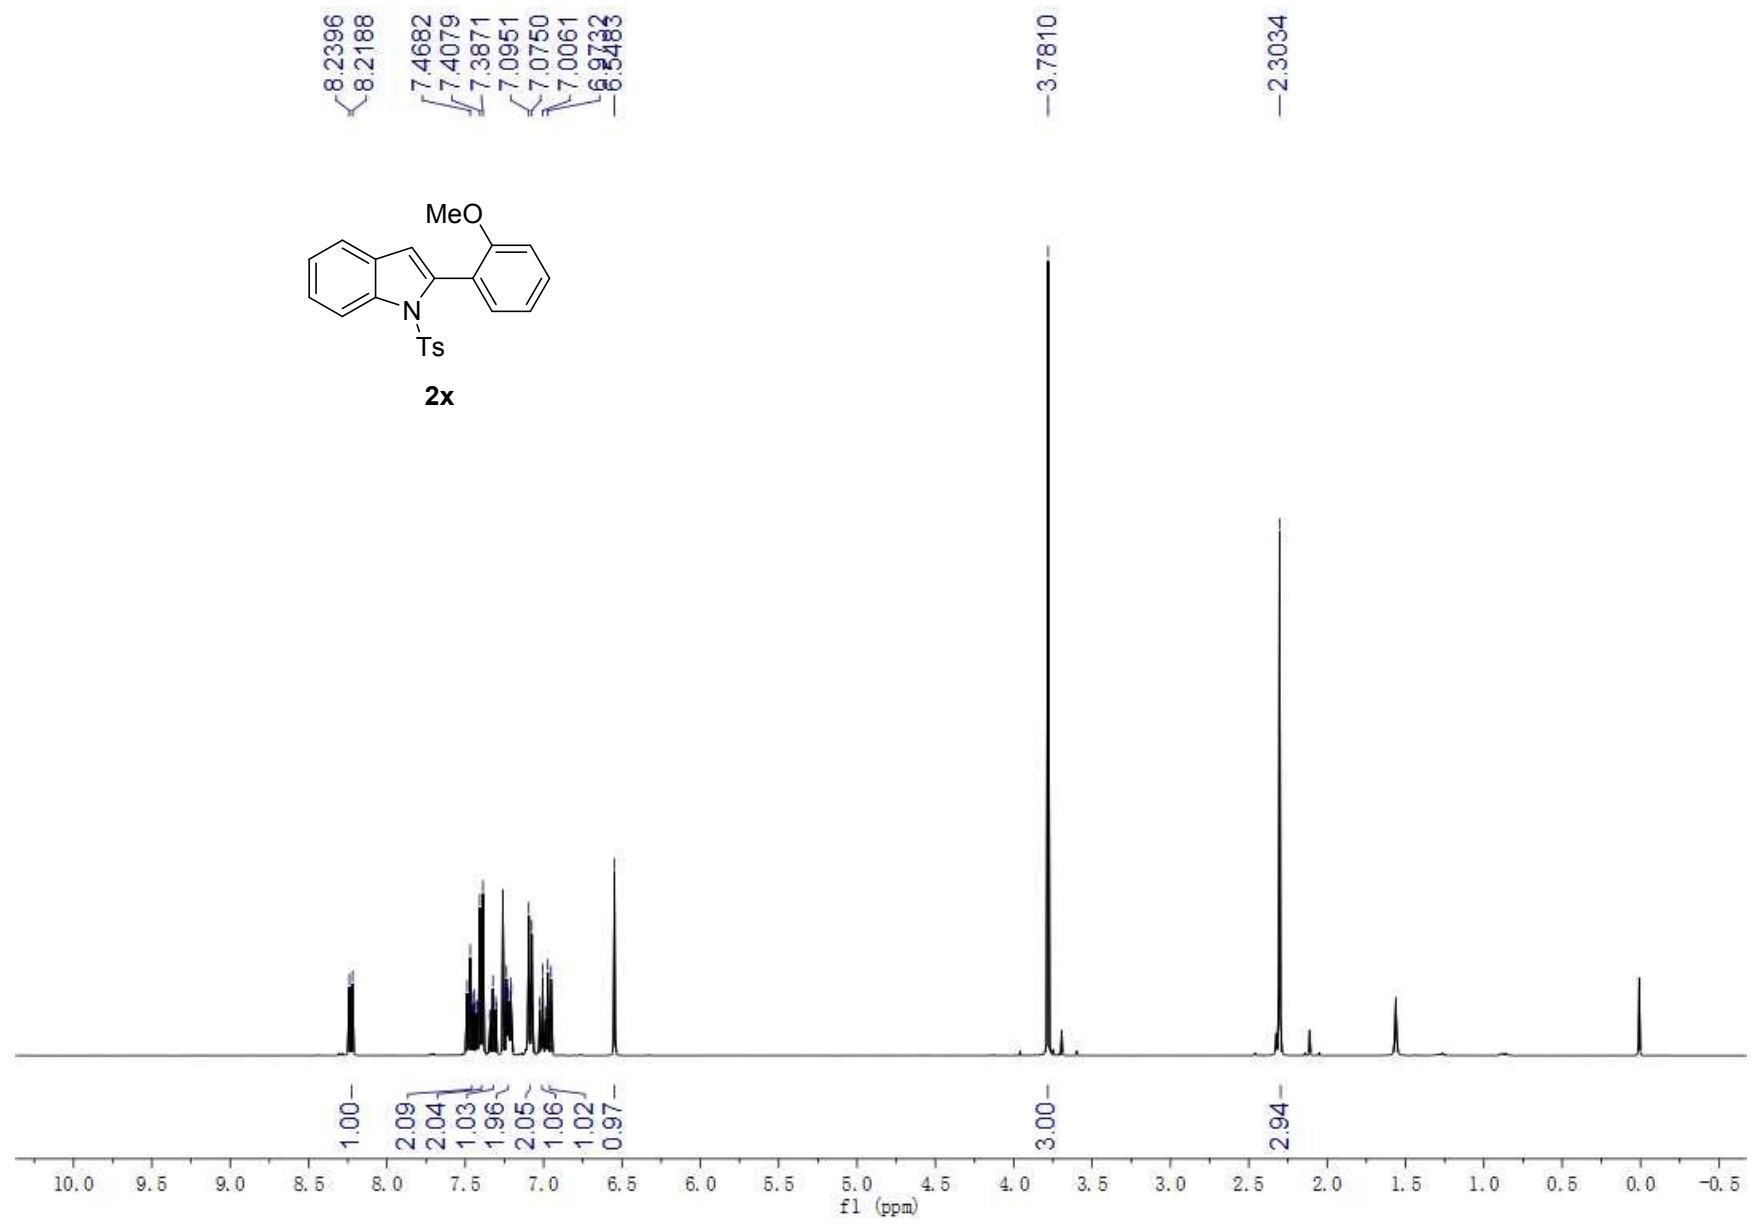

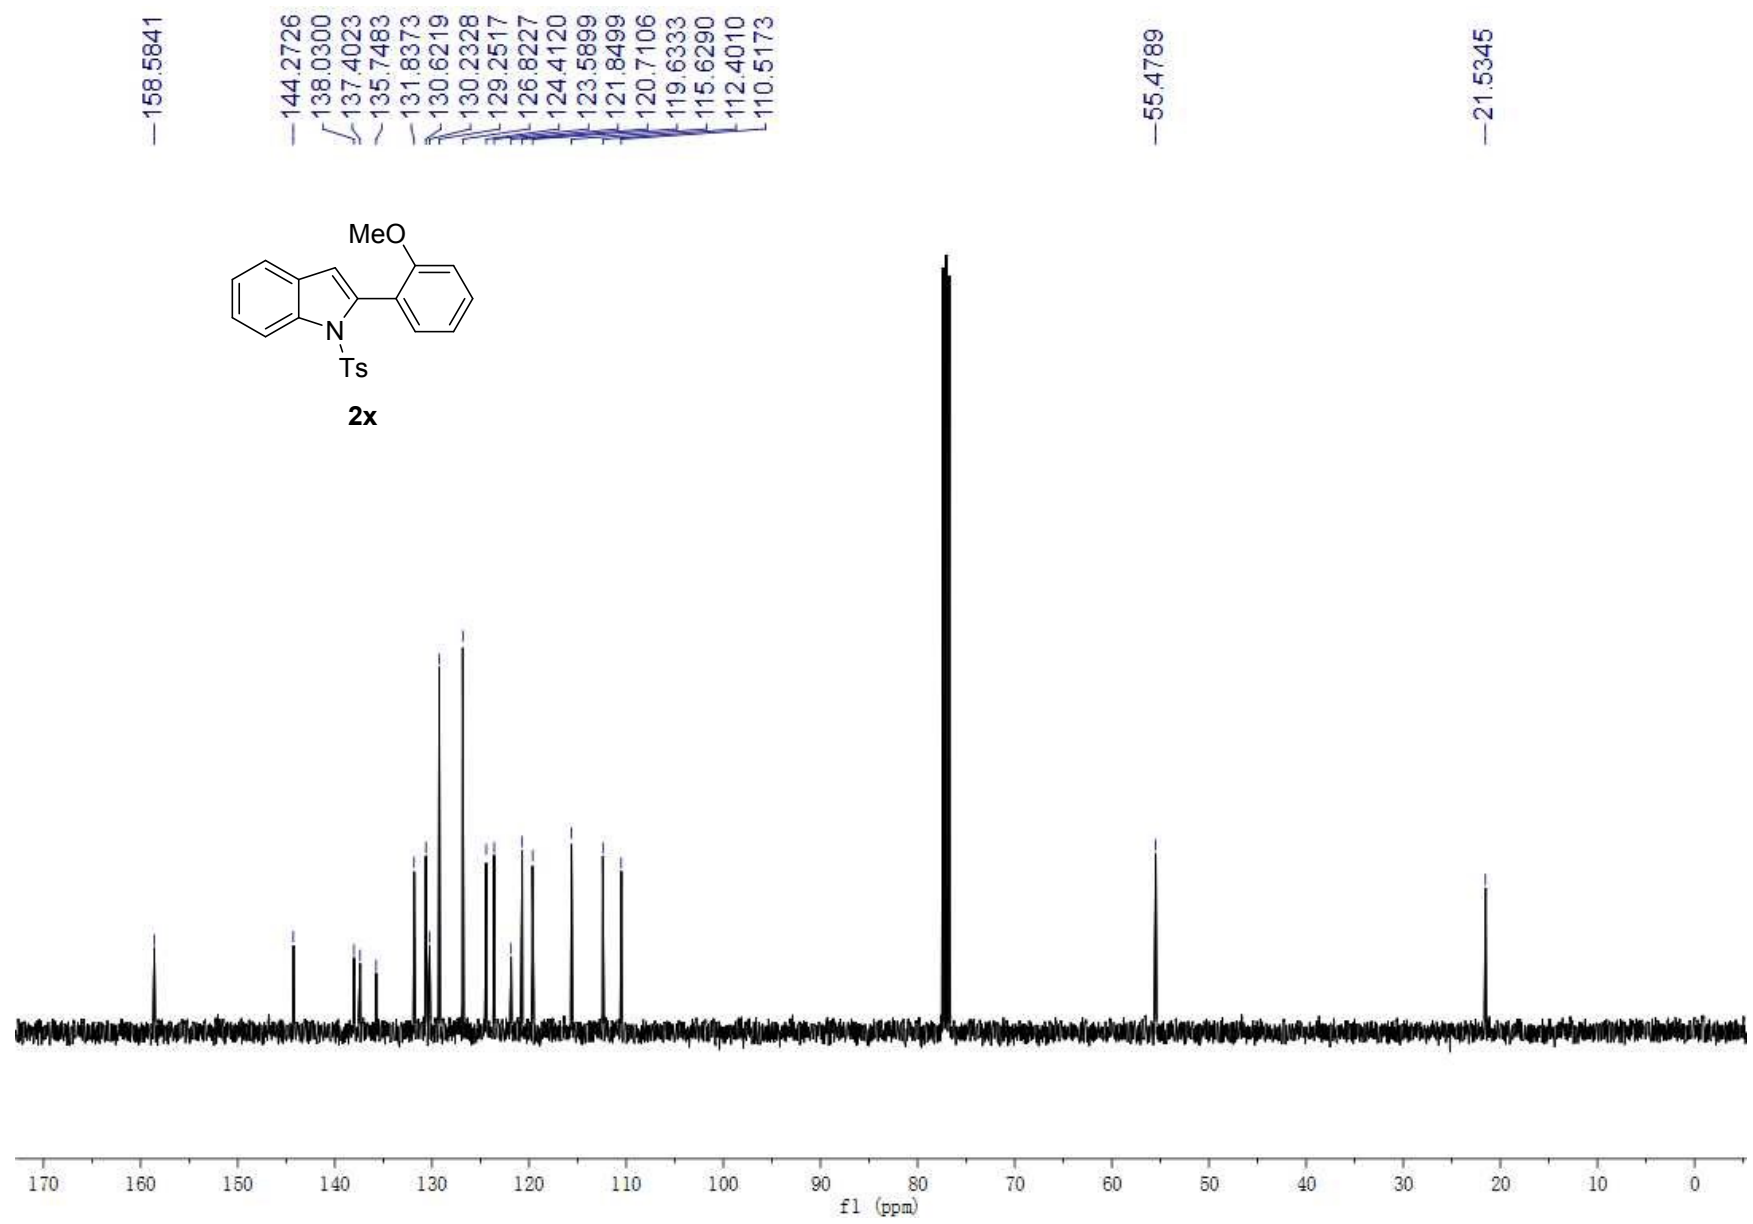

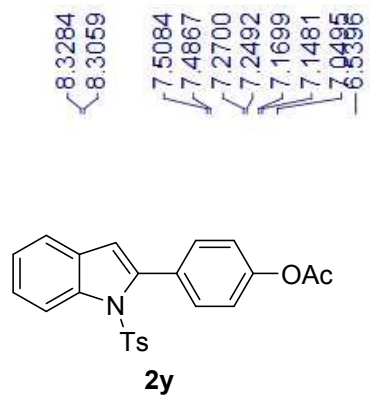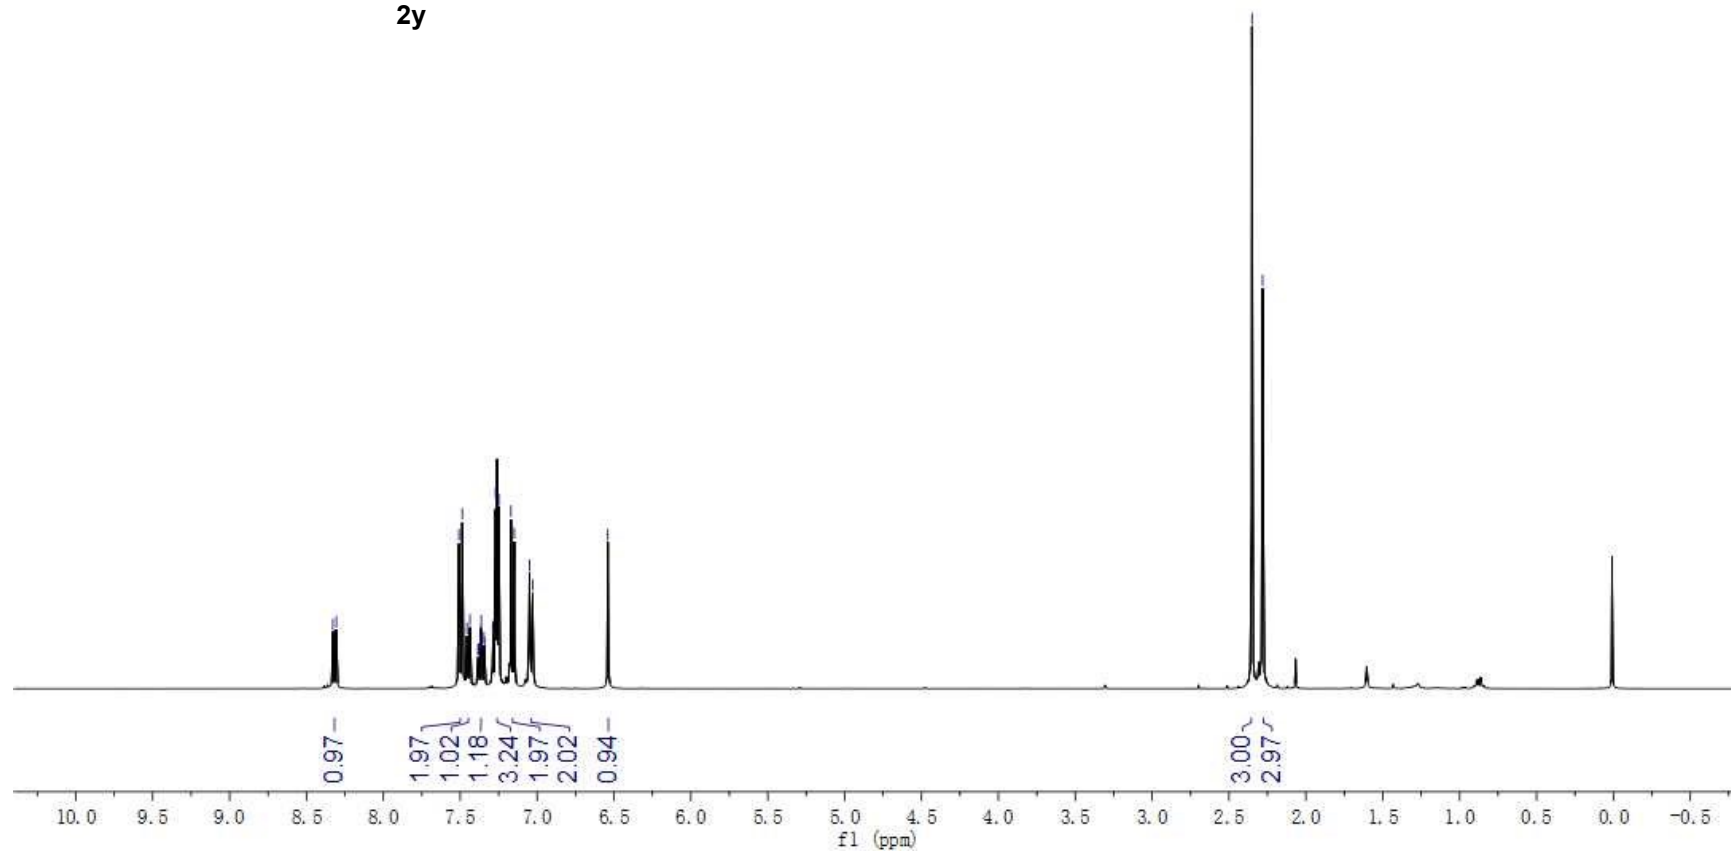



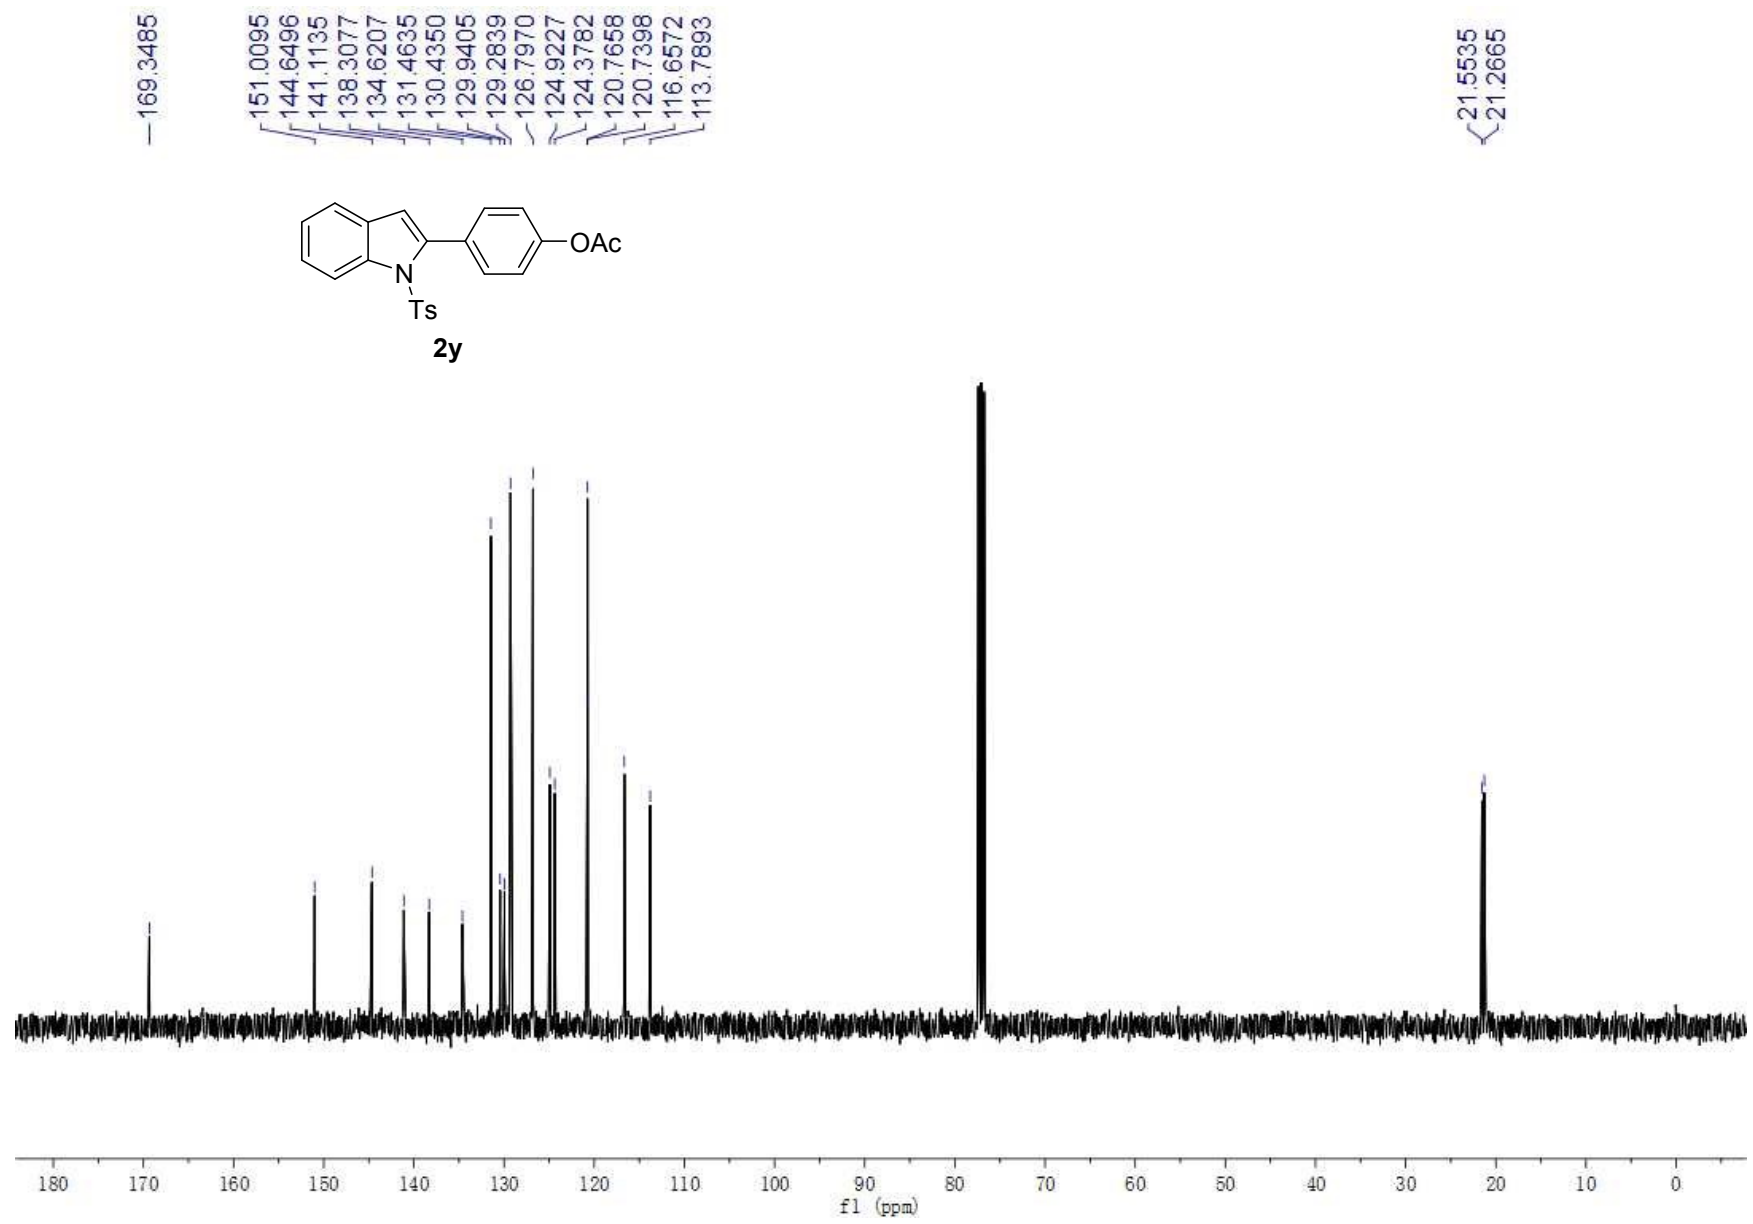

8.3283  
8.3264  
8.3073  
8.3054  
7.3881  
7.3334  
7.3121  
7.3052  
7.0557  
6.8296

-2.2813

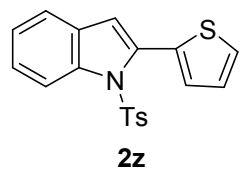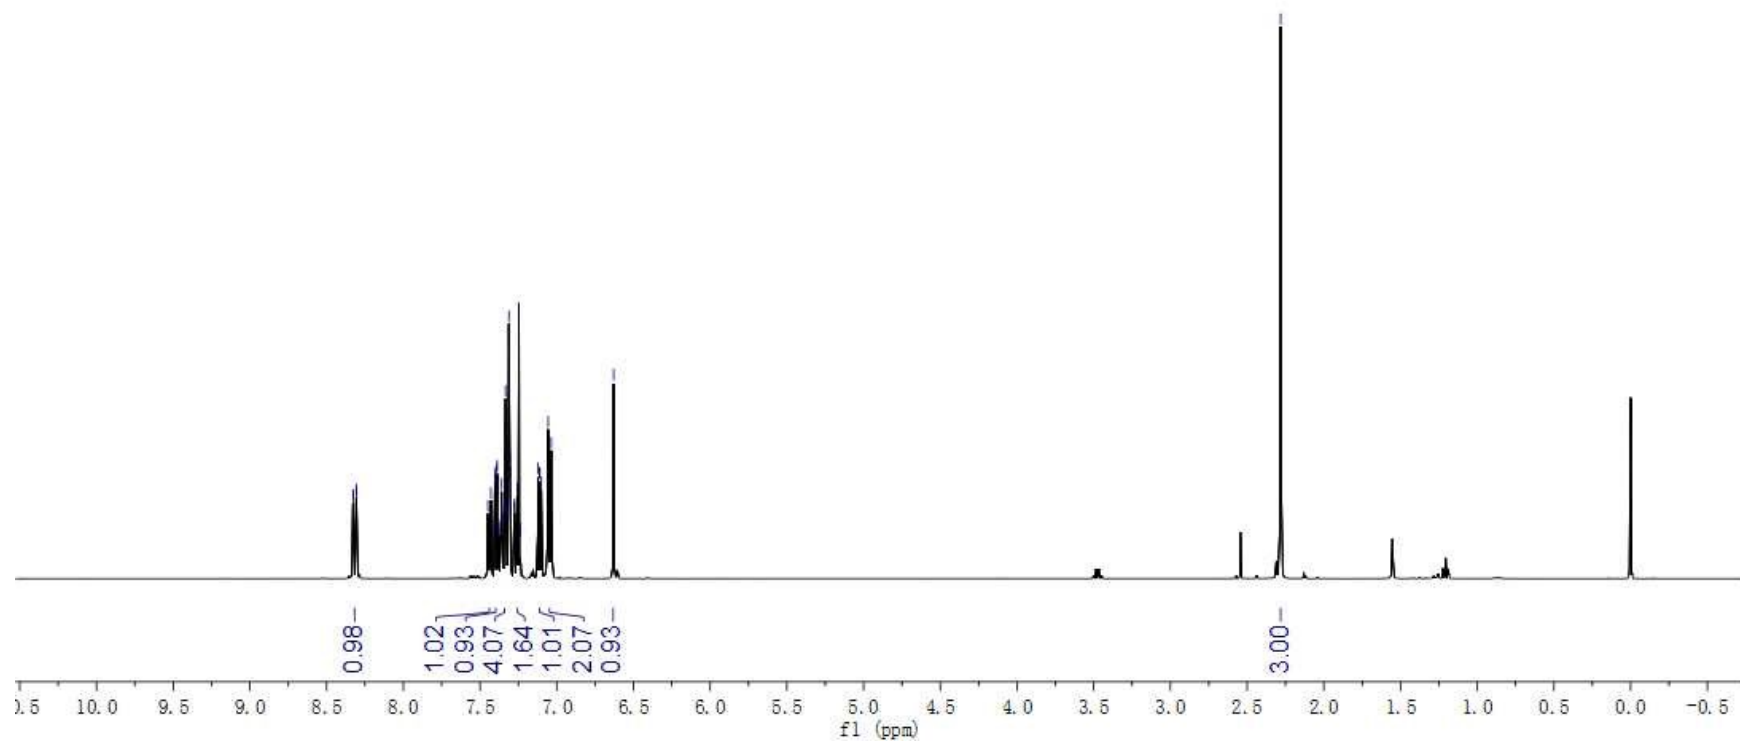

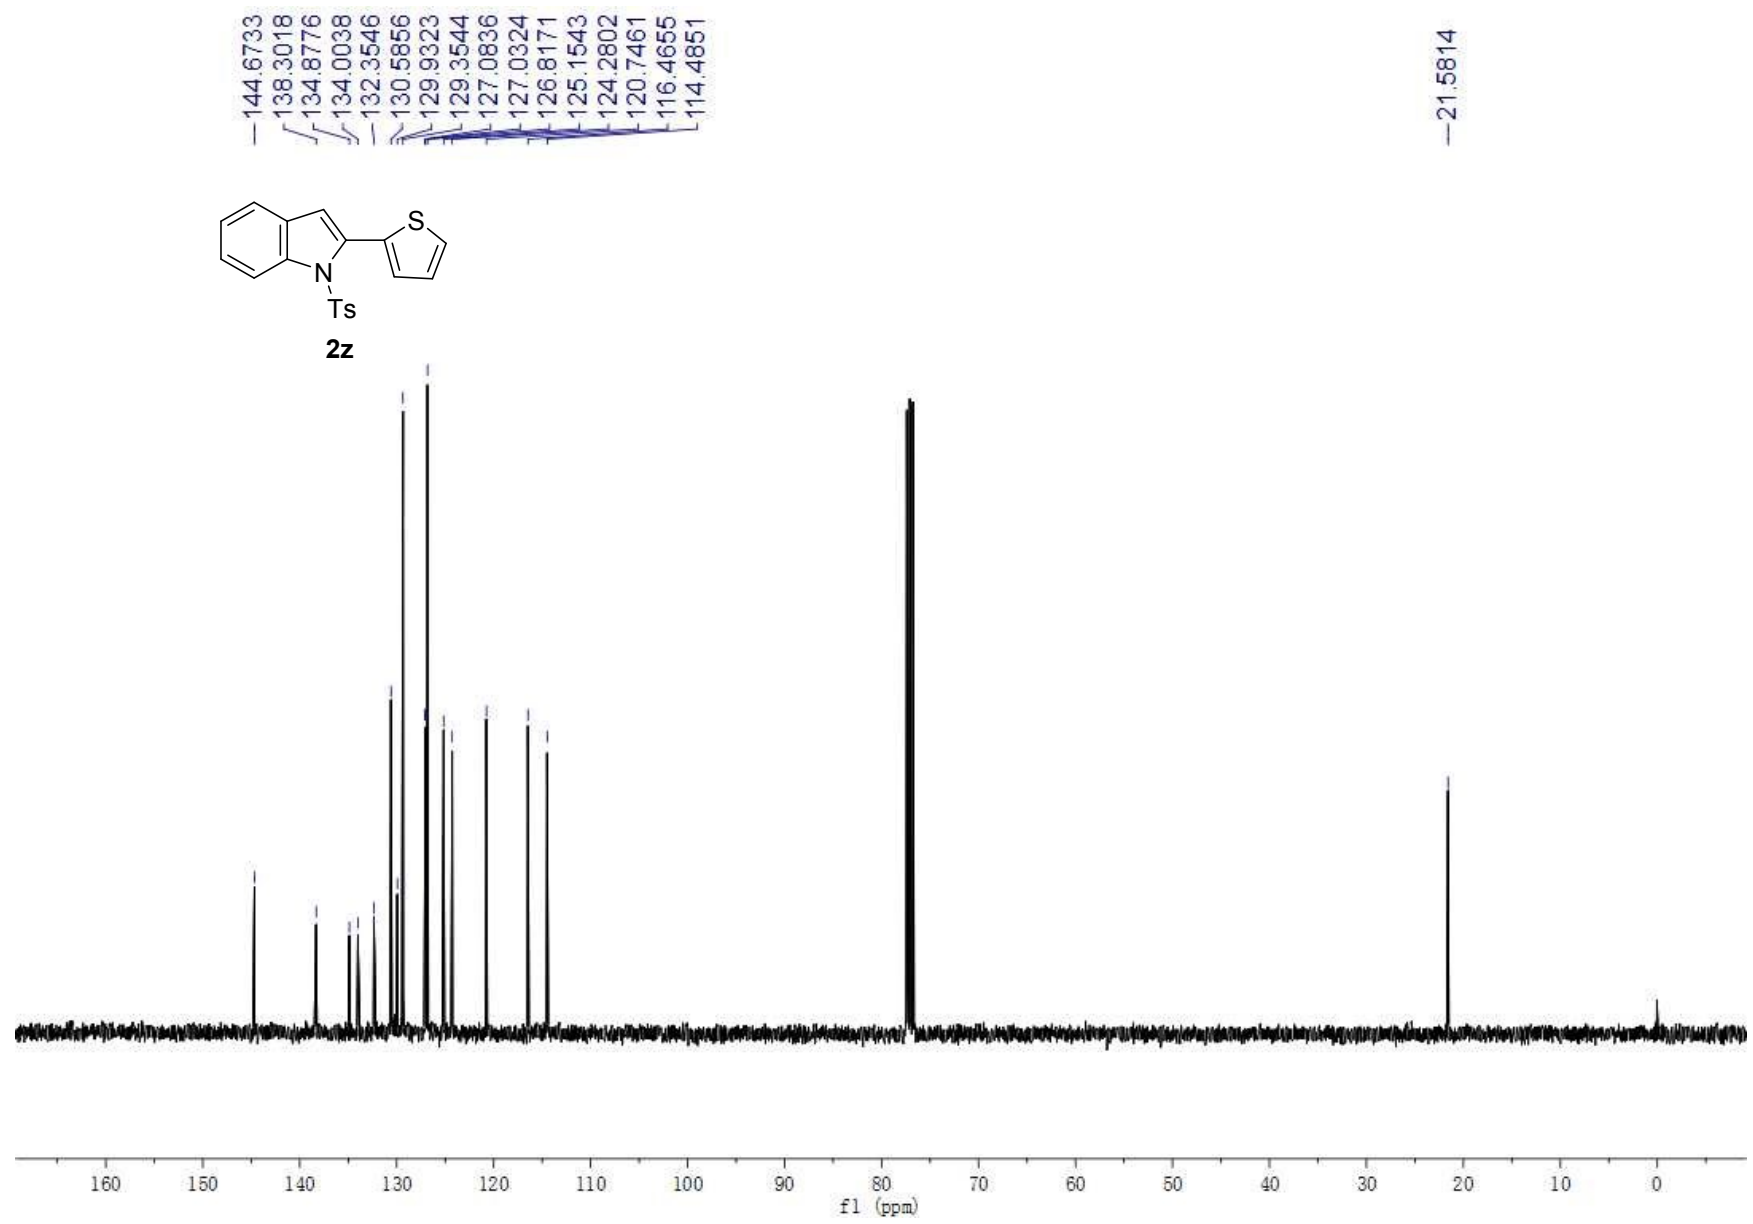

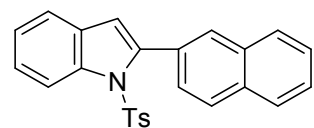

**2aa**

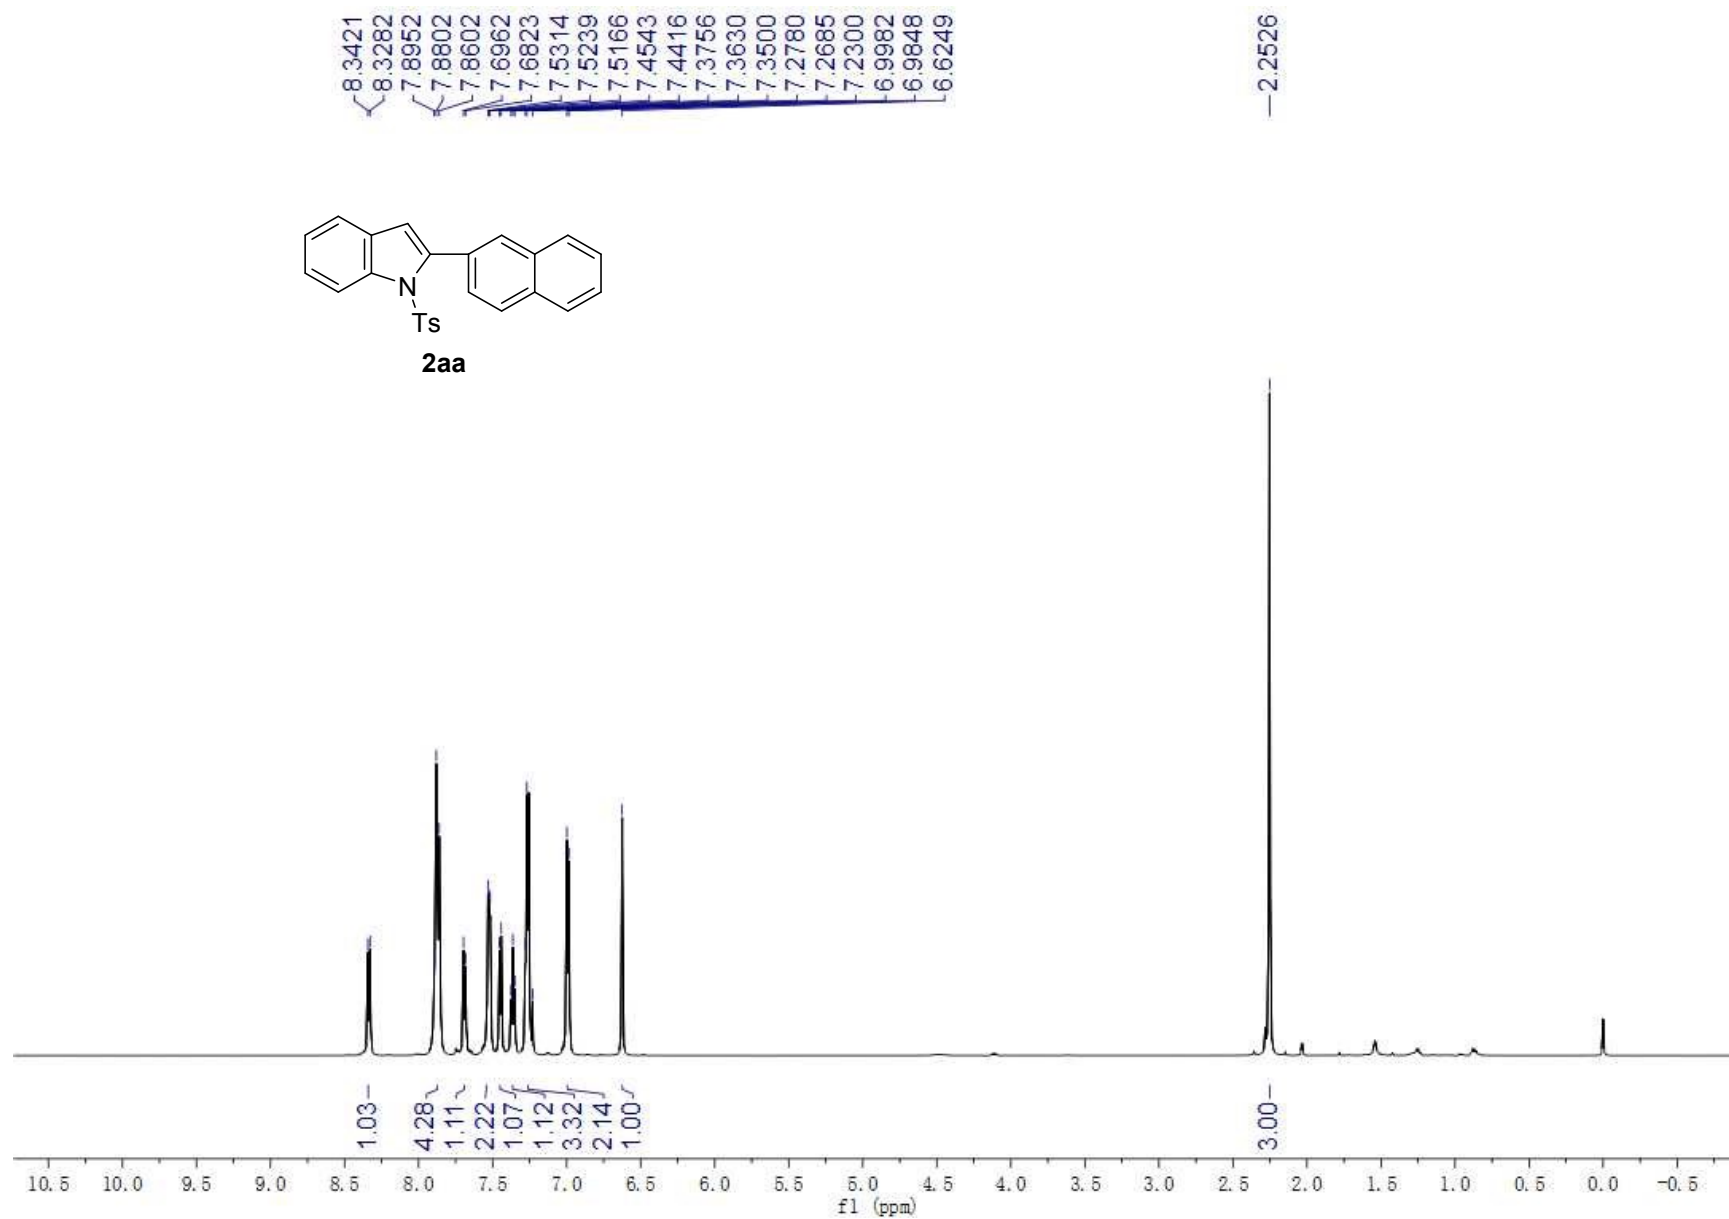

142.1774  
138.4619  
134.7068  
134.6770  
133.3068  
132.7026  
130.6748  
130.1831  
129.2100  
128.8329  
128.5715  
128.2326  
127.8565  
126.8643  
126.7927  
126.6336  
126.3542  
124.9018  
124.3976  
120.7671  
116.7093  
114.1677

-21.5096

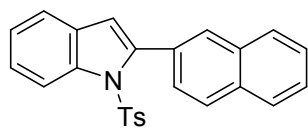

**2aa**

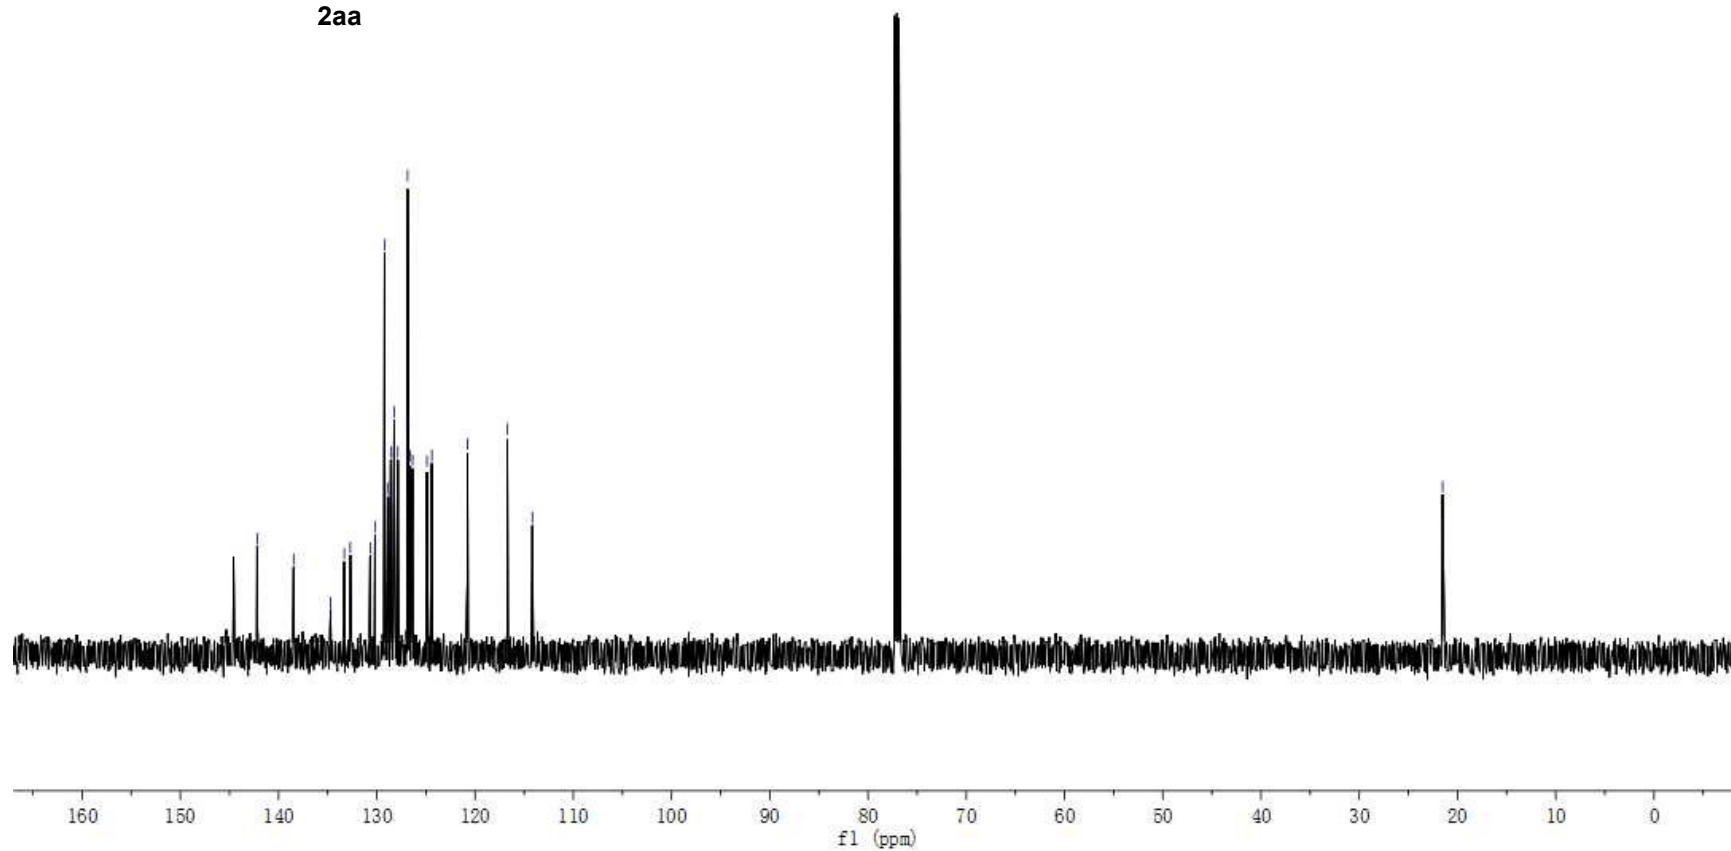

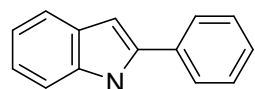

Ms

**2ab**

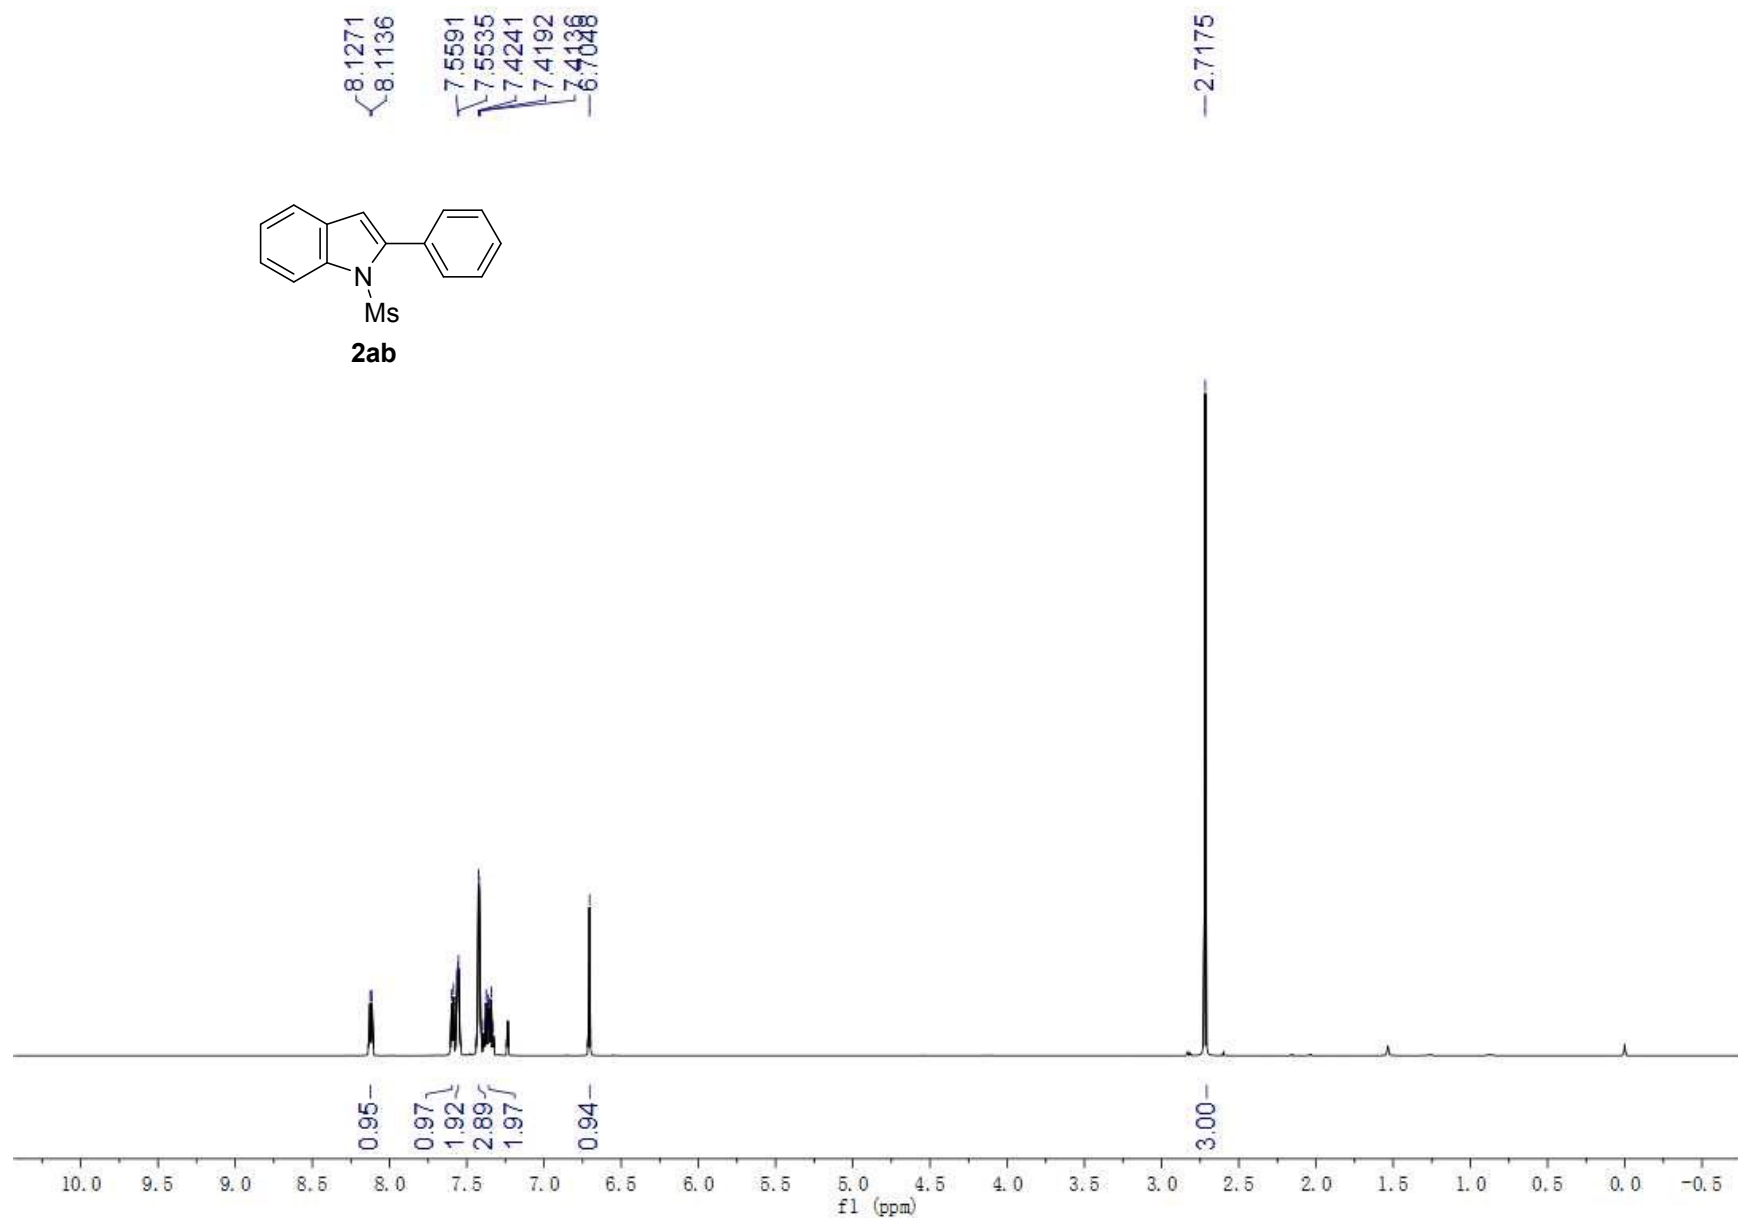

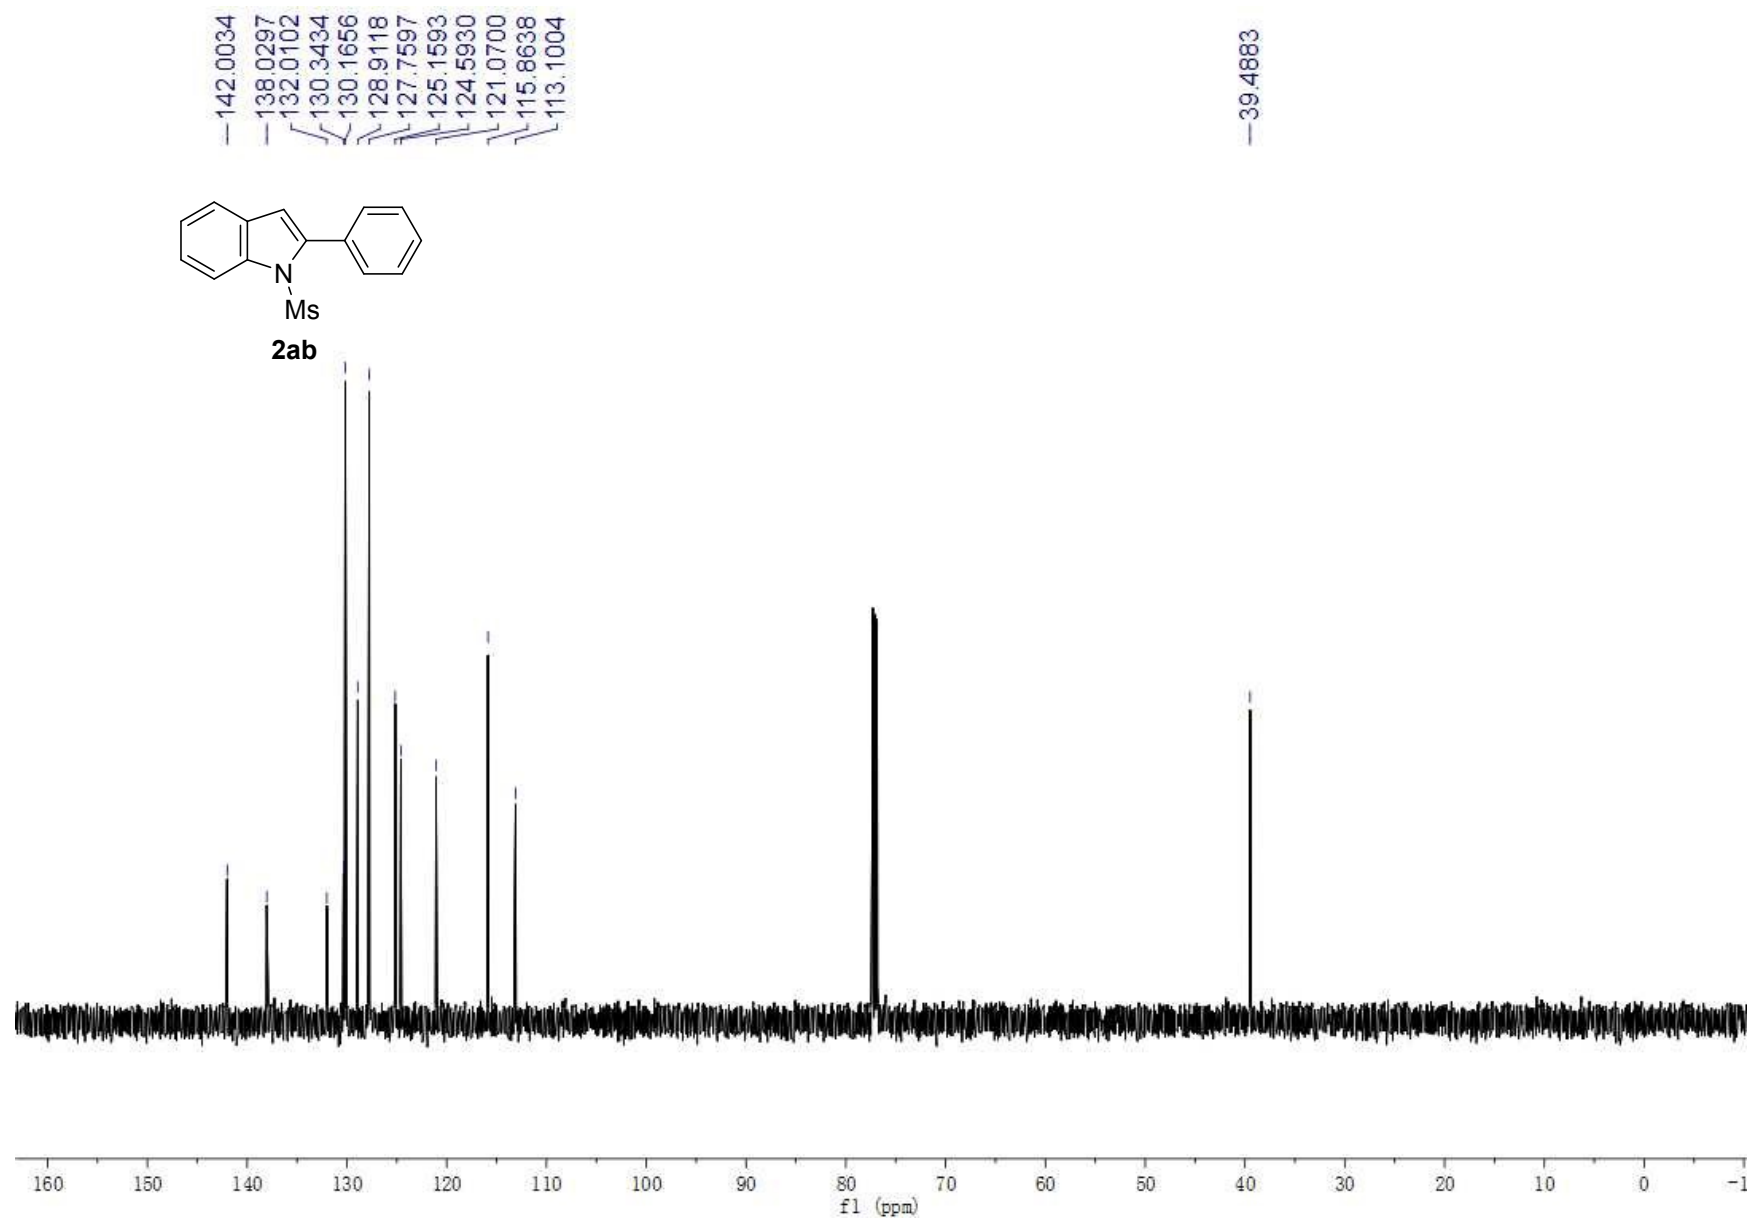

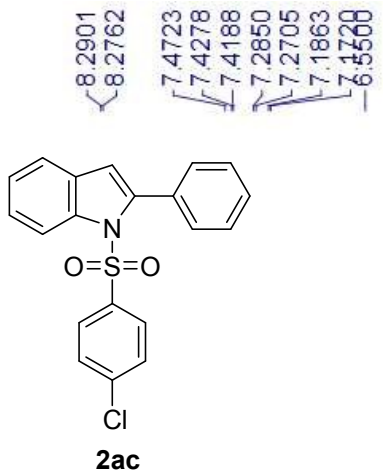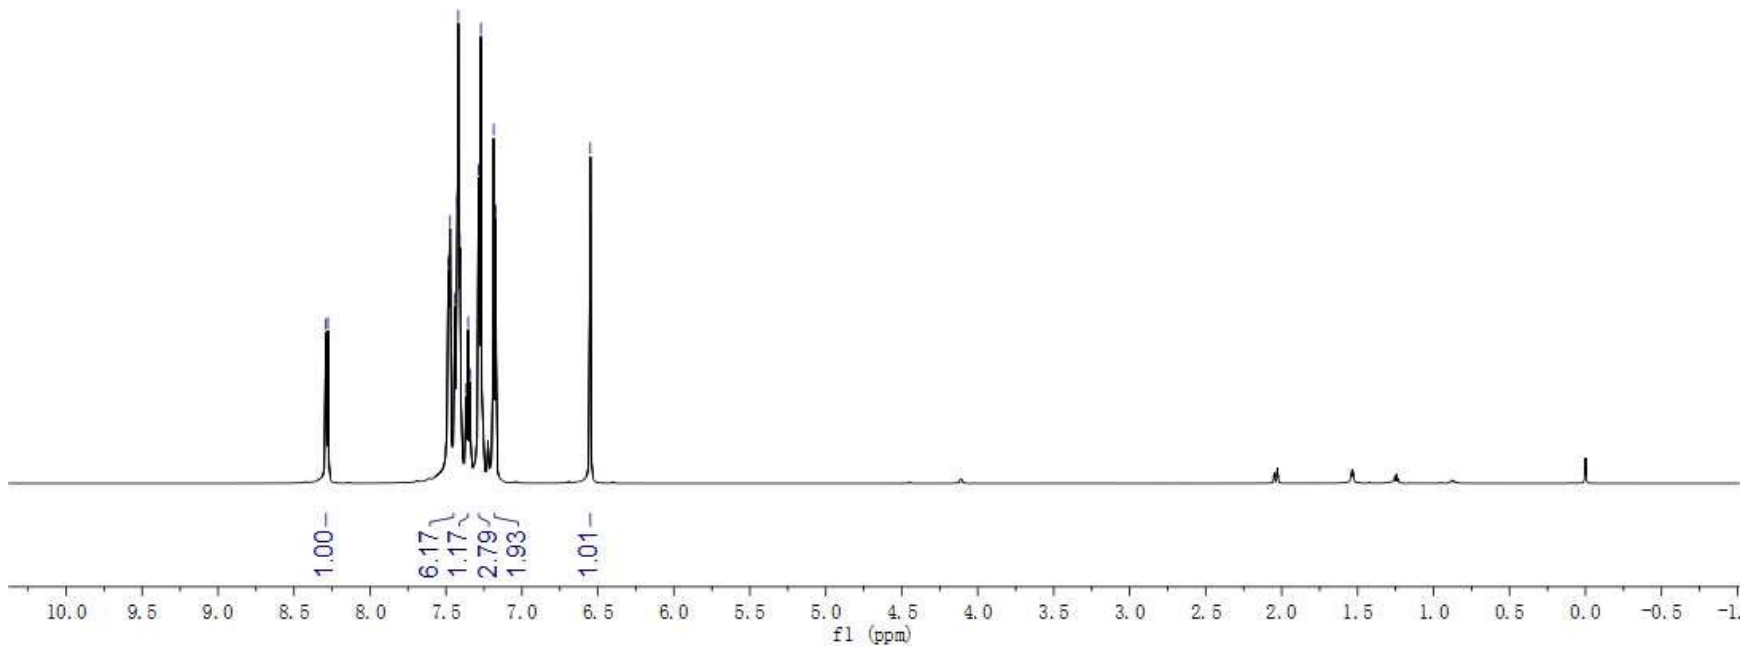



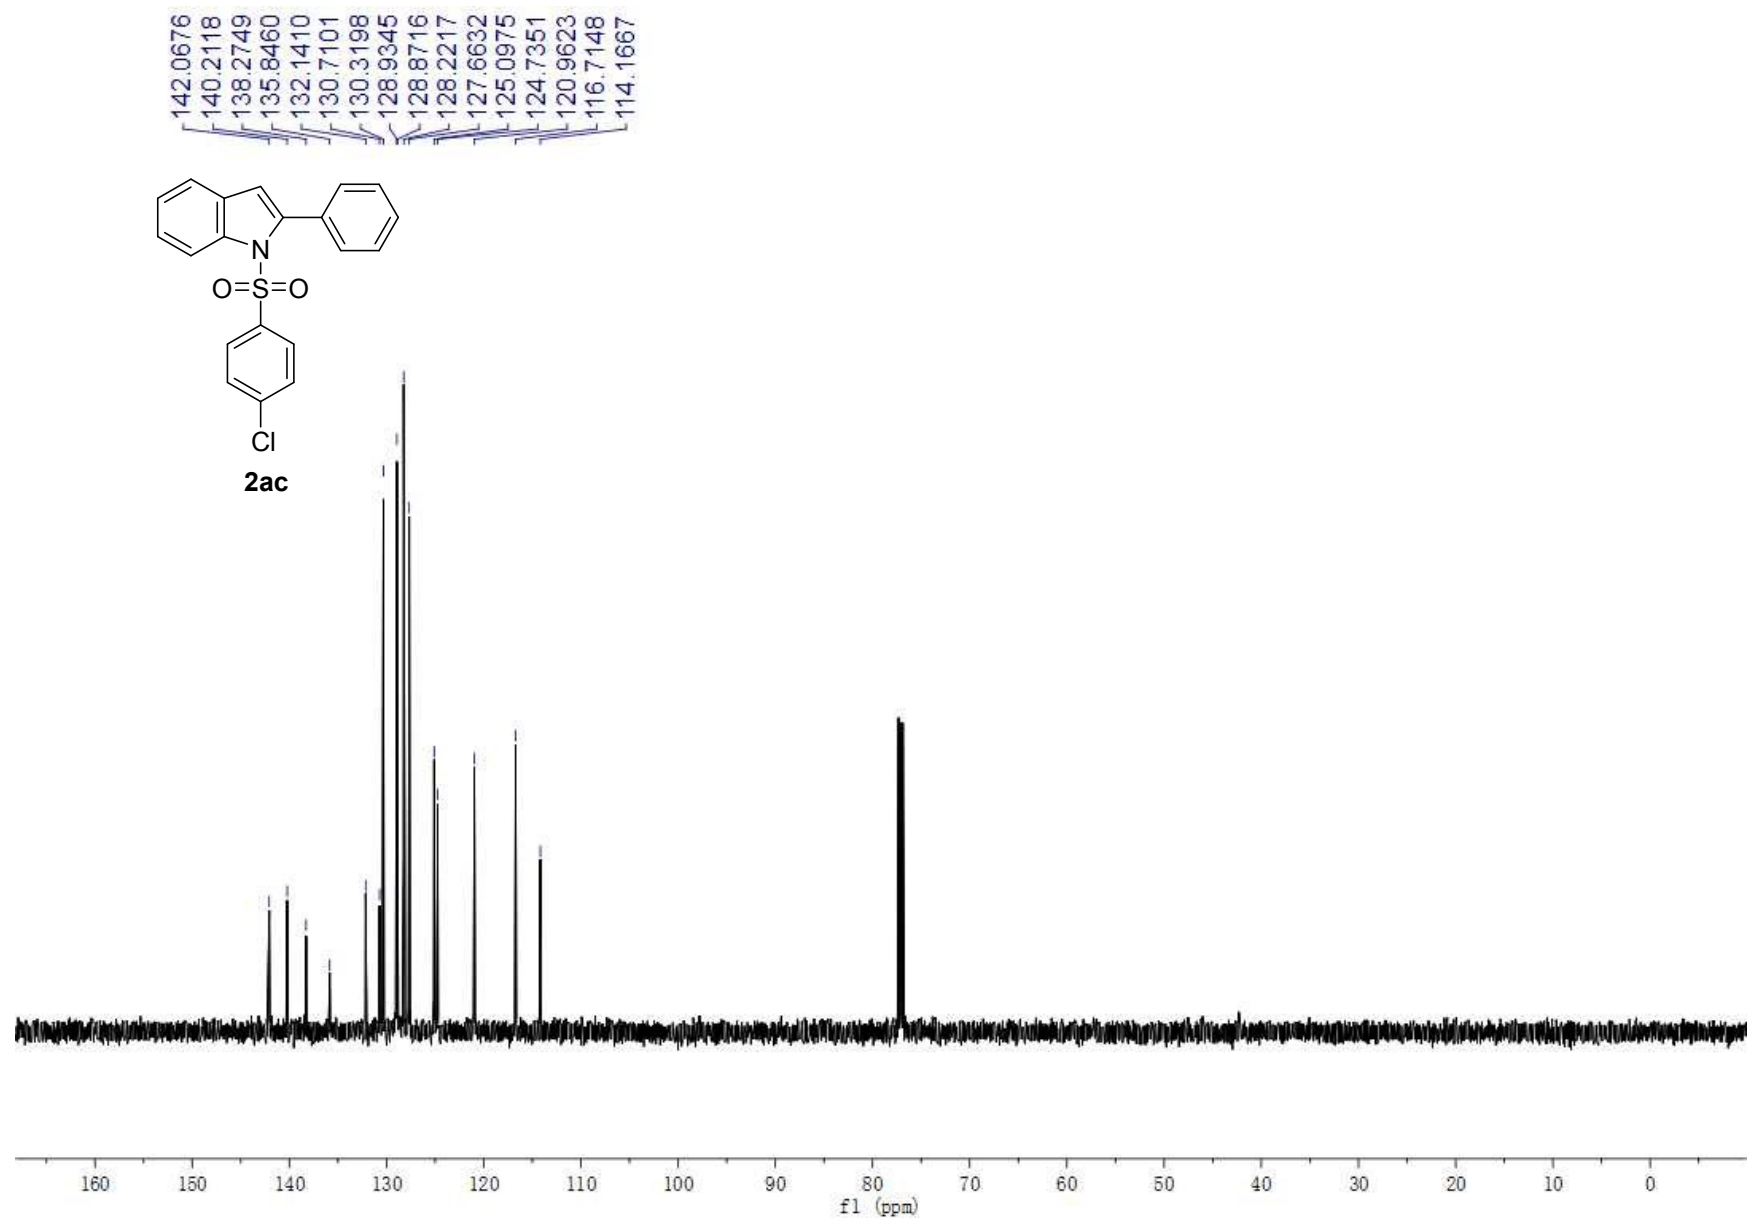

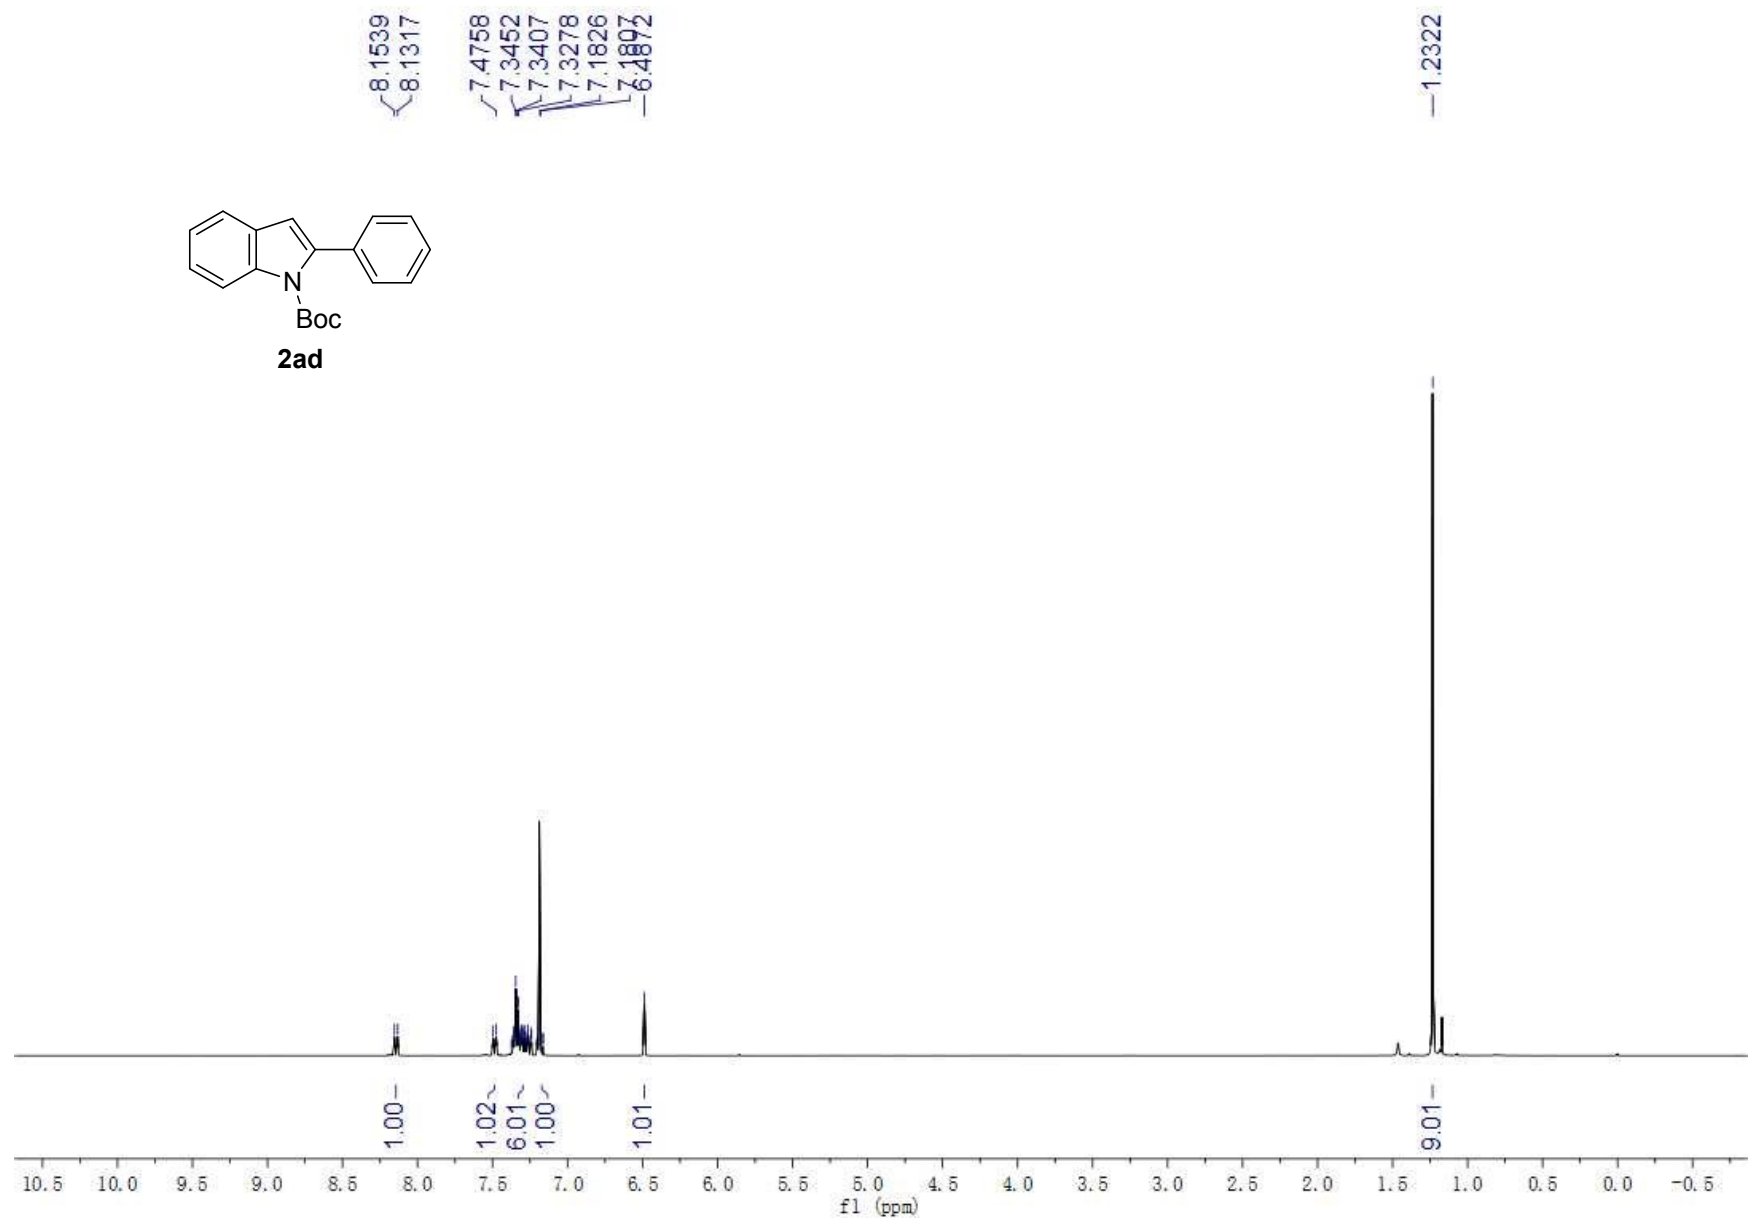

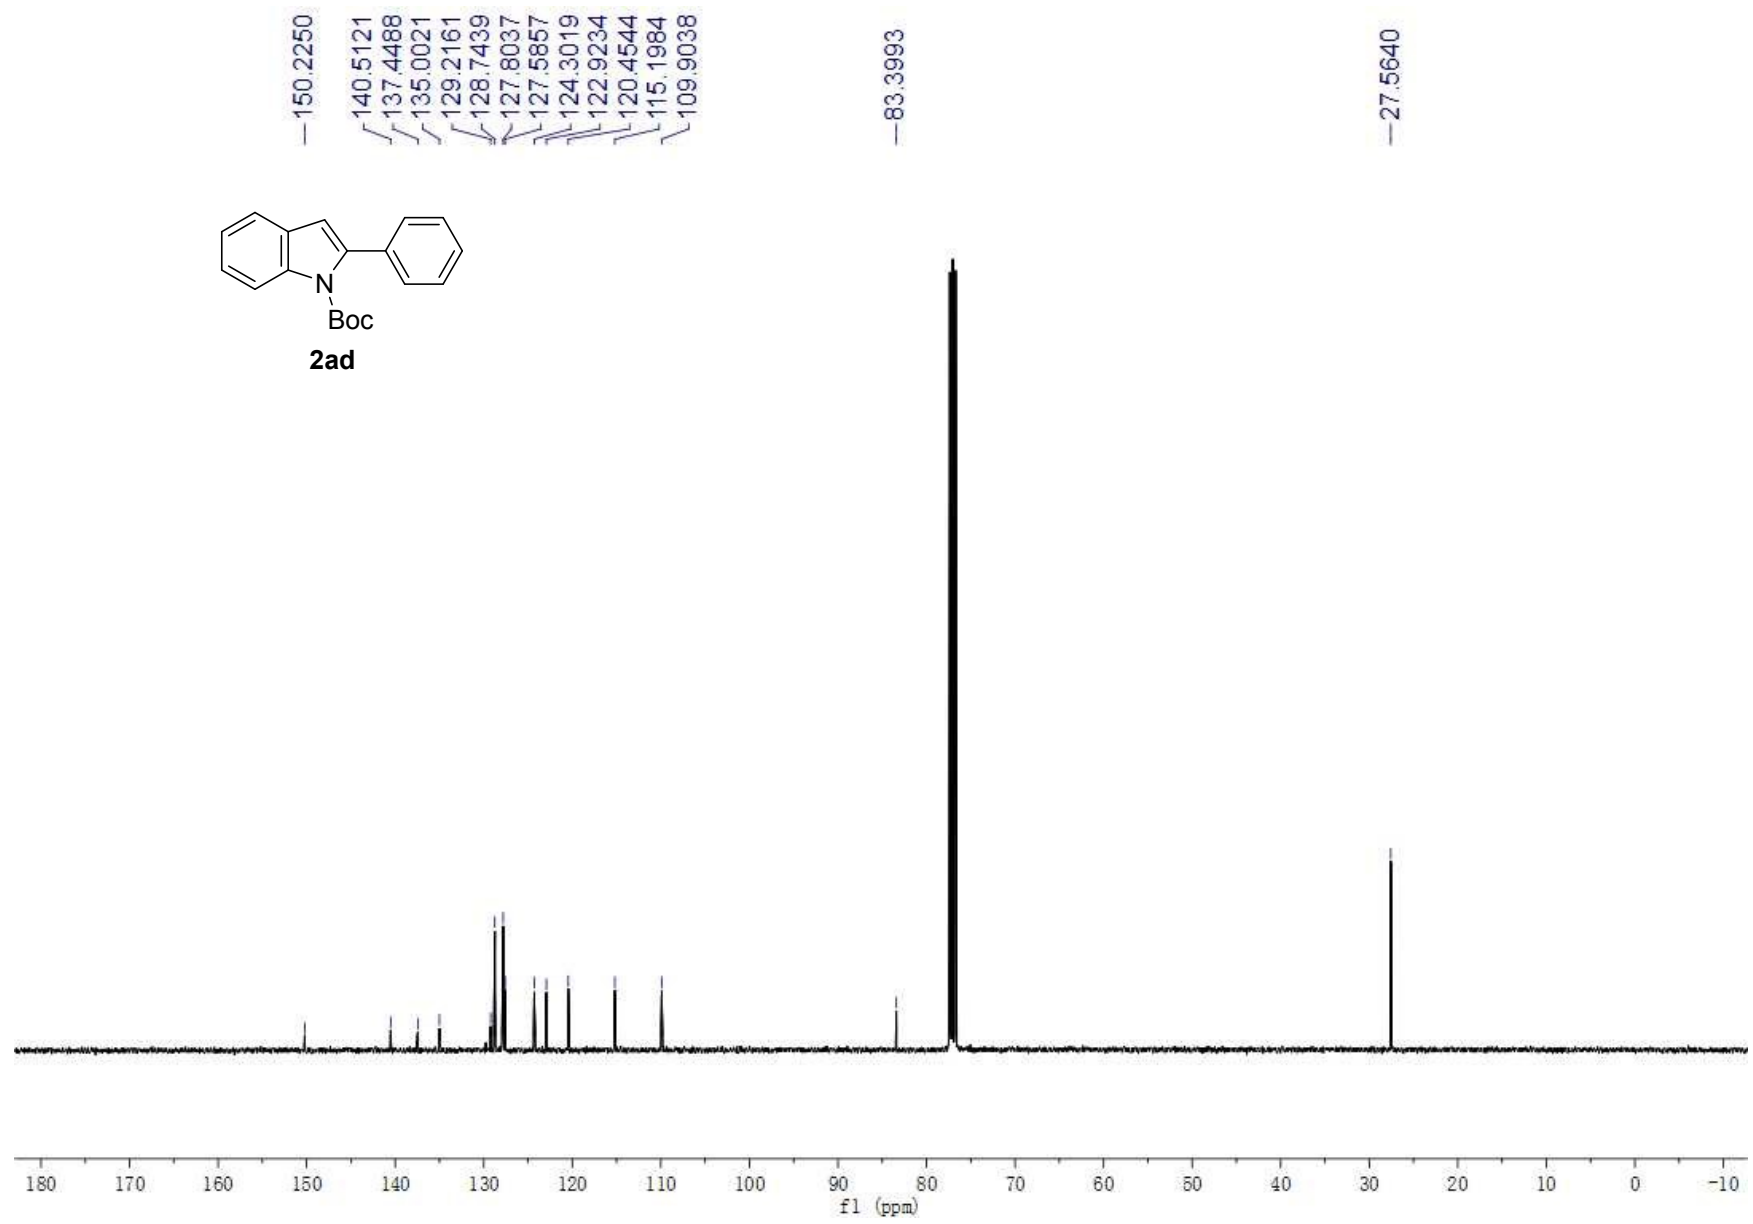

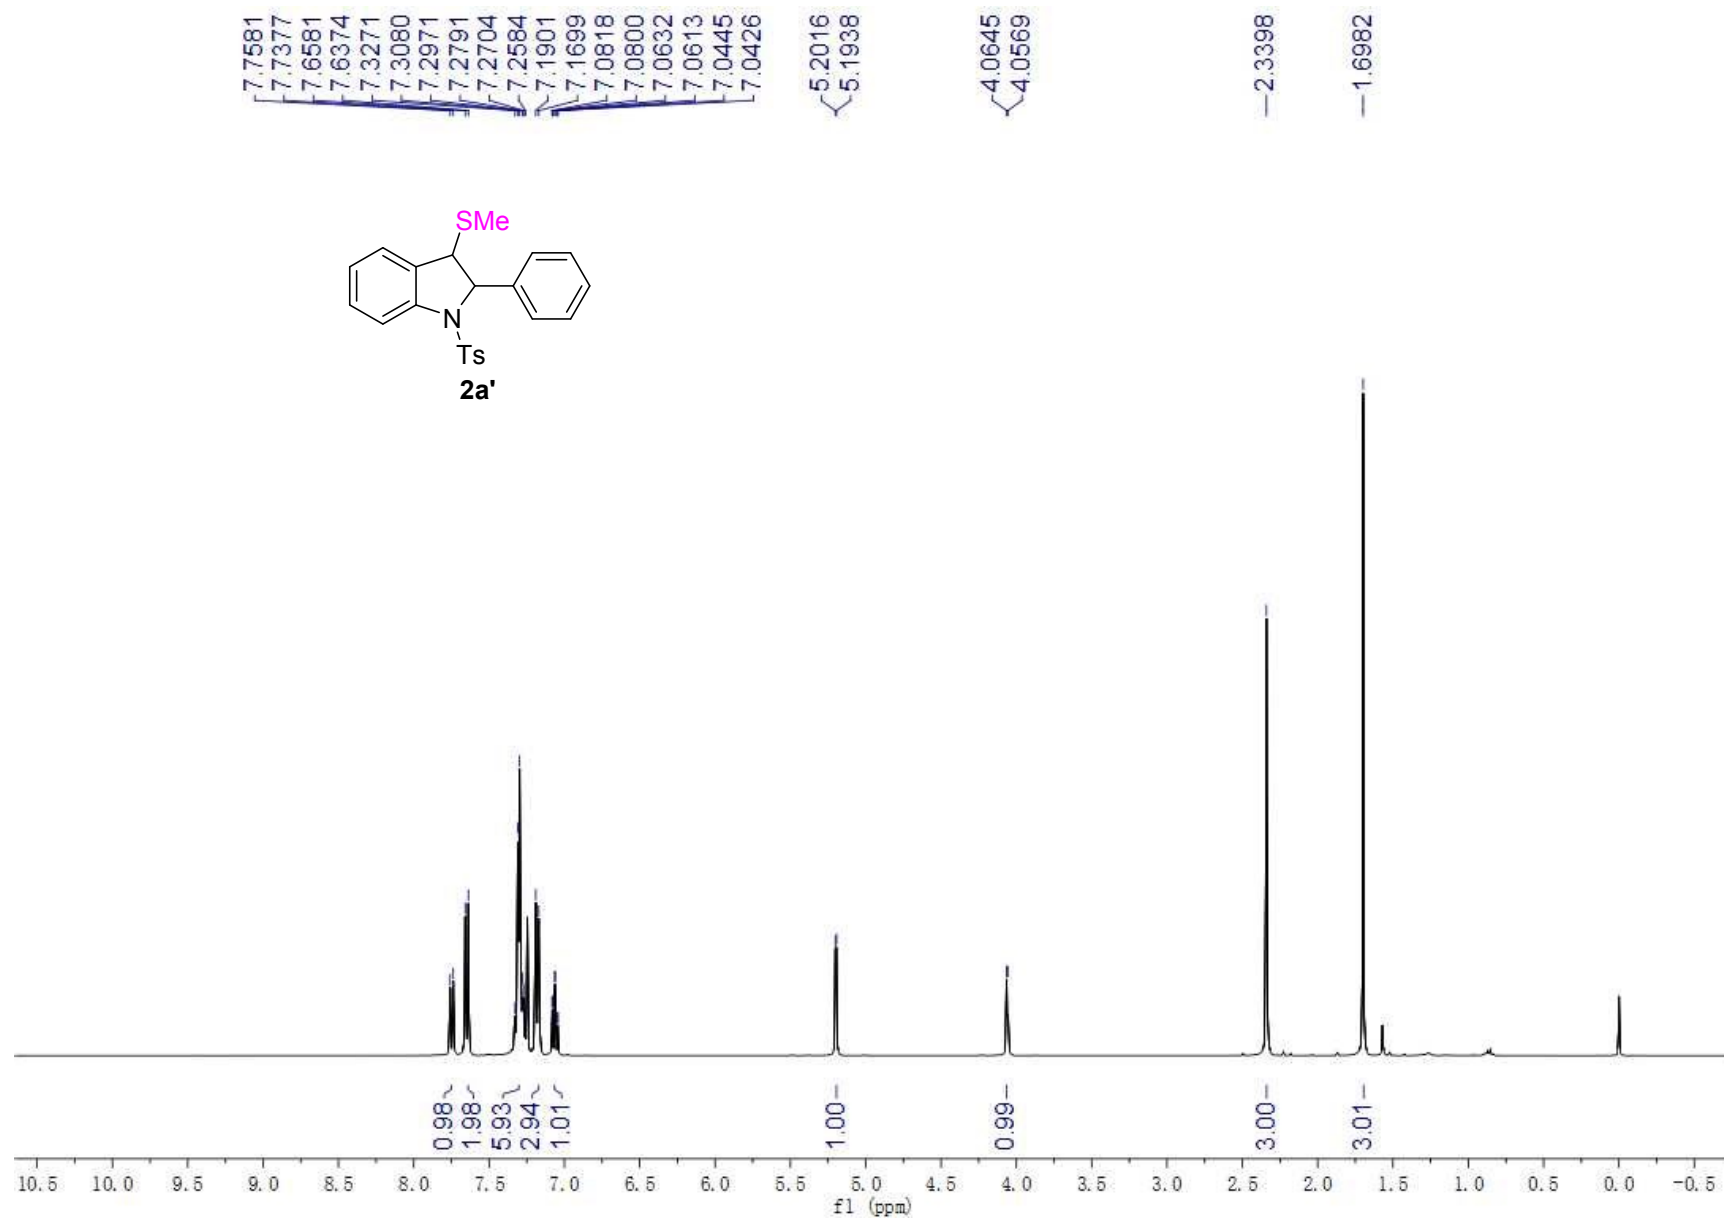

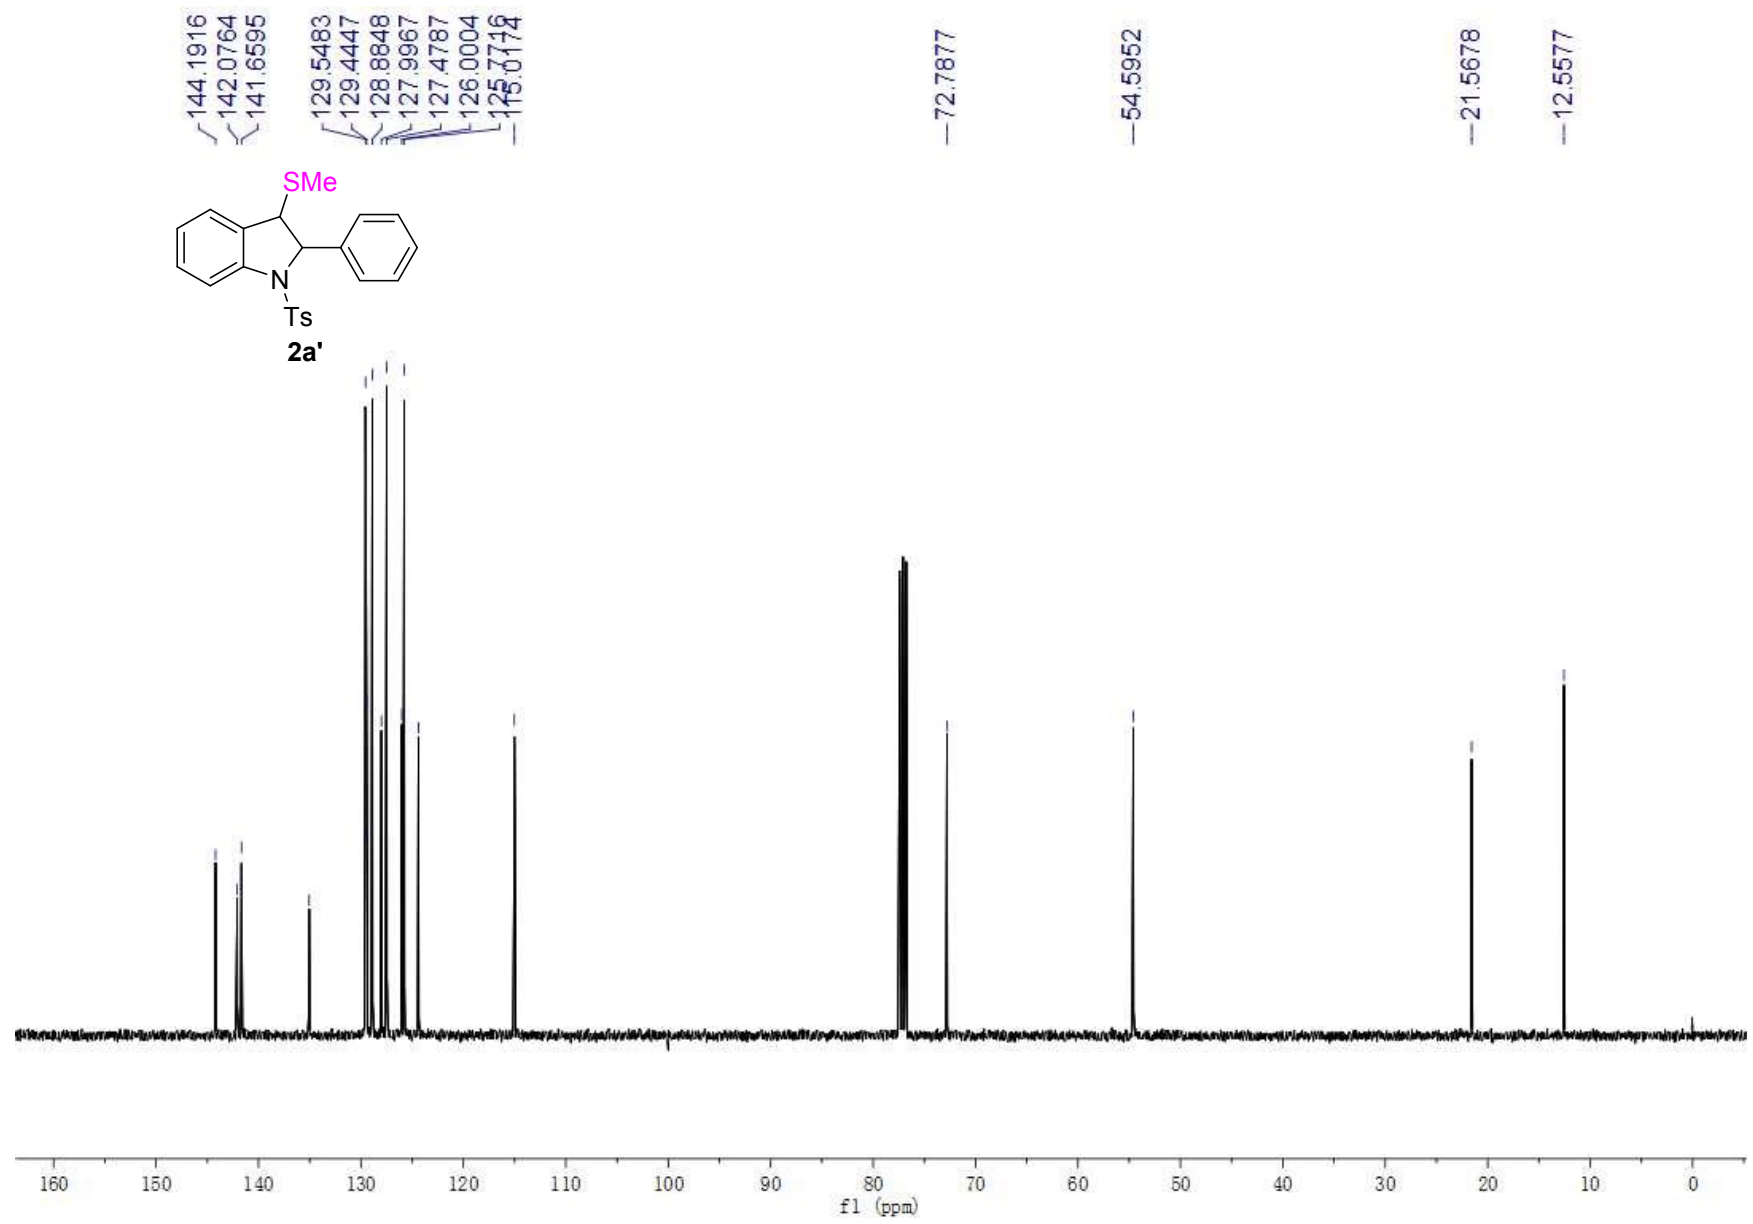

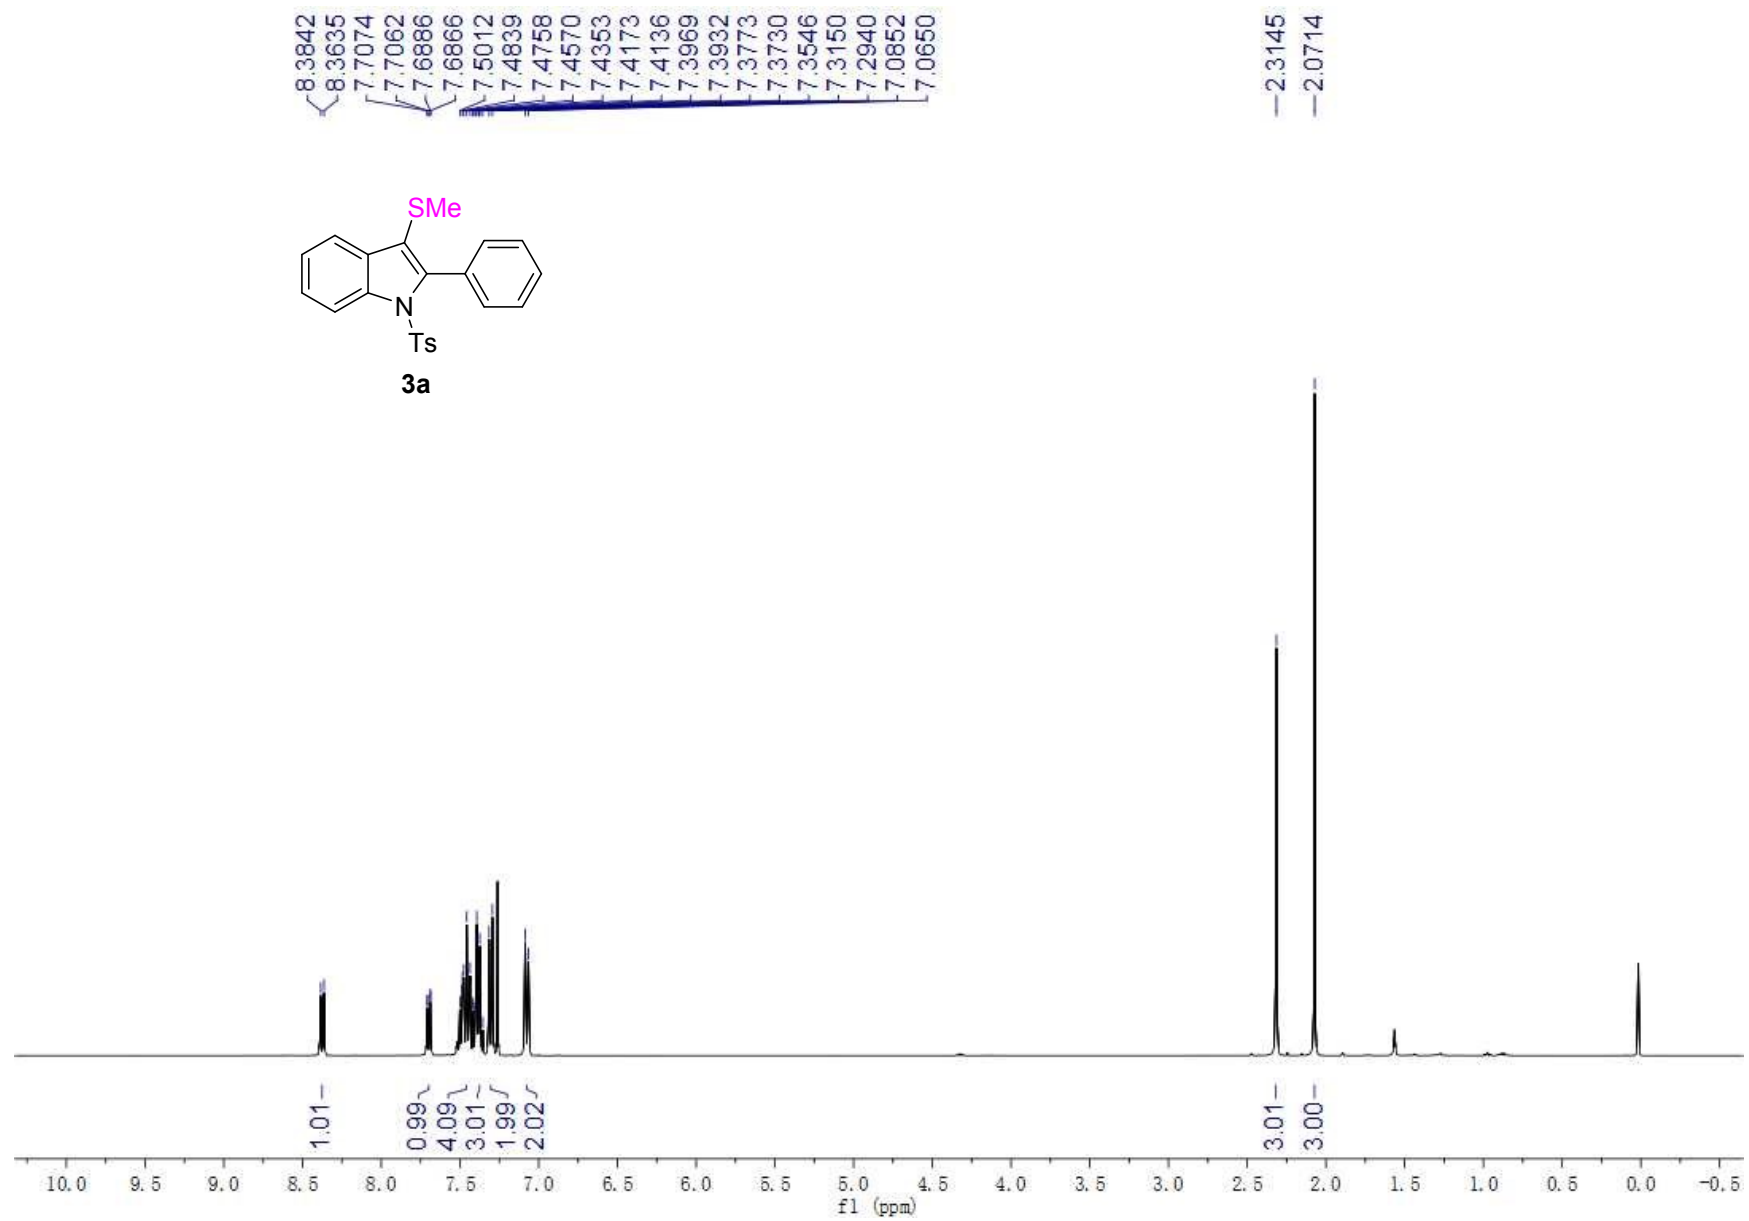

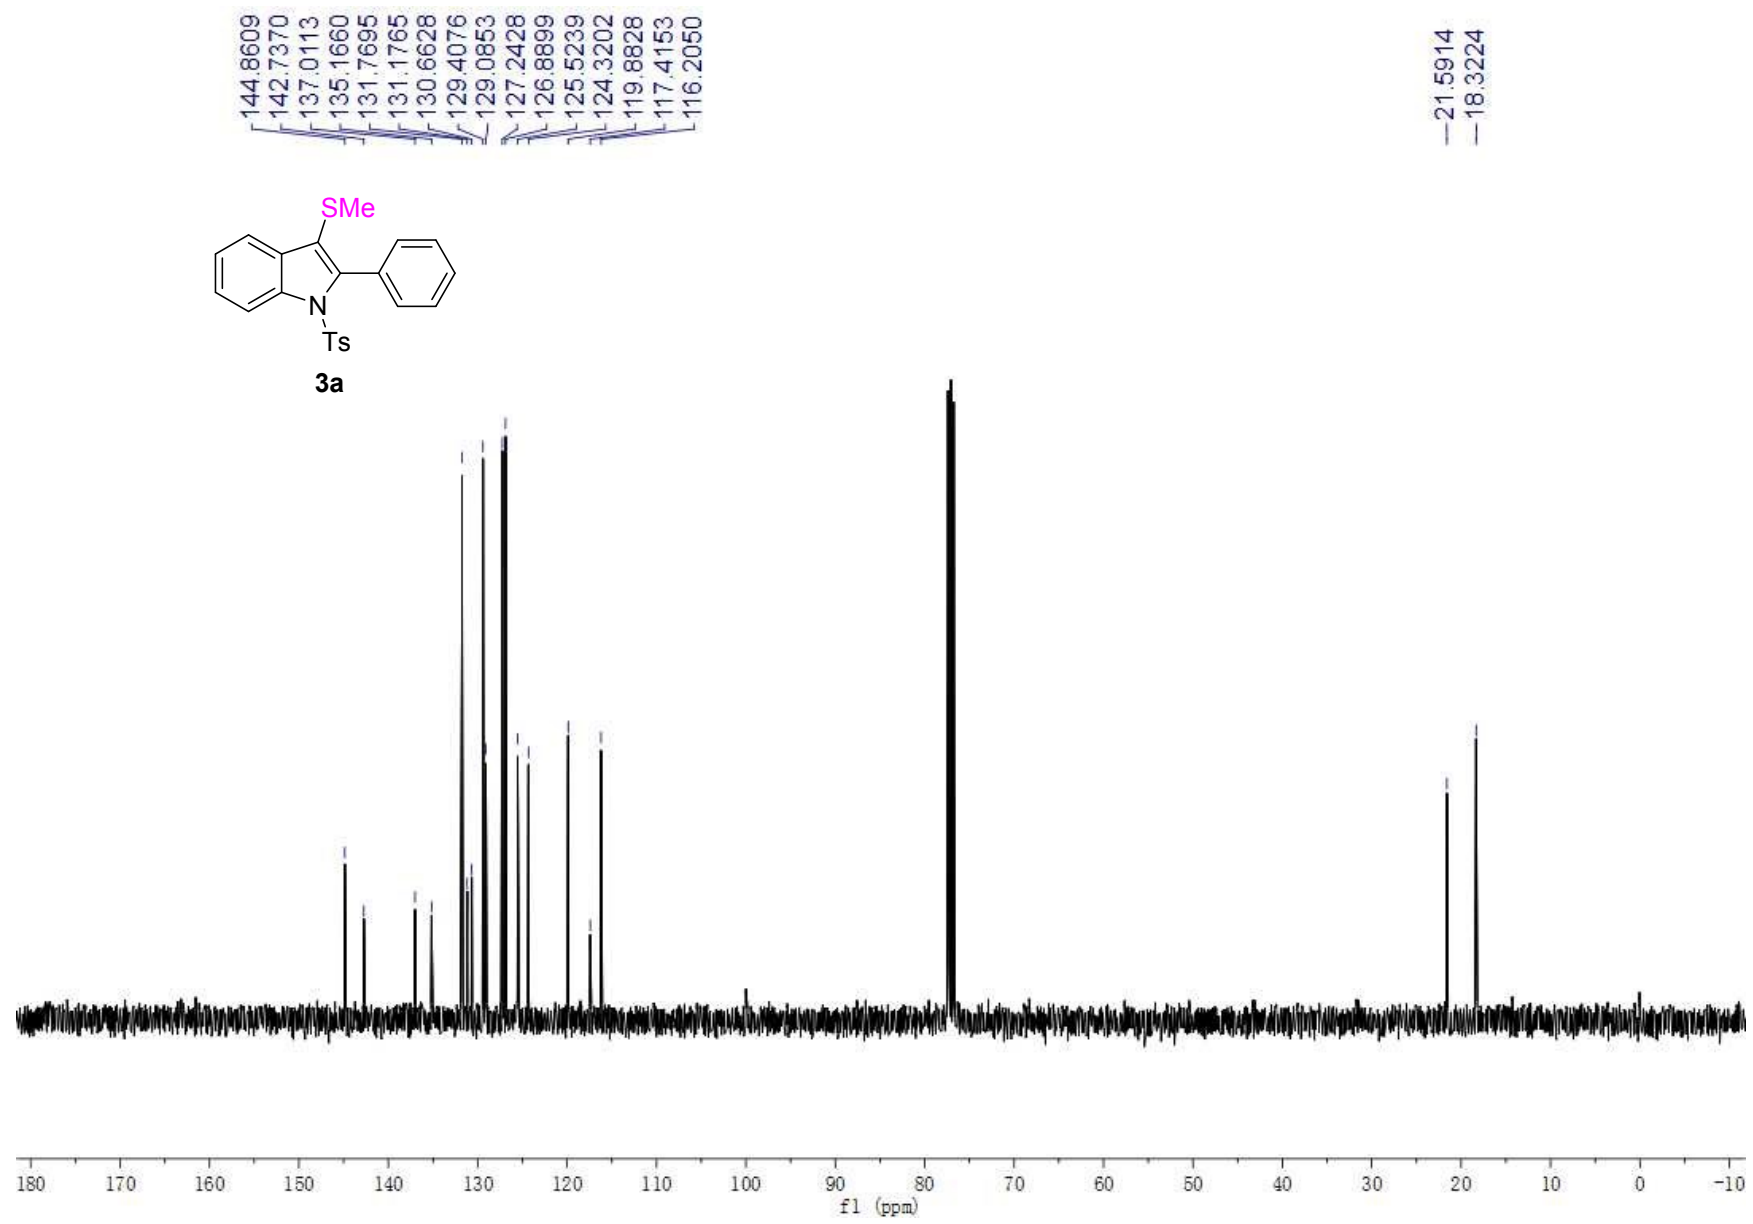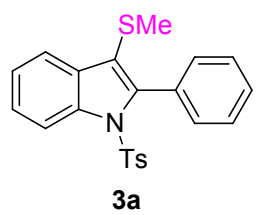

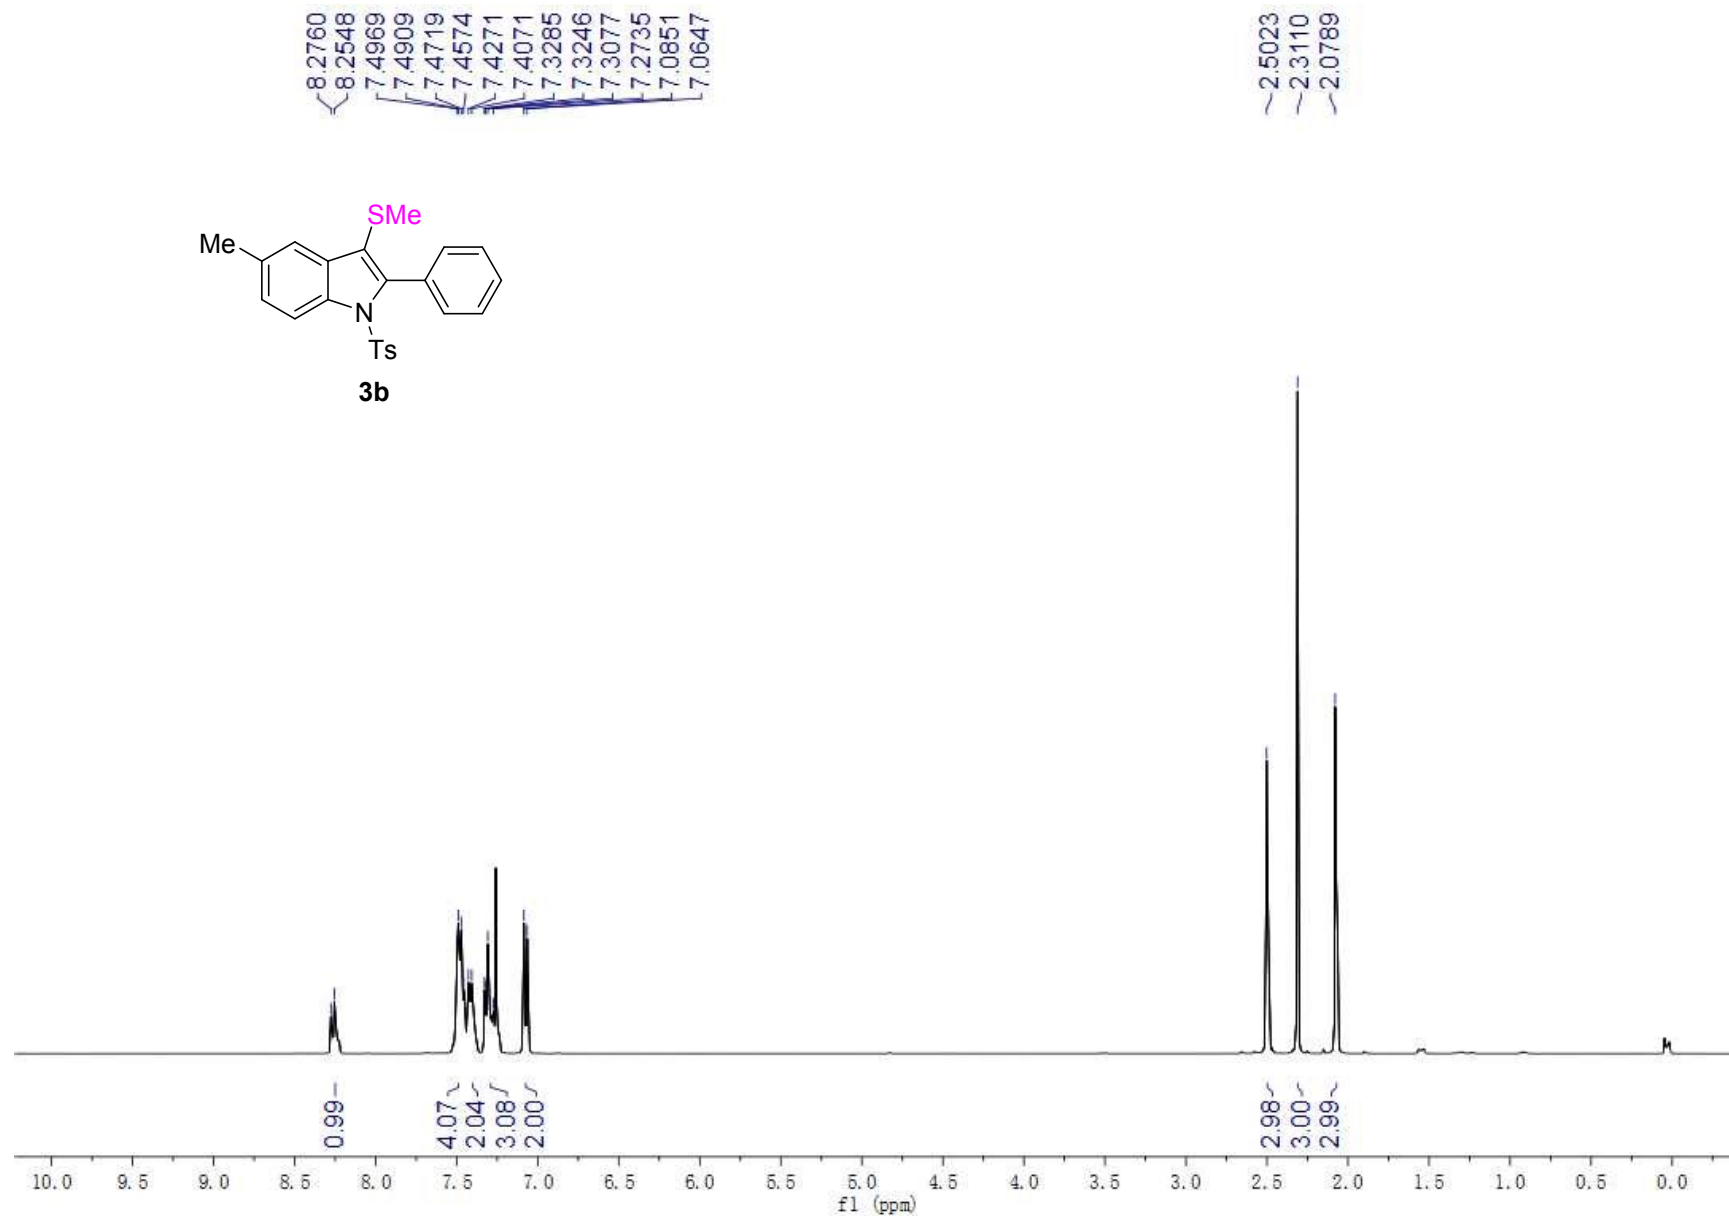



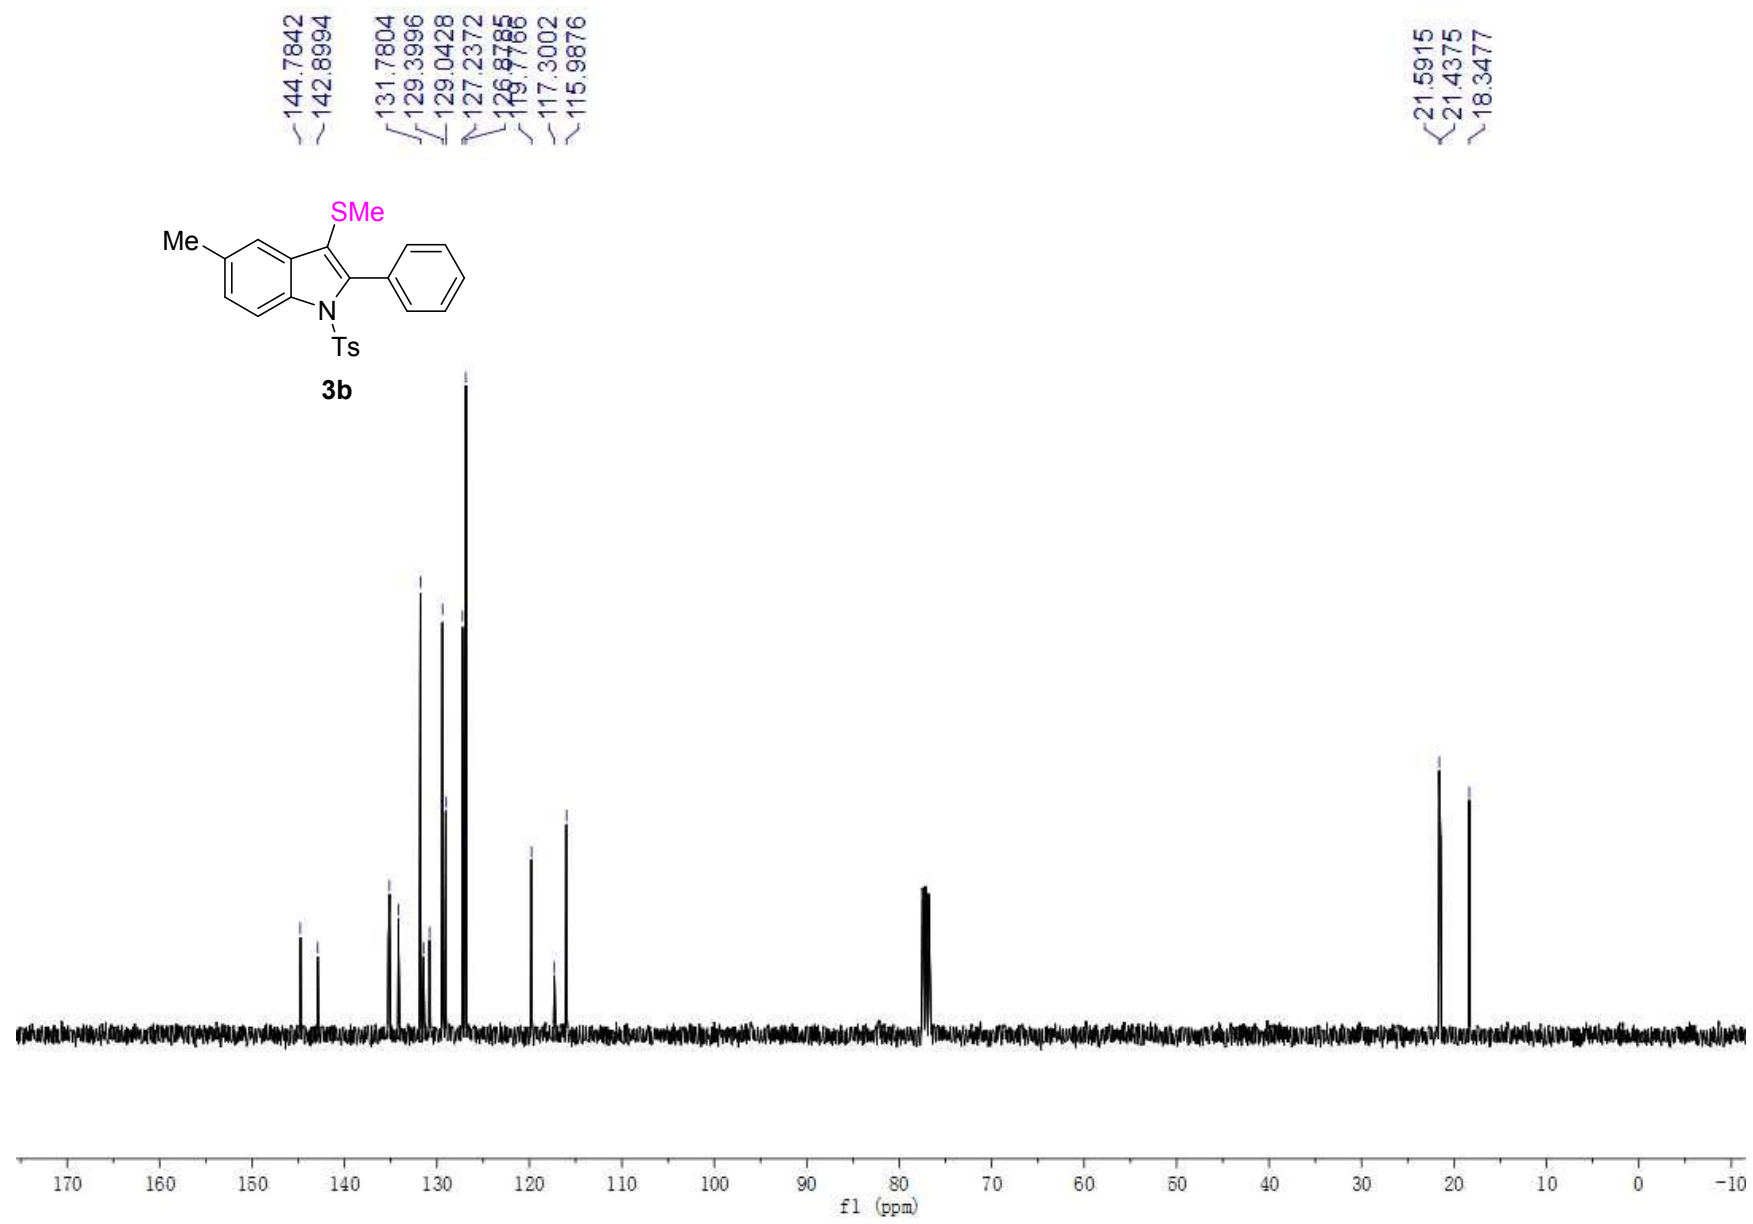

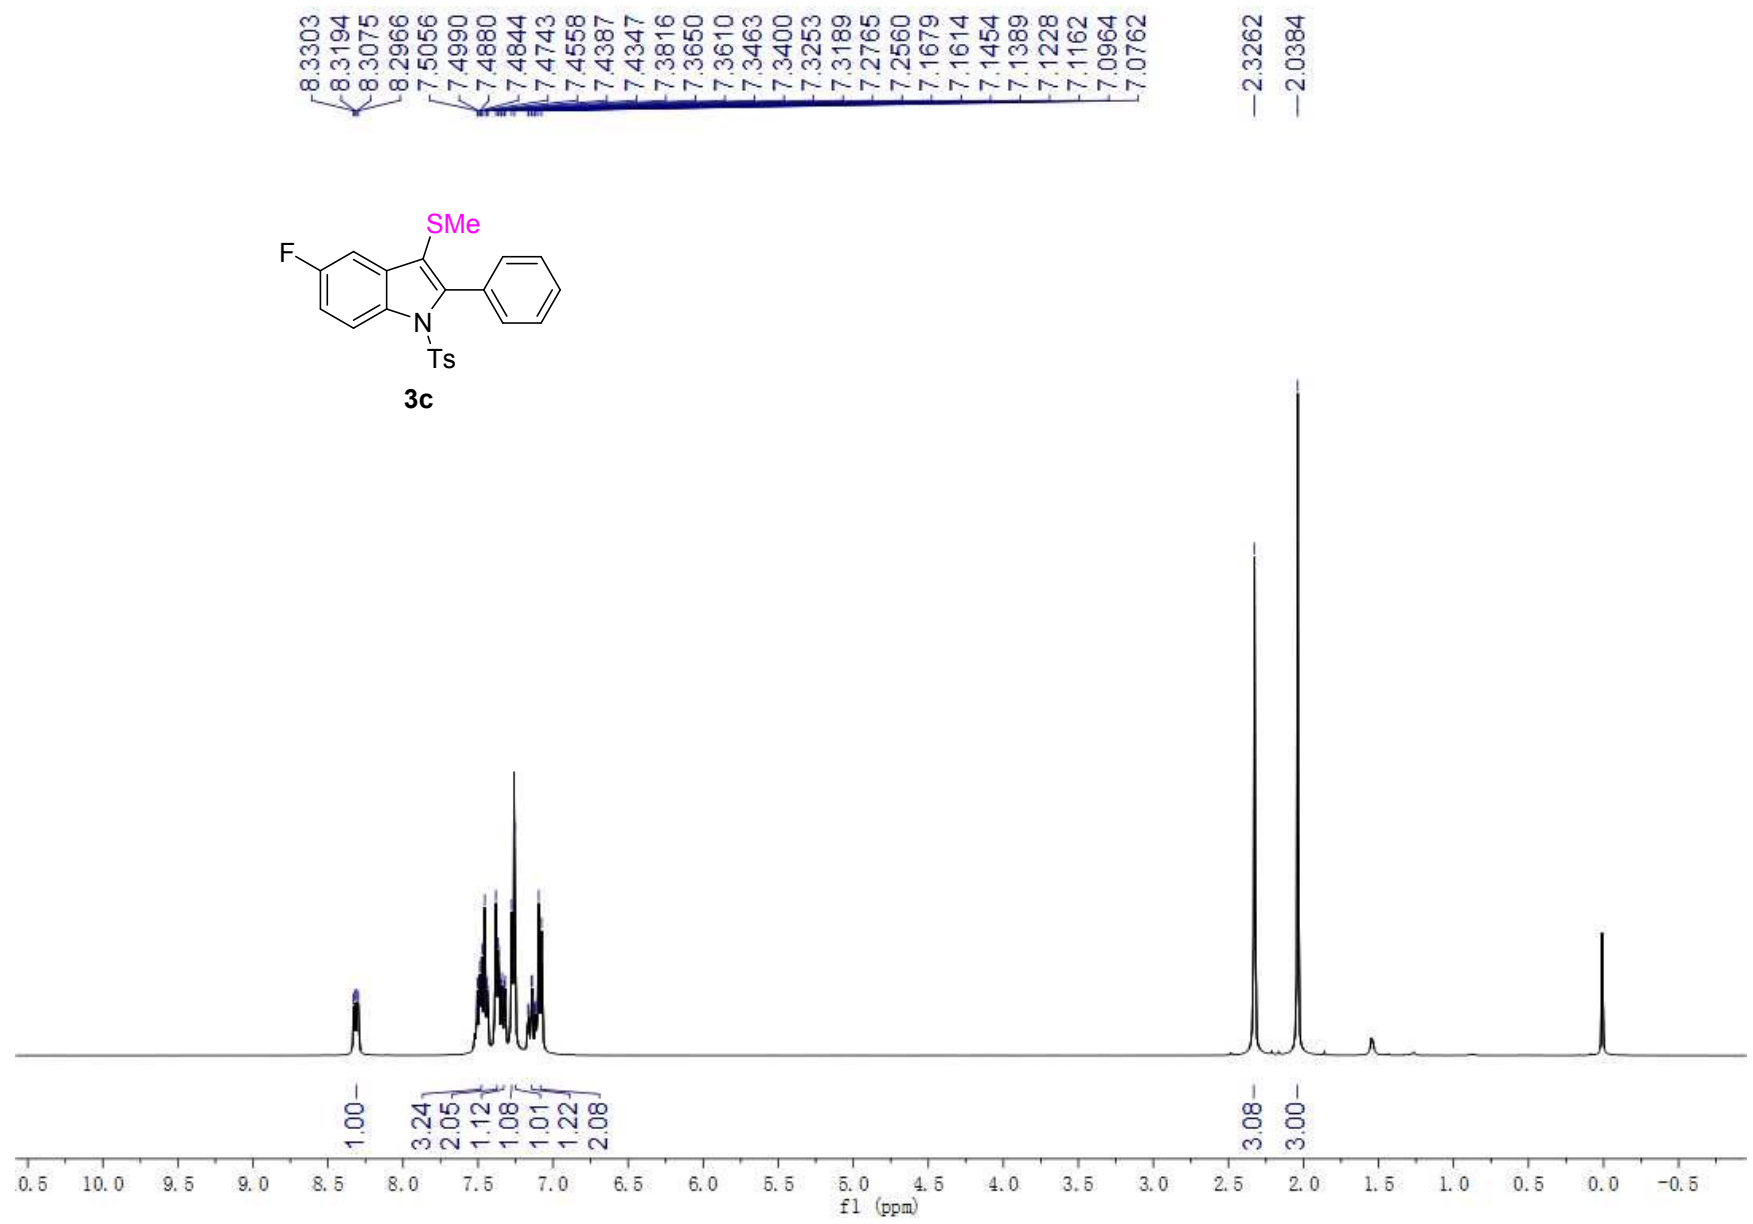

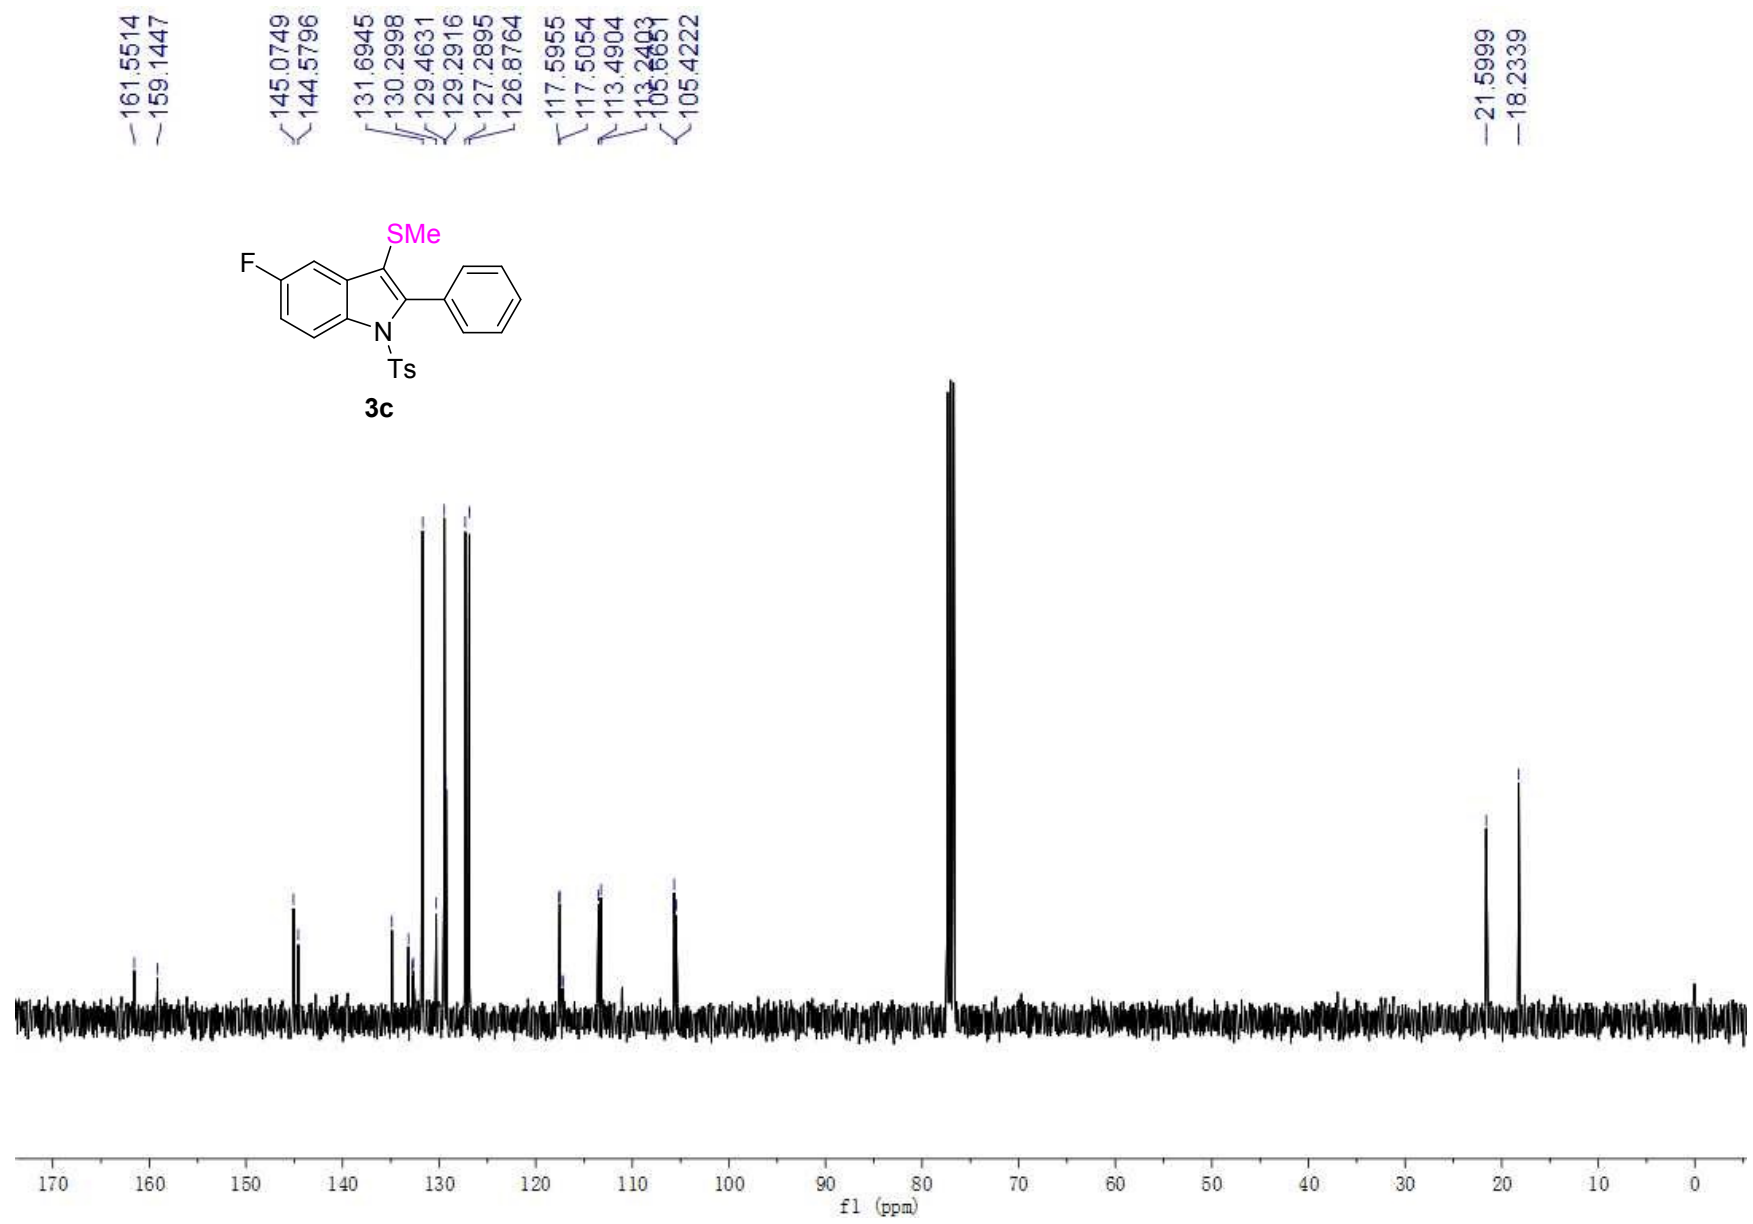

8.5607  
8.5573  
7.5546  
7.5338  
7.5085  
7.4894  
7.4851  
7.4722  
7.4684  
7.4499  
7.4312  
7.4137  
7.3323  
7.3151  
7.2811  
7.2519  
7.1052  
7.0848

2.3274  
2.0266

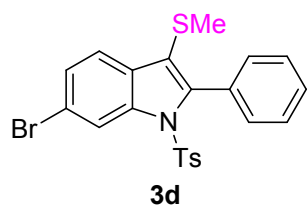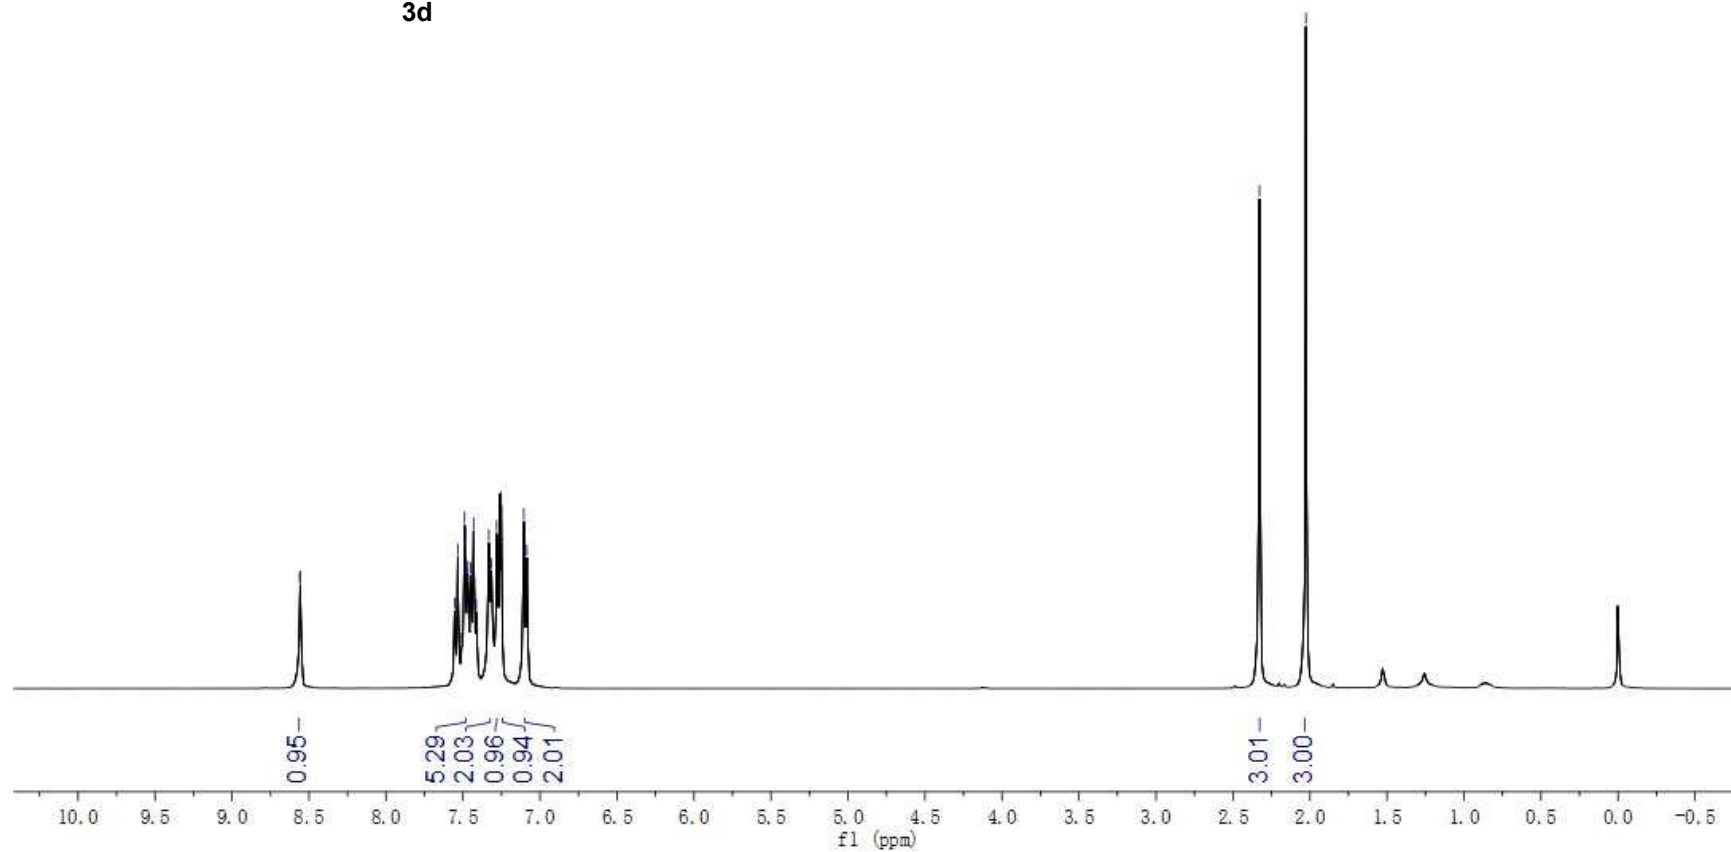

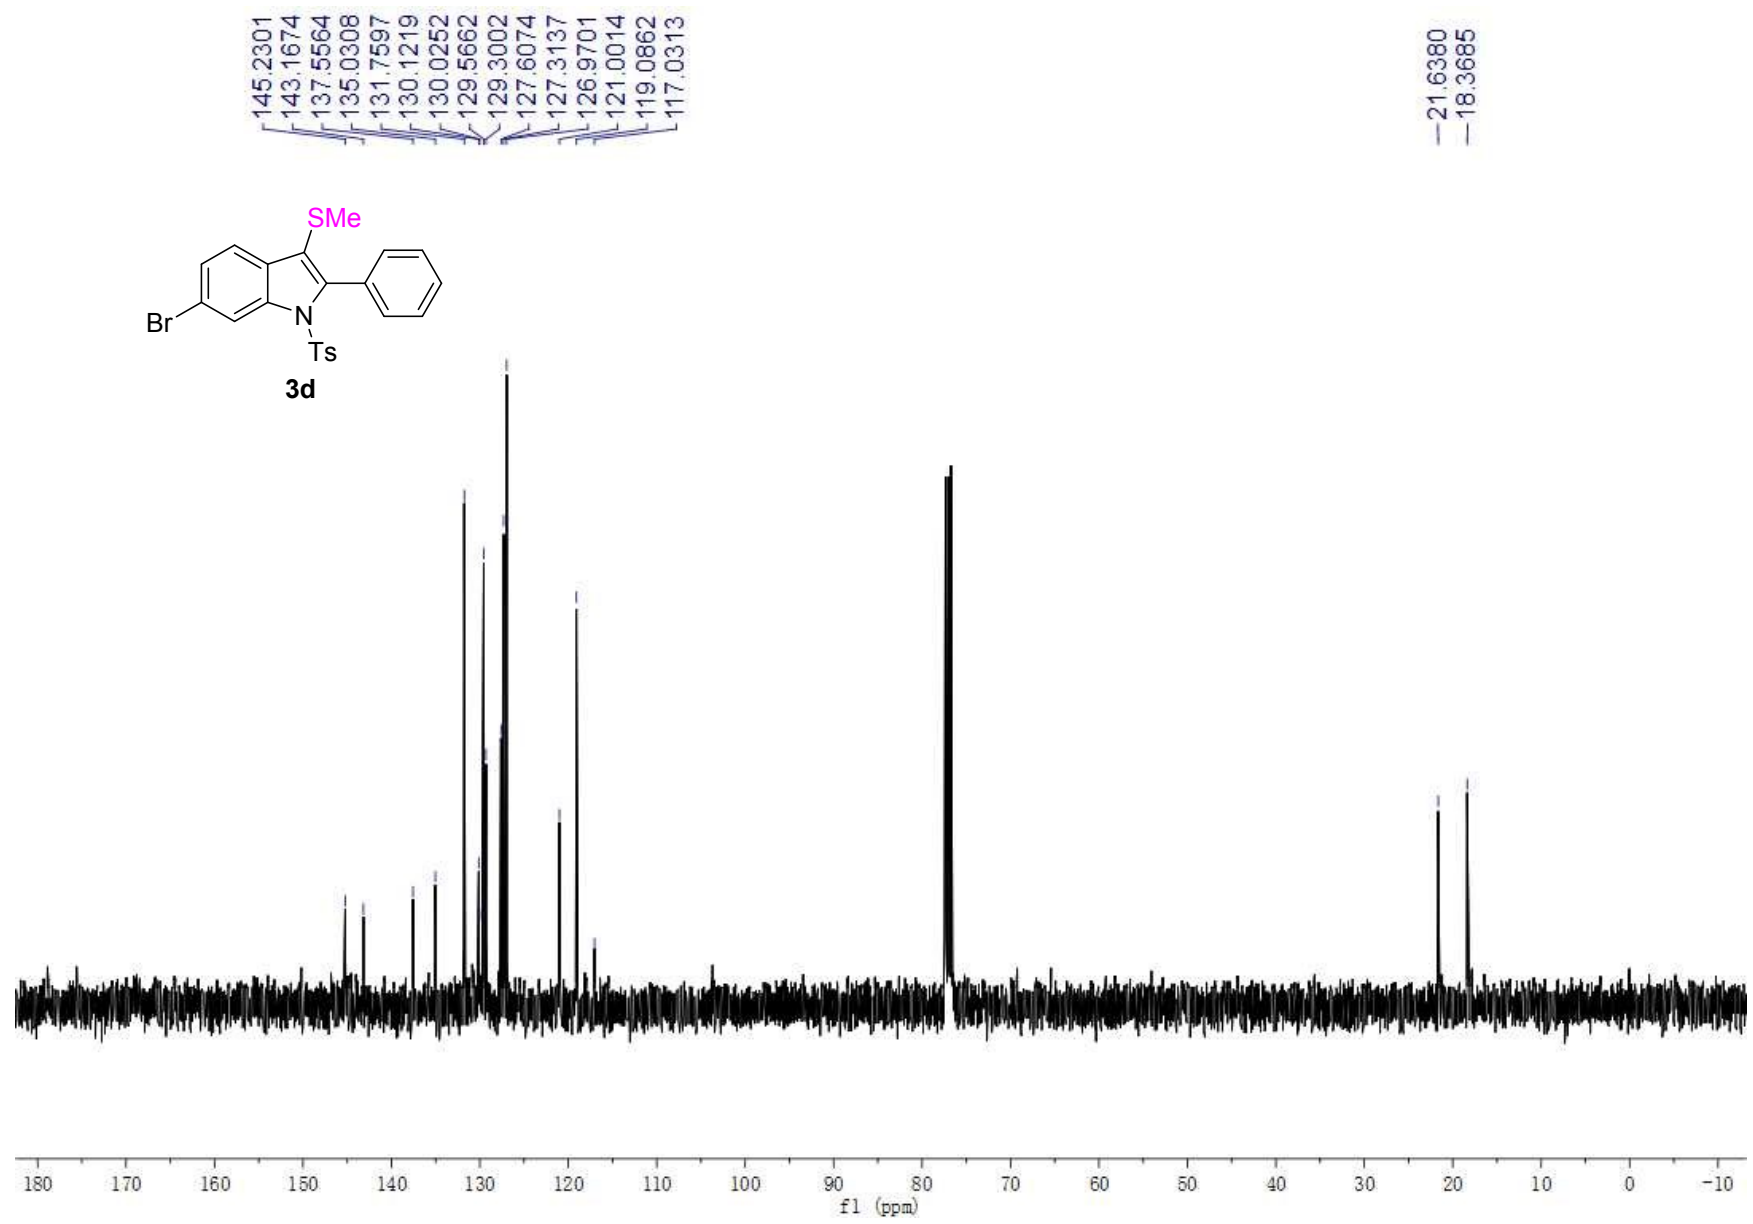

7.6969  
7.6955  
7.6780  
7.6760  
7.4573  
7.4538  
7.4391  
7.4359  
7.4331  
7.4185  
7.4148  
7.3920  
7.3893  
7.3728  
7.3704  
7.3671  
7.3617  
7.3537  
7.3452  
7.3372  
7.3318  
7.3246  
7.2865  
7.2655  
7.1699  
7.1629  
7.1576  
7.1460  
7.1411  
7.1361  
7.1245  
7.1193  
7.1121  
7.0904  
7.0703

-2.3171  
-2.0712

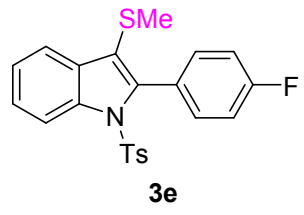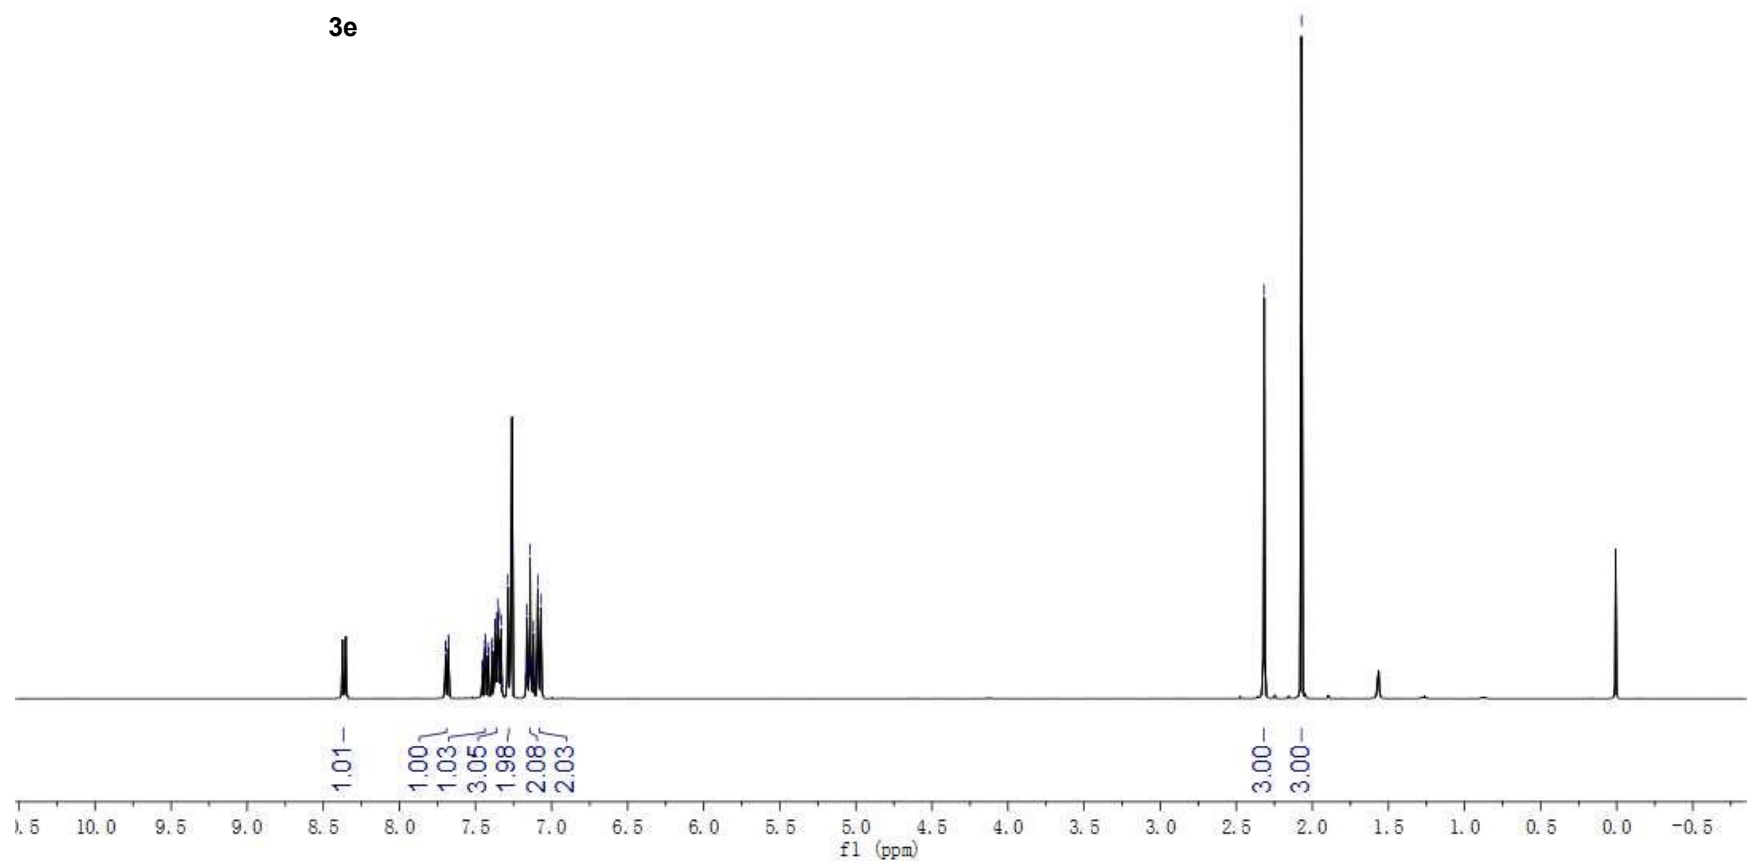

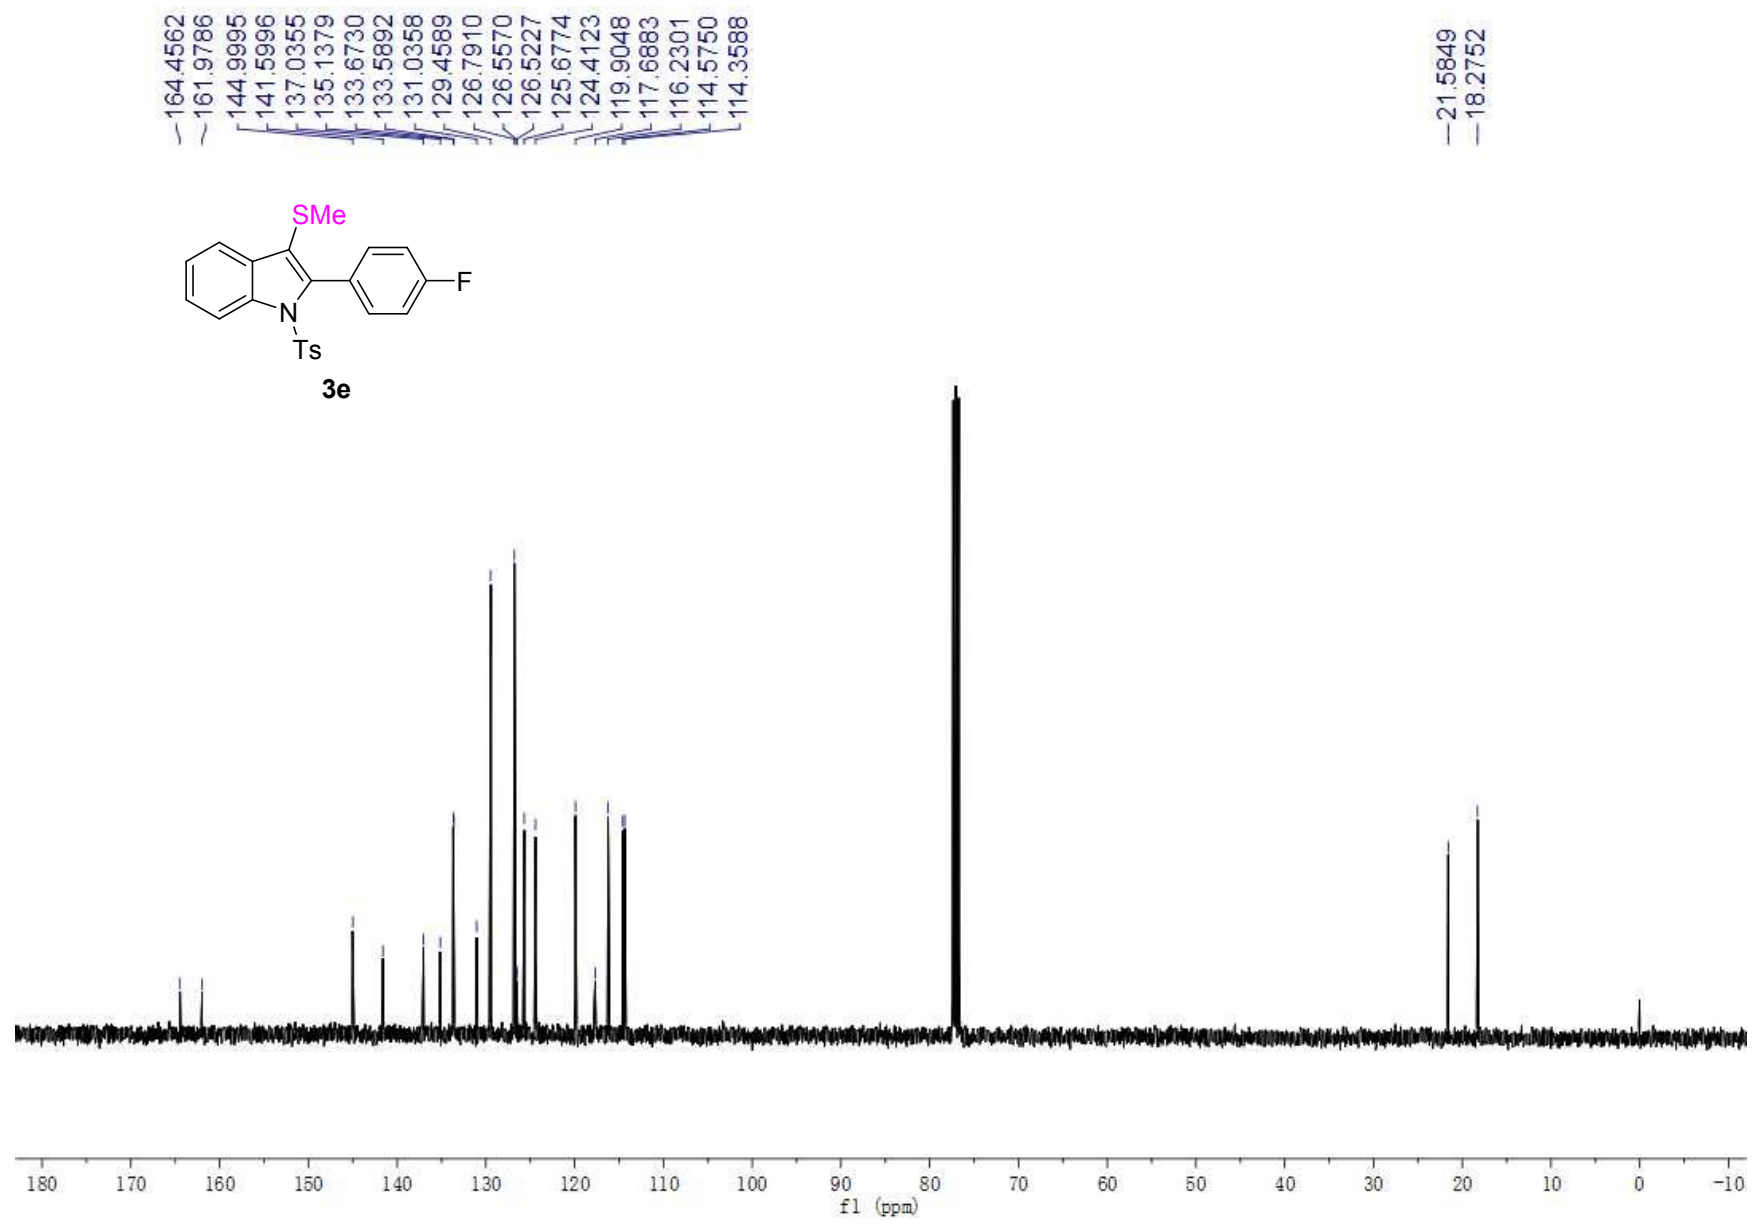

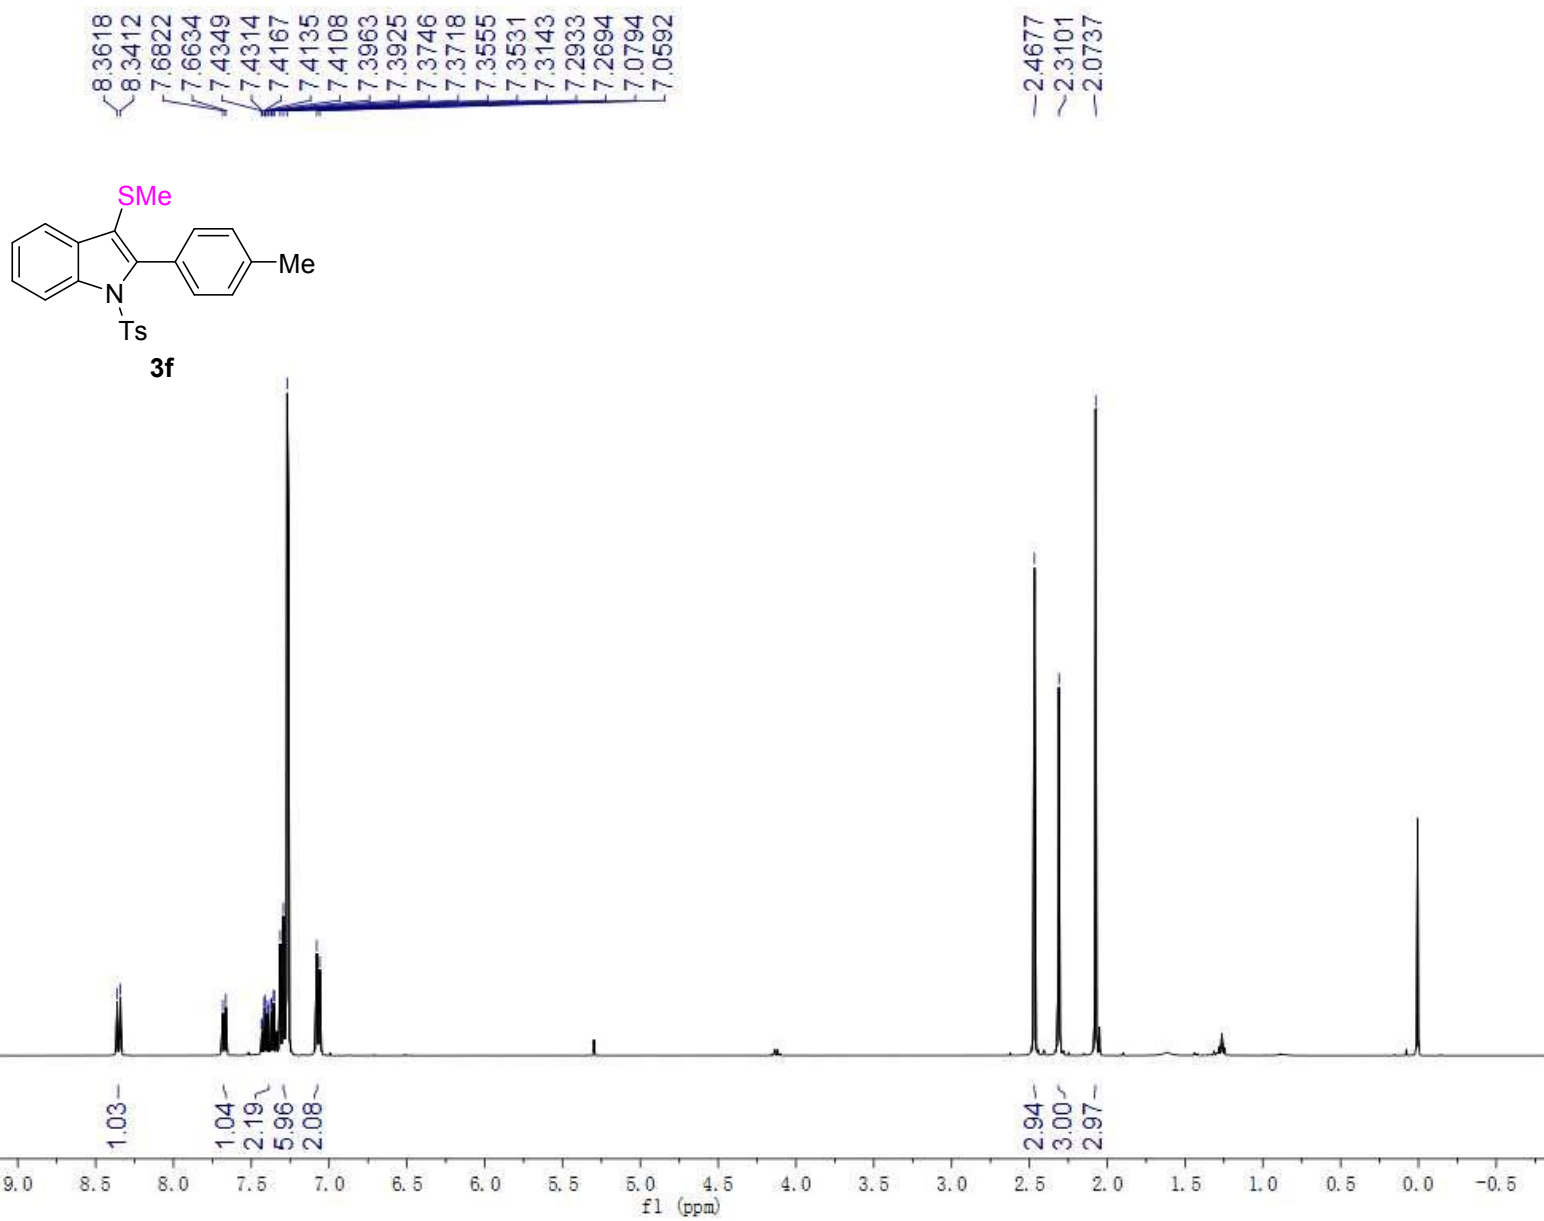



144.7814  
142.9692  
139.0622  
136.9753  
135.1380  
131.5923  
131.2427  
129.3570  
128.0424  
127.6888  
126.8856  
125.3780  
124.2779  
119.7899  
117.1598  
116.2316

21.6446  
21.5807  
18.3426

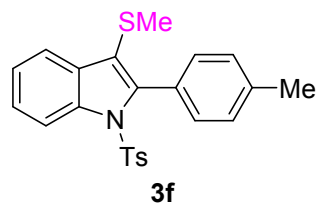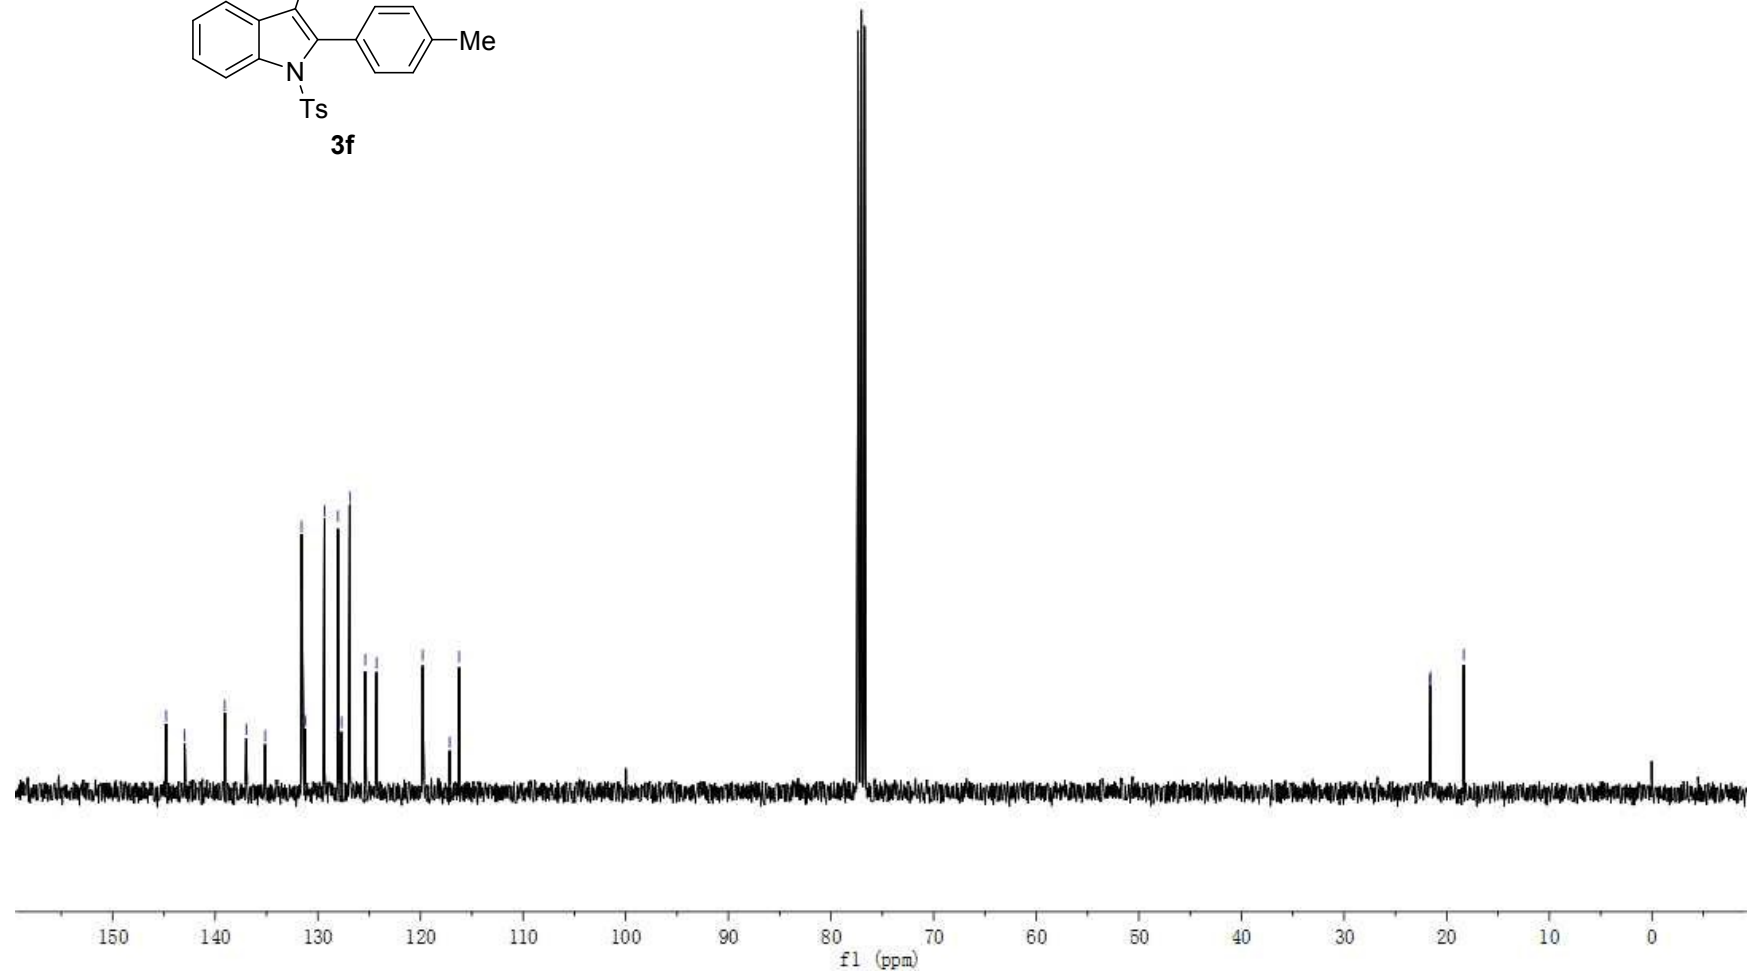

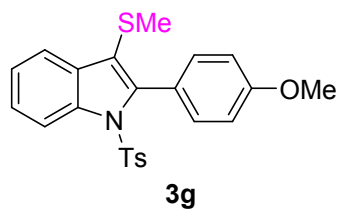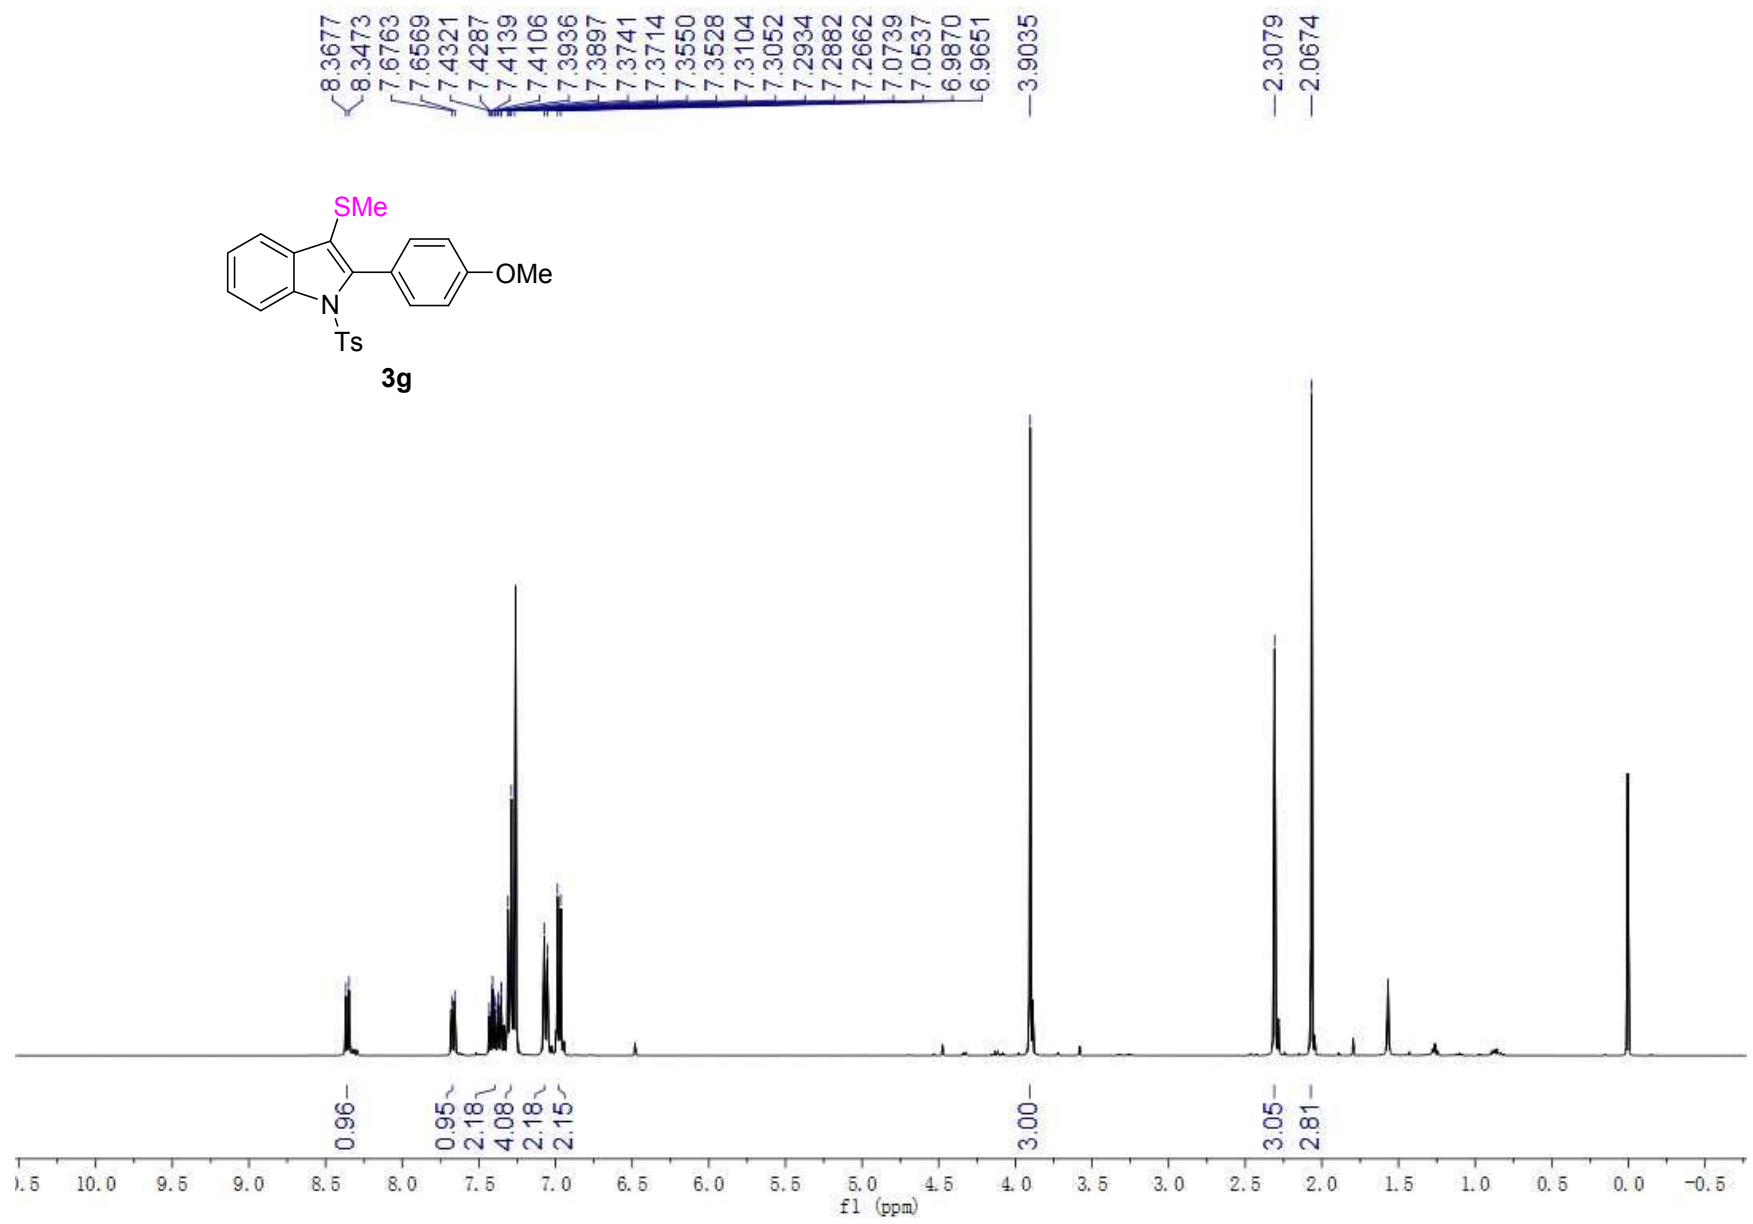

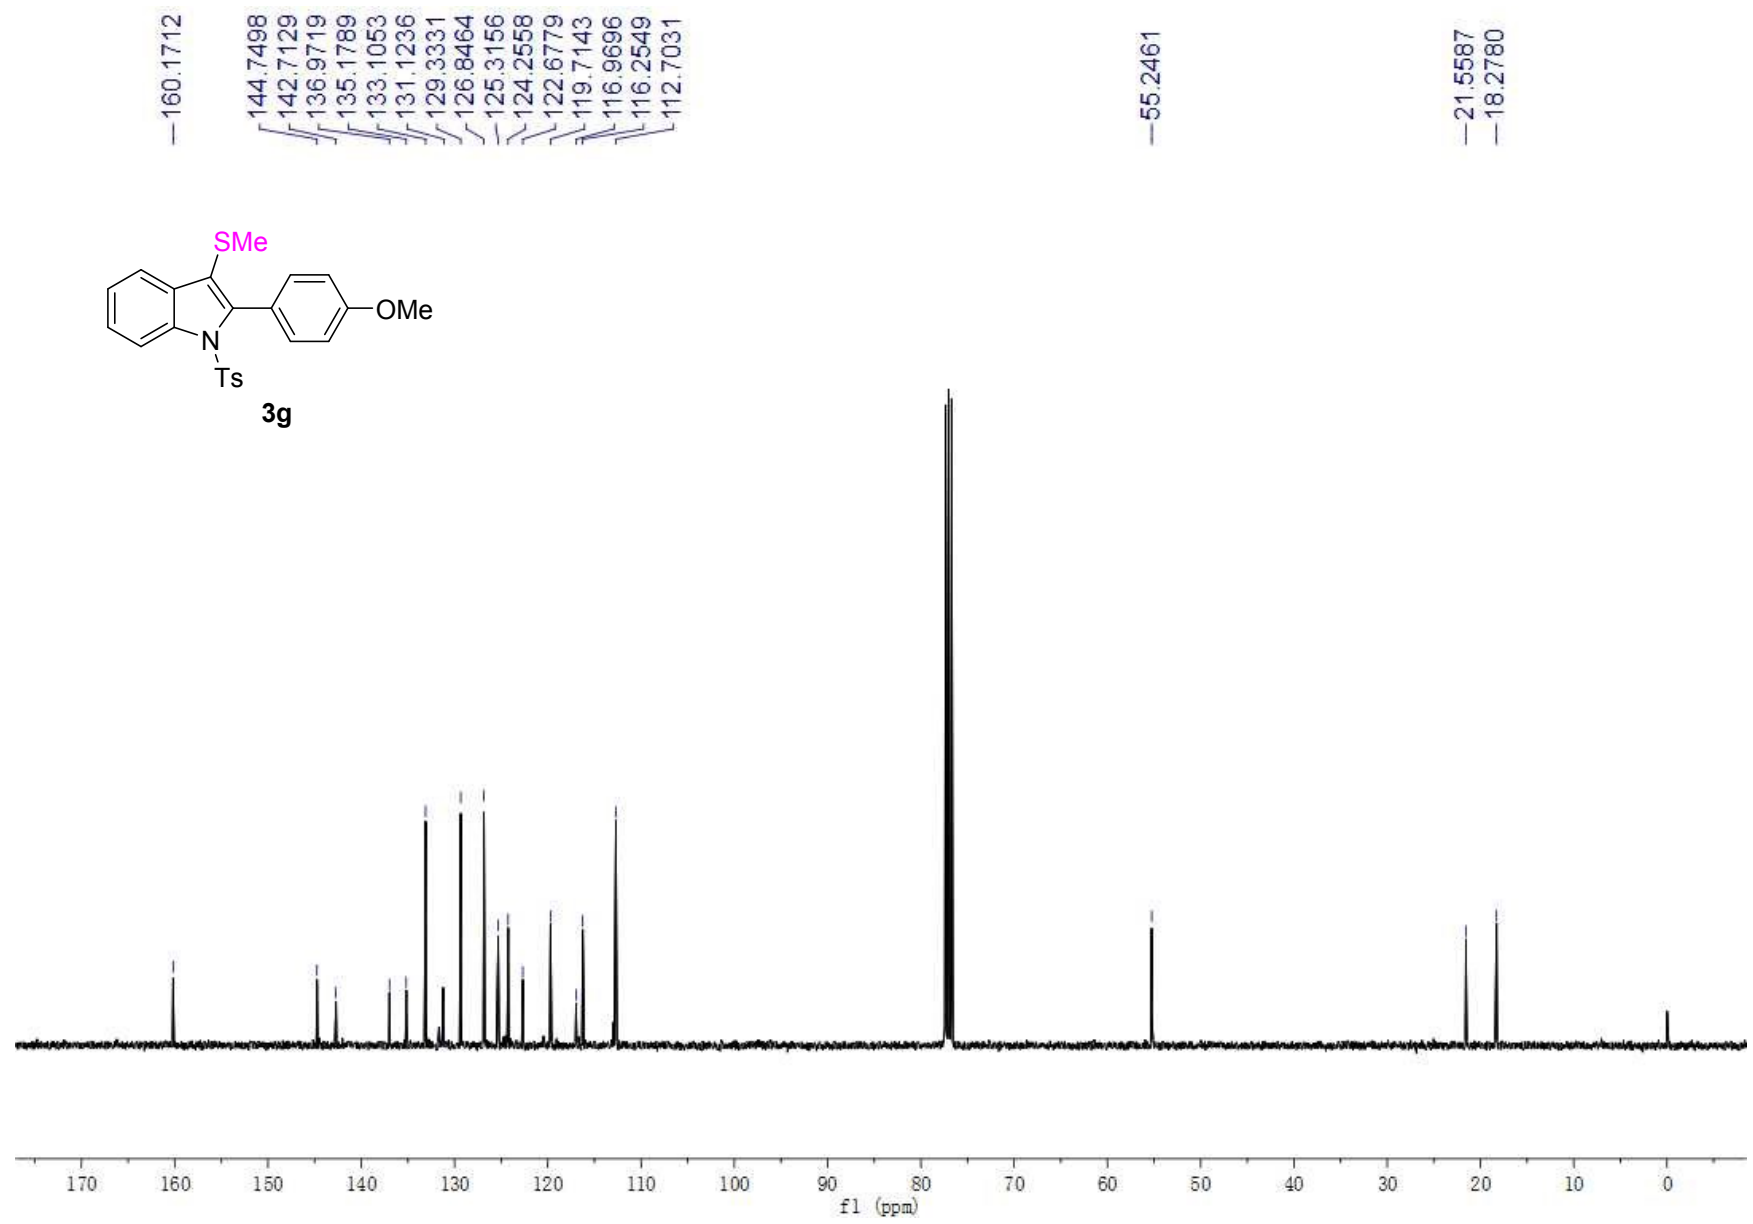

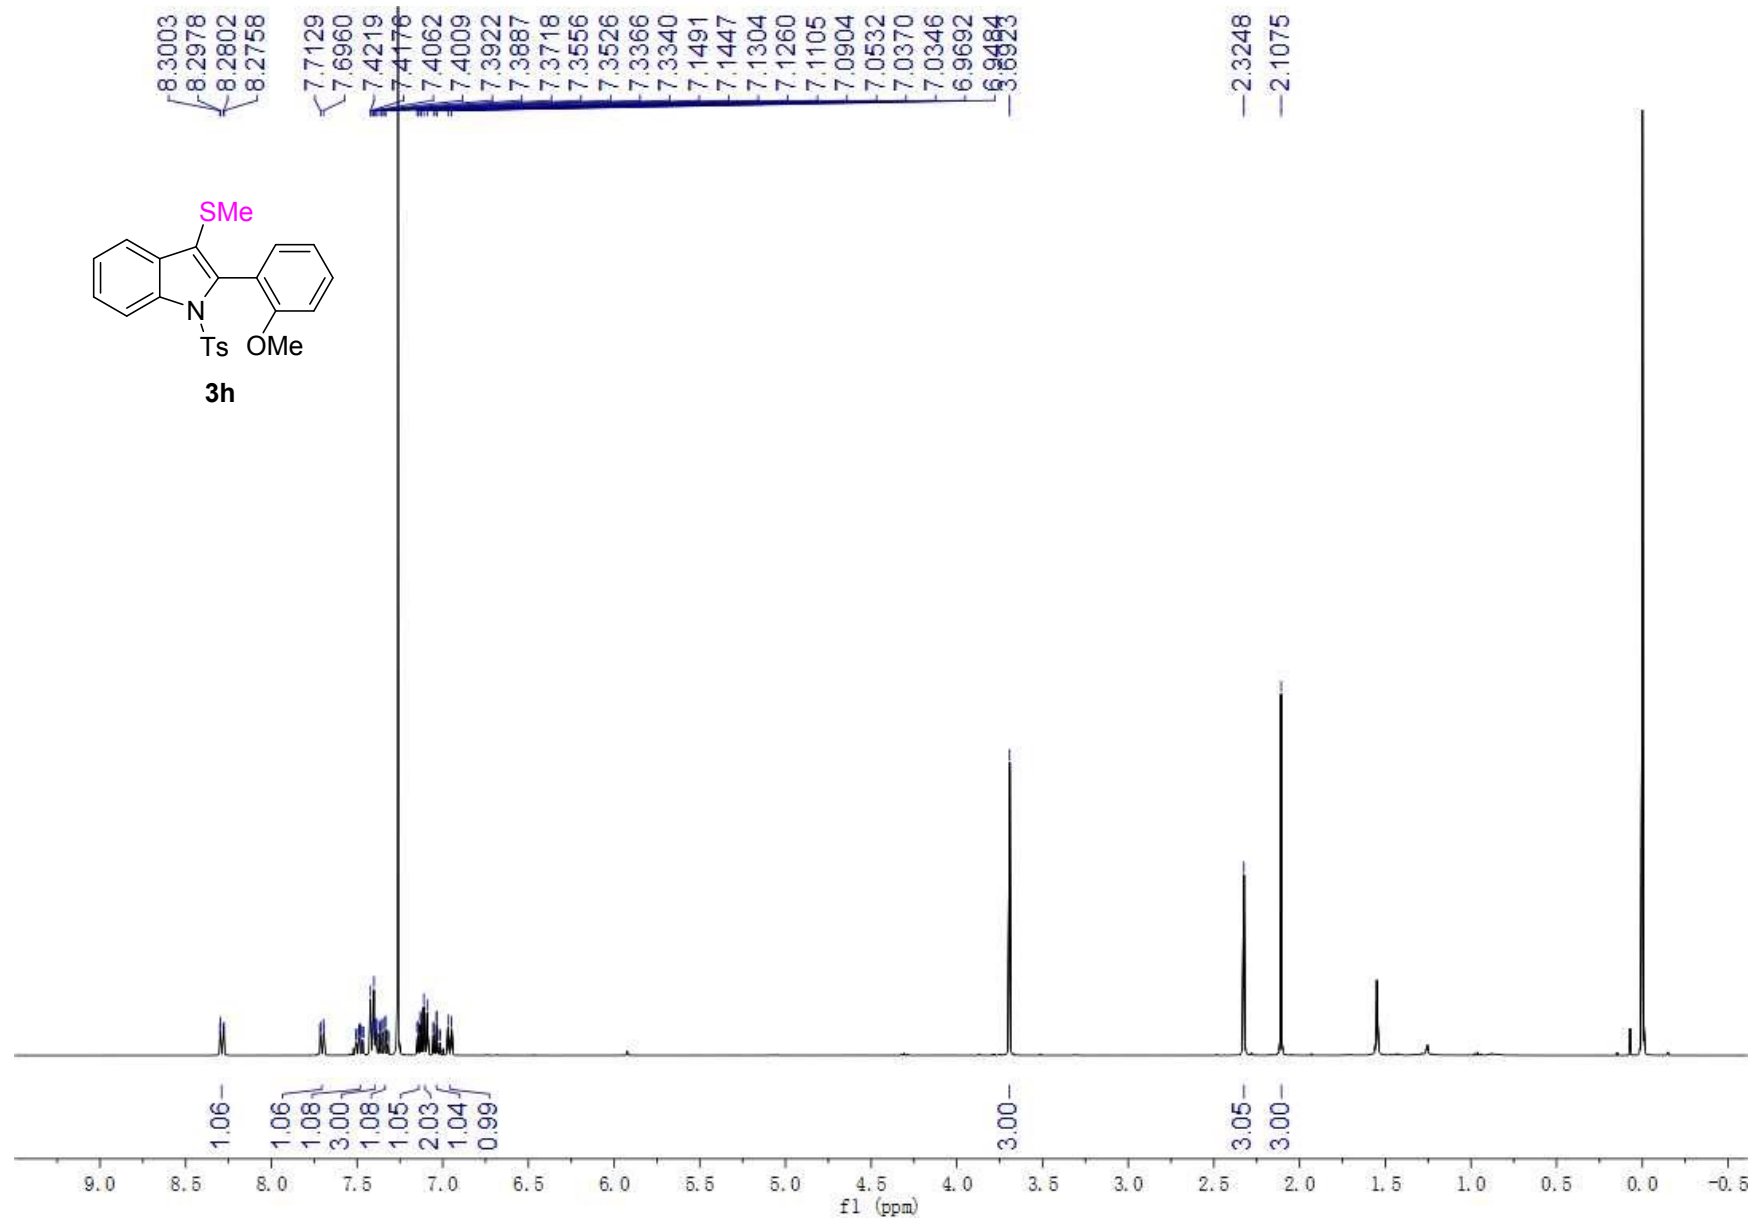

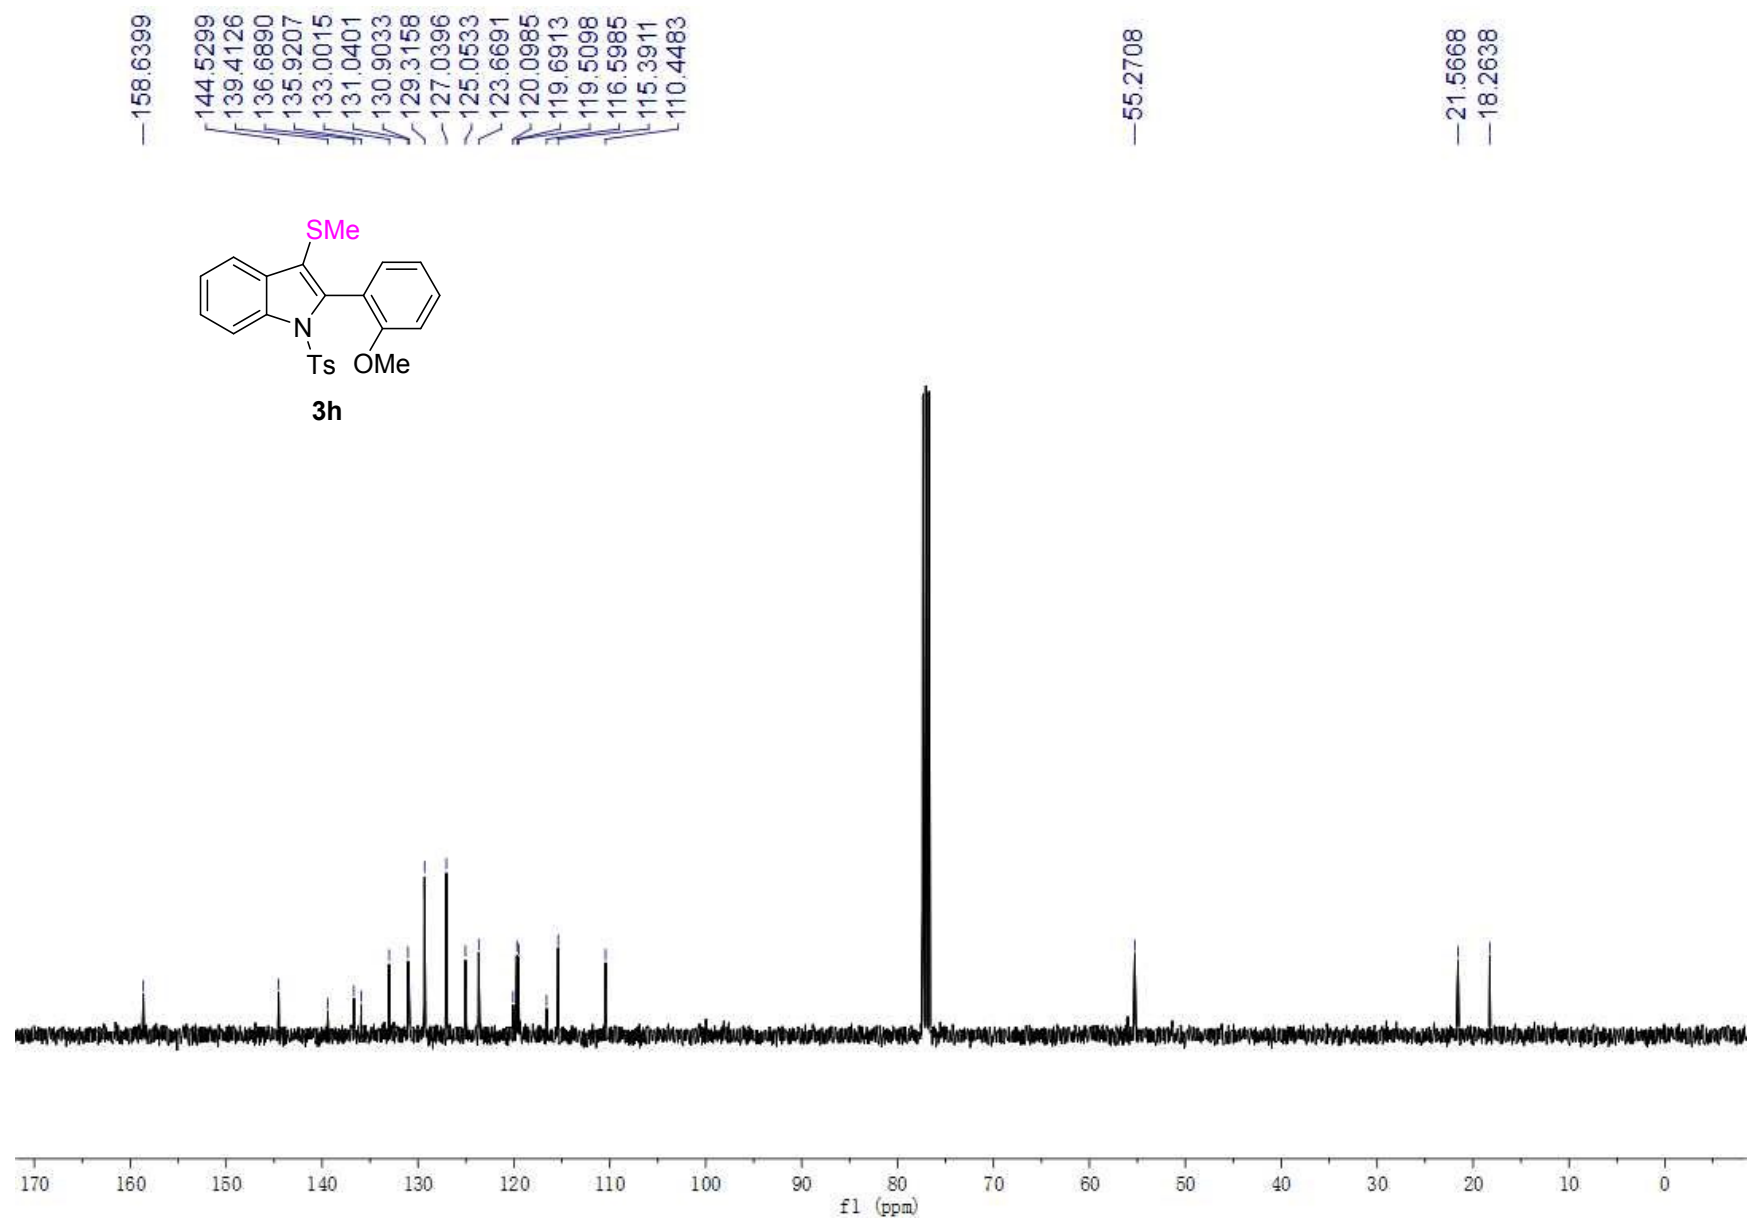

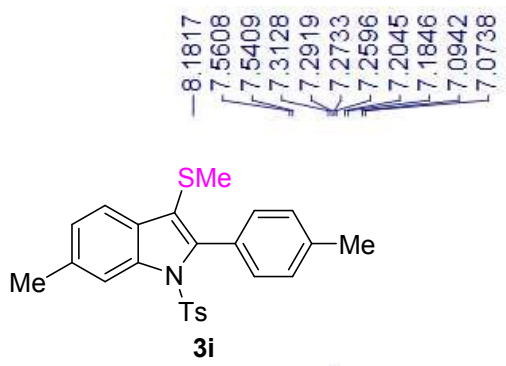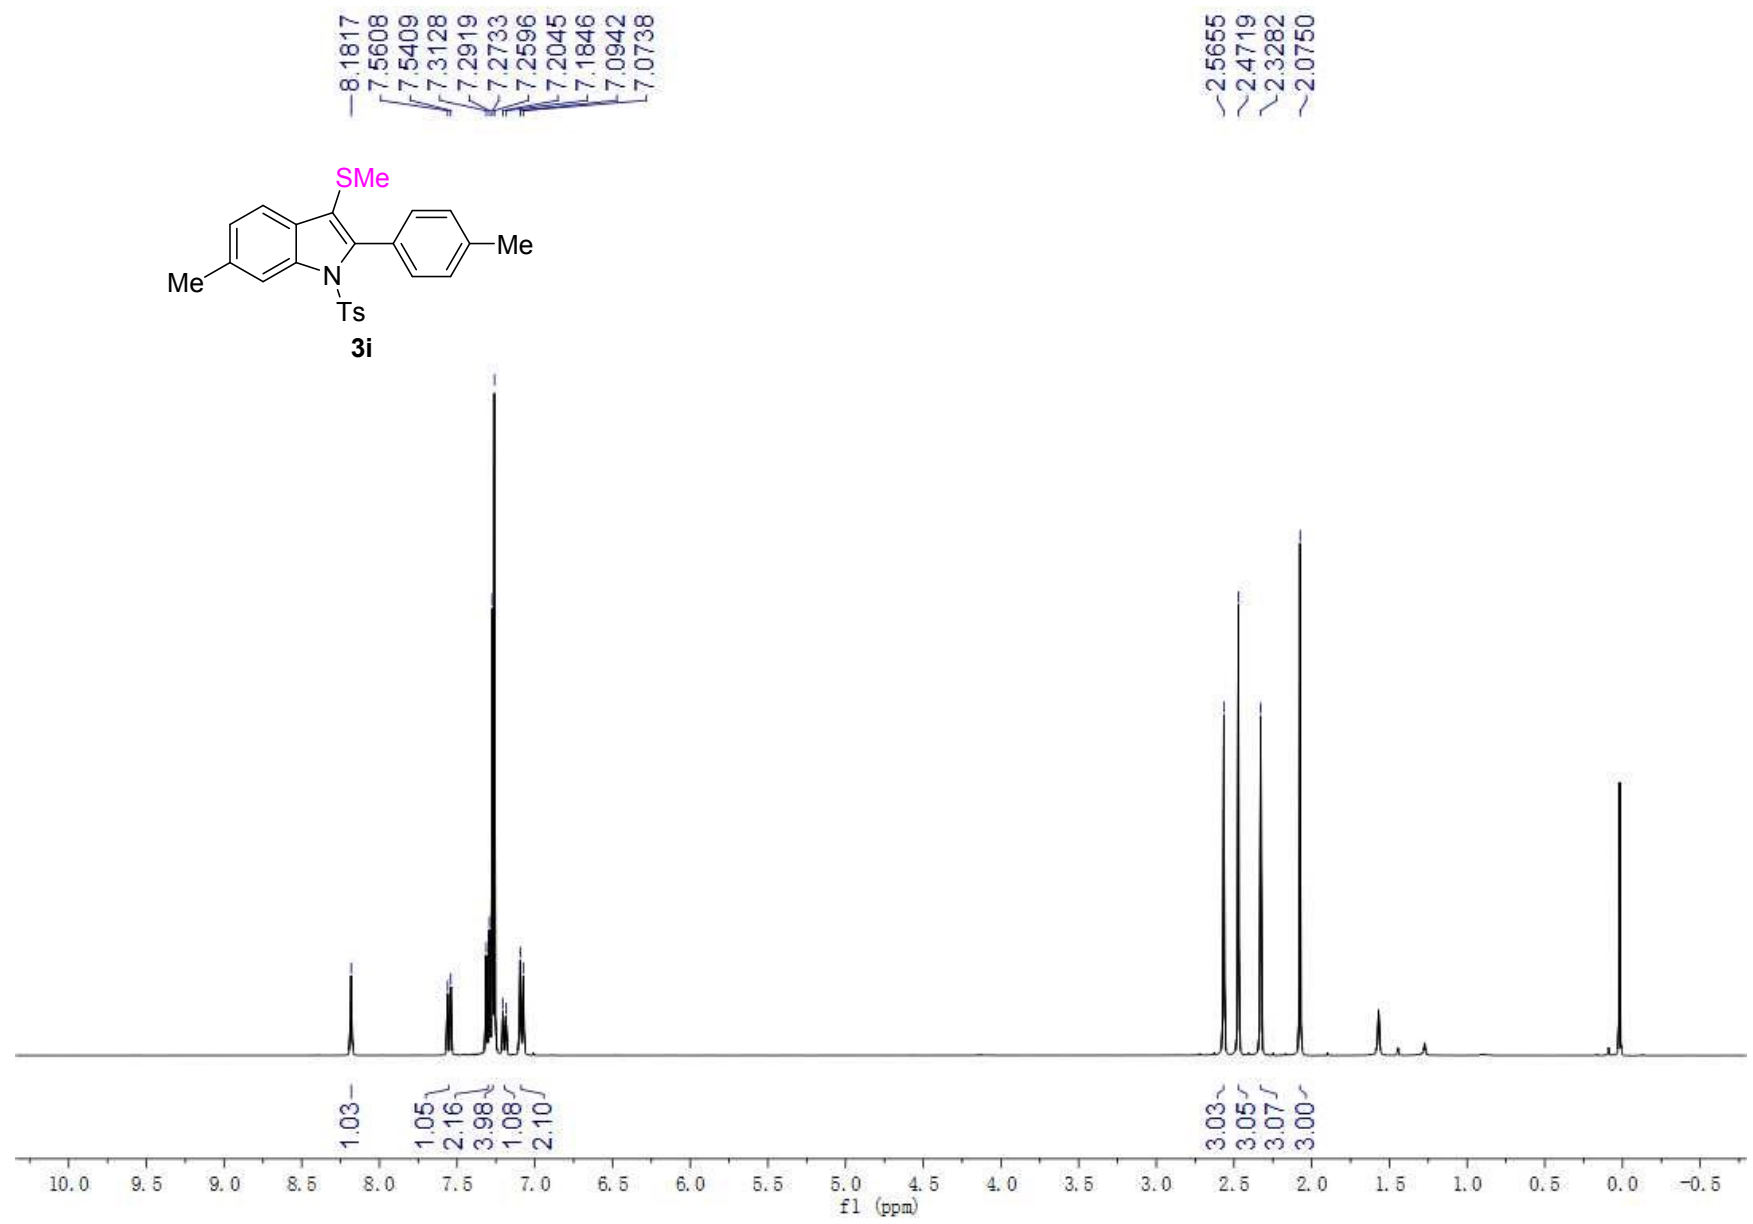

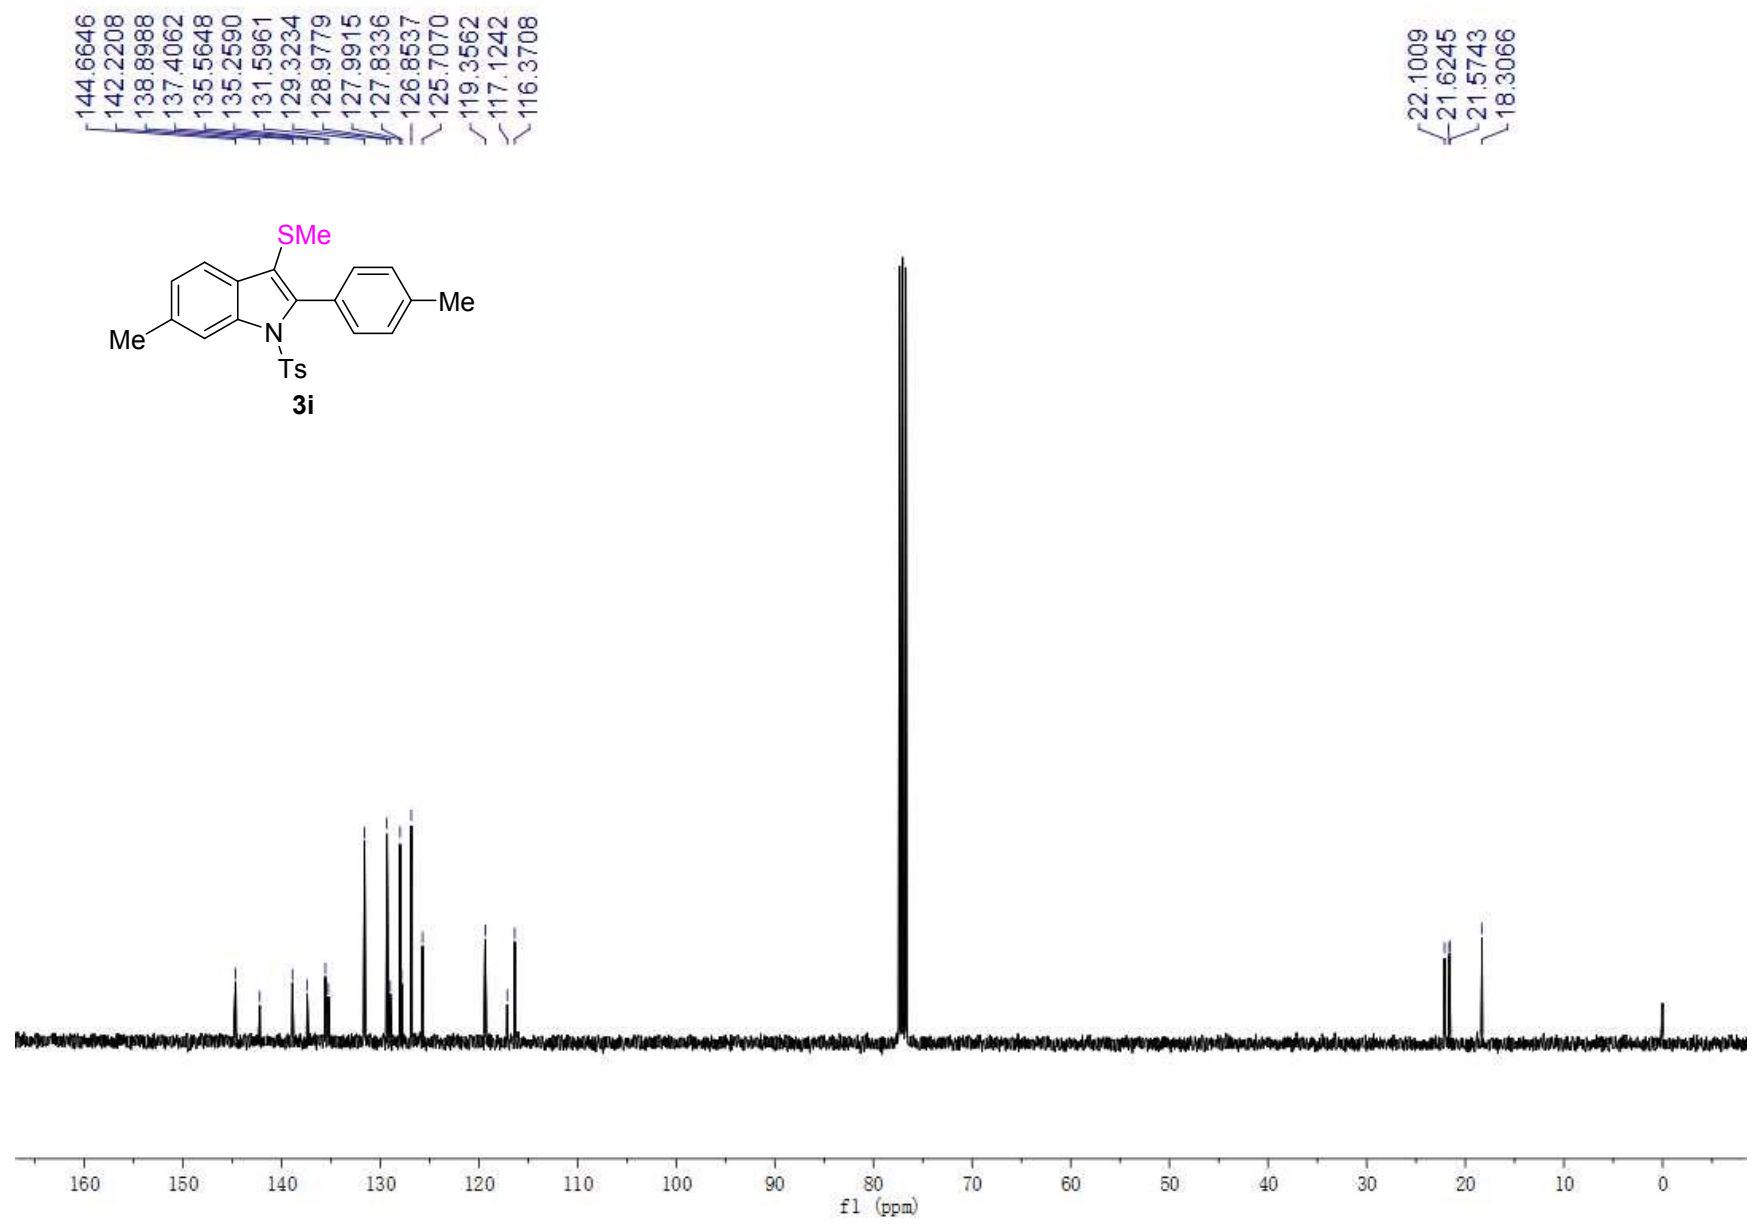

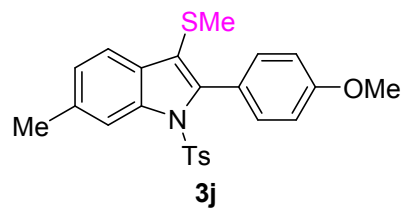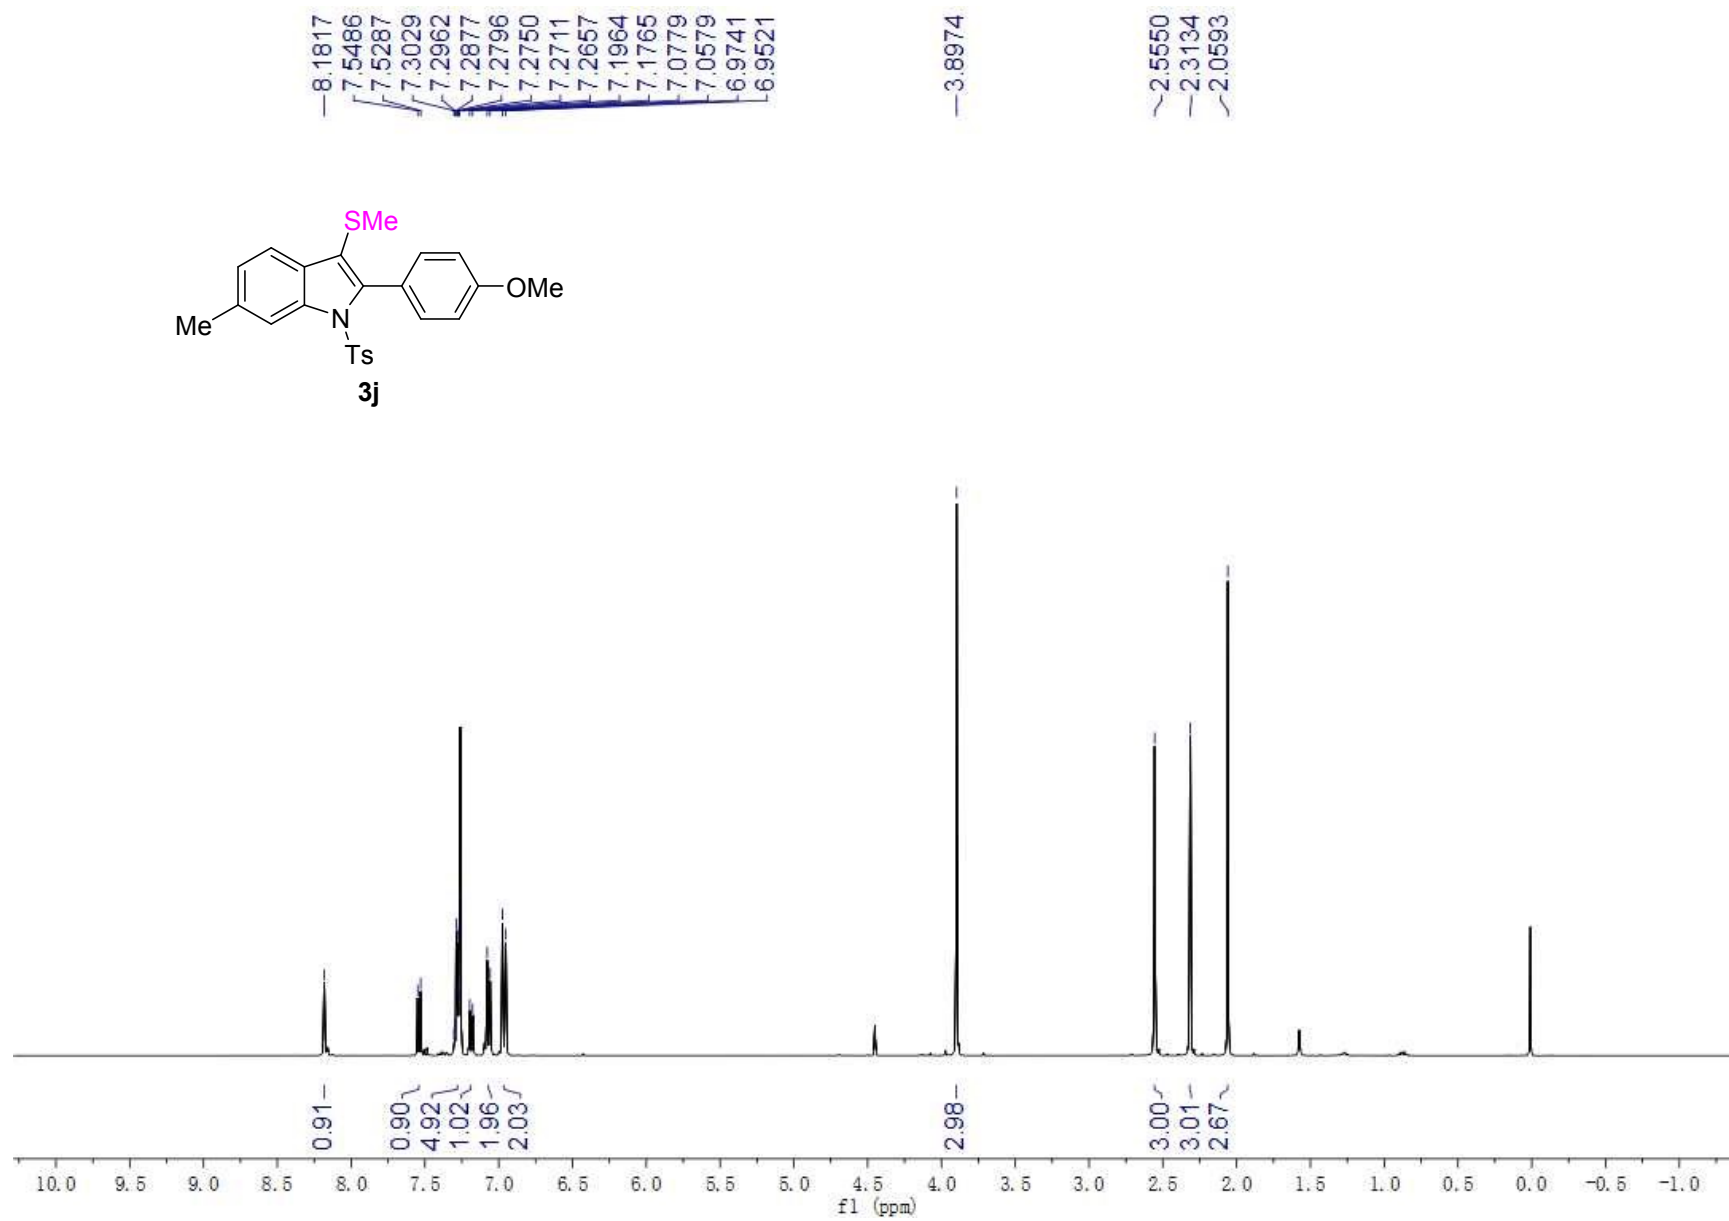



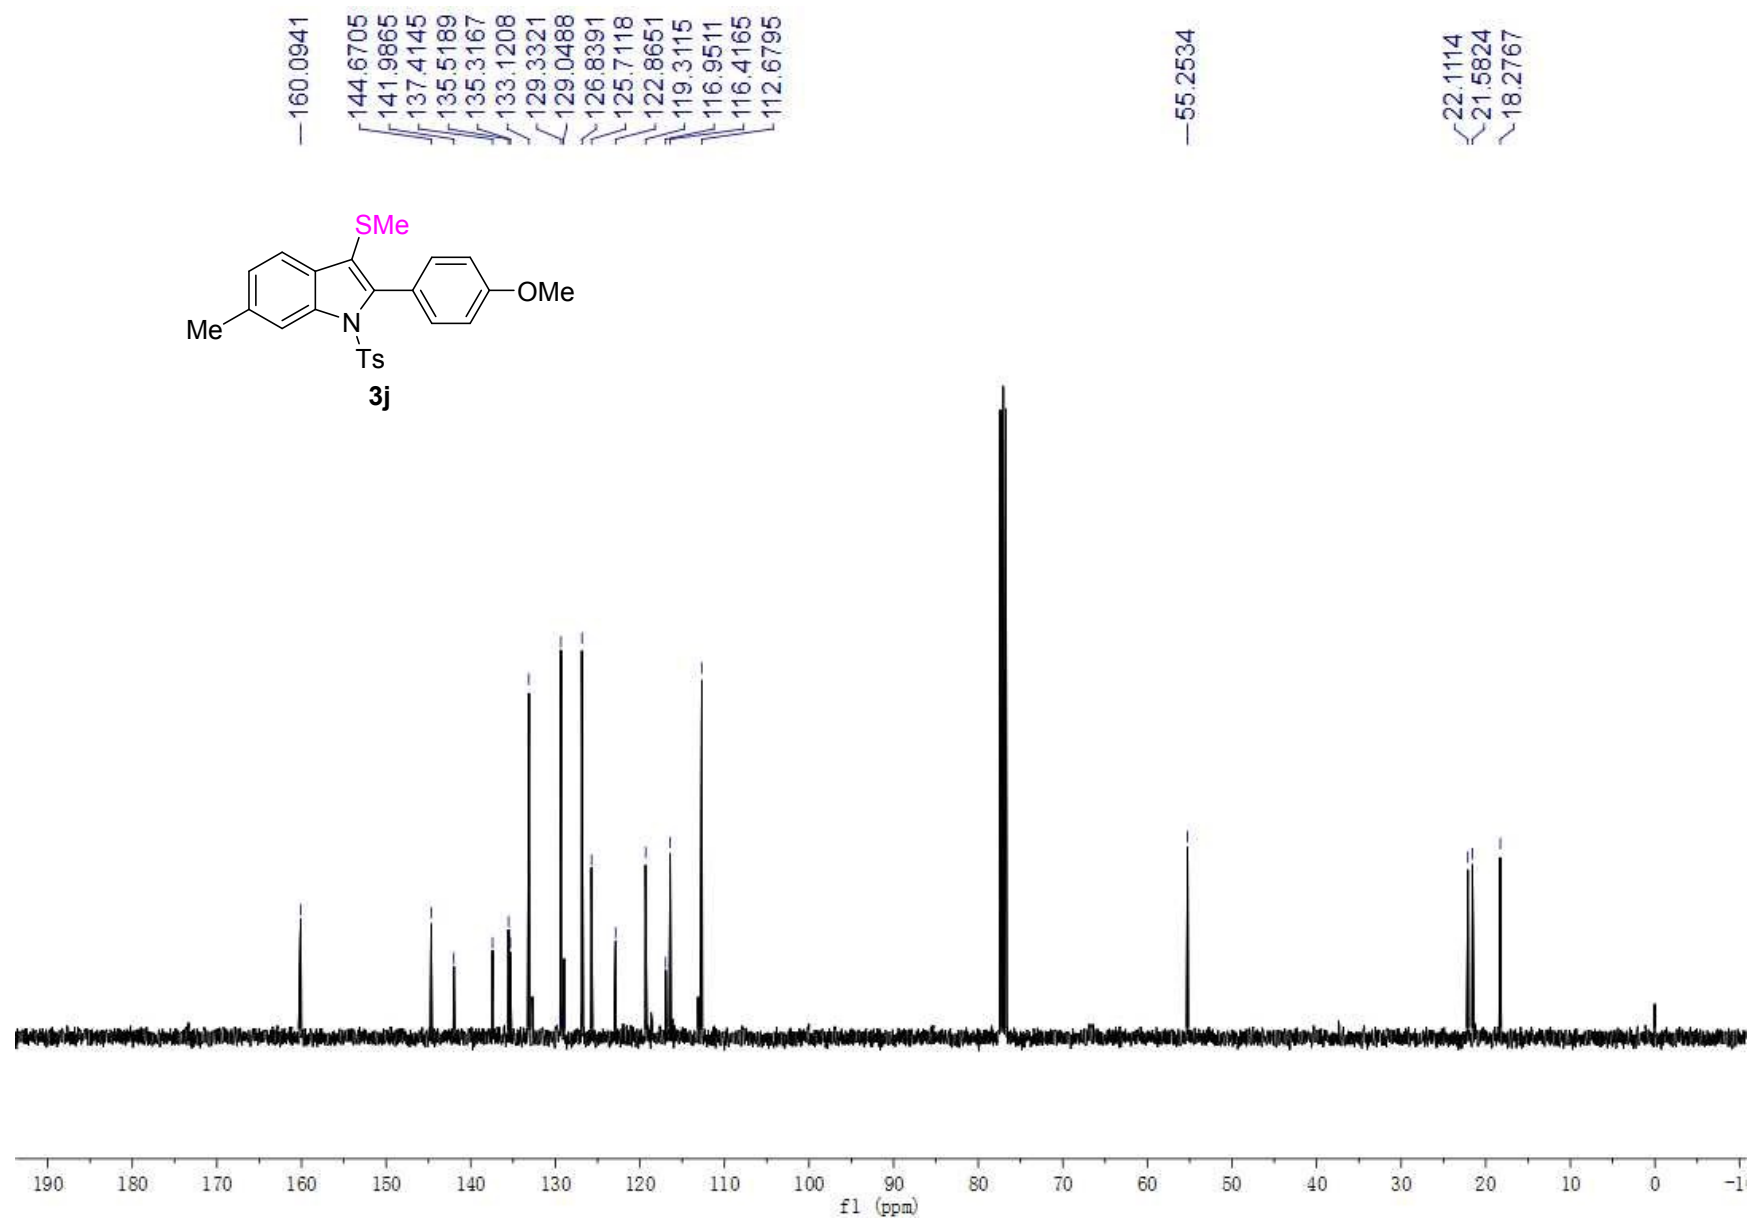

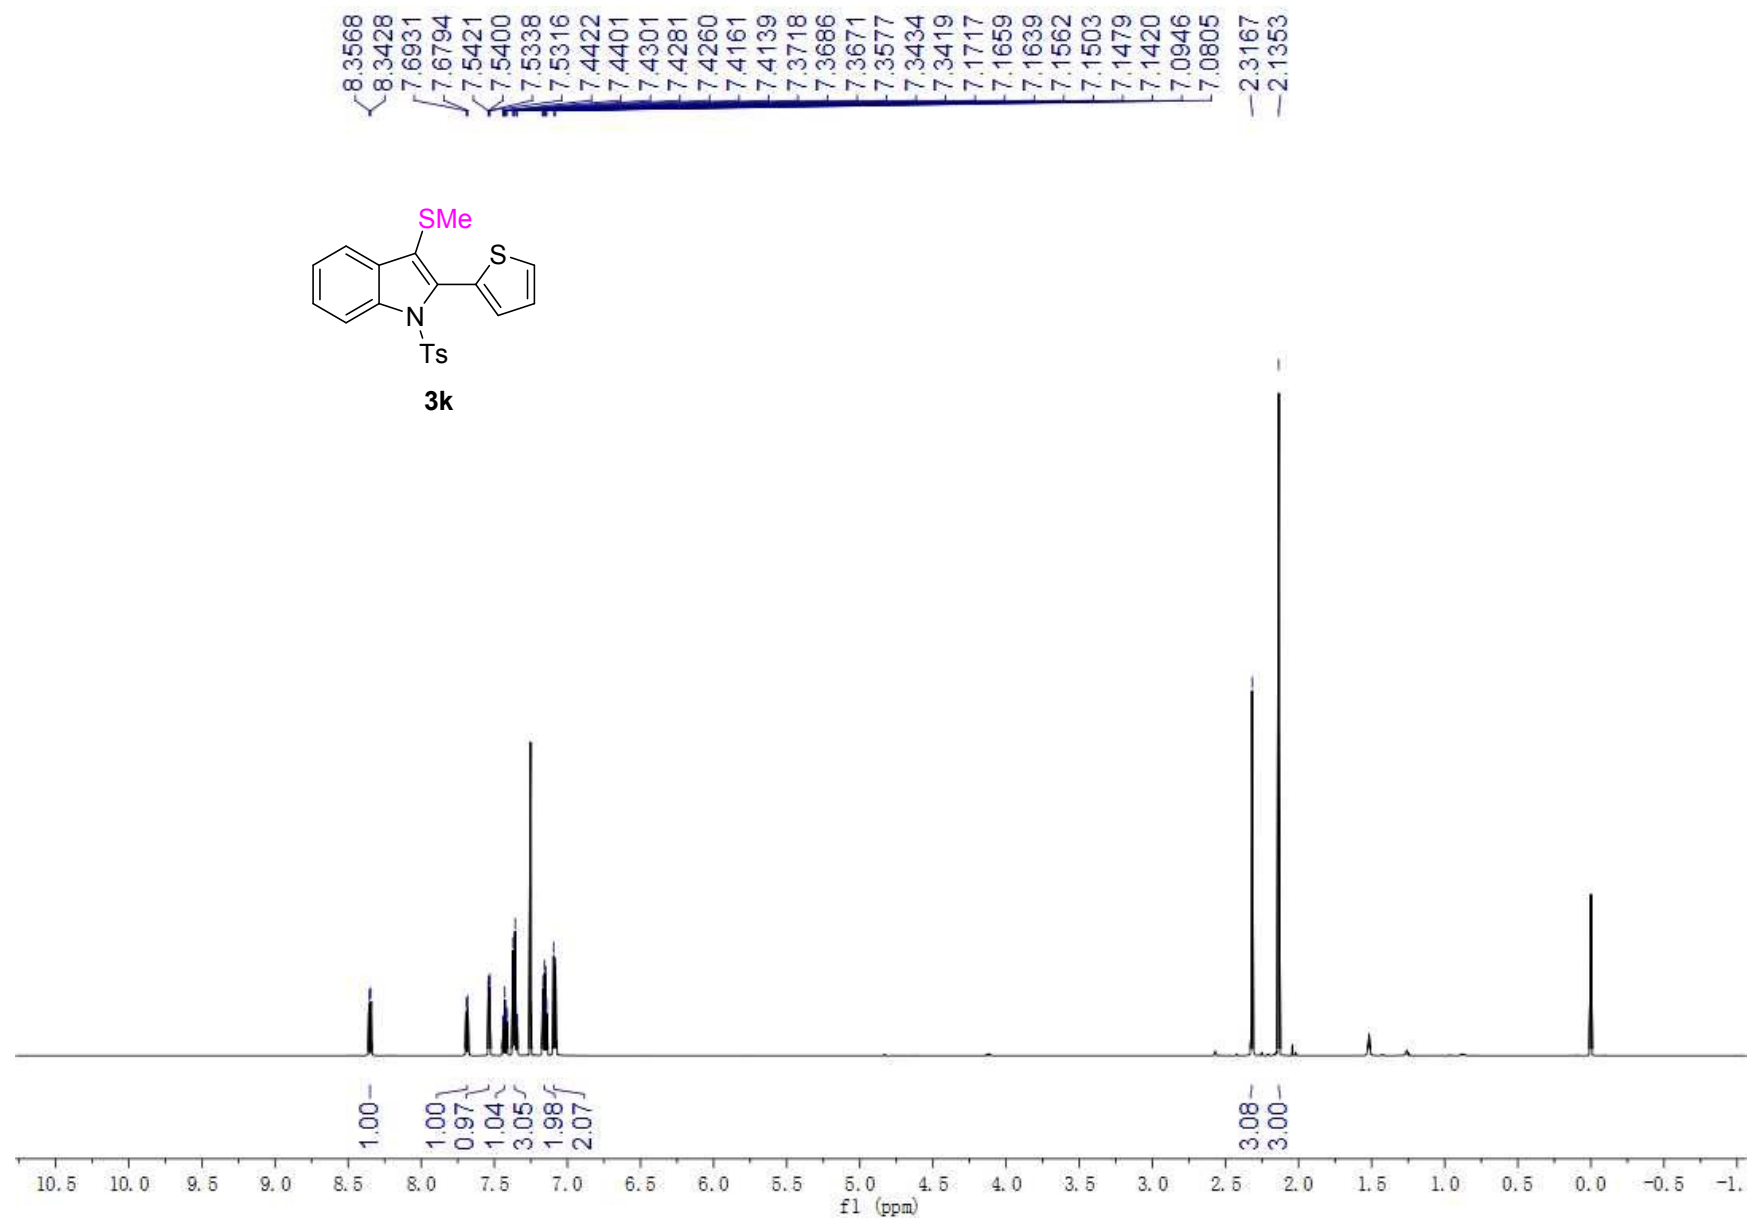

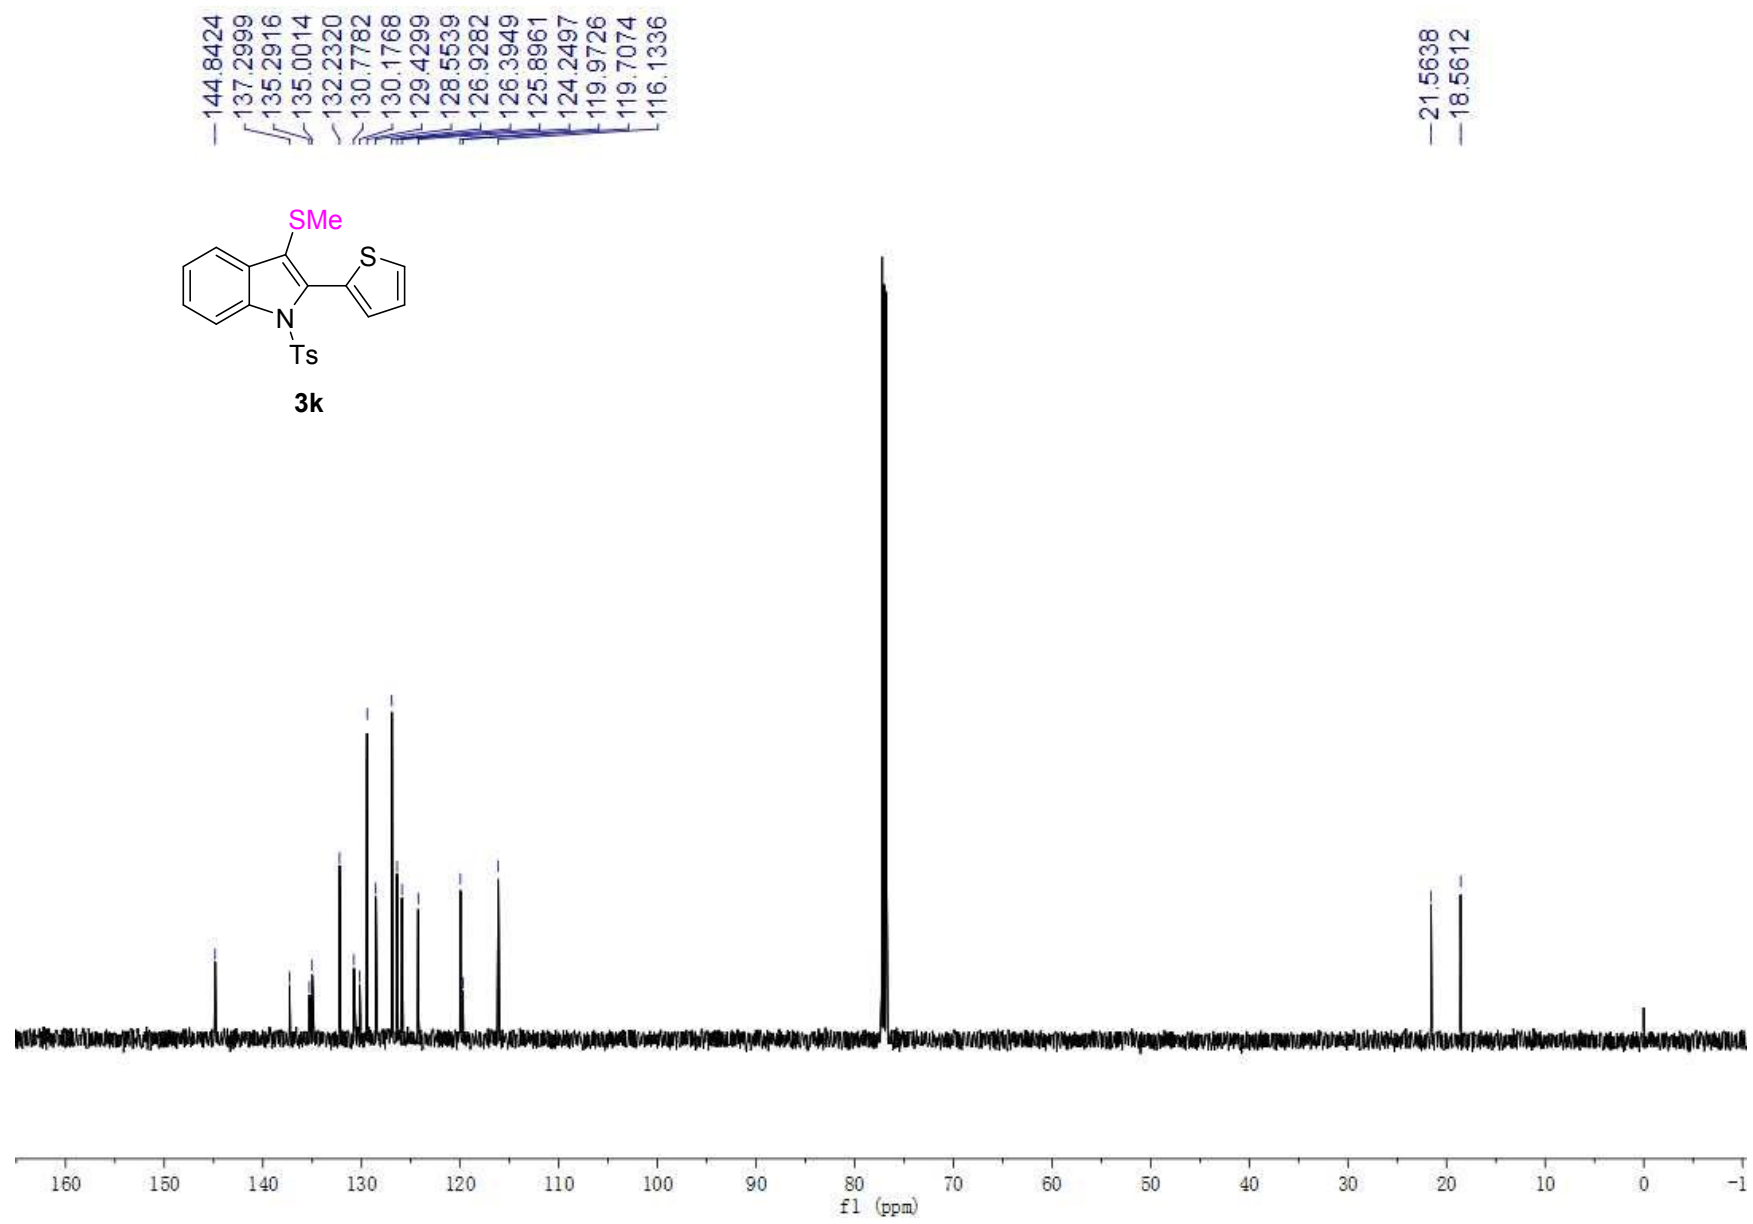

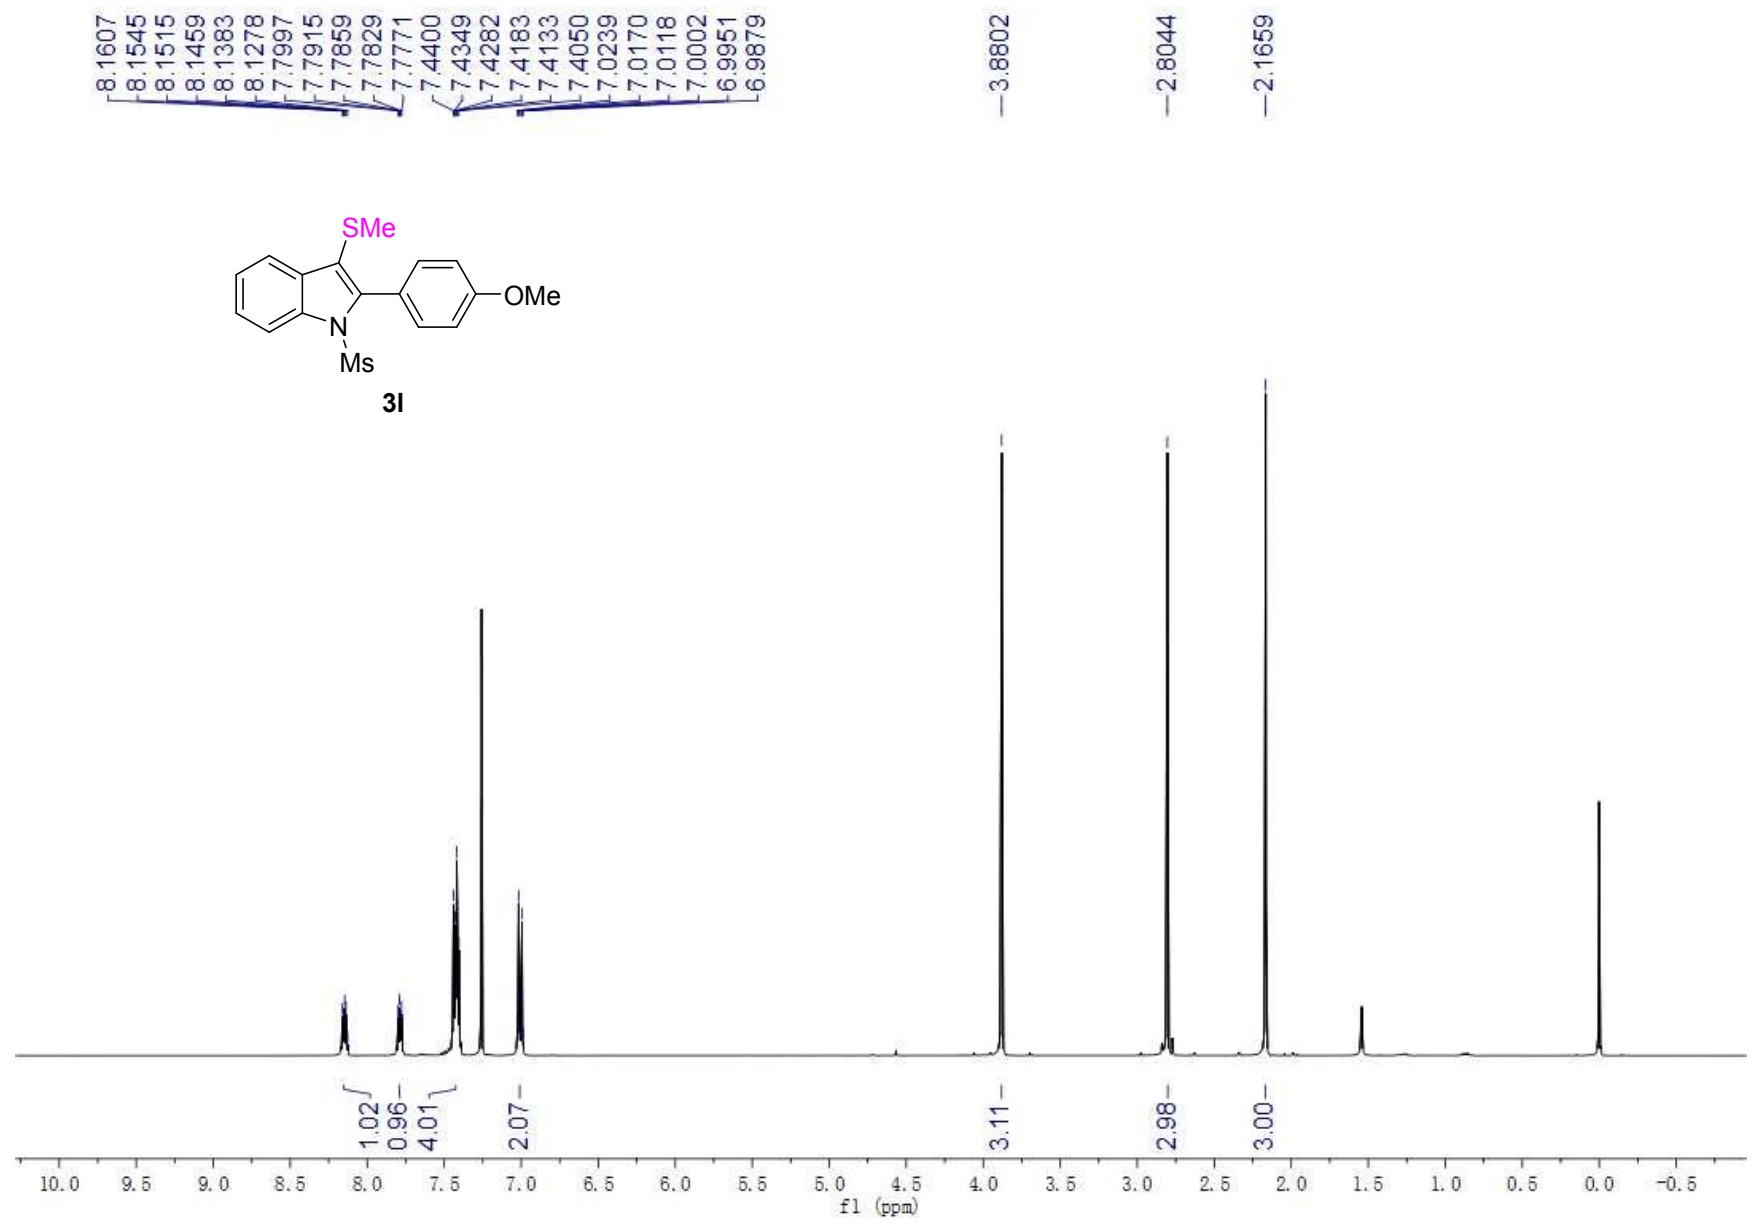

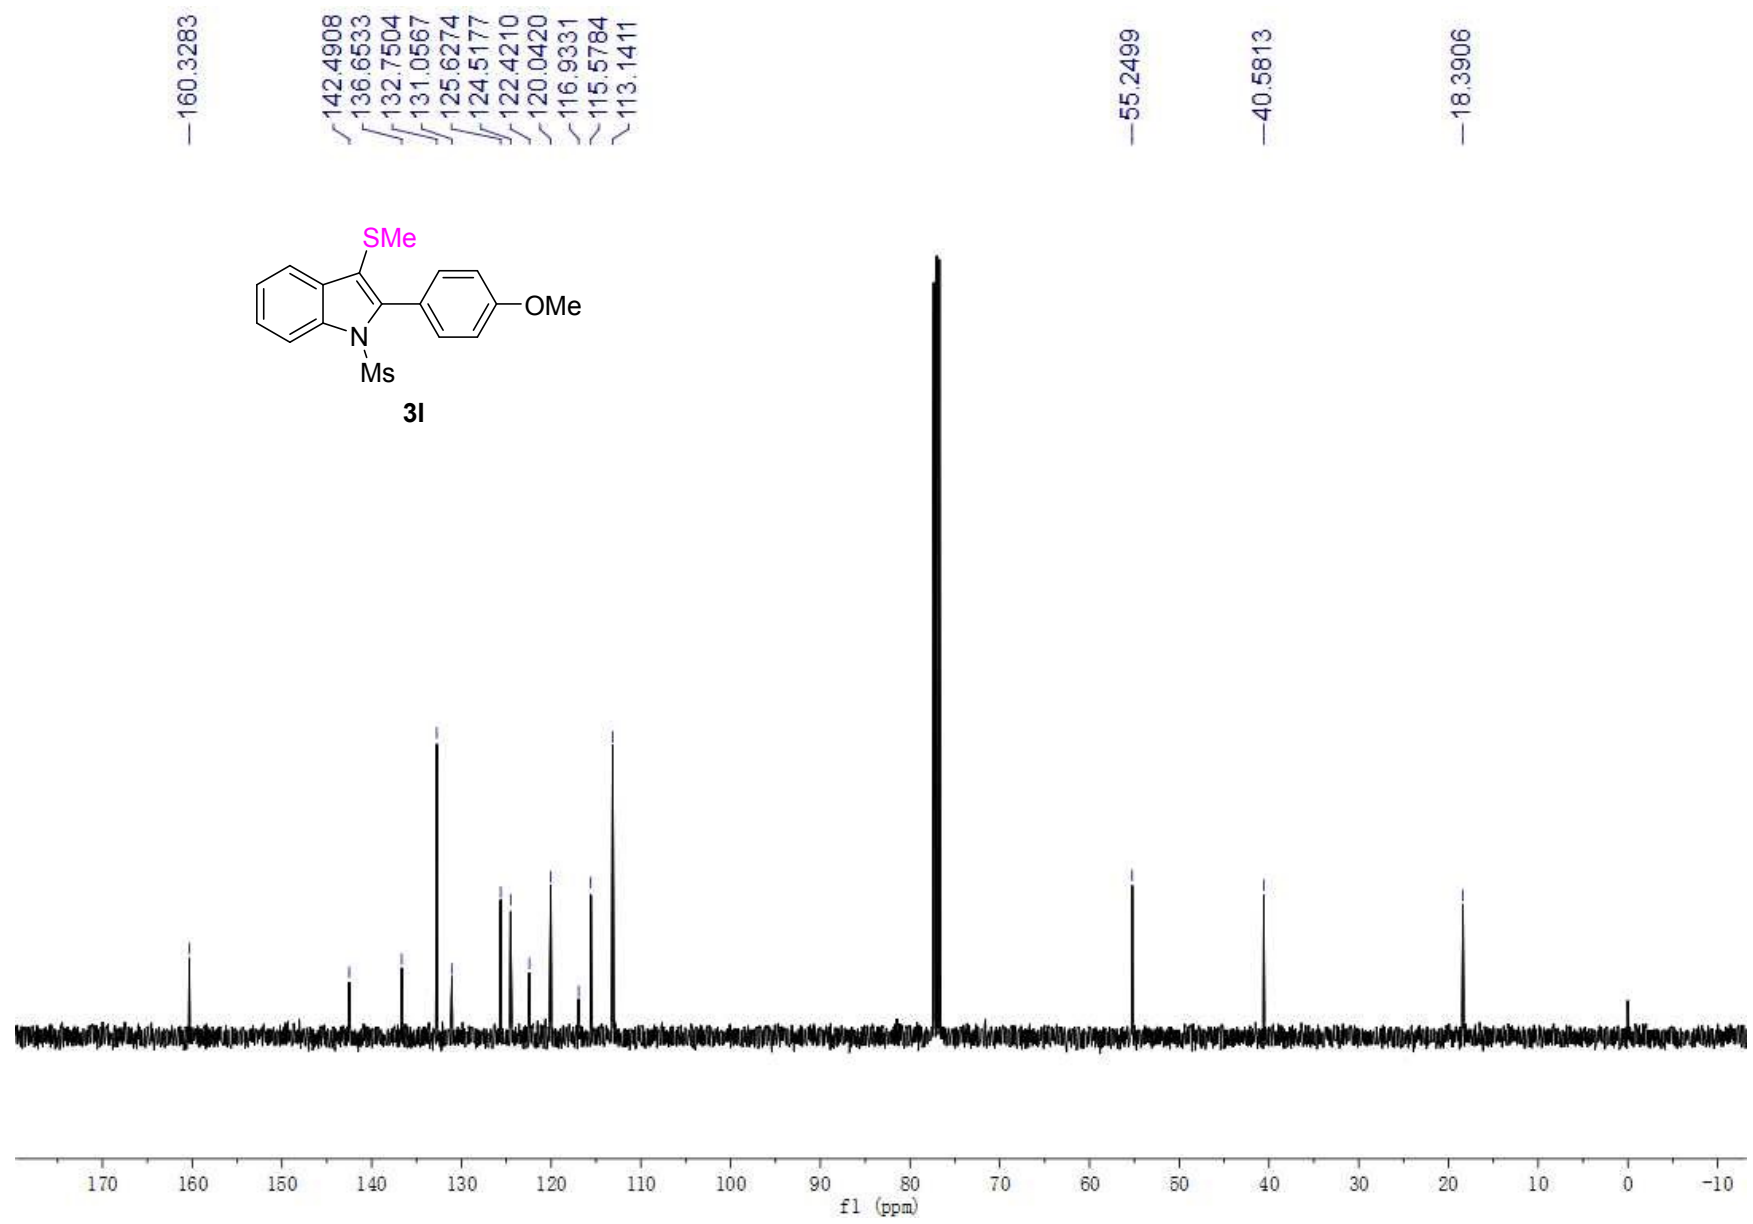

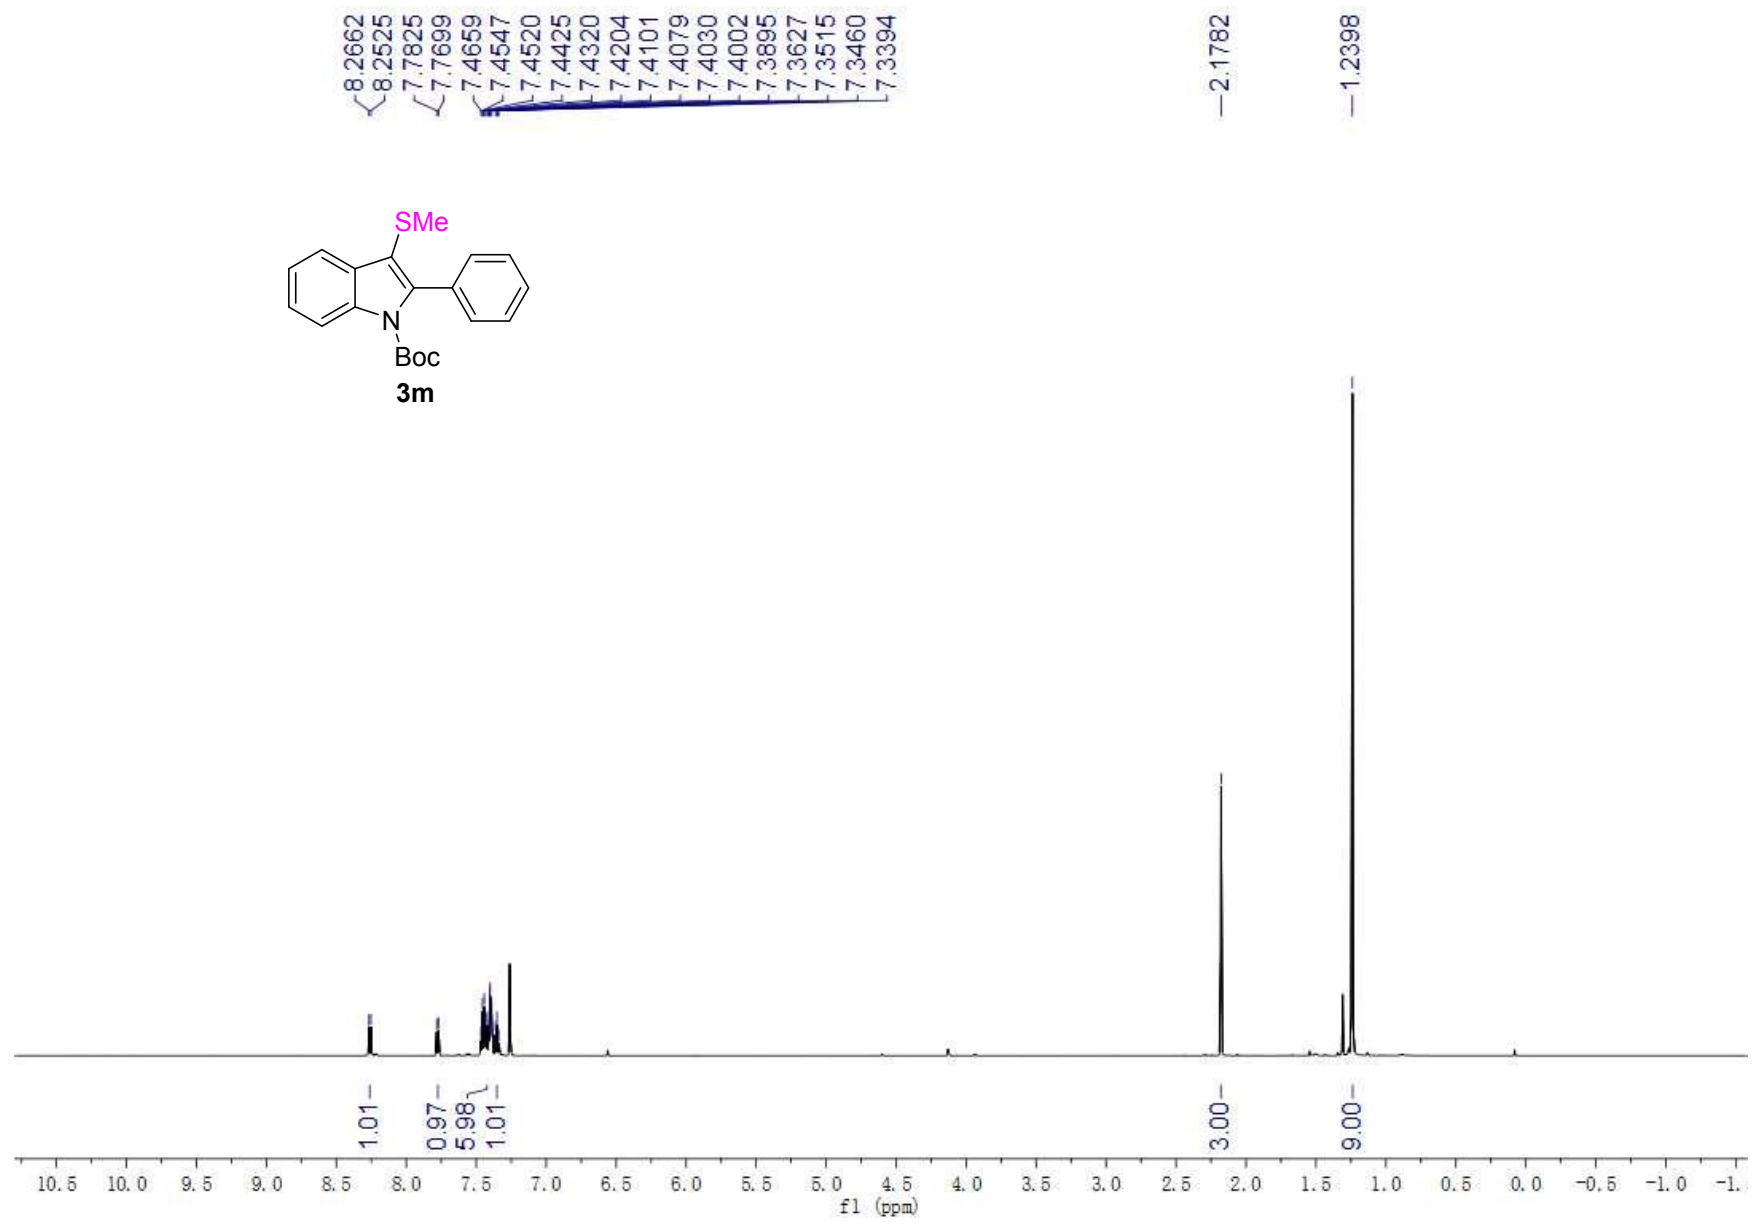

149.7065  
142.0730  
136.5452  
133.7390  
130.3081  
129.9595  
127.9709  
127.6518  
125.0431  
123.1952  
119.5008  
115.3221  
114.2005

83.6113

27.4472

18.8153

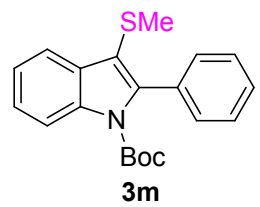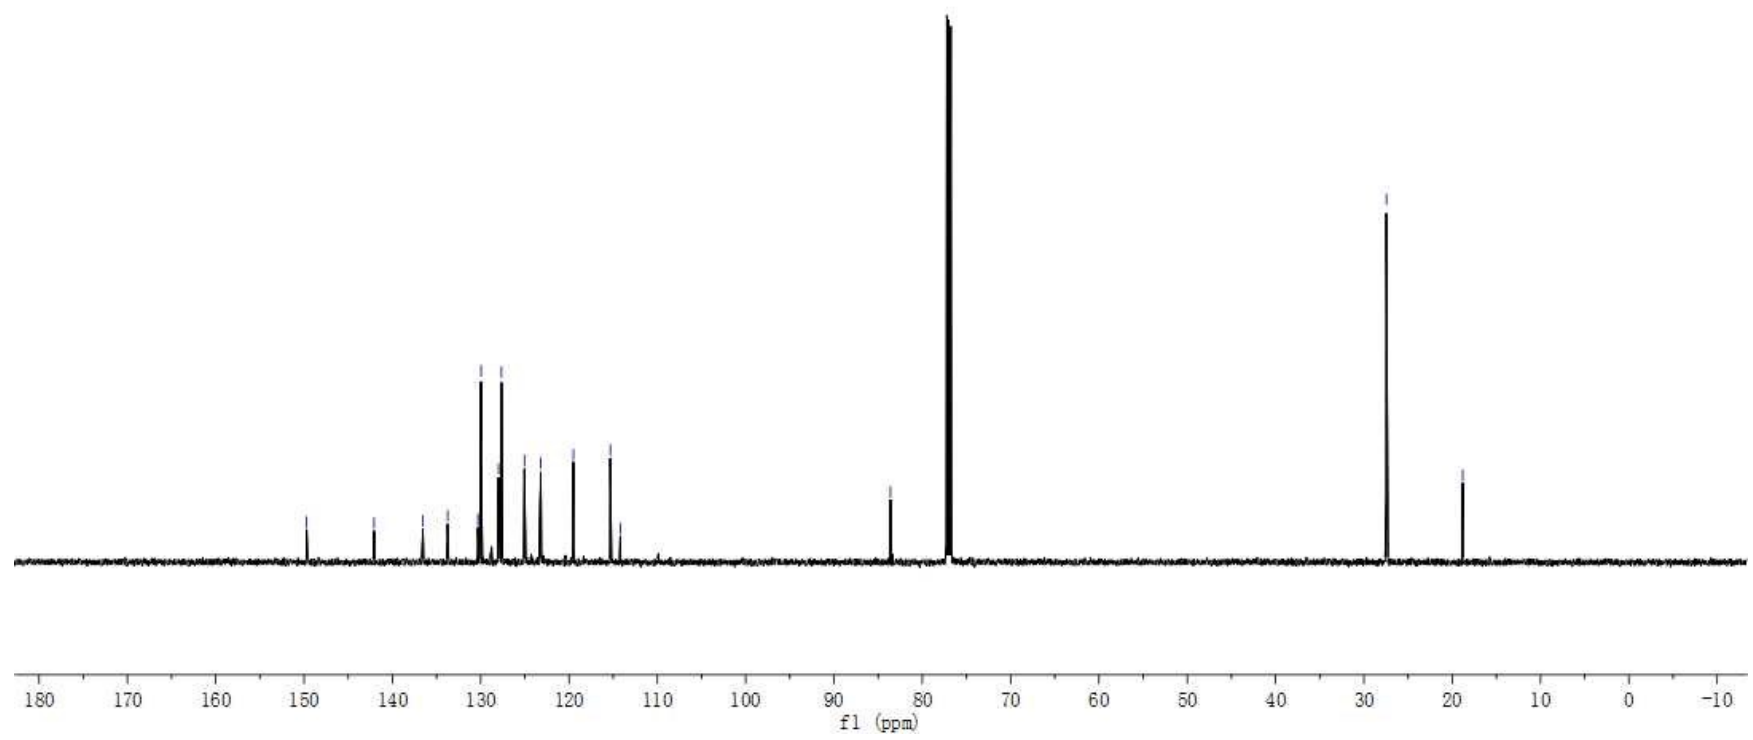

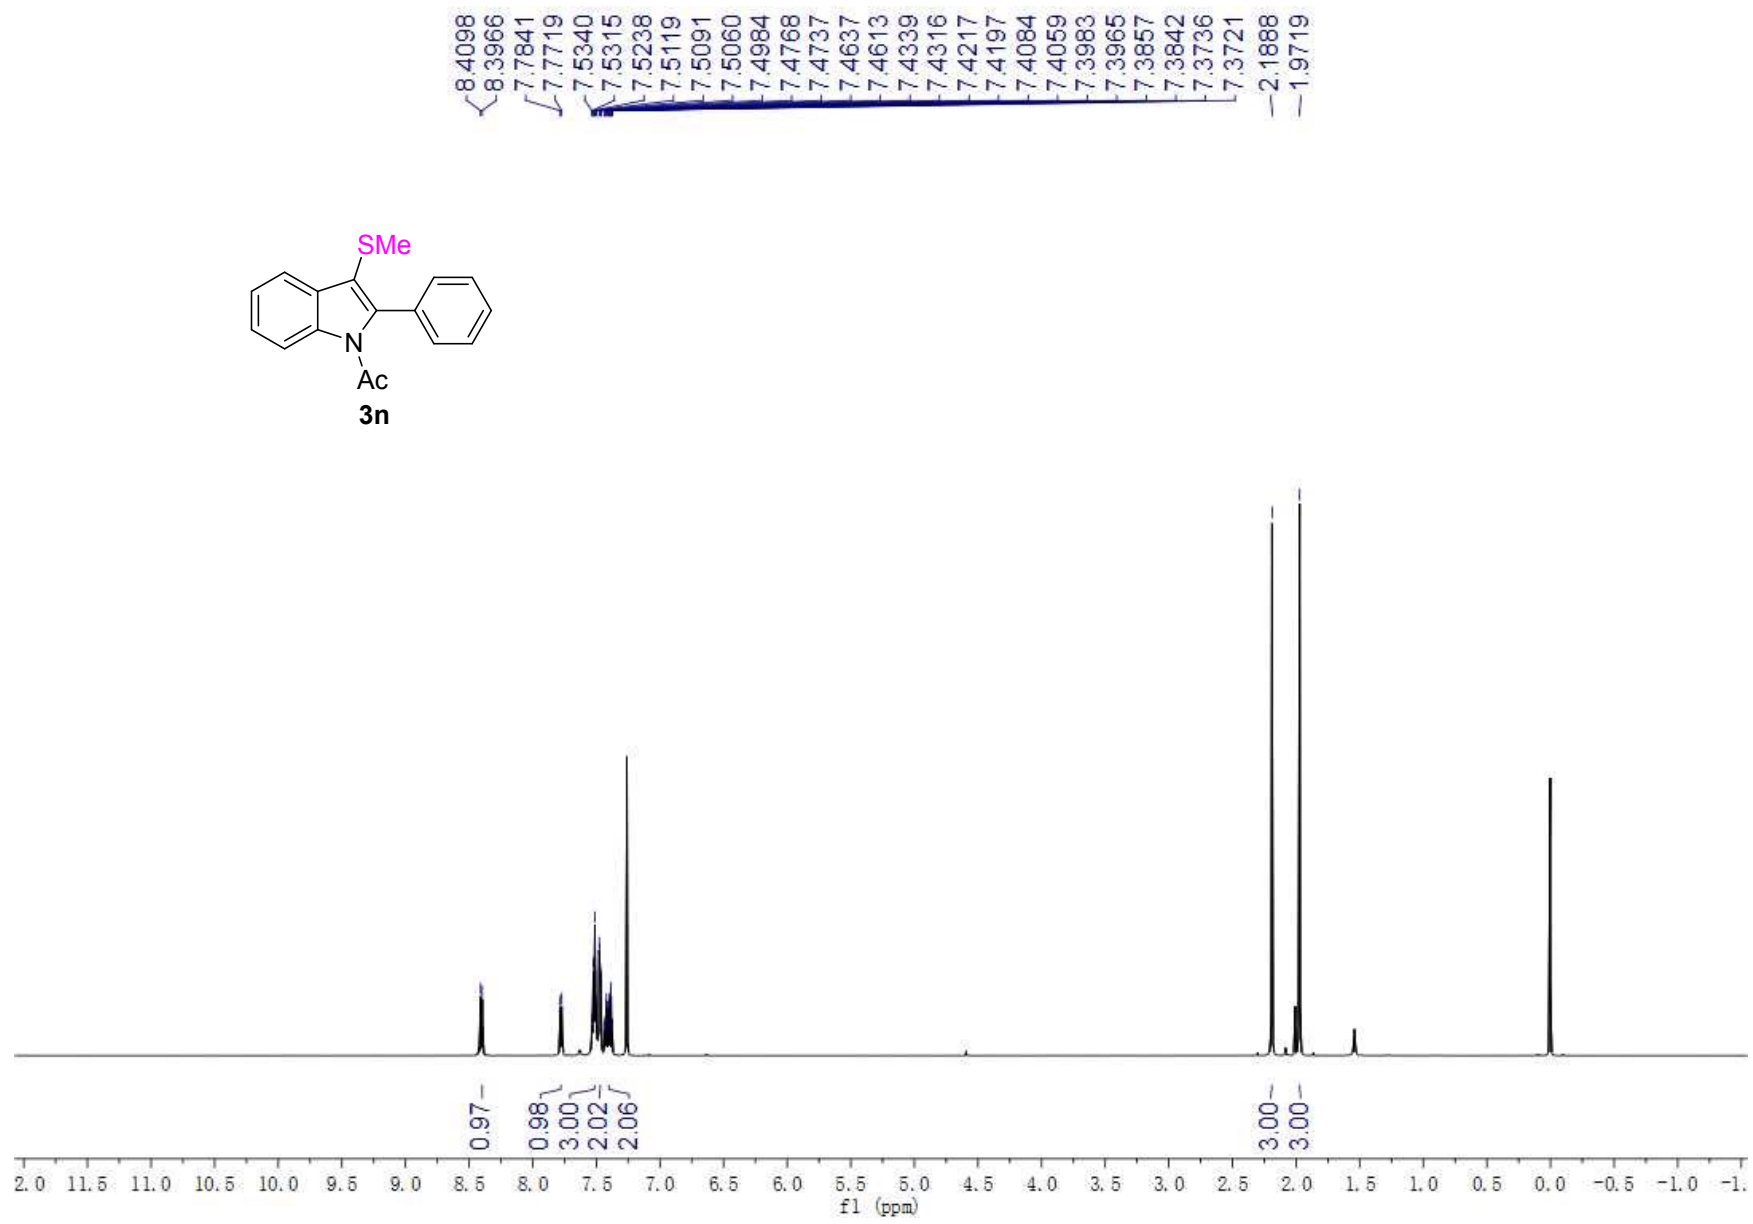



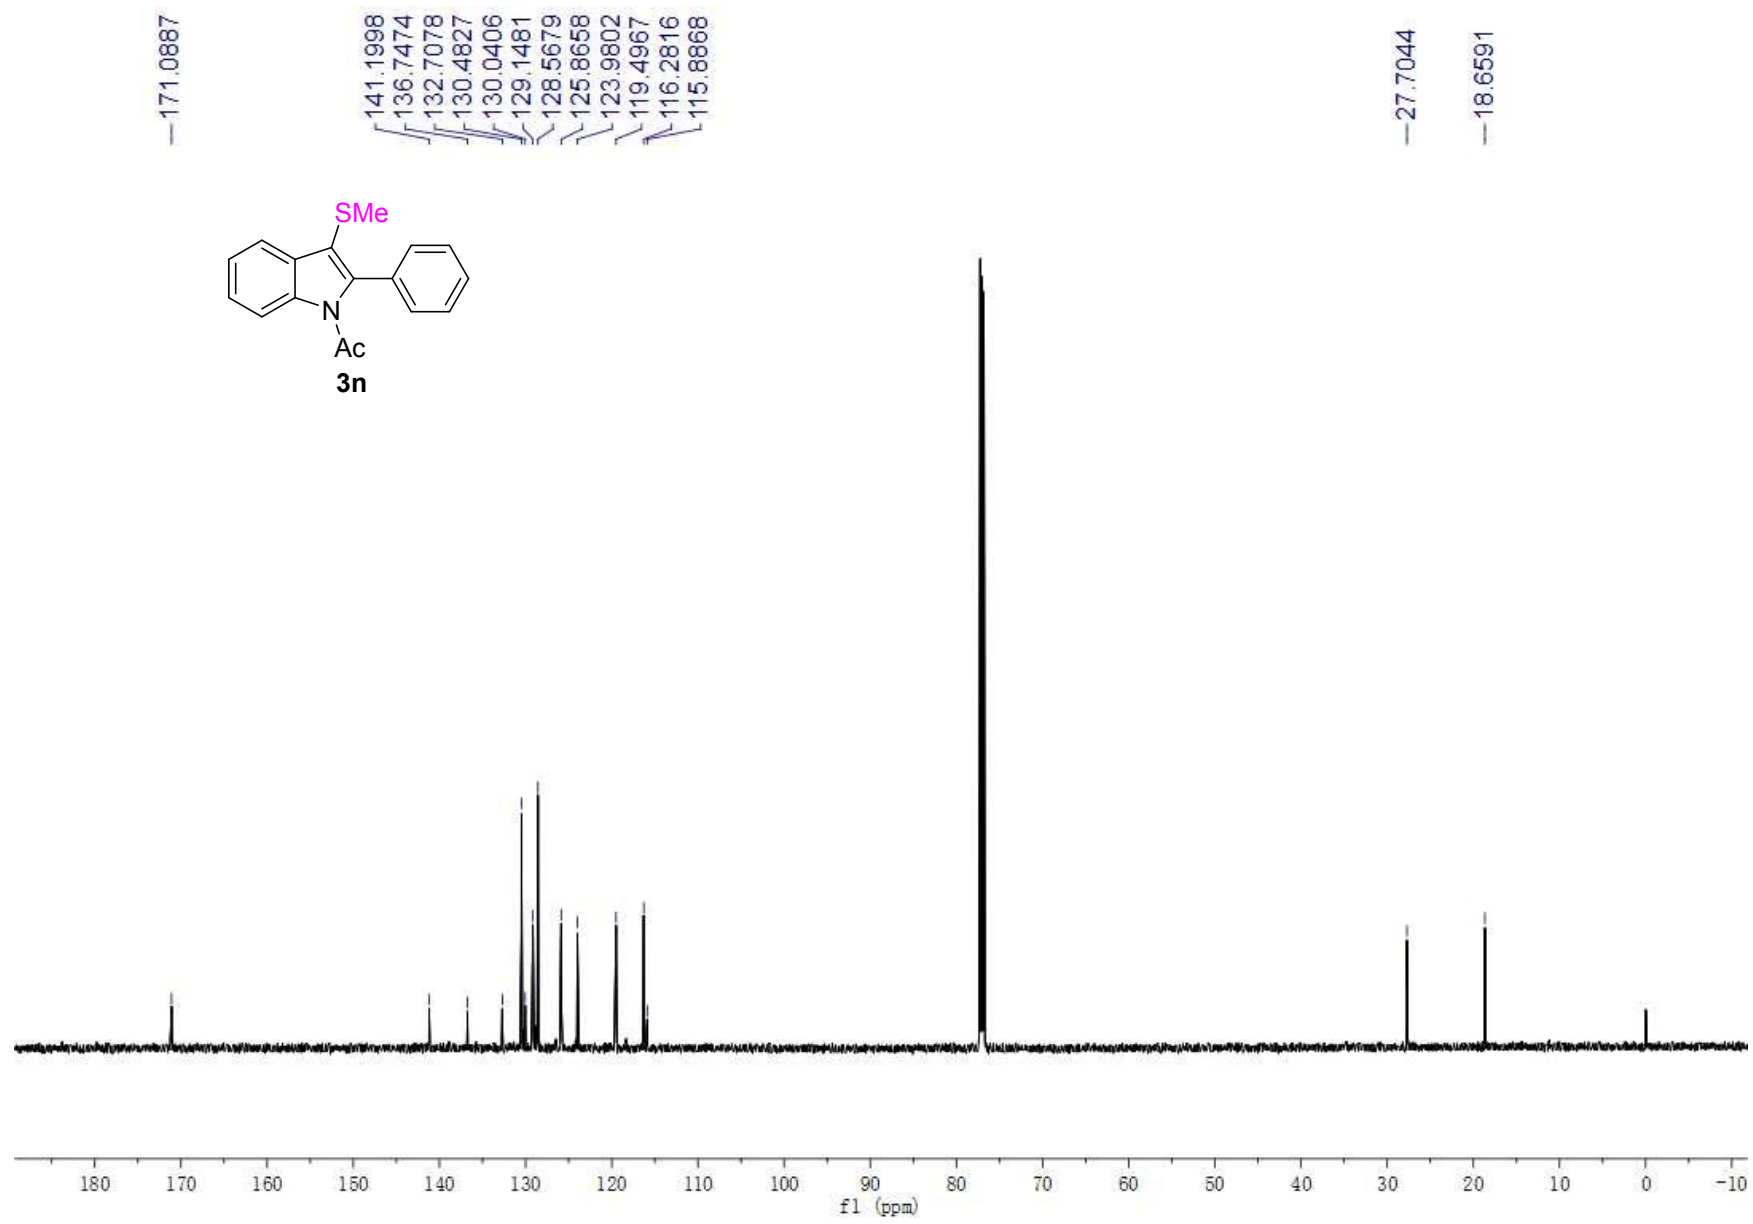

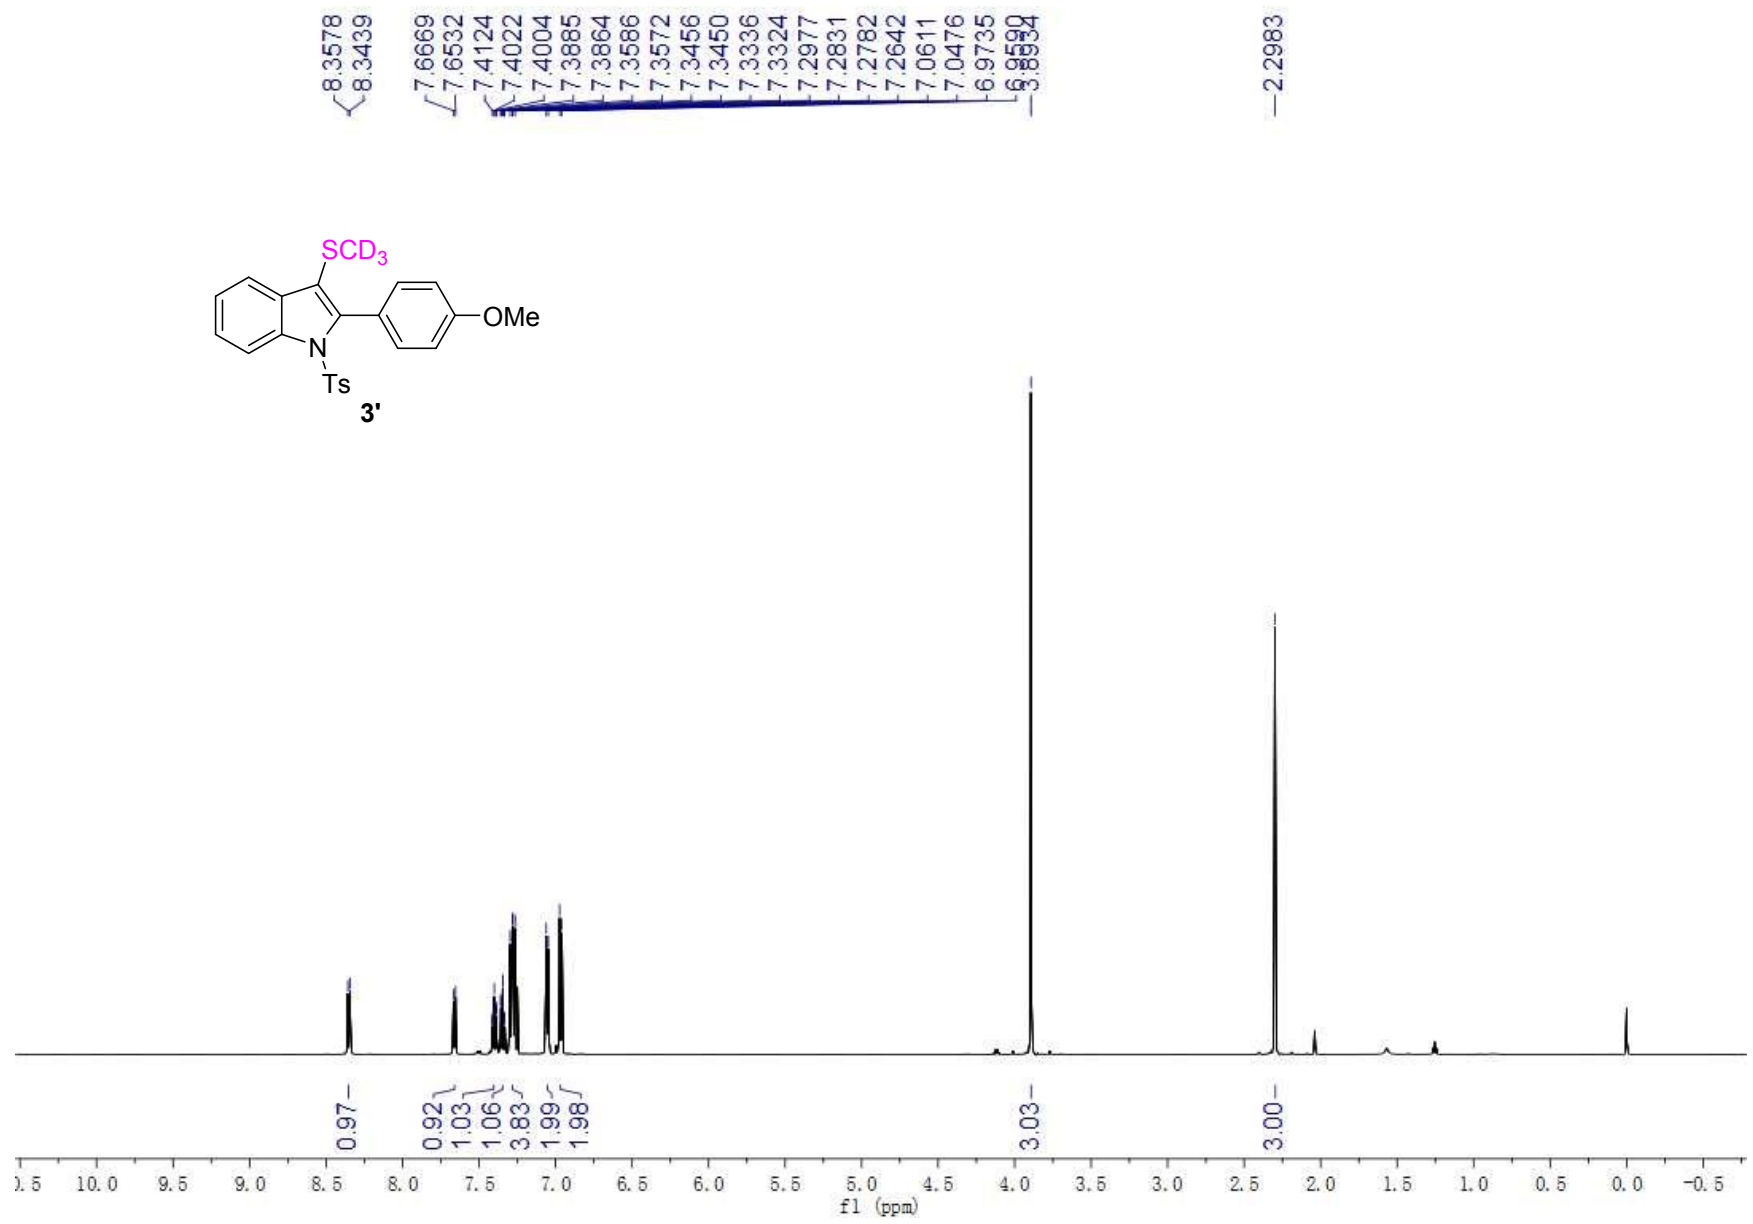

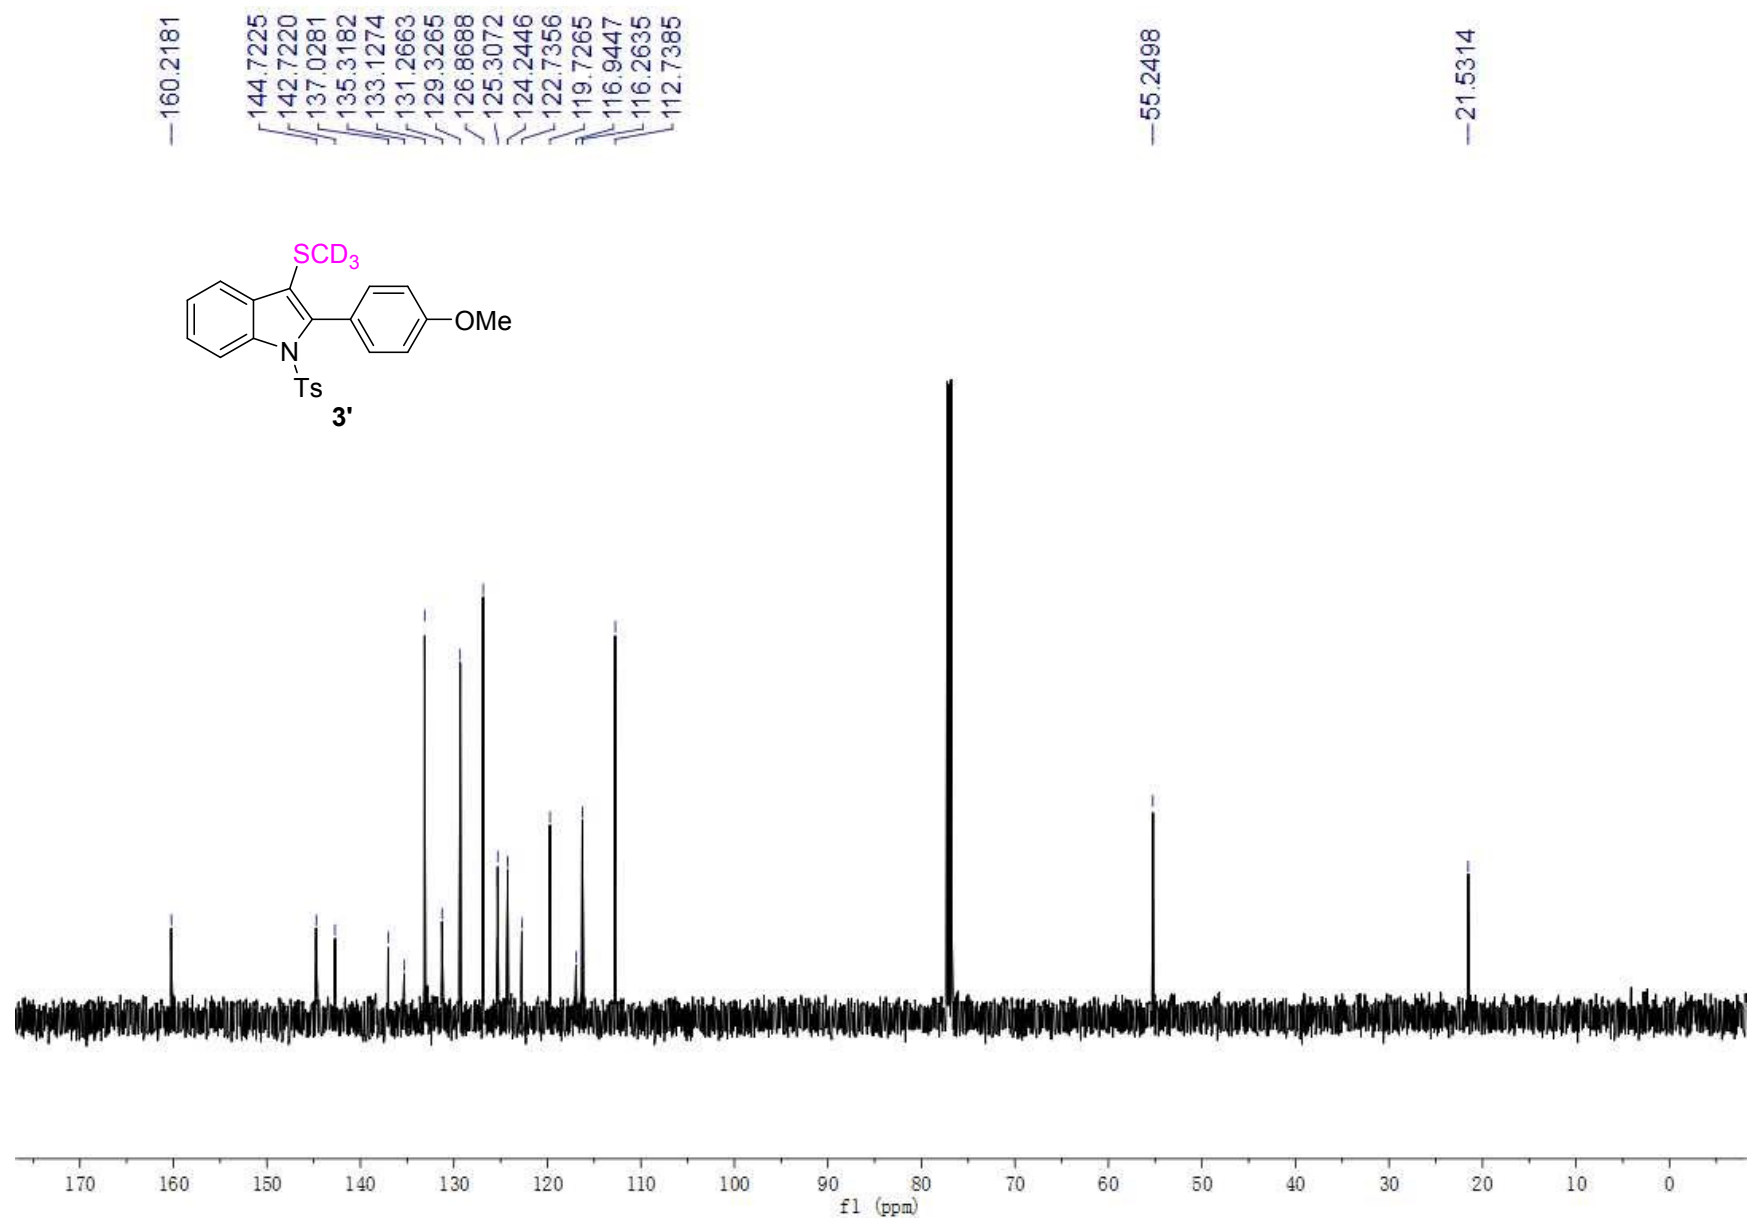

Supplement: d0cc07453e1.pdf [file d0cc07453e1.pdf]
